# Supplementary material for: Plasma-Derived Exosomal SncRNA as a Promising Diagnostic Biomarker for Early Detection of HBV-Related Acute-on-Chronic Liver Failure
Source: Front Cell Infect Microbiol. 2022 Jul 7;12:923300. doi: 10.3389/fcimb.2022.923300 (PMC9301338; doi:10.3389/fcimb.2022.923300)
Supplement: Supplementary file 3 [file Table_2.xlsx]

## Sheet: H vs N
Table S2：The differentially expressed miRNAs were analyzed by sncRNA-seq.
Gene Name	L3	N1	L6	H1	N3	L5	H4	L1	L4	N2	H3	H2	L2	baseMean	log2FoldChange	lfcSE	stat	pvalue	padj
hsa-let-7d-3p	50.639	91.189	58.224	93.709	172.653	51.704	46.754	30.271	51.235	134.869	74.914	141.217	54.678	434.082	-1.48066	0.393894	-3.75903	0.000170575	0.0101458
hsa-miR-126-3p	86301.6	79035	104627	82127.2	104074	54061.4	68264.5	57645.3	79923.2	87449	83649.7	20893.2	58279.1	418451	-1.08344	0.53951	-2.00819	0.0446235	0.268645
hsa-miR-126-5p	6789.02	6506	11163.5	6578.39	10708	2440.65	2800.94	3149.78	3556.29	14094.3	2911.03	1055.51	1651.94	32569.2	-2.2857	0.706437	-3.23553	0.00121418	0.0295981
hsa-miR-128-3p	115.428	198.622	143.95	244.08	222.778	123.17	139.072	117.445	117.11	230.682	79.587	105.784	75.549	824.775	-1.36496	0.531093	-2.57009	0.0101671	0.112531
hsa-miR-130a-3p	30.16	65.591	73.145	75.839	59.761	44.395	35.095	36.383	54.666	50.6	18.835	49.142	63.71	274.74	-1.29916	0.549898	-2.36255	0.0181497	0.160607
hsa-miR-134-5p	151.173	184.126	93.041	383.554	446.529	50.892	101.597	156.303	37.626	180.274	103.945	41.641	41.619	853.597	-1.52231	0.767154	-1.98436	0.0472161	0.279722
hsa-miR-142-3p	9995.67	17784.7	5567.54	4802.71	11365.1	4478.77	3772.06	5109.09	6321.74	8099.45	4169.28	2138.69	5804.32	41828.2	-2.48027	0.559153	-4.43576	9.17488e-06	0.00183261
hsa-miR-142-5p	584.586	924.641	734.673	324.713	833.209	443.952	239.598	318.281	978.848	714.363	332.653	54.832	144.263	3042.43	-2.41149	0.767319	-3.14275	0.0016737	0.0355542
hsa-miR-146a-5p	1835.3	5737.22	8121.48	5753.75	8305.13	2368.65	2714.1	4945.8	3739.84	4368.14	1466.7	856.873	1929.61	23235.6	-1.89693	0.719124	-2.63784	0.00834364	0.103392
hsa-miR-146b-5p	298.25	413.59	729.406	268.052	256.726	397.932	235.077	512.423	500.117	471.368	186.79	302.35	286.329	2067.03	-1.42754	0.539068	-2.64816	0.00809306	0.101917
hsa-miR-148a-3p	2416.16	3766.62	2260.49	2479.15	2660.08	1994.81	1298.16	4112.63	1848.71	2714.89	1402.84	1631.24	3871.54	14016.4	-1.69214	0.500164	-3.38316	0.000716556	0.0206603
hsa-miR-148b-3p	395.061	493.574	339.98	400.552	921.79	72.007	102.787	205.93	109.333	485.798	164.556	152.08	281.203	1834.5	-2.4614	0.646903	-3.8049	0.000141863	0.00917176
hsa-miR-150-5p	1897.11	6007.9	4373.8	2407.24	4237.65	3994.21	3418.49	1549.49	8347.94	5196.59	2551.76	1482.52	1097.47	21061.5	-1.67791	0.724158	-2.31705	0.0205009	0.1752
hsa-miR-151a-3p	2386	4104.85	2656.06	5246.41	16251.9	1453.13	1597.12	2440.01	1811.31	5002.47	1788.59	1327.86	3401.65	22136.3	-2.50078	0.600529	-4.16429	3.12323e-05	0.00333513
hsa-miR-151a-5p	122.13	270.072	385.037	201.802	525.563	362.741	190.584	194.869	163.084	360.741	251.649	123.63	186.858	1473.58	-1.61276	0.635602	-2.53737	0.0111689	0.119483
hsa-miR-155-5p	681.396	1045.85	954.109	594.945	663.738	728.46	679.654	1267.45	1412.63	1055.86	496.36	163.46	411.552	4519.92	-1.50775	0.702361	-2.14669	0.0318179	0.233654
hsa-miR-15a-5p	129.205	251.362	455.257	214.442	215.087	282.613	180.234	231.398	226.214	491.954	219.644	42.934	241.536	1395.26	-1.49502	0.711835	-2.10023	0.0357086	0.248784
hsa-miR-15b-5p	246.867	553.921	627.588	279.384	524.148	777.728	423.877	438.346	424.293	785.164	330.529	334.938	294.994	2655.68	-1.50782	0.608771	-2.47682	0.0132558	0.132125
hsa-miR-181a-5p	191.759	354.065	130.491	259.771	230.912	217.103	179.52	153.101	233.533	312.257	261.421	89.231	185.76	1235.21	-1.27838	0.603943	-2.11673	0.0342831	0.242757
hsa-miR-181b-5p	32.022	45.44	33.062	29.638	43.495	23.551	20.462	29.252	54.095	65.992	62.594	39.313	54.8	224.076	-1.17981	0.564127	-2.0914	0.0364924	0.248784
hsa-miR-191-5p	2903.57	9979.01	7229.4	9264.57	18848	8654.08	8133.48	4009.88	9309.52	9968.95	4761.09	10353.6	5484.67	46630.2	-1.4585	0.521263	-2.79801	0.00514183	0.075702
hsa-miR-192-5p	284.846	420.581	683.178	143.397	225.431	768.253	255.54	389.738	469.124	391.524	242.586	490.122	451.34	2185.16	-1.18174	0.580002	-2.03748	0.041602	0.259925
hsa-miR-196a-5p	112.449	95.61	47.691	65.379	115.456	54.411	62.457	130.98	48.948	112.744	77.18	52.504	103.498	465.396	-1.41747	0.572742	-2.47488	0.013328	0.132125
hsa-miR-196b-5p	102.768	101.881	56.176	65.379	126.418	54.682	70.428	140.44	68.733	105.048	91.058	53.797	105.573	494.13	-1.31666	0.569792	-2.31078	0.0208451	0.177123
hsa-miR-199a-3p	3234.96	5650.65	2892.46	7584.78	4310.76	1651.28	1722.16	3021.42	1962.04	5269.32	2000.31	957.743	2901.61	18673.8	-1.55873	0.627009	-2.48598	0.0129195	0.132125
hsa-miR-199a-5p	100.162	139.406	115.862	91.094	198.202	40.335	56.747	122.539	178.409	92.542	37.67	0.259	101.301	572.186	-2.22759	0.951891	-2.34017	0.019275	0.167614
hsa-miR-199b-3p	3234.96	5650.65	2892.46	7584.78	4310.76	1651.28	1722.16	3021.42	1962.04	5269.32	2000.31	957.743	2901.61	18673.8	-1.55873	0.627009	-2.48598	0.0129195	0.132125
hsa-miR-21-5p	1502.42	1181.55	1677.96	1038.21	1147.93	638.316	799.453	1758.92	1108.08	1145.14	514.77	343.474	478.435	5792.17	-1.44596	0.651052	-2.22095	0.0263542	0.204726
hsa-miR-215-5p	105.002	90.572	292.582	51.431	37.66	211.148	40.211	115.99	41.057	107.549	31.722	110.956	49.552	535.461	-1.43142	0.698936	-2.048	0.0405599	0.255562
hsa-miR-221-3p	305.325	754.599	607.985	642.453	834.182	156.195	249.948	411.132	327.541	729.947	279.123	419.255	415.579	2653.32	-1.83554	0.524448	-3.49995	0.000465341	0.0164753
hsa-miR-223-3p	3562.99	17355	6902.88	5545.41	17458.3	5698.83	6019.81	3089.53	8541.9	7496.29	3723.76	3160.84	10007.6	45872.2	-2.3071	0.602817	-3.82719	0.000129614	0.00876074
hsa-miR-224-5p	16.011	145.06	90.7	98.504	497.45	107.198	90.652	89.503	78.454	76.188	77.888	94.662	772.819	946.793	-2.11536	0.928557	-2.27811	0.0227198	0.188739
hsa-miR-23a-3p	244.26	642.643	306.918	322.534	312.685	289.381	276.002	228.778	268.414	775.929	212.28	319.42	292.919	1986.79	-1.82381	0.50034	-3.64514	0.000267244	0.0128191
hsa-miR-23b-3p	331.762	981.801	371.871	531.745	586.827	312.12	380.454	301.108	341.722	1144.94	292.859	462.448	330.144	2839.13	-1.93048	0.464813	-4.15324	3.27794e-05	0.00333513
hsa-miR-23c	83.778	142.181	95.967	95.453	71.961	90.415	63.052	112.643	120.655	230.489	79.304	0.259	106.427	578.628	-1.86343	0.942398	-1.97733	0.0480043	0.28211
hsa-miR-24-3p	577.139	905.416	587.504	432.37	772.652	309.413	395.444	649.37	308.556	559.677	348.231	392.356	666.636	3035.57	-1.71185	0.535557	-3.19639	0.0013916	0.0322748
hsa-miR-25-3p	3802.04	3483.6	3876.12	3653.79	3690.52	3669.37	3125.96	2841.39	3090.71	6243.99	2707.96	3273.86	2817.76	19517.3	-1.19928	0.431591	-2.77874	0.00545704	0.0758376
hsa-miR-26a-5p	6000.76	11264.8	8199.31	6244.52	7063.49	6059.4	5596.17	9989.41	8775.21	8456.34	5608.94	1990.23	4111.73	40015.8	-1.53044	0.607695	-2.51843	0.0117878	0.125203
hsa-miR-27a-3p	790.866	1039.17	1059.73	887.841	1995.02	496.197	332.63	756.337	649.477	1424.88	545.358	107.594	624.284	4794.77	-2.31581	0.658406	-3.51729	0.000435974	0.0162073
hsa-miR-27b-3p	835.921	1153.69	1191.39	987.652	2167.14	511.627	404.366	943.056	791.747	1641.52	577.08	107.077	720.704	5388.79	-2.30766	0.669636	-3.44615	0.000568644	0.0187905
hsa-miR-28-3p	137.769	324.766	270.931	350.429	686.635	249.317	221.515	210.732	329.142	405.761	114.708	251.398	107.282	1589.9	-1.78796	0.583388	-3.06479	0.00217826	0.0449871
hsa-miR-29a-3p	1779.45	2705.66	2967.66	2115.21	2722.94	1311.28	879.399	1834.59	1761.67	3296.69	1200.75	1303.8	771.11	10734	-1.90384	0.520873	-3.65509	0.000257089	0.0128191
hsa-miR-29b-3p	740.227	716.869	1260.44	439.78	400.206	550.609	228.177	627.976	478.731	678.962	390.573	102.68	257.403	3015.83	-1.74022	0.701968	-2.47906	0.0131728	0.132125
hsa-miR-29c-3p	1740.35	2617.76	2950.1	2110.86	2654.34	1262.29	882.016	1783.07	1798.27	3209.15	1160.96	1177.85	757.196	10505.2	-1.89333	0.531474	-3.56241	0.000367462	0.0151782
hsa-miR-30a-3p	158.992	298.755	298.726	263.693	352.202	198.696	173.929	185.846	173.834	371.707	163.282	152.856	140.479	1278.06	-1.58024	0.51636	-3.06034	0.00221086	0.0450348
hsa-miR-30a-5p	2318.61	4689	4628.94	2921.11	4702.04	3554.05	4534.76	3671.08	4132.11	5110.78	3264.93	3007.72	1954.38	21178.5	-1.13142	0.550264	-2.05614	0.0397686	0.254675
hsa-miR-30b-5p	173.886	254.24	349.635	157.344	403.477	123.711	127.413	208.258	183.098	413.265	200.526	47.331	109.112	1232.47	-1.97925	0.668244	-2.96187	0.0030578	0.0563484
hsa-miR-30c-5p	150.428	218.258	218.851	125.527	285.545	170.813	158.939	109.878	147.874	336.884	201.376	119.75	145.239	1047.4	-1.49903	0.538715	-2.78261	0.0053924	0.0758376
hsa-miR-30d-5p	1946.63	4254.95	3976.77	2647.83	4408.19	3181.84	4206.29	3226.33	3757.91	4717.91	2955.92	2805.72	1815.49	19185.5	-1.13491	0.551011	-2.05969	0.0394285	0.254675
hsa-miR-30e-3p	217.823	386.861	466.96	280.692	405.952	210.336	156.56	181.335	246.342	614.895	187.356	108.111	179.535	1614.93	-2.03917	0.583987	-3.49181	0.000479768	0.016591
hsa-miR-320c	53.618	22.617	52.08	56.226	9.459	60.637	108.14	109.587	67.018	15.007	59.478	364.941	262.407	419.966	2.0785	0.708303	2.93448	0.00334109	0.0584494
hsa-miR-320d	43.565	20.664	42.424	51.867	7.426	40.335	103.739	90.958	45.288	11.736	43.617	211.05	235.19	337.254	1.92588	0.749831	2.56842	0.0102164	0.112531
hsa-miR-335-5p	44.309	139.097	217.388	117.681	356.446	71.465	50.085	54.721	126.831	173.348	52.964	56.383	86.411	687.006	-2.44797	0.630635	-3.88175	0.000103707	0.00734342
hsa-miR-339-5p	172.769	574.482	380.941	699.55	1196.02	190.033	215.091	168.382	210.088	669.15	207.182	193.204	207.607	2258.96	-2.09002	0.596352	-3.50468	0.000457154	0.0164753
hsa-miR-361-3p	182.823	306.877	503.24	221.415	361.838	172.979	246.617	191.958	401.992	480.218	193.871	313.471	57.241	1548.91	-1.39983	0.663374	-2.11016	0.0348445	0.245516
hsa-miR-382-5p	714.163	287.241	158.579	306.843	1225.55	96.37	101.716	319.009	115.165	140.833	132.551	261.485	95.321	1704.17	-2.35388	0.801956	-2.93517	0.00333363	0.0584494
hsa-miR-423-3p	69.257	133.751	48.861	148.627	217.474	96.099	94.697	65.927	89.891	78.882	77.463	164.236	76.891	565.786	-1.12681	0.496217	-2.2708	0.023159	0.189217
hsa-miR-425-3p	25.32	139.097	98.015	119.861	318.785	44.124	21.89	41.331	49.863	77.728	19.684	203.549	54.312	504.104	-2.20074	0.676503	-3.25311	0.00114148	0.0282896
hsa-miR-425-5p	326.921	575.305	412.54	264.565	394.99	278.823	282.188	462.796	148.56	679.732	320.474	213.119	294.628	2072.62	-1.69853	0.589773	-2.87997	0.00397717	0.0657116
hsa-miR-432-5p	382.401	631.848	260.105	599.303	3651.53	77.421	88.868	436.163	145.472	407.878	115.699	216.481	74.694	3307.42	-3.51264	0.837556	-4.19392	2.74179e-05	0.00333513
hsa-miR-451a	605.437	1171.68	1351.73	920.966	455.193	385.48	387.354	700.743	644.331	2138.86	862.575	631.598	966.756	4793.03	-1.61551	0.610656	-2.64554	0.00815607	0.101917
hsa-miR-584-5p	265.856	460.881	265.372	320.791	514.247	173.52	148.708	224.121	130.605	331.882	99.414	278.038	367.004	1546.89	-1.98253	0.506574	-3.91359	9.09325e-05	0.00676083
hsa-miR-625-3p	26.064	114.424	115.862	54.482	309.768	101.784	77.685	39.294	107.617	117.169	11.612	101.904	63.1	551.01	-2.35476	0.720788	-3.26692	0.00108724	0.0278746
hsa-miR-664a-5p	103.513	141.462	112.937	175.214	312.243	43.583	98.028	65.636	138.381	116.207	79.587	205.877	121.317	703.719	-1.34498	0.512026	-2.62678	0.00861966	0.105929
hsa-miR-744-5p	116.917	607.792	133.125	230.132	884.484	180.558	123.606	99.545	178.981	328.803	97.573	356.147	123.88	1577.64	-2.61106	0.507555	-5.14438	2.68408e-07	7.98245e-05
hsa-miR-7847-3p	317.613	16.86	122.007	49.688	24.311	20.573	29.742	68.255	7.434	14.622	130.427	2483.46	138.16	782.774	3.5874	1.062	3.37796	0.000730267	0.0206603
hsa-miR-92a-3p	459.477	658.784	121.421	347.378	591.866	535.449	527.139	253.519	364.709	712.824	481.348	322.524	258.99	2501.43	-1.26346	0.642223	-1.96732	0.0491459	0.285468
hsa-miR-941	32.767	122.854	56.176	30.074	62.502	29.777	34.857	9.751	34.081	10.967	15.719	108.111	35.516	250.111	-1.69228	0.775857	-2.18118	0.0291699	0.218606
hsa-miR-99b-5p	490.754	614.166	526.062	642.017	1144.57	413.904	724.386	473.42	448.081	789.205	535.304	578.06	364.44	3316.82	-1.1099	0.498991	-2.22429	0.0261288	0.204492

## Sheet: L vs N
Table S2：The differentially expressed miRNAs were analyzed by sncRNA-seq.
Gene Name	L3	N1	L6	H1	N3	L5	H4	L1	L4	N2	H3	H2	L2	baseMean	log2FoldChange	lfcSE	stat	pvalue	padj
hsa-let-7d-3p	50.639	91.189	58.224	93.709	172.653	51.704	46.754	30.271	51.235	134.869	74.914	141.217	54.678	434.082	-1.82915	0.365263	-5.00777	5.5065e-07	0.000116974
hsa-miR-103a-3p	1933.6	5547.33	2782.16	3815.05	5136.64	4447.37	5743.1	3437.35	3588.54	4959.56	2443.7	4180.91	2668.62	22081.7	-1.16213	0.508613	-2.28489	0.0223191	0.165117
hsa-miR-107	1740.35	4874.67	2551.02	3441.09	4387.59	4134.98	5225.47	3152.54	3222	4468.18	2174.92	3960.81	2401.08	19831.8	-1.10474	0.511393	-2.16027	0.030752	0.202895
hsa-miR-122-5p	15573.4	15733.9	30373.5	17690.6	5560.36	27304.7	31507.6	83032.9	22847.9	6107.01	9241.64	11710.7	22688.4	127008	1.35765	0.676047	2.00822	0.04462	0.249436
hsa-miR-125a-5p	902.571	3483.49	1663.33	1780.47	4300.24	2786.34	5547.52	1391.59	4334.31	3618.37	2793.63	2305	1574.93	16216.5	-1.26274	0.643386	-1.96265	0.0496871	0.26482
hsa-miR-126-5p	6789.02	6506	11163.5	6578.39	10708	2440.65	2800.94	3149.78	3556.29	14094.3	2911.03	1055.51	1651.94	32569.2	-1.50451	0.654027	-2.30039	0.0214264	0.160105
hsa-miR-128-3p	115.428	198.622	143.95	244.08	222.778	123.17	139.072	117.445	117.11	230.682	79.587	105.784	75.549	824.775	-1.3306	0.491742	-2.70588	0.00681236	0.0883159
hsa-miR-1290	105.002	66.413	416.051	177.394	7.072	42.771	147.28	741.638	213.519	140.448	100.405	828.682	514.928	1239.96	1.84438	0.840178	2.19522	0.0281475	0.192882
hsa-miR-134-5p	151.173	184.126	93.041	383.554	446.529	50.892	101.597	156.303	37.626	180.274	103.945	41.641	41.619	853.597	-2.01087	0.710456	-2.8304	0.00464895	0.0696064
hsa-miR-139-3p	173.514	205.921	145.121	113.323	530.955	192.74	231.27	69.71	179.095	212.981	222.902	731.95	103.132	1215.49	-1.53231	0.555411	-2.75888	0.0057999	0.0790984
hsa-miR-139-5p	113.566	231.109	145.706	117.681	171.592	99.618	178.687	130.834	79.255	266.66	246.126	99.835	140.967	892.22	-1.36482	0.551899	-2.47296	0.0134	0.129711
hsa-miR-142-3p	9995.67	17784.7	5567.54	4802.71	11365.1	4478.77	3772.06	5109.09	6321.74	8099.45	4169.28	2138.69	5804.32	41828.2	-1.53983	0.517666	-2.97456	0.00293409	0.05527
hsa-miR-148b-3p	395.061	493.574	339.98	400.552	921.79	72.007	102.787	205.93	109.333	485.798	164.556	152.08	281.203	1834.5	-1.8913	0.598799	-3.15849	0.0015859	0.0362805
hsa-miR-151a-3p	2386	4104.85	2656.06	5246.41	16251.9	1453.13	1597.12	2440.01	1811.31	5002.47	1788.59	1327.86	3401.65	22136.3	-2.23397	0.555978	-4.0181	5.86689e-05	0.00459161
hsa-miR-181a-5p	191.759	354.065	130.491	259.771	230.912	217.103	179.52	153.101	233.533	312.257	261.421	89.231	185.76	1235.21	-1.16169	0.55915	-2.0776	0.0377459	0.223905
hsa-miR-191-5p	2903.57	9979.01	7229.4	9264.57	18848	8654.08	8133.48	4009.88	9309.52	9968.95	4761.09	10353.6	5484.67	46630.2	-1.44242	0.482597	-2.98886	0.0028002	0.0540765
hsa-miR-199a-3p	3234.96	5650.65	2892.46	7584.78	4310.76	1651.28	1722.16	3021.42	1962.04	5269.32	2000.31	957.743	2901.61	18673.8	-1.43394	0.580497	-2.4702	0.0135039	0.129711
hsa-miR-199b-3p	3234.96	5650.65	2892.46	7584.78	4310.76	1651.28	1722.16	3021.42	1962.04	5269.32	2000.31	957.743	2901.61	18673.8	-1.43394	0.580497	-2.4702	0.0135039	0.129711
hsa-miR-221-3p	305.325	754.599	607.985	642.453	834.182	156.195	249.948	411.132	327.541	729.947	279.123	419.255	415.579	2653.32	-1.5142	0.48551	-3.11879	0.00181595	0.0403032
hsa-miR-223-3p	3562.99	17355	6902.88	5545.41	17458.3	5698.83	6019.81	3089.53	8541.9	7496.29	3723.76	3160.84	10007.6	45872.2	-1.67394	0.558095	-2.99937	0.00270535	0.0529324
hsa-miR-23a-3p	244.26	642.643	306.918	322.534	312.685	289.381	276.002	228.778	268.414	775.929	212.28	319.42	292.919	1986.79	-1.53941	0.463184	-3.32355	0.000888807	0.0303885
hsa-miR-23b-3p	331.762	981.801	371.871	531.745	586.827	312.12	380.454	301.108	341.722	1144.94	292.859	462.448	330.144	2839.13	-1.90109	0.430345	-4.4176	9.98016e-06	0.00164894
hsa-miR-24-3p	577.139	905.416	587.504	432.37	772.652	309.413	395.444	649.37	308.556	559.677	348.231	392.356	666.636	3035.57	-1.02973	0.495757	-2.07708	0.0377943	0.223905
hsa-miR-27a-3p	790.866	1039.17	1059.73	887.841	1995.02	496.197	332.63	756.337	649.477	1424.88	545.358	107.594	624.284	4794.77	-1.42825	0.609501	-2.34332	0.0191132	0.148803
hsa-miR-27b-3p	835.921	1153.69	1191.39	987.652	2167.14	511.627	404.366	943.056	791.747	1641.52	577.08	107.077	720.704	5388.79	-1.38956	0.619904	-2.24157	0.0249891	0.180278
hsa-miR-28-3p	137.769	324.766	270.931	350.429	686.635	249.317	221.515	210.732	329.142	405.761	114.708	251.398	107.282	1589.9	-1.49314	0.540067	-2.76473	0.00569696	0.0784387
hsa-miR-29a-3p	1779.45	2705.66	2967.66	2115.21	2722.94	1311.28	879.399	1834.59	1761.67	3296.69	1200.75	1303.8	771.11	10734	-1.16326	0.482209	-2.41235	0.0158501	0.138087
hsa-miR-29c-3p	1740.35	2617.76	2950.1	2110.86	2654.34	1262.29	882.016	1783.07	1798.27	3209.15	1160.96	1177.85	757.196	10505.2	-1.14087	0.492024	-2.31874	0.0204092	0.154752
hsa-miR-30a-3p	158.992	298.755	298.726	263.693	352.202	198.696	173.929	185.846	173.834	371.707	163.282	152.856	140.479	1278.06	-1.23339	0.477987	-2.58038	0.00986908	0.10942
hsa-miR-30b-5p	173.886	254.24	349.635	157.344	403.477	123.711	127.413	208.258	183.098	413.265	200.526	47.331	109.112	1232.47	-1.28737	0.618509	-2.0814	0.0373972	0.223905
hsa-miR-30c-5p	150.428	218.258	218.851	125.527	285.545	170.813	158.939	109.878	147.874	336.884	201.376	119.75	145.239	1047.4	-1.2369	0.498705	-2.48023	0.0131298	0.129711
hsa-miR-30e-3p	217.823	386.861	466.96	280.692	405.952	210.336	156.56	181.335	246.342	614.895	187.356	108.111	179.535	1614.93	-1.31193	0.540511	-2.4272	0.015216	0.136302
hsa-miR-320c	53.618	22.617	52.08	56.226	9.459	60.637	108.14	109.587	67.018	15.007	59.478	364.941	262.407	419.966	2.13246	0.65631	3.24917	0.00115743	0.034422
hsa-miR-320d	43.565	20.664	42.424	51.867	7.426	40.335	103.739	90.958	45.288	11.736	43.617	211.05	235.19	337.254	2.06379	0.69477	2.97046	0.0029735	0.05527
hsa-miR-335-5p	44.309	139.097	217.388	117.681	356.446	71.465	50.085	54.721	126.831	173.348	52.964	56.383	86.411	687.006	-1.54471	0.583345	-2.64803	0.0080962	0.0994082
hsa-miR-339-5p	172.769	574.482	380.941	699.55	1196.02	190.033	215.091	168.382	210.088	669.15	207.182	193.204	207.607	2258.96	-2.27882	0.552168	-4.12703	3.67476e-05	0.00390312
hsa-miR-382-5p	714.163	287.241	158.579	306.843	1225.55	96.37	101.716	319.009	115.165	140.833	132.551	261.485	95.321	1704.17	-1.5605	0.742331	-2.10216	0.0355393	0.218376
hsa-miR-423-3p	69.257	133.751	48.861	148.627	217.474	96.099	94.697	65.927	89.891	78.882	77.463	164.236	76.891	565.786	-1.38484	0.459686	-3.01259	0.00259032	0.0519425
hsa-miR-423-5p	5548.35	3566.66	1809.33	4193.81	9052.85	2102.55	2377.54	1938.36	2605.34	5168.69	7212.72	20563.4	7565.01	26402.3	-1.16314	0.549109	-2.11824	0.034155	0.213518
hsa-miR-425-3p	25.32	139.097	98.015	119.861	318.785	44.124	21.89	41.331	49.863	77.728	19.684	203.549	54.312	504.104	-2.19858	0.62638	-3.50998	0.000448136	0.0195994
hsa-miR-425-5p	326.921	575.305	412.54	264.565	394.99	278.823	282.188	462.796	148.56	679.732	320.474	213.119	294.628	2072.62	-1.21569	0.54596	-2.2267	0.0259671	0.184751
hsa-miR-432-5p	382.401	631.848	260.105	599.303	3651.53	77.421	88.868	436.163	145.472	407.878	115.699	216.481	74.694	3307.42	-3.13299	0.775369	-4.04065	5.3304e-05	0.0044035
hsa-miR-451a	605.437	1171.68	1351.73	920.966	455.193	385.48	387.354	700.743	644.331	2138.86	862.575	631.598	966.756	4793.03	-1.12365	0.565331	-1.9876	0.0468558	0.258412
hsa-miR-584-5p	265.856	460.881	265.372	320.791	514.247	173.52	148.708	224.121	130.605	331.882	99.414	278.038	367.004	1546.89	-1.35735	0.468841	-2.89512	0.00379018	0.0647816
hsa-miR-625-3p	26.064	114.424	115.862	54.482	309.768	101.784	77.685	39.294	107.617	117.169	11.612	101.904	63.1	551.01	-1.63263	0.666896	-2.4481	0.0143612	0.131013
hsa-miR-660-5p	60.693	118.639	81.045	56.661	91.852	70.112	43.185	90.813	34.767	161.035	116.974	361.061	66.517	511.208	-1.2979	0.526837	-2.46357	0.0137562	0.129711
hsa-miR-664a-5p	103.513	141.462	112.937	175.214	312.243	43.583	98.028	65.636	138.381	116.207	79.587	205.877	121.317	703.719	-1.4028	0.474151	-2.95856	0.00309078	0.0560736
hsa-miR-744-5p	116.917	607.792	133.125	230.132	884.484	180.558	123.606	99.545	178.981	328.803	97.573	356.147	123.88	1577.64	-2.57707	0.469916	-5.48412	4.15541e-08	2.0597e-05
hsa-miR-7847-3p	317.613	16.86	122.007	49.688	24.311	20.573	29.742	68.255	7.434	14.622	130.427	2483.46	138.16	782.774	2.08865	0.983796	2.12305	0.0337495	0.212651
hsa-miR-92a-3p	459.477	658.784	121.421	347.378	591.866	535.449	527.139	253.519	364.709	712.824	481.348	322.524	258.99	2501.43	-1.4107	0.594619	-2.37245	0.0176705	0.143585
hsa-miR-941	32.767	122.854	56.176	30.074	62.502	29.777	34.857	9.751	34.081	10.967	15.719	108.111	35.516	250.111	-1.6042	0.718327	-2.23324	0.0255333	0.182539
hsa-miR-99b-5p	490.754	614.166	526.062	642.017	1144.57	413.904	724.386	473.42	448.081	789.205	535.304	578.06	364.44	3316.82	-1.30642	0.462016	-2.82765	0.00468916	0.0696064
