# Supplementary material for: Plasma-Derived Exosomal SncRNA as a Promising Diagnostic Biomarker for Early Detection of HBV-Related Acute-on-Chronic Liver Failure
Source: Front Cell Infect Microbiol. 2022 Jul 7;12:923300. doi: 10.3389/fcimb.2022.923300 (PMC9301338; doi:10.3389/fcimb.2022.923300)
Supplement: Supplementary file 4 [file Table_3.xlsx]

## Sheet: H vs N
Table S3: Using miRanda and TargetScan softwares to predicte miRNA potential targets.
ensemble_id	miRNA	Target	Score	Energy_KcalMol	Query_Start	Query_End	Subject_Start	Subject_End	Aln_len	Subject_Identity	Query_Identity	a_Gene_ID	miRNA_family_ID	species_ID	MSA_start	MSA_end	UTR_start	UTR_end	Group_num	Site_type	miRNA in this species	Group_type	Species_in_this_group	Species_in_this_group_with_this_site_type	ORF_overlap	gene_name	gene_type
ENSG00000003989	hsa-miR-425-5p	ENSG00000003989|ENST00000004531	157	-16.35	2	22	3274	3296	20	0.7	0.7	ENSG00000003989|ENST00000004531	hsa-miR-425-5p	0	47	52	47	52	8	6mer	x	6mer	0		0	SLC7A2	protein_coding
ENSG00000001630	hsa-miR-335-5p	ENSG00000001630|ENST00000003100	149	-10.37	2	14	308	330	12	0.8333	0.8333	ENSG00000001630|ENST00000003100	hsa-miR-335-5p	0	29	34	29	34	9	6mer	x	6mer	0		0	CYP51A1	protein_coding
ENSG00000004799	hsa-miR-27a-3p	ENSG00000004799|ENST00000005178	157	-15.85	2	18	1867	1887	16	0.75	0.8125	ENSG00000004799|ENST00000005178	hsa-miR-27a-3p	0	51	57	51	57	10	7mer-1a	x	7mer-1a	0		0	PDK4	protein_coding
ENSG00000004799	hsa-miR-27b-3p	ENSG00000004799|ENST00000005178	157	-15.85	2	18	1867	1887	16	0.75	0.8125	ENSG00000004799|ENST00000005178	hsa-miR-27b-3p	0	51	57	51	57	11	7mer-1a	x	7mer-1a	0		0	PDK4	protein_coding
ENSG00000007376	hsa-miR-128-3p	ENSG00000007376|ENST00000007264	146	-16.62	2	15	728	748	13	0.7692	0.7692	ENSG00000007376|ENST00000007264	hsa-miR-128-3p	0	41	46	41	46	34	6mer	x	6mer	0		0	RPUSD1	protein_coding
ENSG00000006625	hsa-miR-181a-5p	ENSG00000006625|ENST00000005374	142	-12.31	2	18	297	317	16	0.6875	0.75	ENSG00000006625|ENST00000005374	hsa-miR-181a-5p	0	34	39	34	39	41	6mer	x	6mer	0		0	GGCT	protein_coding
ENSG00000006625	hsa-miR-181b-5p	ENSG00000006625|ENST00000005374	158	-15.13	2	18	297	317	16	0.8125	0.875	ENSG00000006625|ENST00000005374	hsa-miR-181b-5p	0	34	39	34	39	42	6mer	x	6mer	0		0	GGCT	protein_coding
ENSG00000012963	hsa-miR-339-5p	ENSG00000012963|ENST00000013070	147	-18.68	2	12	623	645	10	0.9	0.9	ENSG00000012963|ENST00000013070	hsa-miR-339-5p	0	16	21	16	21	51	6mer	x	6mer	0		0	UBR7	protein_coding
ENSG00000008282	hsa-miR-15a-5p	ENSG00000008282|ENST00000011473	142	-11.67	2	11	114	135	9	0.8889	0.8889	ENSG00000008282|ENST00000011473	hsa-miR-15a-5p	0	41	47	41	47	52	7mer-m8	x	7mer-m8	0		0	SYPL1	protein_coding
ENSG00000008282	hsa-miR-15b-5p	ENSG00000008282|ENST00000011473	143	-11.64	2	21	118	135	19	0.6842	0.6842	ENSG00000008282|ENST00000011473	hsa-miR-15b-5p	0	41	47	41	47	53	7mer-m8	x	7mer-m8	0		0	SYPL1	protein_coding
ENSG00000005882	hsa-miR-24-3p	ENSG00000005882|ENST00000007708	145	-18.2	2	21	669	688	19	0.6842	0.6842	ENSG00000005882|ENST00000007708	hsa-miR-24-3p	0	20	26	20	26	73	7mer-m8	x	7mer-m8	0		0	PDK2	protein_coding
ENSG00000015532	hsa-miR-29a-3p	ENSG00000015532|ENST00000017003	146	-18.61	2	20	470	495	22	0.5909	0.7273	ENSG00000015532|ENST00000017003	hsa-miR-29a-3p	0	34	40	34	40	74	7mer-m8	x	7mer-m8	0		0	XYLT2	protein_coding
ENSG00000015532	hsa-miR-29b-3p	ENSG00000015532|ENST00000017003	141	-19.36	2	10	473	495	8	0.875	1	ENSG00000015532|ENST00000017003	hsa-miR-29b-3p	0	34	40	34	40	75	7mer-m8	x	7mer-m8	0		0	XYLT2	protein_coding
ENSG00000015532	hsa-miR-29c-3p	ENSG00000015532|ENST00000017003	142	-18.71	2	20	470	495	22	0.5455	0.7273	ENSG00000015532|ENST00000017003	hsa-miR-29c-3p	0	34	40	34	40	76	7mer-m8	x	7mer-m8	0		0	XYLT2	protein_coding
ENSG00000054967	hsa-miR-151a-3p	ENSG00000054967|ENST00000064780	140	-10.01	2	9	1446	1466	7	1	1	ENSG00000054967|ENST00000064780	hsa-miR-151a-3p	0	50	55	50	55	88	6mer	x	6mer	0		0	RELT	protein_coding
ENSG00000023516	hsa-miR-150-5p	ENSG00000023516|ENST00000025301	151	-19.16	2	20	94	115	18	0.6667	0.7222	ENSG00000023516|ENST00000025301	hsa-miR-150-5p	0	54	59	54	59	93	6mer	x	6mer	0		0	AKAP11	protein_coding
ENSG00000011465	hsa-miR-224-5p	ENSG00000011465|ENST00000052754	154	-21.96	2	21	4905	4928	19	0.7368	0.7368	ENSG00000011465|ENST00000052754	hsa-miR-224-5p	0	43	48	43	48	94	6mer	x	6mer	0		0	DCN	protein_coding
ENSG00000052723	hsa-miR-150-5p	ENSG00000052723|ENST00000060969	146	-15.38	2	20	2879	2901	19	0.6842	0.6842	ENSG00000052723|ENST00000060969	hsa-miR-150-5p	0	50	55	50	55	100	6mer	x	6mer	0		0	SIKE1	protein_coding
ENSG00000017797	hsa-miR-30a-3p	ENSG00000017797|ENST00000019317	154	-19.3	2	20	1393	1418	22	0.6364	0.7727	ENSG00000017797|ENST00000019317	hsa-miR-30a-3p	0	54	60	54	60	117	7mer-1a	x	7mer-1a	0		0	RALBP1	protein_coding
ENSG00000017797	hsa-miR-30e-3p	ENSG00000017797|ENST00000019317	154	-19.05	2	20	1393	1418	22	0.6364	0.7727	ENSG00000017797|ENST00000019317	hsa-miR-30e-3p	0	54	60	54	60	118	7mer-1a	x	7mer-1a	0		0	RALBP1	protein_coding
ENSG00000054965	hsa-miR-150-5p	ENSG00000054965|ENST00000064778	140	-14.17	2	9	4047	4068	7	1	1	ENSG00000054965|ENST00000064778	hsa-miR-150-5p	0	37	42	37	42	120	6mer	x	6mer	0		0	FAM168A	protein_coding
ENSG00000013563	hsa-miR-361-3p	ENSG00000013563|ENST00000014935	144	-23.7	2	22	62	85	21	0.5714	0.7143	ENSG00000013563|ENST00000014935	hsa-miR-361-3p	0	18	24	18	24	122	7mer-m8	x	7mer-m8	0		0	DNASE1L1	protein_coding
ENSG00000065809	hsa-miR-744-5p	ENSG00000065809|ENST00000181796	143	-22.19	2	20	191	212	18	0.6111	0.6667	ENSG00000065809|ENST00000181796	hsa-miR-744-5p	0	38	44	38	44	123	7mer-m8	x	7mer-m8	0		0	FAM107B	protein_coding
ENSG00000004897	hsa-miR-150-5p	ENSG00000004897|ENST00000066544	150	-20.34	2	19	1696	1714	17	0.7647	0.7647	ENSG00000004897|ENST00000066544	hsa-miR-150-5p	0	21	27	21	27	129	7mer-m8	x	7mer-m8	0		0	CDC27	protein_coding
ENSG00000062725	hsa-miR-625-3p	ENSG00000062725|ENST00000083182	155	-10.83	2	16	1373	1394	14	0.7857	0.8571	ENSG00000062725|ENST00000083182	hsa-miR-625-3p	0	24	31	24	31	160	8mer-1a	x	8mer-1a	0		0	APPBP2	protein_coding
ENSG00000065883	hsa-miR-23a-3p	ENSG00000065883|ENST00000181839	155	-14.15	2	18	2840	2859	16	0.75	0.875	ENSG00000065883|ENST00000181839	hsa-miR-23a-3p	0	54	60	54	60	163	7mer-m8	x	7mer-m8	0		0	CDK13	protein_coding
ENSG00000065883	hsa-miR-23b-3p	ENSG00000065883|ENST00000181839	162	-15.74	2	21	2838	2859	19	0.7368	0.8421	ENSG00000065883|ENST00000181839	hsa-miR-23b-3p	0	54	60	54	60	164	7mer-m8	x	7mer-m8	0		0	CDK13	protein_coding
ENSG00000065883	hsa-miR-23c	ENSG00000065883|ENST00000181839	159	-16.18	2	21	2836	2859	21	0.6667	0.8095	ENSG00000065883|ENST00000181839	hsa-miR-23c	0	54	60	54	60	165	7mer-m8	x	7mer-m8	0		0	CDK13	protein_coding
ENSG00000059804	hsa-miR-128-3p	ENSG00000059804|ENST00000075120	151	-18.37	2	16	1349	1369	14	0.7857	0.7857	ENSG00000059804|ENST00000075120	hsa-miR-128-3p	0	27	34	27	34	184	8mer-1a	x	8mer-1a	0		0	SLC2A3	protein_coding
ENSG00000059804	hsa-miR-148a-3p	ENSG00000059804|ENST00000075120	156	-19.14	2	14	1461	1483	13	0.9231	0.9231	ENSG00000059804|ENST00000075120	hsa-miR-148a-3p	0	26	31	26	31	185	6mer	x	6mer	0		0	SLC2A3	protein_coding
ENSG00000059804	hsa-miR-148b-3p	ENSG00000059804|ENST00000075120	145	-13.3	2	16	1463	1483	14	0.7857	0.7857	ENSG00000059804|ENST00000075120	hsa-miR-148b-3p	0	26	31	26	31	186	6mer	x	6mer	0		0	SLC2A3	protein_coding
ENSG00000127241	hsa-miR-181a-5p	ENSG00000127241|ENST00000169293	143	-10.65	2	22	504	525	20	0.55	0.75	ENSG00000127241|ENST00000169293	hsa-miR-181a-5p	0	48	53	48	53	200	6mer	x	6mer	0		0	MASP1	protein_coding
ENSG00000127241	hsa-miR-181b-5p	ENSG00000127241|ENST00000169293	140	-10.02	2	9	503	525	7	1	1	ENSG00000127241|ENST00000169293	hsa-miR-181b-5p	0	48	53	48	53	201	6mer	x	6mer	0		0	MASP1	protein_coding
ENSG00000094916	hsa-miR-24-3p	ENSG00000094916|ENST00000209875	162	-24.45	2	15	5658	5679	13	0.9231	0.9231	ENSG00000094916|ENST00000209875	hsa-miR-24-3p	0	16	21	16	21	226	6mer	x	6mer	0		0	CBX5	protein_coding
ENSG00000091947	hsa-miR-27a-3p	ENSG00000091947|ENST00000206380	152	-19.65	2	17	414	434	15	0.6667	0.8667	ENSG00000091947|ENST00000206380	hsa-miR-27a-3p	0	50	55	50	55	239	6mer	x	6mer	0		0	TMEM101	protein_coding
ENSG00000091947	hsa-miR-27b-3p	ENSG00000091947|ENST00000206380	152	-17.83	2	17	414	434	15	0.6667	0.8667	ENSG00000091947|ENST00000206380	hsa-miR-27b-3p	0	50	55	50	55	240	6mer	x	6mer	0		0	TMEM101	protein_coding
ENSG00000096717	hsa-miR-150-5p	ENSG00000096717|ENST00000212015	140	-15.26	2	9	1059	1080	7	1	1	ENSG00000096717|ENST00000212015	hsa-miR-150-5p	0	24	30	24	30	284	7mer-1a	x	7mer-1a	0		0	SIRT1	protein_coding
ENSG00000099992	hsa-miR-361-3p	ENSG00000099992|ENST00000215790	158	-30.17	2	20	224	248	20	0.7	0.8	ENSG00000099992|ENST00000215790	hsa-miR-361-3p	0	38	45	38	45	297	8mer-1a	x	8mer-1a	0		0	TBC1D10A	protein_coding
ENSG00000066405	hsa-miR-128-3p	ENSG00000066405|ENST00000183605	143	-17.47	2	15	1445	1463	13	0.7692	0.8462	ENSG00000066405|ENST00000183605	hsa-miR-128-3p	0	49	54	49	54	314	6mer	x	6mer	0		0	CLDN18	protein_coding
ENSG00000066405	hsa-miR-27a-3p	ENSG00000066405|ENST00000183605	152	-15.47	2	16	537	555	14	0.8571	0.8571	ENSG00000066405|ENST00000183605	hsa-miR-27a-3p	0	43	49	43	49	316	7mer-m8	x	7mer-m8	0		0	CLDN18	protein_coding
ENSG00000066405	hsa-miR-27b-3p	ENSG00000066405|ENST00000183605	152	-14.29	2	16	537	555	14	0.8571	0.8571	ENSG00000066405|ENST00000183605	hsa-miR-27b-3p	0	43	49	43	49	317	7mer-m8	x	7mer-m8	0		0	CLDN18	protein_coding
ENSG00000075568	hsa-miR-126-5p	ENSG00000075568|ENST00000186436	140	-1.66	2	9	404	424	7	1	1	ENSG00000075568|ENST00000186436	hsa-miR-126-5p	0	45	50	45	50	318	6mer	x	6mer	0		0	TMEM131	protein_coding
ENSG00000092140	hsa-miR-30a-3p	ENSG00000092140|ENST00000206595	140	-14.87	2	9	3353	3374	7	1	1	ENSG00000092140|ENST00000206595	hsa-miR-30a-3p	0	32	37	32	37	342	6mer	x	6mer	0		0	G2E3	protein_coding
ENSG00000092140	hsa-miR-30e-3p	ENSG00000092140|ENST00000206595	141	-14.38	2	19	3348	3374	22	0.5909	0.6818	ENSG00000092140|ENST00000206595	hsa-miR-30e-3p	0	32	37	32	37	343	6mer	x	6mer	0		0	G2E3	protein_coding
ENSG00000243811	hsa-miR-150-5p	ENSG00000243811|ENST00000216099	146	-17.18	2	20	776	799	20	0.65	0.7	ENSG00000243811|ENST00000216099	hsa-miR-150-5p	0	42	47	42	47	347	6mer	x	6mer	0		0	APOBEC3D	protein_coding
ENSG00000167580	hsa-miR-320c	ENSG00000167580|ENST00000199280	150	-18.89	2	16	1169	1190	16	0.75	0.8125	ENSG00000167580|ENST00000199280	hsa-miR-320c	0	23	29	23	29	357	7mer-1a	x	7mer-1a	0		0	AQP2	protein_coding
ENSG00000167580	hsa-miR-320d	ENSG00000167580|ENST00000199280	150	-18.7	2	16	1170	1190	16	0.75	0.8125	ENSG00000167580|ENST00000199280	hsa-miR-320d	0	23	29	23	29	358	7mer-1a	x	7mer-1a	0		0	AQP2	protein_coding
ENSG00000082269	hsa-miR-320c	ENSG00000082269|ENST00000194672	149	-14.3	2	18	1316	1335	16	0.625	0.8125	ENSG00000082269|ENST00000194672	hsa-miR-320c	0	24	30	24	30	362	7mer-m8	x	7mer-m8	0		0	FAM135A	protein_coding
ENSG00000082269	hsa-miR-320d	ENSG00000082269|ENST00000194672	149	-14.3	2	18	1317	1335	16	0.625	0.8125	ENSG00000082269|ENST00000194672	hsa-miR-320d	0	24	30	24	30	363	7mer-m8	x	7mer-m8	0		0	FAM135A	protein_coding
ENSG00000100522	hsa-miR-150-5p	ENSG00000100522|ENST00000216410	140	-15.8	2	9	1481	1502	7	1	1	ENSG00000100522|ENST00000216410	hsa-miR-150-5p	0	36	42	36	42	386	7mer-1a	x	7mer-1a	0		0	GNPNAT1	protein_coding
ENSG00000100522	hsa-miR-664a-5p	ENSG00000100522|ENST00000216410	141	-12.73	2	10	1574	1597	8	0.875	1	ENSG00000100522|ENST00000216410	hsa-miR-664a-5p	0	21	26	21	26	387	6mer	x	6mer	0		0	GNPNAT1	protein_coding
ENSG00000100078	hsa-miR-130a-3p	ENSG00000100078|ENST00000215885	140	-13.08	2	9	616	637	7	1	1	ENSG00000100078|ENST00000215885	hsa-miR-130a-3p	0	18	23	18	23	394	6mer	x	6mer	0		0	PLA2G3	protein_coding
ENSG00000100281	hsa-miR-30a-3p	ENSG00000100281|ENST00000216106	154	-15.27	2	15	448	469	13	0.7692	0.9231	ENSG00000100281|ENST00000216106	hsa-miR-30a-3p	0	34	40	34	40	416	7mer-1a	x	7mer-1a	0		0	HMGXB4	protein_coding
ENSG00000100281	hsa-miR-30e-3p	ENSG00000100281|ENST00000216106	154	-13.6	2	15	448	469	13	0.7692	0.9231	ENSG00000100281|ENST00000216106	hsa-miR-30e-3p	0	34	40	34	40	417	7mer-1a	x	7mer-1a	0		0	HMGXB4	protein_coding
ENSG00000100348	hsa-miR-30a-3p	ENSG00000100348|ENST00000216185	140	-11.15	2	9	529	550	7	1	1	ENSG00000100348|ENST00000216185	hsa-miR-30a-3p	0	27	33	27	33	420	7mer-m8	x	7mer-m8	0		0	TXN2	protein_coding
ENSG00000100348	hsa-miR-30e-3p	ENSG00000100348|ENST00000216185	142	-12.24	2	19	529	550	17	0.5294	0.7647	ENSG00000100348|ENST00000216185	hsa-miR-30e-3p	0	27	33	27	33	421	7mer-m8	x	7mer-m8	0		0	TXN2	protein_coding
ENSG00000100380	hsa-miR-128-3p	ENSG00000100380|ENST00000216218	143	-13.53	2	18	625	644	16	0.6875	0.75	ENSG00000100380|ENST00000216218	hsa-miR-128-3p	0	27	33	27	33	424	7mer-m8	x	7mer-m8	0		0	ST13	protein_coding
ENSG00000100678	hsa-miR-21-5p	ENSG00000100678|ENST00000216568	154	-17.38	2	21	1632	1656	22	0.6818	0.7727	ENSG00000100678|ENST00000216568	hsa-miR-21-5p	0	50	56	50	56	435	7mer-m8	x	7mer-m8	0		0	SLC8A3	protein_coding
ENSG00000106477	hsa-miR-26a-5p	ENSG00000106477|ENST00000223208	156	-15.92	2	21	1504	1525	19	0.6316	0.7895	ENSG00000106477|ENST00000223208	hsa-miR-26a-5p	0	19	24	19	24	436	6mer	x	6mer	0		0	CEP41	protein_coding
ENSG00000108587	hsa-miR-23a-3p	ENSG00000108587|ENST00000225724	150	-12.79	2	19	2318	2335	17	0.7059	0.8235	ENSG00000108587|ENST00000225724	hsa-miR-23a-3p	0	38	43	38	43	468	6mer	x	6mer	0		0	GOSR1	protein_coding
ENSG00000108587	hsa-miR-23b-3p	ENSG00000108587|ENST00000225724	150	-12.89	2	19	2316	2335	17	0.7059	0.8235	ENSG00000108587|ENST00000225724	hsa-miR-23b-3p	0	38	43	38	43	469	6mer	x	6mer	0		0	GOSR1	protein_coding
ENSG00000108587	hsa-miR-23c	ENSG00000108587|ENST00000225724	150	-11.41	2	20	2313	2335	19	0.6316	0.7895	ENSG00000108587|ENST00000225724	hsa-miR-23c	0	38	43	38	43	470	6mer	x	6mer	0		0	GOSR1	protein_coding
ENSG00000111087	hsa-miR-361-3p	ENSG00000111087|ENST00000228682	152	-21.32	2	22	102	125	21	0.5714	0.8095	ENSG00000111087|ENST00000228682	hsa-miR-361-3p	0	41	47	41	47	475	7mer-1a	x	7mer-1a	0		0	GLI1	protein_coding
ENSG00000172264	hsa-miR-30a-3p	ENSG00000172264|ENST00000217246	140	-8.89	2	9	2813	2834	7	1	1	ENSG00000172264|ENST00000217246	hsa-miR-30a-3p	0	20	27	20	27	491	8mer-1a	x	8mer-1a	0		0	MACROD2	protein_coding
ENSG00000172264	hsa-miR-30e-3p	ENSG00000172264|ENST00000217246	141	-11.54	2	21	2805	2834	27	0.6296	0.6667	ENSG00000172264|ENST00000217246	hsa-miR-30e-3p	0	20	27	20	27	492	8mer-1a	x	8mer-1a	0		0	MACROD2	protein_coding
ENSG00000106305	hsa-miR-29a-3p	ENSG00000106305|ENST00000223029	163	-18.23	2	18	24	47	18	0.8333	0.8889	ENSG00000106305|ENST00000223029	hsa-miR-29a-3p	0	43	49	43	49	497	7mer-m8	x	7mer-m8	0		0	AIMP2	protein_coding
ENSG00000106305	hsa-miR-29b-3p	ENSG00000106305|ENST00000223029	168	-18.53	2	18	23	47	18	0.8333	0.8889	ENSG00000106305|ENST00000223029	hsa-miR-29b-3p	0	43	49	43	49	498	7mer-m8	x	7mer-m8	0		0	AIMP2	protein_coding
ENSG00000106305	hsa-miR-29c-3p	ENSG00000106305|ENST00000223029	168	-18.16	2	18	24	47	18	0.8333	0.8889	ENSG00000106305|ENST00000223029	hsa-miR-29c-3p	0	43	49	43	49	499	7mer-m8	x	7mer-m8	0		0	AIMP2	protein_coding
ENSG00000108443	hsa-miR-181a-5p	ENSG00000108443|ENST00000225577	143	-11.72	2	22	3582	3603	20	0.6	0.7	ENSG00000108443|ENST00000225577	hsa-miR-181a-5p	0	48	53	48	53	503	6mer	x	6mer	0		0	RPS6KB1	protein_coding
ENSG00000108443	hsa-miR-181b-5p	ENSG00000108443|ENST00000225577	156	-14.32	2	19	3582	3603	17	0.7647	0.8235	ENSG00000108443|ENST00000225577	hsa-miR-181b-5p	0	48	53	48	53	504	6mer	x	6mer	0		0	RPS6KB1	protein_coding
ENSG00000106299	hsa-miR-584-5p	ENSG00000106299|ENST00000223023	142	-15.22	2	11	942	963	9	0.8889	0.8889	ENSG00000106299|ENST00000223023	hsa-miR-584-5p	0	55	60	55	60	508	6mer	x	6mer	0		0	WASL	protein_coding
ENSG00000103404	hsa-miR-142-5p	ENSG00000103404|ENST00000219689	157	-8.38	2	20	1664	1687	21	0.7619	0.7619	ENSG00000103404|ENST00000219689	hsa-miR-142-5p	0	51	57	51	57	531	7mer-1a	x	7mer-1a	0		0	USP31	protein_coding
ENSG00000102962	hsa-miR-425-5p	ENSG00000102962|ENST00000219235	143	-11.12	2	13	2407	2430	12	0.8333	0.8333	ENSG00000102962|ENST00000219235	hsa-miR-425-5p	0	45	50	45	50	547	6mer	x	6mer	0		0	CCL22	protein_coding
ENSG00000256087	hsa-miR-150-5p	ENSG00000256087|ENST00000221315	140	-15.8	2	9	1009	1030	7	1	1	ENSG00000256087|ENST00000221315	hsa-miR-150-5p	0	35	40	35	40	611	6mer	x	6mer	0		0	ZNF432	protein_coding
ENSG00000110921	hsa-miR-361-3p	ENSG00000110921|ENST00000228510	162	-24.25	2	21	38	59	19	0.6842	0.8947	ENSG00000110921|ENST00000228510	hsa-miR-361-3p	0	39	45	39	45	617	7mer-1a	x	7mer-1a	0		0	MVK	protein_coding
ENSG00000076641	hsa-miR-142-5p	ENSG00000076641|ENST00000220597	140	-6.63	2	9	4059	4079	7	1	1	ENSG00000076641|ENST00000220597	hsa-miR-142-5p	0	23	28	23	28	621	6mer	x	6mer	0		0	PAG1	protein_coding
ENSG00000100652	hsa-miR-199a-3p	ENSG00000100652|ENST00000216540	152	-14.09	2	13	746	767	11	0.9091	0.9091	ENSG00000100652|ENST00000216540	hsa-miR-199a-3p	0	27	32	27	32	639	6mer	x	6mer	0		0	SLC10A1	protein_coding
ENSG00000100652	hsa-miR-199b-3p	ENSG00000100652|ENST00000216540	152	-14.09	2	13	746	767	11	0.9091	0.9091	ENSG00000100652|ENST00000216540	hsa-miR-199b-3p	0	27	32	27	32	640	6mer	x	6mer	0		0	SLC10A1	protein_coding
ENSG00000109944	hsa-miR-223-3p	ENSG00000109944|ENST00000227349	150	-9.36	2	17	3668	3688	15	0.8	0.8	ENSG00000109944|ENST00000227349	hsa-miR-223-3p	0	28	33	28	33	651	6mer	x	6mer	0		0	JHY	protein_coding
ENSG00000105612	hsa-miR-150-5p	ENSG00000105612|ENST00000222219	140	-15.8	2	9	321	342	7	1	1	ENSG00000105612|ENST00000222219	hsa-miR-150-5p	0	18	24	18	24	672	7mer-m8	x	7mer-m8	0		0	DNASE2	protein_coding
ENSG00000101292	hsa-miR-30a-3p	ENSG00000101292|ENST00000217270	152	-9.65	2	17	2710	2731	15	0.6667	0.8667	ENSG00000101292|ENST00000217270	hsa-miR-30a-3p	0	53	58	53	58	686	6mer	x	6mer	0		0	PROKR2	protein_coding
ENSG00000101292	hsa-miR-30e-3p	ENSG00000101292|ENST00000217270	156	-8.63	2	19	2711	2731	17	0.7059	0.8824	ENSG00000101292|ENST00000217270	hsa-miR-30e-3p	0	53	58	53	58	687	6mer	x	6mer	0		0	PROKR2	protein_coding
ENSG00000109272	hsa-miR-27a-3p	ENSG00000109272|ENST00000226524	144	-14.58	2	19	17	41	21	0.6667	0.7143	ENSG00000109272|ENST00000226524	hsa-miR-27a-3p	0	38	43	38	43	754	6mer	x	6mer	0		0	PF4V1	protein_coding
ENSG00000109272	hsa-miR-27b-3p	ENSG00000109272|ENST00000226524	144	-12.68	2	19	17	41	21	0.6667	0.7143	ENSG00000109272|ENST00000226524	hsa-miR-27b-3p	0	38	43	38	43	755	6mer	x	6mer	0		0	PF4V1	protein_coding
ENSG00000103550	hsa-miR-128-3p	ENSG00000103550|ENST00000219837	148	-16.23	2	17	3278	3298	15	0.6667	0.8	ENSG00000103550|ENST00000219837	hsa-miR-128-3p	0	40	46	40	46	761	7mer-m8	x	7mer-m8	0		0	KNOP1	protein_coding
ENSG00000105926	hsa-miR-425-5p	ENSG00000105926|ENST00000222644	140	-9.3	2	9	3460	3482	7	1	1	ENSG00000105926|ENST00000222644	hsa-miR-425-5p	0	37	42	37	42	781	6mer	x	6mer	0		0	MPP6	protein_coding
ENSG00000110218	hsa-miR-130a-3p	ENSG00000110218|ENST00000227638	148	-17.15	2	20	597	616	18	0.6667	0.7778	ENSG00000110218|ENST00000227638	hsa-miR-130a-3p	0	25	30	25	30	802	6mer	x	6mer	0		0	PANX1	protein_coding
ENSG00000105643	hsa-miR-155-5p	ENSG00000105643|ENST00000222250	146	-17.09	2	23	965	988	21	0.5238	0.7143	ENSG00000105643|ENST00000222250	hsa-miR-155-5p	0	42	49	42	49	806	8mer-1a	x	8mer-1a	0		0	ARRDC2	protein_coding
ENSG00000104687	hsa-miR-128-3p	ENSG00000104687|ENST00000221130	146	-15.02	2	20	625	646	19	0.6316	0.7368	ENSG00000104687|ENST00000221130	hsa-miR-128-3p	0	33	38	33	38	833	6mer	x	6mer	0		0	GSR	protein_coding
ENSG00000106366	hsa-miR-432-5p	ENSG00000106366|ENST00000223095	157	-24.21	2	22	136	157	21	0.7143	0.8095	ENSG00000106366|ENST00000223095	hsa-miR-432-5p	0	35	41	35	41	913	7mer-m8	x	7mer-m8	0		0	SERPINE1	protein_coding
ENSG00000105509	hsa-miR-151a-5p	ENSG00000105509|ENST00000222115	143	-17.46	2	16	233	253	14	0.7143	0.7143	ENSG00000105509|ENST00000222115	hsa-miR-151a-5p	0	29	34	29	34	915	6mer	x	6mer	0		0	HAS1	protein_coding
ENSG00000108256	hsa-miR-148a-3p	ENSG00000108256|ENST00000225388	149	-14.63	2	17	1279	1298	15	0.8	0.8	ENSG00000108256|ENST00000225388	hsa-miR-148a-3p	0	50	56	50	56	918	7mer-1a	x	7mer-1a	0		0	NUFIP2	protein_coding
ENSG00000108256	hsa-miR-148b-3p	ENSG00000108256|ENST00000225388	149	-14.63	2	17	1279	1298	15	0.8	0.8	ENSG00000108256|ENST00000225388	hsa-miR-148b-3p	0	50	56	50	56	919	7mer-1a	x	7mer-1a	0		0	NUFIP2	protein_coding
ENSG00000213977	hsa-miR-150-5p	ENSG00000213977|ENST00000225525	140	-12.82	2	9	309	330	7	1	1	ENSG00000213977|ENST00000225525	hsa-miR-150-5p	0	29	35	29	35	922	7mer-1a	x	7mer-1a	0		0	TAX1BP3	protein_coding
ENSG00000121053	hsa-miR-361-3p	ENSG00000121053|ENST00000225371	154	-22.73	2	19	140	162	17	0.6471	0.8235	ENSG00000121053|ENST00000225371	hsa-miR-361-3p	0	36	42	36	42	943	7mer-1a	x	7mer-1a	0		0	EPX	protein_coding
ENSG00000124209	hsa-miR-29a-3p	ENSG00000124209|ENST00000244040	150	-19.59	2	21	5667	5690	21	0.6667	0.7619	ENSG00000124209|ENST00000244040	hsa-miR-29a-3p	0	35	41	35	41	960	7mer-1a	x	7mer-1a	0		0	RAB22A	protein_coding
ENSG00000124209	hsa-miR-29b-3p	ENSG00000124209|ENST00000244040	143	-14.61	2	13	5667	5690	12	0.75	0.9167	ENSG00000124209|ENST00000244040	hsa-miR-29b-3p	0	35	41	35	41	961	7mer-1a	x	7mer-1a	0		0	RAB22A	protein_coding
ENSG00000124209	hsa-miR-29c-3p	ENSG00000124209|ENST00000244040	147	-16.99	2	21	5667	5690	21	0.619	0.7143	ENSG00000124209|ENST00000244040	hsa-miR-29c-3p	0	35	41	35	41	962	7mer-1a	x	7mer-1a	0		0	RAB22A	protein_coding
ENSG00000119242	hsa-miR-142-5p	ENSG00000119242|ENST00000238156	140	-5.61	2	9	617	637	7	1	1	ENSG00000119242|ENST00000238156	hsa-miR-142-5p	0	22	27	22	27	967	6mer	x	6mer	0		0	CCDC92	protein_coding
ENSG00000116205	hsa-miR-27a-3p	ENSG00000116205|ENST00000234827	150	-19.53	2	19	281	298	17	0.7059	0.8235	ENSG00000116205|ENST00000234827	hsa-miR-27a-3p	0	46	51	46	51	972	6mer	x	6mer	0		0	TCEANC2	protein_coding
ENSG00000116205	hsa-miR-27b-3p	ENSG00000116205|ENST00000234827	150	-17.44	2	19	281	298	17	0.7059	0.8235	ENSG00000116205|ENST00000234827	hsa-miR-27b-3p	0	46	51	46	51	973	6mer	x	6mer	0		0	TCEANC2	protein_coding
ENSG00000129009	hsa-miR-150-5p	ENSG00000129009|ENST00000249842	158	-21.46	2	20	508	530	19	0.6842	0.8421	ENSG00000129009|ENST00000249842	hsa-miR-150-5p	0	45	51	45	51	974	7mer-m8	x	7mer-m8	0		0	ISLR	protein_coding
ENSG00000128285	hsa-miR-24-3p	ENSG00000128285|ENST00000249016	155	-17.2	2	16	574	595	14	0.7857	0.8571	ENSG00000128285|ENST00000249016	hsa-miR-24-3p	0	48	53	48	53	1009	6mer	x	6mer	0		0	MCHR1	protein_coding
ENSG00000129003	hsa-miR-126-5p	ENSG00000129003|ENST00000249837	156	-13.13	2	18	1964	1985	17	0.7059	0.8824	ENSG00000129003|ENST00000249837	hsa-miR-126-5p	0	42	47	42	47	1028	6mer	x	6mer	0		0	VPS13C	protein_coding
ENSG00000125912	hsa-miR-664a-5p	ENSG00000125912|ENST00000246117	145	-16.62	2	10	1699	1722	8	1	1	ENSG00000125912|ENST00000246117	hsa-miR-664a-5p	0	52	57	52	57	1038	6mer	x	6mer	0		0	NCLN	protein_coding
ENSG00000128973	hsa-miR-134-5p	ENSG00000128973|ENST00000249806	149	-16.37	2	15	1119	1141	14	0.7857	0.8571	ENSG00000128973|ENST00000249806	hsa-miR-134-5p	0	15	20	15	20	1060	6mer	x	6mer	0		0	CLN6	protein_coding
ENSG00000131196	hsa-miR-223-3p	ENSG00000131196|ENST00000253506	142	-8.5	2	11	139	160	9	0.8889	0.8889	ENSG00000131196|ENST00000253506	hsa-miR-223-3p	0	36	42	36	42	1076	7mer-m8	x	7mer-m8	0		0	NFATC1	protein_coding
ENSG00000124831	hsa-miR-625-3p	ENSG00000124831|ENST00000244815	140	-8.91	2	9	1404	1425	7	1	1	ENSG00000124831|ENST00000244815	hsa-miR-625-3p	0	48	53	48	53	1092	6mer	x	6mer	0		0	LRRFIP1	protein_coding
ENSG00000124507	hsa-miR-15a-5p	ENSG00000124507|ENST00000244458	142	-12.5	2	17	1621	1644	17	0.7059	0.7647	ENSG00000124507|ENST00000244458	hsa-miR-15a-5p	0	42	48	42	48	1094	7mer-m8	x	7mer-m8	0		0	PACSIN1	protein_coding
ENSG00000124507	hsa-miR-15b-5p	ENSG00000124507|ENST00000244458	143	-12.53	2	17	1622	1644	16	0.6875	0.75	ENSG00000124507|ENST00000244458	hsa-miR-15b-5p	0	42	48	42	48	1095	7mer-m8	x	7mer-m8	0		0	PACSIN1	protein_coding
ENSG00000131127	hsa-miR-128-3p	ENSG00000131127|ENST00000240499	157	-21.23	2	18	10786	10806	16	0.75	0.8125	ENSG00000131127|ENST00000240499	hsa-miR-128-3p	0	32	38	32	38	1106	7mer-1a	x	7mer-1a	0		0	ZNF141	protein_coding
ENSG00000124613	hsa-miR-25-3p	ENSG00000124613|ENST00000244576	157	-25.27	2	19	1192	1215	19	0.6842	0.8421	ENSG00000124613|ENST00000244576	hsa-miR-25-3p	0	49	56	49	56	1116	8mer-1a	x	8mer-1a	0		0	ZNF391	protein_coding
ENSG00000124613	hsa-miR-92a-3p	ENSG00000124613|ENST00000244576	155	-26.92	2	21	1198	1215	19	0.7368	0.7895	ENSG00000124613|ENST00000244576	hsa-miR-92a-3p	0	49	56	49	56	1117	8mer-1a	x	8mer-1a	0		0	ZNF391	protein_coding
ENSG00000117280	hsa-miR-199a-3p	ENSG00000117280|ENST00000235932	152	-14.6	2	17	92	113	15	0.7333	0.8	ENSG00000117280|ENST00000235932	hsa-miR-199a-3p	0	36	41	36	41	1139	6mer	x	6mer	0		0	RAB29	protein_coding
ENSG00000117280	hsa-miR-199b-3p	ENSG00000117280|ENST00000235932	152	-14.6	2	17	92	113	15	0.7333	0.8	ENSG00000117280|ENST00000235932	hsa-miR-199b-3p	0	36	41	36	41	1140	6mer	x	6mer	0		0	RAB29	protein_coding
ENSG00000118200	hsa-miR-23a-3p	ENSG00000118200|ENST00000236925	146	-11.29	2	20	1797	1818	19	0.6316	0.7368	ENSG00000118200|ENST00000236925	hsa-miR-23a-3p	0	45	51	45	51	1144	7mer-m8	x	7mer-m8	0		0	CAMSAP2	protein_coding
ENSG00000118200	hsa-miR-23b-3p	ENSG00000118200|ENST00000236925	145	-11.21	2	19	1795	1818	18	0.6667	0.7222	ENSG00000118200|ENST00000236925	hsa-miR-23b-3p	0	45	51	45	51	1145	7mer-m8	x	7mer-m8	0		0	CAMSAP2	protein_coding
ENSG00000118200	hsa-miR-23c	ENSG00000118200|ENST00000236925	149	-11.55	2	19	1796	1818	18	0.7222	0.7222	ENSG00000118200|ENST00000236925	hsa-miR-23c	0	45	51	45	51	1146	7mer-m8	x	7mer-m8	0		0	CAMSAP2	protein_coding
ENSG00000123901	hsa-miR-30a-3p	ENSG00000123901|ENST00000243673	140	-10.09	2	9	1849	1870	7	1	1	ENSG00000123901|ENST00000243673	hsa-miR-30a-3p	0	40	46	40	46	1163	7mer-m8	x	7mer-m8	0		0	GPR83	protein_coding
ENSG00000123901	hsa-miR-30e-3p	ENSG00000123901|ENST00000243673	144	-10.88	2	21	1849	1870	19	0.5263	0.7368	ENSG00000123901|ENST00000243673	hsa-miR-30e-3p	0	40	46	40	46	1164	7mer-m8	x	7mer-m8	0		0	GPR83	protein_coding
ENSG00000137185	hsa-miR-126-5p	ENSG00000137185|ENST00000252207	140	-6	2	9	253	273	7	1	1	ENSG00000137185|ENST00000252207	hsa-miR-126-5p	0	36	41	36	41	1169	6mer	x	6mer	0		0	ZSCAN9	protein_coding
ENSG00000118579	hsa-miR-196a-5p	ENSG00000118579|ENST00000237380	158	-13.56	2	19	459	480	17	0.7059	0.8235	ENSG00000118579|ENST00000237380	hsa-miR-196a-5p	0	42	47	42	47	1193	6mer	x	6mer	0		0	MED28	protein_coding
ENSG00000118579	hsa-miR-196b-5p	ENSG00000118579|ENST00000237380	150	-13.29	2	19	459	480	17	0.6471	0.7647	ENSG00000118579|ENST00000237380	hsa-miR-196b-5p	0	42	47	42	47	1194	6mer	x	6mer	0		0	MED28	protein_coding
ENSG00000099822	hsa-miR-25-3p	ENSG00000099822|ENST00000251287	151	-19.25	2	12	377	398	10	0.9	1	ENSG00000099822|ENST00000251287	hsa-miR-25-3p	0	49	55	49	55	1219	7mer-1a	x	7mer-1a	0		0	HCN2	protein_coding
ENSG00000099822	hsa-miR-92a-3p	ENSG00000099822|ENST00000251287	151	-17.51	2	12	377	398	10	0.9	1	ENSG00000099822|ENST00000251287	hsa-miR-92a-3p	0	49	55	49	55	1220	7mer-1a	x	7mer-1a	0		0	HCN2	protein_coding
ENSG00000112685	hsa-miR-181a-5p	ENSG00000112685|ENST00000230449	160	-15.63	2	22	728	751	21	0.6667	0.8095	ENSG00000112685|ENST00000230449	hsa-miR-181a-5p	0	50	57	50	57	1313	8mer-1a	x	8mer-1a	0		0	EXOC2	protein_coding
ENSG00000112685	hsa-miR-181b-5p	ENSG00000112685|ENST00000230449	157	-14.24	2	20	1439	1460	18	0.7222	0.8333	ENSG00000112685|ENST00000230449	hsa-miR-181b-5p	0	50	57	50	57	1314	8mer-1a	x	8mer-1a	0		0	EXOC2	protein_coding
ENSG00000119638	hsa-miR-25-3p	ENSG00000119638|ENST00000238616	146	-18.31	2	16	1456	1478	15	0.7333	0.8	ENSG00000119638|ENST00000238616	hsa-miR-25-3p	0	21	26	21	26	1316	6mer	x	6mer	0		0	NEK9	protein_coding
ENSG00000119638	hsa-miR-92a-3p	ENSG00000119638|ENST00000238616	146	-19.27	2	15	1457	1478	13	0.7692	0.7692	ENSG00000119638|ENST00000238616	hsa-miR-92a-3p	0	21	26	21	26	1317	6mer	x	6mer	0		0	NEK9	protein_coding
ENSG00000127314	hsa-miR-224-5p	ENSG00000127314|ENST00000250559	157	-15.46	2	24	8872	8895	22	0.6364	0.7727	ENSG00000127314|ENST00000250559	hsa-miR-224-5p	0	21	27	21	27	1340	7mer-m8	x	7mer-m8	0		0	RAP1B	protein_coding
ENSG00000127314	hsa-miR-26a-5p	ENSG00000127314|ENST00000250559	148	-16.58	2	21	3036	3057	19	0.6316	0.6842	ENSG00000127314|ENST00000250559	hsa-miR-26a-5p	0	49	55	49	55	1341	7mer-m8	x	7mer-m8	0		0	RAP1B	protein_coding
ENSG00000128917	hsa-miR-7847-3p	ENSG00000128917|ENST00000249749	151	-18.82	2	17	346	367	16	0.75	0.8125	ENSG00000128917|ENST00000249749	hsa-miR-7847-3p	0	41	46	41	46	1344	6mer	x	6mer	0		0	DLL4	protein_coding
ENSG00000115271	hsa-miR-27a-3p	ENSG00000115271|ENST00000233612	152	-16.58	2	13	16	36	11	0.9091	0.9091	ENSG00000115271|ENST00000233612	hsa-miR-27a-3p	0	17	22	17	22	1361	6mer	x	6mer	0		0	GCA	protein_coding
ENSG00000115271	hsa-miR-27b-3p	ENSG00000115271|ENST00000233612	152	-17.53	2	13	16	36	11	0.9091	0.9091	ENSG00000115271|ENST00000233612	hsa-miR-27b-3p	0	17	22	17	22	1362	6mer	x	6mer	0		0	GCA	protein_coding
ENSG00000112592	hsa-miR-27a-3p	ENSG00000112592|ENST00000230354	143	-17.96	2	12	196	216	10	0.8	0.9	ENSG00000112592|ENST00000230354	hsa-miR-27a-3p	0	41	46	41	46	1385	6mer	x	6mer	0		0	TBP	protein_coding
ENSG00000112592	hsa-miR-27b-3p	ENSG00000112592|ENST00000230354	143	-16.44	2	12	196	216	10	0.8	0.9	ENSG00000112592|ENST00000230354	hsa-miR-27b-3p	0	41	46	41	46	1386	6mer	x	6mer	0		0	TBP	protein_coding
ENSG00000105472	hsa-miR-335-5p	ENSG00000105472|ENST00000250340	146	-14.71	2	19	130	152	17	0.6471	0.7059	ENSG00000105472|ENST00000250340	hsa-miR-335-5p	0	45	50	45	50	1389	6mer	x	6mer	0		0	CLEC11A	protein_coding
ENSG00000130287	hsa-miR-24-3p	ENSG00000130287|ENST00000252575	157	-18.67	2	16	1361	1381	14	0.8571	0.9286	ENSG00000130287|ENST00000252575	hsa-miR-24-3p	0	24	30	24	30	1399	7mer-m8	x	7mer-m8	0		0	NCAN	protein_coding
ENSG00000123307	hsa-miR-15a-5p	ENSG00000123307|ENST00000242994	154	-19.29	2	21	925	945	19	0.6842	0.7895	ENSG00000123307|ENST00000242994	hsa-miR-15a-5p	0	20	26	20	26	1403	7mer-m8	x	7mer-m8	0		0	NEUROD4	protein_coding
ENSG00000123307	hsa-miR-15b-5p	ENSG00000123307|ENST00000242994	158	-19.97	2	21	925	945	19	0.7368	0.7895	ENSG00000123307|ENST00000242994	hsa-miR-15b-5p	0	20	26	20	26	1404	7mer-m8	x	7mer-m8	0		0	NEUROD4	protein_coding
ENSG00000198342	hsa-miR-128-3p	ENSG00000198342|ENST00000242804	142	-13.53	2	11	3551	3571	9	0.8889	0.8889	ENSG00000198342|ENST00000242804	hsa-miR-128-3p	0	44	50	44	50	1405	7mer-1a	x	7mer-1a	0		0	ZNF442	protein_coding
ENSG00000198342	hsa-miR-26a-5p	ENSG00000198342|ENST00000242804	147	-14.96	2	13	1285	1308	13	0.8462	0.8462	ENSG00000198342|ENST00000242804	hsa-miR-26a-5p	0	28	33	28	33	1407	6mer	x	6mer	0		0	ZNF442	protein_coding
ENSG00000198342	hsa-miR-30a-3p	ENSG00000198342|ENST00000242804	140	-9.31	2	9	2759	2780	7	1	1	ENSG00000198342|ENST00000242804	hsa-miR-30a-3p	0	15	22	15	22	1410	8mer-1a	x	8mer-1a	0		0	ZNF442	protein_coding
ENSG00000198342	hsa-miR-30e-3p	ENSG00000198342|ENST00000242804	140	-9.31	2	9	2759	2780	7	1	1	ENSG00000198342|ENST00000242804	hsa-miR-30e-3p	0	15	22	15	22	1411	8mer-1a	x	8mer-1a	0		0	ZNF442	protein_coding
ENSG00000126803	hsa-miR-130a-3p	ENSG00000126803|ENST00000247207	140	-8.06	2	9	1	10	7	1	1	ENSG00000126803|ENST00000247207	hsa-miR-130a-3p	0	25	30	25	30	1422	6mer	x	6mer	0		0	HSPA2	protein_coding
ENSG00000130943	hsa-miR-29a-3p	ENSG00000130943|ENST00000253255	156	-18.49	2	18	549	572	18	0.7778	0.7778	ENSG00000130943|ENST00000253255	hsa-miR-29a-3p	0	42	48	42	48	1428	7mer-1a	x	7mer-1a	0		0	PKDREJ	protein_coding
ENSG00000130943	hsa-miR-29b-3p	ENSG00000130943|ENST00000253255	152	-16.73	2	18	548	572	18	0.7222	0.7778	ENSG00000130943|ENST00000253255	hsa-miR-29b-3p	0	42	48	42	48	1429	7mer-1a	x	7mer-1a	0		0	PKDREJ	protein_coding
ENSG00000130943	hsa-miR-29c-3p	ENSG00000130943|ENST00000253255	152	-16.27	2	18	549	572	18	0.7222	0.7778	ENSG00000130943|ENST00000253255	hsa-miR-29c-3p	0	42	48	42	48	1430	7mer-1a	x	7mer-1a	0		0	PKDREJ	protein_coding
ENSG00000124092	hsa-miR-126-5p	ENSG00000124092|ENST00000243914	140	-2.58	2	9	456	476	7	1	1	ENSG00000124092|ENST00000243914	hsa-miR-126-5p	0	26	32	26	32	1453	7mer-1a	x	7mer-1a	0		0	CTCFL	protein_coding
ENSG00000169955	hsa-miR-361-3p	ENSG00000169955|ENST00000252799	147	-29.59	2	22	446	470	22	0.5455	0.8182	ENSG00000169955|ENST00000252799	hsa-miR-361-3p	0	45	50	45	50	1459	6mer	x	6mer	0		0	ZNF747	protein_coding
ENSG00000113532	hsa-miR-142-5p	ENSG00000113532|ENST00000231461	166	-11.99	2	19	4186	4206	17	0.8235	0.8235	ENSG00000113532|ENST00000231461	hsa-miR-142-5p	0	16	21	16	21	1493	6mer	x	6mer	0		0	ST8SIA4	protein_coding
ENSG00000132510	hsa-miR-30a-3p	ENSG00000132510|ENST00000254846	146	-7.82	2	20	854	876	19	0.6316	0.7368	ENSG00000132510|ENST00000254846	hsa-miR-30a-3p	0	24	31	24	31	1503	8mer-1a	x	8mer-1a	0		0	KDM6B	protein_coding
ENSG00000132510	hsa-miR-30e-3p	ENSG00000132510|ENST00000254846	146	-8.07	2	20	854	876	19	0.6316	0.7368	ENSG00000132510|ENST00000254846	hsa-miR-30e-3p	0	24	31	24	31	1504	8mer-1a	x	8mer-1a	0		0	KDM6B	protein_coding
ENSG00000115084	hsa-miR-27a-3p	ENSG00000115084|ENST00000245680	149	-14.34	2	15	7836	7857	14	0.7857	0.8571	ENSG00000115084|ENST00000245680	hsa-miR-27a-3p	0	19	25	19	25	1509	7mer-1a	x	7mer-1a	0		0	SLC35F5	protein_coding
ENSG00000115084	hsa-miR-27b-3p	ENSG00000115084|ENST00000245680	149	-15.02	2	15	7836	7857	14	0.7857	0.8571	ENSG00000115084|ENST00000245680	hsa-miR-27b-3p	0	19	25	19	25	1510	7mer-1a	x	7mer-1a	0		0	SLC35F5	protein_coding
ENSG00000115942	hsa-miR-23a-3p	ENSG00000115942|ENST00000234296	142	-9.89	2	20	1917	1939	20	0.6	0.7	ENSG00000115942|ENST00000234296	hsa-miR-23a-3p	0	21	26	21	26	1514	6mer	x	6mer	0		0	ORC2	protein_coding
ENSG00000115942	hsa-miR-23b-3p	ENSG00000115942|ENST00000234296	140	-10.14	2	9	1917	1939	7	1	1	ENSG00000115942|ENST00000234296	hsa-miR-23b-3p	0	21	26	21	26	1515	6mer	x	6mer	0		0	ORC2	protein_coding
ENSG00000115942	hsa-miR-23c	ENSG00000115942|ENST00000234296	140	-10.29	2	9	1918	1939	7	1	1	ENSG00000115942|ENST00000234296	hsa-miR-23c	0	21	26	21	26	1516	6mer	x	6mer	0		0	ORC2	protein_coding
ENSG00000197562	hsa-miR-339-5p	ENSG00000197562|ENST00000248139	147	-27.25	2	13	498	522	13	0.8462	0.8462	ENSG00000197562|ENST00000248139	hsa-miR-339-5p	0	47	52	47	52	1522	6mer	x	6mer	0		0	RAB40C	protein_coding
ENSG00000127022	hsa-miR-425-5p	ENSG00000127022|ENST00000247461	147	-12.77	2	12	1277	1299	10	0.8	1	ENSG00000127022|ENST00000247461	hsa-miR-425-5p	0	24	29	24	29	1531	6mer	x	6mer	0		0	CANX	protein_coding
ENSG00000116095	hsa-miR-196a-5p	ENSG00000116095|ENST00000234453	140	-13.24	2	9	5438	5459	7	1	1	ENSG00000116095|ENST00000234453	hsa-miR-196a-5p	0	49	55	49	55	1533	7mer-1a	x	7mer-1a	0		0	PLEKHA3	protein_coding
ENSG00000116095	hsa-miR-196b-5p	ENSG00000116095|ENST00000234453	140	-13.03	2	9	5438	5459	7	1	1	ENSG00000116095|ENST00000234453	hsa-miR-196b-5p	0	49	55	49	55	1534	7mer-1a	x	7mer-1a	0		0	PLEKHA3	protein_coding
ENSG00000100056	hsa-miR-15a-5p	ENSG00000100056|ENST00000252137	156	-19.3	2	17	713	734	15	0.8	0.8	ENSG00000100056|ENST00000252137	hsa-miR-15a-5p	0	46	52	46	52	1545	7mer-m8	x	7mer-m8	0		0	ESS2	protein_coding
ENSG00000100056	hsa-miR-15b-5p	ENSG00000100056|ENST00000252137	156	-16.6	2	17	713	734	15	0.8	0.8	ENSG00000100056|ENST00000252137	hsa-miR-15b-5p	0	46	52	46	52	1546	7mer-m8	x	7mer-m8	0		0	ESS2	protein_coding
ENSG00000103184	hsa-miR-181a-5p	ENSG00000103184|ENST00000251170	168	-18.84	2	21	4128	4150	19	0.7895	0.7895	ENSG00000103184|ENST00000251170	hsa-miR-181a-5p	0	31	38	31	38	1555	8mer-1a	x	8mer-1a	0		0	SEC14L5	protein_coding
ENSG00000103184	hsa-miR-181b-5p	ENSG00000103184|ENST00000251170	165	-24.48	2	22	4128	4150	20	0.75	0.75	ENSG00000103184|ENST00000251170	hsa-miR-181b-5p	0	31	38	31	38	1556	8mer-1a	x	8mer-1a	0		0	SEC14L5	protein_coding
ENSG00000127947	hsa-miR-28-3p	ENSG00000127947|ENST00000248594	145	-11.69	2	16	612	632	14	0.7143	0.8571	ENSG00000127947|ENST00000248594	hsa-miR-28-3p	0	44	50	44	50	1567	7mer-1a	x	7mer-1a	0		0	PTPN12	protein_coding
ENSG00000213047	hsa-miR-126-5p	ENSG00000213047|ENST00000235453	148	-4.24	2	18	531	554	19	0.6842	0.7368	ENSG00000213047|ENST00000235453	hsa-miR-126-5p	0	21	26	21	26	1571	6mer	x	6mer	0		0	DENND1B	protein_coding
ENSG00000204604	hsa-miR-142-3p	ENSG00000204604|ENST00000243639	165	-22.52	2	18	2878	2900	16	0.8125	0.875	ENSG00000204604|ENST00000243639	hsa-miR-142-3p	0	24	29	24	29	1574	6mer	x	6mer	0		0	ZNF468	protein_coding
ENSG00000059122	hsa-miR-148a-3p	ENSG00000059122|ENST00000253928	140	-12.5	2	9	987	1008	7	1	1	ENSG00000059122|ENST00000253928	hsa-miR-148a-3p	0	46	52	46	52	1577	7mer-1a	x	7mer-1a	0		0	FLYWCH1	protein_coding
ENSG00000059122	hsa-miR-148b-3p	ENSG00000059122|ENST00000253928	145	-13.28	2	10	987	1008	8	1	1	ENSG00000059122|ENST00000253928	hsa-miR-148b-3p	0	46	52	46	52	1578	7mer-1a	x	7mer-1a	0		0	FLYWCH1	protein_coding
ENSG00000101452	hsa-miR-126-5p	ENSG00000101452|ENST00000252011	141	-4.44	2	19	1118	1140	19	0.5789	0.7368	ENSG00000101452|ENST00000252011	hsa-miR-126-5p	0	49	56	49	56	1589	8mer-1a	x	8mer-1a	0		0	DHX35	protein_coding
ENSG00000149639	hsa-miR-23a-3p	ENSG00000149639|ENST00000237536	158	-15.38	2	19	2691	2711	17	0.7059	0.8235	ENSG00000149639|ENST00000237536	hsa-miR-23a-3p	0	31	37	31	37	1591	7mer-m8	x	7mer-m8	0		0	SOGA1	protein_coding
ENSG00000149639	hsa-miR-23b-3p	ENSG00000149639|ENST00000237536	163	-15.38	2	20	2689	2711	18	0.7222	0.8333	ENSG00000149639|ENST00000237536	hsa-miR-23b-3p	0	31	37	31	37	1592	7mer-m8	x	7mer-m8	0		0	SOGA1	protein_coding
ENSG00000149639	hsa-miR-23c	ENSG00000149639|ENST00000237536	159	-14.17	2	20	2690	2711	18	0.7222	0.7778	ENSG00000149639|ENST00000237536	hsa-miR-23c	0	31	37	31	37	1593	7mer-m8	x	7mer-m8	0		0	SOGA1	protein_coding
ENSG00000127561	hsa-miR-30a-5p	ENSG00000127561|ENST00000248121	158	-15	2	21	1066	1086	19	0.7368	0.7895	ENSG00000127561|ENST00000248121	hsa-miR-30a-5p	0	38	43	38	43	1599	6mer	x	6mer	0		0	SYNGR3	protein_coding
ENSG00000127561	hsa-miR-30b-5p	ENSG00000127561|ENST00000248121	158	-13.92	2	21	1066	1086	19	0.7368	0.7895	ENSG00000127561|ENST00000248121	hsa-miR-30b-5p	0	38	43	38	43	1600	6mer	x	6mer	0		0	SYNGR3	protein_coding
ENSG00000127561	hsa-miR-30c-5p	ENSG00000127561|ENST00000248121	155	-13.92	2	18	1065	1086	16	0.8125	0.8125	ENSG00000127561|ENST00000248121	hsa-miR-30c-5p	0	38	43	38	43	1601	6mer	x	6mer	0		0	SYNGR3	protein_coding
ENSG00000127561	hsa-miR-30d-5p	ENSG00000127561|ENST00000248121	150	-12.05	2	21	1066	1086	19	0.6842	0.7368	ENSG00000127561|ENST00000248121	hsa-miR-30d-5p	0	38	43	38	43	1602	6mer	x	6mer	0		0	SYNGR3	protein_coding
ENSG00000117868	hsa-miR-28-3p	ENSG00000117868|ENST00000251527	149	-16.13	2	21	1882	1907	23	0.6957	0.7391	ENSG00000117868|ENST00000251527	hsa-miR-28-3p	0	54	59	54	59	1606	6mer	x	6mer	0		0	ESYT2	protein_coding
ENSG00000108406	hsa-miR-126-5p	ENSG00000108406|ENST00000251241	152	-10.04	2	17	235	255	15	0.7333	0.8	ENSG00000108406|ENST00000251241	hsa-miR-126-5p	0	37	42	37	42	1609	6mer	x	6mer	0		0	DHX40	protein_coding
ENSG00000116544	hsa-miR-27a-3p	ENSG00000116544|ENST00000235180	152	-23.68	2	13	59	79	11	0.8182	1	ENSG00000116544|ENST00000235180	hsa-miR-27a-3p	0	23	28	23	28	1614	6mer	x	6mer	0		0	DLGAP3	protein_coding
ENSG00000116544	hsa-miR-27b-3p	ENSG00000116544|ENST00000235180	152	-22.03	2	13	59	79	11	0.8182	1	ENSG00000116544|ENST00000235180	hsa-miR-27b-3p	0	23	28	23	28	1615	6mer	x	6mer	0		0	DLGAP3	protein_coding
ENSG00000132485	hsa-miR-181a-5p	ENSG00000132485|ENST00000254821	141	-12.42	2	22	1408	1428	20	0.6	0.75	ENSG00000132485|ENST00000254821	hsa-miR-181a-5p	0	35	40	35	40	1616	6mer	x	6mer	0		0	ZRANB2	protein_coding
ENSG00000132485	hsa-miR-181b-5p	ENSG00000132485|ENST00000254821	146	-13.51	2	11	1406	1428	9	0.8889	1	ENSG00000132485|ENST00000254821	hsa-miR-181b-5p	0	35	40	35	40	1617	6mer	x	6mer	0		0	ZRANB2	protein_coding
ENSG00000121691	hsa-miR-425-5p	ENSG00000121691|ENST00000241052	140	-10.8	2	9	437	459	7	1	1	ENSG00000121691|ENST00000241052	hsa-miR-425-5p	0	47	52	47	52	1618	6mer	x	6mer	0		0	CAT	protein_coding
ENSG00000114854	hsa-miR-24-3p	ENSG00000114854|ENST00000232975	153	-18.42	2	21	76	95	19	0.7368	0.7368	ENSG00000114854|ENST00000232975	hsa-miR-24-3p	0	50	56	50	56	1679	7mer-1a	x	7mer-1a	0		0	TNNC1	protein_coding
ENSG00000231924	hsa-miR-126-5p	ENSG00000231924|ENST00000244296	146	-8.48	2	20	197	218	19	0.6316	0.7368	ENSG00000231924|ENST00000244296	hsa-miR-126-5p	0	37	42	37	42	1689	6mer	x	6mer	0		0	PSG1	protein_coding
ENSG00000116667	hsa-miR-134-5p	ENSG00000116667|ENST00000235307	148	-19.07	2	21	4200	4221	19	0.5789	0.7368	ENSG00000116667|ENST00000235307	hsa-miR-134-5p	0	52	57	52	57	1692	6mer	x	6mer	0		0	C1orf21	protein_coding
ENSG00000116667	hsa-miR-199a-5p	ENSG00000116667|ENST00000235307	160	-18.86	2	21	2280	2300	19	0.7895	0.8421	ENSG00000116667|ENST00000235307	hsa-miR-199a-5p	0	38	44	38	44	1693	7mer-1a	x	7mer-1a	0		0	C1orf21	protein_coding
ENSG00000113302	hsa-miR-320c	ENSG00000113302|ENST00000231228	152	-12.71	2	13	907	926	11	0.8182	1	ENSG00000113302|ENST00000231228	hsa-miR-320c	0	50	55	50	55	1700	6mer	x	6mer	0		0	IL12B	protein_coding
ENSG00000113302	hsa-miR-320d	ENSG00000113302|ENST00000231228	152	-12.71	2	13	908	926	11	0.8182	1	ENSG00000113302|ENST00000231228	hsa-miR-320d	0	50	55	50	55	1701	6mer	x	6mer	0		0	IL12B	protein_coding
ENSG00000006576	hsa-miR-150-5p	ENSG00000006576|ENST00000248550	152	-20.25	2	13	1990	2011	11	0.9091	0.9091	ENSG00000006576|ENST00000248550	hsa-miR-150-5p	0	25	31	25	31	1705	7mer-1a	x	7mer-1a	0		0	PHTF2	protein_coding
ENSG00000125810	hsa-miR-432-5p	ENSG00000125810|ENST00000246006	151	-17.76	2	18	1560	1584	18	0.7222	0.8333	ENSG00000125810|ENST00000246006	hsa-miR-432-5p	0	37	43	37	43	1722	7mer-1a	x	7mer-1a	0		0	CD93	protein_coding
ENSG00000117385	hsa-miR-339-5p	ENSG00000117385|ENST00000236040	166	-26.87	2	19	45	67	17	0.7647	0.8824	ENSG00000117385|ENST00000236040	hsa-miR-339-5p	0	19	25	19	25	1737	7mer-m8	x	7mer-m8	0		0	P3H1	protein_coding
ENSG00000126705	hsa-miR-148a-3p	ENSG00000126705|ENST00000247087	146	-15.15	2	13	366	386	11	0.9091	0.9091	ENSG00000126705|ENST00000247087	hsa-miR-148a-3p	0	37	44	37	44	1746	8mer-1a	x	8mer-1a	0		0	AHDC1	protein_coding
ENSG00000126705	hsa-miR-148b-3p	ENSG00000126705|ENST00000247087	146	-15.91	2	13	366	386	11	0.9091	0.9091	ENSG00000126705|ENST00000247087	hsa-miR-148b-3p	0	37	44	37	44	1747	8mer-1a	x	8mer-1a	0		0	AHDC1	protein_coding
ENSG00000125657	hsa-miR-30a-3p	ENSG00000125657|ENST00000245817	154	-16.37	2	21	486	506	19	0.6842	0.7895	ENSG00000125657|ENST00000245817	hsa-miR-30a-3p	0	40	45	40	45	1755	6mer	x	6mer	0		0	TNFSF9	protein_coding
ENSG00000125657	hsa-miR-30e-3p	ENSG00000125657|ENST00000245817	158	-16.78	2	21	486	506	19	0.7368	0.7895	ENSG00000125657|ENST00000245817	hsa-miR-30e-3p	0	40	45	40	45	1756	6mer	x	6mer	0		0	TNFSF9	protein_coding
ENSG00000114857	hsa-miR-128-3p	ENSG00000114857|ENST00000232978	142	-13.44	2	11	1133	1153	9	0.8889	0.8889	ENSG00000114857|ENST00000232978	hsa-miR-128-3p	0	42	47	42	47	1761	6mer	x	6mer	0		0	NKTR	protein_coding
ENSG00000130414	hsa-miR-30a-5p	ENSG00000130414|ENST00000252711	148	-13.23	2	21	2302	2321	19	0.7368	0.7368	ENSG00000130414|ENST00000252711	hsa-miR-30a-5p	0	15	22	15	22	1785	8mer-1a	x	8mer-1a	0		0	NDUFA10	protein_coding
ENSG00000130414	hsa-miR-30b-5p	ENSG00000130414|ENST00000252711	141	-11.77	2	10	2300	2321	8	0.875	1	ENSG00000130414|ENST00000252711	hsa-miR-30b-5p	0	15	22	15	22	1786	8mer-1a	x	8mer-1a	0		0	NDUFA10	protein_coding
ENSG00000130414	hsa-miR-30c-5p	ENSG00000130414|ENST00000252711	143	-11.77	2	20	2301	2321	18	0.7222	0.7222	ENSG00000130414|ENST00000252711	hsa-miR-30c-5p	0	15	22	15	22	1787	8mer-1a	x	8mer-1a	0		0	NDUFA10	protein_coding
ENSG00000130414	hsa-miR-30d-5p	ENSG00000130414|ENST00000252711	151	-13.72	2	21	2298	2321	21	0.6667	0.7143	ENSG00000130414|ENST00000252711	hsa-miR-30d-5p	0	15	22	15	22	1788	8mer-1a	x	8mer-1a	0		0	NDUFA10	protein_coding
ENSG00000131791	hsa-miR-126-5p	ENSG00000131791|ENST00000254101	162	-12.06	2	20	2621	2642	19	0.6842	0.8947	ENSG00000131791|ENST00000254101	hsa-miR-126-5p	0	50	55	50	55	1792	6mer	x	6mer	0		0	PRKAB2	protein_coding
ENSG00000123096	hsa-miR-142-3p	ENSG00000123096|ENST00000242729	161	-18.26	2	22	2052	2074	20	0.7	0.75	ENSG00000123096|ENST00000242729	hsa-miR-142-3p	0	34	39	34	39	1794	6mer	x	6mer	0		0	SSPN	protein_coding
ENSG00000123096	hsa-miR-30a-3p	ENSG00000123096|ENST00000242729	150	-18.78	2	19	2008	2027	17	0.7059	0.8824	ENSG00000123096|ENST00000242729	hsa-miR-30a-3p	0	25	30	25	30	1796	6mer	x	6mer	0		0	SSPN	protein_coding
ENSG00000123096	hsa-miR-30e-3p	ENSG00000123096|ENST00000242729	154	-18.44	2	19	2008	2027	17	0.7647	0.8824	ENSG00000123096|ENST00000242729	hsa-miR-30e-3p	0	25	30	25	30	1797	6mer	x	6mer	0		0	SSPN	protein_coding
ENSG00000126003	hsa-miR-7847-3p	ENSG00000126003|ENST00000246229	148	-16.81	2	17	1561	1581	15	0.7333	0.7333	ENSG00000126003|ENST00000246229	hsa-miR-7847-3p	0	26	31	26	31	1815	6mer	x	6mer	0		0	PLAGL2	protein_coding
ENSG00000129048	hsa-miR-126-5p	ENSG00000129048|ENST00000249887	140	-5.12	2	9	471	491	7	1	1	ENSG00000129048|ENST00000249887	hsa-miR-126-5p	0	29	35	29	35	1826	7mer-1a	x	7mer-1a	0		0	ACKR4	protein_coding
ENSG00000100722	hsa-miR-664a-5p	ENSG00000100722|ENST00000251038	148	-15.43	2	19	13840	13862	17	0.7059	0.7647	ENSG00000100722|ENST00000251038	hsa-miR-664a-5p	0	23	28	23	28	1832	6mer	x	6mer	0		0	ZC3H14	protein_coding
ENSG00000109805	hsa-miR-23a-3p	ENSG00000109805|ENST00000251496	141	-12.6	2	10	733	753	8	0.875	1	ENSG00000109805|ENST00000251496	hsa-miR-23a-3p	0	32	37	32	37	1862	6mer	x	6mer	0		0	NCAPG	protein_coding
ENSG00000109805	hsa-miR-23b-3p	ENSG00000109805|ENST00000251496	145	-14.28	2	20	724	753	25	0.6	0.72	ENSG00000109805|ENST00000251496	hsa-miR-23b-3p	0	32	37	32	37	1863	6mer	x	6mer	0		0	NCAPG	protein_coding
ENSG00000109805	hsa-miR-23c	ENSG00000109805|ENST00000251496	141	-11.72	2	10	732	753	8	0.875	1	ENSG00000109805|ENST00000251496	hsa-miR-23c	0	32	37	32	37	1864	6mer	x	6mer	0		0	NCAPG	protein_coding
ENSG00000128534	hsa-miR-425-5p	ENSG00000128534|ENST00000249299	143	-10.33	2	14	10198	10219	12	0.8333	0.8333	ENSG00000128534|ENST00000249299	hsa-miR-425-5p	0	25	30	25	30	1898	6mer	x	6mer	0		0	LSM8	protein_coding
ENSG00000123364	hsa-miR-7847-3p	ENSG00000123364|ENST00000243056	155	-22.54	2	20	178	198	18	0.7222	0.7222	ENSG00000123364|ENST00000243056	hsa-miR-7847-3p	0	38	44	38	44	1902	7mer-m8	x	7mer-m8	0		0	HOXC13	protein_coding
ENSG00000121743	hsa-miR-425-5p	ENSG00000121743|ENST00000241125	143	-13.52	2	12	522	544	10	0.8	0.9	ENSG00000121743|ENST00000241125	hsa-miR-425-5p	0	46	53	46	53	1911	8mer-1a	x	8mer-1a	0		0	GJA3	protein_coding
ENSG00000121743	hsa-miR-625-3p	ENSG00000121743|ENST00000241125	141	-9.69	2	15	2775	2798	15	0.7333	0.7333	ENSG00000121743|ENST00000241125	hsa-miR-625-3p	0	36	42	36	42	1912	7mer-m8	x	7mer-m8	0		0	GJA3	protein_coding
ENSG00000131016	hsa-miR-23a-3p	ENSG00000131016|ENST00000253332	144	-15.01	2	20	31	49	18	0.6667	0.7222	ENSG00000131016|ENST00000253332	hsa-miR-23a-3p	0	45	52	45	52	1926	8mer-1a	x	8mer-1a	0		0	AKAP12	protein_coding
ENSG00000131016	hsa-miR-23b-3p	ENSG00000131016|ENST00000253332	145	-12.25	2	21	29	49	19	0.6842	0.6842	ENSG00000131016|ENST00000253332	hsa-miR-23b-3p	0	45	52	45	52	1927	8mer-1a	x	8mer-1a	0		0	AKAP12	protein_coding
ENSG00000131016	hsa-miR-23c	ENSG00000131016|ENST00000253332	140	-9.47	2	9	28	49	7	1	1	ENSG00000131016|ENST00000253332	hsa-miR-23c	0	45	52	45	52	1928	8mer-1a	x	8mer-1a	0		0	AKAP12	protein_coding
ENSG00000241399	hsa-miR-382-5p	ENSG00000241399|ENST00000259053	155	-13.21	2	21	2042	2064	20	0.7	0.75	ENSG00000241399|ENST00000259053	hsa-miR-382-5p	0	49	54	49	54	1950	6mer	x	6mer	0		0	CD302	protein_coding
ENSG00000135945	hsa-miR-30a-5p	ENSG00000135945|ENST00000258428	156	-16.29	2	21	247	266	19	0.7895	0.7895	ENSG00000135945|ENST00000258428	hsa-miR-30a-5p	0	43	50	43	50	1987	8mer-1a	x	8mer-1a	0		0	REV1	protein_coding
ENSG00000135945	hsa-miR-30b-5p	ENSG00000135945|ENST00000258428	154	-13.44	2	18	247	266	16	0.8125	0.8125	ENSG00000135945|ENST00000258428	hsa-miR-30b-5p	0	43	50	43	50	1988	8mer-1a	x	8mer-1a	0		0	REV1	protein_coding
ENSG00000135945	hsa-miR-30c-5p	ENSG00000135945|ENST00000258428	158	-13.44	2	22	246	266	20	0.75	0.75	ENSG00000135945|ENST00000258428	hsa-miR-30c-5p	0	43	50	43	50	1989	8mer-1a	x	8mer-1a	0		0	REV1	protein_coding
ENSG00000135945	hsa-miR-30d-5p	ENSG00000135945|ENST00000258428	149	-14.24	2	21	247	266	19	0.6842	0.7368	ENSG00000135945|ENST00000258428	hsa-miR-30d-5p	0	43	50	43	50	1990	8mer-1a	x	8mer-1a	0		0	REV1	protein_coding
ENSG00000133935	hsa-miR-382-5p	ENSG00000133935|ENST00000256319	145	-10.98	2	10	611	632	8	1	1	ENSG00000133935|ENST00000256319	hsa-miR-382-5p	0	45	51	45	51	2015	7mer-m8	x	7mer-m8	0		0	ERG28	protein_coding
ENSG00000134061	hsa-miR-24-3p	ENSG00000134061|ENST00000256447	154	-22.19	2	16	2158	2181	16	0.8125	0.8125	ENSG00000134061|ENST00000256447	hsa-miR-24-3p	0	51	58	51	58	2042	8mer-1a	x	8mer-1a	0		0	CD180	protein_coding
ENSG00000147588	hsa-miR-339-5p	ENSG00000147588|ENST00000256103	142	-16.6	2	11	2253	2275	9	0.8889	0.8889	ENSG00000147588|ENST00000256103	hsa-miR-339-5p	0	25	32	25	32	2099	8mer-1a	x	8mer-1a	0		0	PMP2	protein_coding
ENSG00000160551	hsa-miR-221-3p	ENSG00000160551|ENST00000261716	148	-14.62	2	19	5681	5702	17	0.6471	0.8235	ENSG00000160551|ENST00000261716	hsa-miR-221-3p	0	26	32	26	32	2114	7mer-1a	x	7mer-1a	0		0	TAOK1	protein_coding
ENSG00000058056	hsa-miR-339-5p	ENSG00000058056|ENST00000263966	151	-18.58	2	22	3630	3654	22	0.6364	0.7727	ENSG00000058056|ENST00000263966	hsa-miR-339-5p	0	52	57	52	57	2116	6mer	x	6mer	0		0	USP13	protein_coding
ENSG00000084110	hsa-miR-29a-3p	ENSG00000084110|ENST00000261208	153	-16.08	2	21	1386	1405	19	0.6842	0.7895	ENSG00000084110|ENST00000261208	hsa-miR-29a-3p	0	21	27	21	27	2117	7mer-m8	x	7mer-m8	0		0	HAL	protein_coding
ENSG00000084110	hsa-miR-29b-3p	ENSG00000084110|ENST00000261208	162	-18.71	2	22	1385	1405	20	0.75	0.8	ENSG00000084110|ENST00000261208	hsa-miR-29b-3p	0	21	27	21	27	2118	7mer-m8	x	7mer-m8	0		0	HAL	protein_coding
ENSG00000084110	hsa-miR-29c-3p	ENSG00000084110|ENST00000261208	153	-16.08	2	21	1386	1405	19	0.6842	0.7895	ENSG00000084110|ENST00000261208	hsa-miR-29c-3p	0	21	27	21	27	2119	7mer-m8	x	7mer-m8	0		0	HAL	protein_coding
ENSG00000085491	hsa-miR-335-5p	ENSG00000085491|ENST00000264128	154	-13.94	2	22	659	684	23	0.7391	0.7391	ENSG00000085491|ENST00000264128	hsa-miR-335-5p	0	48	53	48	53	2122	6mer	x	6mer	0		0	SLC25A24	protein_coding
ENSG00000139737	hsa-miR-382-5p	ENSG00000139737|ENST00000267219	171	-26.34	2	21	493	515	20	0.75	0.9	ENSG00000139737|ENST00000267219	hsa-miR-382-5p	0	20	26	20	26	2137	7mer-m8	x	7mer-m8	0		0	SLAIN1	protein_coding
ENSG00000102780	hsa-miR-128-3p	ENSG00000102780|ENST00000261491	142	-11.92	2	11	4338	4358	9	0.8889	0.8889	ENSG00000102780|ENST00000261491	hsa-miR-128-3p	0	22	28	22	28	2141	7mer-1a	x	7mer-1a	0		0	DGKH	protein_coding
ENSG00000135801	hsa-miR-151a-3p	ENSG00000135801|ENST00000258281	140	-10.26	2	9	996	1016	7	1	1	ENSG00000135801|ENST00000258281	hsa-miR-151a-3p	0	31	36	31	36	2148	6mer	x	6mer	0		0	TAF5L	protein_coding
ENSG00000113396	hsa-miR-30a-3p	ENSG00000113396|ENST00000262462	151	-7.76	2	16	333	353	14	0.7143	0.8571	ENSG00000113396|ENST00000262462	hsa-miR-30a-3p	0	54	59	54	59	2163	6mer	x	6mer	0		0	SLC27A6	protein_coding
ENSG00000113396	hsa-miR-30e-3p	ENSG00000113396|ENST00000262462	152	-7.21	2	19	334	353	17	0.7059	0.8235	ENSG00000113396|ENST00000262462	hsa-miR-30e-3p	0	54	59	54	59	2164	6mer	x	6mer	0		0	SLC27A6	protein_coding
ENSG00000074590	hsa-miR-29a-3p	ENSG00000074590|ENST00000261402	156	-21.9	2	13	1232	1253	11	0.9091	1	ENSG00000074590|ENST00000261402	hsa-miR-29a-3p	0	29	35	29	35	2177	7mer-m8	x	7mer-m8	0		0	NUAK1	protein_coding
ENSG00000074590	hsa-miR-29b-3p	ENSG00000074590|ENST00000261402	152	-16.48	2	13	1231	1253	11	0.8182	1	ENSG00000074590|ENST00000261402	hsa-miR-29b-3p	0	29	35	29	35	2178	7mer-m8	x	7mer-m8	0		0	NUAK1	protein_coding
ENSG00000074590	hsa-miR-29c-3p	ENSG00000074590|ENST00000261402	152	-19.2	2	13	1232	1253	11	0.8182	1	ENSG00000074590|ENST00000261402	hsa-miR-29c-3p	0	29	35	29	35	2179	7mer-m8	x	7mer-m8	0		0	NUAK1	protein_coding
ENSG00000066629	hsa-miR-128-3p	ENSG00000066629|ENST00000262233	150	-19.43	2	15	52	72	13	0.7692	0.8462	ENSG00000066629|ENST00000262233	hsa-miR-128-3p	0	22	28	22	28	2189	7mer-m8	x	7mer-m8	0		0	EML1	protein_coding
ENSG00000138685	hsa-miR-148a-3p	ENSG00000138685|ENST00000264498	162	-21.41	2	15	3100	3121	13	0.9231	0.9231	ENSG00000138685|ENST00000264498	hsa-miR-148a-3p	0	26	32	26	32	2223	7mer-m8	x	7mer-m8	0		0	FGF2	protein_coding
ENSG00000138685	hsa-miR-148b-3p	ENSG00000138685|ENST00000264498	150	-15.9	2	15	3100	3121	13	0.7692	0.8462	ENSG00000138685|ENST00000264498	hsa-miR-148b-3p	0	26	32	26	32	2224	7mer-m8	x	7mer-m8	0		0	FGF2	protein_coding
ENSG00000149541	hsa-miR-15a-5p	ENSG00000149541|ENST00000265471	155	-17.65	2	21	132	154	20	0.65	0.8	ENSG00000149541|ENST00000265471	hsa-miR-15a-5p	0	21	26	21	26	2252	6mer	x	6mer	0		0	B3GAT3	protein_coding
ENSG00000149541	hsa-miR-15b-5p	ENSG00000149541|ENST00000265471	158	-19.65	2	20	132	154	19	0.6842	0.8421	ENSG00000149541|ENST00000265471	hsa-miR-15b-5p	0	21	26	21	26	2253	6mer	x	6mer	0		0	B3GAT3	protein_coding
ENSG00000125630	hsa-miR-150-5p	ENSG00000125630|ENST00000263331	142	-15.65	2	20	1695	1718	20	0.65	0.65	ENSG00000125630|ENST00000263331	hsa-miR-150-5p	0	33	39	33	39	2267	7mer-1a	x	7mer-1a	0		0	POLR1B	protein_coding
ENSG00000066926	hsa-miR-128-3p	ENSG00000066926|ENST00000262093	147	-15.33	2	16	5968	5988	14	0.7143	0.7857	ENSG00000066926|ENST00000262093	hsa-miR-128-3p	0	52	57	52	57	2272	6mer	x	6mer	0		0	FECH	protein_coding
ENSG00000073282	hsa-miR-30a-5p	ENSG00000073282|ENST00000264731	158	-16.59	2	21	1244	1267	21	0.7619	0.7619	ENSG00000073282|ENST00000264731	hsa-miR-30a-5p	0	21	28	21	28	2281	8mer-1a	x	8mer-1a	0		0	TP63	protein_coding
ENSG00000073282	hsa-miR-30b-5p	ENSG00000073282|ENST00000264731	158	-17.01	2	21	1243	1267	22	0.7273	0.7727	ENSG00000073282|ENST00000264731	hsa-miR-30b-5p	0	21	28	21	28	2282	8mer-1a	x	8mer-1a	0		0	TP63	protein_coding
ENSG00000073282	hsa-miR-30c-5p	ENSG00000073282|ENST00000264731	149	-15.84	2	16	1242	1267	17	0.7647	0.8235	ENSG00000073282|ENST00000264731	hsa-miR-30c-5p	0	21	28	21	28	2283	8mer-1a	x	8mer-1a	0		0	TP63	protein_coding
ENSG00000073282	hsa-miR-30d-5p	ENSG00000073282|ENST00000264731	150	-12.51	2	21	1244	1267	21	0.7143	0.7143	ENSG00000073282|ENST00000264731	hsa-miR-30d-5p	0	21	28	21	28	2284	8mer-1a	x	8mer-1a	0		0	TP63	protein_coding
ENSG00000115085	hsa-miR-24-3p	ENSG00000115085|ENST00000264972	159	-24	2	21	59	83	22	0.6818	0.7727	ENSG00000115085|ENST00000264972	hsa-miR-24-3p	0	31	37	31	37	2332	7mer-1a	x	7mer-1a	0		0	ZAP70	protein_coding
ENSG00000079102	hsa-miR-142-5p	ENSG00000079102|ENST00000265814	151	-8.17	2	13	4496	4517	12	0.9167	0.9167	ENSG00000079102|ENST00000265814	hsa-miR-142-5p	0	32	38	32	38	2359	7mer-m8	x	7mer-m8	0		0	RUNX1T1	protein_coding
ENSG00000134287	hsa-miR-199a-5p	ENSG00000134287|ENST00000256682	144	-13.48	2	13	2898	2920	11	0.8182	0.8182	ENSG00000134287|ENST00000256682	hsa-miR-199a-5p	0	24	30	24	30	2368	7mer-m8	x	7mer-m8	0		0	ARF3	protein_coding
ENSG00000054267	hsa-miR-664a-5p	ENSG00000054267|ENST00000264183	165	-18.94	2	22	763	786	20	0.7	0.8	ENSG00000054267|ENST00000264183	hsa-miR-664a-5p	0	52	58	52	58	2369	7mer-1a	x	7mer-1a	0		0	ARID4B	protein_coding
ENSG00000140463	hsa-miR-126-5p	ENSG00000140463|ENST00000268057	151	-5.94	2	18	464	483	16	0.6875	0.875	ENSG00000140463|ENST00000268057	hsa-miR-126-5p	0	41	47	41	47	2391	7mer-1a	x	7mer-1a	0		0	BBS4	protein_coding
ENSG00000135315	hsa-miR-23a-3p	ENSG00000135315|ENST00000257766	152	-11.71	2	17	305	325	15	0.6667	0.8667	ENSG00000135315|ENST00000257766	hsa-miR-23a-3p	0	26	32	26	32	2392	7mer-1a	x	7mer-1a	0		0	CEP162	protein_coding
ENSG00000135315	hsa-miR-23b-3p	ENSG00000135315|ENST00000257766	152	-11.71	2	17	303	325	15	0.6667	0.8667	ENSG00000135315|ENST00000257766	hsa-miR-23b-3p	0	26	32	26	32	2393	7mer-1a	x	7mer-1a	0		0	CEP162	protein_coding
ENSG00000135315	hsa-miR-23c	ENSG00000135315|ENST00000257766	160	-14.21	2	17	304	325	15	0.7333	0.9333	ENSG00000135315|ENST00000257766	hsa-miR-23c	0	26	32	26	32	2394	7mer-1a	x	7mer-1a	0		0	CEP162	protein_coding
ENSG00000104432	hsa-miR-30a-5p	ENSG00000104432|ENST00000263851	145	-7.32	2	10	789	810	8	1	1	ENSG00000104432|ENST00000263851	hsa-miR-30a-5p	0	40	45	40	45	2395	6mer	x	6mer	0		0	IL7	protein_coding
ENSG00000104432	hsa-miR-30b-5p	ENSG00000104432|ENST00000263851	145	-6.71	2	10	789	810	8	1	1	ENSG00000104432|ENST00000263851	hsa-miR-30b-5p	0	40	45	40	45	2396	6mer	x	6mer	0		0	IL7	protein_coding
ENSG00000104432	hsa-miR-30c-5p	ENSG00000104432|ENST00000263851	145	-6.73	2	10	788	810	8	1	1	ENSG00000104432|ENST00000263851	hsa-miR-30c-5p	0	40	45	40	45	2397	6mer	x	6mer	0		0	IL7	protein_coding
ENSG00000104432	hsa-miR-30d-5p	ENSG00000104432|ENST00000263851	145	-8.12	2	10	789	810	8	1	1	ENSG00000104432|ENST00000263851	hsa-miR-30d-5p	0	40	45	40	45	2398	6mer	x	6mer	0		0	IL7	protein_coding
ENSG00000104432	hsa-miR-432-5p	ENSG00000104432|ENST00000263851	148	-15.69	2	21	30	52	19	0.5263	0.7895	ENSG00000104432|ENST00000263851	hsa-miR-432-5p	0	35	40	35	40	2399	6mer	x	6mer	0		0	IL7	protein_coding
ENSG00000101193	hsa-miR-15a-5p	ENSG00000101193|ENST00000266069	152	-13.92	2	17	3247	3268	15	0.7333	0.8	ENSG00000101193|ENST00000266069	hsa-miR-15a-5p	0	51	57	51	57	2408	7mer-1a	x	7mer-1a	0		0	GID8	protein_coding
ENSG00000101193	hsa-miR-15b-5p	ENSG00000101193|ENST00000266069	144	-13.16	2	17	3247	3268	15	0.6667	0.7333	ENSG00000101193|ENST00000266069	hsa-miR-15b-5p	0	51	57	51	57	2409	7mer-1a	x	7mer-1a	0		0	GID8	protein_coding
ENSG00000112992	hsa-miR-142-5p	ENSG00000112992|ENST00000264663	158	-8.74	2	19	1776	1796	17	0.7059	0.8235	ENSG00000112992|ENST00000264663	hsa-miR-142-5p	0	24	30	24	30	2434	7mer-m8	x	7mer-m8	0		0	NNT	protein_coding
ENSG00000138623	hsa-miR-27a-3p	ENSG00000138623|ENST00000261918	160	-19.14	2	18	1094	1117	19	0.7895	0.7895	ENSG00000138623|ENST00000261918	hsa-miR-27a-3p	0	31	37	31	37	2450	7mer-m8	x	7mer-m8	0		0	SEMA7A	protein_coding
ENSG00000138623	hsa-miR-27b-3p	ENSG00000138623|ENST00000261918	162	-19.14	2	20	1094	1117	21	0.7619	0.7619	ENSG00000138623|ENST00000261918	hsa-miR-27b-3p	0	31	37	31	37	2451	7mer-m8	x	7mer-m8	0		0	SEMA7A	protein_coding
ENSG00000134049	hsa-miR-134-5p	ENSG00000134049|ENST00000256433	149	-21.59	2	21	1750	1769	19	0.6842	0.7368	ENSG00000134049|ENST00000256433	hsa-miR-134-5p	0	38	43	38	43	2474	6mer	x	6mer	0		0	IER3IP1	protein_coding
ENSG00000134049	hsa-miR-199a-5p	ENSG00000134049|ENST00000256433	142	-23.42	2	20	2587	2611	20	0.6	0.7	ENSG00000134049|ENST00000256433	hsa-miR-199a-5p	0	19	24	19	24	2475	6mer	x	6mer	0		0	IER3IP1	protein_coding
ENSG00000139800	hsa-miR-181a-5p	ENSG00000139800|ENST00000267294	163	-18.36	2	21	1273	1296	20	0.75	0.8	ENSG00000139800|ENST00000267294	hsa-miR-181a-5p	0	26	32	26	32	2477	7mer-1a	x	7mer-1a	0		0	ZIC5	protein_coding
ENSG00000139800	hsa-miR-181b-5p	ENSG00000139800|ENST00000267294	172	-22.64	2	22	1273	1296	21	0.7619	0.8571	ENSG00000139800|ENST00000267294	hsa-miR-181b-5p	0	26	32	26	32	2478	7mer-1a	x	7mer-1a	0		0	ZIC5	protein_coding
ENSG00000107282	hsa-miR-15a-5p	ENSG00000107282|ENST00000265381	145	-13.2	2	20	1845	1865	18	0.6667	0.7222	ENSG00000107282|ENST00000265381	hsa-miR-15a-5p	0	53	58	53	58	2491	6mer	x	6mer	0		0	APBA1	protein_coding
ENSG00000107282	hsa-miR-15b-5p	ENSG00000107282|ENST00000265381	143	-12.94	2	20	1844	1865	18	0.6111	0.6667	ENSG00000107282|ENST00000265381	hsa-miR-15b-5p	0	53	58	53	58	2492	6mer	x	6mer	0		0	APBA1	protein_coding
ENSG00000134757	hsa-miR-151a-3p	ENSG00000134757|ENST00000257189	147	-19.22	2	12	1976	1996	10	0.9	0.9	ENSG00000134757|ENST00000257189	hsa-miR-151a-3p	0	17	23	17	23	2511	7mer-m8	x	7mer-m8	0		0	DSG3	protein_coding
ENSG00000184047	hsa-miR-29a-3p	ENSG00000184047|ENST00000267169	150	-13.6	2	15	732	753	13	0.7692	0.8462	ENSG00000184047|ENST00000267169	hsa-miR-29a-3p	0	33	38	33	38	2514	6mer	x	6mer	0		0	DIABLO	protein_coding
ENSG00000184047	hsa-miR-29b-3p	ENSG00000184047|ENST00000267169	153	-13.28	2	22	731	753	20	0.65	0.7	ENSG00000184047|ENST00000267169	hsa-miR-29b-3p	0	33	38	33	38	2515	6mer	x	6mer	0		0	DIABLO	protein_coding
ENSG00000184047	hsa-miR-29c-3p	ENSG00000184047|ENST00000267169	150	-13.39	2	15	732	753	13	0.7692	0.8462	ENSG00000184047|ENST00000267169	hsa-miR-29c-3p	0	33	38	33	38	2516	6mer	x	6mer	0		0	DIABLO	protein_coding
ENSG00000102858	hsa-miR-29a-3p	ENSG00000102858|ENST00000262370	140	-14.1	2	9	711	732	7	1	1	ENSG00000102858|ENST00000262370	hsa-miR-29a-3p	0	17	22	17	22	2519	6mer	x	6mer	0		0	MGRN1	protein_coding
ENSG00000102858	hsa-miR-29b-3p	ENSG00000102858|ENST00000262370	140	-15.18	2	9	710	732	7	1	1	ENSG00000102858|ENST00000262370	hsa-miR-29b-3p	0	17	22	17	22	2520	6mer	x	6mer	0		0	MGRN1	protein_coding
ENSG00000102858	hsa-miR-29c-3p	ENSG00000102858|ENST00000262370	140	-14.1	2	9	711	732	7	1	1	ENSG00000102858|ENST00000262370	hsa-miR-29c-3p	0	17	22	17	22	2521	6mer	x	6mer	0		0	MGRN1	protein_coding
ENSG00000099864	hsa-miR-361-3p	ENSG00000099864|ENST00000264560	154	-24.42	2	15	1057	1079	13	0.8462	0.8462	ENSG00000099864|ENST00000264560	hsa-miR-361-3p	0	33	39	33	39	2533	7mer-m8	x	7mer-m8	0		0	PALM	protein_coding
ENSG00000113368	hsa-miR-30a-3p	ENSG00000113368|ENST00000261366	140	-10.96	2	9	137	158	7	1	1	ENSG00000113368|ENST00000261366	hsa-miR-30a-3p	0	33	39	33	39	2549	7mer-m8	x	7mer-m8	0		0	LMNB1	protein_coding
ENSG00000113368	hsa-miR-30e-3p	ENSG00000113368|ENST00000261366	140	-10.96	2	9	137	158	7	1	1	ENSG00000113368|ENST00000261366	hsa-miR-30e-3p	0	33	39	33	39	2550	7mer-m8	x	7mer-m8	0		0	LMNB1	protein_coding
ENSG00000121879	hsa-miR-320c	ENSG00000121879|ENST00000263967	141	-12.48	2	10	1044	1063	8	0.875	1	ENSG00000121879|ENST00000263967	hsa-miR-320c	0	17	23	17	23	2573	7mer-m8	x	7mer-m8	0		0	PIK3CA	protein_coding
ENSG00000121879	hsa-miR-320d	ENSG00000121879|ENST00000263967	141	-12.48	2	10	1045	1063	8	0.875	1	ENSG00000121879|ENST00000263967	hsa-miR-320d	0	17	23	17	23	2574	7mer-m8	x	7mer-m8	0		0	PIK3CA	protein_coding
ENSG00000076003	hsa-miR-320c	ENSG00000076003|ENST00000264156	144	-14.87	2	19	853	871	17	0.6471	0.7647	ENSG00000076003|ENST00000264156	hsa-miR-320c	0	17	23	17	23	2582	7mer-m8	x	7mer-m8	0		0	MCM6	protein_coding
ENSG00000076003	hsa-miR-320d	ENSG00000076003|ENST00000264156	140	-14.65	2	9	853	871	7	1	1	ENSG00000076003|ENST00000264156	hsa-miR-320d	0	17	23	17	23	2583	7mer-m8	x	7mer-m8	0		0	MCM6	protein_coding
ENSG00000115561	hsa-miR-126-5p	ENSG00000115561|ENST00000263856	140	-3.03	2	9	2114	2134	7	1	1	ENSG00000115561|ENST00000263856	hsa-miR-126-5p	0	34	41	34	41	2596	8mer-1a	x	8mer-1a	0		0	CHMP3	protein_coding
ENSG00000187790	hsa-miR-21-5p	ENSG00000187790|ENST00000267430	155	-11.25	2	16	715	736	14	0.7143	0.9286	ENSG00000187790|ENST00000267430	hsa-miR-21-5p	0	37	42	37	42	2599	6mer	x	6mer	0		0	FANCM	protein_coding
ENSG00000092445	hsa-miR-25-3p	ENSG00000092445|ENST00000263798	157	-20.85	2	19	1517	1540	19	0.6842	0.8421	ENSG00000092445|ENST00000263798	hsa-miR-25-3p	0	52	57	52	57	2624	6mer	x	6mer	0		0	TYRO3	protein_coding
ENSG00000092445	hsa-miR-92a-3p	ENSG00000092445|ENST00000263798	155	-25.51	2	21	1523	1540	19	0.7368	0.7895	ENSG00000092445|ENST00000263798	hsa-miR-92a-3p	0	52	57	52	57	2626	6mer	x	6mer	0		0	TYRO3	protein_coding
ENSG00000136986	hsa-miR-224-5p	ENSG00000136986|ENST00000259512	151	-17.5	2	24	1940	1968	27	0.6296	0.7407	ENSG00000136986|ENST00000259512	hsa-miR-224-5p	0	50	56	50	56	2641	7mer-m8	x	7mer-m8	0		0	DERL1	protein_coding
ENSG00000132640	hsa-miR-130a-3p	ENSG00000132640|ENST00000254977	152	-16.72	2	14	2665	2687	13	0.8462	0.9231	ENSG00000132640|ENST00000254977	hsa-miR-130a-3p	0	19	26	19	26	2646	8mer-1a	x	8mer-1a	0		0	BTBD3	protein_coding
ENSG00000104611	hsa-miR-181a-5p	ENSG00000104611|ENST00000265807	153	-10.89	2	20	519	540	18	0.7222	0.7778	ENSG00000104611|ENST00000265807	hsa-miR-181a-5p	0	46	52	46	52	2657	7mer-m8	x	7mer-m8	0		0	SH2D4A	protein_coding
ENSG00000104611	hsa-miR-181b-5p	ENSG00000104611|ENST00000265807	161	-12.16	2	20	519	540	18	0.7778	0.8333	ENSG00000104611|ENST00000265807	hsa-miR-181b-5p	0	46	52	46	52	2658	7mer-m8	x	7mer-m8	0		0	SH2D4A	protein_coding
ENSG00000125520	hsa-miR-320c	ENSG00000125520|ENST00000266077	157	-22.26	2	19	199	221	20	0.75	0.75	ENSG00000125520|ENST00000266077	hsa-miR-320c	0	22	27	22	27	2659	6mer	x	6mer	0		0	SLC2A4RG	protein_coding
ENSG00000125520	hsa-miR-320d	ENSG00000125520|ENST00000266077	157	-16.84	2	18	316	334	16	0.6875	0.875	ENSG00000125520|ENST00000266077	hsa-miR-320d	0	22	27	22	27	2660	6mer	x	6mer	0		0	SLC2A4RG	protein_coding
ENSG00000166997	hsa-miR-30a-3p	ENSG00000166997|ENST00000262932	153	-17.27	2	21	250	269	19	0.6842	0.7895	ENSG00000166997|ENST00000262932	hsa-miR-30a-3p	0	36	43	36	43	2667	8mer-1a	x	8mer-1a	0		0	CNPY4	protein_coding
ENSG00000166997	hsa-miR-30e-3p	ENSG00000166997|ENST00000262932	145	-16.67	2	21	250	269	19	0.6316	0.7368	ENSG00000166997|ENST00000262932	hsa-miR-30e-3p	0	36	43	36	43	2668	8mer-1a	x	8mer-1a	0		0	CNPY4	protein_coding
ENSG00000101654	hsa-miR-181a-5p	ENSG00000101654|ENST00000262173	157	-15.35	2	22	442	464	20	0.6	0.8	ENSG00000101654|ENST00000262173	hsa-miR-181a-5p	0	47	53	47	53	2677	7mer-m8	x	7mer-m8	0		0	RNMT	protein_coding
ENSG00000101654	hsa-miR-181b-5p	ENSG00000101654|ENST00000262173	150	-15.31	2	19	443	464	18	0.7222	0.8333	ENSG00000101654|ENST00000262173	hsa-miR-181b-5p	0	47	53	47	53	2678	7mer-m8	x	7mer-m8	0		0	RNMT	protein_coding
ENSG00000139832	hsa-miR-128-3p	ENSG00000139832|ENST00000267328	150	-17.44	2	11	419	439	9	1	1	ENSG00000139832|ENST00000267328	hsa-miR-128-3p	0	31	38	31	38	2701	8mer-1a	x	8mer-1a	0		0	RAB20	protein_coding
ENSG00000139832	hsa-miR-27a-3p	ENSG00000139832|ENST00000267328	146	-21.08	2	11	420	440	9	0.8889	1	ENSG00000139832|ENST00000267328	hsa-miR-27a-3p	0	32	38	32	38	2702	7mer-m8	x	7mer-m8	0		0	RAB20	protein_coding
ENSG00000139832	hsa-miR-27b-3p	ENSG00000139832|ENST00000267328	150	-19.43	2	20	418	440	20	0.65	0.75	ENSG00000139832|ENST00000267328	hsa-miR-27b-3p	0	32	38	32	38	2703	7mer-m8	x	7mer-m8	0		0	RAB20	protein_coding
ENSG00000014824	hsa-miR-148a-3p	ENSG00000014824|ENST00000264451	166	-21.69	2	19	1987	2008	17	0.8235	0.8235	ENSG00000014824|ENST00000264451	hsa-miR-148a-3p	0	31	36	31	36	2708	6mer	x	6mer	0		0	SLC30A9	protein_coding
ENSG00000014824	hsa-miR-148b-3p	ENSG00000014824|ENST00000264451	166	-21.77	2	19	1987	2008	17	0.8235	0.8235	ENSG00000014824|ENST00000264451	hsa-miR-148b-3p	0	31	36	31	36	2709	6mer	x	6mer	0		0	SLC30A9	protein_coding
ENSG00000100034	hsa-miR-24-3p	ENSG00000100034|ENST00000263212	155	-22.45	2	21	3041	3063	20	0.7	0.75	ENSG00000100034|ENST00000263212	hsa-miR-24-3p	0	32	39	32	39	2731	8mer-1a	x	8mer-1a	0		0	PPM1F	protein_coding
ENSG00000011638	hsa-miR-128-3p	ENSG00000011638|ENST00000261388	146	-15.02	2	20	956	977	19	0.6316	0.7368	ENSG00000011638|ENST00000261388	hsa-miR-128-3p	0	52	57	52	57	2736	6mer	x	6mer	0		0	TMEM159	protein_coding
ENSG00000134001	hsa-miR-664a-5p	ENSG00000134001|ENST00000256383	164	-22.77	2	17	1659	1682	15	0.8667	0.8667	ENSG00000134001|ENST00000256383	hsa-miR-664a-5p	0	46	51	46	51	2743	6mer	x	6mer	0		0	EIF2S1	protein_coding
ENSG00000089220	hsa-miR-361-3p	ENSG00000089220|ENST00000261313	151	-20.59	2	19	287	307	17	0.7647	0.7647	ENSG00000089220|ENST00000261313	hsa-miR-361-3p	0	23	28	23	28	2754	6mer	x	6mer	0		0	PEBP1	protein_coding
ENSG00000126749	hsa-miR-150-5p	ENSG00000126749|ENST00000261406	150	-16.88	2	19	284	304	17	0.6471	0.7647	ENSG00000126749|ENST00000261406	hsa-miR-150-5p	0	49	54	49	54	2765	6mer	x	6mer	0		0	EMG1	protein_coding
ENSG00000005339	hsa-miR-30a-3p	ENSG00000005339|ENST00000262367	149	-10.16	2	21	35	56	20	0.65	0.8	ENSG00000005339|ENST00000262367	hsa-miR-30a-3p	0	41	46	41	46	2767	6mer	x	6mer	0		0	CREBBP	protein_coding
ENSG00000005339	hsa-miR-30e-3p	ENSG00000005339|ENST00000262367	149	-11.61	2	21	35	56	20	0.65	0.8	ENSG00000005339|ENST00000262367	hsa-miR-30e-3p	0	41	46	41	46	2768	6mer	x	6mer	0		0	CREBBP	protein_coding
ENSG00000187720	hsa-miR-320c	ENSG00000187720|ENST00000261862	156	-21.43	2	13	733	752	11	0.9091	1	ENSG00000187720|ENST00000261862	hsa-miR-320c	0	23	29	23	29	2777	7mer-1a	x	7mer-1a	0		0	THSD4	protein_coding
ENSG00000187720	hsa-miR-320d	ENSG00000187720|ENST00000261862	156	-18.5	2	13	734	752	11	0.9091	1	ENSG00000187720|ENST00000261862	hsa-miR-320d	0	23	29	23	29	2778	7mer-1a	x	7mer-1a	0		0	THSD4	protein_coding
ENSG00000135074	hsa-miR-361-3p	ENSG00000135074|ENST00000257527	167	-31.19	2	22	1696	1720	22	0.7273	0.8636	ENSG00000135074|ENST00000257527	hsa-miR-361-3p	0	36	41	36	41	2794	6mer	x	6mer	0		0	ADAM19	protein_coding
ENSG00000139133	hsa-miR-181a-5p	ENSG00000139133|ENST00000266483	164	-21.05	2	22	1050	1075	23	0.6957	0.7826	ENSG00000139133|ENST00000266483	hsa-miR-181a-5p	0	49	54	49	54	2822	6mer	x	6mer	0		0	ALG10	protein_coding
ENSG00000139133	hsa-miR-181b-5p	ENSG00000139133|ENST00000266483	148	-15.53	2	22	1050	1075	23	0.6087	0.6957	ENSG00000139133|ENST00000266483	hsa-miR-181b-5p	0	49	54	49	54	2823	6mer	x	6mer	0		0	ALG10	protein_coding
ENSG00000137875	hsa-miR-27a-3p	ENSG00000137875|ENST00000260442	151	-12.38	2	17	21	42	16	0.75	0.8125	ENSG00000137875|ENST00000260442	hsa-miR-27a-3p	0	15	21	15	21	2827	7mer-m8	x	7mer-m8	0		0	BCL2L10	protein_coding
ENSG00000137875	hsa-miR-27b-3p	ENSG00000137875|ENST00000260442	151	-12.38	2	17	21	42	16	0.75	0.8125	ENSG00000137875|ENST00000260442	hsa-miR-27b-3p	0	15	21	15	21	2828	7mer-m8	x	7mer-m8	0		0	BCL2L10	protein_coding
ENSG00000138755	hsa-miR-224-5p	ENSG00000138755|ENST00000264888	161	-13.27	2	18	2036	2060	16	0.8125	0.8125	ENSG00000138755|ENST00000264888	hsa-miR-224-5p	0	45	50	45	50	2829	6mer	x	6mer	0		0	CXCL9	protein_coding
ENSG00000128791	hsa-miR-335-5p	ENSG00000128791|ENST00000262120	156	-14.12	2	17	1441	1463	15	0.8	0.8	ENSG00000128791|ENST00000262120	hsa-miR-335-5p	0	30	36	30	36	2832	7mer-m8	x	7mer-m8	0		0	TWSG1	protein_coding
ENSG00000113805	hsa-miR-15a-5p	ENSG00000113805|ENST00000263665	146	-17.81	2	20	1135	1157	19	0.6316	0.7368	ENSG00000113805|ENST00000263665	hsa-miR-15a-5p	0	28	34	28	34	2837	7mer-m8	x	7mer-m8	0		0	CNTN3	protein_coding
ENSG00000113805	hsa-miR-15b-5p	ENSG00000113805|ENST00000263665	154	-20.07	2	20	1135	1157	19	0.6842	0.7895	ENSG00000113805|ENST00000263665	hsa-miR-15b-5p	0	28	34	28	34	2839	7mer-m8	x	7mer-m8	0		0	CNTN3	protein_coding
ENSG00000100170	hsa-miR-361-3p	ENSG00000100170|ENST00000266088	148	-23.19	2	22	2498	2521	21	0.619	0.7143	ENSG00000100170|ENST00000266088	hsa-miR-361-3p	0	51	57	51	57	2852	7mer-m8	x	7mer-m8	0		0	SLC5A1	protein_coding
ENSG00000122966	hsa-miR-30a-5p	ENSG00000122966|ENST00000261833	148	-11.12	2	21	638	658	20	0.7	0.75	ENSG00000122966|ENST00000261833	hsa-miR-30a-5p	0	22	29	22	29	2856	8mer-1a	x	8mer-1a	0		0	CIT	protein_coding
ENSG00000122966	hsa-miR-30b-5p	ENSG00000122966|ENST00000261833	145	-10.62	2	10	637	658	8	1	1	ENSG00000122966|ENST00000261833	hsa-miR-30b-5p	0	22	29	22	29	2857	8mer-1a	x	8mer-1a	0		0	CIT	protein_coding
ENSG00000122966	hsa-miR-30c-5p	ENSG00000122966|ENST00000261833	156	-12.64	2	22	633	658	23	0.6957	0.6957	ENSG00000122966|ENST00000261833	hsa-miR-30c-5p	0	22	29	22	29	2858	8mer-1a	x	8mer-1a	0		0	CIT	protein_coding
ENSG00000122966	hsa-miR-30d-5p	ENSG00000122966|ENST00000261833	145	-10.37	2	10	637	658	8	1	1	ENSG00000122966|ENST00000261833	hsa-miR-30d-5p	0	22	29	22	29	2859	8mer-1a	x	8mer-1a	0		0	CIT	protein_coding
ENSG00000074054	hsa-miR-432-5p	ENSG00000074054|ENST00000263710	159	-19.68	2	22	2471	2492	20	0.7	0.8	ENSG00000074054|ENST00000263710	hsa-miR-432-5p	0	30	37	30	37	2860	8mer-1a	x	8mer-1a	0		0	CLASP1	protein_coding
ENSG00000080493	hsa-miR-335-5p	ENSG00000080493|ENST00000264485	153	-13.1	2	19	614	637	18	0.7222	0.7778	ENSG00000080493|ENST00000264485	hsa-miR-335-5p	0	45	50	45	50	2866	6mer	x	6mer	0		0	SLC4A4	protein_coding
ENSG00000075275	hsa-miR-142-5p	ENSG00000075275|ENST00000262738	155	-11.8	2	20	1873	1893	18	0.7222	0.7222	ENSG00000075275|ENST00000262738	hsa-miR-142-5p	0	36	41	36	41	2889	6mer	x	6mer	0		0	CELSR1	protein_coding
ENSG00000138092	hsa-miR-7847-3p	ENSG00000138092|ENST00000260662	151	-22.12	2	20	245	265	18	0.6667	0.7222	ENSG00000138092|ENST00000260662	hsa-miR-7847-3p	0	51	57	51	57	2892	7mer-1a	x	7mer-1a	0		0	CENPO	protein_coding
ENSG00000140464	hsa-miR-24-3p	ENSG00000140464|ENST00000268058	140	-20.32	2	9	40	61	7	1	1	ENSG00000140464|ENST00000268058	hsa-miR-24-3p	0	49	56	49	56	2893	8mer-1a	x	8mer-1a	0		0	PML	protein_coding
ENSG00000101670	hsa-miR-128-3p	ENSG00000101670|ENST00000261292	173	-30.54	2	20	7688	7710	20	0.85	0.9	ENSG00000101670|ENST00000261292	hsa-miR-128-3p	0	47	52	47	52	2895	6mer	x	6mer	0		0	LIPG	protein_coding
ENSG00000101670	hsa-miR-148a-3p	ENSG00000101670|ENST00000261292	154	-21.46	2	21	487	511	22	0.6364	0.8182	ENSG00000101670|ENST00000261292	hsa-miR-148a-3p	0	31	36	31	36	2896	6mer	x	6mer	0		0	LIPG	protein_coding
ENSG00000101670	hsa-miR-148b-3p	ENSG00000101670|ENST00000261292	155	-21.89	2	21	487	511	22	0.6364	0.7727	ENSG00000101670|ENST00000261292	hsa-miR-148b-3p	0	31	36	31	36	2897	6mer	x	6mer	0		0	LIPG	protein_coding
ENSG00000113600	hsa-miR-29a-3p	ENSG00000113600|ENST00000263408	151	-13.46	2	21	851	875	22	0.6364	0.7273	ENSG00000113600|ENST00000263408	hsa-miR-29a-3p	0	54	59	54	59	2910	6mer	x	6mer	0		0	C9	protein_coding
ENSG00000113600	hsa-miR-29b-3p	ENSG00000113600|ENST00000263408	152	-16.08	2	22	850	875	23	0.6087	0.7391	ENSG00000113600|ENST00000263408	hsa-miR-29b-3p	0	54	59	54	59	2911	6mer	x	6mer	0		0	C9	protein_coding
ENSG00000113600	hsa-miR-29c-3p	ENSG00000113600|ENST00000263408	147	-12.38	2	12	854	875	10	0.9	0.9	ENSG00000113600|ENST00000263408	hsa-miR-29c-3p	0	54	59	54	59	2912	6mer	x	6mer	0		0	C9	protein_coding
ENSG00000031081	hsa-miR-15a-5p	ENSG00000031081|ENST00000264245	149	-15.6	2	19	2584	2606	18	0.6667	0.7778	ENSG00000031081|ENST00000264245	hsa-miR-15a-5p	0	16	22	16	22	2918	7mer-m8	x	7mer-m8	0		0	ARHGAP31	protein_coding
ENSG00000031081	hsa-miR-15b-5p	ENSG00000031081|ENST00000264245	151	-17.25	2	21	2584	2606	20	0.65	0.75	ENSG00000031081|ENST00000264245	hsa-miR-15b-5p	0	16	22	16	22	2919	7mer-m8	x	7mer-m8	0		0	ARHGAP31	protein_coding
ENSG00000138622	hsa-miR-27a-3p	ENSG00000138622|ENST00000261917	141	-10.42	2	18	53	70	16	0.625	0.8125	ENSG00000138622|ENST00000261917	hsa-miR-27a-3p	0	53	59	53	59	2934	7mer-1a	x	7mer-1a	0		0	HCN4	protein_coding
ENSG00000138622	hsa-miR-27b-3p	ENSG00000138622|ENST00000261917	141	-13.82	2	18	53	70	16	0.625	0.8125	ENSG00000138622|ENST00000261917	hsa-miR-27b-3p	0	53	59	53	59	2935	7mer-1a	x	7mer-1a	0		0	HCN4	protein_coding
ENSG00000175387	hsa-miR-142-5p	ENSG00000175387|ENST00000262160	146	-6.2	2	19	18496	18516	17	0.6471	0.7059	ENSG00000175387|ENST00000262160	hsa-miR-142-5p	0	54	59	54	59	2941	6mer	x	6mer	0		0	SMAD2	protein_coding
ENSG00000175387	hsa-miR-320c	ENSG00000175387|ENST00000262160	148	-15.11	2	18	17607	17630	20	0.6	0.8	ENSG00000175387|ENST00000262160	hsa-miR-320c	0	51	58	51	58	2943	8mer-1a	x	8mer-1a	0		0	SMAD2	protein_coding
ENSG00000175387	hsa-miR-320d	ENSG00000175387|ENST00000262160	148	-14.57	2	18	17608	17630	20	0.6	0.8	ENSG00000175387|ENST00000262160	hsa-miR-320d	0	51	58	51	58	2944	8mer-1a	x	8mer-1a	0		0	SMAD2	protein_coding
ENSG00000137726	hsa-miR-24-3p	ENSG00000137726|ENST00000260282	149	-27.44	2	20	338	362	21	0.6667	0.7619	ENSG00000137726|ENST00000260282	hsa-miR-24-3p	0	28	33	28	33	2966	6mer	x	6mer	0		0	FXYD6	protein_coding
ENSG00000136870	hsa-miR-7847-3p	ENSG00000136870|ENST00000259395	145	-15.5	2	17	754	772	15	0.7333	0.8	ENSG00000136870|ENST00000259395	hsa-miR-7847-3p	0	22	28	22	28	2968	7mer-m8	x	7mer-m8	0		0	ZNF189	protein_coding
ENSG00000070540	hsa-miR-664a-5p	ENSG00000070540|ENST00000262139	145	-16.45	2	14	381	404	12	0.6667	0.9167	ENSG00000070540|ENST00000262139	hsa-miR-664a-5p	0	22	28	22	28	2973	7mer-1a	x	7mer-1a	0		0	WIPI1	protein_coding
ENSG00000168610	hsa-miR-664a-5p	ENSG00000168610|ENST00000264657	162	-21.4	2	21	1441	1463	19	0.7368	0.8421	ENSG00000168610|ENST00000264657	hsa-miR-664a-5p	0	23	28	23	28	2974	6mer	x	6mer	0		0	STAT3	protein_coding
ENSG00000135956	hsa-miR-223-3p	ENSG00000135956|ENST00000258439	141	-16.31	2	10	4065	4086	8	0.875	1	ENSG00000135956|ENST00000258439	hsa-miR-223-3p	0	38	43	38	43	2975	6mer	x	6mer	0		0	TMEM127	protein_coding
ENSG00000213614	hsa-miR-432-5p	ENSG00000213614|ENST00000268097	146	-13.46	2	17	414	435	15	0.7333	0.8	ENSG00000213614|ENST00000268097	hsa-miR-432-5p	0	43	49	43	49	2982	7mer-m8	x	7mer-m8	0		0	HEXA	protein_coding
ENSG00000108091	hsa-miR-15a-5p	ENSG00000108091|ENST00000263102	162	-22.28	2	21	3347	3367	19	0.7368	0.8421	ENSG00000108091|ENST00000263102	hsa-miR-15a-5p	0	53	59	53	59	2989	7mer-m8	x	7mer-m8	0		0	CCDC6	protein_coding
ENSG00000108091	hsa-miR-15b-5p	ENSG00000108091|ENST00000263102	155	-22.14	2	21	2685	2707	20	0.65	0.8	ENSG00000108091|ENST00000263102	hsa-miR-15b-5p	0	53	59	53	59	2990	7mer-m8	x	7mer-m8	0		0	CCDC6	protein_coding
ENSG00000108091	hsa-miR-24-3p	ENSG00000108091|ENST00000263102	151	-25.05	2	21	3807	3830	21	0.6667	0.7143	ENSG00000108091|ENST00000263102	hsa-miR-24-3p	0	47	52	47	52	2991	6mer	x	6mer	0		0	CCDC6	protein_coding
ENSG00000071564	hsa-miR-199a-5p	ENSG00000071564|ENST00000262965	143	-23.75	2	22	156	177	20	0.6	0.7	ENSG00000071564|ENST00000262965	hsa-miR-199a-5p	0	50	55	50	55	3009	6mer	x	6mer	0		0	TCF3	protein_coding
ENSG00000138443	hsa-miR-320c	ENSG00000138443|ENST00000261016	146	-13.02	2	19	3320	3339	17	0.5882	0.7647	ENSG00000138443|ENST00000261016	hsa-miR-320c	0	39	44	39	44	3014	6mer	x	6mer	0		0	ABI2	protein_coding
ENSG00000138443	hsa-miR-320d	ENSG00000138443|ENST00000261016	145	-12.44	2	18	3321	3339	16	0.625	0.75	ENSG00000138443|ENST00000261016	hsa-miR-320d	0	39	44	39	44	3015	6mer	x	6mer	0		0	ABI2	protein_coding
ENSG00000119772	hsa-miR-335-5p	ENSG00000119772|ENST00000264709	143	-14.4	2	12	3872	3894	10	0.8	0.9	ENSG00000119772|ENST00000264709	hsa-miR-335-5p	0	29	34	29	34	3049	6mer	x	6mer	0		0	DNMT3A	protein_coding
ENSG00000172752	hsa-miR-221-3p	ENSG00000172752|ENST00000265379	155	-16.68	2	12	825	847	10	1	1	ENSG00000172752|ENST00000265379	hsa-miR-221-3p	0	39	44	39	44	3050	6mer	x	6mer	0		0	COL6A5	protein_coding
ENSG00000125741	hsa-miR-150-5p	ENSG00000125741|ENST00000263275	152	-21.84	2	21	5432	5452	20	0.75	0.75	ENSG00000125741|ENST00000263275	hsa-miR-150-5p	0	18	23	18	23	3067	6mer	x	6mer	0		0	OPA3	protein_coding
ENSG00000039068	hsa-miR-224-5p	ENSG00000039068|ENST00000261769	168	-23.89	2	23	1210	1237	24	0.7083	0.8333	ENSG00000039068|ENST00000261769	hsa-miR-224-5p	0	18	25	18	25	3087	8mer-1a	x	8mer-1a	0		0	CDH1	protein_coding
ENSG00000134070	hsa-miR-150-5p	ENSG00000134070|ENST00000256458	164	-22.04	2	21	543	564	19	0.7368	0.7895	ENSG00000134070|ENST00000256458	hsa-miR-150-5p	0	27	34	27	34	3100	8mer-1a	x	8mer-1a	0		0	IRAK2	protein_coding
ENSG00000139370	hsa-miR-15a-5p	ENSG00000139370|ENST00000266771	166	-19.94	2	21	570	594	22	0.7727	0.8182	ENSG00000139370|ENST00000266771	hsa-miR-15a-5p	0	20	26	20	26	3107	7mer-m8	x	7mer-m8	0		0	SLC15A4	protein_coding
ENSG00000139370	hsa-miR-15b-5p	ENSG00000139370|ENST00000266771	162	-19.32	2	21	570	594	22	0.7727	0.7727	ENSG00000139370|ENST00000266771	hsa-miR-15b-5p	0	20	26	20	26	3108	7mer-m8	x	7mer-m8	0		0	SLC15A4	protein_coding
ENSG00000118482	hsa-miR-126-5p	ENSG00000118482|ENST00000262043	142	-7.94	2	11	8897	8917	9	0.8889	0.8889	ENSG00000118482|ENST00000262043	hsa-miR-126-5p	0	26	31	26	31	3144	6mer	x	6mer	0		0	PHF3	protein_coding
ENSG00000118482	hsa-miR-425-5p	ENSG00000118482|ENST00000262043	140	-11.16	2	9	4797	4819	7	1	1	ENSG00000118482|ENST00000262043	hsa-miR-425-5p	0	49	54	49	54	3145	6mer	x	6mer	0		0	PHF3	protein_coding
ENSG00000146216	hsa-miR-584-5p	ENSG00000146216|ENST00000259750	154	-17.15	2	20	790	812	19	0.6842	0.7895	ENSG00000146216|ENST00000259750	hsa-miR-584-5p	0	24	29	24	29	3162	6mer	x	6mer	0		0	TTBK1	protein_coding
ENSG00000240505	hsa-miR-25-3p	ENSG00000240505|ENST00000261652	153	-12.52	2	19	360	383	19	0.7368	0.7368	ENSG00000240505|ENST00000261652	hsa-miR-25-3p	0	52	58	52	58	3167	7mer-m8	x	7mer-m8	0		0	TNFRSF13B	protein_coding
ENSG00000240505	hsa-miR-92a-3p	ENSG00000240505|ENST00000261652	152	-14.17	2	13	362	383	11	0.9091	0.9091	ENSG00000240505|ENST00000261652	hsa-miR-92a-3p	0	52	58	52	58	3168	7mer-m8	x	7mer-m8	0		0	TNFRSF13B	protein_coding
ENSG00000139044	hsa-miR-150-5p	ENSG00000139044|ENST00000266383	167	-32.19	2	21	695	718	21	0.7619	0.8095	ENSG00000139044|ENST00000266383	hsa-miR-150-5p	0	44	49	44	49	3179	6mer	x	6mer	0		0	B4GALNT3	protein_coding
ENSG00000139044	hsa-miR-15a-5p	ENSG00000139044|ENST00000266383	150	-14.76	2	20	1294	1316	19	0.5789	0.8421	ENSG00000139044|ENST00000266383	hsa-miR-15a-5p	0	53	59	53	59	3180	7mer-m8	x	7mer-m8	0		0	B4GALNT3	protein_coding
ENSG00000139044	hsa-miR-15b-5p	ENSG00000139044|ENST00000266383	148	-17.46	2	14	1297	1319	13	0.8462	0.8462	ENSG00000139044|ENST00000266383	hsa-miR-15b-5p	0	53	59	53	59	3181	7mer-m8	x	7mer-m8	0		0	B4GALNT3	protein_coding
ENSG00000108381	hsa-miR-181a-5p	ENSG00000108381|ENST00000263080	146	-15.91	2	20	593	617	20	0.65	0.7	ENSG00000108381|ENST00000263080	hsa-miR-181a-5p	0	15	21	15	21	3193	7mer-m8	x	7mer-m8	0		0	ASPA	protein_coding
ENSG00000108381	hsa-miR-181b-5p	ENSG00000108381|ENST00000263080	153	-17.51	2	18	595	617	16	0.6875	0.8125	ENSG00000108381|ENST00000263080	hsa-miR-181b-5p	0	15	21	15	21	3194	7mer-m8	x	7mer-m8	0		0	ASPA	protein_coding
ENSG00000001629	hsa-miR-25-3p	ENSG00000001629|ENST00000265742	153	-14.72	2	14	935	956	12	0.75	1	ENSG00000001629|ENST00000265742	hsa-miR-25-3p	0	28	35	28	35	3203	8mer-1a	x	8mer-1a	0		0	ANKIB1	protein_coding
ENSG00000001629	hsa-miR-92a-3p	ENSG00000001629|ENST00000265742	153	-14.69	2	14	935	956	12	0.75	1	ENSG00000001629|ENST00000265742	hsa-miR-92a-3p	0	28	35	28	35	3204	8mer-1a	x	8mer-1a	0		0	ANKIB1	protein_coding
ENSG00000126603	hsa-miR-29a-3p	ENSG00000126603|ENST00000262366	160	-23.17	2	21	1247	1268	19	0.6842	0.7895	ENSG00000126603|ENST00000262366	hsa-miR-29a-3p	0	33	39	33	39	3208	7mer-m8	x	7mer-m8	0		0	GLIS2	protein_coding
ENSG00000126603	hsa-miR-29b-3p	ENSG00000126603|ENST00000262366	152	-20.39	2	22	119	143	22	0.6364	0.7273	ENSG00000126603|ENST00000262366	hsa-miR-29b-3p	0	33	39	33	39	3209	7mer-m8	x	7mer-m8	0		0	GLIS2	protein_coding
ENSG00000126603	hsa-miR-29c-3p	ENSG00000126603|ENST00000262366	156	-20.78	2	21	1247	1268	19	0.6316	0.7895	ENSG00000126603|ENST00000262366	hsa-miR-29c-3p	0	33	39	33	39	3210	7mer-m8	x	7mer-m8	0		0	GLIS2	protein_coding
ENSG00000115966	hsa-miR-30a-3p	ENSG00000115966|ENST00000264110	162	-16.95	2	20	148	170	19	0.7368	0.8421	ENSG00000115966|ENST00000264110	hsa-miR-30a-3p	0	26	33	26	33	3218	8mer-1a	x	8mer-1a	0		0	ATF2	protein_coding
ENSG00000115966	hsa-miR-30e-3p	ENSG00000115966|ENST00000264110	157	-13.57	2	14	149	170	12	0.9167	0.9167	ENSG00000115966|ENST00000264110	hsa-miR-30e-3p	0	26	33	26	33	3219	8mer-1a	x	8mer-1a	0		0	ATF2	protein_coding
ENSG00000105810	hsa-miR-148a-3p	ENSG00000105810|ENST00000265734	144	-13.53	2	21	2259	2277	19	0.6842	0.6842	ENSG00000105810|ENST00000265734	hsa-miR-148a-3p	0	35	41	35	41	3224	7mer-m8	x	7mer-m8	0		0	CDK6	protein_coding
ENSG00000105810	hsa-miR-148b-3p	ENSG00000105810|ENST00000265734	140	-13.28	2	9	2256	2277	7	1	1	ENSG00000105810|ENST00000265734	hsa-miR-148b-3p	0	35	41	35	41	3225	7mer-m8	x	7mer-m8	0		0	CDK6	protein_coding
ENSG00000135631	hsa-miR-150-5p	ENSG00000135631|ENST00000258098	142	-16.35	2	21	197	217	19	0.5789	0.7368	ENSG00000135631|ENST00000258098	hsa-miR-150-5p	0	26	32	26	32	3228	7mer-m8	x	7mer-m8	0		0	RAB11FIP5	protein_coding
ENSG00000110400	hsa-miR-361-3p	ENSG00000110400|ENST00000264025	159	-25.6	2	20	3629	3651	18	0.7222	0.7778	ENSG00000110400|ENST00000264025	hsa-miR-361-3p	0	22	28	22	28	3252	7mer-m8	x	7mer-m8	0		0	NECTIN1	protein_coding
ENSG00000101336	hsa-miR-30a-3p	ENSG00000101336|ENST00000262651	149	-15.04	2	20	38	65	24	0.6667	0.7083	ENSG00000101336|ENST00000262651	hsa-miR-30a-3p	0	17	23	17	23	3253	7mer-1a	x	7mer-1a	0		0	HCK	protein_coding
ENSG00000101336	hsa-miR-30e-3p	ENSG00000101336|ENST00000262651	141	-10.65	2	20	38	65	24	0.625	0.6667	ENSG00000101336|ENST00000262651	hsa-miR-30e-3p	0	17	23	17	23	3254	7mer-1a	x	7mer-1a	0		0	HCK	protein_coding
ENSG00000139890	hsa-miR-744-5p	ENSG00000139890|ENST00000267396	157	-25.3	2	14	49	70	12	0.9167	0.9167	ENSG00000139890|ENST00000267396	hsa-miR-744-5p	0	30	35	30	35	3270	6mer	x	6mer	0		0	REM2	protein_coding
ENSG00000118620	hsa-miR-150-5p	ENSG00000118620|ENST00000261560	163	-21.68	2	17	197	219	16	0.875	0.875	ENSG00000118620|ENST00000261560	hsa-miR-150-5p	0	55	60	55	60	3272	6mer	x	6mer	0		0	ZNF430	protein_coding
ENSG00000136720	hsa-miR-181a-5p	ENSG00000136720|ENST00000259241	140	-13.6	2	9	2633	2655	7	1	1	ENSG00000136720|ENST00000259241	hsa-miR-181a-5p	0	48	54	48	54	3281	7mer-m8	x	7mer-m8	0		0	HS6ST1	protein_coding
ENSG00000136720	hsa-miR-181b-5p	ENSG00000136720|ENST00000259241	152	-16.24	2	17	2633	2655	15	0.7333	0.8	ENSG00000136720|ENST00000259241	hsa-miR-181b-5p	0	48	54	48	54	3282	7mer-m8	x	7mer-m8	0		0	HS6ST1	protein_coding
ENSG00000055609	hsa-miR-30a-5p	ENSG00000055609|ENST00000262189	140	-9.33	2	9	1394	1415	7	1	1	ENSG00000055609|ENST00000262189	hsa-miR-30a-5p	0	15	21	15	21	3286	7mer-1a	x	7mer-1a	0		0	KMT2C	protein_coding
ENSG00000055609	hsa-miR-30b-5p	ENSG00000055609|ENST00000262189	143	-11.37	2	21	1392	1415	21	0.619	0.6667	ENSG00000055609|ENST00000262189	hsa-miR-30b-5p	0	15	21	15	21	3287	7mer-1a	x	7mer-1a	0		0	KMT2C	protein_coding
ENSG00000055609	hsa-miR-30c-5p	ENSG00000055609|ENST00000262189	144	-12.12	2	22	1387	1415	26	0.6154	0.6154	ENSG00000055609|ENST00000262189	hsa-miR-30c-5p	0	15	21	15	21	3288	7mer-1a	x	7mer-1a	0		0	KMT2C	protein_coding
ENSG00000055609	hsa-miR-30d-5p	ENSG00000055609|ENST00000262189	140	-9.34	2	9	1394	1415	7	1	1	ENSG00000055609|ENST00000262189	hsa-miR-30d-5p	0	15	21	15	21	3289	7mer-1a	x	7mer-1a	0		0	KMT2C	protein_coding
ENSG00000137843	hsa-miR-27a-3p	ENSG00000137843|ENST00000260404	140	-13.07	2	9	519	539	7	1	1	ENSG00000137843|ENST00000260404	hsa-miR-27a-3p	0	29	35	29	35	3293	7mer-1a	x	7mer-1a	0		0	PAK6	protein_coding
ENSG00000137843	hsa-miR-27b-3p	ENSG00000137843|ENST00000260404	140	-13.26	2	9	519	539	7	1	1	ENSG00000137843|ENST00000260404	hsa-miR-27b-3p	0	29	35	29	35	3294	7mer-1a	x	7mer-1a	0		0	PAK6	protein_coding
ENSG00000135373	hsa-miR-128-3p	ENSG00000135373|ENST00000257831	145	-14.31	2	10	2348	2368	8	1	1	ENSG00000135373|ENST00000257831	hsa-miR-128-3p	0	27	33	27	33	3295	7mer-m8	x	7mer-m8	0		0	EHF	protein_coding
ENSG00000011376	hsa-miR-15a-5p	ENSG00000011376|ENST00000265537	156	-19.2	2	20	837	856	18	0.7222	0.8333	ENSG00000011376|ENST00000265537	hsa-miR-15a-5p	0	26	32	26	32	3297	7mer-m8	x	7mer-m8	0		0	LARS2	protein_coding
ENSG00000011376	hsa-miR-15b-5p	ENSG00000011376|ENST00000265537	156	-20.25	2	20	837	856	18	0.7222	0.8333	ENSG00000011376|ENST00000265537	hsa-miR-15b-5p	0	26	32	26	32	3299	7mer-m8	x	7mer-m8	0		0	LARS2	protein_coding
ENSG00000087302	hsa-miR-432-5p	ENSG00000087302|ENST00000261700	156	-16.38	2	21	927	949	19	0.5789	0.8421	ENSG00000087302|ENST00000261700	hsa-miR-432-5p	0	15	21	15	21	3313	7mer-m8	x	7mer-m8	0		0	RTRAF	protein_coding
ENSG00000039139	hsa-miR-27a-3p	ENSG00000039139|ENST00000265104	159	-17.58	2	17	990	1011	16	0.8125	0.875	ENSG00000039139|ENST00000265104	hsa-miR-27a-3p	0	19	25	19	25	3314	7mer-1a	x	7mer-1a	0		0	DNAH5	protein_coding
ENSG00000039139	hsa-miR-27b-3p	ENSG00000039139|ENST00000265104	159	-17.58	2	17	990	1011	16	0.8125	0.875	ENSG00000039139|ENST00000265104	hsa-miR-27b-3p	0	19	25	19	25	3315	7mer-1a	x	7mer-1a	0		0	DNAH5	protein_coding
ENSG00000088179	hsa-miR-26a-5p	ENSG00000088179|ENST00000263708	148	-14.84	2	17	1018	1036	15	0.8	0.8	ENSG00000088179|ENST00000263708	hsa-miR-26a-5p	0	53	59	53	59	3322	7mer-1a	x	7mer-1a	0		0	PTPN4	protein_coding
ENSG00000244754	hsa-miR-126-5p	ENSG00000244754|ENST00000267068	159	-13.12	2	20	5291	5311	18	0.6667	0.8333	ENSG00000244754|ENST00000267068	hsa-miR-126-5p	0	24	29	24	29	3323	6mer	x	6mer	0		0	N4BP2L2	protein_coding
ENSG00000132740	hsa-miR-361-3p	ENSG00000132740|ENST00000255078	166	-31.14	2	19	183	205	17	0.7647	0.8824	ENSG00000132740|ENST00000255078	hsa-miR-361-3p	0	15	21	15	21	3332	7mer-1a	x	7mer-1a	0		0	IGHMBP2	protein_coding
ENSG00000064012	hsa-miR-130a-3p	ENSG00000064012|ENST00000264274	150	-13.14	2	20	378	402	21	0.619	0.7619	ENSG00000064012|ENST00000264274	hsa-miR-130a-3p	0	41	46	41	46	3333	6mer	x	6mer	0		0	CASP8	protein_coding
ENSG00000113594	hsa-miR-664a-5p	ENSG00000113594|ENST00000263409	147	-14.97	2	21	4874	4898	20	0.65	0.7	ENSG00000113594|ENST00000263409	hsa-miR-664a-5p	0	49	54	49	54	3341	6mer	x	6mer	0		0	LIFR	protein_coding
ENSG00000137814	hsa-miR-15a-5p	ENSG00000137814|ENST00000260372	149	-13.08	2	18	70	91	16	0.6875	0.75	ENSG00000137814|ENST00000260372	hsa-miR-15a-5p	0	55	60	55	60	3375	6mer	x	6mer	0		0	HAUS2	protein_coding
ENSG00000137814	hsa-miR-15b-5p	ENSG00000137814|ENST00000260372	146	-11.62	2	21	71	91	19	0.6316	0.7368	ENSG00000137814|ENST00000260372	hsa-miR-15b-5p	0	55	60	55	60	3376	6mer	x	6mer	0		0	HAUS2	protein_coding
ENSG00000135643	hsa-miR-664a-5p	ENSG00000135643|ENST00000258111	141	-16.08	2	10	1567	1590	8	0.875	1	ENSG00000135643|ENST00000258111	hsa-miR-664a-5p	0	48	54	48	54	3388	7mer-1a	x	7mer-1a	0		0	KCNMB4	protein_coding
ENSG00000129474	hsa-miR-361-3p	ENSG00000129474|ENST00000262713	141	-18.45	2	14	908	930	12	0.6667	0.8333	ENSG00000129474|ENST00000262713	hsa-miR-361-3p	0	49	54	49	54	3391	6mer	x	6mer	0		0	AJUBA	protein_coding
ENSG00000083168	hsa-miR-150-5p	ENSG00000083168|ENST00000265713	145	-19.47	2	19	1962	1979	17	0.7059	0.7647	ENSG00000083168|ENST00000265713	hsa-miR-150-5p	0	43	49	43	49	3392	7mer-m8	x	7mer-m8	0		0	KAT6A	protein_coding
ENSG00000118596	hsa-miR-134-5p	ENSG00000118596|ENST00000261187	143	-16.27	2	17	2444	2466	16	0.625	0.8125	ENSG00000118596|ENST00000261187	hsa-miR-134-5p	0	45	50	45	50	3405	6mer	x	6mer	0		0	SLC16A7	protein_coding
ENSG00000108854	hsa-miR-15a-5p	ENSG00000108854|ENST00000262435	142	-11.67	2	11	1747	1768	9	0.8889	0.8889	ENSG00000108854|ENST00000262435	hsa-miR-15a-5p	0	45	50	45	50	3412	6mer	x	6mer	0		0	SMURF2	protein_coding
ENSG00000108854	hsa-miR-15b-5p	ENSG00000108854|ENST00000262435	150	-13.33	2	20	1746	1768	19	0.6316	0.7895	ENSG00000108854|ENST00000262435	hsa-miR-15b-5p	0	45	50	45	50	3413	6mer	x	6mer	0		0	SMURF2	protein_coding
ENSG00000135824	hsa-miR-361-3p	ENSG00000135824|ENST00000258302	165	-29.29	2	19	3869	3892	18	0.7778	0.8889	ENSG00000135824|ENST00000258302	hsa-miR-361-3p	0	45	51	45	51	3455	7mer-m8	x	7mer-m8	0		0	RGS8	protein_coding
ENSG00000074181	hsa-miR-361-3p	ENSG00000074181|ENST00000263388	142	-19.75	2	15	1408	1430	13	0.6923	0.7692	ENSG00000074181|ENST00000263388	hsa-miR-361-3p	0	35	41	35	41	3459	7mer-m8	x	7mer-m8	0		0	NOTCH3	protein_coding
ENSG00000111275	hsa-miR-339-5p	ENSG00000111275|ENST00000261733	151	-17.11	2	18	1039	1060	16	0.6875	0.875	ENSG00000111275|ENST00000261733	hsa-miR-339-5p	0	43	49	43	49	3474	7mer-1a	x	7mer-1a	0		0	ALDH2	protein_coding
ENSG00000135119	hsa-miR-320c	ENSG00000135119|ENST00000257575	144	-11.3	2	13	2350	2369	11	0.7273	0.9091	ENSG00000135119|ENST00000257575	hsa-miR-320c	0	16	21	16	21	3500	6mer	x	6mer	0		0	RNFT2	protein_coding
ENSG00000135119	hsa-miR-320d	ENSG00000135119|ENST00000257575	144	-11.3	2	13	2351	2369	11	0.7273	0.9091	ENSG00000135119|ENST00000257575	hsa-miR-320d	0	16	21	16	21	3501	6mer	x	6mer	0		0	RNFT2	protein_coding
ENSG00000021762	hsa-miR-128-3p	ENSG00000021762|ENST00000263650	140	-15.17	2	9	91	111	7	1	1	ENSG00000021762|ENST00000263650	hsa-miR-128-3p	0	36	41	36	41	3509	6mer	x	6mer	0		0	OSBPL5	protein_coding
ENSG00000156103	hsa-miR-320c	ENSG00000156103|ENST00000286614	165	-18.25	2	18	1018	1037	16	0.8125	0.875	ENSG00000156103|ENST00000286614	hsa-miR-320c	0	55	60	55	60	3530	6mer	x	6mer	0		0	MMP16	protein_coding
ENSG00000156103	hsa-miR-320d	ENSG00000156103|ENST00000286614	165	-18.25	2	18	1019	1037	16	0.8125	0.875	ENSG00000156103|ENST00000286614	hsa-miR-320d	0	55	60	55	60	3531	6mer	x	6mer	0		0	MMP16	protein_coding
ENSG00000167625	hsa-miR-130a-3p	ENSG00000167625|ENST00000301215	142	-20.43	2	11	258	279	9	0.8889	0.8889	ENSG00000167625|ENST00000301215	hsa-miR-130a-3p	0	49	54	49	54	3536	6mer	x	6mer	0		0	ZNF526	protein_coding
ENSG00000108242	hsa-miR-23a-3p	ENSG00000108242|ENST00000285979	140	-8.49	2	9	416	436	7	1	1	ENSG00000108242|ENST00000285979	hsa-miR-23a-3p	0	16	22	16	22	3548	7mer-m8	x	7mer-m8	0		0	CYP2C18	protein_coding
ENSG00000108242	hsa-miR-23b-3p	ENSG00000108242|ENST00000285979	140	-8.44	2	9	414	436	7	1	1	ENSG00000108242|ENST00000285979	hsa-miR-23b-3p	0	16	22	16	22	3549	7mer-m8	x	7mer-m8	0		0	CYP2C18	protein_coding
ENSG00000108242	hsa-miR-23c	ENSG00000108242|ENST00000285979	140	-6.75	2	9	415	436	7	1	1	ENSG00000108242|ENST00000285979	hsa-miR-23c	0	16	22	16	22	3550	7mer-m8	x	7mer-m8	0		0	CYP2C18	protein_coding
ENSG00000162104	hsa-miR-664a-5p	ENSG00000162104|ENST00000294016	148	-27.64	2	23	1486	1508	21	0.5714	0.7619	ENSG00000162104|ENST00000294016	hsa-miR-664a-5p	0	44	49	44	49	3555	6mer	x	6mer	0		0	ADCY9	protein_coding
ENSG00000130703	hsa-miR-128-3p	ENSG00000130703|ENST00000313733	146	-19.35	2	17	51	70	15	0.7333	0.8	ENSG00000130703|ENST00000313733	hsa-miR-128-3p	0	17	23	17	23	3557	7mer-m8	x	7mer-m8	0		0	OSBPL2	protein_coding
ENSG00000154478	hsa-miR-224-5p	ENSG00000154478|ENST00000284674	150	-15.08	2	24	1245	1270	23	0.6522	0.6522	ENSG00000154478|ENST00000284674	hsa-miR-224-5p	0	19	24	19	24	3561	6mer	x	6mer	0		0	GPR26	protein_coding
ENSG00000154478	hsa-miR-7847-3p	ENSG00000154478|ENST00000284674	154	-18.54	2	20	1359	1380	19	0.6316	0.8421	ENSG00000154478|ENST00000284674	hsa-miR-7847-3p	0	47	52	47	52	3562	6mer	x	6mer	0		0	GPR26	protein_coding
ENSG00000166526	hsa-miR-7847-3p	ENSG00000166526|ENST00000303915	152	-25.23	2	17	891	909	15	0.8667	0.8667	ENSG00000166526|ENST00000303915	hsa-miR-7847-3p	0	37	43	37	43	3587	7mer-1a	x	7mer-1a	0		0	ZNF3	protein_coding
ENSG00000011028	hsa-miR-361-3p	ENSG00000011028|ENST00000303375	150	-24.97	2	20	837	855	18	0.7222	0.7778	ENSG00000011028|ENST00000303375	hsa-miR-361-3p	0	52	57	52	57	3588	6mer	x	6mer	0		0	MRC2	protein_coding
ENSG00000180549	hsa-miR-361-3p	ENSG00000180549|ENST00000314412	142	-25.64	2	15	292	314	13	0.6154	0.8462	ENSG00000180549|ENST00000314412	hsa-miR-361-3p	0	23	30	23	30	3600	8mer-1a	x	8mer-1a	0		0	FUT7	protein_coding
ENSG00000156239	hsa-miR-335-5p	ENSG00000156239|ENST00000303775	152	-13.66	2	21	1004	1026	19	0.6842	0.6842	ENSG00000156239|ENST00000303775	hsa-miR-335-5p	0	35	41	35	41	3604	7mer-m8	x	7mer-m8	0		0	N6AMT1	protein_coding
ENSG00000153395	hsa-miR-27a-3p	ENSG00000153395|ENST00000283415	155	-22.7	2	20	1999	2019	18	0.7222	0.7222	ENSG00000153395|ENST00000283415	hsa-miR-27a-3p	0	26	31	26	31	3615	6mer	x	6mer	0		0	LPCAT1	protein_coding
ENSG00000153395	hsa-miR-27b-3p	ENSG00000153395|ENST00000283415	151	-19.9	2	20	1999	2019	18	0.6667	0.7222	ENSG00000153395|ENST00000283415	hsa-miR-27b-3p	0	26	31	26	31	3616	6mer	x	6mer	0		0	LPCAT1	protein_coding
ENSG00000164024	hsa-miR-126-5p	ENSG00000164024|ENST00000296411	150	-10.46	2	16	1294	1315	15	0.7333	0.8667	ENSG00000164024|ENST00000296411	hsa-miR-126-5p	0	46	51	46	51	3667	6mer	x	6mer	0		0	METAP1	protein_coding
ENSG00000084453	hsa-miR-130a-3p	ENSG00000084453|ENST00000307378	144	-14.7	2	13	4262	4283	11	0.7273	0.9091	ENSG00000084453|ENST00000307378	hsa-miR-130a-3p	0	55	60	55	60	3678	6mer	x	6mer	0		0	SLCO1A2	protein_coding
ENSG00000100354	hsa-miR-126-5p	ENSG00000100354|ENST00000301923	149	-4.08	2	19	3495	3516	18	0.6667	0.7778	ENSG00000100354|ENST00000301923	hsa-miR-126-5p	0	32	38	32	38	3693	7mer-m8	x	7mer-m8	0		0	TNRC6B	protein_coding
ENSG00000153147	hsa-miR-339-5p	ENSG00000153147|ENST00000283131	149	-19.75	2	18	2471	2493	16	0.625	0.8125	ENSG00000153147|ENST00000283131	hsa-miR-339-5p	0	53	59	53	59	3700	7mer-1a	x	7mer-1a	0		0	SMARCA5	protein_coding
ENSG00000155304	hsa-miR-126-5p	ENSG00000155304|ENST00000285667	147	-4.76	2	12	401	421	10	0.9	0.9	ENSG00000155304|ENST00000285667	hsa-miR-126-5p	0	16	21	16	21	3719	6mer	x	6mer	0		0	HSPA13	protein_coding
ENSG00000155304	hsa-miR-584-5p	ENSG00000155304|ENST00000285667	140	-12.69	2	9	281	302	7	1	1	ENSG00000155304|ENST00000285667	hsa-miR-584-5p	0	24	30	24	30	3720	7mer-1a	x	7mer-1a	0		0	HSPA13	protein_coding
ENSG00000162989	hsa-miR-27a-3p	ENSG00000162989|ENST00000295101	158	-23.49	2	20	1815	1837	20	0.7	0.8	ENSG00000162989|ENST00000295101	hsa-miR-27a-3p	0	42	47	42	47	3732	6mer	x	6mer	0		0	KCNJ3	protein_coding
ENSG00000162989	hsa-miR-27b-3p	ENSG00000162989|ENST00000295101	155	-18.89	2	20	1817	1837	18	0.6667	0.7778	ENSG00000162989|ENST00000295101	hsa-miR-27b-3p	0	42	47	42	47	3733	6mer	x	6mer	0		0	KCNJ3	protein_coding
ENSG00000163637	hsa-miR-150-5p	ENSG00000163637|ENST00000295902	146	-20.3	2	16	1379	1403	17	0.7059	0.7647	ENSG00000163637|ENST00000295902	hsa-miR-150-5p	0	37	43	37	43	3760	7mer-1a	x	7mer-1a	0		0	PRICKLE2	protein_coding
ENSG00000165156	hsa-miR-335-5p	ENSG00000165156|ENST00000297857	147	-12.94	2	13	1248	1272	13	0.8462	0.8462	ENSG00000165156|ENST00000297857	hsa-miR-335-5p	0	22	27	22	27	3765	6mer	x	6mer	0		0	ZHX1	protein_coding
ENSG00000171055	hsa-miR-432-5p	ENSG00000171055|ENST00000305852	143	-19.25	2	20	10	32	18	0.5	0.7778	ENSG00000171055|ENST00000305852	hsa-miR-432-5p	0	39	45	39	45	3784	7mer-1a	x	7mer-1a	0		0	FEZ2	protein_coding
ENSG00000115602	hsa-miR-320c	ENSG00000115602|ENST00000311734	150	-13.8	2	19	1834	1853	17	0.6471	0.7647	ENSG00000115602|ENST00000311734	hsa-miR-320c	0	44	50	44	50	3788	7mer-m8	x	7mer-m8	0		0	IL1RL1	protein_coding
ENSG00000115602	hsa-miR-320d	ENSG00000115602|ENST00000311734	149	-13.68	2	18	1835	1853	16	0.6875	0.75	ENSG00000115602|ENST00000311734	hsa-miR-320d	0	44	50	44	50	3789	7mer-m8	x	7mer-m8	0		0	IL1RL1	protein_coding
ENSG00000177728	hsa-miR-24-3p	ENSG00000177728|ENST00000314256	144	-20.45	2	17	142	163	15	0.6667	0.7333	ENSG00000177728|ENST00000314256	hsa-miR-24-3p	0	15	20	15	20	3796	6mer	x	6mer	0		0	TMEM94	protein_coding
ENSG00000166960	hsa-miR-15a-5p	ENSG00000166960|ENST00000300227	147	-15.76	2	21	179	201	20	0.6	0.75	ENSG00000166960|ENST00000300227	hsa-miR-15a-5p	0	22	27	22	27	3797	6mer	x	6mer	0		0	CCDC178	protein_coding
ENSG00000166960	hsa-miR-15b-5p	ENSG00000166960|ENST00000300227	143	-14.57	2	19	182	201	17	0.6471	0.7647	ENSG00000166960|ENST00000300227	hsa-miR-15b-5p	0	22	27	22	27	3798	6mer	x	6mer	0		0	CCDC178	protein_coding
ENSG00000166398	hsa-miR-7847-3p	ENSG00000166398|ENST00000299505	167	-31.65	2	20	409	427	18	0.8889	0.8889	ENSG00000166398|ENST00000299505	hsa-miR-7847-3p	0	30	35	30	35	3803	6mer	x	6mer	0		0	GARRE1	protein_coding
ENSG00000167183	hsa-miR-7847-3p	ENSG00000167183|ENST00000300557	152	-21.38	2	19	182	201	17	0.7647	0.7647	ENSG00000167183|ENST00000300557	hsa-miR-7847-3p	0	44	49	44	49	3804	6mer	x	6mer	0		0	PRR15L	protein_coding
ENSG00000244045	hsa-miR-361-3p	ENSG00000244045|ENST00000292114	152	-21.47	2	22	2014	2037	21	0.619	0.7619	ENSG00000244045|ENST00000292114	hsa-miR-361-3p	0	51	56	51	56	3810	6mer	x	6mer	0		0	TMEM199	protein_coding
ENSG00000174791	hsa-miR-339-5p	ENSG00000174791|ENST00000311320	157	-24.82	2	19	683	706	18	0.7778	0.7778	ENSG00000174791|ENST00000311320	hsa-miR-339-5p	0	25	31	25	31	3820	7mer-1a	x	7mer-1a	0		0	RIN1	protein_coding
ENSG00000165899	hsa-miR-126-5p	ENSG00000165899|ENST00000298820	157	-8.03	2	18	576	596	16	0.6875	0.875	ENSG00000165899|ENST00000298820	hsa-miR-126-5p	0	30	35	30	35	3823	6mer	x	6mer	0		0	OTOGL	protein_coding
ENSG00000110274	hsa-miR-224-5p	ENSG00000110274|ENST00000278935	145	-12.09	2	16	92	115	14	0.7857	0.7857	ENSG00000110274|ENST00000278935	hsa-miR-224-5p	0	43	49	43	49	3834	7mer-m8	x	7mer-m8	0		0	CEP164	protein_coding
ENSG00000164327	hsa-miR-142-3p	ENSG00000164327|ENST00000296782	165	-13.75	2	22	526	548	20	0.75	0.75	ENSG00000164327|ENST00000296782	hsa-miR-142-3p	0	39	45	39	45	3857	7mer-1a	x	7mer-1a	0		0	RICTOR	protein_coding
ENSG00000051382	hsa-miR-181a-5p	ENSG00000051382|ENST00000289153	155	-14.27	2	20	1120	1142	18	0.7222	0.7222	ENSG00000051382|ENST00000289153	hsa-miR-181a-5p	0	21	27	21	27	3868	7mer-m8	x	7mer-m8	0		0	PIK3CB	protein_coding
ENSG00000051382	hsa-miR-181b-5p	ENSG00000051382|ENST00000289153	147	-16.29	2	20	1120	1142	18	0.6667	0.6667	ENSG00000051382|ENST00000289153	hsa-miR-181b-5p	0	21	27	21	27	3869	7mer-m8	x	7mer-m8	0		0	PIK3CB	protein_coding
ENSG00000181718	hsa-miR-425-5p	ENSG00000181718|ENST00000313264	148	-14.96	2	13	31	53	11	0.8182	0.9091	ENSG00000181718|ENST00000313264	hsa-miR-425-5p	0	35	41	35	41	3870	7mer-1a	x	7mer-1a	0		0	OR5T2	protein_coding
ENSG00000175182	hsa-miR-23a-3p	ENSG00000175182|ENST00000310585	155	-16.33	2	17	301	322	16	0.75	0.875	ENSG00000175182|ENST00000310585	hsa-miR-23a-3p	0	25	31	25	31	3897	7mer-1a	x	7mer-1a	0		0	FAM131A	protein_coding
ENSG00000175182	hsa-miR-23b-3p	ENSG00000175182|ENST00000310585	155	-16.33	2	17	299	322	16	0.75	0.875	ENSG00000175182|ENST00000310585	hsa-miR-23b-3p	0	25	31	25	31	3898	7mer-1a	x	7mer-1a	0		0	FAM131A	protein_coding
ENSG00000175182	hsa-miR-23c	ENSG00000175182|ENST00000310585	147	-12.14	2	16	301	322	14	0.7143	0.7857	ENSG00000175182|ENST00000310585	hsa-miR-23c	0	25	31	25	31	3899	7mer-1a	x	7mer-1a	0		0	FAM131A	protein_coding
ENSG00000153802	hsa-miR-181a-5p	ENSG00000153802|ENST00000283916	146	-13.03	2	22	176	201	23	0.6957	0.6957	ENSG00000153802|ENST00000283916	hsa-miR-181a-5p	0	16	21	16	21	3916	6mer	x	6mer	0		0	TMPRSS11D	protein_coding
ENSG00000153802	hsa-miR-181b-5p	ENSG00000153802|ENST00000283916	154	-17.5	2	22	179	201	21	0.7143	0.7619	ENSG00000153802|ENST00000283916	hsa-miR-181b-5p	0	16	21	16	21	3917	6mer	x	6mer	0		0	TMPRSS11D	protein_coding
ENSG00000153802	hsa-miR-23a-3p	ENSG00000153802|ENST00000283916	140	-8.75	2	9	520	540	7	1	1	ENSG00000153802|ENST00000283916	hsa-miR-23a-3p	0	17	24	17	24	3918	8mer-1a	x	8mer-1a	0		0	TMPRSS11D	protein_coding
ENSG00000153802	hsa-miR-23b-3p	ENSG00000153802|ENST00000283916	140	-10.91	2	9	518	540	7	1	1	ENSG00000153802|ENST00000283916	hsa-miR-23b-3p	0	17	24	17	24	3919	8mer-1a	x	8mer-1a	0		0	TMPRSS11D	protein_coding
ENSG00000153802	hsa-miR-23c	ENSG00000153802|ENST00000283916	145	-8.92	2	20	520	540	18	0.6667	0.7222	ENSG00000153802|ENST00000283916	hsa-miR-23c	0	17	24	17	24	3920	8mer-1a	x	8mer-1a	0		0	TMPRSS11D	protein_coding
ENSG00000165392	hsa-miR-27a-3p	ENSG00000165392|ENST00000298139	150	-10.98	2	18	768	786	16	0.75	0.8125	ENSG00000165392|ENST00000298139	hsa-miR-27a-3p	0	52	59	52	59	3924	8mer-1a	x	8mer-1a	0		0	WRN	protein_coding
ENSG00000165392	hsa-miR-27b-3p	ENSG00000165392|ENST00000298139	152	-10.98	2	20	768	786	18	0.7222	0.7778	ENSG00000165392|ENST00000298139	hsa-miR-27b-3p	0	52	59	52	59	3925	8mer-1a	x	8mer-1a	0		0	WRN	protein_coding
ENSG00000166793	hsa-miR-361-3p	ENSG00000166793|ENST00000300022	162	-24.75	2	19	217	239	17	0.7647	0.8235	ENSG00000166793|ENST00000300022	hsa-miR-361-3p	0	18	23	18	23	3927	6mer	x	6mer	0		0	YPEL4	protein_coding
ENSG00000175189	hsa-miR-142-5p	ENSG00000175189|ENST00000309668	141	-9.78	2	20	1075	1101	24	0.625	0.6667	ENSG00000175189|ENST00000309668	hsa-miR-142-5p	0	35	41	35	41	3931	7mer-1a	x	7mer-1a	0		0	INHBC	protein_coding
ENSG00000100505	hsa-miR-128-3p	ENSG00000100505|ENST00000298355	140	-13.53	2	9	796	816	7	1	1	ENSG00000100505|ENST00000298355	hsa-miR-128-3p	0	19	24	19	24	3945	6mer	x	6mer	0		0	TRIM9	protein_coding
ENSG00000160445	hsa-miR-29a-3p	ENSG00000160445|ENST00000291900	140	-12.14	2	9	529	550	7	1	1	ENSG00000160445|ENST00000291900	hsa-miR-29a-3p	0	17	23	17	23	3959	7mer-1a	x	7mer-1a	0		0	ZER1	protein_coding
ENSG00000160445	hsa-miR-29b-3p	ENSG00000160445|ENST00000291900	146	-19.29	2	22	520	550	28	0.6429	0.6786	ENSG00000160445|ENST00000291900	hsa-miR-29b-3p	0	17	23	17	23	3960	7mer-1a	x	7mer-1a	0		0	ZER1	protein_coding
ENSG00000160445	hsa-miR-29c-3p	ENSG00000160445|ENST00000291900	140	-11.83	2	9	529	550	7	1	1	ENSG00000160445|ENST00000291900	hsa-miR-29c-3p	0	17	23	17	23	3961	7mer-1a	x	7mer-1a	0		0	ZER1	protein_coding
ENSG00000157193	hsa-miR-181a-5p	ENSG00000157193|ENST00000306052	151	-17.56	2	22	1144	1165	20	0.65	0.75	ENSG00000157193|ENST00000306052	hsa-miR-181a-5p	0	19	24	19	24	3976	6mer	x	6mer	0		0	LRP8	protein_coding
ENSG00000157193	hsa-miR-181b-5p	ENSG00000157193|ENST00000306052	158	-19.25	2	20	1140	1165	21	0.6667	0.8095	ENSG00000157193|ENST00000306052	hsa-miR-181b-5p	0	19	24	19	24	3977	6mer	x	6mer	0		0	LRP8	protein_coding
ENSG00000138100	hsa-miR-361-3p	ENSG00000138100|ENST00000296098	155	-25.47	2	22	206	227	20	0.65	0.8	ENSG00000138100|ENST00000296098	hsa-miR-361-3p	0	16	21	16	21	3993	6mer	x	6mer	0		0	TRIM54	protein_coding
ENSG00000170006	hsa-miR-150-5p	ENSG00000170006|ENST00000304385	140	-15.8	2	9	6453	6474	7	1	1	ENSG00000170006|ENST00000304385	hsa-miR-150-5p	0	49	55	49	55	3998	7mer-1a	x	7mer-1a	0		0	TMEM154	protein_coding
ENSG00000047365	hsa-miR-142-5p	ENSG00000047365|ENST00000303965	143	-7.05	2	12	171	191	10	0.8	0.9	ENSG00000047365|ENST00000303965	hsa-miR-142-5p	0	46	51	46	51	4026	6mer	x	6mer	0		0	ARAP2	protein_coding
ENSG00000180251	hsa-miR-30a-3p	ENSG00000180251|ENST00000295269	145	-9.7	2	15	473	495	14	0.7857	0.7857	ENSG00000180251|ENST00000295269	hsa-miR-30a-3p	0	51	56	51	56	4053	6mer	x	6mer	0		0	SLC9A4	protein_coding
ENSG00000180251	hsa-miR-30e-3p	ENSG00000180251|ENST00000295269	145	-10.49	2	15	473	495	14	0.7857	0.7857	ENSG00000180251|ENST00000295269	hsa-miR-30e-3p	0	51	56	51	56	4054	6mer	x	6mer	0		0	SLC9A4	protein_coding
ENSG00000169519	hsa-miR-584-5p	ENSG00000169519|ENST00000303459	140	-10.97	2	9	1528	1549	7	1	1	ENSG00000169519|ENST00000303459	hsa-miR-584-5p	0	27	33	27	33	4057	7mer-1a	x	7mer-1a	0		0	METTL15	protein_coding
ENSG00000171291	hsa-miR-181a-5p	ENSG00000171291|ENST00000304030	148	-9.67	2	17	398	420	15	0.7333	0.7333	ENSG00000171291|ENST00000304030	hsa-miR-181a-5p	0	31	36	31	36	4065	6mer	x	6mer	0		0	ZNF439	protein_coding
ENSG00000171291	hsa-miR-181b-5p	ENSG00000171291|ENST00000304030	156	-11.97	2	17	398	420	15	0.8	0.8	ENSG00000171291|ENST00000304030	hsa-miR-181b-5p	0	31	36	31	36	4066	6mer	x	6mer	0		0	ZNF439	protein_coding
ENSG00000171291	hsa-miR-425-5p	ENSG00000171291|ENST00000304030	142	-8.86	2	11	884	906	9	0.8889	0.8889	ENSG00000171291|ENST00000304030	hsa-miR-425-5p	0	20	25	20	25	4070	6mer	x	6mer	0		0	ZNF439	protein_coding
ENSG00000164591	hsa-miR-339-5p	ENSG00000164591|ENST00000297130	148	-22.97	2	18	670	693	17	0.7059	0.7647	ENSG00000164591|ENST00000297130	hsa-miR-339-5p	0	26	31	26	31	4086	6mer	x	6mer	0		0	MYOZ3	protein_coding
ENSG00000134824	hsa-miR-320c	ENSG00000134824|ENST00000278840	149	-20.02	2	18	818	837	16	0.6875	0.75	ENSG00000134824|ENST00000278840	hsa-miR-320c	0	33	39	33	39	4105	7mer-m8	x	7mer-m8	0		0	FADS2	protein_coding
ENSG00000134824	hsa-miR-320d	ENSG00000134824|ENST00000278840	149	-18.4	2	18	819	837	16	0.6875	0.75	ENSG00000134824|ENST00000278840	hsa-miR-320d	0	33	39	33	39	4106	7mer-m8	x	7mer-m8	0		0	FADS2	protein_coding
ENSG00000168067	hsa-miR-128-3p	ENSG00000168067|ENST00000294066	144	-16.3	2	13	553	573	11	0.8182	0.8182	ENSG00000168067|ENST00000294066	hsa-miR-128-3p	0	47	52	47	52	4111	6mer	x	6mer	0		0	MAP4K2	protein_coding
ENSG00000168303	hsa-miR-664a-5p	ENSG00000168303|ENST00000306984	144	-22.22	2	22	4312	4338	23	0.6087	0.6522	ENSG00000168303|ENST00000306984	hsa-miR-664a-5p	0	51	56	51	56	4131	6mer	x	6mer	0		0	MPLKIP	protein_coding
ENSG00000141506	hsa-miR-223-3p	ENSG00000141506|ENST00000269300	158	-20.12	2	21	181	201	19	0.7368	0.7895	ENSG00000141506|ENST00000269300	hsa-miR-223-3p	0	33	38	33	38	4145	6mer	x	6mer	0		0	PIK3R5	protein_coding
ENSG00000158079	hsa-miR-27a-3p	ENSG00000158079|ENST00000288976	153	-17.34	2	18	611	631	16	0.6875	0.8125	ENSG00000158079|ENST00000288976	hsa-miR-27a-3p	0	24	31	24	31	4178	8mer-1a	x	8mer-1a	0		0	PTPDC1	protein_coding
ENSG00000158079	hsa-miR-27b-3p	ENSG00000158079|ENST00000288976	153	-17.12	2	18	611	631	16	0.6875	0.8125	ENSG00000158079|ENST00000288976	hsa-miR-27b-3p	0	24	31	24	31	4179	8mer-1a	x	8mer-1a	0		0	PTPDC1	protein_coding
ENSG00000153029	hsa-miR-224-5p	ENSG00000153029|ENST00000282990	148	-18.83	2	22	1197	1222	21	0.5714	0.7619	ENSG00000153029|ENST00000282990	hsa-miR-224-5p	0	46	51	46	51	4198	6mer	x	6mer	0		0	MR1	protein_coding
ENSG00000099338	hsa-miR-26a-5p	ENSG00000099338|ENST00000312265	148	-14.59	2	13	790	811	11	0.8182	0.9091	ENSG00000099338|ENST00000312265	hsa-miR-26a-5p	0	44	50	44	50	4201	7mer-1a	x	7mer-1a	0		0	CATSPERG	protein_coding
ENSG00000145416	hsa-miR-30a-5p	ENSG00000145416|ENST00000274056	162	-16.87	2	16	2980	3002	15	0.8667	0.9333	ENSG00000145416|ENST00000274056	hsa-miR-30a-5p	0	51	57	51	57	4214	7mer-1a	x	7mer-1a	0		0	MARCHF1	protein_coding
ENSG00000145416	hsa-miR-30b-5p	ENSG00000145416|ENST00000274056	155	-12.14	2	16	2981	3002	14	0.7857	0.8571	ENSG00000145416|ENST00000274056	hsa-miR-30b-5p	0	51	57	51	57	4215	7mer-1a	x	7mer-1a	0		0	MARCHF1	protein_coding
ENSG00000145416	hsa-miR-30c-5p	ENSG00000145416|ENST00000274056	155	-12.14	2	16	2980	3002	14	0.7857	0.8571	ENSG00000145416|ENST00000274056	hsa-miR-30c-5p	0	51	57	51	57	4216	7mer-1a	x	7mer-1a	0		0	MARCHF1	protein_coding
ENSG00000145416	hsa-miR-30d-5p	ENSG00000145416|ENST00000274056	154	-12.14	2	16	2980	3002	15	0.8	0.8667	ENSG00000145416|ENST00000274056	hsa-miR-30d-5p	0	51	57	51	57	4217	7mer-1a	x	7mer-1a	0		0	MARCHF1	protein_coding
ENSG00000054793	hsa-miR-339-5p	ENSG00000054793|ENST00000311637	147	-19.87	2	22	2947	2968	20	0.6	0.75	ENSG00000054793|ENST00000311637	hsa-miR-339-5p	0	40	46	40	46	4230	7mer-1a	x	7mer-1a	0		0	ATP9A	protein_coding
ENSG00000154529	hsa-miR-223-3p	ENSG00000154529|ENST00000276974	154	-16.06	2	15	294	315	13	0.8462	0.8462	ENSG00000154529|ENST00000276974	hsa-miR-223-3p	0	28	33	28	33	4246	6mer	x	6mer	0		0	CNTNAP3B	protein_coding
ENSG00000048140	hsa-miR-150-5p	ENSG00000048140|ENST00000310032	152	-17.7	2	21	783	804	19	0.6842	0.6842	ENSG00000048140|ENST00000310032	hsa-miR-150-5p	0	15	21	15	21	4248	7mer-1a	x	7mer-1a	0		0	TSPAN17	protein_coding
ENSG00000158417	hsa-miR-199a-5p	ENSG00000158417|ENST00000289371	141	-12.29	2	21	155	175	19	0.6316	0.6842	ENSG00000158417|ENST00000289371	hsa-miR-199a-5p	0	26	32	26	32	4252	7mer-1a	x	7mer-1a	0		0	EIF5B	protein_coding
ENSG00000139445	hsa-miR-27a-3p	ENSG00000139445|ENST00000299162	153	-15.55	2	19	840	861	18	0.7222	0.7778	ENSG00000139445|ENST00000299162	hsa-miR-27a-3p	0	37	42	37	42	4275	6mer	x	6mer	0		0	FOXN4	protein_coding
ENSG00000139445	hsa-miR-27b-3p	ENSG00000139445|ENST00000299162	158	-17.31	2	20	840	861	19	0.7368	0.7895	ENSG00000139445|ENST00000299162	hsa-miR-27b-3p	0	37	42	37	42	4276	6mer	x	6mer	0		0	FOXN4	protein_coding
ENSG00000165807	hsa-miR-142-5p	ENSG00000165807|ENST00000298705	152	-8.38	2	19	24	43	17	0.7647	0.7647	ENSG00000165807|ENST00000298705	hsa-miR-142-5p	0	43	48	43	48	4284	6mer	x	6mer	0		0	PPP1R36	protein_coding
ENSG00000169676	hsa-miR-320c	ENSG00000169676|ENST00000304374	148	-9.9	2	13	398	417	11	0.8182	0.9091	ENSG00000169676|ENST00000304374	hsa-miR-320c	0	24	29	24	29	4292	6mer	x	6mer	0		0	DRD5	protein_coding
ENSG00000169676	hsa-miR-320d	ENSG00000169676|ENST00000304374	148	-9.9	2	13	399	417	11	0.8182	0.9091	ENSG00000169676|ENST00000304374	hsa-miR-320d	0	24	29	24	29	4293	6mer	x	6mer	0		0	DRD5	protein_coding
ENSG00000140807	hsa-miR-128-3p	ENSG00000140807|ENST00000268459	142	-19.35	2	20	3336	3358	20	0.6	0.7	ENSG00000140807|ENST00000268459	hsa-miR-128-3p	0	15	20	15	20	4297	6mer	x	6mer	0		0	NKD1	protein_coding
ENSG00000183826	hsa-miR-150-5p	ENSG00000183826|ENST00000314100	146	-15.18	2	17	780	800	15	0.7333	0.8	ENSG00000183826|ENST00000314100	hsa-miR-150-5p	0	46	51	46	51	4328	6mer	x	6mer	0		0	BTBD9	protein_coding
ENSG00000183826	hsa-miR-361-3p	ENSG00000183826|ENST00000314100	142	-21.18	2	20	5878	5901	19	0.6316	0.6842	ENSG00000183826|ENST00000314100	hsa-miR-361-3p	0	34	39	34	39	4329	6mer	x	6mer	0		0	BTBD9	protein_coding
ENSG00000078549	hsa-miR-941	ENSG00000078549|ENST00000304166	148	-21.08	2	22	2469	2494	23	0.6087	0.6957	ENSG00000078549|ENST00000304166	hsa-miR-941	0	22	28	22	28	4332	7mer-1a	x	7mer-1a	0		0	ADCYAP1R1	protein_coding
ENSG00000141098	hsa-miR-339-5p	ENSG00000141098|ENST00000268797	146	-21.97	2	21	50	71	19	0.6842	0.6842	ENSG00000141098|ENST00000268797	hsa-miR-339-5p	0	24	30	24	30	4342	7mer-1a	x	7mer-1a	0		0	GFOD2	protein_coding
ENSG00000167232	hsa-miR-155-5p	ENSG00000167232|ENST00000300619	149	-9.21	2	19	908	932	18	0.6667	0.7778	ENSG00000167232|ENST00000300619	hsa-miR-155-5p	0	25	30	25	30	4356	6mer	x	6mer	0		0	ZNF91	protein_coding
ENSG00000163527	hsa-miR-142-5p	ENSG00000163527|ENST00000295770	142	-7.35	2	11	1109	1129	9	0.8889	0.8889	ENSG00000163527|ENST00000295770	hsa-miR-142-5p	0	35	40	35	40	4358	6mer	x	6mer	0		0	STT3B	protein_coding
ENSG00000134955	hsa-miR-15a-5p	ENSG00000134955|ENST00000308074	147	-15.14	2	12	995	1016	10	0.9	0.9	ENSG00000134955|ENST00000308074	hsa-miR-15a-5p	0	55	60	55	60	4401	6mer	x	6mer	0		0	SLC37A2	protein_coding
ENSG00000134955	hsa-miR-15b-5p	ENSG00000134955|ENST00000308074	147	-18.07	2	12	995	1016	10	0.9	0.9	ENSG00000134955|ENST00000308074	hsa-miR-15b-5p	0	55	60	55	60	4402	6mer	x	6mer	0		0	SLC37A2	protein_coding
ENSG00000165959	hsa-miR-199a-5p	ENSG00000165959|ENST00000298912	149	-18.02	2	20	8351	8372	18	0.7222	0.7222	ENSG00000165959|ENST00000298912	hsa-miR-199a-5p	0	39	45	39	45	4413	7mer-m8	x	7mer-m8	0		0	CLMN	protein_coding
ENSG00000165959	hsa-miR-335-5p	ENSG00000165959|ENST00000298912	160	-17.04	2	22	3170	3194	22	0.6818	0.7727	ENSG00000165959|ENST00000298912	hsa-miR-335-5p	0	30	36	30	36	4414	7mer-1a	x	7mer-1a	0		0	CLMN	protein_coding
ENSG00000121644	hsa-miR-224-5p	ENSG00000121644|ENST00000302550	161	-22.54	2	22	1757	1781	20	0.7	0.75	ENSG00000121644|ENST00000302550	hsa-miR-224-5p	0	22	27	22	27	4415	6mer	x	6mer	0		0	DESI2	protein_coding
ENSG00000171860	hsa-miR-15a-5p	ENSG00000171860|ENST00000307637	158	-17.36	2	21	1269	1293	22	0.6818	0.8182	ENSG00000171860|ENST00000307637	hsa-miR-15a-5p	0	20	25	20	25	4416	6mer	x	6mer	0		0	C3AR1	protein_coding
ENSG00000171860	hsa-miR-15b-5p	ENSG00000171860|ENST00000307637	163	-19.15	2	21	1269	1293	22	0.7273	0.7727	ENSG00000171860|ENST00000307637	hsa-miR-15b-5p	0	20	25	20	25	4417	6mer	x	6mer	0		0	C3AR1	protein_coding
ENSG00000154415	hsa-miR-150-5p	ENSG00000154415|ENST00000284602	140	-15.56	2	9	495	516	7	1	1	ENSG00000154415|ENST00000284602	hsa-miR-150-5p	0	33	38	33	38	4428	6mer	x	6mer	0		0	PPP1R3A	protein_coding
ENSG00000154415	hsa-miR-432-5p	ENSG00000154415|ENST00000284602	155	-22.64	2	21	360	385	22	0.6364	0.7727	ENSG00000154415|ENST00000284602	hsa-miR-432-5p	0	42	48	42	48	4431	7mer-m8	x	7mer-m8	0		0	PPP1R3A	protein_coding
ENSG00000078124	hsa-miR-23a-3p	ENSG00000078124|ENST00000278544	146	-12.03	2	20	3079	3097	19	0.7368	0.7368	ENSG00000078124|ENST00000278544	hsa-miR-23a-3p	0	46	51	46	51	4447	6mer	x	6mer	0		0	ACER3	protein_coding
ENSG00000078124	hsa-miR-23b-3p	ENSG00000078124|ENST00000278544	145	-12.2	2	18	3075	3097	16	0.625	0.75	ENSG00000078124|ENST00000278544	hsa-miR-23b-3p	0	46	51	46	51	4448	6mer	x	6mer	0		0	ACER3	protein_coding
ENSG00000078124	hsa-miR-23c	ENSG00000078124|ENST00000278544	150	-13.44	2	18	3078	3097	16	0.75	0.8125	ENSG00000078124|ENST00000278544	hsa-miR-23c	0	46	51	46	51	4449	6mer	x	6mer	0		0	ACER3	protein_coding
ENSG00000092208	hsa-miR-25-3p	ENSG00000092208|ENST00000308317	148	-12.88	2	21	116	137	19	0.6316	0.6842	ENSG00000092208|ENST00000308317	hsa-miR-25-3p	0	43	50	43	50	4488	8mer-1a	x	8mer-1a	0		0	GEMIN2	protein_coding
ENSG00000092208	hsa-miR-92a-3p	ENSG00000092208|ENST00000308317	144	-11.43	2	13	116	137	11	0.8182	0.8182	ENSG00000092208|ENST00000308317	hsa-miR-92a-3p	0	43	50	43	50	4489	8mer-1a	x	8mer-1a	0		0	GEMIN2	protein_coding
ENSG00000145386	hsa-miR-130a-3p	ENSG00000145386|ENST00000274026	159	-19.85	2	21	832	854	20	0.65	0.85	ENSG00000145386|ENST00000274026	hsa-miR-130a-3p	0	15	21	15	21	4514	7mer-m8	x	7mer-m8	0		0	CCNA2	protein_coding
ENSG00000170419	hsa-miR-382-5p	ENSG00000170419|ENST00000302287	142	-14.58	2	16	1369	1392	16	0.625	0.8125	ENSG00000170419|ENST00000302287	hsa-miR-382-5p	0	52	57	52	57	4516	6mer	x	6mer	0		0	VSTM2A	protein_coding
ENSG00000174016	hsa-miR-181a-5p	ENSG00000174016|ENST00000308293	158	-16.61	2	20	776	799	19	0.7368	0.7895	ENSG00000174016|ENST00000308293	hsa-miR-181a-5p	0	29	35	29	35	4517	7mer-1a	x	7mer-1a	0		0	TENT5D	protein_coding
ENSG00000174016	hsa-miR-181b-5p	ENSG00000174016|ENST00000308293	158	-17.28	2	20	776	799	19	0.7368	0.7895	ENSG00000174016|ENST00000308293	hsa-miR-181b-5p	0	29	35	29	35	4518	7mer-1a	x	7mer-1a	0		0	TENT5D	protein_coding
ENSG00000148925	hsa-miR-142-5p	ENSG00000148925|ENST00000278174	144	-7.97	2	13	368	388	11	0.8182	0.8182	ENSG00000148925|ENST00000278174	hsa-miR-142-5p	0	52	57	52	57	4528	6mer	x	6mer	0		0	BTBD10	protein_coding
ENSG00000140557	hsa-miR-128-3p	ENSG00000140557|ENST00000268164	140	-18.76	2	9	2079	2099	7	1	1	ENSG00000140557|ENST00000268164	hsa-miR-128-3p	0	22	27	22	27	4536	6mer	x	6mer	0		0	ST8SIA2	protein_coding
ENSG00000157600	hsa-miR-361-3p	ENSG00000157600|ENST00000288381	157	-26.08	2	22	1878	1900	20	0.6	0.8	ENSG00000157600|ENST00000288381	hsa-miR-361-3p	0	41	46	41	46	4542	6mer	x	6mer	0		0	TMEM164	protein_coding
ENSG00000046889	hsa-miR-142-5p	ENSG00000046889|ENST00000288368	153	-14.07	2	20	3901	3920	18	0.7222	0.7778	ENSG00000046889|ENST00000288368	hsa-miR-142-5p	0	21	26	21	26	4549	6mer	x	6mer	0		0	PREX2	protein_coding
ENSG00000125733	hsa-miR-142-5p	ENSG00000125733|ENST00000313244	146	-5.65	2	15	61	81	13	0.7692	0.7692	ENSG00000125733|ENST00000313244	hsa-miR-142-5p	0	41	46	41	46	4570	6mer	x	6mer	0		0	TRIP10	protein_coding
ENSG00000171303	hsa-miR-146a-5p	ENSG00000171303|ENST00000302909	145	-17.48	2	20	891	911	18	0.6667	0.7222	ENSG00000171303|ENST00000302909	hsa-miR-146a-5p	0	45	50	45	50	4572	6mer	x	6mer	0		0	KCNK3	protein_coding
ENSG00000171303	hsa-miR-146b-5p	ENSG00000171303|ENST00000302909	140	-16.06	2	9	889	911	7	1	1	ENSG00000171303|ENST00000302909	hsa-miR-146b-5p	0	45	50	45	50	4573	6mer	x	6mer	0		0	KCNK3	protein_coding
ENSG00000175029	hsa-miR-335-5p	ENSG00000175029|ENST00000309035	141	-11.77	2	14	1262	1284	12	0.75	0.75	ENSG00000175029|ENST00000309035	hsa-miR-335-5p	0	45	50	45	50	4577	6mer	x	6mer	0		0	CTBP2	protein_coding
ENSG00000164188	hsa-miR-130a-3p	ENSG00000164188|ENST00000296604	150	-11.32	2	15	1686	1707	13	0.7692	0.8462	ENSG00000164188|ENST00000296604	hsa-miR-130a-3p	0	20	25	20	25	4586	6mer	x	6mer	0		0	RANBP3L	protein_coding
ENSG00000170348	hsa-miR-130a-3p	ENSG00000170348|ENST00000303575	142	-16.37	2	11	731	752	9	0.8889	0.8889	ENSG00000170348|ENST00000303575	hsa-miR-130a-3p	0	20	25	20	25	4625	6mer	x	6mer	0		0	TMED10	protein_coding
ENSG00000170348	hsa-miR-148a-3p	ENSG00000170348|ENST00000303575	141	-11.76	2	21	734	753	19	0.6316	0.6842	ENSG00000170348|ENST00000303575	hsa-miR-148a-3p	0	20	26	20	26	4626	7mer-m8	x	7mer-m8	0		0	TMED10	protein_coding
ENSG00000170348	hsa-miR-148b-3p	ENSG00000170348|ENST00000303575	141	-12.44	2	21	734	753	19	0.6316	0.6842	ENSG00000170348|ENST00000303575	hsa-miR-148b-3p	0	20	26	20	26	4627	7mer-m8	x	7mer-m8	0		0	TMED10	protein_coding
ENSG00000106034	hsa-miR-30a-3p	ENSG00000106034|ENST00000310396	151	-11.58	2	21	533	555	20	0.6	0.8	ENSG00000106034|ENST00000310396	hsa-miR-30a-3p	0	42	47	42	47	4634	6mer	x	6mer	0		0	CPED1	protein_coding
ENSG00000106034	hsa-miR-30e-3p	ENSG00000106034|ENST00000310396	155	-11.24	2	21	533	555	20	0.65	0.8	ENSG00000106034|ENST00000310396	hsa-miR-30e-3p	0	42	47	42	47	4635	6mer	x	6mer	0		0	CPED1	protein_coding
ENSG00000141642	hsa-miR-126-5p	ENSG00000141642|ENST00000269466	140	-3.77	2	9	90	110	7	1	1	ENSG00000141642|ENST00000269466	hsa-miR-126-5p	0	54	59	54	59	4637	6mer	x	6mer	0		0	ELAC1	protein_coding
ENSG00000169035	hsa-miR-199a-5p	ENSG00000169035|ENST00000304045	156	-17.23	2	22	629	652	21	0.7143	0.7143	ENSG00000169035|ENST00000304045	hsa-miR-199a-5p	0	46	52	46	52	4638	7mer-1a	x	7mer-1a	0		0	KLK7	protein_coding
ENSG00000145375	hsa-miR-664a-5p	ENSG00000145375|ENST00000274008	144	-17.57	2	22	877	903	23	0.6087	0.6522	ENSG00000145375|ENST00000274008	hsa-miR-664a-5p	0	50	55	50	55	4653	6mer	x	6mer	0		0	SPATA5	protein_coding
ENSG00000161395	hsa-miR-30a-3p	ENSG00000161395|ENST00000300658	141	-11.46	2	15	1602	1625	15	0.6667	0.8	ENSG00000161395|ENST00000300658	hsa-miR-30a-3p	0	19	26	19	26	4663	8mer-1a	x	8mer-1a	0		0	PGAP3	protein_coding
ENSG00000161395	hsa-miR-30e-3p	ENSG00000161395|ENST00000300658	141	-8.55	2	15	1602	1625	15	0.6667	0.8	ENSG00000161395|ENST00000300658	hsa-miR-30e-3p	0	19	26	19	26	4664	8mer-1a	x	8mer-1a	0		0	PGAP3	protein_coding
ENSG00000151327	hsa-miR-150-5p	ENSG00000151327|ENST00000280987	140	-15.8	2	9	1028	1049	7	1	1	ENSG00000151327|ENST00000280987	hsa-miR-150-5p	0	49	54	49	54	4669	6mer	x	6mer	0		0	FAM177A1	protein_coding
ENSG00000115677	hsa-miR-142-5p	ENSG00000115677|ENST00000310931	146	-7.37	2	18	362	380	16	0.75	0.75	ENSG00000115677|ENST00000310931	hsa-miR-142-5p	0	35	40	35	40	4676	6mer	x	6mer	0		0	HDLBP	protein_coding
ENSG00000172345	hsa-miR-26a-5p	ENSG00000172345|ENST00000302824	142	-9.65	2	11	4112	4133	9	0.8889	0.8889	ENSG00000172345|ENST00000302824	hsa-miR-26a-5p	0	18	23	18	23	4681	6mer	x	6mer	0		0	STARD5	protein_coding
ENSG00000152782	hsa-miR-27a-3p	ENSG00000152782|ENST00000307534	145	-16.26	2	20	465	484	18	0.6111	0.7778	ENSG00000152782|ENST00000307534	hsa-miR-27a-3p	0	49	54	49	54	4683	6mer	x	6mer	0		0	PANK1	protein_coding
ENSG00000152782	hsa-miR-27b-3p	ENSG00000152782|ENST00000307534	142	-14.12	2	11	464	484	9	0.7778	1	ENSG00000152782|ENST00000307534	hsa-miR-27b-3p	0	49	54	49	54	4684	6mer	x	6mer	0		0	PANK1	protein_coding
ENSG00000164136	hsa-miR-148a-3p	ENSG00000164136|ENST00000296545	155	-16.12	2	18	293	316	18	0.7778	0.8333	ENSG00000164136|ENST00000296545	hsa-miR-148a-3p	0	47	52	47	52	4707	6mer	x	6mer	0		0	IL15	protein_coding
ENSG00000164136	hsa-miR-148b-3p	ENSG00000164136|ENST00000296545	152	-14.37	2	17	295	316	15	0.7333	0.8	ENSG00000164136|ENST00000296545	hsa-miR-148b-3p	0	47	52	47	52	4708	6mer	x	6mer	0		0	IL15	protein_coding
ENSG00000163879	hsa-miR-126-5p	ENSG00000163879|ENST00000296218	151	-5	2	19	788	808	18	0.7222	0.8333	ENSG00000163879|ENST00000296218	hsa-miR-126-5p	0	52	58	52	58	4732	7mer-m8	x	7mer-m8	0		0	DNALI1	protein_coding
ENSG00000144026	hsa-miR-142-5p	ENSG00000144026|ENST00000295208	147	-6.14	2	20	1881	1901	18	0.6111	0.7222	ENSG00000144026|ENST00000295208	hsa-miR-142-5p	0	45	50	45	50	4734	6mer	x	6mer	0		0	ZNF514	protein_coding
ENSG00000144026	hsa-miR-199a-5p	ENSG00000144026|ENST00000295208	158	-24.32	2	19	3426	3448	17	0.7059	0.8235	ENSG00000144026|ENST00000295208	hsa-miR-199a-5p	0	38	44	38	44	4735	7mer-m8	x	7mer-m8	0		0	ZNF514	protein_coding
ENSG00000196705	hsa-miR-664a-5p	ENSG00000196705|ENST00000311048	141	-15.2	2	10	9329	9352	8	0.875	1	ENSG00000196705|ENST00000311048	hsa-miR-664a-5p	0	28	33	28	33	4741	6mer	x	6mer	0		0	ZNF431	protein_coding
ENSG00000162542	hsa-miR-30a-3p	ENSG00000162542|ENST00000294543	151	-16.63	2	21	116	139	21	0.619	0.7619	ENSG00000162542|ENST00000294543	hsa-miR-30a-3p	0	25	31	25	31	4743	7mer-m8	x	7mer-m8	0		0	TMCO4	protein_coding
ENSG00000162542	hsa-miR-30e-3p	ENSG00000162542|ENST00000294543	151	-14.59	2	21	116	139	21	0.619	0.7619	ENSG00000162542|ENST00000294543	hsa-miR-30e-3p	0	25	31	25	31	4744	7mer-m8	x	7mer-m8	0		0	TMCO4	protein_coding
ENSG00000168672	hsa-miR-150-5p	ENSG00000168672|ENST00000304916	142	-15.42	2	21	2316	2332	19	0.6842	0.6842	ENSG00000168672|ENST00000304916	hsa-miR-150-5p	0	31	37	31	37	4745	7mer-1a	x	7mer-1a	0		0	LRATD2	protein_coding
ENSG00000168672	hsa-miR-7847-3p	ENSG00000168672|ENST00000304916	158	-28.66	2	20	653	672	19	0.8421	0.8421	ENSG00000168672|ENST00000304916	hsa-miR-7847-3p	0	50	56	50	56	4746	7mer-m8	x	7mer-m8	0		0	LRATD2	protein_coding
ENSG00000146670	hsa-miR-664a-5p	ENSG00000146670|ENST00000275517	149	-18.53	2	14	248	271	12	0.8333	0.8333	ENSG00000146670|ENST00000275517	hsa-miR-664a-5p	0	30	35	30	35	4763	6mer	x	6mer	0		0	CDCA5	protein_coding
ENSG00000167291	hsa-miR-191-5p	ENSG00000167291|ENST00000310924	149	-17.08	2	22	3568	3590	20	0.65	0.65	ENSG00000167291|ENST00000310924	hsa-miR-191-5p	0	43	48	43	48	4773	6mer	x	6mer	0		0	TBC1D16	protein_coding
ENSG00000042781	hsa-miR-181a-5p	ENSG00000042781|ENST00000307340	145	-10.05	2	10	2862	2884	8	1	1	ENSG00000042781|ENST00000307340	hsa-miR-181a-5p	0	38	44	38	44	4835	7mer-m8	x	7mer-m8	0		0	USH2A	protein_coding
ENSG00000042781	hsa-miR-181b-5p	ENSG00000042781|ENST00000307340	140	-8.76	2	9	2862	2884	7	1	1	ENSG00000042781|ENST00000307340	hsa-miR-181b-5p	0	38	44	38	44	4836	7mer-m8	x	7mer-m8	0		0	USH2A	protein_coding
ENSG00000124587	hsa-miR-30a-3p	ENSG00000124587|ENST00000304611	150	-13.39	2	21	449	469	19	0.6842	0.7368	ENSG00000124587|ENST00000304611	hsa-miR-30a-3p	0	31	36	31	36	4837	6mer	x	6mer	0		0	PEX6	protein_coding
ENSG00000124587	hsa-miR-30e-3p	ENSG00000124587|ENST00000304611	143	-9.09	2	18	445	469	19	0.6842	0.7368	ENSG00000124587|ENST00000304611	hsa-miR-30e-3p	0	31	36	31	36	4838	6mer	x	6mer	0		0	PEX6	protein_coding
ENSG00000162461	hsa-miR-30a-5p	ENSG00000162461|ENST00000294454	140	-7.15	2	9	1961	1982	7	1	1	ENSG00000162461|ENST00000294454	hsa-miR-30a-5p	0	17	22	17	22	4841	6mer	x	6mer	0		0	SLC25A34	protein_coding
ENSG00000162461	hsa-miR-30b-5p	ENSG00000162461|ENST00000294454	143	-7.08	2	16	1961	1982	14	0.7143	0.7143	ENSG00000162461|ENST00000294454	hsa-miR-30b-5p	0	17	22	17	22	4842	6mer	x	6mer	0		0	SLC25A34	protein_coding
ENSG00000162461	hsa-miR-30c-5p	ENSG00000162461|ENST00000294454	143	-6.02	2	16	1960	1982	14	0.7143	0.7143	ENSG00000162461|ENST00000294454	hsa-miR-30c-5p	0	17	22	17	22	4843	6mer	x	6mer	0		0	SLC25A34	protein_coding
ENSG00000162461	hsa-miR-30d-5p	ENSG00000162461|ENST00000294454	140	-7.03	2	9	1961	1982	7	1	1	ENSG00000162461|ENST00000294454	hsa-miR-30d-5p	0	17	22	17	22	4844	6mer	x	6mer	0		0	SLC25A34	protein_coding
ENSG00000156675	hsa-miR-150-5p	ENSG00000156675|ENST00000287263	141	-14.08	2	21	1200	1219	19	0.6316	0.6842	ENSG00000156675|ENST00000287263	hsa-miR-150-5p	0	17	22	17	22	4877	6mer	x	6mer	0		0	RAB11FIP1	protein_coding
ENSG00000188906	hsa-miR-126-5p	ENSG00000188906|ENST00000298910	155	-10.39	2	18	1113	1132	16	0.8125	0.8125	ENSG00000188906|ENST00000298910	hsa-miR-126-5p	0	27	33	27	33	4915	7mer-m8	x	7mer-m8	0		0	LRRK2	protein_coding
ENSG00000143457	hsa-miR-320c	ENSG00000143457|ENST00000271732	155	-18.76	2	19	958	977	18	0.7778	0.8333	ENSG00000143457|ENST00000271732	hsa-miR-320c	0	43	48	43	48	4926	6mer	x	6mer	0		0	GOLPH3L	protein_coding
ENSG00000143457	hsa-miR-320d	ENSG00000143457|ENST00000271732	152	-18.89	2	14	958	977	13	0.8462	0.9231	ENSG00000143457|ENST00000271732	hsa-miR-320d	0	43	48	43	48	4927	6mer	x	6mer	0		0	GOLPH3L	protein_coding
ENSG00000142621	hsa-miR-425-5p	ENSG00000142621|ENST00000314668	155	-13.16	2	21	42	65	20	0.7	0.75	ENSG00000142621|ENST00000314668	hsa-miR-425-5p	0	38	43	38	43	4928	6mer	x	6mer	0		0	FHAD1	protein_coding
ENSG00000167981	hsa-miR-15a-5p	ENSG00000167981|ENST00000301744	157	-17.97	2	21	1889	1908	19	0.6842	0.8421	ENSG00000167981|ENST00000301744	hsa-miR-15a-5p	0	30	35	30	35	4929	6mer	x	6mer	0		0	ZNF597	protein_coding
ENSG00000167981	hsa-miR-15b-5p	ENSG00000167981|ENST00000301744	161	-18.11	2	21	1889	1908	19	0.7368	0.8421	ENSG00000167981|ENST00000301744	hsa-miR-15b-5p	0	30	35	30	35	4930	6mer	x	6mer	0		0	ZNF597	protein_coding
ENSG00000157601	hsa-miR-223-3p	ENSG00000157601|ENST00000288383	157	-15.36	2	19	292	314	18	0.7778	0.7778	ENSG00000157601|ENST00000288383	hsa-miR-223-3p	0	36	42	36	42	4931	7mer-m8	x	7mer-m8	0		0	MX1	protein_coding
ENSG00000154229	hsa-miR-425-5p	ENSG00000154229|ENST00000284384	148	-17.58	2	22	2113	2138	23	0.6087	0.6957	ENSG00000154229|ENST00000284384	hsa-miR-425-5p	0	49	54	49	54	4955	6mer	x	6mer	0		0	PRKCA	protein_coding
ENSG00000152207	hsa-miR-142-3p	ENSG00000152207|ENST00000282018	147	-14.88	2	21	2213	2236	20	0.65	0.7	ENSG00000152207|ENST00000282018	hsa-miR-142-3p	0	38	43	38	43	4967	6mer	x	6mer	0		0	CYSLTR2	protein_coding
ENSG00000172037	hsa-miR-148a-3p	ENSG00000172037|ENST00000305544	148	-18.26	2	16	42	64	16	0.8125	0.8125	ENSG00000172037|ENST00000305544	hsa-miR-148a-3p	0	47	52	47	52	4970	6mer	x	6mer	0		0	LAMB2	protein_coding
ENSG00000172037	hsa-miR-148b-3p	ENSG00000172037|ENST00000305544	150	-20.04	2	16	42	64	15	0.8	0.8	ENSG00000172037|ENST00000305544	hsa-miR-148b-3p	0	47	52	47	52	4971	6mer	x	6mer	0		0	LAMB2	protein_coding
ENSG00000154370	hsa-miR-15a-5p	ENSG00000154370|ENST00000284551	140	-15.08	2	9	788	809	7	1	1	ENSG00000154370|ENST00000284551	hsa-miR-15a-5p	0	45	50	45	50	4996	6mer	x	6mer	0		0	TRIM11	protein_coding
ENSG00000154370	hsa-miR-15b-5p	ENSG00000154370|ENST00000284551	141	-18.62	2	20	783	809	23	0.6087	0.6957	ENSG00000154370|ENST00000284551	hsa-miR-15b-5p	0	45	50	45	50	4997	6mer	x	6mer	0		0	TRIM11	protein_coding
ENSG00000166278	hsa-miR-24-3p	ENSG00000166278|ENST00000299367	145	-15.96	2	10	1	17	8	1	1	ENSG00000166278|ENST00000299367	hsa-miR-24-3p	0	48	55	48	55	4998	8mer-1a	x	8mer-1a	0		0	C2	protein_coding
ENSG00000163285	hsa-miR-142-5p	ENSG00000163285|ENST00000295452	140	-5.61	2	9	3627	3647	7	1	1	ENSG00000163285|ENST00000295452	hsa-miR-142-5p	0	43	49	43	49	5023	7mer-1a	x	7mer-1a	0		0	GABRG1	protein_coding
ENSG00000143921	hsa-miR-625-3p	ENSG00000143921|ENST00000272286	140	-10.82	2	9	4008	4029	7	1	1	ENSG00000143921|ENST00000272286	hsa-miR-625-3p	0	33	38	33	38	5037	6mer	x	6mer	0		0	ABCG8	protein_coding
ENSG00000148584	hsa-miR-27a-3p	ENSG00000148584|ENST00000282641	144	-13.87	2	13	6135	6155	11	0.8182	0.8182	ENSG00000148584|ENST00000282641	hsa-miR-27a-3p	0	20	25	20	25	5054	6mer	x	6mer	0		0	A1CF	protein_coding
ENSG00000148584	hsa-miR-27b-3p	ENSG00000148584|ENST00000282641	144	-14.4	2	13	6135	6155	11	0.8182	0.8182	ENSG00000148584|ENST00000282641	hsa-miR-27b-3p	0	20	25	20	25	5055	6mer	x	6mer	0		0	A1CF	protein_coding
ENSG00000169031	hsa-miR-196a-5p	ENSG00000169031|ENST00000304990	164	-17.63	2	21	404	425	19	0.7368	0.7895	ENSG00000169031|ENST00000304990	hsa-miR-196a-5p	0	19	24	19	24	5058	6mer	x	6mer	0		0	COL4A3	protein_coding
ENSG00000169031	hsa-miR-196b-5p	ENSG00000169031|ENST00000304990	164	-18.71	2	21	404	425	19	0.7368	0.7895	ENSG00000169031|ENST00000304990	hsa-miR-196b-5p	0	19	24	19	24	5059	6mer	x	6mer	0		0	COL4A3	protein_coding
ENSG00000147416	hsa-miR-335-5p	ENSG00000147416|ENST00000276390	143	-14.29	2	21	5	31	23	0.6087	0.6522	ENSG00000147416|ENST00000276390	hsa-miR-335-5p	0	42	48	42	48	5066	7mer-1a	x	7mer-1a	0		0	ATP6V1B2	protein_coding
ENSG00000069122	hsa-miR-126-5p	ENSG00000069122|ENST00000283296	142	-3.12	2	19	1030	1050	17	0.5882	0.7059	ENSG00000069122|ENST00000283296	hsa-miR-126-5p	0	28	33	28	33	5075	6mer	x	6mer	0		0	ADGRF5	protein_coding
ENSG00000186074	hsa-miR-224-5p	ENSG00000186074|ENST00000301573	142	-17.4	2	16	866	891	15	0.7333	0.7333	ENSG00000186074|ENST00000301573	hsa-miR-224-5p	0	20	26	20	26	5077	7mer-1a	x	7mer-1a	0		0	CD300LF	protein_coding
ENSG00000153832	hsa-miR-29a-3p	ENSG00000153832|ENST00000283946	151	-16.97	2	21	581	603	20	0.7	0.7	ENSG00000153832|ENST00000283946	hsa-miR-29a-3p	0	29	35	29	35	5100	7mer-m8	x	7mer-m8	0		0	FBXO36	protein_coding
ENSG00000153832	hsa-miR-29b-3p	ENSG00000153832|ENST00000283946	155	-14.73	2	21	580	603	20	0.7	0.75	ENSG00000153832|ENST00000283946	hsa-miR-29b-3p	0	29	35	29	35	5101	7mer-m8	x	7mer-m8	0		0	FBXO36	protein_coding
ENSG00000153832	hsa-miR-29c-3p	ENSG00000153832|ENST00000283946	155	-16.97	2	21	581	603	20	0.7	0.75	ENSG00000153832|ENST00000283946	hsa-miR-29c-3p	0	29	35	29	35	5102	7mer-m8	x	7mer-m8	0		0	FBXO36	protein_coding
ENSG00000137834	hsa-miR-7847-3p	ENSG00000137834|ENST00000288840	153	-18.81	2	19	921	942	18	0.6667	0.8333	ENSG00000137834|ENST00000288840	hsa-miR-7847-3p	0	16	21	16	21	5107	6mer	x	6mer	0		0	SMAD6	protein_coding
ENSG00000164484	hsa-miR-224-5p	ENSG00000164484|ENST00000296978	158	-13.36	2	24	710	735	23	0.6087	0.7826	ENSG00000164484|ENST00000296978	hsa-miR-224-5p	0	40	45	40	45	5120	6mer	x	6mer	0		0	TMEM200A	protein_coding
ENSG00000163513	hsa-miR-361-3p	ENSG00000163513|ENST00000295754	154	-21.88	2	19	707	729	17	0.7059	0.7647	ENSG00000163513|ENST00000295754	hsa-miR-361-3p	0	36	41	36	41	5124	6mer	x	6mer	0		0	TGFBR2	protein_coding
ENSG00000145780	hsa-miR-150-5p	ENSG00000145780|ENST00000274457	142	-14.82	2	16	2380	2404	17	0.7059	0.7059	ENSG00000145780|ENST00000274457	hsa-miR-150-5p	0	32	37	32	37	5126	6mer	x	6mer	0		0	FEM1C	protein_coding
ENSG00000174099	hsa-miR-223-3p	ENSG00000174099|ENST00000308259	152	-17.16	2	13	1393	1414	11	0.9091	0.9091	ENSG00000174099|ENST00000308259	hsa-miR-223-3p	0	33	39	33	39	5139	7mer-1a	x	7mer-1a	0		0	MSRB3	protein_coding
ENSG00000145545	hsa-miR-24-3p	ENSG00000145545|ENST00000274192	151	-17.17	2	20	3591	3612	18	0.6667	0.7222	ENSG00000145545|ENST00000274192	hsa-miR-24-3p	0	32	38	32	38	5150	7mer-m8	x	7mer-m8	0		0	SRD5A1	protein_coding
ENSG00000175582	hsa-miR-7847-3p	ENSG00000175582|ENST00000310653	179	-30.56	2	20	1757	1777	18	0.8333	0.9444	ENSG00000175582|ENST00000310653	hsa-miR-7847-3p	0	21	26	21	26	5168	6mer	x	6mer	0		0	RAB6A	protein_coding
ENSG00000175414	hsa-miR-146a-5p	ENSG00000175414|ENST00000310389	150	-12.43	2	21	1386	1411	23	0.6522	0.7391	ENSG00000175414|ENST00000310389	hsa-miR-146a-5p	0	38	43	38	43	5180	6mer	x	6mer	0		0	ARL10	protein_coding
ENSG00000175414	hsa-miR-146b-5p	ENSG00000175414|ENST00000310389	150	-13.15	2	21	1385	1411	23	0.6522	0.7391	ENSG00000175414|ENST00000310389	hsa-miR-146b-5p	0	38	43	38	43	5181	6mer	x	6mer	0		0	ARL10	protein_coding
ENSG00000174839	hsa-miR-30a-3p	ENSG00000174839|ENST00000311128	151	-11.89	2	16	2401	2422	14	0.6429	0.9286	ENSG00000174839|ENST00000311128	hsa-miR-30a-3p	0	29	35	29	35	5185	7mer-1a	x	7mer-1a	0		0	DENND6A	protein_coding
ENSG00000174839	hsa-miR-30e-3p	ENSG00000174839|ENST00000311128	151	-12.4	2	16	2401	2422	14	0.6429	0.9286	ENSG00000174839|ENST00000311128	hsa-miR-30e-3p	0	29	35	29	35	5186	7mer-1a	x	7mer-1a	0		0	DENND6A	protein_coding
ENSG00000166326	hsa-miR-223-3p	ENSG00000166326|ENST00000299413	150	-12.54	2	18	10731	10753	18	0.7778	0.7778	ENSG00000166326|ENST00000299413	hsa-miR-223-3p	0	36	41	36	41	5191	6mer	x	6mer	0		0	TRIM44	protein_coding
ENSG00000153283	hsa-miR-150-5p	ENSG00000153283|ENST00000283285	140	-15.8	2	9	1819	1840	7	1	1	ENSG00000153283|ENST00000283285	hsa-miR-150-5p	0	37	43	37	43	5196	7mer-m8	x	7mer-m8	0		0	CD96	protein_coding
ENSG00000174306	hsa-miR-128-3p	ENSG00000174306|ENST00000309060	159	-19.62	2	20	2760	2780	18	0.7222	0.7778	ENSG00000174306|ENST00000309060	hsa-miR-128-3p	0	28	34	28	34	5199	7mer-m8	x	7mer-m8	0		0	ZHX3	protein_coding
ENSG00000174306	hsa-miR-148a-3p	ENSG00000174306|ENST00000309060	158	-21.16	2	21	2227	2247	19	0.7368	0.7895	ENSG00000174306|ENST00000309060	hsa-miR-148a-3p	0	27	32	27	32	5200	6mer	x	6mer	0		0	ZHX3	protein_coding
ENSG00000174306	hsa-miR-148b-3p	ENSG00000174306|ENST00000309060	158	-22.5	2	21	2227	2247	19	0.7368	0.7895	ENSG00000174306|ENST00000309060	hsa-miR-148b-3p	0	27	32	27	32	5201	6mer	x	6mer	0		0	ZHX3	protein_coding
ENSG00000154016	hsa-miR-744-5p	ENSG00000154016|ENST00000284154	142	-21.78	2	19	262	283	17	0.5882	0.7059	ENSG00000154016|ENST00000284154	hsa-miR-744-5p	0	53	59	53	59	5203	7mer-m8	x	7mer-m8	0		0	GRAP	protein_coding
ENSG00000137076	hsa-miR-744-5p	ENSG00000137076|ENST00000314888	159	-27.28	2	16	119	140	14	0.7857	0.9286	ENSG00000137076|ENST00000314888	hsa-miR-744-5p	0	41	46	41	46	5206	6mer	x	6mer	0		0	TLN1	protein_coding
ENSG00000104228	hsa-miR-30a-5p	ENSG00000104228|ENST00000305364	148	-14.73	2	21	281	302	19	0.6316	0.6842	ENSG00000104228|ENST00000305364	hsa-miR-30a-5p	0	24	29	24	29	5223	6mer	x	6mer	0		0	TRIM35	protein_coding
ENSG00000104228	hsa-miR-30b-5p	ENSG00000104228|ENST00000305364	157	-13.97	2	21	283	302	19	0.7368	0.7895	ENSG00000104228|ENST00000305364	hsa-miR-30b-5p	0	24	29	24	29	5224	6mer	x	6mer	0		0	TRIM35	protein_coding
ENSG00000104228	hsa-miR-30c-5p	ENSG00000104228|ENST00000305364	148	-14.48	2	17	280	302	15	0.7333	0.7333	ENSG00000104228|ENST00000305364	hsa-miR-30c-5p	0	24	29	24	29	5225	6mer	x	6mer	0		0	TRIM35	protein_coding
ENSG00000104228	hsa-miR-30d-5p	ENSG00000104228|ENST00000305364	150	-21.93	2	21	273	302	27	0.6667	0.6667	ENSG00000104228|ENST00000305364	hsa-miR-30d-5p	0	24	29	24	29	5226	6mer	x	6mer	0		0	TRIM35	protein_coding
ENSG00000145536	hsa-miR-27a-3p	ENSG00000145536|ENST00000274181	146	-15.21	2	11	147	167	9	0.8889	1	ENSG00000145536|ENST00000274181	hsa-miR-27a-3p	0	41	46	41	46	5237	6mer	x	6mer	0		0	ADAMTS16	protein_coding
ENSG00000145536	hsa-miR-27b-3p	ENSG00000145536|ENST00000274181	146	-15.21	2	11	147	167	9	0.8889	1	ENSG00000145536|ENST00000274181	hsa-miR-27b-3p	0	41	46	41	46	5238	6mer	x	6mer	0		0	ADAMTS16	protein_coding
ENSG00000165832	hsa-miR-625-3p	ENSG00000165832|ENST00000298746	150	-9.63	2	16	675	697	15	0.8	0.8	ENSG00000165832|ENST00000298746	hsa-miR-625-3p	0	55	60	55	60	5250	6mer	x	6mer	0		0	TRUB1	protein_coding
ENSG00000163933	hsa-miR-320c	ENSG00000163933|ENST00000296292	140	-11.46	2	9	806	825	7	1	1	ENSG00000163933|ENST00000296292	hsa-miR-320c	0	27	33	27	33	5258	7mer-1a	x	7mer-1a	0		0	RFT1	protein_coding
ENSG00000163933	hsa-miR-320d	ENSG00000163933|ENST00000296292	140	-11.01	2	9	807	825	7	1	1	ENSG00000163933|ENST00000296292	hsa-miR-320d	0	27	33	27	33	5259	7mer-1a	x	7mer-1a	0		0	RFT1	protein_coding
ENSG00000115159	hsa-miR-181a-5p	ENSG00000115159|ENST00000310454	146	-12.36	2	20	2831	2854	19	0.5789	0.7895	ENSG00000115159|ENST00000310454	hsa-miR-181a-5p	0	49	54	49	54	5260	6mer	x	6mer	0		0	GPD2	protein_coding
ENSG00000115159	hsa-miR-181b-5p	ENSG00000115159|ENST00000310454	164	-20.71	2	22	73	96	21	0.7143	0.8095	ENSG00000115159|ENST00000310454	hsa-miR-181b-5p	0	49	54	49	54	5261	6mer	x	6mer	0		0	GPD2	protein_coding
ENSG00000157510	hsa-miR-24-3p	ENSG00000157510|ENST00000296721	140	-15.67	2	9	3012	3033	7	1	1	ENSG00000157510|ENST00000296721	hsa-miR-24-3p	0	47	53	47	53	5314	7mer-1a	x	7mer-1a	0		0	AFAP1L1	protein_coding
ENSG00000171456	hsa-miR-224-5p	ENSG00000171456|ENST00000306058	150	-13.66	2	23	1117	1141	21	0.5714	0.7143	ENSG00000171456|ENST00000306058	hsa-miR-224-5p	0	30	35	30	35	5318	6mer	x	6mer	0		0	ASXL1	protein_coding
ENSG00000103365	hsa-miR-142-5p	ENSG00000103365|ENST00000309859	147	-11.07	2	17	3141	3162	16	0.75	0.75	ENSG00000103365|ENST00000309859	hsa-miR-142-5p	0	17	23	17	23	5325	7mer-1a	x	7mer-1a	0		0	GGA2	protein_coding
ENSG00000103365	hsa-miR-625-3p	ENSG00000103365|ENST00000309859	140	-10.15	2	9	2054	2075	7	1	1	ENSG00000103365|ENST00000309859	hsa-miR-625-3p	0	20	25	20	25	5328	6mer	x	6mer	0		0	GGA2	protein_coding
ENSG00000163013	hsa-miR-425-5p	ENSG00000163013|ENST00000295133	142	-13.55	2	11	281	303	9	0.8889	0.8889	ENSG00000163013|ENST00000295133	hsa-miR-425-5p	0	27	32	27	32	5349	6mer	x	6mer	0		0	FBXO41	protein_coding
ENSG00000151615	hsa-miR-320c	ENSG00000151615|ENST00000281321	141	-9.8	2	17	803	820	15	0.6667	0.8	ENSG00000151615|ENST00000281321	hsa-miR-320c	0	49	54	49	54	5354	6mer	x	6mer	0		0	POU4F2	protein_coding
ENSG00000151615	hsa-miR-320d	ENSG00000151615|ENST00000281321	141	-9.71	2	17	804	820	15	0.6667	0.8	ENSG00000151615|ENST00000281321	hsa-miR-320d	0	49	54	49	54	5355	6mer	x	6mer	0		0	POU4F2	protein_coding
ENSG00000148426	hsa-miR-664a-5p	ENSG00000148426|ENST00000277570	152	-21.71	2	18	1075	1101	19	0.7368	0.7368	ENSG00000148426|ENST00000277570	hsa-miR-664a-5p	0	35	40	35	40	5360	6mer	x	6mer	0		0	PROSER2	protein_coding
ENSG00000163684	hsa-miR-425-5p	ENSG00000163684|ENST00000295959	140	-9.27	2	9	526	548	7	1	1	ENSG00000163684|ENST00000295959	hsa-miR-425-5p	0	31	36	31	36	5378	6mer	x	6mer	0		0	RPP14	protein_coding
ENSG00000171016	hsa-miR-146a-5p	ENSG00000171016|ENST00000302000	141	-13.74	2	14	3913	3934	12	0.75	0.75	ENSG00000171016|ENST00000302000	hsa-miR-146a-5p	0	42	48	42	48	5382	7mer-m8	x	7mer-m8	0		0	PYGO1	protein_coding
ENSG00000171016	hsa-miR-146b-5p	ENSG00000171016|ENST00000302000	144	-13.74	2	21	3912	3934	19	0.5789	0.6842	ENSG00000171016|ENST00000302000	hsa-miR-146b-5p	0	42	48	42	48	5383	7mer-m8	x	7mer-m8	0		0	PYGO1	protein_coding
ENSG00000144320	hsa-miR-29a-3p	ENSG00000144320|ENST00000272748	155	-17.83	2	21	4887	4909	20	0.7	0.75	ENSG00000144320|ENST00000272748	hsa-miR-29a-3p	0	26	33	26	33	5397	8mer-1a	x	8mer-1a	0		0	LNPK	protein_coding
ENSG00000144320	hsa-miR-29b-3p	ENSG00000144320|ENST00000272748	167	-18.42	2	21	4886	4909	20	0.8	0.8	ENSG00000144320|ENST00000272748	hsa-miR-29b-3p	0	26	33	26	33	5398	8mer-1a	x	8mer-1a	0		0	LNPK	protein_coding
ENSG00000144320	hsa-miR-29c-3p	ENSG00000144320|ENST00000272748	163	-18.78	2	21	4887	4909	20	0.75	0.8	ENSG00000144320|ENST00000272748	hsa-miR-29c-3p	0	26	33	26	33	5399	8mer-1a	x	8mer-1a	0		0	LNPK	protein_coding
ENSG00000144677	hsa-miR-181a-5p	ENSG00000144677|ENST00000273179	155	-17.82	2	18	106	127	16	0.8125	0.8125	ENSG00000144677|ENST00000273179	hsa-miR-181a-5p	0	43	49	43	49	5408	7mer-m8	x	7mer-m8	0		0	CTDSPL	protein_coding
ENSG00000144677	hsa-miR-181b-5p	ENSG00000144677|ENST00000273179	158	-21.15	2	22	105	127	21	0.7143	0.8095	ENSG00000144677|ENST00000273179	hsa-miR-181b-5p	0	43	49	43	49	5409	7mer-m8	x	7mer-m8	0		0	CTDSPL	protein_coding
ENSG00000138660	hsa-miR-224-5p	ENSG00000138660|ENST00000274000	145	-14.45	2	14	1686	1710	12	0.75	0.8333	ENSG00000138660|ENST00000274000	hsa-miR-224-5p	0	50	55	50	55	5423	6mer	x	6mer	0		0	AP1AR	protein_coding
ENSG00000134769	hsa-miR-23a-3p	ENSG00000134769|ENST00000283365	148	-11.95	2	13	3040	3060	11	0.8182	0.9091	ENSG00000134769|ENST00000283365	hsa-miR-23a-3p	0	16	21	16	21	5436	6mer	x	6mer	0		0	DTNA	protein_coding
ENSG00000134769	hsa-miR-23b-3p	ENSG00000134769|ENST00000283365	148	-12.34	2	13	3038	3060	11	0.8182	0.9091	ENSG00000134769|ENST00000283365	hsa-miR-23b-3p	0	16	21	16	21	5437	6mer	x	6mer	0		0	DTNA	protein_coding
ENSG00000134769	hsa-miR-23c	ENSG00000134769|ENST00000283365	155	-11.66	2	20	3039	3060	18	0.6667	0.7778	ENSG00000134769|ENST00000283365	hsa-miR-23c	0	16	21	16	21	5438	6mer	x	6mer	0		0	DTNA	protein_coding
ENSG00000159423	hsa-miR-27a-3p	ENSG00000159423|ENST00000290597	154	-23.02	2	20	98	119	19	0.7368	0.7368	ENSG00000159423|ENST00000290597	hsa-miR-27a-3p	0	55	60	55	60	5458	6mer	x	6mer	0		0	ALDH4A1	protein_coding
ENSG00000159423	hsa-miR-27b-3p	ENSG00000159423|ENST00000290597	150	-18.16	2	16	98	119	15	0.8	0.8	ENSG00000159423|ENST00000290597	hsa-miR-27b-3p	0	55	60	55	60	5459	6mer	x	6mer	0		0	ALDH4A1	protein_coding
ENSG00000141458	hsa-miR-181a-5p	ENSG00000141458|ENST00000269228	163	-19.27	2	21	267	290	20	0.7	0.85	ENSG00000141458|ENST00000269228	hsa-miR-181a-5p	0	44	50	44	50	5462	7mer-m8	x	7mer-m8	0		0	NPC1	protein_coding
ENSG00000141458	hsa-miR-181b-5p	ENSG00000141458|ENST00000269228	167	-20.69	2	21	267	290	20	0.7	0.9	ENSG00000141458|ENST00000269228	hsa-miR-181b-5p	0	44	50	44	50	5463	7mer-m8	x	7mer-m8	0		0	NPC1	protein_coding
ENSG00000141458	hsa-miR-320c	ENSG00000141458|ENST00000269228	142	-10.69	2	16	111	131	15	0.6	0.8667	ENSG00000141458|ENST00000269228	hsa-miR-320c	0	24	29	24	29	5465	6mer	x	6mer	0		0	NPC1	protein_coding
ENSG00000141458	hsa-miR-320d	ENSG00000141458|ENST00000269228	142	-10.69	2	16	112	131	15	0.6	0.8667	ENSG00000141458|ENST00000269228	hsa-miR-320d	0	24	29	24	29	5466	6mer	x	6mer	0		0	NPC1	protein_coding
ENSG00000162944	hsa-miR-30a-5p	ENSG00000162944|ENST00000295049	146	-11.87	2	21	183	206	21	0.6667	0.7143	ENSG00000162944|ENST00000295049	hsa-miR-30a-5p	0	20	27	20	27	5470	8mer-1a	x	8mer-1a	0		0	RFTN2	protein_coding
ENSG00000162944	hsa-miR-30b-5p	ENSG00000162944|ENST00000295049	146	-9.33	2	15	185	206	13	0.7692	0.7692	ENSG00000162944|ENST00000295049	hsa-miR-30b-5p	0	20	27	20	27	5471	8mer-1a	x	8mer-1a	0		0	RFTN2	protein_coding
ENSG00000162944	hsa-miR-30c-5p	ENSG00000162944|ENST00000295049	146	-9.33	2	15	184	206	13	0.7692	0.7692	ENSG00000162944|ENST00000295049	hsa-miR-30c-5p	0	20	27	20	27	5472	8mer-1a	x	8mer-1a	0		0	RFTN2	protein_coding
ENSG00000162944	hsa-miR-30d-5p	ENSG00000162944|ENST00000295049	145	-11.87	2	10	185	206	8	1	1	ENSG00000162944|ENST00000295049	hsa-miR-30d-5p	0	20	27	20	27	5473	8mer-1a	x	8mer-1a	0		0	RFTN2	protein_coding
ENSG00000173480	hsa-miR-432-5p	ENSG00000173480|ENST00000312026	168	-22.75	2	22	689	712	21	0.7619	0.8095	ENSG00000173480|ENST00000312026	hsa-miR-432-5p	0	35	41	35	41	5500	7mer-1a	x	7mer-1a	0		0	ZNF417	protein_coding
ENSG00000172340	hsa-miR-181a-5p	ENSG00000172340|ENST00000307227	145	-9.19	2	10	882	904	8	1	1	ENSG00000172340|ENST00000307227	hsa-miR-181a-5p	0	43	48	43	48	5501	6mer	x	6mer	0		0	SUCLG2	protein_coding
ENSG00000172340	hsa-miR-181b-5p	ENSG00000172340|ENST00000307227	140	-8.55	2	9	882	904	7	1	1	ENSG00000172340|ENST00000307227	hsa-miR-181b-5p	0	43	48	43	48	5502	6mer	x	6mer	0		0	SUCLG2	protein_coding
ENSG00000166716	hsa-miR-126-5p	ENSG00000166716|ENST00000299927	140	-5.65	2	9	1724	1744	7	1	1	ENSG00000166716|ENST00000299927	hsa-miR-126-5p	0	51	58	51	58	5506	8mer-1a	x	8mer-1a	0		0	ZNF592	protein_coding
ENSG00000133703	hsa-miR-134-5p	ENSG00000133703|ENST00000311936	146	-19.94	2	11	2569	2590	9	0.8889	1	ENSG00000133703|ENST00000311936	hsa-miR-134-5p	0	34	40	34	40	5525	7mer-m8	x	7mer-m8	0		0	KRAS	protein_coding
ENSG00000111837	hsa-miR-15a-5p	ENSG00000111837|ENST00000313243	156	-22.37	2	21	1194	1215	19	0.6842	0.7368	ENSG00000111837|ENST00000313243	hsa-miR-15a-5p	0	44	50	44	50	5535	7mer-m8	x	7mer-m8	0		0	MAK	protein_coding
ENSG00000111837	hsa-miR-15b-5p	ENSG00000111837|ENST00000313243	152	-19.4	2	20	1194	1215	19	0.7368	0.7895	ENSG00000111837|ENST00000313243	hsa-miR-15b-5p	0	44	50	44	50	5537	7mer-m8	x	7mer-m8	0		0	MAK	protein_coding
ENSG00000143079	hsa-miR-432-5p	ENSG00000143079|ENST00000271277	150	-17.95	2	22	935	964	27	0.6667	0.7037	ENSG00000143079|ENST00000271277	hsa-miR-432-5p	0	53	58	53	58	5565	6mer	x	6mer	0		0	CTTNBP2NL	protein_coding
ENSG00000145936	hsa-miR-223-3p	ENSG00000145936|ENST00000274629	140	-8.64	2	9	250	271	7	1	1	ENSG00000145936|ENST00000274629	hsa-miR-223-3p	0	49	55	49	55	5571	7mer-1a	x	7mer-1a	0		0	KCNMB1	protein_coding
ENSG00000160917	hsa-miR-24-3p	ENSG00000160917|ENST00000292476	151	-22.78	2	17	747	770	17	0.7647	0.7647	ENSG00000160917|ENST00000292476	hsa-miR-24-3p	0	16	22	16	22	5593	7mer-m8	x	7mer-m8	0		0	CPSF4	protein_coding
ENSG00000087995	hsa-miR-99b-5p	ENSG00000087995|ENST00000311506	153	-17.59	2	16	3393	3413	14	0.8571	0.8571	ENSG00000087995|ENST00000311506	hsa-miR-99b-5p	0	29	34	29	34	5599	6mer	x	6mer	0		0	METTL2A	protein_coding
ENSG00000186318	hsa-miR-24-3p	ENSG00000186318|ENST00000313005	143	-18.7	2	14	4031	4054	14	0.7857	0.8571	ENSG00000186318|ENST00000313005	hsa-miR-24-3p	0	29	35	29	35	5618	7mer-m8	x	7mer-m8	0		0	BACE1	protein_coding
ENSG00000143870	hsa-miR-150-5p	ENSG00000143870|ENST00000272227	140	-11.74	2	9	22	43	7	1	1	ENSG00000143870|ENST00000272227	hsa-miR-150-5p	0	19	24	19	24	5623	6mer	x	6mer	0		0	PDIA6	protein_coding
ENSG00000113448	hsa-miR-30a-5p	ENSG00000113448|ENST00000309641	151	-16.48	2	21	645	668	21	0.6667	0.7143	ENSG00000113448|ENST00000309641	hsa-miR-30a-5p	0	50	55	50	55	5629	6mer	x	6mer	0		0	PDE4D	protein_coding
ENSG00000113448	hsa-miR-30b-5p	ENSG00000113448|ENST00000309641	150	-16.63	2	16	645	668	16	0.75	0.8125	ENSG00000113448|ENST00000309641	hsa-miR-30b-5p	0	50	55	50	55	5630	6mer	x	6mer	0		0	PDE4D	protein_coding
ENSG00000113448	hsa-miR-30c-5p	ENSG00000113448|ENST00000309641	150	-16.23	2	16	644	668	16	0.75	0.8125	ENSG00000113448|ENST00000309641	hsa-miR-30c-5p	0	50	55	50	55	5631	6mer	x	6mer	0		0	PDE4D	protein_coding
ENSG00000113448	hsa-miR-30d-5p	ENSG00000113448|ENST00000309641	146	-15.94	2	21	648	668	19	0.5789	0.7895	ENSG00000113448|ENST00000309641	hsa-miR-30d-5p	0	50	55	50	55	5632	6mer	x	6mer	0		0	PDE4D	protein_coding
ENSG00000144579	hsa-miR-361-3p	ENSG00000144579|ENST00000273062	152	-28.99	2	21	230	249	19	0.6842	0.7895	ENSG00000144579|ENST00000273062	hsa-miR-361-3p	0	38	45	38	45	5661	8mer-1a	x	8mer-1a	0		0	CTDSP1	protein_coding
ENSG00000145721	hsa-miR-320c	ENSG00000145721|ENST00000274382	145	-17.69	2	19	2119	2140	19	0.6316	0.7368	ENSG00000145721|ENST00000274382	hsa-miR-320c	0	47	52	47	52	5691	6mer	x	6mer	0		0	LIX1	protein_coding
ENSG00000145721	hsa-miR-320d	ENSG00000145721|ENST00000274382	141	-13.87	2	10	2122	2140	8	0.875	1	ENSG00000145721|ENST00000274382	hsa-miR-320d	0	47	52	47	52	5692	6mer	x	6mer	0		0	LIX1	protein_coding
ENSG00000137731	hsa-miR-23a-3p	ENSG00000137731|ENST00000292079	150	-18.8	2	20	133	155	20	0.65	0.75	ENSG00000137731|ENST00000292079	hsa-miR-23a-3p	0	21	27	21	27	5712	7mer-1a	x	7mer-1a	0		0	FXYD2	protein_coding
ENSG00000137731	hsa-miR-23b-3p	ENSG00000137731|ENST00000292079	152	-16.2	2	22	131	155	22	0.6364	0.7273	ENSG00000137731|ENST00000292079	hsa-miR-23b-3p	0	21	27	21	27	5713	7mer-1a	x	7mer-1a	0		0	FXYD2	protein_coding
ENSG00000137731	hsa-miR-23c	ENSG00000137731|ENST00000292079	147	-10.68	2	15	136	155	13	0.8462	0.8462	ENSG00000137731|ENST00000292079	hsa-miR-23c	0	21	27	21	27	5714	7mer-1a	x	7mer-1a	0		0	FXYD2	protein_coding
ENSG00000144746	hsa-miR-15a-5p	ENSG00000144746|ENST00000273258	175	-20.71	2	20	1271	1292	18	0.8333	0.8889	ENSG00000144746|ENST00000273258	hsa-miR-15a-5p	0	26	32	26	32	5728	7mer-m8	x	7mer-m8	0		0	ARL6IP5	protein_coding
ENSG00000144746	hsa-miR-15b-5p	ENSG00000144746|ENST00000273258	183	-26.03	2	20	1271	1292	18	0.8889	0.9444	ENSG00000144746|ENST00000273258	hsa-miR-15b-5p	0	26	32	26	32	5729	7mer-m8	x	7mer-m8	0		0	ARL6IP5	protein_coding
ENSG00000161681	hsa-miR-126-5p	ENSG00000161681|ENST00000293441	140	-8.56	2	9	1270	1290	7	1	1	ENSG00000161681|ENST00000293441	hsa-miR-126-5p	0	30	36	30	36	5740	7mer-1a	x	7mer-1a	0		0	SHANK1	protein_coding
ENSG00000171466	hsa-miR-150-5p	ENSG00000171466|ENST00000293648	143	-14.82	2	17	6035	6058	17	0.7059	0.7059	ENSG00000171466|ENST00000293648	hsa-miR-150-5p	0	25	31	25	31	5758	7mer-1a	x	7mer-1a	0		0	ZNF562	protein_coding
ENSG00000166454	hsa-miR-146a-5p	ENSG00000166454|ENST00000299575	142	-11.76	2	11	1664	1685	9	0.8889	0.8889	ENSG00000166454|ENST00000299575	hsa-miR-146a-5p	0	31	37	31	37	5760	7mer-1a	x	7mer-1a	0		0	ATMIN	protein_coding
ENSG00000166454	hsa-miR-146b-5p	ENSG00000166454|ENST00000299575	142	-21.01	2	11	1663	1685	9	0.8889	0.8889	ENSG00000166454|ENST00000299575	hsa-miR-146b-5p	0	31	37	31	37	5761	7mer-1a	x	7mer-1a	0		0	ATMIN	protein_coding
ENSG00000172575	hsa-miR-126-5p	ENSG00000172575|ENST00000310803	157	-5.84	2	18	1203	1223	16	0.6875	0.875	ENSG00000172575|ENST00000310803	hsa-miR-126-5p	0	24	30	24	30	5784	7mer-m8	x	7mer-m8	0		0	RASGRP1	protein_coding
ENSG00000172403	hsa-miR-25-3p	ENSG00000172403|ENST00000307142	157	-21.07	2	19	576	599	19	0.7368	0.7895	ENSG00000172403|ENST00000307142	hsa-miR-25-3p	0	39	46	39	46	5800	8mer-1a	x	8mer-1a	0		0	SYNPO2	protein_coding
ENSG00000172403	hsa-miR-92a-3p	ENSG00000172403|ENST00000307142	147	-20.43	2	21	582	599	19	0.6842	0.7368	ENSG00000172403|ENST00000307142	hsa-miR-92a-3p	0	39	46	39	46	5801	8mer-1a	x	8mer-1a	0		0	SYNPO2	protein_coding
ENSG00000118965	hsa-miR-126-5p	ENSG00000118965|ENST00000281405	156	-13.64	2	17	425	445	15	0.8	0.8	ENSG00000118965|ENST00000281405	hsa-miR-126-5p	0	19	25	19	25	5805	7mer-m8	x	7mer-m8	0		0	WDR35	protein_coding
ENSG00000171928	hsa-miR-30a-5p	ENSG00000171928|ENST00000307767	146	-10.23	2	18	378	399	17	0.7647	0.7647	ENSG00000171928|ENST00000307767	hsa-miR-30a-5p	0	27	32	27	32	5820	6mer	x	6mer	0		0	TVP23B	protein_coding
ENSG00000171928	hsa-miR-30b-5p	ENSG00000171928|ENST00000307767	146	-11.13	2	18	378	399	17	0.7647	0.7647	ENSG00000171928|ENST00000307767	hsa-miR-30b-5p	0	27	32	27	32	5821	6mer	x	6mer	0		0	TVP23B	protein_coding
ENSG00000171928	hsa-miR-30c-5p	ENSG00000171928|ENST00000307767	150	-9.97	2	22	377	399	21	0.7143	0.7143	ENSG00000171928|ENST00000307767	hsa-miR-30c-5p	0	27	32	27	32	5822	6mer	x	6mer	0		0	TVP23B	protein_coding
ENSG00000171928	hsa-miR-30d-5p	ENSG00000171928|ENST00000307767	145	-10.94	2	10	378	399	8	1	1	ENSG00000171928|ENST00000307767	hsa-miR-30d-5p	0	27	32	27	32	5823	6mer	x	6mer	0		0	TVP23B	protein_coding
ENSG00000135446	hsa-miR-30a-3p	ENSG00000135446|ENST00000312990	140	-9.48	2	9	663	684	7	1	1	ENSG00000135446|ENST00000312990	hsa-miR-30a-3p	0	26	31	26	31	5827	6mer	x	6mer	0		0	CDK4	protein_coding
ENSG00000135446	hsa-miR-30e-3p	ENSG00000135446|ENST00000312990	140	-9.58	2	9	663	684	7	1	1	ENSG00000135446|ENST00000312990	hsa-miR-30e-3p	0	26	31	26	31	5828	6mer	x	6mer	0		0	CDK4	protein_coding
ENSG00000154429	hsa-miR-130a-3p	ENSG00000154429|ENST00000284617	151	-11.66	2	16	912	933	14	0.7143	0.8571	ENSG00000154429|ENST00000284617	hsa-miR-130a-3p	0	27	32	27	32	5840	6mer	x	6mer	0		0	CCSAP	protein_coding
ENSG00000145331	hsa-miR-126-5p	ENSG00000145331|ENST00000273962	161	-7.61	2	20	124	143	18	0.7778	0.8333	ENSG00000145331|ENST00000273962	hsa-miR-126-5p	0	44	49	44	49	5853	6mer	x	6mer	0		0	TRMT10A	protein_coding
ENSG00000164855	hsa-miR-223-3p	ENSG00000164855|ENST00000297477	146	-15.69	2	20	2076	2100	21	0.6667	0.6667	ENSG00000164855|ENST00000297477	hsa-miR-223-3p	0	28	33	28	33	5872	6mer	x	6mer	0		0	TMEM184A	protein_coding
ENSG00000164104	hsa-miR-181a-5p	ENSG00000164104|ENST00000296503	155	-19.77	2	21	209	232	20	0.7	0.75	ENSG00000164104|ENST00000296503	hsa-miR-181a-5p	0	21	28	21	28	5894	8mer-1a	x	8mer-1a	0		0	HMGB2	protein_coding
ENSG00000164104	hsa-miR-181b-5p	ENSG00000164104|ENST00000296503	144	-14.93	2	22	213	232	20	0.6	0.8	ENSG00000164104|ENST00000296503	hsa-miR-181b-5p	0	21	28	21	28	5895	8mer-1a	x	8mer-1a	0		0	HMGB2	protein_coding
ENSG00000140832	hsa-miR-24-3p	ENSG00000140832|ENST00000268485	142	-17.17	2	15	34	55	13	0.6923	0.7692	ENSG00000140832|ENST00000268485	hsa-miR-24-3p	0	55	60	55	60	5916	6mer	x	6mer	0		0	MARVELD3	protein_coding
ENSG00000167548	hsa-miR-7847-3p	ENSG00000167548|ENST00000301067	159	-24.96	2	20	2634	2654	18	0.7222	0.7778	ENSG00000167548|ENST00000301067	hsa-miR-7847-3p	0	29	34	29	34	5919	6mer	x	6mer	0		0	KMT2D	protein_coding
ENSG00000072803	hsa-miR-150-5p	ENSG00000072803|ENST00000296933	140	-14.11	2	9	2068	2089	7	1	1	ENSG00000072803|ENST00000296933	hsa-miR-150-5p	0	48	54	48	54	5934	7mer-m8	x	7mer-m8	0		0	FBXW11	protein_coding
ENSG00000087111	hsa-miR-15a-5p	ENSG00000087111|ENST00000268758	143	-16.34	2	21	319	341	20	0.6	0.7	ENSG00000087111|ENST00000268758	hsa-miR-15a-5p	0	29	34	29	34	5942	6mer	x	6mer	0		0	PIGS	protein_coding
ENSG00000087111	hsa-miR-15b-5p	ENSG00000087111|ENST00000268758	149	-18.4	2	20	321	341	18	0.6111	0.8333	ENSG00000087111|ENST00000268758	hsa-miR-15b-5p	0	29	34	29	34	5943	6mer	x	6mer	0		0	PIGS	protein_coding
ENSG00000146856	hsa-miR-335-5p	ENSG00000146856|ENST00000275763	146	-14.09	2	12	689	712	11	0.9091	0.9091	ENSG00000146856|ENST00000275763	hsa-miR-335-5p	0	31	36	31	36	5949	6mer	x	6mer	0		0	AGBL3	protein_coding
ENSG00000157657	hsa-miR-27a-3p	ENSG00000157657|ENST00000288466	143	-13.24	2	18	1890	1912	18	0.6667	0.7778	ENSG00000157657|ENST00000288466	hsa-miR-27a-3p	0	38	43	38	43	5984	6mer	x	6mer	0		0	ZNF618	protein_coding
ENSG00000157657	hsa-miR-27b-3p	ENSG00000157657|ENST00000288466	145	-16.01	2	20	1890	1912	20	0.65	0.75	ENSG00000157657|ENST00000288466	hsa-miR-27b-3p	0	38	43	38	43	5985	6mer	x	6mer	0		0	ZNF618	protein_coding
ENSG00000169918	hsa-miR-361-3p	ENSG00000169918|ENST00000307050	142	-23.02	2	19	970	992	17	0.5294	0.7647	ENSG00000169918|ENST00000307050	hsa-miR-361-3p	0	55	60	55	60	5988	6mer	x	6mer	0		0	OTUD7A	protein_coding
ENSG00000159592	hsa-miR-23a-3p	ENSG00000159592|ENST00000290795	147	-14.07	2	12	840	860	10	0.9	0.9	ENSG00000159592|ENST00000290795	hsa-miR-23a-3p	0	45	51	45	51	5990	7mer-1a	x	7mer-1a	0		0	GPBP1L1	protein_coding
ENSG00000159592	hsa-miR-23b-3p	ENSG00000159592|ENST00000290795	147	-12.24	2	12	838	860	10	0.9	0.9	ENSG00000159592|ENST00000290795	hsa-miR-23b-3p	0	45	51	45	51	5991	7mer-1a	x	7mer-1a	0		0	GPBP1L1	protein_coding
ENSG00000159592	hsa-miR-23c	ENSG00000159592|ENST00000290795	147	-13.49	2	12	839	860	10	0.9	0.9	ENSG00000159592|ENST00000290795	hsa-miR-23c	0	45	51	45	51	5992	7mer-1a	x	7mer-1a	0		0	GPBP1L1	protein_coding
ENSG00000163254	hsa-miR-142-3p	ENSG00000163254|ENST00000282141	147	-11.4	2	17	1	17	16	0.75	0.75	ENSG00000163254|ENST00000282141	hsa-miR-142-3p	0	20	25	20	25	6016	6mer	x	6mer	0		0	CRYGC	protein_coding
ENSG00000187672	hsa-miR-130a-3p	ENSG00000187672|ENST00000288221	154	-20.75	2	21	1885	1912	25	0.68	0.72	ENSG00000187672|ENST00000288221	hsa-miR-130a-3p	0	31	36	31	36	6024	6mer	x	6mer	0		0	ERC2	protein_coding
ENSG00000187098	hsa-miR-221-3p	ENSG00000187098|ENST00000314589	157	-16.33	2	22	1665	1687	20	0.65	0.75	ENSG00000187098|ENST00000314589	hsa-miR-221-3p	0	33	40	33	40	6029	8mer-1a	x	8mer-1a	0		0	MITF	protein_coding
ENSG00000187098	hsa-miR-30a-3p	ENSG00000187098|ENST00000314589	140	-13.03	2	9	784	805	7	1	1	ENSG00000187098|ENST00000314589	hsa-miR-30a-3p	0	51	57	51	57	6030	7mer-1a	x	7mer-1a	0		0	MITF	protein_coding
ENSG00000187098	hsa-miR-30e-3p	ENSG00000187098|ENST00000314589	143	-12.77	2	19	786	805	17	0.6471	0.7647	ENSG00000187098|ENST00000314589	hsa-miR-30e-3p	0	51	57	51	57	6031	7mer-1a	x	7mer-1a	0		0	MITF	protein_coding
ENSG00000169435	hsa-miR-192-5p	ENSG00000169435|ENST00000307439	145	-15.73	2	20	3891	3916	23	0.6087	0.7391	ENSG00000169435|ENST00000307439	hsa-miR-192-5p	0	18	24	18	24	6038	7mer-m8	x	7mer-m8	0		0	RASSF6	protein_coding
ENSG00000169435	hsa-miR-215-5p	ENSG00000169435|ENST00000307439	145	-17.93	2	20	3891	3916	23	0.6087	0.7391	ENSG00000169435|ENST00000307439	hsa-miR-215-5p	0	18	24	18	24	6039	7mer-m8	x	7mer-m8	0		0	RASSF6	protein_coding
ENSG00000142920	hsa-miR-335-5p	ENSG00000142920|ENST00000294517	140	-13.11	2	9	3153	3175	7	1	1	ENSG00000142920|ENST00000294517	hsa-miR-335-5p	0	54	59	54	59	6066	6mer	x	6mer	0		0	AZIN2	protein_coding
ENSG00000166831	hsa-miR-150-5p	ENSG00000166831|ENST00000300069	147	-20.16	2	21	1008	1032	22	0.6364	0.6818	ENSG00000166831|ENST00000300069	hsa-miR-150-5p	0	39	44	39	44	6085	6mer	x	6mer	0		0	RBPMS2	protein_coding
ENSG00000169085	hsa-miR-150-5p	ENSG00000169085|ENST00000305454	146	-23.02	2	21	213	239	24	0.625	0.7083	ENSG00000169085|ENST00000305454	hsa-miR-150-5p	0	35	40	35	40	6144	6mer	x	6mer	0		0	VXN	protein_coding
ENSG00000150893	hsa-miR-24-3p	ENSG00000150893|ENST00000280481	164	-25.31	2	21	860	881	19	0.7368	0.7895	ENSG00000150893|ENST00000280481	hsa-miR-24-3p	0	17	23	17	23	6151	7mer-m8	x	7mer-m8	0		0	FREM2	protein_coding
ENSG00000169641	hsa-miR-150-5p	ENSG00000169641|ENST00000302291	148	-17.34	2	17	2695	2716	15	0.7333	0.7333	ENSG00000169641|ENST00000302291	hsa-miR-150-5p	0	33	38	33	38	6158	6mer	x	6mer	0		0	LUZP1	protein_coding
ENSG00000170892	hsa-miR-27a-3p	ENSG00000170892|ENST00000302937	152	-16.41	2	17	194	214	15	0.7333	0.8	ENSG00000170892|ENST00000302937	hsa-miR-27a-3p	0	24	29	24	29	6170	6mer	x	6mer	0		0	TSEN34	protein_coding
ENSG00000170892	hsa-miR-27b-3p	ENSG00000170892|ENST00000302937	152	-16.41	2	17	194	214	15	0.7333	0.8	ENSG00000170892|ENST00000302937	hsa-miR-27b-3p	0	24	29	24	29	6171	6mer	x	6mer	0		0	TSEN34	protein_coding
ENSG00000126016	hsa-miR-432-5p	ENSG00000126016|ENST00000304758	154	-22.56	2	20	1266	1289	19	0.6842	0.7895	ENSG00000126016|ENST00000304758	hsa-miR-432-5p	0	44	49	44	49	6178	6mer	x	6mer	0		0	AMOT	protein_coding
ENSG00000162298	hsa-miR-744-5p	ENSG00000162298|ENST00000294256	157	-29.76	2	21	609	630	20	0.75	0.8	ENSG00000162298|ENST00000294256	hsa-miR-744-5p	0	51	56	51	56	6181	6mer	x	6mer	0		0	SYVN1	protein_coding
ENSG00000144485	hsa-miR-148a-3p	ENSG00000144485|ENST00000272937	150	-18.55	2	15	422	443	13	0.7692	0.8462	ENSG00000144485|ENST00000272937	hsa-miR-148a-3p	0	18	25	18	25	6187	8mer-1a	x	8mer-1a	0		0	HES6	protein_coding
ENSG00000144485	hsa-miR-148b-3p	ENSG00000144485|ENST00000272937	154	-17.33	2	15	422	443	13	0.8462	0.8462	ENSG00000144485|ENST00000272937	hsa-miR-148b-3p	0	18	25	18	25	6188	8mer-1a	x	8mer-1a	0		0	HES6	protein_coding
ENSG00000175548	hsa-miR-126-5p	ENSG00000175548|ENST00000308742	152	-9.12	2	17	6150	6170	15	0.7333	0.8	ENSG00000175548|ENST00000308742	hsa-miR-126-5p	0	48	53	48	53	6200	6mer	x	6mer	0		0	ALG10B	protein_coding
ENSG00000101546	hsa-miR-128-3p	ENSG00000101546|ENST00000306735	151	-16.75	2	20	1247	1267	18	0.6667	0.7222	ENSG00000101546|ENST00000306735	hsa-miR-128-3p	0	32	37	32	37	6203	6mer	x	6mer	0		0	RBFA	protein_coding
ENSG00000135248	hsa-miR-23a-3p	ENSG00000135248|ENST00000315184	152	-17.58	2	18	529	550	17	0.7059	0.8235	ENSG00000135248|ENST00000315184	hsa-miR-23a-3p	0	47	52	47	52	6261	6mer	x	6mer	0		0	FAM71F1	protein_coding
ENSG00000135248	hsa-miR-23b-3p	ENSG00000135248|ENST00000315184	152	-17.58	2	18	527	550	17	0.7059	0.8235	ENSG00000135248|ENST00000315184	hsa-miR-23b-3p	0	47	52	47	52	6262	6mer	x	6mer	0		0	FAM71F1	protein_coding
ENSG00000135248	hsa-miR-23c	ENSG00000135248|ENST00000315184	149	-15.21	2	18	528	550	18	0.7778	0.8333	ENSG00000135248|ENST00000315184	hsa-miR-23c	0	47	52	47	52	6263	6mer	x	6mer	0		0	FAM71F1	protein_coding
ENSG00000172840	hsa-miR-126-5p	ENSG00000172840|ENST00000311765	140	-3.43	2	9	5104	5124	7	1	1	ENSG00000172840|ENST00000311765	hsa-miR-126-5p	0	43	49	43	49	6266	7mer-1a	x	7mer-1a	0		0	PDP2	protein_coding
ENSG00000160439	hsa-miR-24-3p	ENSG00000160439|ENST00000291892	156	-22.48	2	20	895	918	21	0.7619	0.7619	ENSG00000160439|ENST00000291892	hsa-miR-24-3p	0	28	34	28	34	6270	7mer-1a	x	7mer-1a	0		0	RDH13	protein_coding
ENSG00000155850	hsa-miR-126-5p	ENSG00000155850|ENST00000286298	140	-3.74	2	9	5567	5587	7	1	1	ENSG00000155850|ENST00000286298	hsa-miR-126-5p	0	39	45	39	45	6287	7mer-1a	x	7mer-1a	0		0	SLC26A2	protein_coding
ENSG00000163217	hsa-miR-126-5p	ENSG00000163217|ENST00000295379	140	-1.65	2	9	1225	1245	7	1	1	ENSG00000163217|ENST00000295379	hsa-miR-126-5p	0	18	24	18	24	6299	7mer-m8	x	7mer-m8	0		0	BMP10	protein_coding
ENSG00000148841	hsa-miR-24-3p	ENSG00000148841|ENST00000278071	152	-20.76	2	18	1253	1275	17	0.7059	0.8235	ENSG00000148841|ENST00000278071	hsa-miR-24-3p	0	48	53	48	53	6306	6mer	x	6mer	0		0	ITPRIP	protein_coding
ENSG00000163026	hsa-miR-361-3p	ENSG00000163026|ENST00000295148	146	-23.74	2	21	412	433	19	0.6316	0.7368	ENSG00000163026|ENST00000295148	hsa-miR-361-3p	0	15	20	15	20	6312	6mer	x	6mer	0		0	WDCP	protein_coding
ENSG00000147883	hsa-miR-432-5p	ENSG00000147883|ENST00000276925	153	-20.4	2	19	1407	1430	18	0.6667	0.8333	ENSG00000147883|ENST00000276925	hsa-miR-432-5p	0	27	32	27	32	6325	6mer	x	6mer	0		0	CDKN2B	protein_coding
ENSG00000159388	hsa-miR-339-5p	ENSG00000159388|ENST00000290551	161	-21.78	2	22	1494	1516	20	0.7	0.75	ENSG00000159388|ENST00000290551	hsa-miR-339-5p	0	24	30	24	30	6329	7mer-m8	x	7mer-m8	0		0	BTG2	protein_coding
ENSG00000164600	hsa-miR-150-5p	ENSG00000164600|ENST00000297142	148	-18.59	2	21	476	497	21	0.7143	0.7143	ENSG00000164600|ENST00000297142	hsa-miR-150-5p	0	19	24	19	24	6360	6mer	x	6mer	0		0	NEUROD6	protein_coding
ENSG00000146674	hsa-miR-199a-5p	ENSG00000146674|ENST00000275521	148	-22.3	2	13	998	1020	11	0.8182	0.9091	ENSG00000146674|ENST00000275521	hsa-miR-199a-5p	0	26	32	26	32	6362	7mer-m8	x	7mer-m8	0		0	IGFBP3	protein_coding
ENSG00000244607	hsa-miR-432-5p	ENSG00000244607|ENST00000310232	156	-24.66	2	21	815	837	19	0.6316	0.7895	ENSG00000244607|ENST00000310232	hsa-miR-432-5p	0	15	20	15	20	6416	6mer	x	6mer	0		0	CCDC13	protein_coding
ENSG00000164366	hsa-miR-24-3p	ENSG00000164366|ENST00000296824	151	-21.63	2	21	4833	4855	20	0.7	0.7	ENSG00000164366|ENST00000296824	hsa-miR-24-3p	0	32	39	32	39	6422	8mer-1a	x	8mer-1a	0		0	CCDC127	protein_coding
ENSG00000164366	hsa-miR-335-5p	ENSG00000164366|ENST00000296824	145	-17.35	2	10	5614	5636	8	1	1	ENSG00000164366|ENST00000296824	hsa-miR-335-5p	0	55	60	55	60	6425	6mer	x	6mer	0		0	CCDC127	protein_coding
ENSG00000173402	hsa-miR-142-3p	ENSG00000173402|ENST00000308775	140	-12.22	2	9	626	648	7	1	1	ENSG00000173402|ENST00000308775	hsa-miR-142-3p	0	22	28	22	28	6441	7mer-1a	x	7mer-1a	0		0	DAG1	protein_coding
ENSG00000162992	hsa-miR-128-3p	ENSG00000162992|ENST00000295108	143	-15.6	2	20	24	44	18	0.6111	0.6667	ENSG00000162992|ENST00000295108	hsa-miR-128-3p	0	39	44	39	44	6456	6mer	x	6mer	0		0	NEUROD1	protein_coding
ENSG00000087338	hsa-miR-664a-5p	ENSG00000087338|ENST00000282570	141	-13.84	2	10	1680	1703	8	0.875	1	ENSG00000087338|ENST00000282570	hsa-miR-664a-5p	0	45	50	45	50	6467	6mer	x	6mer	0		0	GMCL1	protein_coding
ENSG00000258484	hsa-miR-26a-5p	ENSG00000258484|ENST00000310673	144	-8.5	2	18	10	32	17	0.6471	0.7647	ENSG00000258484|ENST00000310673	hsa-miR-26a-5p	0	37	43	37	43	6476	7mer-1a	x	7mer-1a	0		0	SPESP1	protein_coding
ENSG00000145016	hsa-miR-199a-5p	ENSG00000145016|ENST00000273582	146	-14.35	2	15	1436	1458	13	0.7692	0.7692	ENSG00000145016|ENST00000273582	hsa-miR-199a-5p	0	30	37	30	37	6480	8mer-1a	x	8mer-1a	0		0	RUBCN	protein_coding
ENSG00000112763	hsa-miR-24-3p	ENSG00000112763|ENST00000312541	149	-23.57	2	16	713	733	14	0.7857	0.8571	ENSG00000112763|ENST00000312541	hsa-miR-24-3p	0	23	29	23	29	6486	7mer-1a	x	7mer-1a	0		0	BTN2A1	protein_coding
ENSG00000141622	hsa-miR-30a-5p	ENSG00000141622|ENST00000269439	145	-10	2	10	723	744	8	1	1	ENSG00000141622|ENST00000269439	hsa-miR-30a-5p	0	29	34	29	34	6541	6mer	x	6mer	0		0	RNF165	protein_coding
ENSG00000141622	hsa-miR-30b-5p	ENSG00000141622|ENST00000269439	148	-10.45	2	21	723	744	19	0.6316	0.6842	ENSG00000141622|ENST00000269439	hsa-miR-30b-5p	0	29	34	29	34	6542	6mer	x	6mer	0		0	RNF165	protein_coding
ENSG00000141622	hsa-miR-30c-5p	ENSG00000141622|ENST00000269439	145	-9.38	2	10	722	744	8	1	1	ENSG00000141622|ENST00000269439	hsa-miR-30c-5p	0	29	34	29	34	6543	6mer	x	6mer	0		0	RNF165	protein_coding
ENSG00000141622	hsa-miR-30d-5p	ENSG00000141622|ENST00000269439	145	-10.67	2	10	723	744	8	1	1	ENSG00000141622|ENST00000269439	hsa-miR-30d-5p	0	29	34	29	34	6544	6mer	x	6mer	0		0	RNF165	protein_coding
ENSG00000106246	hsa-miR-128-3p	ENSG00000106246|ENST00000292478	146	-15.11	2	12	2007	2028	11	0.9091	0.9091	ENSG00000106246|ENST00000292478	hsa-miR-128-3p	0	17	23	17	23	6547	7mer-m8	x	7mer-m8	0		0	PTCD1	protein_coding
ENSG00000129422	hsa-miR-425-5p	ENSG00000129422|ENST00000297488	148	-16.13	2	22	421	445	22	0.6364	0.6818	ENSG00000129422|ENST00000297488	hsa-miR-425-5p	0	55	60	55	60	6562	6mer	x	6mer	0		0	MTUS1	protein_coding
ENSG00000166073	hsa-miR-30a-3p	ENSG00000166073|ENST00000299092	176	-21.29	2	21	992	1013	19	0.8421	0.8421	ENSG00000166073|ENST00000299092	hsa-miR-30a-3p	0	32	38	32	38	6570	7mer-1a	x	7mer-1a	0		0	GPR176	protein_coding
ENSG00000166073	hsa-miR-30e-3p	ENSG00000166073|ENST00000299092	176	-19.25	2	21	992	1013	19	0.8421	0.8421	ENSG00000166073|ENST00000299092	hsa-miR-30e-3p	0	32	38	32	38	6571	7mer-1a	x	7mer-1a	0		0	GPR176	protein_coding
ENSG00000164070	hsa-miR-126-5p	ENSG00000164070|ENST00000296464	151	-2.41	2	17	7351	7372	16	0.75	0.8125	ENSG00000164070|ENST00000296464	hsa-miR-126-5p	0	43	49	43	49	6578	7mer-1a	x	7mer-1a	0		0	HSPA4L	protein_coding
ENSG00000158955	hsa-miR-28-3p	ENSG00000158955|ENST00000290015	150	-14.68	2	19	1071	1092	17	0.6471	0.7647	ENSG00000158955|ENST00000290015	hsa-miR-28-3p	0	24	29	24	29	6580	6mer	x	6mer	0		0	WNT9B	protein_coding
ENSG00000146700	hsa-miR-29a-3p	ENSG00000146700|ENST00000275560	166	-22.4	2	19	511	532	17	0.8235	0.8235	ENSG00000146700|ENST00000275560	hsa-miR-29a-3p	0	35	42	35	42	6583	8mer-1a	x	8mer-1a	0		0	SSC4D	protein_coding
ENSG00000146700	hsa-miR-29b-3p	ENSG00000146700|ENST00000275560	166	-19.99	2	21	511	532	19	0.7895	0.8421	ENSG00000146700|ENST00000275560	hsa-miR-29b-3p	0	35	42	35	42	6584	8mer-1a	x	8mer-1a	0		0	SSC4D	protein_coding
ENSG00000146700	hsa-miR-29c-3p	ENSG00000146700|ENST00000275560	162	-19.7	2	19	511	532	17	0.7647	0.8235	ENSG00000146700|ENST00000275560	hsa-miR-29c-3p	0	35	42	35	42	6585	8mer-1a	x	8mer-1a	0		0	SSC4D	protein_coding
ENSG00000164627	hsa-miR-150-5p	ENSG00000164627|ENST00000287152	140	-16.15	2	9	4874	4895	7	1	1	ENSG00000164627|ENST00000287152	hsa-miR-150-5p	0	53	59	53	59	6592	7mer-m8	x	7mer-m8	0		0	KIF6	protein_coding
ENSG00000164627	hsa-miR-664a-5p	ENSG00000164627|ENST00000287152	150	-20.79	2	11	2678	2701	9	1	1	ENSG00000164627|ENST00000287152	hsa-miR-664a-5p	0	30	36	30	36	6593	7mer-1a	x	7mer-1a	0		0	KIF6	protein_coding
ENSG00000158296	hsa-miR-27a-3p	ENSG00000158296|ENST00000279027	146	-13.31	2	19	1557	1577	17	0.6471	0.7059	ENSG00000158296|ENST00000279027	hsa-miR-27a-3p	0	43	48	43	48	6618	6mer	x	6mer	0		0	SLC13A3	protein_coding
ENSG00000158296	hsa-miR-27b-3p	ENSG00000158296|ENST00000279027	146	-14.38	2	19	1557	1577	17	0.6471	0.7059	ENSG00000158296|ENST00000279027	hsa-miR-27b-3p	0	43	48	43	48	6619	6mer	x	6mer	0		0	SLC13A3	protein_coding
ENSG00000164588	hsa-miR-30a-5p	ENSG00000164588|ENST00000303230	142	-10.28	2	15	4447	4468	13	0.6923	0.7692	ENSG00000164588|ENST00000303230	hsa-miR-30a-5p	0	50	57	50	57	6629	8mer-1a	x	8mer-1a	0		0	HCN1	protein_coding
ENSG00000164588	hsa-miR-30b-5p	ENSG00000164588|ENST00000303230	140	-4.9	2	9	2853	2874	7	1	1	ENSG00000164588|ENST00000303230	hsa-miR-30b-5p	0	50	57	50	57	6630	8mer-1a	x	8mer-1a	0		0	HCN1	protein_coding
ENSG00000164588	hsa-miR-30c-5p	ENSG00000164588|ENST00000303230	142	-11.74	2	21	4442	4468	23	0.6522	0.6522	ENSG00000164588|ENST00000303230	hsa-miR-30c-5p	0	50	57	50	57	6631	8mer-1a	x	8mer-1a	0		0	HCN1	protein_coding
ENSG00000164588	hsa-miR-30d-5p	ENSG00000164588|ENST00000303230	140	-9.24	2	9	2853	2874	7	1	1	ENSG00000164588|ENST00000303230	hsa-miR-30d-5p	0	50	57	50	57	6632	8mer-1a	x	8mer-1a	0		0	HCN1	protein_coding
ENSG00000161526	hsa-miR-148a-3p	ENSG00000161526|ENST00000293208	147	-14.89	2	16	494	515	14	0.7143	0.7857	ENSG00000161526|ENST00000293208	hsa-miR-148a-3p	0	18	24	18	24	6641	7mer-1a	x	7mer-1a	0		0	SAP30BP	protein_coding
ENSG00000161526	hsa-miR-148b-3p	ENSG00000161526|ENST00000293208	159	-18.75	2	16	494	515	14	0.8571	0.8571	ENSG00000161526|ENST00000293208	hsa-miR-148b-3p	0	18	24	18	24	6642	7mer-1a	x	7mer-1a	0		0	SAP30BP	protein_coding
ENSG00000161526	hsa-miR-339-5p	ENSG00000161526|ENST00000293208	149	-24.34	2	20	417	438	18	0.7222	0.7222	ENSG00000161526|ENST00000293208	hsa-miR-339-5p	0	25	31	25	31	6643	7mer-1a	x	7mer-1a	0		0	SAP30BP	protein_coding
ENSG00000168769	hsa-miR-199a-5p	ENSG00000168769|ENST00000305737	177	-30	2	22	1653	1675	20	0.8	0.85	ENSG00000168769|ENST00000305737	hsa-miR-199a-5p	0	44	49	44	49	6647	6mer	x	6mer	0		0	TET2	protein_coding
ENSG00000163320	hsa-miR-181a-5p	ENSG00000163320|ENST00000309534	140	-11.6	2	9	2949	2971	7	1	1	ENSG00000163320|ENST00000309534	hsa-miR-181a-5p	0	37	43	37	43	6656	7mer-m8	x	7mer-m8	0		0	CGGBP1	protein_coding
ENSG00000163320	hsa-miR-181b-5p	ENSG00000163320|ENST00000309534	151	-13.25	2	13	2948	2971	12	0.9167	0.9167	ENSG00000163320|ENST00000309534	hsa-miR-181b-5p	0	37	43	37	43	6657	7mer-m8	x	7mer-m8	0		0	CGGBP1	protein_coding
ENSG00000154144	hsa-miR-625-3p	ENSG00000154144|ENST00000284290	140	-7.71	2	9	2333	2354	7	1	1	ENSG00000154144|ENST00000284290	hsa-miR-625-3p	0	18	23	18	23	6660	6mer	x	6mer	0		0	TBRG1	protein_coding
ENSG00000164007	hsa-miR-361-3p	ENSG00000164007|ENST00000296387	170	-26.08	2	22	1501	1521	20	0.8	0.85	ENSG00000164007|ENST00000296387	hsa-miR-361-3p	0	34	40	34	40	6666	7mer-m8	x	7mer-m8	0		0	CLDN19	protein_coding
ENSG00000104267	hsa-miR-15a-5p	ENSG00000104267|ENST00000285379	143	-12.2	2	19	311	330	17	0.6471	0.7647	ENSG00000104267|ENST00000285379	hsa-miR-15a-5p	0	52	57	52	57	6667	6mer	x	6mer	0		0	CA2	protein_coding
ENSG00000104267	hsa-miR-15b-5p	ENSG00000104267|ENST00000285379	145	-14.42	2	21	311	330	19	0.6316	0.7368	ENSG00000104267|ENST00000285379	hsa-miR-15b-5p	0	52	57	52	57	6668	6mer	x	6mer	0		0	CA2	protein_coding
ENSG00000170903	hsa-miR-126-5p	ENSG00000170903|ENST00000301919	168	-18.45	2	20	1020	1038	18	0.8333	0.8889	ENSG00000170903|ENST00000301919	hsa-miR-126-5p	0	18	23	18	23	6669	6mer	x	6mer	0		0	MSANTD4	protein_coding
ENSG00000170903	hsa-miR-25-3p	ENSG00000170903|ENST00000301919	150	-20.05	2	21	386	406	19	0.6316	0.7895	ENSG00000170903|ENST00000301919	hsa-miR-25-3p	0	15	21	15	21	6672	7mer-1a	x	7mer-1a	0		0	MSANTD4	protein_coding
ENSG00000170903	hsa-miR-92a-3p	ENSG00000170903|ENST00000301919	154	-19.85	2	21	386	406	19	0.6842	0.7895	ENSG00000170903|ENST00000301919	hsa-miR-92a-3p	0	15	21	15	21	6673	7mer-1a	x	7mer-1a	0		0	MSANTD4	protein_coding
ENSG00000130559	hsa-miR-15a-5p	ENSG00000130559|ENST00000312405	154	-11.5	2	20	602	626	21	0.6667	0.7619	ENSG00000130559|ENST00000312405	hsa-miR-15a-5p	0	21	26	21	26	6675	6mer	x	6mer	0		0	CAMSAP1	protein_coding
ENSG00000130559	hsa-miR-15b-5p	ENSG00000130559|ENST00000312405	146	-9.47	2	20	602	626	21	0.619	0.7143	ENSG00000130559|ENST00000312405	hsa-miR-15b-5p	0	21	26	21	26	6676	6mer	x	6mer	0		0	CAMSAP1	protein_coding
ENSG00000117877	hsa-miR-361-3p	ENSG00000117877|ENST00000309424	162	-22.61	2	21	132	153	19	0.7368	0.8421	ENSG00000117877|ENST00000309424	hsa-miR-361-3p	0	19	24	19	24	6686	6mer	x	6mer	0		0	POLR1G	protein_coding
ENSG00000146233	hsa-miR-126-5p	ENSG00000146233|ENST00000275016	152	-3.92	2	18	403	424	17	0.7059	0.8235	ENSG00000146233|ENST00000275016	hsa-miR-126-5p	0	50	55	50	55	6692	6mer	x	6mer	0		0	CYP39A1	protein_coding
ENSG00000146233	hsa-miR-128-3p	ENSG00000146233|ENST00000275016	150	-15.64	2	11	338	358	9	1	1	ENSG00000146233|ENST00000275016	hsa-miR-128-3p	0	28	34	28	34	6693	7mer-m8	x	7mer-m8	0		0	CYP39A1	protein_coding
ENSG00000150347	hsa-miR-192-5p	ENSG00000150347|ENST00000279873	140	-12.21	2	9	2295	2315	7	1	1	ENSG00000150347|ENST00000279873	hsa-miR-192-5p	0	31	36	31	36	6700	6mer	x	6mer	0		0	ARID5B	protein_coding
ENSG00000150347	hsa-miR-215-5p	ENSG00000150347|ENST00000279873	140	-12.49	2	9	2295	2315	7	1	1	ENSG00000150347|ENST00000279873	hsa-miR-215-5p	0	31	36	31	36	6701	6mer	x	6mer	0		0	ARID5B	protein_coding
ENSG00000168143	hsa-miR-199a-5p	ENSG00000168143|ENST00000306858	146	-13.3	2	19	657	679	17	0.6471	0.7059	ENSG00000168143|ENST00000306858	hsa-miR-199a-5p	0	40	46	40	46	6705	7mer-m8	x	7mer-m8	0		0	FAM83B	protein_coding
ENSG00000204624	hsa-miR-361-3p	ENSG00000204624|ENST00000294484	155	-18.82	2	21	684	707	20	0.7	0.75	ENSG00000204624|ENST00000294484	hsa-miR-361-3p	0	32	37	32	37	6706	6mer	x	6mer	0		0	DISP3	protein_coding
ENSG00000175073	hsa-miR-155-5p	ENSG00000175073|ENST00000310421	154	-13.77	2	19	1922	1943	17	0.8235	0.8235	ENSG00000175073|ENST00000310421	hsa-miR-155-5p	0	31	36	31	36	6708	6mer	x	6mer	0		0	VCPIP1	protein_coding
ENSG00000175073	hsa-miR-30a-3p	ENSG00000175073|ENST00000310421	151	-15.47	2	20	4046	4066	19	0.7368	0.7895	ENSG00000175073|ENST00000310421	hsa-miR-30a-3p	0	43	48	43	48	6709	6mer	x	6mer	0		0	VCPIP1	protein_coding
ENSG00000175073	hsa-miR-30e-3p	ENSG00000175073|ENST00000310421	152	-13.47	2	20	4041	4066	22	0.7273	0.7727	ENSG00000175073|ENST00000310421	hsa-miR-30e-3p	0	43	48	43	48	6710	6mer	x	6mer	0		0	VCPIP1	protein_coding
ENSG00000225697	hsa-miR-15a-5p	ENSG00000225697|ENST00000307364	140	-11.24	2	9	1166	1187	7	1	1	ENSG00000225697|ENST00000307364	hsa-miR-15a-5p	0	40	45	40	45	6731	6mer	x	6mer	0		0	SLC26A6	protein_coding
ENSG00000225697	hsa-miR-15b-5p	ENSG00000225697|ENST00000307364	140	-10.8	2	9	1166	1187	7	1	1	ENSG00000225697|ENST00000307364	hsa-miR-15b-5p	0	40	45	40	45	6732	6mer	x	6mer	0		0	SLC26A6	protein_coding
ENSG00000225697	hsa-miR-29a-3p	ENSG00000225697|ENST00000307364	149	-20.27	2	14	488	509	12	0.75	0.9167	ENSG00000225697|ENST00000307364	hsa-miR-29a-3p	0	26	31	26	31	6733	6mer	x	6mer	0		0	SLC26A6	protein_coding
ENSG00000225697	hsa-miR-29b-3p	ENSG00000225697|ENST00000307364	147	-18.51	2	21	486	509	20	0.55	0.8	ENSG00000225697|ENST00000307364	hsa-miR-29b-3p	0	26	31	26	31	6734	6mer	x	6mer	0		0	SLC26A6	protein_coding
ENSG00000225697	hsa-miR-29c-3p	ENSG00000225697|ENST00000307364	145	-17.88	2	14	488	509	12	0.6667	0.9167	ENSG00000225697|ENST00000307364	hsa-miR-29c-3p	0	26	31	26	31	6735	6mer	x	6mer	0		0	SLC26A6	protein_coding
ENSG00000168874	hsa-miR-361-3p	ENSG00000168874|ENST00000306279	163	-23.41	2	22	454	475	20	0.75	0.8	ENSG00000168874|ENST00000306279	hsa-miR-361-3p	0	55	60	55	60	6762	6mer	x	6mer	0		0	ATOH8	protein_coding
ENSG00000129451	hsa-miR-7847-3p	ENSG00000129451|ENST00000309958	156	-25.71	2	18	122	143	17	0.7647	0.8235	ENSG00000129451|ENST00000309958	hsa-miR-7847-3p	0	53	59	53	59	6765	7mer-1a	x	7mer-1a	0		0	KLK10	protein_coding
ENSG00000144452	hsa-miR-30a-3p	ENSG00000144452|ENST00000272895	144	-9.71	2	13	181	202	11	0.8182	0.8182	ENSG00000144452|ENST00000272895	hsa-miR-30a-3p	0	17	23	17	23	6785	7mer-m8	x	7mer-m8	0		0	ABCA12	protein_coding
ENSG00000144452	hsa-miR-30e-3p	ENSG00000144452|ENST00000272895	146	-11.97	2	20	177	202	22	0.5455	0.7727	ENSG00000144452|ENST00000272895	hsa-miR-30e-3p	0	17	23	17	23	6786	7mer-m8	x	7mer-m8	0		0	ABCA12	protein_coding
ENSG00000151789	hsa-miR-130a-3p	ENSG00000151789|ENST00000281523	151	-13.5	2	20	4352	4370	18	0.6667	0.8333	ENSG00000151789|ENST00000281523	hsa-miR-130a-3p	0	52	58	52	58	6792	7mer-m8	x	7mer-m8	0		0	ZNF385D	protein_coding
ENSG00000151789	hsa-miR-142-5p	ENSG00000151789|ENST00000281523	153	-16.89	2	19	2966	2987	18	0.7222	0.7778	ENSG00000151789|ENST00000281523	hsa-miR-142-5p	0	38	45	38	45	6793	8mer-1a	x	8mer-1a	0		0	ZNF385D	protein_coding
ENSG00000170234	hsa-miR-130a-3p	ENSG00000170234|ENST00000307063	144	-9.01	2	13	91	112	11	0.7273	0.9091	ENSG00000170234|ENST00000307063	hsa-miR-130a-3p	0	48	54	48	54	6804	7mer-m8	x	7mer-m8	0		0	PWWP2A	protein_coding
ENSG00000163735	hsa-miR-25-3p	ENSG00000163735|ENST00000296027	140	-7.89	2	9	1698	1719	7	1	1	ENSG00000163735|ENST00000296027	hsa-miR-25-3p	0	17	23	17	23	6805	7mer-m8	x	7mer-m8	0		0	CXCL5	protein_coding
ENSG00000163735	hsa-miR-92a-3p	ENSG00000163735|ENST00000296027	140	-8.25	2	9	1698	1719	7	1	1	ENSG00000163735|ENST00000296027	hsa-miR-92a-3p	0	17	23	17	23	6806	7mer-m8	x	7mer-m8	0		0	CXCL5	protein_coding
ENSG00000167695	hsa-miR-30a-5p	ENSG00000167695|ENST00000308278	143	-9.29	2	16	835	856	14	0.7143	0.7143	ENSG00000167695|ENST00000308278	hsa-miR-30a-5p	0	32	38	32	38	6812	7mer-1a	x	7mer-1a	0		0	TLCD3A	protein_coding
ENSG00000167695	hsa-miR-30b-5p	ENSG00000167695|ENST00000308278	150	-15.23	2	20	833	856	20	0.65	0.75	ENSG00000167695|ENST00000308278	hsa-miR-30b-5p	0	32	38	32	38	6813	7mer-1a	x	7mer-1a	0		0	TLCD3A	protein_coding
ENSG00000167695	hsa-miR-30c-5p	ENSG00000167695|ENST00000308278	151	-12.72	2	22	831	856	23	0.6522	0.7391	ENSG00000167695|ENST00000308278	hsa-miR-30c-5p	0	32	38	32	38	6814	7mer-1a	x	7mer-1a	0		0	TLCD3A	protein_coding
ENSG00000167695	hsa-miR-30d-5p	ENSG00000167695|ENST00000308278	146	-9.66	2	16	834	856	15	0.7333	0.8	ENSG00000167695|ENST00000308278	hsa-miR-30d-5p	0	32	38	32	38	6815	7mer-1a	x	7mer-1a	0		0	TLCD3A	protein_coding
ENSG00000124831	hsa-miR-361-3p	ENSG00000124831|ENST00000308482	140	-19.63	2	9	1380	1402	7	1	1	ENSG00000124831|ENST00000308482	hsa-miR-361-3p	0	38	43	38	43	6821	6mer	x	6mer	0		0	LRRFIP1	protein_coding
ENSG00000152256	hsa-miR-339-5p	ENSG00000152256|ENST00000282077	150	-20.63	2	20	8283	8306	19	0.6316	0.7895	ENSG00000152256|ENST00000282077	hsa-miR-339-5p	0	45	50	45	50	6849	6mer	x	6mer	0		0	PDK1	protein_coding
ENSG00000167105	hsa-miR-150-5p	ENSG00000167105|ENST00000300433	155	-21.7	2	21	1701	1723	20	0.7	0.75	ENSG00000167105|ENST00000300433	hsa-miR-150-5p	0	29	35	29	35	6852	7mer-1a	x	7mer-1a	0		0	TMEM92	protein_coding
ENSG00000112276	hsa-miR-126-5p	ENSG00000112276|ENST00000314641	156	-12.61	2	18	3194	3216	18	0.7222	0.8333	ENSG00000112276|ENST00000314641	hsa-miR-126-5p	0	35	40	35	40	6854	6mer	x	6mer	0		0	BVES	protein_coding
ENSG00000162817	hsa-miR-24-3p	ENSG00000162817|ENST00000294889	148	-17.15	2	14	2157	2179	13	0.8462	0.8462	ENSG00000162817|ENST00000294889	hsa-miR-24-3p	0	34	39	34	39	6870	6mer	x	6mer	0		0	C1orf115	protein_coding
ENSG00000173542	hsa-miR-150-5p	ENSG00000173542|ENST00000309395	140	-15.34	2	9	3280	3301	7	1	1	ENSG00000173542|ENST00000309395	hsa-miR-150-5p	0	36	42	36	42	6872	7mer-m8	x	7mer-m8	0		0	MOB1B	protein_coding
ENSG00000145087	hsa-miR-432-5p	ENSG00000145087|ENST00000273666	140	-14.51	2	9	4573	4595	7	1	1	ENSG00000145087|ENST00000273666	hsa-miR-432-5p	0	34	39	34	39	6885	6mer	x	6mer	0		0	STXBP5L	protein_coding
ENSG00000141576	hsa-miR-320c	ENSG00000141576|ENST00000269391	140	-9.06	2	9	336	355	7	1	1	ENSG00000141576|ENST00000269391	hsa-miR-320c	0	48	54	48	54	6886	7mer-m8	x	7mer-m8	0		0	RNF157	protein_coding
ENSG00000141576	hsa-miR-320d	ENSG00000141576|ENST00000269391	140	-8.4	2	9	337	355	7	1	1	ENSG00000141576|ENST00000269391	hsa-miR-320d	0	48	54	48	54	6887	7mer-m8	x	7mer-m8	0		0	RNF157	protein_coding
ENSG00000167196	hsa-miR-224-5p	ENSG00000167196|ENST00000308275	145	-13.9	2	14	3140	3164	12	0.75	0.8333	ENSG00000167196|ENST00000308275	hsa-miR-224-5p	0	50	55	50	55	6895	6mer	x	6mer	0		0	FBXO22	protein_coding
ENSG00000175449	hsa-miR-221-3p	ENSG00000175449|ENST00000311364	147	-15.33	2	22	359	380	20	0.55	0.8	ENSG00000175449|ENST00000311364	hsa-miR-221-3p	0	42	47	42	47	6897	6mer	x	6mer	0		0	RFESD	protein_coding
ENSG00000117090	hsa-miR-30a-3p	ENSG00000117090|ENST00000302035	170	-18.43	2	19	330	351	17	0.8235	0.8824	ENSG00000117090|ENST00000302035	hsa-miR-30a-3p	0	49	54	49	54	6902	6mer	x	6mer	0		0	SLAMF1	protein_coding
ENSG00000117090	hsa-miR-30e-3p	ENSG00000117090|ENST00000302035	174	-18.11	2	19	330	351	17	0.8824	0.8824	ENSG00000117090|ENST00000302035	hsa-miR-30e-3p	0	49	54	49	54	6903	6mer	x	6mer	0		0	SLAMF1	protein_coding
ENSG00000160683	hsa-miR-150-5p	ENSG00000160683|ENST00000292174	141	-15.98	2	15	1294	1317	15	0.7333	0.7333	ENSG00000160683|ENST00000292174	hsa-miR-150-5p	0	37	42	37	42	6905	6mer	x	6mer	0		0	CXCR5	protein_coding
ENSG00000110436	hsa-miR-199a-3p	ENSG00000110436|ENST00000278379	143	-10.29	2	21	5964	5989	23	0.6087	0.6522	ENSG00000110436|ENST00000278379	hsa-miR-199a-3p	0	15	21	15	21	6936	7mer-1a	x	7mer-1a	0		0	SLC1A2	protein_coding
ENSG00000110436	hsa-miR-199b-3p	ENSG00000110436|ENST00000278379	143	-10.29	2	21	5964	5989	23	0.6087	0.6522	ENSG00000110436|ENST00000278379	hsa-miR-199b-3p	0	15	21	15	21	6937	7mer-1a	x	7mer-1a	0		0	SLC1A2	protein_coding
ENSG00000114353	hsa-miR-361-3p	ENSG00000114353|ENST00000313601	140	-19.53	2	9	863	885	7	1	1	ENSG00000114353|ENST00000313601	hsa-miR-361-3p	0	46	53	46	53	6962	8mer-1a	x	8mer-1a	0		0	GNAI2	protein_coding
ENSG00000143195	hsa-miR-15a-5p	ENSG00000143195|ENST00000271417	153	-16.36	2	20	5111	5134	20	0.7	0.8	ENSG00000143195|ENST00000271417	hsa-miR-15a-5p	0	47	53	47	53	6965	7mer-m8	x	7mer-m8	0		0	ILDR2	protein_coding
ENSG00000143195	hsa-miR-15b-5p	ENSG00000143195|ENST00000271417	160	-22.29	2	19	3421	3441	17	0.7059	0.9412	ENSG00000143195|ENST00000271417	hsa-miR-15b-5p	0	47	53	47	53	6967	7mer-m8	x	7mer-m8	0		0	ILDR2	protein_coding
ENSG00000168497	hsa-miR-30a-5p	ENSG00000168497|ENST00000304141	156	-18.39	2	20	517	536	18	0.7222	0.8333	ENSG00000168497|ENST00000304141	hsa-miR-30a-5p	0	52	59	52	59	6981	8mer-1a	x	8mer-1a	0		0	CAVIN2	protein_coding
ENSG00000168497	hsa-miR-30b-5p	ENSG00000168497|ENST00000304141	154	-12	2	15	515	536	13	0.8462	0.8462	ENSG00000168497|ENST00000304141	hsa-miR-30b-5p	0	52	59	52	59	6982	8mer-1a	x	8mer-1a	0		0	CAVIN2	protein_coding
ENSG00000168497	hsa-miR-30c-5p	ENSG00000168497|ENST00000304141	154	-12.39	2	15	514	536	13	0.8462	0.8462	ENSG00000168497|ENST00000304141	hsa-miR-30c-5p	0	52	59	52	59	6983	8mer-1a	x	8mer-1a	0		0	CAVIN2	protein_coding
ENSG00000168497	hsa-miR-30d-5p	ENSG00000168497|ENST00000304141	156	-20.31	2	20	517	536	18	0.7222	0.8333	ENSG00000168497|ENST00000304141	hsa-miR-30d-5p	0	52	59	52	59	6984	8mer-1a	x	8mer-1a	0		0	CAVIN2	protein_coding
ENSG00000105327	hsa-miR-24-3p	ENSG00000105327|ENST00000300880	151	-21.41	2	12	166	187	10	0.9	1	ENSG00000105327|ENST00000300880	hsa-miR-24-3p	0	18	24	18	24	7009	7mer-m8	x	7mer-m8	0		0	BBC3	protein_coding
ENSG00000151702	hsa-miR-130a-3p	ENSG00000151702|ENST00000281428	154	-13.64	2	20	1491	1513	19	0.6842	0.7895	ENSG00000151702|ENST00000281428	hsa-miR-130a-3p	0	39	44	39	44	7014	6mer	x	6mer	0		0	FLI1	protein_coding
ENSG00000164597	hsa-miR-335-5p	ENSG00000164597|ENST00000297135	165	-15.01	2	20	795	816	18	0.8333	0.8333	ENSG00000164597|ENST00000297135	hsa-miR-335-5p	0	43	49	43	49	7022	7mer-m8	x	7mer-m8	0		0	COG5	protein_coding
ENSG00000166166	hsa-miR-7847-3p	ENSG00000166166|ENST00000299202	141	-14.03	2	11	838	859	10	0.9	0.9	ENSG00000166166|ENST00000299202	hsa-miR-7847-3p	0	36	42	36	42	7029	7mer-1a	x	7mer-1a	0		0	TRMT61A	protein_coding
ENSG00000153048	hsa-miR-432-5p	ENSG00000153048|ENST00000311052	158	-25.68	2	17	423	444	15	0.8	0.9333	ENSG00000153048|ENST00000311052	hsa-miR-432-5p	0	22	28	22	28	7030	7mer-m8	x	7mer-m8	0		0	CARHSP1	protein_coding
ENSG00000168763	hsa-miR-7847-3p	ENSG00000168763|ENST00000305510	146	-19.07	2	17	1368	1390	17	0.7647	0.7647	ENSG00000168763|ENST00000305510	hsa-miR-7847-3p	0	29	34	29	34	7032	6mer	x	6mer	0		0	CNNM3	protein_coding
ENSG00000170584	hsa-miR-223-3p	ENSG00000170584|ENST00000302764	142	-12.93	2	11	3906	3927	9	0.7778	1	ENSG00000170584|ENST00000302764	hsa-miR-223-3p	0	15	21	15	21	7038	7mer-1a	x	7mer-1a	0		0	NUDCD2	protein_coding
ENSG00000006625	hsa-miR-30a-3p	ENSG00000006625|ENST00000275428	142	-17.13	2	21	241	257	19	0.6316	0.7368	ENSG00000006625|ENST00000275428	hsa-miR-30a-3p	0	23	29	23	29	7043	7mer-m8	x	7mer-m8	0		0	GGCT	protein_coding
ENSG00000006625	hsa-miR-30e-3p	ENSG00000006625|ENST00000275428	146	-20.42	2	21	241	257	19	0.6842	0.7368	ENSG00000006625|ENST00000275428	hsa-miR-30e-3p	0	23	29	23	29	7044	7mer-m8	x	7mer-m8	0		0	GGCT	protein_coding
ENSG00000172985	hsa-miR-126-5p	ENSG00000172985|ENST00000309415	158	-9.61	2	15	740	760	13	0.8462	0.9231	ENSG00000172985|ENST00000309415	hsa-miR-126-5p	0	34	39	34	39	7045	6mer	x	6mer	0		0	SH3RF3	protein_coding
ENSG00000112624	hsa-miR-142-5p	ENSG00000112624|ENST00000314073	140	-6.25	2	9	2126	2146	7	1	1	ENSG00000112624|ENST00000314073	hsa-miR-142-5p	0	24	30	24	30	7049	7mer-1a	x	7mer-1a	0		0	BICRAL	protein_coding
ENSG00000152348	hsa-miR-150-5p	ENSG00000152348|ENST00000282185	143	-17.14	2	17	234	257	17	0.7059	0.7059	ENSG00000152348|ENST00000282185	hsa-miR-150-5p	0	25	30	25	30	7059	6mer	x	6mer	0		0	ATG10	protein_coding
ENSG00000082258	hsa-miR-15a-5p	ENSG00000082258|ENST00000295238	159	-15.06	2	21	209	231	20	0.7	0.8	ENSG00000082258|ENST00000295238	hsa-miR-15a-5p	0	48	54	48	54	7061	7mer-m8	x	7mer-m8	0		0	CCNT2	protein_coding
ENSG00000082258	hsa-miR-15b-5p	ENSG00000082258|ENST00000295238	150	-14.15	2	20	209	231	19	0.6842	0.7368	ENSG00000082258|ENST00000295238	hsa-miR-15b-5p	0	48	54	48	54	7062	7mer-m8	x	7mer-m8	0		0	CCNT2	protein_coding
ENSG00000043093	hsa-miR-30a-3p	ENSG00000043093|ENST00000292782	153	-11.33	2	14	4597	4618	12	0.8333	0.9167	ENSG00000043093|ENST00000292782	hsa-miR-30a-3p	0	32	38	32	38	7068	7mer-m8	x	7mer-m8	0		0	DCUN1D1	protein_coding
ENSG00000043093	hsa-miR-30e-3p	ENSG00000043093|ENST00000292782	156	-12.12	2	19	4598	4618	17	0.7059	0.8824	ENSG00000043093|ENST00000292782	hsa-miR-30e-3p	0	32	38	32	38	7069	7mer-m8	x	7mer-m8	0		0	DCUN1D1	protein_coding
ENSG00000108424	hsa-miR-320c	ENSG00000108424|ENST00000290158	148	-16.54	2	16	2905	2922	14	0.7857	0.8571	ENSG00000108424|ENST00000290158	hsa-miR-320c	0	33	39	33	39	7071	7mer-1a	x	7mer-1a	0		0	KPNB1	protein_coding
ENSG00000108424	hsa-miR-320d	ENSG00000108424|ENST00000290158	148	-15.88	2	16	2906	2922	14	0.7857	0.8571	ENSG00000108424|ENST00000290158	hsa-miR-320d	0	33	39	33	39	7072	7mer-1a	x	7mer-1a	0		0	KPNB1	protein_coding
ENSG00000003402	hsa-miR-25-3p	ENSG00000003402|ENST00000309955	153	-24.46	2	21	9276	9301	23	0.6522	0.8261	ENSG00000003402|ENST00000309955	hsa-miR-25-3p	0	36	42	36	42	7081	7mer-m8	x	7mer-m8	0		0	CFLAR	protein_coding
ENSG00000003402	hsa-miR-92a-3p	ENSG00000003402|ENST00000309955	157	-26.75	2	21	9276	9301	23	0.6957	0.8261	ENSG00000003402|ENST00000309955	hsa-miR-92a-3p	0	36	42	36	42	7082	7mer-m8	x	7mer-m8	0		0	CFLAR	protein_coding
ENSG00000120549	hsa-miR-451a	ENSG00000120549|ENST00000307544	166	-16.66	2	21	70	90	19	0.7895	0.8421	ENSG00000120549|ENST00000307544	hsa-miR-451a	0	45	50	45	50	7092	6mer	x	6mer	0		0	KIAA1217	protein_coding
ENSG00000166676	hsa-miR-142-5p	ENSG00000166676|ENST00000299866	146	-7.3	2	11	805	825	9	0.8889	1	ENSG00000166676|ENST00000299866	hsa-miR-142-5p	0	26	32	26	32	7097	7mer-m8	x	7mer-m8	0		0	TVP23A	protein_coding
ENSG00000148143	hsa-miR-320c	ENSG00000148143|ENST00000277225	150	-18.23	2	19	1456	1475	17	0.6471	0.7647	ENSG00000148143|ENST00000277225	hsa-miR-320c	0	27	33	27	33	7124	7mer-m8	x	7mer-m8	0		0	ZNF462	protein_coding
ENSG00000148143	hsa-miR-320d	ENSG00000148143|ENST00000277225	149	-15.86	2	18	1457	1475	16	0.6875	0.75	ENSG00000148143|ENST00000277225	hsa-miR-320d	0	27	33	27	33	7125	7mer-m8	x	7mer-m8	0		0	ZNF462	protein_coding
ENSG00000150712	hsa-miR-7847-3p	ENSG00000150712|ENST00000280285	140	-14.01	2	9	2067	2087	7	1	1	ENSG00000150712|ENST00000280285	hsa-miR-7847-3p	0	19	25	19	25	7133	7mer-m8	x	7mer-m8	0		0	MTMR12	protein_coding
ENSG00000119950	hsa-miR-126-5p	ENSG00000119950|ENST00000332674	145	-8.34	2	14	455	475	12	0.75	0.8333	ENSG00000119950|ENST00000332674	hsa-miR-126-5p	0	31	36	31	36	7142	6mer	x	6mer	0		0	MXI1	protein_coding
ENSG00000183166	hsa-miR-150-5p	ENSG00000183166|ENST00000329008	140	-15.8	2	9	4750	4771	7	1	1	ENSG00000183166|ENST00000329008	hsa-miR-150-5p	0	15	21	15	21	7143	7mer-m8	x	7mer-m8	0		0	CALN1	protein_coding
ENSG00000167634	hsa-miR-150-5p	ENSG00000167634|ENST00000340844	143	-14.47	2	16	128	149	14	0.7143	0.7143	ENSG00000167634|ENST00000340844	hsa-miR-150-5p	0	49	54	49	54	7146	6mer	x	6mer	0		0	NLRP7	protein_coding
ENSG00000139220	hsa-miR-128-3p	ENSG00000139220|ENST00000333447	143	-15.54	2	20	686	703	18	0.6667	0.7222	ENSG00000139220|ENST00000333447	hsa-miR-128-3p	0	16	22	16	22	7152	7mer-m8	x	7mer-m8	0		0	PPFIA2	protein_coding
ENSG00000107164	hsa-miR-432-5p	ENSG00000107164|ENST00000319725	151	-20.8	2	22	712	730	20	0.7	0.8	ENSG00000107164|ENST00000319725	hsa-miR-432-5p	0	21	27	21	27	7156	7mer-1a	x	7mer-1a	0		0	FUBP3	protein_coding
ENSG00000116852	hsa-miR-7847-3p	ENSG00000116852|ENST00000332129	179	-34.94	2	20	492	512	18	0.8333	0.9444	ENSG00000116852|ENST00000332129	hsa-miR-7847-3p	0	32	38	32	38	7177	7mer-1a	x	7mer-1a	0		0	KIF21B	protein_coding
ENSG00000165322	hsa-miR-181a-5p	ENSG00000165322|ENST00000344936	141	-11.8	2	22	215	235	20	0.6	0.75	ENSG00000165322|ENST00000344936	hsa-miR-181a-5p	0	22	29	22	29	7202	8mer-1a	x	8mer-1a	0		0	ARHGAP12	protein_coding
ENSG00000165322	hsa-miR-181b-5p	ENSG00000165322|ENST00000344936	140	-11.52	2	9	213	235	7	1	1	ENSG00000165322|ENST00000344936	hsa-miR-181b-5p	0	22	29	22	29	7203	8mer-1a	x	8mer-1a	0		0	ARHGAP12	protein_coding
ENSG00000001167	hsa-miR-30a-3p	ENSG00000001167|ENST00000341376	162	-19.7	2	19	1357	1378	17	0.7647	0.8235	ENSG00000001167|ENST00000341376	hsa-miR-30a-3p	0	46	52	46	52	7207	7mer-1a	x	7mer-1a	0		0	NFYA	protein_coding
ENSG00000001167	hsa-miR-30e-3p	ENSG00000001167|ENST00000341376	166	-18.54	2	19	1357	1378	17	0.8235	0.8235	ENSG00000001167|ENST00000341376	hsa-miR-30e-3p	0	46	52	46	52	7208	7mer-1a	x	7mer-1a	0		0	NFYA	protein_coding
ENSG00000160712	hsa-miR-128-3p	ENSG00000160712|ENST00000344086	150	-20.35	2	19	447	467	17	0.6471	0.7647	ENSG00000160712|ENST00000344086	hsa-miR-128-3p	0	50	56	50	56	7222	7mer-m8	x	7mer-m8	0		0	IL6R	protein_coding
ENSG00000165632	hsa-miR-361-3p	ENSG00000165632|ENST00000344293	164	-29.14	2	22	217	240	21	0.6667	0.8571	ENSG00000165632|ENST00000344293	hsa-miR-361-3p	0	52	57	52	57	7224	6mer	x	6mer	0		0	TAF3	protein_coding
ENSG00000175931	hsa-miR-23a-3p	ENSG00000175931|ENST00000319380	159	-14.58	2	20	992	1012	18	0.6111	0.8889	ENSG00000175931|ENST00000319380	hsa-miR-23a-3p	0	38	43	38	43	7282	6mer	x	6mer	0		0	UBE2O	protein_coding
ENSG00000175931	hsa-miR-23b-3p	ENSG00000175931|ENST00000319380	158	-14.11	2	20	989	1012	19	0.6842	0.8421	ENSG00000175931|ENST00000319380	hsa-miR-23b-3p	0	38	43	38	43	7283	6mer	x	6mer	0		0	UBE2O	protein_coding
ENSG00000175931	hsa-miR-23c	ENSG00000175931|ENST00000319380	154	-11.12	2	20	990	1012	19	0.6842	0.7895	ENSG00000175931|ENST00000319380	hsa-miR-23c	0	38	43	38	43	7284	6mer	x	6mer	0		0	UBE2O	protein_coding
ENSG00000104177	hsa-miR-199a-5p	ENSG00000104177|ENST00000324324	145	-12.71	2	10	940	962	8	1	1	ENSG00000104177|ENST00000324324	hsa-miR-199a-5p	0	31	36	31	36	7294	6mer	x	6mer	0		0	MYEF2	protein_coding
ENSG00000104177	hsa-miR-221-3p	ENSG00000104177|ENST00000324324	160	-17.62	2	17	604	626	15	0.8	0.8667	ENSG00000104177|ENST00000324324	hsa-miR-221-3p	0	48	54	48	54	7295	7mer-m8	x	7mer-m8	0		0	MYEF2	protein_coding
ENSG00000117360	hsa-miR-199a-3p	ENSG00000117360|ENST00000324862	145	-11.31	2	10	1	9	8	1	1	ENSG00000117360|ENST00000324862	hsa-miR-199a-3p	0	43	49	43	49	7303	7mer-1a	x	7mer-1a	0		0	PRPF3	protein_coding
ENSG00000117360	hsa-miR-199b-3p	ENSG00000117360|ENST00000324862	145	-11.31	2	10	1	9	8	1	1	ENSG00000117360|ENST00000324862	hsa-miR-199b-3p	0	43	49	43	49	7304	7mer-1a	x	7mer-1a	0		0	PRPF3	protein_coding
ENSG00000125388	hsa-miR-150-5p	ENSG00000125388|ENST00000345167	151	-13.86	2	16	93	114	14	0.7857	0.7857	ENSG00000125388|ENST00000345167	hsa-miR-150-5p	0	39	44	39	44	7316	6mer	x	6mer	0		0	GRK4	protein_coding
ENSG00000182263	hsa-miR-148a-3p	ENSG00000182263|ENST00000333129	148	-12.72	2	21	5153	5172	19	0.7368	0.7368	ENSG00000182263|ENST00000333129	hsa-miR-148a-3p	0	50	55	50	55	7332	6mer	x	6mer	0		0	FIGN	protein_coding
ENSG00000182263	hsa-miR-148b-3p	ENSG00000182263|ENST00000333129	148	-13.61	2	21	5153	5172	19	0.7368	0.7368	ENSG00000182263|ENST00000333129	hsa-miR-148b-3p	0	50	55	50	55	7333	6mer	x	6mer	0		0	FIGN	protein_coding
ENSG00000108469	hsa-miR-15a-5p	ENSG00000108469|ENST00000317905	140	-13.92	2	9	267	288	7	1	1	ENSG00000108469|ENST00000317905	hsa-miR-15a-5p	0	15	20	15	20	7345	6mer	x	6mer	0		0	RECQL5	protein_coding
ENSG00000108469	hsa-miR-15b-5p	ENSG00000108469|ENST00000317905	147	-24.24	2	21	263	288	23	0.5652	0.7391	ENSG00000108469|ENST00000317905	hsa-miR-15b-5p	0	15	20	15	20	7346	6mer	x	6mer	0		0	RECQL5	protein_coding
ENSG00000121570	hsa-miR-320c	ENSG00000121570|ENST00000335658	150	-17.12	2	16	286	306	15	0.7333	0.8667	ENSG00000121570|ENST00000335658	hsa-miR-320c	0	47	52	47	52	7366	6mer	x	6mer	0		0	DPPA4	protein_coding
ENSG00000121570	hsa-miR-320d	ENSG00000121570|ENST00000335658	150	-17.12	2	16	287	306	15	0.7333	0.8667	ENSG00000121570|ENST00000335658	hsa-miR-320d	0	47	52	47	52	7367	6mer	x	6mer	0		0	DPPA4	protein_coding
ENSG00000240230	hsa-miR-27a-3p	ENSG00000240230|ENST00000344111	149	-22.85	2	15	1539	1560	14	0.7857	0.8571	ENSG00000240230|ENST00000344111	hsa-miR-27a-3p	0	36	41	36	41	7393	6mer	x	6mer	0		0	COX19	protein_coding
ENSG00000240230	hsa-miR-27b-3p	ENSG00000240230|ENST00000344111	149	-20.05	2	15	1539	1560	14	0.7857	0.8571	ENSG00000240230|ENST00000344111	hsa-miR-27b-3p	0	36	41	36	41	7394	6mer	x	6mer	0		0	COX19	protein_coding
ENSG00000164916	hsa-miR-432-5p	ENSG00000164916|ENST00000328914	142	-14.66	2	22	6945	6965	20	0.6	0.7	ENSG00000164916|ENST00000328914	hsa-miR-432-5p	0	35	42	35	42	7410	8mer-1a	x	8mer-1a	0		0	FOXK1	protein_coding
ENSG00000133895	hsa-miR-151a-5p	ENSG00000133895|ENST00000315422	140	-15.17	2	9	290	310	7	1	1	ENSG00000133895|ENST00000315422	hsa-miR-151a-5p	0	31	37	31	37	7447	7mer-m8	x	7mer-m8	0		0	MEN1	protein_coding
ENSG00000120694	hsa-miR-30a-3p	ENSG00000120694|ENST00000320027	152	-11.51	2	21	58	79	19	0.6316	0.7368	ENSG00000120694|ENST00000320027	hsa-miR-30a-3p	0	51	58	51	58	7479	8mer-1a	x	8mer-1a	0		0	HSPH1	protein_coding
ENSG00000120694	hsa-miR-30e-3p	ENSG00000120694|ENST00000320027	156	-9.68	2	21	58	79	19	0.6842	0.7368	ENSG00000120694|ENST00000320027	hsa-miR-30e-3p	0	51	58	51	58	7480	8mer-1a	x	8mer-1a	0		0	HSPH1	protein_coding
ENSG00000133477	hsa-miR-148a-3p	ENSG00000133477|ENST00000333407	142	-13.41	2	16	10631	10653	15	0.7333	0.7333	ENSG00000133477|ENST00000333407	hsa-miR-148a-3p	0	39	44	39	44	7506	6mer	x	6mer	0		0	FAM83F	protein_coding
ENSG00000133477	hsa-miR-148b-3p	ENSG00000133477|ENST00000333407	142	-11.79	2	11	10632	10653	9	0.8889	0.8889	ENSG00000133477|ENST00000333407	hsa-miR-148b-3p	0	39	44	39	44	7507	6mer	x	6mer	0		0	FAM83F	protein_coding
ENSG00000100077	hsa-miR-148a-3p	ENSG00000100077|ENST00000324198	150	-15.48	2	21	3520	3543	21	0.7143	0.7143	ENSG00000100077|ENST00000324198	hsa-miR-148a-3p	0	48	54	48	54	7512	7mer-1a	x	7mer-1a	0		0	GRK3	protein_coding
ENSG00000100077	hsa-miR-148b-3p	ENSG00000100077|ENST00000324198	159	-18.49	2	21	3519	3543	22	0.7273	0.7273	ENSG00000100077|ENST00000324198	hsa-miR-148b-3p	0	48	54	48	54	7513	7mer-1a	x	7mer-1a	0		0	GRK3	protein_coding
ENSG00000100077	hsa-miR-30a-3p	ENSG00000100077|ENST00000324198	159	-14.82	2	19	6316	6335	17	0.8235	0.8235	ENSG00000100077|ENST00000324198	hsa-miR-30a-3p	0	50	57	50	57	7514	8mer-1a	x	8mer-1a	0		0	GRK3	protein_coding
ENSG00000100077	hsa-miR-30e-3p	ENSG00000100077|ENST00000324198	154	-14.22	2	18	6316	6335	16	0.8125	0.8125	ENSG00000100077|ENST00000324198	hsa-miR-30e-3p	0	50	57	50	57	7515	8mer-1a	x	8mer-1a	0		0	GRK3	protein_coding
ENSG00000110841	hsa-miR-142-5p	ENSG00000110841|ENST00000318304	149	-9.66	2	20	2122	2141	18	0.7222	0.7222	ENSG00000110841|ENST00000318304	hsa-miR-142-5p	0	42	48	42	48	7524	7mer-1a	x	7mer-1a	0		0	PPFIBP1	protein_coding
ENSG00000182810	hsa-miR-23a-3p	ENSG00000182810|ENST00000332395	150	-12.96	2	20	6	27	19	0.6842	0.7368	ENSG00000182810|ENST00000332395	hsa-miR-23a-3p	0	35	41	35	41	7541	7mer-1a	x	7mer-1a	0		0	DDX28	protein_coding
ENSG00000182810	hsa-miR-23b-3p	ENSG00000182810|ENST00000332395	149	-11.98	2	22	441	463	20	0.65	0.65	ENSG00000182810|ENST00000332395	hsa-miR-23b-3p	0	35	41	35	41	7542	7mer-1a	x	7mer-1a	0		0	DDX28	protein_coding
ENSG00000182810	hsa-miR-23c	ENSG00000182810|ENST00000332395	152	-11.9	2	21	442	463	19	0.6842	0.6842	ENSG00000182810|ENST00000332395	hsa-miR-23c	0	35	41	35	41	7543	7mer-1a	x	7mer-1a	0		0	DDX28	protein_coding
ENSG00000186260	hsa-miR-7847-3p	ENSG00000186260|ENST00000318282	144	-23.7	2	13	1076	1096	11	0.8182	0.8182	ENSG00000186260|ENST00000318282	hsa-miR-7847-3p	0	35	40	35	40	7563	6mer	x	6mer	0		0	MRTFB	protein_coding
ENSG00000185730	hsa-miR-130a-3p	ENSG00000185730|ENST00000330143	150	-12.95	2	11	2306	2327	9	1	1	ENSG00000185730|ENST00000330143	hsa-miR-130a-3p	0	25	30	25	30	7567	6mer	x	6mer	0		0	ZNF696	protein_coding
ENSG00000015475	hsa-miR-15a-5p	ENSG00000015475|ENST00000342111	140	-13.93	2	9	125	146	7	1	1	ENSG00000015475|ENST00000342111	hsa-miR-15a-5p	0	36	42	36	42	7571	7mer-1a	x	7mer-1a	0		0	BID	protein_coding
ENSG00000015475	hsa-miR-15b-5p	ENSG00000015475|ENST00000342111	140	-15.63	2	9	125	146	7	1	1	ENSG00000015475|ENST00000342111	hsa-miR-15b-5p	0	36	42	36	42	7572	7mer-1a	x	7mer-1a	0		0	BID	protein_coding
ENSG00000213699	hsa-miR-339-5p	ENSG00000213699|ENST00000344420	160	-23.23	2	18	1318	1341	17	0.7647	0.8824	ENSG00000213699|ENST00000344420	hsa-miR-339-5p	0	30	36	30	36	7589	7mer-m8	x	7mer-m8	0		0	SLC35F6	protein_coding
ENSG00000180979	hsa-miR-625-3p	ENSG00000180979|ENST00000323443	160	-19.67	2	21	5533	5554	19	0.6842	0.7895	ENSG00000180979|ENST00000323443	hsa-miR-625-3p	0	32	37	32	37	7597	6mer	x	6mer	0		0	LRRC57	protein_coding
ENSG00000166886	hsa-miR-361-3p	ENSG00000166886|ENST00000342556	155	-28.39	2	21	621	647	23	0.6522	0.7391	ENSG00000166886|ENST00000342556	hsa-miR-361-3p	0	50	55	50	55	7607	6mer	x	6mer	0		0	NAB2	protein_coding
ENSG00000105568	hsa-miR-15a-5p	ENSG00000105568|ENST00000322088	150	-19.27	2	17	573	593	15	0.8	0.8	ENSG00000105568|ENST00000322088	hsa-miR-15a-5p	0	50	55	50	55	7610	6mer	x	6mer	0		0	PPP2R1A	protein_coding
ENSG00000105568	hsa-miR-15b-5p	ENSG00000105568|ENST00000322088	158	-20.73	2	17	573	593	15	0.8667	0.8667	ENSG00000105568|ENST00000322088	hsa-miR-15b-5p	0	50	55	50	55	7611	6mer	x	6mer	0		0	PPP2R1A	protein_coding
ENSG00000182759	hsa-miR-361-3p	ENSG00000182759|ENST00000333480	154	-29.6	2	20	1056	1080	20	0.65	0.8	ENSG00000182759|ENST00000333480	hsa-miR-361-3p	0	54	60	54	60	7618	7mer-m8	x	7mer-m8	0		0	MAFA	protein_coding
ENSG00000131378	hsa-miR-24-3p	ENSG00000131378|ENST00000334133	154	-17.96	2	15	126	147	13	0.8462	0.8462	ENSG00000131378|ENST00000334133	hsa-miR-24-3p	0	18	24	18	24	7649	7mer-1a	x	7mer-1a	0		0	RFTN1	protein_coding
ENSG00000197951	hsa-miR-339-5p	ENSG00000197951|ENST00000328070	152	-25.04	2	14	1954	1978	14	0.8571	0.8571	ENSG00000197951|ENST00000328070	hsa-miR-339-5p	0	52	58	52	58	7659	7mer-1a	x	7mer-1a	0		0	ZNF71	protein_coding
ENSG00000197951	hsa-miR-7847-3p	ENSG00000197951|ENST00000328070	157	-24.56	2	18	467	487	16	0.75	0.8125	ENSG00000197951|ENST00000328070	hsa-miR-7847-3p	0	48	54	48	54	7660	7mer-1a	x	7mer-1a	0		0	ZNF71	protein_coding
ENSG00000141404	hsa-miR-24-3p	ENSG00000141404|ENST00000334049	163	-24.99	2	21	371	394	21	0.7619	0.7619	ENSG00000141404|ENST00000334049	hsa-miR-24-3p	0	35	42	35	42	7678	8mer-1a	x	8mer-1a	0		0	GNAL	protein_coding
ENSG00000141404	hsa-miR-664a-5p	ENSG00000141404|ENST00000334049	141	-15.73	2	10	1387	1410	8	0.875	1	ENSG00000141404|ENST00000334049	hsa-miR-664a-5p	0	38	43	38	43	7679	6mer	x	6mer	0		0	GNAL	protein_coding
ENSG00000172831	hsa-miR-150-5p	ENSG00000172831|ENST00000317091	140	-14.76	2	9	464	485	7	1	1	ENSG00000172831|ENST00000317091	hsa-miR-150-5p	0	42	48	42	48	7690	7mer-m8	x	7mer-m8	0		0	CES2	protein_coding
ENSG00000172831	hsa-miR-26a-5p	ENSG00000172831|ENST00000317091	152	-13.83	2	13	625	646	11	0.9091	0.9091	ENSG00000172831|ENST00000317091	hsa-miR-26a-5p	0	31	37	31	37	7691	7mer-m8	x	7mer-m8	0		0	CES2	protein_coding
ENSG00000124486	hsa-miR-339-5p	ENSG00000124486|ENST00000324545	160	-22.29	2	22	2206	2229	21	0.6667	0.8095	ENSG00000124486|ENST00000324545	hsa-miR-339-5p	0	43	49	43	49	7695	7mer-m8	x	7mer-m8	0		0	USP9X	protein_coding
ENSG00000106261	hsa-miR-191-5p	ENSG00000106261|ENST00000324306	146	-9.61	2	18	2731	2751	16	0.75	0.75	ENSG00000106261|ENST00000324306	hsa-miR-191-5p	0	22	27	22	27	7704	6mer	x	6mer	0		0	ZKSCAN1	protein_coding
ENSG00000167968	hsa-miR-15a-5p	ENSG00000167968|ENST00000320700	167	-24.54	2	21	133	155	20	0.7	0.9	ENSG00000167968|ENST00000320700	hsa-miR-15a-5p	0	20	25	20	25	7713	6mer	x	6mer	0		0	DNASE1L2	protein_coding
ENSG00000167968	hsa-miR-15b-5p	ENSG00000167968|ENST00000320700	179	-29.6	2	21	133	155	20	0.8	0.95	ENSG00000167968|ENST00000320700	hsa-miR-15b-5p	0	20	25	20	25	7714	6mer	x	6mer	0		0	DNASE1L2	protein_coding
ENSG00000181904	hsa-miR-148a-3p	ENSG00000181904|ENST00000338051	149	-17.51	2	20	1985	2005	18	0.6667	0.7778	ENSG00000181904|ENST00000338051	hsa-miR-148a-3p	0	22	27	22	27	7735	6mer	x	6mer	0		0	C5orf24	protein_coding
ENSG00000181904	hsa-miR-148b-3p	ENSG00000181904|ENST00000338051	149	-16.58	2	20	1985	2005	18	0.6667	0.7778	ENSG00000181904|ENST00000338051	hsa-miR-148b-3p	0	22	27	22	27	7736	6mer	x	6mer	0		0	C5orf24	protein_coding
ENSG00000139433	hsa-miR-664a-5p	ENSG00000139433|ENST00000318348	145	-15.45	2	23	772	796	22	0.5909	0.6818	ENSG00000139433|ENST00000318348	hsa-miR-664a-5p	0	40	45	40	45	7752	6mer	x	6mer	0		0	GLTP	protein_coding
ENSG00000167291	hsa-miR-15a-5p	ENSG00000167291|ENST00000340848	140	-13.33	2	9	2846	2867	7	1	1	ENSG00000167291|ENST00000340848	hsa-miR-15a-5p	0	34	39	34	39	7757	6mer	x	6mer	0		0	TBC1D16	protein_coding
ENSG00000167291	hsa-miR-15b-5p	ENSG00000167291|ENST00000340848	140	-13.02	2	9	2846	2867	7	1	1	ENSG00000167291|ENST00000340848	hsa-miR-15b-5p	0	34	39	34	39	7758	6mer	x	6mer	0		0	TBC1D16	protein_coding
ENSG00000181019	hsa-miR-423-3p	ENSG00000181019|ENST00000320623	167	-29.36	2	22	1369	1390	20	0.75	0.85	ENSG00000181019|ENST00000320623	hsa-miR-423-3p	0	43	48	43	48	7768	6mer	x	6mer	0		0	NQO1	protein_coding
ENSG00000185274	hsa-miR-15a-5p	ENSG00000185274|ENST00000333538	143	-14.73	2	19	1126	1148	19	0.6316	0.7895	ENSG00000185274|ENST00000333538	hsa-miR-15a-5p	0	41	46	41	46	7776	6mer	x	6mer	0		0	GALNT17	protein_coding
ENSG00000185274	hsa-miR-15b-5p	ENSG00000185274|ENST00000333538	145	-20.1	2	19	1126	1148	18	0.6111	0.7778	ENSG00000185274|ENST00000333538	hsa-miR-15b-5p	0	41	46	41	46	7777	6mer	x	6mer	0		0	GALNT17	protein_coding
ENSG00000186300	hsa-miR-744-5p	ENSG00000186300|ENST00000334241	145	-21	2	10	5147	5168	8	1	1	ENSG00000186300|ENST00000334241	hsa-miR-744-5p	0	40	46	40	46	7778	7mer-m8	x	7mer-m8	0		0	ZNF555	protein_coding
ENSG00000185823	hsa-miR-7847-3p	ENSG00000185823|ENST00000329468	153	-20.18	2	17	1831	1849	15	0.8	0.8667	ENSG00000185823|ENST00000329468	hsa-miR-7847-3p	0	34	40	34	40	7780	7mer-m8	x	7mer-m8	0		0	NPAP1	protein_coding
ENSG00000127329	hsa-miR-24-3p	ENSG00000127329|ENST00000334414	150	-17.8	2	11	2096	2117	9	1	1	ENSG00000127329|ENST00000334414	hsa-miR-24-3p	0	40	46	40	46	7804	7mer-1a	x	7mer-1a	0		0	PTPRB	protein_coding
ENSG00000215717	hsa-miR-28-3p	ENSG00000215717|ENST00000338272	152	-13.25	2	21	910	931	19	0.6316	0.7368	ENSG00000215717|ENST00000338272	hsa-miR-28-3p	0	24	30	24	30	7805	7mer-m8	x	7mer-m8	0		0	TMEM167B	protein_coding
ENSG00000185591	hsa-miR-320c	ENSG00000185591|ENST00000327443	153	-14.93	2	14	4021	4040	12	0.8333	0.9167	ENSG00000185591|ENST00000327443	hsa-miR-320c	0	43	49	43	49	7840	7mer-m8	x	7mer-m8	0		0	SP1	protein_coding
ENSG00000185591	hsa-miR-320d	ENSG00000185591|ENST00000327443	153	-14.93	2	14	4022	4040	12	0.8333	0.9167	ENSG00000185591|ENST00000327443	hsa-miR-320d	0	43	49	43	49	7841	7mer-m8	x	7mer-m8	0		0	SP1	protein_coding
ENSG00000099999	hsa-miR-192-5p	ENSG00000099999|ENST00000332468	146	-13.47	2	19	5099	5119	17	0.5882	0.7647	ENSG00000099999|ENST00000332468	hsa-miR-192-5p	0	47	53	47	53	7851	7mer-1a	x	7mer-1a	0		0	RNF215	protein_coding
ENSG00000099999	hsa-miR-215-5p	ENSG00000099999|ENST00000332468	146	-14.25	2	19	5099	5119	17	0.5882	0.7647	ENSG00000099999|ENST00000332468	hsa-miR-215-5p	0	47	53	47	53	7852	7mer-1a	x	7mer-1a	0		0	RNF215	protein_coding
ENSG00000188000	hsa-miR-196a-5p	ENSG00000188000|ENST00000344248	140	-10.17	2	9	607	628	7	1	1	ENSG00000188000|ENST00000344248	hsa-miR-196a-5p	0	33	38	33	38	7867	6mer	x	6mer	0		0	OR7D2	protein_coding
ENSG00000188000	hsa-miR-196b-5p	ENSG00000188000|ENST00000344248	140	-11.52	2	9	607	628	7	1	1	ENSG00000188000|ENST00000344248	hsa-miR-196b-5p	0	33	38	33	38	7868	6mer	x	6mer	0		0	OR7D2	protein_coding
ENSG00000137819	hsa-miR-146a-5p	ENSG00000137819|ENST00000340965	145	-16.43	2	20	605	628	20	0.7	0.7	ENSG00000137819|ENST00000340965	hsa-miR-146a-5p	0	23	29	23	29	7875	7mer-1a	x	7mer-1a	0		0	PAQR5	protein_coding
ENSG00000137819	hsa-miR-146b-5p	ENSG00000137819|ENST00000340965	152	-18.91	2	22	605	628	21	0.6667	0.7143	ENSG00000137819|ENST00000340965	hsa-miR-146b-5p	0	23	29	23	29	7876	7mer-1a	x	7mer-1a	0		0	PAQR5	protein_coding
ENSG00000105974	hsa-miR-30a-3p	ENSG00000105974|ENST00000341049	153	-16.82	2	21	1603	1622	19	0.6842	0.7895	ENSG00000105974|ENST00000341049	hsa-miR-30a-3p	0	40	46	40	46	7901	7mer-m8	x	7mer-m8	0		0	CAV1	protein_coding
ENSG00000105974	hsa-miR-30e-3p	ENSG00000105974|ENST00000341049	157	-18.43	2	21	1603	1622	19	0.7368	0.7895	ENSG00000105974|ENST00000341049	hsa-miR-30e-3p	0	40	46	40	46	7902	7mer-m8	x	7mer-m8	0		0	CAV1	protein_coding
ENSG00000115163	hsa-miR-432-5p	ENSG00000115163|ENST00000335756	147	-18.54	2	19	254	274	17	0.7059	0.7647	ENSG00000115163|ENST00000335756	hsa-miR-432-5p	0	41	46	41	46	7904	6mer	x	6mer	0		0	CENPA	protein_coding
ENSG00000101076	hsa-miR-146a-5p	ENSG00000101076|ENST00000316099	160	-21.76	2	19	2527	2547	17	0.7647	0.8824	ENSG00000101076|ENST00000316099	hsa-miR-146a-5p	0	38	44	38	44	7927	7mer-m8	x	7mer-m8	0		0	HNF4A	protein_coding
ENSG00000101076	hsa-miR-146b-5p	ENSG00000101076|ENST00000316099	159	-22.53	2	16	2525	2547	14	0.7857	0.9286	ENSG00000101076|ENST00000316099	hsa-miR-146b-5p	0	38	44	38	44	7928	7mer-m8	x	7mer-m8	0		0	HNF4A	protein_coding
ENSG00000101076	hsa-miR-27a-3p	ENSG00000101076|ENST00000316099	154	-14.8	2	19	4604	4624	17	0.7059	0.7647	ENSG00000101076|ENST00000316099	hsa-miR-27a-3p	0	25	30	25	30	7929	6mer	x	6mer	0		0	HNF4A	protein_coding
ENSG00000101076	hsa-miR-27b-3p	ENSG00000101076|ENST00000316099	159	-15.75	2	20	4604	4624	18	0.7222	0.7778	ENSG00000101076|ENST00000316099	hsa-miR-27b-3p	0	25	30	25	30	7930	6mer	x	6mer	0		0	HNF4A	protein_coding
ENSG00000187097	hsa-miR-150-5p	ENSG00000187097|ENST00000334696	159	-23.27	2	21	641	663	20	0.75	0.75	ENSG00000187097|ENST00000334696	hsa-miR-150-5p	0	37	42	37	42	7950	6mer	x	6mer	0		0	ENTPD5	protein_coding
ENSG00000113448	hsa-miR-382-5p	ENSG00000113448|ENST00000340635	145	-9.16	2	10	823	844	8	1	1	ENSG00000113448|ENST00000340635	hsa-miR-382-5p	0	34	39	34	39	8001	6mer	x	6mer	0		0	PDE4D	protein_coding
ENSG00000101224	hsa-miR-425-5p	ENSG00000101224|ENST00000344256	141	-10.77	2	10	145	167	8	0.875	1	ENSG00000101224|ENST00000344256	hsa-miR-425-5p	0	45	51	45	51	8017	7mer-m8	x	7mer-m8	0		0	CDC25B	protein_coding
ENSG00000163082	hsa-miR-625-3p	ENSG00000163082|ENST00000321276	141	-10.93	2	15	1665	1687	14	0.7143	0.7857	ENSG00000163082|ENST00000321276	hsa-miR-625-3p	0	28	34	28	34	8018	7mer-1a	x	7mer-1a	0		0	SGPP2	protein_coding
ENSG00000122779	hsa-miR-30a-3p	ENSG00000122779|ENST00000343526	156	-8.86	2	17	4091	4112	15	0.7333	0.8667	ENSG00000122779|ENST00000343526	hsa-miR-30a-3p	0	21	27	21	27	8023	7mer-1a	x	7mer-1a	0		0	TRIM24	protein_coding
ENSG00000122779	hsa-miR-30e-3p	ENSG00000122779|ENST00000343526	157	-8.68	2	19	4090	4112	18	0.7222	0.8333	ENSG00000122779|ENST00000343526	hsa-miR-30e-3p	0	21	27	21	27	8024	7mer-1a	x	7mer-1a	0		0	TRIM24	protein_coding
ENSG00000131969	hsa-miR-27a-3p	ENSG00000131969|ENST00000337334	140	-14.77	2	9	557	577	7	1	1	ENSG00000131969|ENST00000337334	hsa-miR-27a-3p	0	39	45	39	45	8057	7mer-1a	x	7mer-1a	0		0	ABHD12B	protein_coding
ENSG00000131969	hsa-miR-27b-3p	ENSG00000131969|ENST00000337334	141	-16.16	2	20	558	577	18	0.6667	0.6667	ENSG00000131969|ENST00000337334	hsa-miR-27b-3p	0	39	45	39	45	8058	7mer-1a	x	7mer-1a	0		0	ABHD12B	protein_coding
ENSG00000187650	hsa-miR-361-3p	ENSG00000187650|ENST00000339485	148	-22.97	2	18	1084	1108	18	0.6667	0.7778	ENSG00000187650|ENST00000339485	hsa-miR-361-3p	0	48	53	48	53	8064	6mer	x	6mer	0		0	VMAC	protein_coding
ENSG00000163932	hsa-miR-181a-5p	ENSG00000163932|ENST00000330452	145	-11.09	2	10	215	237	8	1	1	ENSG00000163932|ENST00000330452	hsa-miR-181a-5p	0	34	40	34	40	8093	7mer-m8	x	7mer-m8	0		0	PRKCD	protein_coding
ENSG00000163932	hsa-miR-181b-5p	ENSG00000163932|ENST00000330452	141	-10.32	2	15	214	237	14	0.7143	0.7857	ENSG00000163932|ENST00000330452	hsa-miR-181b-5p	0	34	40	34	40	8094	7mer-m8	x	7mer-m8	0		0	PRKCD	protein_coding
ENSG00000178522	hsa-miR-320c	ENSG00000178522|ENST00000322937	150	-16.68	2	11	31	50	9	1	1	ENSG00000178522|ENST00000322937	hsa-miR-320c	0	44	49	44	49	8120	6mer	x	6mer	0		0	AMBN	protein_coding
ENSG00000178522	hsa-miR-320d	ENSG00000178522|ENST00000322937	150	-16.21	2	11	32	50	9	1	1	ENSG00000178522|ENST00000322937	hsa-miR-320d	0	44	49	44	49	8121	6mer	x	6mer	0		0	AMBN	protein_coding
ENSG00000160058	hsa-miR-361-3p	ENSG00000160058|ENST00000341071	154	-25.73	2	19	2755	2777	17	0.7059	0.7647	ENSG00000160058|ENST00000341071	hsa-miR-361-3p	0	41	46	41	46	8126	6mer	x	6mer	0		0	BSDC1	protein_coding
ENSG00000165637	hsa-miR-134-5p	ENSG00000165637|ENST00000332211	148	-16.4	2	18	189	212	18	0.7222	0.7222	ENSG00000165637|ENST00000332211	hsa-miR-134-5p	0	39	44	39	44	8130	6mer	x	6mer	0		0	VDAC2	protein_coding
ENSG00000176953	hsa-miR-21-5p	ENSG00000176953|ENST00000320805	147	-14.15	2	19	61	85	20	0.75	0.75	ENSG00000176953|ENST00000320805	hsa-miR-21-5p	0	48	55	48	55	8149	8mer-1a	x	8mer-1a	0		0	NFATC2IP	protein_coding
ENSG00000188529	hsa-miR-28-3p	ENSG00000188529|ENST00000344989	162	-22.24	2	18	694	713	16	0.875	0.875	ENSG00000188529|ENST00000344989	hsa-miR-28-3p	0	27	32	27	32	8155	6mer	x	6mer	0		0	SRSF10	protein_coding
ENSG00000144868	hsa-miR-664a-5p	ENSG00000144868|ENST00000321871	162	-16.92	2	21	1764	1786	19	0.7368	0.8421	ENSG00000144868|ENST00000321871	hsa-miR-664a-5p	0	34	40	34	40	8157	7mer-m8	x	7mer-m8	0		0	TMEM108	protein_coding
ENSG00000189190	hsa-miR-224-5p	ENSG00000189190|ENST00000338230	151	-15.99	2	16	460	484	14	0.7857	0.7857	ENSG00000189190|ENST00000338230	hsa-miR-224-5p	0	32	37	32	37	8158	6mer	x	6mer	0		0	ZNF600	protein_coding
ENSG00000101974	hsa-miR-126-5p	ENSG00000101974|ENST00000327569	154	-7.59	2	20	2348	2371	21	0.7143	0.7143	ENSG00000101974|ENST00000327569	hsa-miR-126-5p	0	35	40	35	40	8159	6mer	x	6mer	0		0	ATP11C	protein_coding
ENSG00000101974	hsa-miR-30a-3p	ENSG00000101974|ENST00000327569	143	-8.04	2	21	2271	2293	20	0.6	0.7	ENSG00000101974|ENST00000327569	hsa-miR-30a-3p	0	24	30	24	30	8160	7mer-m8	x	7mer-m8	0		0	ATP11C	protein_coding
ENSG00000101974	hsa-miR-30e-3p	ENSG00000101974|ENST00000327569	147	-7.21	2	21	2271	2293	20	0.65	0.7	ENSG00000101974|ENST00000327569	hsa-miR-30e-3p	0	24	30	24	30	8161	7mer-m8	x	7mer-m8	0		0	ATP11C	protein_coding
ENSG00000182253	hsa-miR-320c	ENSG00000182253|ENST00000328642	153	-13.78	2	14	1984	2003	12	0.8333	0.9167	ENSG00000182253|ENST00000328642	hsa-miR-320c	0	35	41	35	41	8174	7mer-m8	x	7mer-m8	0		0	SYNM	protein_coding
ENSG00000182253	hsa-miR-320d	ENSG00000182253|ENST00000328642	153	-13.78	2	14	1985	2003	12	0.8333	0.9167	ENSG00000182253|ENST00000328642	hsa-miR-320d	0	35	41	35	41	8175	7mer-m8	x	7mer-m8	0		0	SYNM	protein_coding
ENSG00000196998	hsa-miR-24-3p	ENSG00000196998|ENST00000322995	168	-25.46	2	17	34	55	15	0.8667	0.9333	ENSG00000196998|ENST00000322995	hsa-miR-24-3p	0	15	21	15	21	8187	7mer-1a	x	7mer-1a	0		0	WDR45	protein_coding
ENSG00000127334	hsa-miR-24-3p	ENSG00000127334|ENST00000344096	143	-12.31	2	16	2172	2193	14	0.7143	0.7143	ENSG00000127334|ENST00000344096	hsa-miR-24-3p	0	19	25	19	25	8200	7mer-m8	x	7mer-m8	0		0	DYRK2	protein_coding
ENSG00000127334	hsa-miR-584-5p	ENSG00000127334|ENST00000344096	151	-17.17	2	21	2937	2960	21	0.6667	0.7143	ENSG00000127334|ENST00000344096	hsa-miR-584-5p	0	54	59	54	59	8202	6mer	x	6mer	0		0	DYRK2	protein_coding
ENSG00000188215	hsa-miR-320c	ENSG00000188215|ENST00000324344	150	-16.49	2	19	1588	1607	17	0.6471	0.7647	ENSG00000188215|ENST00000324344	hsa-miR-320c	0	36	42	36	42	8236	7mer-m8	x	7mer-m8	0		0	DCUN1D3	protein_coding
ENSG00000188215	hsa-miR-320d	ENSG00000188215|ENST00000324344	148	-16.18	2	13	1589	1607	11	0.8182	0.9091	ENSG00000188215|ENST00000324344	hsa-miR-320d	0	36	42	36	42	8237	7mer-m8	x	7mer-m8	0		0	DCUN1D3	protein_coding
ENSG00000175756	hsa-miR-15a-5p	ENSG00000175756|ENST00000321751	140	-16.32	2	9	12	33	7	1	1	ENSG00000175756|ENST00000321751	hsa-miR-15a-5p	0	33	38	33	38	8241	6mer	x	6mer	0		0	AURKAIP1	protein_coding
ENSG00000175756	hsa-miR-15b-5p	ENSG00000175756|ENST00000321751	140	-15.23	2	9	12	33	7	1	1	ENSG00000175756|ENST00000321751	hsa-miR-15b-5p	0	33	38	33	38	8242	6mer	x	6mer	0		0	AURKAIP1	protein_coding
ENSG00000187959	hsa-miR-339-5p	ENSG00000187959|ENST00000344935	140	-18.07	2	9	24	45	7	1	1	ENSG00000187959|ENST00000344935	hsa-miR-339-5p	0	15	20	15	20	8248	6mer	x	6mer	0		0	CPSF4L	protein_coding
ENSG00000065989	hsa-miR-7847-3p	ENSG00000065989|ENST00000344979	153	-27.7	2	20	8	32	22	0.6818	0.7727	ENSG00000065989|ENST00000344979	hsa-miR-7847-3p	0	42	47	42	47	8284	6mer	x	6mer	0		0	PDE4A	protein_coding
ENSG00000131943	hsa-miR-155-5p	ENSG00000131943|ENST00000323670	156	-14.94	2	23	844	869	23	0.6522	0.7826	ENSG00000131943|ENST00000323670	hsa-miR-155-5p	0	26	32	26	32	8295	7mer-m8	x	7mer-m8	0		0	C19orf12	protein_coding
ENSG00000169379	hsa-miR-150-5p	ENSG00000169379|ENST00000335438	144	-12.23	2	17	2845	2866	15	0.6667	0.7333	ENSG00000169379|ENST00000335438	hsa-miR-150-5p	0	46	53	46	53	8298	8mer-1a	x	8mer-1a	0		0	ARL13B	protein_coding
ENSG00000100626	hsa-miR-335-5p	ENSG00000100626|ENST00000337827	142	-13.11	2	11	169	191	9	0.8889	0.8889	ENSG00000100626|ENST00000337827	hsa-miR-335-5p	0	41	46	41	46	8303	6mer	x	6mer	0		0	GALNT16	protein_coding
ENSG00000184349	hsa-miR-7847-3p	ENSG00000184349|ENST00000333274	141	-16.27	2	12	3793	3812	10	0.9	0.9	ENSG00000184349|ENST00000333274	hsa-miR-7847-3p	0	40	45	40	45	8305	6mer	x	6mer	0		0	EFNA5	protein_coding
ENSG00000103522	hsa-miR-150-5p	ENSG00000103522|ENST00000337929	157	-25.36	2	18	1652	1673	16	0.6875	0.875	ENSG00000103522|ENST00000337929	hsa-miR-150-5p	0	30	35	30	35	8361	6mer	x	6mer	0		0	IL21R	protein_coding
ENSG00000007908	hsa-miR-126-5p	ENSG00000007908|ENST00000333360	150	-4.7	2	20	423	444	19	0.6842	0.7368	ENSG00000007908|ENST00000333360	hsa-miR-126-5p	0	27	32	27	32	8371	6mer	x	6mer	0		0	SELE	protein_coding
ENSG00000158321	hsa-miR-23a-3p	ENSG00000158321|ENST00000342771	140	-8.04	2	9	1850	1870	7	1	1	ENSG00000158321|ENST00000342771	hsa-miR-23a-3p	0	22	27	22	27	8372	6mer	x	6mer	0		0	AUTS2	protein_coding
ENSG00000158321	hsa-miR-23b-3p	ENSG00000158321|ENST00000342771	140	-8.43	2	9	1848	1870	7	1	1	ENSG00000158321|ENST00000342771	hsa-miR-23b-3p	0	22	27	22	27	8373	6mer	x	6mer	0		0	AUTS2	protein_coding
ENSG00000158321	hsa-miR-23c	ENSG00000158321|ENST00000342771	141	-9.74	2	21	1851	1870	19	0.6316	0.6842	ENSG00000158321|ENST00000342771	hsa-miR-23c	0	22	27	22	27	8374	6mer	x	6mer	0		0	AUTS2	protein_coding
ENSG00000171634	hsa-miR-128-3p	ENSG00000171634|ENST00000321892	146	-13.23	2	20	1808	1829	19	0.6316	0.7368	ENSG00000171634|ENST00000321892	hsa-miR-128-3p	0	33	40	33	40	8376	8mer-1a	x	8mer-1a	0		0	BPTF	protein_coding
ENSG00000171634	hsa-miR-181a-5p	ENSG00000171634|ENST00000321892	156	-14.25	2	21	865	887	19	0.6316	0.7895	ENSG00000171634|ENST00000321892	hsa-miR-181a-5p	0	52	57	52	57	8378	6mer	x	6mer	0		0	BPTF	protein_coding
ENSG00000171634	hsa-miR-181b-5p	ENSG00000171634|ENST00000321892	152	-24.05	2	22	859	887	26	0.6538	0.6538	ENSG00000171634|ENST00000321892	hsa-miR-181b-5p	0	52	57	52	57	8379	6mer	x	6mer	0		0	BPTF	protein_coding
ENSG00000182504	hsa-miR-425-5p	ENSG00000182504|ENST00000341893	169	-14.85	2	22	4149	4171	20	0.75	0.8	ENSG00000182504|ENST00000341893	hsa-miR-425-5p	0	46	51	46	51	8386	6mer	x	6mer	0		0	CEP97	protein_coding
ENSG00000117036	hsa-miR-26a-5p	ENSG00000117036|ENST00000326786	168	-20.18	2	18	493	515	17	0.8235	0.9412	ENSG00000117036|ENST00000326786	hsa-miR-26a-5p	0	46	53	46	53	8417	8mer-1a	x	8mer-1a	0		0	ETV3	protein_coding
ENSG00000177932	hsa-miR-224-5p	ENSG00000177932|ENST00000315475	148	-15.53	2	19	145	168	17	0.7059	0.7647	ENSG00000177932|ENST00000315475	hsa-miR-224-5p	0	20	25	20	25	8422	6mer	x	6mer	0		0	ZNF354C	protein_coding
ENSG00000177932	hsa-miR-30a-5p	ENSG00000177932|ENST00000315475	160	-12.96	2	21	2217	2238	19	0.7368	0.7368	ENSG00000177932|ENST00000315475	hsa-miR-30a-5p	0	28	34	28	34	8423	7mer-1a	x	7mer-1a	0		0	ZNF354C	protein_coding
ENSG00000177932	hsa-miR-30b-5p	ENSG00000177932|ENST00000315475	145	-9.6	2	10	2217	2238	8	1	1	ENSG00000177932|ENST00000315475	hsa-miR-30b-5p	0	28	34	28	34	8424	7mer-1a	x	7mer-1a	0		0	ZNF354C	protein_coding
ENSG00000177932	hsa-miR-30c-5p	ENSG00000177932|ENST00000315475	145	-8.49	2	10	2216	2238	8	1	1	ENSG00000177932|ENST00000315475	hsa-miR-30c-5p	0	28	34	28	34	8425	7mer-1a	x	7mer-1a	0		0	ZNF354C	protein_coding
ENSG00000177932	hsa-miR-30d-5p	ENSG00000177932|ENST00000315475	152	-10.76	2	21	2217	2238	19	0.6842	0.6842	ENSG00000177932|ENST00000315475	hsa-miR-30d-5p	0	28	34	28	34	8426	7mer-1a	x	7mer-1a	0		0	ZNF354C	protein_coding
ENSG00000067048	hsa-miR-15a-5p	ENSG00000067048|ENST00000336079	150	-13.18	2	19	1691	1712	17	0.6471	0.7647	ENSG00000067048|ENST00000336079	hsa-miR-15a-5p	0	46	52	46	52	8445	7mer-m8	x	7mer-m8	0		0	DDX3Y	protein_coding
ENSG00000067048	hsa-miR-15b-5p	ENSG00000067048|ENST00000336079	146	-12.71	2	21	1692	1712	19	0.6316	0.7368	ENSG00000067048|ENST00000336079	hsa-miR-15b-5p	0	46	52	46	52	8447	7mer-m8	x	7mer-m8	0		0	DDX3Y	protein_coding
ENSG00000105662	hsa-miR-361-3p	ENSG00000105662|ENST00000321949	147	-21.58	2	21	2037	2062	22	0.6364	0.6818	ENSG00000105662|ENST00000321949	hsa-miR-361-3p	0	48	54	48	54	8453	7mer-m8	x	7mer-m8	0		0	CRTC1	protein_coding
ENSG00000184207	hsa-miR-150-5p	ENSG00000184207|ENST00000333503	148	-18.19	2	17	397	418	15	0.6667	0.8	ENSG00000184207|ENST00000333503	hsa-miR-150-5p	0	39	45	39	45	8454	7mer-1a	x	7mer-1a	0		0	PGP	protein_coding
ENSG00000111653	hsa-miR-23a-3p	ENSG00000111653|ENST00000341550	150	-14.71	2	11	669	689	9	1	1	ENSG00000111653|ENST00000341550	hsa-miR-23a-3p	0	45	50	45	50	8472	6mer	x	6mer	0		0	ING4	protein_coding
ENSG00000111653	hsa-miR-23b-3p	ENSG00000111653|ENST00000341550	150	-16.91	2	11	667	689	9	1	1	ENSG00000111653|ENST00000341550	hsa-miR-23b-3p	0	45	50	45	50	8473	6mer	x	6mer	0		0	ING4	protein_coding
ENSG00000111653	hsa-miR-23c	ENSG00000111653|ENST00000341550	150	-17.35	2	11	668	689	9	1	1	ENSG00000111653|ENST00000341550	hsa-miR-23c	0	45	50	45	50	8474	6mer	x	6mer	0		0	ING4	protein_coding
ENSG00000137872	hsa-miR-30a-5p	ENSG00000137872|ENST00000316364	147	-14.84	2	20	651	670	18	0.7222	0.7778	ENSG00000137872|ENST00000316364	hsa-miR-30a-5p	0	27	33	27	33	8508	7mer-m8	x	7mer-m8	0		0	SEMA6D	protein_coding
ENSG00000137872	hsa-miR-30b-5p	ENSG00000137872|ENST00000316364	150	-14.11	2	21	647	670	21	0.6667	0.7619	ENSG00000137872|ENST00000316364	hsa-miR-30b-5p	0	27	33	27	33	8509	7mer-m8	x	7mer-m8	0		0	SEMA6D	protein_coding
ENSG00000137872	hsa-miR-30c-5p	ENSG00000137872|ENST00000316364	149	-15.5	2	17	644	670	19	0.7895	0.7895	ENSG00000137872|ENST00000316364	hsa-miR-30c-5p	0	27	33	27	33	8510	7mer-m8	x	7mer-m8	0		0	SEMA6D	protein_coding
ENSG00000137872	hsa-miR-30d-5p	ENSG00000137872|ENST00000316364	150	-14.26	2	15	649	670	13	0.7692	0.8462	ENSG00000137872|ENST00000316364	hsa-miR-30d-5p	0	27	33	27	33	8511	7mer-m8	x	7mer-m8	0		0	SEMA6D	protein_coding
ENSG00000178502	hsa-miR-25-3p	ENSG00000178502|ENST00000319121	163	-20.05	2	16	440	461	14	0.8571	0.9286	ENSG00000178502|ENST00000319121	hsa-miR-25-3p	0	45	51	45	51	8543	7mer-m8	x	7mer-m8	0		0	KLHL11	protein_coding
ENSG00000178502	hsa-miR-92a-3p	ENSG00000178502|ENST00000319121	161	-22.34	2	19	439	461	18	0.7778	0.8333	ENSG00000178502|ENST00000319121	hsa-miR-92a-3p	0	45	51	45	51	8544	7mer-m8	x	7mer-m8	0		0	KLHL11	protein_coding
ENSG00000069667	hsa-miR-15a-5p	ENSG00000069667|ENST00000335670	153	-16.13	2	20	762	782	18	0.6667	0.8333	ENSG00000069667|ENST00000335670	hsa-miR-15a-5p	0	39	45	39	45	8565	7mer-1a	x	7mer-1a	0		0	RORA	protein_coding
ENSG00000069667	hsa-miR-15b-5p	ENSG00000069667|ENST00000335670	145	-14.12	2	20	762	782	18	0.6111	0.7778	ENSG00000069667|ENST00000335670	hsa-miR-15b-5p	0	39	45	39	45	8566	7mer-1a	x	7mer-1a	0		0	RORA	protein_coding
ENSG00000119383	hsa-miR-15a-5p	ENSG00000119383|ENST00000337738	144	-13.48	2	13	359	380	11	0.8182	0.8182	ENSG00000119383|ENST00000337738	hsa-miR-15a-5p	0	31	37	31	37	8569	7mer-m8	x	7mer-m8	0		0	PTPA	protein_coding
ENSG00000119383	hsa-miR-15b-5p	ENSG00000119383|ENST00000337738	141	-11.79	2	20	360	380	18	0.6111	0.7222	ENSG00000119383|ENST00000337738	hsa-miR-15b-5p	0	31	37	31	37	8570	7mer-m8	x	7mer-m8	0		0	PTPA	protein_coding
ENSG00000053918	hsa-miR-24-3p	ENSG00000053918|ENST00000335475	156	-23.17	2	20	805	824	18	0.7778	0.7778	ENSG00000053918|ENST00000335475	hsa-miR-24-3p	0	26	32	26	32	8579	7mer-m8	x	7mer-m8	0		0	KCNQ1	protein_coding
ENSG00000168826	hsa-miR-361-3p	ENSG00000168826|ENST00000337872	156	-22.98	2	22	140	166	24	0.6667	0.7083	ENSG00000168826|ENST00000337872	hsa-miR-361-3p	0	17	22	17	22	8594	6mer	x	6mer	0		0	ZBTB49	protein_coding
ENSG00000090530	hsa-miR-199a-5p	ENSG00000090530|ENST00000319332	148	-17.09	2	22	263	289	24	0.625	0.6667	ENSG00000090530|ENST00000319332	hsa-miR-199a-5p	0	37	42	37	42	8600	6mer	x	6mer	0		0	P3H2	protein_coding
ENSG00000168575	hsa-miR-126-5p	ENSG00000168575|ENST00000342228	153	-5.99	2	18	195	215	16	0.6875	0.8125	ENSG00000168575|ENST00000342228	hsa-miR-126-5p	0	22	28	22	28	8605	7mer-1a	x	7mer-1a	0		0	SLC20A2	protein_coding
ENSG00000186103	hsa-miR-25-3p	ENSG00000186103|ENST00000334384	156	-15.96	2	19	2824	2844	17	0.7647	0.8235	ENSG00000186103|ENST00000334384	hsa-miR-25-3p	0	38	44	38	44	8625	7mer-1a	x	7mer-1a	0		0	ARGFX	protein_coding
ENSG00000186103	hsa-miR-92a-3p	ENSG00000186103|ENST00000334384	146	-18.14	2	18	2825	2844	16	0.75	0.75	ENSG00000186103|ENST00000334384	hsa-miR-92a-3p	0	38	44	38	44	8626	7mer-1a	x	7mer-1a	0		0	ARGFX	protein_coding
ENSG00000131653	hsa-miR-320c	ENSG00000131653|ENST00000326181	153	-19.06	2	19	1376	1392	17	0.8235	0.8235	ENSG00000131653|ENST00000326181	hsa-miR-320c	0	45	50	45	50	8636	6mer	x	6mer	0		0	TRAF7	protein_coding
ENSG00000131653	hsa-miR-320d	ENSG00000131653|ENST00000326181	148	-19.19	2	18	1377	1392	16	0.8125	0.8125	ENSG00000131653|ENST00000326181	hsa-miR-320d	0	45	50	45	50	8637	6mer	x	6mer	0		0	TRAF7	protein_coding
ENSG00000160570	hsa-miR-432-5p	ENSG00000160570|ENST00000336034	151	-17.7	2	18	10	34	18	0.7778	0.7778	ENSG00000160570|ENST00000336034	hsa-miR-432-5p	0	43	48	43	48	8639	6mer	x	6mer	0		0	DEDD2	protein_coding
ENSG00000177992	hsa-miR-339-5p	ENSG00000177992|ENST00000325643	168	-34.5	2	18	18	42	18	0.8333	0.8889	ENSG00000177992|ENST00000325643	hsa-miR-339-5p	0	28	34	28	34	8656	7mer-1a	x	7mer-1a	0		0	SPATA31E1	protein_coding
ENSG00000153071	hsa-miR-320c	ENSG00000153071|ENST00000320816	157	-22.14	2	18	93	112	16	0.6875	0.875	ENSG00000153071|ENST00000320816	hsa-miR-320c	0	19	26	19	26	8662	8mer-1a	x	8mer-1a	0		0	DAB2	protein_coding
ENSG00000153071	hsa-miR-320d	ENSG00000153071|ENST00000320816	157	-19.86	2	18	94	112	16	0.6875	0.875	ENSG00000153071|ENST00000320816	hsa-miR-320d	0	19	26	19	26	8663	8mer-1a	x	8mer-1a	0		0	DAB2	protein_coding
ENSG00000145725	hsa-miR-150-5p	ENSG00000145725|ENST00000321521	154	-23.98	2	20	9798	9820	19	0.6316	0.8421	ENSG00000145725|ENST00000321521	hsa-miR-150-5p	0	37	42	37	42	8664	6mer	x	6mer	0		0	PPIP5K2	protein_coding
ENSG00000147548	hsa-miR-361-3p	ENSG00000147548|ENST00000317025	156	-21.17	2	17	5509	5531	15	0.7333	0.8667	ENSG00000147548|ENST00000317025	hsa-miR-361-3p	0	45	51	45	51	8670	7mer-m8	x	7mer-m8	0		0	NSD3	protein_coding
ENSG00000103855	hsa-miR-27a-3p	ENSG00000103855|ENST00000318443	150	-24.54	2	20	51	73	20	0.65	0.75	ENSG00000103855|ENST00000318443	hsa-miR-27a-3p	0	55	60	55	60	8673	6mer	x	6mer	0		0	CD276	protein_coding
ENSG00000103855	hsa-miR-27b-3p	ENSG00000103855|ENST00000318443	148	-19.73	2	18	51	73	18	0.6667	0.7778	ENSG00000103855|ENST00000318443	hsa-miR-27b-3p	0	55	60	55	60	8674	6mer	x	6mer	0		0	CD276	protein_coding
ENSG00000100354	hsa-miR-130a-3p	ENSG00000100354|ENST00000335727	158	-18.64	2	21	10352	10372	19	0.6842	0.8421	ENSG00000100354|ENST00000335727	hsa-miR-130a-3p	0	28	34	28	34	8688	7mer-1a	x	7mer-1a	0		0	TNRC6B	protein_coding
ENSG00000165376	hsa-miR-151a-3p	ENSG00000165376|ENST00000336803	140	-17.92	2	9	1465	1485	7	1	1	ENSG00000165376|ENST00000336803	hsa-miR-151a-3p	0	30	35	30	35	8697	6mer	x	6mer	0		0	CLDN2	protein_coding
ENSG00000141428	hsa-miR-382-5p	ENSG00000141428|ENST00000333234	146	-9.16	2	21	27	47	19	0.5789	0.7895	ENSG00000141428|ENST00000333234	hsa-miR-382-5p	0	17	22	17	22	8707	6mer	x	6mer	0		0	C18orf21	protein_coding
ENSG00000144730	hsa-miR-744-5p	ENSG00000144730|ENST00000320057	141	-18.69	2	12	1665	1685	10	0.9	0.9	ENSG00000144730|ENST00000320057	hsa-miR-744-5p	0	48	53	48	53	8712	6mer	x	6mer	0		0	IL17RD	protein_coding
ENSG00000089505	hsa-miR-15a-5p	ENSG00000089505|ENST00000336328	155	-16.99	2	21	101	124	21	0.7143	0.7143	ENSG00000089505|ENST00000336328	hsa-miR-15a-5p	0	17	22	17	22	8717	6mer	x	6mer	0		0	CMTM1	protein_coding
ENSG00000089505	hsa-miR-15b-5p	ENSG00000089505|ENST00000336328	153	-15.25	2	20	104	124	18	0.6667	0.8333	ENSG00000089505|ENST00000336328	hsa-miR-15b-5p	0	17	22	17	22	8718	6mer	x	6mer	0		0	CMTM1	protein_coding
ENSG00000111679	hsa-miR-128-3p	ENSG00000111679|ENST00000318974	158	-20.06	2	20	195	216	20	0.75	0.75	ENSG00000111679|ENST00000318974	hsa-miR-128-3p	0	16	22	16	22	8726	7mer-m8	x	7mer-m8	0		0	PTPN6	protein_coding
ENSG00000172197	hsa-miR-361-3p	ENSG00000172197|ENST00000324607	141	-21.75	2	22	1708	1730	20	0.55	0.65	ENSG00000172197|ENST00000324607	hsa-miR-361-3p	0	15	20	15	20	8746	6mer	x	6mer	0		0	MBOAT1	protein_coding
ENSG00000181852	hsa-miR-664a-5p	ENSG00000181852|ENST00000345093	140	-12.59	2	9	3082	3105	7	1	1	ENSG00000181852|ENST00000345093	hsa-miR-664a-5p	0	53	58	53	58	8755	6mer	x	6mer	0		0	RNF41	protein_coding
ENSG00000167751	hsa-miR-664a-5p	ENSG00000167751|ENST00000325321	145	-17.29	2	10	865	888	8	1	1	ENSG00000167751|ENST00000325321	hsa-miR-664a-5p	0	33	38	33	38	8760	6mer	x	6mer	0		0	KLK2	protein_coding
ENSG00000188997	hsa-miR-24-3p	ENSG00000188997|ENST00000340067	145	-19	2	10	2379	2400	8	1	1	ENSG00000188997|ENST00000340067	hsa-miR-24-3p	0	40	47	40	47	8761	8mer-1a	x	8mer-1a	0		0	KCTD21	protein_coding
ENSG00000188997	hsa-miR-664a-5p	ENSG00000188997|ENST00000340067	152	-18.09	2	17	702	725	15	0.7333	0.8	ENSG00000188997|ENST00000340067	hsa-miR-664a-5p	0	43	48	43	48	8762	6mer	x	6mer	0		0	KCTD21	protein_coding
ENSG00000136167	hsa-miR-664a-5p	ENSG00000136167|ENST00000323076	150	-19.21	2	11	1114	1137	9	1	1	ENSG00000136167|ENST00000323076	hsa-miR-664a-5p	0	30	36	30	36	8774	7mer-1a	x	7mer-1a	0		0	LCP1	protein_coding
ENSG00000158467	hsa-miR-339-5p	ENSG00000158467|ENST00000325006	151	-19.54	2	18	2492	2513	16	0.75	0.8125	ENSG00000158467|ENST00000325006	hsa-miR-339-5p	0	36	41	36	41	8799	6mer	x	6mer	0		0	AHCYL2	protein_coding
ENSG00000117525	hsa-miR-27a-3p	ENSG00000117525|ENST00000334047	146	-12.48	2	17	24	46	17	0.7059	0.8235	ENSG00000117525|ENST00000334047	hsa-miR-27a-3p	0	19	24	19	24	8809	6mer	x	6mer	0		0	F3	protein_coding
ENSG00000117525	hsa-miR-27b-3p	ENSG00000117525|ENST00000334047	146	-12.92	2	17	24	46	17	0.7059	0.8235	ENSG00000117525|ENST00000334047	hsa-miR-27b-3p	0	19	24	19	24	8810	6mer	x	6mer	0		0	F3	protein_coding
ENSG00000123933	hsa-miR-335-5p	ENSG00000123933|ENST00000337190	148	-16.03	2	13	2245	2267	11	0.8182	0.9091	ENSG00000123933|ENST00000337190	hsa-miR-335-5p	0	40	45	40	45	8818	6mer	x	6mer	0		0	MXD4	protein_coding
ENSG00000163492	hsa-miR-26a-5p	ENSG00000163492|ENST00000343876	148	-16.74	2	19	875	899	20	0.7	0.75	ENSG00000163492|ENST00000343876	hsa-miR-26a-5p	0	48	54	48	54	8865	7mer-1a	x	7mer-1a	0		0	CCDC141	protein_coding
ENSG00000164053	hsa-miR-339-5p	ENSG00000164053|ENST00000320211	158	-33.87	2	22	936	963	26	0.6923	0.7308	ENSG00000164053|ENST00000320211	hsa-miR-339-5p	0	39	45	39	45	8871	7mer-1a	x	7mer-1a	0		0	ATRIP	protein_coding
ENSG00000008952	hsa-miR-664a-5p	ENSG00000008952|ENST00000337002	146	-15.54	2	18	4808	4829	16	0.75	0.75	ENSG00000008952|ENST00000337002	hsa-miR-664a-5p	0	15	20	15	20	8923	6mer	x	6mer	0		0	SEC62	protein_coding
ENSG00000144218	hsa-miR-30a-5p	ENSG00000144218|ENST00000317233	160	-16.57	2	17	1228	1249	15	0.8	0.8667	ENSG00000144218|ENST00000317233	hsa-miR-30a-5p	0	33	39	33	39	8961	7mer-m8	x	7mer-m8	0		0	AFF3	protein_coding
ENSG00000144218	hsa-miR-30b-5p	ENSG00000144218|ENST00000317233	167	-21.65	2	20	1228	1249	18	0.7778	0.8333	ENSG00000144218|ENST00000317233	hsa-miR-30b-5p	0	33	39	33	39	8962	7mer-m8	x	7mer-m8	0		0	AFF3	protein_coding
ENSG00000144218	hsa-miR-30c-5p	ENSG00000144218|ENST00000317233	169	-21.29	2	22	1227	1249	20	0.75	0.8	ENSG00000144218|ENST00000317233	hsa-miR-30c-5p	0	33	39	33	39	8963	7mer-m8	x	7mer-m8	0		0	AFF3	protein_coding
ENSG00000144218	hsa-miR-30d-5p	ENSG00000144218|ENST00000317233	164	-17.59	2	17	1228	1249	15	0.8667	0.8667	ENSG00000144218|ENST00000317233	hsa-miR-30d-5p	0	33	39	33	39	8964	7mer-m8	x	7mer-m8	0		0	AFF3	protein_coding
ENSG00000144218	hsa-miR-432-5p	ENSG00000144218|ENST00000317233	152	-21.95	2	21	704	725	20	0.75	0.75	ENSG00000144218|ENST00000317233	hsa-miR-432-5p	0	54	60	54	60	8965	7mer-m8	x	7mer-m8	0		0	AFF3	protein_coding
ENSG00000139517	hsa-miR-664a-5p	ENSG00000139517|ENST00000316334	141	-16.08	2	10	651	674	8	0.875	1	ENSG00000139517|ENST00000316334	hsa-miR-664a-5p	0	33	38	33	38	8967	6mer	x	6mer	0		0	LNX2	protein_coding
ENSG00000169594	hsa-miR-361-3p	ENSG00000169594|ENST00000345382	152	-25.15	2	22	312	335	21	0.619	0.7619	ENSG00000169594|ENST00000345382	hsa-miR-361-3p	0	21	28	21	28	8970	8mer-1a	x	8mer-1a	0		0	BNC1	protein_coding
ENSG00000181322	hsa-miR-425-5p	ENSG00000181322|ENST00000333911	150	-12.82	2	20	554	577	19	0.6842	0.7368	ENSG00000181322|ENST00000333911	hsa-miR-425-5p	0	34	39	34	39	8971	6mer	x	6mer	0		0	NME9	protein_coding
ENSG00000145687	hsa-miR-15a-5p	ENSG00000145687|ENST00000320672	142	-16.98	2	20	1118	1140	19	0.5789	0.7368	ENSG00000145687|ENST00000320672	hsa-miR-15a-5p	0	48	53	48	53	8978	6mer	x	6mer	0		0	SSBP2	protein_coding
ENSG00000145687	hsa-miR-15b-5p	ENSG00000145687|ENST00000320672	150	-18.55	2	20	1118	1140	19	0.6316	0.7895	ENSG00000145687|ENST00000320672	hsa-miR-15b-5p	0	48	53	48	53	8979	6mer	x	6mer	0		0	SSBP2	protein_coding
ENSG00000141179	hsa-miR-361-3p	ENSG00000141179|ENST00000325214	146	-19.81	2	21	729	750	19	0.6842	0.6842	ENSG00000141179|ENST00000325214	hsa-miR-361-3p	0	48	53	48	53	9011	6mer	x	6mer	0		0	PCTP	protein_coding
ENSG00000178562	hsa-miR-146a-5p	ENSG00000178562|ENST00000324106	146	-11.42	2	18	737	756	16	0.75	0.75	ENSG00000178562|ENST00000324106	hsa-miR-146a-5p	0	52	58	52	58	9013	7mer-m8	x	7mer-m8	0		0	CD28	protein_coding
ENSG00000178562	hsa-miR-146b-5p	ENSG00000178562|ENST00000324106	146	-11.42	2	18	736	756	16	0.75	0.75	ENSG00000178562|ENST00000324106	hsa-miR-146b-5p	0	52	58	52	58	9014	7mer-m8	x	7mer-m8	0		0	CD28	protein_coding
ENSG00000167272	hsa-miR-151a-3p	ENSG00000167272|ENST00000341039	158	-14.28	2	20	398	419	19	0.6842	0.8421	ENSG00000167272|ENST00000341039	hsa-miR-151a-3p	0	15	20	15	20	9015	6mer	x	6mer	0		0	POP5	protein_coding
ENSG00000167858	hsa-miR-664a-5p	ENSG00000167858|ENST00000338694	151	-20.6	2	12	74	97	10	0.9	1	ENSG00000167858|ENST00000338694	hsa-miR-664a-5p	0	51	57	51	57	9032	7mer-1a	x	7mer-1a	0		0	TEKT1	protein_coding
ENSG00000196230	hsa-miR-150-5p	ENSG00000196230|ENST00000327892	161	-27.79	2	19	667	690	19	0.7895	0.7895	ENSG00000196230|ENST00000327892	hsa-miR-150-5p	0	33	39	33	39	9045	7mer-1a	x	7mer-1a	0		0	TUBB	protein_coding
ENSG00000053702	hsa-miR-664a-5p	ENSG00000053702|ENST00000337508	141	-13.02	2	10	1263	1286	8	0.875	1	ENSG00000053702|ENST00000337508	hsa-miR-664a-5p	0	23	28	23	28	9066	6mer	x	6mer	0		0	NRIP2	protein_coding
ENSG00000185504	hsa-miR-150-5p	ENSG00000185504|ENST00000327787	142	-12.5	2	11	174	195	9	0.8889	0.8889	ENSG00000185504|ENST00000327787	hsa-miR-150-5p	0	48	54	48	54	9080	7mer-1a	x	7mer-1a	0		0	FAAP100	protein_coding
ENSG00000215193	hsa-miR-128-3p	ENSG00000215193|ENST00000329627	170	-25.96	2	20	1810	1832	20	0.8	0.85	ENSG00000215193|ENST00000329627	hsa-miR-128-3p	0	55	60	55	60	9088	6mer	x	6mer	0		0	PEX26	protein_coding
ENSG00000121900	hsa-miR-142-5p	ENSG00000121900|ENST00000329151	140	-5.96	2	9	160	180	7	1	1	ENSG00000121900|ENST00000329151	hsa-miR-142-5p	0	44	50	44	50	9096	7mer-1a	x	7mer-1a	0		0	TMEM54	protein_coding
ENSG00000141279	hsa-miR-15a-5p	ENSG00000141279|ENST00000322157	144	-21.26	2	18	9	35	21	0.619	0.7143	ENSG00000141279|ENST00000322157	hsa-miR-15a-5p	0	42	48	42	48	9102	7mer-m8	x	7mer-m8	0		0	NPEPPS	protein_coding
ENSG00000141279	hsa-miR-15b-5p	ENSG00000141279|ENST00000322157	144	-17.18	2	13	14	35	11	0.8182	0.8182	ENSG00000141279|ENST00000322157	hsa-miR-15b-5p	0	42	48	42	48	9103	7mer-m8	x	7mer-m8	0		0	NPEPPS	protein_coding
ENSG00000169131	hsa-miR-126-5p	ENSG00000169131|ENST00000335815	154	-10.19	2	20	83	106	21	0.6667	0.7619	ENSG00000169131|ENST00000335815	hsa-miR-126-5p	0	40	46	40	46	9115	7mer-m8	x	7mer-m8	0		0	ZNF354A	protein_coding
ENSG00000124812	hsa-miR-192-5p	ENSG00000124812|ENST00000335847	147	-11.94	2	20	722	742	18	0.6111	0.7222	ENSG00000124812|ENST00000335847	hsa-miR-192-5p	0	28	33	28	33	9169	6mer	x	6mer	0		0	CRISP1	protein_coding
ENSG00000124812	hsa-miR-215-5p	ENSG00000124812|ENST00000335847	147	-12.16	2	20	722	742	18	0.6111	0.7222	ENSG00000124812|ENST00000335847	hsa-miR-215-5p	0	28	33	28	33	9170	6mer	x	6mer	0		0	CRISP1	protein_coding
ENSG00000185838	hsa-miR-335-5p	ENSG00000185838|ENST00000329517	160	-14.12	2	21	3146	3168	19	0.7368	0.7368	ENSG00000185838|ENST00000329517	hsa-miR-335-5p	0	27	32	27	32	9194	6mer	x	6mer	0		0	GNB1L	protein_coding
ENSG00000185924	hsa-miR-134-5p	ENSG00000185924|ENST00000331238	154	-23.72	2	20	478	502	21	0.6667	0.7619	ENSG00000185924|ENST00000331238	hsa-miR-134-5p	0	44	49	44	49	9215	6mer	x	6mer	0		0	RTN4RL1	protein_coding
ENSG00000188976	hsa-miR-361-3p	ENSG00000188976|ENST00000327044	158	-26.57	2	19	1	18	17	0.7059	0.8235	ENSG00000188976|ENST00000327044	hsa-miR-361-3p	0	52	59	52	59	9227	8mer-1a	x	8mer-1a	0		0	NOC2L	protein_coding
ENSG00000169435	hsa-miR-126-5p	ENSG00000169435|ENST00000342081	157	-2.41	2	18	1609	1629	16	0.75	0.8125	ENSG00000169435|ENST00000342081	hsa-miR-126-5p	0	21	26	21	26	9228	6mer	x	6mer	0		0	RASSF6	protein_coding
ENSG00000198315	hsa-miR-335-5p	ENSG00000198315|ENST00000330236	145	-13.76	2	10	778	800	8	1	1	ENSG00000198315|ENST00000330236	hsa-miR-335-5p	0	35	40	35	40	9236	6mer	x	6mer	0		0	ZKSCAN8	protein_coding
ENSG00000183454	hsa-miR-30a-3p	ENSG00000183454|ENST00000330684	148	-10.85	2	19	3932	3955	19	0.6316	0.8421	ENSG00000183454|ENST00000330684	hsa-miR-30a-3p	0	17	23	17	23	9245	7mer-1a	x	7mer-1a	0		0	GRIN2A	protein_coding
ENSG00000183454	hsa-miR-30e-3p	ENSG00000183454|ENST00000330684	152	-10.53	2	19	3932	3955	19	0.6842	0.8421	ENSG00000183454|ENST00000330684	hsa-miR-30e-3p	0	17	23	17	23	9246	7mer-1a	x	7mer-1a	0		0	GRIN2A	protein_coding
ENSG00000147121	hsa-miR-7847-3p	ENSG00000147121|ENST00000344302	142	-15.64	2	11	84	104	9	0.8889	0.8889	ENSG00000147121|ENST00000344302	hsa-miR-7847-3p	0	54	59	54	59	9252	6mer	x	6mer	0		0	KRBOX4	protein_coding
ENSG00000198464	hsa-miR-30a-3p	ENSG00000198464|ENST00000335090	159	-16.32	2	21	524	546	20	0.7	0.8	ENSG00000198464|ENST00000335090	hsa-miR-30a-3p	0	35	41	35	41	9255	7mer-1a	x	7mer-1a	0		0	ZNF480	protein_coding
ENSG00000198464	hsa-miR-30e-3p	ENSG00000198464|ENST00000335090	163	-17.11	2	21	524	546	20	0.75	0.8	ENSG00000198464|ENST00000335090	hsa-miR-30e-3p	0	35	41	35	41	9256	7mer-1a	x	7mer-1a	0		0	ZNF480	protein_coding
ENSG00000189221	hsa-miR-30a-3p	ENSG00000189221|ENST00000338702	142	-8.62	2	21	1014	1041	25	0.6	0.68	ENSG00000189221|ENST00000338702	hsa-miR-30a-3p	0	43	48	43	48	9266	6mer	x	6mer	0		0	MAOA	protein_coding
ENSG00000189221	hsa-miR-30e-3p	ENSG00000189221|ENST00000338702	140	-6.65	2	9	1020	1041	7	1	1	ENSG00000189221|ENST00000338702	hsa-miR-30e-3p	0	43	48	43	48	9267	6mer	x	6mer	0		0	MAOA	protein_coding
ENSG00000179832	hsa-miR-432-5p	ENSG00000179832|ENST00000326134	154	-32.34	2	22	32	60	26	0.6538	0.7692	ENSG00000179832|ENST00000326134	hsa-miR-432-5p	0	42	48	42	48	9282	7mer-1a	x	7mer-1a	0		0	MROH1	protein_coding
ENSG00000089472	hsa-miR-146a-5p	ENSG00000089472|ENST00000336279	164	-20.62	2	21	598	619	19	0.7368	0.7895	ENSG00000089472|ENST00000336279	hsa-miR-146a-5p	0	47	52	47	52	9298	6mer	x	6mer	0		0	HEPH	protein_coding
ENSG00000089472	hsa-miR-146b-5p	ENSG00000089472|ENST00000336279	159	-20.07	2	21	596	619	20	0.75	0.75	ENSG00000089472|ENST00000336279	hsa-miR-146b-5p	0	47	52	47	52	9299	6mer	x	6mer	0		0	HEPH	protein_coding
ENSG00000089472	hsa-miR-432-5p	ENSG00000089472|ENST00000336279	144	-18.51	2	18	600	623	17	0.7059	0.7059	ENSG00000089472|ENST00000336279	hsa-miR-432-5p	0	31	37	31	37	9302	7mer-m8	x	7mer-m8	0		0	HEPH	protein_coding
ENSG00000182158	hsa-miR-335-5p	ENSG00000182158|ENST00000330387	151	-15.06	2	16	345	367	14	0.7857	0.7857	ENSG00000182158|ENST00000330387	hsa-miR-335-5p	0	26	31	26	31	9303	6mer	x	6mer	0		0	CREB3L2	protein_coding
ENSG00000111897	hsa-miR-150-5p	ENSG00000111897|ENST00000339697	140	-15.8	2	9	782	803	7	1	1	ENSG00000111897|ENST00000339697	hsa-miR-150-5p	0	39	44	39	44	9313	6mer	x	6mer	0		0	SERINC1	protein_coding
ENSG00000014257	hsa-miR-192-5p	ENSG00000014257|ENST00000336375	149	-9.98	2	18	256	276	16	0.6875	0.75	ENSG00000014257|ENST00000336375	hsa-miR-192-5p	0	19	24	19	24	9316	6mer	x	6mer	0		0	ACP3	protein_coding
ENSG00000014257	hsa-miR-215-5p	ENSG00000014257|ENST00000336375	149	-10.26	2	18	256	276	16	0.6875	0.75	ENSG00000014257|ENST00000336375	hsa-miR-215-5p	0	19	24	19	24	9318	6mer	x	6mer	0		0	ACP3	protein_coding
ENSG00000180219	hsa-miR-23a-3p	ENSG00000180219|ENST00000324341	145	-15.89	2	10	603	623	8	1	1	ENSG00000180219|ENST00000324341	hsa-miR-23a-3p	0	23	29	23	29	9331	7mer-1a	x	7mer-1a	0		0	FAM71C	protein_coding
ENSG00000180219	hsa-miR-23b-3p	ENSG00000180219|ENST00000324341	145	-17.99	2	10	601	623	8	1	1	ENSG00000180219|ENST00000324341	hsa-miR-23b-3p	0	23	29	23	29	9332	7mer-1a	x	7mer-1a	0		0	FAM71C	protein_coding
ENSG00000180219	hsa-miR-23c	ENSG00000180219|ENST00000324341	145	-14.34	2	10	602	623	8	1	1	ENSG00000180219|ENST00000324341	hsa-miR-23c	0	23	29	23	29	9333	7mer-1a	x	7mer-1a	0		0	FAM71C	protein_coding
ENSG00000102053	hsa-miR-664a-5p	ENSG00000102053|ENST00000338957	150	-15.28	2	21	194	216	19	0.6842	0.7368	ENSG00000102053|ENST00000338957	hsa-miR-664a-5p	0	15	20	15	20	9362	6mer	x	6mer	0		0	ZC3H12B	protein_coding
ENSG00000184588	hsa-miR-339-5p	ENSG00000184588|ENST00000329654	155	-25.64	2	12	1151	1173	10	1	1	ENSG00000184588|ENST00000329654	hsa-miR-339-5p	0	16	21	16	21	9382	6mer	x	6mer	0		0	PDE4B	protein_coding
ENSG00000175029	hsa-miR-150-5p	ENSG00000175029|ENST00000337195	144	-14.44	2	21	2690	2708	19	0.6842	0.6842	ENSG00000175029|ENST00000337195	hsa-miR-150-5p	0	27	32	27	32	9389	6mer	x	6mer	0		0	CTBP2	protein_coding
ENSG00000079263	hsa-miR-24-3p	ENSG00000079263|ENST00000343805	140	-16.06	2	9	105	126	7	1	1	ENSG00000079263|ENST00000343805	hsa-miR-24-3p	0	32	37	32	37	9395	6mer	x	6mer	0		0	SP140	protein_coding
ENSG00000173262	hsa-miR-320c	ENSG00000173262|ENST00000340749	145	-15.71	2	10	268	287	8	1	1	ENSG00000173262|ENST00000340749	hsa-miR-320c	0	22	27	22	27	9416	6mer	x	6mer	0		0	SLC2A14	protein_coding
ENSG00000173262	hsa-miR-320d	ENSG00000173262|ENST00000340749	145	-15.71	2	10	269	287	8	1	1	ENSG00000173262|ENST00000340749	hsa-miR-320d	0	22	27	22	27	9417	6mer	x	6mer	0		0	SLC2A14	protein_coding
ENSG00000005801	hsa-miR-625-3p	ENSG00000005801|ENST00000343338	146	-11.62	2	15	1101	1122	13	0.7692	0.7692	ENSG00000005801|ENST00000343338	hsa-miR-625-3p	0	36	41	36	41	9451	6mer	x	6mer	0		0	ZNF195	protein_coding
ENSG00000157551	hsa-miR-432-5p	ENSG00000157551|ENST00000328656	157	-24.1	2	22	5923	5945	20	0.65	0.75	ENSG00000157551|ENST00000328656	hsa-miR-432-5p	0	17	22	17	22	9452	6mer	x	6mer	0		0	KCNJ15	protein_coding
ENSG00000188647	hsa-miR-126-5p	ENSG00000188647|ENST00000340434	158	-7.88	2	20	3912	3933	19	0.7368	0.7895	ENSG00000188647|ENST00000340434	hsa-miR-126-5p	0	48	54	48	54	9479	7mer-m8	x	7mer-m8	0		0	PTAR1	protein_coding
ENSG00000133318	hsa-miR-15a-5p	ENSG00000133318|ENST00000341307	150	-13.87	2	17	1386	1406	15	0.7333	0.8667	ENSG00000133318|ENST00000341307	hsa-miR-15a-5p	0	41	47	41	47	9484	7mer-m8	x	7mer-m8	0		0	RTN3	protein_coding
ENSG00000133318	hsa-miR-15b-5p	ENSG00000133318|ENST00000341307	142	-12.82	2	17	1386	1406	15	0.6667	0.8	ENSG00000133318|ENST00000341307	hsa-miR-15b-5p	0	41	47	41	47	9486	7mer-m8	x	7mer-m8	0		0	RTN3	protein_coding
ENSG00000140403	hsa-miR-181a-5p	ENSG00000140403|ENST00000343789	153	-19.69	2	21	21	49	25	0.72	0.72	ENSG00000140403|ENST00000343789	hsa-miR-181a-5p	0	48	54	48	54	9512	7mer-m8	x	7mer-m8	0		0	DNAJA4	protein_coding
ENSG00000140403	hsa-miR-181b-5p	ENSG00000140403|ENST00000343789	166	-30.41	2	22	21	49	26	0.7692	0.7692	ENSG00000140403|ENST00000343789	hsa-miR-181b-5p	0	48	54	48	54	9513	7mer-m8	x	7mer-m8	0		0	DNAJA4	protein_coding
ENSG00000029364	hsa-miR-146a-5p	ENSG00000029364|ENST00000336643	141	-11.9	2	11	732	754	10	0.9	0.9	ENSG00000029364|ENST00000336643	hsa-miR-146a-5p	0	39	45	39	45	9514	7mer-m8	x	7mer-m8	0		0	SLC39A9	protein_coding
ENSG00000029364	hsa-miR-146b-5p	ENSG00000029364|ENST00000336643	141	-14.24	2	11	731	754	10	0.9	0.9	ENSG00000029364|ENST00000336643	hsa-miR-146b-5p	0	39	45	39	45	9515	7mer-m8	x	7mer-m8	0		0	SLC39A9	protein_coding
ENSG00000168952	hsa-miR-361-3p	ENSG00000168952|ENST00000323944	142	-19.87	2	19	1506	1528	17	0.6471	0.6471	ENSG00000168952|ENST00000323944	hsa-miR-361-3p	0	35	40	35	40	9527	6mer	x	6mer	0		0	STXBP6	protein_coding
ENSG00000148053	hsa-miR-15a-5p	ENSG00000148053|ENST00000323115	147	-12.65	2	20	4538	4559	18	0.6111	0.7222	ENSG00000148053|ENST00000323115	hsa-miR-15a-5p	0	48	54	48	54	9557	7mer-1a	x	7mer-1a	0		0	NTRK2	protein_coding
ENSG00000148053	hsa-miR-15b-5p	ENSG00000148053|ENST00000323115	143	-13.98	2	21	4542	4559	19	0.6316	0.7368	ENSG00000148053|ENST00000323115	hsa-miR-15b-5p	0	48	54	48	54	9558	7mer-1a	x	7mer-1a	0		0	NTRK2	protein_coding
ENSG00000110713	hsa-miR-134-5p	ENSG00000110713|ENST00000324932	151	-19.73	2	20	8	28	19	0.7368	0.7895	ENSG00000110713|ENST00000324932	hsa-miR-134-5p	0	50	57	50	57	9559	8mer-1a	x	8mer-1a	0		0	NUP98	protein_coding
ENSG00000083642	hsa-miR-142-5p	ENSG00000083642|ENST00000315596	152	-7.62	2	13	1188	1208	11	0.9091	0.9091	ENSG00000083642|ENST00000315596	hsa-miR-142-5p	0	40	45	40	45	9574	6mer	x	6mer	0		0	PDS5B	protein_coding
ENSG00000188269	hsa-miR-25-3p	ENSG00000188269|ENST00000322301	151	-19.04	2	12	576	597	10	0.9	1	ENSG00000188269|ENST00000322301	hsa-miR-25-3p	0	21	28	21	28	9632	8mer-1a	x	8mer-1a	0		0	OR7A5	protein_coding
ENSG00000188269	hsa-miR-92a-3p	ENSG00000188269|ENST00000322301	151	-16.21	2	12	576	597	10	0.9	1	ENSG00000188269|ENST00000322301	hsa-miR-92a-3p	0	21	28	21	28	9634	8mer-1a	x	8mer-1a	0		0	OR7A5	protein_coding
ENSG00000184867	hsa-miR-15a-5p	ENSG00000184867|ENST00000328766	157	-14.92	2	19	233	255	18	0.7222	0.8333	ENSG00000184867|ENST00000328766	hsa-miR-15a-5p	0	27	32	27	32	9643	6mer	x	6mer	0		0	ARMCX2	protein_coding
ENSG00000184867	hsa-miR-15b-5p	ENSG00000184867|ENST00000328766	157	-16.83	2	19	233	255	18	0.7222	0.8333	ENSG00000184867|ENST00000328766	hsa-miR-15b-5p	0	27	32	27	32	9644	6mer	x	6mer	0		0	ARMCX2	protein_coding
ENSG00000187398	hsa-miR-30a-5p	ENSG00000187398|ENST00000336930	140	-7.12	2	9	3808	3829	7	1	1	ENSG00000187398|ENST00000336930	hsa-miR-30a-5p	0	45	50	45	50	9645	6mer	x	6mer	0		0	LUZP2	protein_coding
ENSG00000187398	hsa-miR-30b-5p	ENSG00000187398|ENST00000336930	140	-5.49	2	9	3808	3829	7	1	1	ENSG00000187398|ENST00000336930	hsa-miR-30b-5p	0	45	50	45	50	9646	6mer	x	6mer	0		0	LUZP2	protein_coding
ENSG00000187398	hsa-miR-30c-5p	ENSG00000187398|ENST00000336930	140	-5.7	2	9	3807	3829	7	1	1	ENSG00000187398|ENST00000336930	hsa-miR-30c-5p	0	45	50	45	50	9647	6mer	x	6mer	0		0	LUZP2	protein_coding
ENSG00000187398	hsa-miR-30d-5p	ENSG00000187398|ENST00000336930	140	-6.78	2	9	3808	3829	7	1	1	ENSG00000187398|ENST00000336930	hsa-miR-30d-5p	0	45	50	45	50	9648	6mer	x	6mer	0		0	LUZP2	protein_coding
ENSG00000129993	hsa-miR-27a-3p	ENSG00000129993|ENST00000327483	140	-12.01	2	9	1197	1217	7	1	1	ENSG00000129993|ENST00000327483	hsa-miR-27a-3p	0	22	28	22	28	9676	7mer-1a	x	7mer-1a	0		0	CBFA2T3	protein_coding
ENSG00000129993	hsa-miR-27b-3p	ENSG00000129993|ENST00000327483	140	-10.85	2	9	1197	1217	7	1	1	ENSG00000129993|ENST00000327483	hsa-miR-27b-3p	0	22	28	22	28	9677	7mer-1a	x	7mer-1a	0		0	CBFA2T3	protein_coding
ENSG00000185149	hsa-miR-148a-3p	ENSG00000185149|ENST00000329476	166	-20.08	2	19	1564	1585	17	0.7647	0.8824	ENSG00000185149|ENST00000329476	hsa-miR-148a-3p	0	24	30	24	30	9679	7mer-m8	x	7mer-m8	0		0	NPY2R	protein_coding
ENSG00000185149	hsa-miR-148b-3p	ENSG00000185149|ENST00000329476	154	-16.06	2	19	1564	1585	17	0.6471	0.8235	ENSG00000185149|ENST00000329476	hsa-miR-148b-3p	0	24	30	24	30	9680	7mer-m8	x	7mer-m8	0		0	NPY2R	protein_coding
ENSG00000197779	hsa-miR-181a-5p	ENSG00000197779|ENST00000338637	142	-9.92	2	11	3325	3347	9	0.8889	0.8889	ENSG00000197779|ENST00000338637	hsa-miR-181a-5p	0	54	59	54	59	9694	6mer	x	6mer	0		0	ZNF81	protein_coding
ENSG00000197779	hsa-miR-181b-5p	ENSG00000197779|ENST00000338637	140	-9.36	2	9	3325	3347	7	1	1	ENSG00000197779|ENST00000338637	hsa-miR-181b-5p	0	54	59	54	59	9695	6mer	x	6mer	0		0	ZNF81	protein_coding
ENSG00000145824	hsa-miR-150-5p	ENSG00000145824|ENST00000337225	145	-17	2	10	22	43	8	1	1	ENSG00000145824|ENST00000337225	hsa-miR-150-5p	0	39	44	39	44	9708	6mer	x	6mer	0		0	CXCL14	protein_coding
ENSG00000166405	hsa-miR-128-3p	ENSG00000166405|ENST00000343202	150	-14.09	2	11	80	100	9	1	1	ENSG00000166405|ENST00000343202	hsa-miR-128-3p	0	44	49	44	49	9715	6mer	x	6mer	0		0	RIC3	protein_coding
ENSG00000171435	hsa-miR-432-5p	ENSG00000171435|ENST00000339824	156	-20.43	2	18	5464	5489	19	0.7368	0.7895	ENSG00000171435|ENST00000339824	hsa-miR-432-5p	0	48	53	48	53	9722	6mer	x	6mer	0		0	KSR2	protein_coding
ENSG00000145113	hsa-miR-7847-3p	ENSG00000145113|ENST00000339251	159	-27.11	2	20	1134	1154	18	0.7222	0.7778	ENSG00000145113|ENST00000339251	hsa-miR-7847-3p	0	15	21	15	21	9750	7mer-1a	x	7mer-1a	0		0	MUC4	protein_coding
ENSG00000243130	hsa-miR-181a-5p	ENSG00000243130|ENST00000320078	150	-14.9	2	21	243	264	19	0.5789	0.8421	ENSG00000243130|ENST00000320078	hsa-miR-181a-5p	0	45	51	45	51	9751	7mer-m8	x	7mer-m8	0		0	PSG11	protein_coding
ENSG00000243130	hsa-miR-181b-5p	ENSG00000243130|ENST00000320078	142	-14.36	2	21	243	264	19	0.5263	0.7895	ENSG00000243130|ENST00000320078	hsa-miR-181b-5p	0	45	51	45	51	9752	7mer-m8	x	7mer-m8	0		0	PSG11	protein_coding
ENSG00000105784	hsa-miR-30a-3p	ENSG00000105784|ENST00000338056	146	-8.42	2	15	1119	1140	13	0.7692	0.7692	ENSG00000105784|ENST00000338056	hsa-miR-30a-3p	0	40	46	40	46	9755	7mer-1a	x	7mer-1a	0		0	RUNDC3B	protein_coding
ENSG00000105784	hsa-miR-30e-3p	ENSG00000105784|ENST00000338056	149	-9.68	2	19	1114	1140	22	0.6818	0.6818	ENSG00000105784|ENST00000338056	hsa-miR-30e-3p	0	40	46	40	46	9756	7mer-1a	x	7mer-1a	0		0	RUNDC3B	protein_coding
ENSG00000043514	hsa-miR-29a-3p	ENSG00000043514|ENST00000316891	146	-13.02	2	21	2152	2175	21	0.6667	0.7143	ENSG00000043514|ENST00000316891	hsa-miR-29a-3p	0	37	42	37	42	9759	6mer	x	6mer	0		0	TRIT1	protein_coding
ENSG00000043514	hsa-miR-29b-3p	ENSG00000043514|ENST00000316891	151	-16.79	2	22	2151	2175	22	0.6818	0.7273	ENSG00000043514|ENST00000316891	hsa-miR-29b-3p	0	37	42	37	42	9760	6mer	x	6mer	0		0	TRIT1	protein_coding
ENSG00000043514	hsa-miR-29c-3p	ENSG00000043514|ENST00000316891	142	-12.6	2	21	2152	2175	21	0.619	0.7143	ENSG00000043514|ENST00000316891	hsa-miR-29c-3p	0	37	42	37	42	9761	6mer	x	6mer	0		0	TRIT1	protein_coding
ENSG00000152767	hsa-miR-425-5p	ENSG00000152767|ENST00000319562	141	-13.74	2	10	806	828	8	0.875	1	ENSG00000152767|ENST00000319562	hsa-miR-425-5p	0	51	56	51	56	9767	6mer	x	6mer	0		0	FARP1	protein_coding
ENSG00000164938	hsa-miR-23a-3p	ENSG00000164938|ENST00000342697	145	-11.34	2	10	631	651	8	1	1	ENSG00000164938|ENST00000342697	hsa-miR-23a-3p	0	35	40	35	40	9771	6mer	x	6mer	0		0	TP53INP1	protein_coding
ENSG00000164938	hsa-miR-23b-3p	ENSG00000164938|ENST00000342697	155	-15.97	2	21	633	651	19	0.7368	0.7895	ENSG00000164938|ENST00000342697	hsa-miR-23b-3p	0	35	40	35	40	9772	6mer	x	6mer	0		0	TP53INP1	protein_coding
ENSG00000164938	hsa-miR-23c	ENSG00000164938|ENST00000342697	154	-12.17	2	21	631	651	19	0.6842	0.7895	ENSG00000164938|ENST00000342697	hsa-miR-23c	0	35	40	35	40	9773	6mer	x	6mer	0		0	TP53INP1	protein_coding
ENSG00000152430	hsa-miR-21-5p	ENSG00000152430|ENST00000321801	144	-10.61	2	19	136	156	17	0.6471	0.7647	ENSG00000152430|ENST00000321801	hsa-miR-21-5p	0	47	53	47	53	9777	7mer-m8	x	7mer-m8	0		0	BOLL	protein_coding
ENSG00000181027	hsa-miR-128-3p	ENSG00000181027|ENST00000318584	145	-19.92	2	14	560	580	12	0.75	0.8333	ENSG00000181027|ENST00000318584	hsa-miR-128-3p	0	35	41	35	41	9782	7mer-m8	x	7mer-m8	0		0	FKRP	protein_coding
ENSG00000176619	hsa-miR-30a-3p	ENSG00000176619|ENST00000325327	146	-11.81	2	21	29	49	19	0.6842	0.6842	ENSG00000176619|ENST00000325327	hsa-miR-30a-3p	0	22	28	22	28	9791	7mer-m8	x	7mer-m8	0		0	LMNB2	protein_coding
ENSG00000176619	hsa-miR-30e-3p	ENSG00000176619|ENST00000325327	145	-10.41	2	16	29	49	14	0.7857	0.7857	ENSG00000176619|ENST00000325327	hsa-miR-30e-3p	0	22	28	22	28	9792	7mer-m8	x	7mer-m8	0		0	LMNB2	protein_coding
ENSG00000186197	hsa-miR-146a-5p	ENSG00000186197|ENST00000334232	152	-19.46	2	20	967	988	19	0.7368	0.7895	ENSG00000186197|ENST00000334232	hsa-miR-146a-5p	0	19	24	19	24	9799	6mer	x	6mer	0		0	EDARADD	protein_coding
ENSG00000186197	hsa-miR-146b-5p	ENSG00000186197|ENST00000334232	148	-19.29	2	14	965	988	13	0.8462	0.8462	ENSG00000186197|ENST00000334232	hsa-miR-146b-5p	0	19	24	19	24	9800	6mer	x	6mer	0		0	EDARADD	protein_coding
ENSG00000114030	hsa-miR-29a-3p	ENSG00000114030|ENST00000344337	148	-16.89	2	15	4565	4585	13	0.8462	0.8462	ENSG00000114030|ENST00000344337	hsa-miR-29a-3p	0	29	34	29	34	9803	6mer	x	6mer	0		0	KPNA1	protein_coding
ENSG00000114030	hsa-miR-29b-3p	ENSG00000114030|ENST00000344337	145	-14.83	2	22	4563	4585	20	0.55	0.7	ENSG00000114030|ENST00000344337	hsa-miR-29b-3p	0	29	34	29	34	9804	6mer	x	6mer	0		0	KPNA1	protein_coding
ENSG00000114030	hsa-miR-29c-3p	ENSG00000114030|ENST00000344337	144	-17.02	2	15	4565	4585	13	0.7692	0.8462	ENSG00000114030|ENST00000344337	hsa-miR-29c-3p	0	29	34	29	34	9805	6mer	x	6mer	0		0	KPNA1	protein_coding
ENSG00000073067	hsa-miR-24-3p	ENSG00000073067|ENST00000340150	143	-18.22	2	21	796	815	20	0.7	0.7	ENSG00000073067|ENST00000340150	hsa-miR-24-3p	0	45	52	45	52	9808	8mer-1a	x	8mer-1a	0		0	CYP2W1	protein_coding
ENSG00000109654	hsa-miR-142-5p	ENSG00000109654|ENST00000338700	162	-9.92	2	19	3547	3567	17	0.7647	0.8235	ENSG00000109654|ENST00000338700	hsa-miR-142-5p	0	29	34	29	34	9848	6mer	x	6mer	0		0	TRIM2	protein_coding
ENSG00000134138	hsa-miR-199a-5p	ENSG00000134138|ENST00000340545	140	-12.32	2	9	779	801	7	1	1	ENSG00000134138|ENST00000340545	hsa-miR-199a-5p	0	35	41	35	41	9867	7mer-m8	x	7mer-m8	0		0	MEIS2	protein_coding
ENSG00000148484	hsa-miR-150-5p	ENSG00000148484|ENST00000345264	140	-15.81	2	9	2207	2228	7	1	1	ENSG00000148484|ENST00000345264	hsa-miR-150-5p	0	17	23	17	23	9894	7mer-1a	x	7mer-1a	0		0	RSU1	protein_coding
ENSG00000144061	hsa-miR-584-5p	ENSG00000144061|ENST00000316534	145	-9.87	2	10	163	184	8	1	1	ENSG00000144061|ENST00000316534	hsa-miR-584-5p	0	35	40	35	40	9904	6mer	x	6mer	0		0	NPHP1	protein_coding
ENSG00000198393	hsa-miR-26a-5p	ENSG00000198393|ENST00000328654	148	-17.25	2	14	5920	5942	13	0.8462	0.8462	ENSG00000198393|ENST00000328654	hsa-miR-26a-5p	0	42	48	42	48	9910	7mer-1a	x	7mer-1a	0		0	ZNF26	protein_coding
ENSG00000119723	hsa-miR-664a-5p	ENSG00000119723|ENST00000334571	141	-14.76	2	10	174	197	8	0.875	1	ENSG00000119723|ENST00000334571	hsa-miR-664a-5p	0	16	21	16	21	9948	6mer	x	6mer	0		0	COQ6	protein_coding
ENSG00000017427	hsa-miR-128-3p	ENSG00000017427|ENST00000337514	141	-15.11	2	20	1216	1235	18	0.6111	0.7222	ENSG00000017427|ENST00000337514	hsa-miR-128-3p	0	49	55	49	55	9956	7mer-m8	x	7mer-m8	0		0	IGF1	protein_coding
ENSG00000221866	hsa-miR-24-3p	ENSG00000221866|ENST00000321063	160	-24.22	2	18	399	422	18	0.7778	0.8333	ENSG00000221866|ENST00000321063	hsa-miR-24-3p	0	39	44	39	44	9978	6mer	x	6mer	0		0	PLXNA4	protein_coding
ENSG00000180263	hsa-miR-150-5p	ENSG00000180263|ENST00000343958	140	-14.73	2	9	1293	1314	7	1	1	ENSG00000180263|ENST00000343958	hsa-miR-150-5p	0	38	44	38	44	9980	7mer-m8	x	7mer-m8	0		0	FGD6	protein_coding
ENSG00000186073	hsa-miR-142-5p	ENSG00000186073|ENST00000338183	140	-5.61	2	9	1593	1613	7	1	1	ENSG00000186073|ENST00000338183	hsa-miR-142-5p	0	15	21	15	21	9991	7mer-1a	x	7mer-1a	0		0	CDIN1	protein_coding
ENSG00000185811	hsa-miR-28-3p	ENSG00000185811|ENST00000331340	144	-14.36	2	17	962	981	15	0.7333	0.8667	ENSG00000185811|ENST00000331340	hsa-miR-28-3p	0	37	42	37	42	9999	6mer	x	6mer	0		0	IKZF1	protein_coding
ENSG00000088899	hsa-miR-24-3p	ENSG00000088899|ENST00000329152	144	-21.03	2	18	1045	1068	18	0.6667	0.7222	ENSG00000088899|ENST00000329152	hsa-miR-24-3p	0	43	48	43	48	10010	6mer	x	6mer	0		0	LZTS3	protein_coding
ENSG00000115053	hsa-miR-26a-5p	ENSG00000115053|ENST00000322723	154	-13.72	2	20	1239	1261	19	0.6842	0.7895	ENSG00000115053|ENST00000322723	hsa-miR-26a-5p	0	38	43	38	43	10030	6mer	x	6mer	0		0	NCL	protein_coding
ENSG00000103313	hsa-miR-664a-5p	ENSG00000103313|ENST00000339854	141	-14.73	2	10	642	665	8	0.875	1	ENSG00000103313|ENST00000339854	hsa-miR-664a-5p	0	22	28	22	28	10038	7mer-m8	x	7mer-m8	0		0	MEFV	protein_coding
ENSG00000188766	hsa-miR-339-5p	ENSG00000188766|ENST00000338502	147	-20.22	2	22	2262	2286	22	0.6364	0.7273	ENSG00000188766|ENST00000338502	hsa-miR-339-5p	0	53	59	53	59	10061	7mer-m8	x	7mer-m8	0		0	SPRED3	protein_coding
ENSG00000214517	hsa-miR-128-3p	ENSG00000214517|ENST00000328257	142	-16.26	2	19	954	971	17	0.7059	0.7059	ENSG00000214517|ENST00000328257	hsa-miR-128-3p	0	25	30	25	30	10086	6mer	x	6mer	0		0	PPME1	protein_coding
ENSG00000140505	hsa-miR-7847-3p	ENSG00000140505|ENST00000343932	148	-22.2	2	20	424	448	22	0.7273	0.7273	ENSG00000140505|ENST00000343932	hsa-miR-7847-3p	0	38	43	38	43	10089	6mer	x	6mer	0		0	CYP1A2	protein_coding
ENSG00000158792	hsa-miR-15a-5p	ENSG00000158792|ENST00000335360	146	-13.57	2	21	138	158	19	0.6316	0.7368	ENSG00000158792|ENST00000335360	hsa-miR-15a-5p	0	20	25	20	25	10104	6mer	x	6mer	0		0	SPATA2L	protein_coding
ENSG00000158792	hsa-miR-15b-5p	ENSG00000158792|ENST00000335360	144	-14.77	2	19	138	158	17	0.6471	0.7647	ENSG00000158792|ENST00000335360	hsa-miR-15b-5p	0	20	25	20	25	10105	6mer	x	6mer	0		0	SPATA2L	protein_coding
ENSG00000248905	hsa-miR-29a-3p	ENSG00000248905|ENST00000334528	153	-17.09	2	16	7908	7928	14	0.8571	0.8571	ENSG00000248905|ENST00000334528	hsa-miR-29a-3p	0	21	26	21	26	10142	6mer	x	6mer	0		0	FMN1	protein_coding
ENSG00000248905	hsa-miR-29b-3p	ENSG00000248905|ENST00000334528	152	-16.16	2	21	7906	7928	19	0.6316	0.7368	ENSG00000248905|ENST00000334528	hsa-miR-29b-3p	0	21	26	21	26	10143	6mer	x	6mer	0		0	FMN1	protein_coding
ENSG00000248905	hsa-miR-29c-3p	ENSG00000248905|ENST00000334528	149	-17.22	2	16	7908	7928	14	0.7857	0.8571	ENSG00000248905|ENST00000334528	hsa-miR-29c-3p	0	21	26	21	26	10144	6mer	x	6mer	0		0	FMN1	protein_coding
ENSG00000153157	hsa-miR-339-5p	ENSG00000153157|ENST00000341041	147	-19.26	2	12	439	461	10	0.9	0.9	ENSG00000153157|ENST00000341041	hsa-miR-339-5p	0	40	46	40	46	10167	7mer-m8	x	7mer-m8	0		0	SYCP2L	protein_coding
ENSG00000153157	hsa-miR-361-3p	ENSG00000153157|ENST00000341041	143	-21.76	2	21	1527	1546	19	0.6316	0.7895	ENSG00000153157|ENST00000341041	hsa-miR-361-3p	0	50	55	50	55	10168	6mer	x	6mer	0		0	SYCP2L	protein_coding
ENSG00000172888	hsa-miR-146a-5p	ENSG00000172888|ENST00000339296	150	-19.18	2	11	1953	1974	9	1	1	ENSG00000172888|ENST00000339296	hsa-miR-146a-5p	0	19	24	19	24	10175	6mer	x	6mer	0		0	ZNF621	protein_coding
ENSG00000172888	hsa-miR-146b-5p	ENSG00000172888|ENST00000339296	150	-17.85	2	11	1952	1974	9	1	1	ENSG00000172888|ENST00000339296	hsa-miR-146b-5p	0	19	24	19	24	10176	6mer	x	6mer	0		0	ZNF621	protein_coding
ENSG00000261509	hsa-miR-15a-5p	ENSG00000261509|ENST00000341305	147	-12.03	2	20	306	327	18	0.6111	0.7222	ENSG00000261509|ENST00000341305	hsa-miR-15a-5p	0	34	39	34	39	10177	6mer	x	6mer	0		0	TP53TG3B	protein_coding
ENSG00000261509	hsa-miR-15b-5p	ENSG00000261509|ENST00000341305	149	-14.44	2	20	307	327	18	0.6667	0.7778	ENSG00000261509|ENST00000341305	hsa-miR-15b-5p	0	34	39	34	39	10178	6mer	x	6mer	0		0	TP53TG3B	protein_coding
ENSG00000099364	hsa-miR-30a-3p	ENSG00000099364|ENST00000338343	155	-12.86	2	19	646	665	17	0.7059	0.8824	ENSG00000099364|ENST00000338343	hsa-miR-30a-3p	0	32	37	32	37	10253	6mer	x	6mer	0		0	FBXL19	protein_coding
ENSG00000099364	hsa-miR-30e-3p	ENSG00000099364|ENST00000338343	159	-15.18	2	19	646	665	17	0.7647	0.8824	ENSG00000099364|ENST00000338343	hsa-miR-30e-3p	0	32	37	32	37	10254	6mer	x	6mer	0		0	FBXL19	protein_coding
ENSG00000058063	hsa-miR-21-5p	ENSG00000058063|ENST00000323116	146	-10.63	2	13	1055	1075	11	0.9091	0.9091	ENSG00000058063|ENST00000323116	hsa-miR-21-5p	0	29	35	29	35	10271	7mer-1a	x	7mer-1a	0		0	ATP11B	protein_coding
ENSG00000083896	hsa-miR-128-3p	ENSG00000083896|ENST00000344157	147	-16.55	2	20	2556	2576	18	0.6111	0.7222	ENSG00000083896|ENST00000344157	hsa-miR-128-3p	0	54	60	54	60	10280	7mer-1a	x	7mer-1a	0		0	YTHDC1	protein_coding
ENSG00000083896	hsa-miR-27a-3p	ENSG00000083896|ENST00000344157	160	-21.7	2	18	2556	2577	17	0.7647	0.8824	ENSG00000083896|ENST00000344157	hsa-miR-27a-3p	0	54	60	54	60	10281	7mer-m8	x	7mer-m8	0		0	YTHDC1	protein_coding
ENSG00000083896	hsa-miR-27b-3p	ENSG00000083896|ENST00000344157	162	-24.26	2	20	2556	2577	19	0.7368	0.8421	ENSG00000083896|ENST00000344157	hsa-miR-27b-3p	0	54	60	54	60	10282	7mer-m8	x	7mer-m8	0		0	YTHDC1	protein_coding
ENSG00000182831	hsa-miR-142-5p	ENSG00000182831|ENST00000327827	170	-16.39	2	19	3162	3182	17	0.8235	0.8824	ENSG00000182831|ENST00000327827	hsa-miR-142-5p	0	29	34	29	34	10300	6mer	x	6mer	0		0	C16orf72	protein_coding
ENSG00000175130	hsa-miR-24-3p	ENSG00000175130|ENST00000329421	140	-16.19	2	9	351	372	7	1	1	ENSG00000175130|ENST00000329421	hsa-miR-24-3p	0	27	33	27	33	10338	7mer-m8	x	7mer-m8	0		0	MARCKSL1	protein_coding
ENSG00000140600	hsa-miR-30a-3p	ENSG00000140600|ENST00000324537	157	-13.1	2	19	18	41	19	0.7368	0.7895	ENSG00000140600|ENST00000324537	hsa-miR-30a-3p	0	45	50	45	50	10347	6mer	x	6mer	0		0	SH3GL3	protein_coding
ENSG00000140600	hsa-miR-30e-3p	ENSG00000140600|ENST00000324537	152	-12.52	2	18	18	41	18	0.7222	0.7778	ENSG00000140600|ENST00000324537	hsa-miR-30e-3p	0	45	50	45	50	10348	6mer	x	6mer	0		0	SH3GL3	protein_coding
ENSG00000148841	hsa-miR-361-3p	ENSG00000148841|ENST00000337478	165	-29.68	2	22	3451	3473	20	0.7	0.8	ENSG00000148841|ENST00000337478	hsa-miR-361-3p	0	45	50	45	50	10364	6mer	x	6mer	0		0	ITPRIP	protein_coding
ENSG00000111846	hsa-miR-199a-3p	ENSG00000111846|ENST00000316170	148	-15.59	2	18	2668	2691	18	0.7222	0.7222	ENSG00000111846|ENST00000316170	hsa-miR-199a-3p	0	25	30	25	30	10365	6mer	x	6mer	0		0	GCNT2	protein_coding
ENSG00000111846	hsa-miR-199b-3p	ENSG00000111846|ENST00000316170	148	-15.59	2	18	2668	2691	18	0.7222	0.7222	ENSG00000111846|ENST00000316170	hsa-miR-199b-3p	0	25	30	25	30	10366	6mer	x	6mer	0		0	GCNT2	protein_coding
ENSG00000177663	hsa-miR-7847-3p	ENSG00000177663|ENST00000319363	166	-24.45	2	19	4435	4455	17	0.7647	0.8824	ENSG00000177663|ENST00000319363	hsa-miR-7847-3p	0	31	37	31	37	10371	7mer-m8	x	7mer-m8	0		0	IL17RA	protein_coding
ENSG00000060982	hsa-miR-150-5p	ENSG00000060982|ENST00000342945	142	-17.51	2	20	1917	1939	19	0.6316	0.6842	ENSG00000060982|ENST00000342945	hsa-miR-150-5p	0	33	40	33	40	10392	8mer-1a	x	8mer-1a	0		0	BCAT1	protein_coding
ENSG00000125779	hsa-miR-151a-3p	ENSG00000125779|ENST00000336066	160	-20.62	2	20	873	891	18	0.7778	0.8333	ENSG00000125779|ENST00000336066	hsa-miR-151a-3p	0	35	40	35	40	10393	6mer	x	6mer	0		0	PANK2	protein_coding
ENSG00000177889	hsa-miR-142-5p	ENSG00000177889|ENST00000318066	146	-8.25	2	12	467	488	11	0.9091	0.9091	ENSG00000177889|ENST00000318066	hsa-miR-142-5p	0	15	20	15	20	10397	6mer	x	6mer	0		0	UBE2N	protein_coding
ENSG00000134352	hsa-miR-425-5p	ENSG00000134352|ENST00000336909	147	-8.81	2	12	2010	2032	10	0.9	0.9	ENSG00000134352|ENST00000336909	hsa-miR-425-5p	0	35	40	35	40	10399	6mer	x	6mer	0		0	IL6ST	protein_coding
ENSG00000109332	hsa-miR-23a-3p	ENSG00000109332|ENST00000343106	141	-10.51	2	14	574	594	12	0.75	0.75	ENSG00000109332|ENST00000343106	hsa-miR-23a-3p	0	53	58	53	58	10424	6mer	x	6mer	0		0	UBE2D3	protein_coding
ENSG00000109332	hsa-miR-23b-3p	ENSG00000109332|ENST00000343106	141	-10.9	2	14	572	594	12	0.75	0.75	ENSG00000109332|ENST00000343106	hsa-miR-23b-3p	0	53	58	53	58	10425	6mer	x	6mer	0		0	UBE2D3	protein_coding
ENSG00000109332	hsa-miR-23c	ENSG00000109332|ENST00000343106	146	-9.52	2	15	573	594	13	0.7692	0.7692	ENSG00000109332|ENST00000343106	hsa-miR-23c	0	53	58	53	58	10426	6mer	x	6mer	0		0	UBE2D3	protein_coding
ENSG00000177427	hsa-miR-126-5p	ENSG00000177427|ENST00000323019	165	-8.15	2	18	1766	1786	16	0.8125	0.875	ENSG00000177427|ENST00000323019	hsa-miR-126-5p	0	33	39	33	39	10432	7mer-m8	x	7mer-m8	0		0	MIEF2	protein_coding
ENSG00000140015	hsa-miR-382-5p	ENSG00000140015|ENST00000322893	163	-13.51	2	20	3272	3293	18	0.6667	0.8889	ENSG00000140015|ENST00000322893	hsa-miR-382-5p	0	16	22	16	22	10475	7mer-m8	x	7mer-m8	0		0	KCNH5	protein_coding
ENSG00000124225	hsa-miR-584-5p	ENSG00000124225|ENST00000341744	150	-17.93	2	20	3234	3253	19	0.7368	0.7895	ENSG00000124225|ENST00000341744	hsa-miR-584-5p	0	16	22	16	22	10478	7mer-1a	x	7mer-1a	0		0	PMEPA1	protein_coding
ENSG00000120798	hsa-miR-27a-3p	ENSG00000120798|ENST00000333003	140	-9.46	2	9	1	10	7	1	1	ENSG00000120798|ENST00000333003	hsa-miR-27a-3p	0	27	34	27	34	10483	8mer-1a	x	8mer-1a	0		0	NR2C1	protein_coding
ENSG00000120798	hsa-miR-27b-3p	ENSG00000120798|ENST00000333003	140	-8.72	2	9	1	10	7	1	1	ENSG00000120798|ENST00000333003	hsa-miR-27b-3p	0	27	34	27	34	10484	8mer-1a	x	8mer-1a	0		0	NR2C1	protein_coding
ENSG00000077274	hsa-miR-15a-5p	ENSG00000077274|ENST00000324068	155	-17.68	2	20	947	968	18	0.7222	0.7222	ENSG00000077274|ENST00000324068	hsa-miR-15a-5p	0	49	54	49	54	10503	6mer	x	6mer	0		0	CAPN6	protein_coding
ENSG00000077274	hsa-miR-15b-5p	ENSG00000077274|ENST00000324068	148	-18.36	2	20	947	968	19	0.7368	0.7368	ENSG00000077274|ENST00000324068	hsa-miR-15b-5p	0	49	54	49	54	10504	6mer	x	6mer	0		0	CAPN6	protein_coding
ENSG00000187268	hsa-miR-181a-5p	ENSG00000187268|ENST00000333995	154	-12.84	2	21	148	169	19	0.6842	0.7895	ENSG00000187268|ENST00000333995	hsa-miR-181a-5p	0	18	23	18	23	10510	6mer	x	6mer	0		0	FAM9C	protein_coding
ENSG00000187268	hsa-miR-181b-5p	ENSG00000187268|ENST00000333995	151	-16.01	2	22	148	169	20	0.65	0.75	ENSG00000187268|ENST00000333995	hsa-miR-181b-5p	0	18	23	18	23	10511	6mer	x	6mer	0		0	FAM9C	protein_coding
ENSG00000155816	hsa-miR-25-3p	ENSG00000155816|ENST00000319653	153	-16.19	2	21	924	943	19	0.6842	0.7895	ENSG00000155816|ENST00000319653	hsa-miR-25-3p	0	18	24	18	24	10512	7mer-1a	x	7mer-1a	0		0	FMN2	protein_coding
ENSG00000155816	hsa-miR-92a-3p	ENSG00000155816|ENST00000319653	145	-14.66	2	14	922	943	12	0.75	0.8333	ENSG00000155816|ENST00000319653	hsa-miR-92a-3p	0	18	24	18	24	10513	7mer-1a	x	7mer-1a	0		0	FMN2	protein_coding
ENSG00000182318	hsa-miR-425-5p	ENSG00000182318|ENST00000329665	142	-11.13	2	11	1924	1946	9	0.8889	0.8889	ENSG00000182318|ENST00000329665	hsa-miR-425-5p	0	16	21	16	21	10514	6mer	x	6mer	0		0	ZSCAN22	protein_coding
ENSG00000097007	hsa-miR-15a-5p	ENSG00000097007|ENST00000318560	144	-16.95	2	21	552	573	19	0.5789	0.6842	ENSG00000097007|ENST00000318560	hsa-miR-15a-5p	0	48	54	48	54	10531	7mer-m8	x	7mer-m8	0		0	ABL1	protein_coding
ENSG00000097007	hsa-miR-15b-5p	ENSG00000097007|ENST00000318560	144	-13.43	2	18	550	573	18	0.6667	0.7222	ENSG00000097007|ENST00000318560	hsa-miR-15b-5p	0	48	54	48	54	10532	7mer-m8	x	7mer-m8	0		0	ABL1	protein_coding
ENSG00000141084	hsa-miR-150-5p	ENSG00000141084|ENST00000317506	146	-15	2	19	1251	1272	17	0.6471	0.7059	ENSG00000141084|ENST00000317506	hsa-miR-150-5p	0	46	52	46	52	10543	7mer-1a	x	7mer-1a	0		0	RANBP10	protein_coding
ENSG00000086300	hsa-miR-126-5p	ENSG00000086300|ENST00000338523	140	-4.77	2	9	55	75	7	1	1	ENSG00000086300|ENST00000338523	hsa-miR-126-5p	0	54	59	54	59	10567	6mer	x	6mer	0		0	SNX10	protein_coding
ENSG00000171634	hsa-miR-320c	ENSG00000171634|ENST00000342579	143	-8.88	2	12	1398	1417	10	0.8	0.9	ENSG00000171634|ENST00000342579	hsa-miR-320c	0	47	52	47	52	10572	6mer	x	6mer	0		0	BPTF	protein_coding
ENSG00000171634	hsa-miR-320d	ENSG00000171634|ENST00000342579	143	-8.88	2	12	1399	1417	10	0.8	0.9	ENSG00000171634|ENST00000342579	hsa-miR-320d	0	47	52	47	52	10573	6mer	x	6mer	0		0	BPTF	protein_coding
ENSG00000188322	hsa-miR-30a-5p	ENSG00000188322|ENST00000341901	159	-14.78	2	20	2306	2327	18	0.6667	0.8333	ENSG00000188322|ENST00000341901	hsa-miR-30a-5p	0	48	55	48	55	10575	8mer-1a	x	8mer-1a	0		0	SBK1	protein_coding
ENSG00000188322	hsa-miR-30b-5p	ENSG00000188322|ENST00000341901	151	-14.49	2	20	2306	2327	18	0.6667	0.7222	ENSG00000188322|ENST00000341901	hsa-miR-30b-5p	0	48	55	48	55	10576	8mer-1a	x	8mer-1a	0		0	SBK1	protein_coding
ENSG00000188322	hsa-miR-30c-5p	ENSG00000188322|ENST00000341901	154	-20.78	2	21	2298	2327	26	0.6923	0.6923	ENSG00000188322|ENST00000341901	hsa-miR-30c-5p	0	48	55	48	55	10577	8mer-1a	x	8mer-1a	0		0	SBK1	protein_coding
ENSG00000188322	hsa-miR-30d-5p	ENSG00000188322|ENST00000341901	159	-15.28	2	20	2306	2327	18	0.6667	0.8333	ENSG00000188322|ENST00000341901	hsa-miR-30d-5p	0	48	55	48	55	10578	8mer-1a	x	8mer-1a	0		0	SBK1	protein_coding
ENSG00000184076	hsa-miR-361-3p	ENSG00000184076|ENST00000330029	153	-21.41	2	22	470	492	20	0.6	0.75	ENSG00000184076|ENST00000330029	hsa-miR-361-3p	0	31	37	31	37	10584	7mer-m8	x	7mer-m8	0		0	UQCR10	protein_coding
ENSG00000136153	hsa-miR-30a-3p	ENSG00000136153|ENST00000341547	150	-11.45	2	21	933	953	19	0.5789	0.8421	ENSG00000136153|ENST00000341547	hsa-miR-30a-3p	0	26	32	26	32	10585	7mer-1a	x	7mer-1a	0		0	LMO7	protein_coding
ENSG00000136153	hsa-miR-30a-5p	ENSG00000136153|ENST00000341547	157	-18.8	2	19	926	948	18	0.7222	0.8333	ENSG00000136153|ENST00000341547	hsa-miR-30a-5p	0	43	48	43	48	10586	6mer	x	6mer	0		0	LMO7	protein_coding
ENSG00000136153	hsa-miR-30b-5p	ENSG00000136153|ENST00000341547	152	-11.27	2	18	926	948	17	0.7059	0.8235	ENSG00000136153|ENST00000341547	hsa-miR-30b-5p	0	43	48	43	48	10587	6mer	x	6mer	0		0	LMO7	protein_coding
ENSG00000136153	hsa-miR-30c-5p	ENSG00000136153|ENST00000341547	154	-11.14	2	20	925	948	19	0.6842	0.7895	ENSG00000136153|ENST00000341547	hsa-miR-30c-5p	0	43	48	43	48	10588	6mer	x	6mer	0		0	LMO7	protein_coding
ENSG00000136153	hsa-miR-30d-5p	ENSG00000136153|ENST00000341547	161	-20.4	2	19	926	948	18	0.7778	0.8333	ENSG00000136153|ENST00000341547	hsa-miR-30d-5p	0	43	48	43	48	10589	6mer	x	6mer	0		0	LMO7	protein_coding
ENSG00000136153	hsa-miR-30e-3p	ENSG00000136153|ENST00000341547	151	-11.56	2	21	931	953	20	0.55	0.85	ENSG00000136153|ENST00000341547	hsa-miR-30e-3p	0	26	32	26	32	10590	7mer-1a	x	7mer-1a	0		0	LMO7	protein_coding
ENSG00000180398	hsa-miR-15a-5p	ENSG00000180398|ENST00000319466	149	-14.14	2	16	248	268	14	0.7857	0.8571	ENSG00000180398|ENST00000319466	hsa-miR-15a-5p	0	50	56	50	56	10607	7mer-m8	x	7mer-m8	0		0	MCFD2	protein_coding
ENSG00000180398	hsa-miR-15b-5p	ENSG00000180398|ENST00000319466	147	-13.48	2	21	246	268	20	0.6	0.75	ENSG00000180398|ENST00000319466	hsa-miR-15b-5p	0	50	56	50	56	10608	7mer-m8	x	7mer-m8	0		0	MCFD2	protein_coding
ENSG00000187808	hsa-miR-128-3p	ENSG00000187808|ENST00000343905	159	-25.86	2	20	24	44	18	0.6667	0.8333	ENSG00000187808|ENST00000343905	hsa-miR-128-3p	0	45	50	45	50	10623	6mer	x	6mer	0		0	SOWAHD	protein_coding
ENSG00000067225	hsa-miR-199a-3p	ENSG00000067225|ENST00000319622	146	-12.87	2	20	536	558	19	0.6842	0.6842	ENSG00000067225|ENST00000319622	hsa-miR-199a-3p	0	21	26	21	26	10646	6mer	x	6mer	0		0	PKM	protein_coding
ENSG00000067225	hsa-miR-199b-3p	ENSG00000067225|ENST00000319622	146	-12.87	2	20	536	558	19	0.6842	0.6842	ENSG00000067225|ENST00000319622	hsa-miR-199b-3p	0	21	26	21	26	10647	6mer	x	6mer	0		0	PKM	protein_coding
ENSG00000256229	hsa-miR-150-5p	ENSG00000256229|ENST00000335117	143	-15.17	2	17	1847	1870	17	0.7059	0.7059	ENSG00000256229|ENST00000335117	hsa-miR-150-5p	0	34	39	34	39	10651	6mer	x	6mer	0		0	ZNF486	protein_coding
ENSG00000239900	hsa-miR-335-5p	ENSG00000239900|ENST00000342312	145	-13.2	2	10	180	202	8	1	1	ENSG00000239900|ENST00000342312	hsa-miR-335-5p	0	31	36	31	36	10653	6mer	x	6mer	0		0	ADSL	protein_coding
ENSG00000020922	hsa-miR-23a-3p	ENSG00000020922|ENST00000323929	151	-11.18	2	20	2293	2313	18	0.6111	0.7778	ENSG00000020922|ENST00000323929	hsa-miR-23a-3p	0	46	52	46	52	10668	7mer-1a	x	7mer-1a	0		0	MRE11	protein_coding
ENSG00000020922	hsa-miR-23b-3p	ENSG00000020922|ENST00000323929	149	-11.57	2	19	2290	2313	18	0.6667	0.7778	ENSG00000020922|ENST00000323929	hsa-miR-23b-3p	0	46	52	46	52	10669	7mer-1a	x	7mer-1a	0		0	MRE11	protein_coding
ENSG00000020922	hsa-miR-23c	ENSG00000020922|ENST00000323929	153	-12.03	2	19	2291	2313	18	0.7222	0.7778	ENSG00000020922|ENST00000323929	hsa-miR-23c	0	46	52	46	52	10670	7mer-1a	x	7mer-1a	0		0	MRE11	protein_coding
ENSG00000187049	hsa-miR-382-5p	ENSG00000187049|ENST00000334888	140	-12.68	2	9	470	491	7	1	1	ENSG00000187049|ENST00000334888	hsa-miR-382-5p	0	32	38	32	38	10693	7mer-m8	x	7mer-m8	0		0	TMEM216	protein_coding
ENSG00000065923	hsa-miR-21-5p	ENSG00000065923|ENST00000328306	155	-15.29	2	21	1414	1437	21	0.7143	0.7143	ENSG00000065923|ENST00000328306	hsa-miR-21-5p	0	50	56	50	56	10694	7mer-m8	x	7mer-m8	0		0	SLC9A7	protein_coding
ENSG00000197329	hsa-miR-130a-3p	ENSG00000197329|ENST00000358912	151	-10.99	2	17	1272	1294	16	0.75	0.8125	ENSG00000197329|ENST00000358912	hsa-miR-130a-3p	0	27	33	27	33	10705	7mer-m8	x	7mer-m8	0		0	PELI1	protein_coding
ENSG00000054267	hsa-miR-142-5p	ENSG00000054267|ENST00000349213	147	-5.71	2	20	1206	1226	18	0.6667	0.6667	ENSG00000054267|ENST00000349213	hsa-miR-142-5p	0	38	44	38	44	10708	7mer-1a	x	7mer-1a	0		0	ARID4B	protein_coding
ENSG00000134759	hsa-miR-26a-5p	ENSG00000134759|ENST00000358232	141	-9.79	2	12	3789	3809	10	0.9	0.9	ENSG00000134759|ENST00000358232	hsa-miR-26a-5p	0	50	55	50	55	10719	6mer	x	6mer	0		0	ELP2	protein_coding
ENSG00000068366	hsa-miR-142-3p	ENSG00000068366|ENST00000348502	159	-11.79	2	22	407	432	23	0.7391	0.7391	ENSG00000068366|ENST00000348502	hsa-miR-142-3p	0	48	54	48	54	10731	7mer-1a	x	7mer-1a	0		0	ACSL4	protein_coding
ENSG00000197343	hsa-miR-126-5p	ENSG00000197343|ENST00000357864	140	-2.28	2	9	606	626	7	1	1	ENSG00000197343|ENST00000357864	hsa-miR-126-5p	0	42	48	42	48	10732	7mer-1a	x	7mer-1a	0		0	ZNF655	protein_coding
ENSG00000198885	hsa-miR-128-3p	ENSG00000198885|ENST00000361124	157	-24.41	2	19	288	312	21	0.7143	0.7619	ENSG00000198885|ENST00000361124	hsa-miR-128-3p	0	19	24	19	24	10789	6mer	x	6mer	0		0	ITPRIPL1	protein_coding
ENSG00000120899	hsa-miR-15a-5p	ENSG00000120899|ENST00000346049	140	-16.16	2	9	231	252	7	1	1	ENSG00000120899|ENST00000346049	hsa-miR-15a-5p	0	32	37	32	37	10797	6mer	x	6mer	0		0	PTK2B	protein_coding
ENSG00000120899	hsa-miR-15b-5p	ENSG00000120899|ENST00000346049	141	-14.75	2	20	232	252	18	0.6111	0.7222	ENSG00000120899|ENST00000346049	hsa-miR-15b-5p	0	32	37	32	37	10798	6mer	x	6mer	0		0	PTK2B	protein_coding
ENSG00000221838	hsa-miR-224-5p	ENSG00000221838|ENST00000359593	150	-17.75	2	16	921	946	15	0.8	0.8	ENSG00000221838|ENST00000359593	hsa-miR-224-5p	0	35	41	35	41	10802	7mer-m8	x	7mer-m8	0		0	AP4M1	protein_coding
ENSG00000153956	hsa-miR-664a-5p	ENSG00000153956|ENST00000356860	160	-23.16	2	22	781	805	21	0.6667	0.8095	ENSG00000153956|ENST00000356860	hsa-miR-664a-5p	0	29	34	29	34	10811	6mer	x	6mer	0		0	CACNA2D1	protein_coding
ENSG00000198900	hsa-miR-382-5p	ENSG00000198900|ENST00000361337	159	-19.56	2	21	168	190	20	0.6	0.9	ENSG00000198900|ENST00000361337	hsa-miR-382-5p	0	18	24	18	24	10836	7mer-m8	x	7mer-m8	0		0	TOP1	protein_coding
ENSG00000124508	hsa-miR-24-3p	ENSG00000124508|ENST00000356709	158	-20.64	2	20	1662	1685	20	0.7	0.8	ENSG00000124508|ENST00000356709	hsa-miR-24-3p	0	32	38	32	38	10854	7mer-1a	x	7mer-1a	0		0	BTN2A2	protein_coding
ENSG00000197226	hsa-miR-126-5p	ENSG00000197226|ENST00000356834	156	-3.65	2	17	1335	1355	15	0.8	0.8	ENSG00000197226|ENST00000356834	hsa-miR-126-5p	0	25	30	25	30	10856	6mer	x	6mer	0		0	TBC1D9B	protein_coding
ENSG00000072736	hsa-miR-30a-5p	ENSG00000072736|ENST00000346183	147	-16.5	2	16	2614	2635	14	0.7143	0.7857	ENSG00000072736|ENST00000346183	hsa-miR-30a-5p	0	25	31	25	31	10862	7mer-m8	x	7mer-m8	0		0	NFATC3	protein_coding
ENSG00000072736	hsa-miR-30b-5p	ENSG00000072736|ENST00000346183	154	-14.64	2	21	2612	2635	21	0.7143	0.7619	ENSG00000072736|ENST00000346183	hsa-miR-30b-5p	0	25	31	25	31	10863	7mer-m8	x	7mer-m8	0		0	NFATC3	protein_coding
ENSG00000072736	hsa-miR-30c-5p	ENSG00000072736|ENST00000346183	145	-14.51	2	10	2613	2635	8	1	1	ENSG00000072736|ENST00000346183	hsa-miR-30c-5p	0	25	31	25	31	10864	7mer-m8	x	7mer-m8	0		0	NFATC3	protein_coding
ENSG00000072736	hsa-miR-30d-5p	ENSG00000072736|ENST00000346183	151	-16.5	2	16	2614	2635	14	0.7857	0.7857	ENSG00000072736|ENST00000346183	hsa-miR-30d-5p	0	25	31	25	31	10865	7mer-m8	x	7mer-m8	0		0	NFATC3	protein_coding
ENSG00000148516	hsa-miR-128-3p	ENSG00000148516|ENST00000361642	150	-14.13	2	11	1654	1674	9	1	1	ENSG00000148516|ENST00000361642	hsa-miR-128-3p	0	50	56	50	56	10868	7mer-1a	x	7mer-1a	0		0	ZEB1	protein_coding
ENSG00000148516	hsa-miR-27a-3p	ENSG00000148516|ENST00000361642	142	-15.77	2	16	1968	1989	15	0.6667	0.8	ENSG00000148516|ENST00000361642	hsa-miR-27a-3p	0	50	57	50	57	10869	8mer-1a	x	8mer-1a	0		0	ZEB1	protein_coding
ENSG00000148516	hsa-miR-27b-3p	ENSG00000148516|ENST00000361642	142	-15.54	2	16	1968	1989	15	0.6667	0.8	ENSG00000148516|ENST00000361642	hsa-miR-27b-3p	0	50	57	50	57	10870	8mer-1a	x	8mer-1a	0		0	ZEB1	protein_coding
ENSG00000064666	hsa-miR-24-3p	ENSG00000064666|ENST00000348419	155	-24.27	2	21	169	192	21	0.6667	0.7619	ENSG00000064666|ENST00000348419	hsa-miR-24-3p	0	20	25	20	25	10893	6mer	x	6mer	0		0	CNN2	protein_coding
ENSG00000176244	hsa-miR-339-5p	ENSG00000176244|ENST00000356189	151	-16.94	2	18	2711	2732	16	0.75	0.8125	ENSG00000176244|ENST00000356189	hsa-miR-339-5p	0	24	31	24	31	10899	8mer-1a	x	8mer-1a	0		0	ACBD7	protein_coding
ENSG00000176884	hsa-miR-23a-3p	ENSG00000176884|ENST00000350902	148	-12.83	2	19	1353	1372	17	0.6471	0.8235	ENSG00000176884|ENST00000350902	hsa-miR-23a-3p	0	21	27	21	27	10951	7mer-1a	x	7mer-1a	0		0	GRIN1	protein_coding
ENSG00000176884	hsa-miR-23b-3p	ENSG00000176884|ENST00000350902	150	-14.9	2	22	1349	1372	22	0.6364	0.7727	ENSG00000176884|ENST00000350902	hsa-miR-23b-3p	0	21	27	21	27	10952	7mer-1a	x	7mer-1a	0		0	GRIN1	protein_coding
ENSG00000176884	hsa-miR-23c	ENSG00000176884|ENST00000350902	149	-15.02	2	21	1355	1372	19	0.7895	0.7895	ENSG00000176884|ENST00000350902	hsa-miR-23c	0	21	27	21	27	10953	7mer-1a	x	7mer-1a	0		0	GRIN1	protein_coding
ENSG00000113578	hsa-miR-25-3p	ENSG00000113578|ENST00000359370	155	-11.68	2	21	1833	1856	21	0.6667	0.7619	ENSG00000113578|ENST00000359370	hsa-miR-25-3p	0	46	51	46	51	10958	6mer	x	6mer	0		0	FGF1	protein_coding
ENSG00000113578	hsa-miR-92a-3p	ENSG00000113578|ENST00000359370	147	-11.93	2	21	1833	1856	21	0.619	0.7143	ENSG00000113578|ENST00000359370	hsa-miR-92a-3p	0	46	51	46	51	10959	6mer	x	6mer	0		0	FGF1	protein_coding
ENSG00000170423	hsa-miR-320c	ENSG00000170423|ENST00000359499	142	-11.8	2	11	1060	1079	9	0.7778	1	ENSG00000170423|ENST00000359499	hsa-miR-320c	0	36	42	36	42	10991	7mer-1a	x	7mer-1a	0		0	KRT78	protein_coding
ENSG00000170423	hsa-miR-320d	ENSG00000170423|ENST00000359499	142	-11.93	2	11	1061	1079	9	0.7778	1	ENSG00000170423|ENST00000359499	hsa-miR-320d	0	36	42	36	42	10992	7mer-1a	x	7mer-1a	0		0	KRT78	protein_coding
ENSG00000100813	hsa-miR-142-5p	ENSG00000100813|ENST00000357481	152	-7.32	2	13	466	486	11	0.9091	0.9091	ENSG00000100813|ENST00000357481	hsa-miR-142-5p	0	34	40	34	40	10993	7mer-1a	x	7mer-1a	0		0	ACIN1	protein_coding
ENSG00000111716	hsa-miR-23a-3p	ENSG00000111716|ENST00000350669	145	-13.69	2	10	24	44	8	1	1	ENSG00000111716|ENST00000350669	hsa-miR-23a-3p	0	40	47	40	47	11042	8mer-1a	x	8mer-1a	0		0	LDHB	protein_coding
ENSG00000111716	hsa-miR-23b-3p	ENSG00000111716|ENST00000350669	149	-14.08	2	20	23	44	18	0.7222	0.7222	ENSG00000111716|ENST00000350669	hsa-miR-23b-3p	0	40	47	40	47	11043	8mer-1a	x	8mer-1a	0		0	LDHB	protein_coding
ENSG00000111716	hsa-miR-23c	ENSG00000111716|ENST00000350669	157	-13.94	2	20	24	44	18	0.7778	0.7778	ENSG00000111716|ENST00000350669	hsa-miR-23c	0	40	47	40	47	11044	8mer-1a	x	8mer-1a	0		0	LDHB	protein_coding
ENSG00000168411	hsa-miR-196a-5p	ENSG00000168411|ENST00000361070	144	-12.12	2	13	2332	2353	11	0.8182	0.8182	ENSG00000168411|ENST00000361070	hsa-miR-196a-5p	0	55	60	55	60	11053	6mer	x	6mer	0		0	RFWD3	protein_coding
ENSG00000168411	hsa-miR-196b-5p	ENSG00000168411|ENST00000361070	140	-10.61	2	9	2332	2353	7	1	1	ENSG00000168411|ENST00000361070	hsa-miR-196b-5p	0	55	60	55	60	11054	6mer	x	6mer	0		0	RFWD3	protein_coding
ENSG00000143537	hsa-miR-361-3p	ENSG00000143537|ENST00000360674	140	-20.5	2	9	234	256	7	1	1	ENSG00000143537|ENST00000360674	hsa-miR-361-3p	0	37	44	37	44	11055	8mer-1a	x	8mer-1a	0		0	ADAM15	protein_coding
ENSG00000138162	hsa-miR-320c	ENSG00000138162|ENST00000360561	140	-13.7	2	9	309	328	7	1	1	ENSG00000138162|ENST00000360561	hsa-miR-320c	0	52	58	52	58	11078	7mer-m8	x	7mer-m8	0		0	TACC2	protein_coding
ENSG00000138162	hsa-miR-320d	ENSG00000138162|ENST00000360561	140	-9.94	2	9	310	328	7	1	1	ENSG00000138162|ENST00000360561	hsa-miR-320d	0	52	58	52	58	11079	7mer-m8	x	7mer-m8	0		0	TACC2	protein_coding
ENSG00000196935	hsa-miR-150-5p	ENSG00000196935|ENST00000355086	158	-22.88	2	20	8138	8161	20	0.75	0.75	ENSG00000196935|ENST00000355086	hsa-miR-150-5p	0	47	54	47	54	11091	8mer-1a	x	8mer-1a	0		0	SRGAP1	protein_coding
ENSG00000196935	hsa-miR-25-3p	ENSG00000196935|ENST00000355086	161	-25.98	2	21	2214	2239	23	0.7391	0.8261	ENSG00000196935|ENST00000355086	hsa-miR-25-3p	0	23	29	23	29	11092	7mer-m8	x	7mer-m8	0		0	SRGAP1	protein_coding
ENSG00000196935	hsa-miR-92a-3p	ENSG00000196935|ENST00000355086	157	-23.43	2	21	2214	2239	23	0.7391	0.7826	ENSG00000196935|ENST00000355086	hsa-miR-92a-3p	0	23	29	23	29	11093	7mer-m8	x	7mer-m8	0		0	SRGAP1	protein_coding
ENSG00000101266	hsa-miR-26a-5p	ENSG00000101266|ENST00000349736	142	-9.68	2	19	2025	2045	18	0.6667	0.7778	ENSG00000101266|ENST00000349736	hsa-miR-26a-5p	0	51	57	51	57	11105	7mer-m8	x	7mer-m8	0		0	CSNK2A1	protein_coding
ENSG00000198420	hsa-miR-30a-3p	ENSG00000198420|ENST00000355951	156	-16.19	2	20	16	35	18	0.7222	0.8333	ENSG00000198420|ENST00000355951	hsa-miR-30a-3p	0	41	46	41	46	11151	6mer	x	6mer	0		0	TCAF1	protein_coding
ENSG00000198420	hsa-miR-30e-3p	ENSG00000198420|ENST00000355951	150	-12.8	2	20	13	35	19	0.6316	0.7895	ENSG00000198420|ENST00000355951	hsa-miR-30e-3p	0	41	46	41	46	11152	6mer	x	6mer	0		0	TCAF1	protein_coding
ENSG00000157087	hsa-miR-181a-5p	ENSG00000157087|ENST00000352432	146	-11.73	2	21	671	692	19	0.6316	0.7368	ENSG00000157087|ENST00000352432	hsa-miR-181a-5p	0	25	31	25	31	11155	7mer-m8	x	7mer-m8	0		0	ATP2B2	protein_coding
ENSG00000157087	hsa-miR-181b-5p	ENSG00000157087|ENST00000352432	154	-18.09	2	21	671	692	19	0.6842	0.7895	ENSG00000157087|ENST00000352432	hsa-miR-181b-5p	0	25	31	25	31	11156	7mer-m8	x	7mer-m8	0		0	ATP2B2	protein_coding
ENSG00000118257	hsa-miR-339-5p	ENSG00000118257|ENST00000357785	148	-29.82	2	22	2795	2819	22	0.6364	0.6818	ENSG00000118257|ENST00000357785	hsa-miR-339-5p	0	20	25	20	25	11166	6mer	x	6mer	0		0	NRP2	protein_coding
ENSG00000117298	hsa-miR-150-5p	ENSG00000117298|ENST00000357071	140	-15.8	2	9	1089	1110	7	1	1	ENSG00000117298|ENST00000357071	hsa-miR-150-5p	0	49	54	49	54	11172	6mer	x	6mer	0		0	ECE1	protein_coding
ENSG00000143365	hsa-miR-335-5p	ENSG00000143365|ENST00000356728	145	-13.05	2	10	1082	1104	8	1	1	ENSG00000143365|ENST00000356728	hsa-miR-335-5p	0	24	30	24	30	11201	7mer-1a	x	7mer-1a	0		0	RORC	protein_coding
ENSG00000107938	hsa-miR-27a-3p	ENSG00000107938|ENST00000356792	155	-17.04	2	18	603	622	16	0.8125	0.8125	ENSG00000107938|ENST00000356792	hsa-miR-27a-3p	0	54	59	54	59	11206	6mer	x	6mer	0		0	EDRF1	protein_coding
ENSG00000107938	hsa-miR-27b-3p	ENSG00000107938|ENST00000356792	155	-17.98	2	18	603	622	16	0.8125	0.8125	ENSG00000107938|ENST00000356792	hsa-miR-27b-3p	0	54	59	54	59	11207	6mer	x	6mer	0		0	EDRF1	protein_coding
ENSG00000119969	hsa-miR-24-3p	ENSG00000119969|ENST00000348459	140	-12.78	2	9	139	160	7	1	1	ENSG00000119969|ENST00000348459	hsa-miR-24-3p	0	54	59	54	59	11240	6mer	x	6mer	0		0	HELLS	protein_coding
ENSG00000139926	hsa-miR-150-5p	ENSG00000139926|ENST00000356218	149	-15.18	2	20	406	426	18	0.7222	0.7222	ENSG00000139926|ENST00000356218	hsa-miR-150-5p	0	54	60	54	60	11241	7mer-m8	x	7mer-m8	0		0	FRMD6	protein_coding
ENSG00000137171	hsa-miR-15a-5p	ENSG00000137171|ENST00000347162	149	-17.98	2	19	113	135	18	0.7222	0.7222	ENSG00000137171|ENST00000347162	hsa-miR-15a-5p	0	44	50	44	50	11253	7mer-m8	x	7mer-m8	0		0	KLC4	protein_coding
ENSG00000137171	hsa-miR-15b-5p	ENSG00000137171|ENST00000347162	157	-20.18	2	21	113	135	21	0.7619	0.7619	ENSG00000137171|ENST00000347162	hsa-miR-15b-5p	0	44	50	44	50	11255	7mer-m8	x	7mer-m8	0		0	KLC4	protein_coding
ENSG00000116962	hsa-miR-7847-3p	ENSG00000116962|ENST00000366595	159	-28.75	2	20	981	1001	18	0.7222	0.7778	ENSG00000116962|ENST00000366595	hsa-miR-7847-3p	0	48	53	48	53	11270	6mer	x	6mer	0		0	NID1	protein_coding
ENSG00000154380	hsa-miR-7847-3p	ENSG00000154380|ENST00000366844	140	-14.38	2	9	6737	6757	7	1	1	ENSG00000154380|ENST00000366844	hsa-miR-7847-3p	0	30	35	30	35	11285	6mer	x	6mer	0		0	ENAH	protein_coding
ENSG00000198865	hsa-miR-192-5p	ENSG00000198865|ENST00000361970	146	-9.14	2	15	628	648	13	0.7692	0.7692	ENSG00000198865|ENST00000361970	hsa-miR-192-5p	0	18	23	18	23	11293	6mer	x	6mer	0		0	CCDC152	protein_coding
ENSG00000198865	hsa-miR-215-5p	ENSG00000198865|ENST00000361970	146	-11.38	2	15	628	648	13	0.7692	0.7692	ENSG00000198865|ENST00000361970	hsa-miR-215-5p	0	18	23	18	23	11294	6mer	x	6mer	0		0	CCDC152	protein_coding
ENSG00000085514	hsa-miR-320c	ENSG00000085514|ENST00000350573	150	-15.83	2	16	103	123	15	0.7333	0.8667	ENSG00000085514|ENST00000350573	hsa-miR-320c	0	15	20	15	20	11296	6mer	x	6mer	0		0	PILRA	protein_coding
ENSG00000085514	hsa-miR-320d	ENSG00000085514|ENST00000350573	150	-15.83	2	16	104	123	15	0.7333	0.8667	ENSG00000085514|ENST00000350573	hsa-miR-320d	0	15	20	15	20	11297	6mer	x	6mer	0		0	PILRA	protein_coding
ENSG00000162999	hsa-miR-335-5p	ENSG00000162999|ENST00000354221	150	-13.21	2	21	589	616	24	0.6667	0.7083	ENSG00000162999|ENST00000354221	hsa-miR-335-5p	0	39	44	39	44	11307	6mer	x	6mer	0		0	DUSP19	protein_coding
ENSG00000198142	hsa-miR-29a-3p	ENSG00000198142|ENST00000356454	159	-17.07	2	20	906	925	18	0.8333	0.8333	ENSG00000198142|ENST00000356454	hsa-miR-29a-3p	0	22	27	22	27	11372	6mer	x	6mer	0		0	SOWAHC	protein_coding
ENSG00000198142	hsa-miR-29b-3p	ENSG00000198142|ENST00000356454	160	-15.51	2	22	906	925	20	0.8	0.8	ENSG00000198142|ENST00000356454	hsa-miR-29b-3p	0	22	27	22	27	11373	6mer	x	6mer	0		0	SOWAHC	protein_coding
ENSG00000198142	hsa-miR-29c-3p	ENSG00000198142|ENST00000356454	164	-17.07	2	20	906	925	18	0.8333	0.8333	ENSG00000198142|ENST00000356454	hsa-miR-29c-3p	0	22	27	22	27	11374	6mer	x	6mer	0		0	SOWAHC	protein_coding
ENSG00000197586	hsa-miR-199a-5p	ENSG00000197586|ENST00000354989	157	-18.87	2	14	102	124	12	0.9167	0.9167	ENSG00000197586|ENST00000354989	hsa-miR-199a-5p	0	44	49	44	49	11420	6mer	x	6mer	0		0	ENTPD6	protein_coding
ENSG00000198380	hsa-miR-425-5p	ENSG00000198380|ENST00000361060	163	-19.31	2	22	1777	1798	20	0.75	0.8	ENSG00000198380|ENST00000361060	hsa-miR-425-5p	0	49	54	49	54	11432	6mer	x	6mer	0		0	GFPT1	protein_coding
ENSG00000143641	hsa-miR-320c	ENSG00000143641|ENST00000366672	161	-26.68	2	19	247	267	18	0.7778	0.8333	ENSG00000143641|ENST00000366672	hsa-miR-320c	0	34	40	34	40	11443	7mer-m8	x	7mer-m8	0		0	GALNT2	protein_coding
ENSG00000143641	hsa-miR-320d	ENSG00000143641|ENST00000366672	156	-23.39	2	18	248	267	17	0.7647	0.8235	ENSG00000143641|ENST00000366672	hsa-miR-320d	0	34	40	34	40	11444	7mer-m8	x	7mer-m8	0		0	GALNT2	protein_coding
ENSG00000198105	hsa-miR-24-3p	ENSG00000198105|ENST00000357328	144	-17.53	2	17	2329	2350	15	0.6667	0.7333	ENSG00000198105|ENST00000357328	hsa-miR-24-3p	0	28	34	28	34	11447	7mer-1a	x	7mer-1a	0		0	ZNF248	protein_coding
ENSG00000124214	hsa-miR-30a-5p	ENSG00000124214|ENST00000347458	147	-16.83	2	21	1267	1285	19	0.7368	0.7368	ENSG00000124214|ENST00000347458	hsa-miR-30a-5p	0	32	38	32	38	11458	7mer-1a	x	7mer-1a	0		0	STAU1	protein_coding
ENSG00000124214	hsa-miR-30b-5p	ENSG00000124214|ENST00000347458	140	-9.55	2	9	1264	1285	7	1	1	ENSG00000124214|ENST00000347458	hsa-miR-30b-5p	0	32	38	32	38	11459	7mer-1a	x	7mer-1a	0		0	STAU1	protein_coding
ENSG00000124214	hsa-miR-30c-5p	ENSG00000124214|ENST00000347458	140	-11.83	2	9	1263	1285	7	1	1	ENSG00000124214|ENST00000347458	hsa-miR-30c-5p	0	32	38	32	38	11460	7mer-1a	x	7mer-1a	0		0	STAU1	protein_coding
ENSG00000124214	hsa-miR-30d-5p	ENSG00000124214|ENST00000347458	144	-16.83	2	21	1267	1285	19	0.6842	0.6842	ENSG00000124214|ENST00000347458	hsa-miR-30d-5p	0	32	38	32	38	11461	7mer-1a	x	7mer-1a	0		0	STAU1	protein_coding
ENSG00000158901	hsa-miR-128-3p	ENSG00000158901|ENST00000357199	146	-17.12	2	20	243	264	19	0.6316	0.7368	ENSG00000158901|ENST00000357199	hsa-miR-128-3p	0	21	27	21	27	11476	7mer-m8	x	7mer-m8	0		0	WFDC8	protein_coding
ENSG00000112144	hsa-miR-7847-3p	ENSG00000112144|ENST00000350082	154	-21.73	2	19	1629	1647	17	0.8235	0.8235	ENSG00000112144|ENST00000350082	hsa-miR-7847-3p	0	28	34	28	34	11494	7mer-m8	x	7mer-m8	0		0	CILK1	protein_coding
ENSG00000073670	hsa-miR-181a-5p	ENSG00000073670|ENST00000355638	158	-19.06	2	21	1822	1848	23	0.7391	0.7391	ENSG00000073670|ENST00000355638	hsa-miR-181a-5p	0	43	49	43	49	11499	7mer-1a	x	7mer-1a	0		0	ADAM11	protein_coding
ENSG00000073670	hsa-miR-181b-5p	ENSG00000073670|ENST00000355638	157	-23.65	2	22	1826	1848	20	0.65	0.75	ENSG00000073670|ENST00000355638	hsa-miR-181b-5p	0	43	49	43	49	11500	7mer-1a	x	7mer-1a	0		0	ADAM11	protein_coding
ENSG00000122566	hsa-miR-23a-3p	ENSG00000122566|ENST00000354667	146	-14.74	2	17	1757	1776	15	0.7333	0.8	ENSG00000122566|ENST00000354667	hsa-miR-23a-3p	0	44	49	44	49	11520	6mer	x	6mer	0		0	HNRNPA2B1	protein_coding
ENSG00000122566	hsa-miR-23b-3p	ENSG00000122566|ENST00000354667	146	-14.74	2	17	1755	1776	15	0.7333	0.8	ENSG00000122566|ENST00000354667	hsa-miR-23b-3p	0	44	49	44	49	11521	6mer	x	6mer	0		0	HNRNPA2B1	protein_coding
ENSG00000122566	hsa-miR-23c	ENSG00000122566|ENST00000354667	154	-13.42	2	17	1756	1776	15	0.8	0.8667	ENSG00000122566|ENST00000354667	hsa-miR-23c	0	44	49	44	49	11522	6mer	x	6mer	0		0	HNRNPA2B1	protein_coding
ENSG00000010318	hsa-miR-27a-3p	ENSG00000010318|ENST00000347025	150	-16.58	2	19	70	90	17	0.7059	0.7059	ENSG00000010318|ENST00000347025	hsa-miR-27a-3p	0	47	52	47	52	11534	6mer	x	6mer	0		0	PHF7	protein_coding
ENSG00000010318	hsa-miR-27b-3p	ENSG00000010318|ENST00000347025	155	-16.56	2	20	70	90	18	0.7222	0.7222	ENSG00000010318|ENST00000347025	hsa-miR-27b-3p	0	47	52	47	52	11535	6mer	x	6mer	0		0	PHF7	protein_coding
ENSG00000107643	hsa-miR-664a-5p	ENSG00000107643|ENST00000360332	144	-14.26	2	21	622	642	19	0.6842	0.6842	ENSG00000107643|ENST00000360332	hsa-miR-664a-5p	0	37	42	37	42	11563	6mer	x	6mer	0		0	MAPK8	protein_coding
ENSG00000136521	hsa-miR-126-5p	ENSG00000136521|ENST00000359944	153	-12.23	2	19	736	758	19	0.6842	0.7895	ENSG00000136521|ENST00000359944	hsa-miR-126-5p	0	31	36	31	36	11567	6mer	x	6mer	0		0	NDUFB5	protein_coding
ENSG00000197471	hsa-miR-432-5p	ENSG00000197471|ENST00000360121	149	-20.84	2	22	1764	1786	20	0.65	0.65	ENSG00000197471|ENST00000360121	hsa-miR-432-5p	0	23	29	23	29	11593	7mer-m8	x	7mer-m8	0		0	SPN	protein_coding
ENSG00000172349	hsa-miR-27a-3p	ENSG00000172349|ENST00000360547	147	-16.66	2	13	1494	1516	13	0.8462	0.8462	ENSG00000172349|ENST00000360547	hsa-miR-27a-3p	0	51	56	51	56	11596	6mer	x	6mer	0		0	IL16	protein_coding
ENSG00000172349	hsa-miR-27b-3p	ENSG00000172349|ENST00000360547	150	-21.94	2	20	1494	1516	20	0.7	0.7	ENSG00000172349|ENST00000360547	hsa-miR-27b-3p	0	51	56	51	56	11597	6mer	x	6mer	0		0	IL16	protein_coding
ENSG00000172349	hsa-miR-664a-5p	ENSG00000172349|ENST00000360547	158	-19.33	2	19	2041	2064	17	0.7647	0.7647	ENSG00000172349|ENST00000360547	hsa-miR-664a-5p	0	29	35	29	35	11598	7mer-m8	x	7mer-m8	0		0	IL16	protein_coding
ENSG00000011021	hsa-miR-27a-3p	ENSG00000011021|ENST00000346436	149	-9.73	2	18	2249	2269	16	0.6875	0.75	ENSG00000011021|ENST00000346436	hsa-miR-27a-3p	0	55	60	55	60	11603	6mer	x	6mer	0		0	CLCN6	protein_coding
ENSG00000011021	hsa-miR-27b-3p	ENSG00000011021|ENST00000346436	151	-11.41	2	20	2249	2269	18	0.6667	0.7222	ENSG00000011021|ENST00000346436	hsa-miR-27b-3p	0	55	60	55	60	11604	6mer	x	6mer	0		0	CLCN6	protein_coding
ENSG00000132704	hsa-miR-27a-3p	ENSG00000132704|ENST00000361516	156	-15.47	2	18	300	321	17	0.7647	0.8235	ENSG00000132704|ENST00000361516	hsa-miR-27a-3p	0	32	38	32	38	11609	7mer-1a	x	7mer-1a	0		0	FCRL2	protein_coding
ENSG00000132704	hsa-miR-27b-3p	ENSG00000132704|ENST00000361516	156	-15.58	2	18	300	321	17	0.7647	0.8235	ENSG00000132704|ENST00000361516	hsa-miR-27b-3p	0	32	38	32	38	11610	7mer-1a	x	7mer-1a	0		0	FCRL2	protein_coding
ENSG00000130669	hsa-miR-199a-3p	ENSG00000130669|ENST00000360442	146	-19.57	2	21	583	608	23	0.6522	0.6957	ENSG00000130669|ENST00000360442	hsa-miR-199a-3p	0	34	39	34	39	11617	6mer	x	6mer	0		0	PAK4	protein_coding
ENSG00000130669	hsa-miR-199b-3p	ENSG00000130669|ENST00000360442	146	-19.57	2	21	583	608	23	0.6522	0.6957	ENSG00000130669|ENST00000360442	hsa-miR-199b-3p	0	34	39	34	39	11618	6mer	x	6mer	0		0	PAK4	protein_coding
ENSG00000154358	hsa-miR-29a-3p	ENSG00000154358|ENST00000366706	144	-14.63	2	13	109	130	11	0.8182	0.8182	ENSG00000154358|ENST00000366706	hsa-miR-29a-3p	0	38	43	38	43	11627	6mer	x	6mer	0		0	OBSCN	protein_coding
ENSG00000154358	hsa-miR-29b-3p	ENSG00000154358|ENST00000366706	141	-12.83	2	19	106	130	19	0.6316	0.6842	ENSG00000154358|ENST00000366706	hsa-miR-29b-3p	0	38	43	38	43	11628	6mer	x	6mer	0		0	OBSCN	protein_coding
ENSG00000154358	hsa-miR-29c-3p	ENSG00000154358|ENST00000366706	140	-13.24	2	9	109	130	7	1	1	ENSG00000154358|ENST00000366706	hsa-miR-29c-3p	0	38	43	38	43	11629	6mer	x	6mer	0		0	OBSCN	protein_coding
ENSG00000101812	hsa-miR-664a-5p	ENSG00000101812|ENST00000355016	140	-14.72	2	9	896	919	7	1	1	ENSG00000101812|ENST00000355016	hsa-miR-664a-5p	0	34	40	34	40	11631	7mer-m8	x	7mer-m8	0		0	H2BW2	protein_coding
ENSG00000197249	hsa-miR-24-3p	ENSG00000197249|ENST00000355814	140	-16.66	2	9	1573	1594	7	1	1	ENSG00000197249|ENST00000355814	hsa-miR-24-3p	0	41	47	41	47	11646	7mer-m8	x	7mer-m8	0		0	SERPINA1	protein_coding
ENSG00000196655	hsa-miR-128-3p	ENSG00000196655|ENST00000359005	144	-15.8	2	19	141	160	17	0.7059	0.7059	ENSG00000196655|ENST00000359005	hsa-miR-128-3p	0	32	38	32	38	11651	7mer-m8	x	7mer-m8	0		0	TRAPPC4	protein_coding
ENSG00000197217	hsa-miR-30a-3p	ENSG00000197217|ENST00000358689	150	-12.66	2	21	3713	3736	21	0.7143	0.7143	ENSG00000197217|ENST00000358689	hsa-miR-30a-3p	0	20	26	20	26	11718	7mer-1a	x	7mer-1a	0		0	ENTPD4	protein_coding
ENSG00000197217	hsa-miR-30e-3p	ENSG00000197217|ENST00000358689	144	-10.68	2	18	3714	3736	17	0.7059	0.7059	ENSG00000197217|ENST00000358689	hsa-miR-30e-3p	0	20	26	20	26	11719	7mer-1a	x	7mer-1a	0		0	ENTPD4	protein_coding
ENSG00000198681	hsa-miR-23a-3p	ENSG00000198681|ENST00000356661	163	-10.07	2	20	364	384	18	0.7222	0.8333	ENSG00000198681|ENST00000356661	hsa-miR-23a-3p	0	53	58	53	58	11728	6mer	x	6mer	0		0	MAGEA1	protein_coding
ENSG00000198681	hsa-miR-23b-3p	ENSG00000198681|ENST00000356661	158	-9.82	2	19	362	384	17	0.7059	0.8235	ENSG00000198681|ENST00000356661	hsa-miR-23b-3p	0	53	58	53	58	11729	6mer	x	6mer	0		0	MAGEA1	protein_coding
ENSG00000198681	hsa-miR-23c	ENSG00000198681|ENST00000356661	158	-11.07	2	20	362	384	19	0.7368	0.7895	ENSG00000198681|ENST00000356661	hsa-miR-23c	0	53	58	53	58	11730	6mer	x	6mer	0		0	MAGEA1	protein_coding
ENSG00000121578	hsa-miR-23a-3p	ENSG00000121578|ENST00000359213	148	-13.1	2	20	776	802	24	0.6667	0.75	ENSG00000121578|ENST00000359213	hsa-miR-23a-3p	0	54	60	54	60	11738	7mer-m8	x	7mer-m8	0		0	B4GALT4	protein_coding
ENSG00000121578	hsa-miR-23b-3p	ENSG00000121578|ENST00000359213	143	-13.1	2	17	778	802	17	0.6471	0.7647	ENSG00000121578|ENST00000359213	hsa-miR-23b-3p	0	54	60	54	60	11739	7mer-m8	x	7mer-m8	0		0	B4GALT4	protein_coding
ENSG00000121578	hsa-miR-23c	ENSG00000121578|ENST00000359213	140	-9.5	2	9	781	802	7	1	1	ENSG00000121578|ENST00000359213	hsa-miR-23c	0	54	60	54	60	11740	7mer-m8	x	7mer-m8	0		0	B4GALT4	protein_coding
ENSG00000111837	hsa-miR-15a-5p	ENSG00000111837|ENST00000354489	156	-22.37	2	21	1194	1215	19	0.6842	0.7368	ENSG00000111837|ENST00000354489	hsa-miR-15a-5p	0	51	58	51	58	11754	8mer-1a	x	8mer-1a	0		0	MAK	protein_coding
ENSG00000111837	hsa-miR-15b-5p	ENSG00000111837|ENST00000354489	152	-19.4	2	20	1194	1215	19	0.7368	0.7895	ENSG00000111837|ENST00000354489	hsa-miR-15b-5p	0	51	58	51	58	11755	8mer-1a	x	8mer-1a	0		0	MAK	protein_coding
ENSG00000196177	hsa-miR-425-5p	ENSG00000196177|ENST00000358776	156	-14.92	2	18	4223	4246	17	0.7647	0.8235	ENSG00000196177|ENST00000358776	hsa-miR-425-5p	0	30	36	30	36	11769	7mer-m8	x	7mer-m8	0		0	ACADSB	protein_coding
ENSG00000256771	hsa-miR-7847-3p	ENSG00000256771|ENST00000355650	146	-20.03	2	20	645	666	19	0.6316	0.7368	ENSG00000256771|ENST00000355650	hsa-miR-7847-3p	0	24	29	24	29	11788	6mer	x	6mer	0		0	ZNF253	protein_coding
ENSG00000157131	hsa-miR-224-5p	ENSG00000157131|ENST00000361249	147	-16.26	2	24	473	497	22	0.5909	0.6364	ENSG00000157131|ENST00000361249	hsa-miR-224-5p	0	30	35	30	35	11796	6mer	x	6mer	0		0	C8A	protein_coding
ENSG00000181722	hsa-miR-7847-3p	ENSG00000181722|ENST00000357258	158	-26.57	2	20	15407	15430	21	0.6667	0.8095	ENSG00000181722|ENST00000357258	hsa-miR-7847-3p	0	46	53	46	53	11807	8mer-1a	x	8mer-1a	0		0	ZBTB20	protein_coding
ENSG00000198133	hsa-miR-29a-3p	ENSG00000198133|ENST00000357461	141	-18.93	2	10	599	620	8	0.875	1	ENSG00000198133|ENST00000357461	hsa-miR-29a-3p	0	55	60	55	60	11817	6mer	x	6mer	0		0	TMEM229B	protein_coding
ENSG00000198133	hsa-miR-29b-3p	ENSG00000198133|ENST00000357461	141	-19.58	2	10	598	620	8	0.875	1	ENSG00000198133|ENST00000357461	hsa-miR-29b-3p	0	55	60	55	60	11818	6mer	x	6mer	0		0	TMEM229B	protein_coding
ENSG00000198133	hsa-miR-29c-3p	ENSG00000198133|ENST00000357461	141	-18.93	2	10	599	620	8	0.875	1	ENSG00000198133|ENST00000357461	hsa-miR-29c-3p	0	55	60	55	60	11819	6mer	x	6mer	0		0	TMEM229B	protein_coding
ENSG00000196776	hsa-miR-150-5p	ENSG00000196776|ENST00000361309	150	-20.72	2	11	529	550	9	1	1	ENSG00000196776|ENST00000361309	hsa-miR-150-5p	0	26	32	26	32	11841	7mer-m8	x	7mer-m8	0		0	CD47	protein_coding
ENSG00000144674	hsa-miR-15a-5p	ENSG00000144674|ENST00000356847	145	-17.88	2	16	4	29	18	0.7222	0.7778	ENSG00000144674|ENST00000356847	hsa-miR-15a-5p	0	49	56	49	56	11861	8mer-1a	x	8mer-1a	0		0	GOLGA4	protein_coding
ENSG00000144674	hsa-miR-15b-5p	ENSG00000144674|ENST00000356847	145	-17.38	2	16	4	29	18	0.7222	0.7778	ENSG00000144674|ENST00000356847	hsa-miR-15b-5p	0	49	56	49	56	11862	8mer-1a	x	8mer-1a	0		0	GOLGA4	protein_coding
ENSG00000198682	hsa-miR-25-3p	ENSG00000198682|ENST00000361175	152	-17.27	2	20	558	585	24	0.7083	0.75	ENSG00000198682|ENST00000361175	hsa-miR-25-3p	0	42	48	42	48	11882	7mer-m8	x	7mer-m8	0		0	PAPSS2	protein_coding
ENSG00000198682	hsa-miR-92a-3p	ENSG00000198682|ENST00000361175	144	-13.79	2	13	564	585	11	0.8182	0.8182	ENSG00000198682|ENST00000361175	hsa-miR-92a-3p	0	42	48	42	48	11884	7mer-m8	x	7mer-m8	0		0	PAPSS2	protein_coding
ENSG00000164270	hsa-miR-335-5p	ENSG00000164270|ENST00000362016	145	-12.66	2	15	1376	1399	14	0.7857	0.7857	ENSG00000164270|ENST00000362016	hsa-miR-335-5p	0	38	43	38	43	11885	6mer	x	6mer	0		0	HTR4	protein_coding
ENSG00000136869	hsa-miR-584-5p	ENSG00000136869|ENST00000355622	149	-11.67	2	14	6848	6869	12	0.8333	0.8333	ENSG00000136869|ENST00000355622	hsa-miR-584-5p	0	31	36	31	36	11890	6mer	x	6mer	0		0	TLR4	protein_coding
ENSG00000057663	hsa-miR-128-3p	ENSG00000057663|ENST00000360666	150	-16.7	2	11	1137	1157	9	1	1	ENSG00000057663|ENST00000360666	hsa-miR-128-3p	0	27	33	27	33	11893	7mer-1a	x	7mer-1a	0		0	ATG5	protein_coding
ENSG00000151090	hsa-miR-664a-5p	ENSG00000151090|ENST00000356447	144	-16.64	2	22	3495	3519	21	0.5714	0.7143	ENSG00000151090|ENST00000356447	hsa-miR-664a-5p	0	27	33	27	33	11909	7mer-1a	x	7mer-1a	0		0	THRB	protein_coding
ENSG00000182330	hsa-miR-224-5p	ENSG00000182330|ENST00000357367	150	-19.67	2	24	154	179	23	0.5652	0.7391	ENSG00000182330|ENST00000357367	hsa-miR-224-5p	0	38	44	38	44	11910	7mer-1a	x	7mer-1a	0		0	PRAMEF8	protein_coding
ENSG00000117859	hsa-miR-382-5p	ENSG00000117859|ENST00000361556	144	-10.76	2	18	316	340	19	0.5789	0.7895	ENSG00000117859|ENST00000361556	hsa-miR-382-5p	0	28	33	28	33	11919	6mer	x	6mer	0		0	OSBPL9	protein_coding
ENSG00000167851	hsa-miR-150-5p	ENSG00000167851|ENST00000360141	149	-18.34	2	21	380	399	19	0.6842	0.7368	ENSG00000167851|ENST00000360141	hsa-miR-150-5p	0	23	29	23	29	11933	7mer-m8	x	7mer-m8	0		0	CD300A	protein_coding
ENSG00000197696	hsa-miR-27a-3p	ENSG00000197696|ENST00000360476	148	-14.94	2	17	115	135	15	0.6667	0.8	ENSG00000197696|ENST00000360476	hsa-miR-27a-3p	0	33	38	33	38	11934	6mer	x	6mer	0		0	NMB	protein_coding
ENSG00000197696	hsa-miR-27b-3p	ENSG00000197696|ENST00000360476	148	-13.41	2	17	115	135	15	0.6667	0.8	ENSG00000197696|ENST00000360476	hsa-miR-27b-3p	0	33	38	33	38	11935	6mer	x	6mer	0		0	NMB	protein_coding
ENSG00000159212	hsa-miR-23a-3p	ENSG00000159212|ENST00000349499	153	-18.2	2	16	817	836	14	0.8571	0.8571	ENSG00000159212|ENST00000349499	hsa-miR-23a-3p	0	52	57	52	57	11945	6mer	x	6mer	0		0	CLIC6	protein_coding
ENSG00000159212	hsa-miR-23b-3p	ENSG00000159212|ENST00000349499	153	-18.2	2	16	815	836	14	0.8571	0.8571	ENSG00000159212|ENST00000349499	hsa-miR-23b-3p	0	52	57	52	57	11946	6mer	x	6mer	0		0	CLIC6	protein_coding
ENSG00000159212	hsa-miR-23c	ENSG00000159212|ENST00000349499	145	-10.68	2	16	816	836	14	0.7857	0.7857	ENSG00000159212|ENST00000349499	hsa-miR-23c	0	52	57	52	57	11947	6mer	x	6mer	0		0	CLIC6	protein_coding
ENSG00000143776	hsa-miR-7847-3p	ENSG00000143776|ENST00000366766	158	-23.53	2	20	56	77	19	0.6842	0.8421	ENSG00000143776|ENST00000366766	hsa-miR-7847-3p	0	18	24	18	24	11976	7mer-m8	x	7mer-m8	0		0	CDC42BPA	protein_coding
ENSG00000186812	hsa-miR-30a-5p	ENSG00000186812|ENST00000355632	160	-9.92	2	21	1089	1110	19	0.6842	0.7895	ENSG00000186812|ENST00000355632	hsa-miR-30a-5p	0	42	48	42	48	11994	7mer-1a	x	7mer-1a	0		0	ZNF397	protein_coding
ENSG00000186812	hsa-miR-30b-5p	ENSG00000186812|ENST00000355632	164	-10.46	2	21	1089	1110	19	0.7368	0.7895	ENSG00000186812|ENST00000355632	hsa-miR-30b-5p	0	42	48	42	48	11995	7mer-1a	x	7mer-1a	0		0	ZNF397	protein_coding
ENSG00000186812	hsa-miR-30c-5p	ENSG00000186812|ENST00000355632	161	-10.46	2	18	1088	1110	16	0.8125	0.8125	ENSG00000186812|ENST00000355632	hsa-miR-30c-5p	0	42	48	42	48	11996	7mer-1a	x	7mer-1a	0		0	ZNF397	protein_coding
ENSG00000186812	hsa-miR-30d-5p	ENSG00000186812|ENST00000355632	152	-9.36	2	21	1089	1110	19	0.6316	0.7368	ENSG00000186812|ENST00000355632	hsa-miR-30d-5p	0	42	48	42	48	11997	7mer-1a	x	7mer-1a	0		0	ZNF397	protein_coding
ENSG00000186340	hsa-miR-30a-3p	ENSG00000186340|ENST00000366787	156	-10.96	2	18	1944	1966	17	0.7647	0.8235	ENSG00000186340|ENST00000366787	hsa-miR-30a-3p	0	19	25	19	25	12008	7mer-m8	x	7mer-m8	0		0	THBS2	protein_coding
ENSG00000186340	hsa-miR-30e-3p	ENSG00000186340|ENST00000366787	156	-10.12	2	18	1944	1966	17	0.7647	0.8235	ENSG00000186340|ENST00000366787	hsa-miR-30e-3p	0	19	25	19	25	12009	7mer-m8	x	7mer-m8	0		0	THBS2	protein_coding
ENSG00000198894	hsa-miR-24-3p	ENSG00000198894|ENST00000361786	153	-22.28	2	18	1634	1655	16	0.6875	0.8125	ENSG00000198894|ENST00000361786	hsa-miR-24-3p	0	24	31	24	31	12015	8mer-1a	x	8mer-1a	0		0	CIPC	protein_coding
ENSG00000140931	hsa-miR-24-3p	ENSG00000140931|ENST00000361909	151	-20.21	2	21	10	32	20	0.7	0.7	ENSG00000140931|ENST00000361909	hsa-miR-24-3p	0	20	26	20	26	12023	7mer-m8	x	7mer-m8	0		0	CMTM3	protein_coding
ENSG00000163817	hsa-miR-7847-3p	ENSG00000163817|ENST00000358525	151	-22.63	2	16	2097	2117	14	0.7857	0.7857	ENSG00000163817|ENST00000358525	hsa-miR-7847-3p	0	41	47	41	47	12024	7mer-m8	x	7mer-m8	0		0	SLC6A20	protein_coding
ENSG00000155085	hsa-miR-146a-5p	ENSG00000155085|ENST00000355283	147	-18.18	2	12	747	768	10	0.9	0.9	ENSG00000155085|ENST00000355283	hsa-miR-146a-5p	0	31	38	31	38	12026	8mer-1a	x	8mer-1a	0		0	AK9	protein_coding
ENSG00000155085	hsa-miR-146b-5p	ENSG00000155085|ENST00000355283	147	-16.94	2	12	746	768	10	0.9	0.9	ENSG00000155085|ENST00000355283	hsa-miR-146b-5p	0	31	38	31	38	12027	8mer-1a	x	8mer-1a	0		0	AK9	protein_coding
ENSG00000197381	hsa-miR-320c	ENSG00000197381|ENST00000348831	146	-12.08	2	11	1032	1051	9	0.8889	1	ENSG00000197381|ENST00000348831	hsa-miR-320c	0	24	31	24	31	12067	8mer-1a	x	8mer-1a	0		0	ADARB1	protein_coding
ENSG00000197381	hsa-miR-320d	ENSG00000197381|ENST00000348831	146	-12.08	2	11	1033	1051	9	0.8889	1	ENSG00000197381|ENST00000348831	hsa-miR-320d	0	24	31	24	31	12068	8mer-1a	x	8mer-1a	0		0	ADARB1	protein_coding
ENSG00000156113	hsa-miR-7847-3p	ENSG00000156113|ENST00000354353	143	-19.57	2	20	1814	1834	18	0.6111	0.6667	ENSG00000156113|ENST00000354353	hsa-miR-7847-3p	0	29	35	29	35	12075	7mer-1a	x	7mer-1a	0		0	KCNMA1	protein_coding
ENSG00000116698	hsa-miR-7847-3p	ENSG00000116698|ENST00000347615	151	-26.01	2	18	1152	1171	16	0.75	0.8125	ENSG00000116698|ENST00000347615	hsa-miR-7847-3p	0	24	29	24	29	12086	6mer	x	6mer	0		0	SMG7	protein_coding
ENSG00000142330	hsa-miR-130a-3p	ENSG00000142330|ENST00000357048	148	-18.86	2	13	280	301	11	0.8182	0.9091	ENSG00000142330|ENST00000357048	hsa-miR-130a-3p	0	31	36	31	36	12091	6mer	x	6mer	0		0	CAPN10	protein_coding
ENSG00000142330	hsa-miR-148a-3p	ENSG00000142330|ENST00000357048	140	-15.95	2	9	281	302	7	1	1	ENSG00000142330|ENST00000357048	hsa-miR-148a-3p	0	31	38	31	38	12092	8mer-1a	x	8mer-1a	0		0	CAPN10	protein_coding
ENSG00000142330	hsa-miR-148b-3p	ENSG00000142330|ENST00000357048	140	-15.7	2	9	281	302	7	1	1	ENSG00000142330|ENST00000357048	hsa-miR-148b-3p	0	31	38	31	38	12093	8mer-1a	x	8mer-1a	0		0	CAPN10	protein_coding
ENSG00000178761	hsa-miR-339-5p	ENSG00000178761|ENST00000357635	159	-24.52	2	22	1344	1365	20	0.7	0.8	ENSG00000178761|ENST00000357635	hsa-miR-339-5p	0	50	55	50	55	12134	6mer	x	6mer	0		0	FAM219B	protein_coding
ENSG00000116604	hsa-miR-199a-5p	ENSG00000116604|ENST00000360595	160	-24.7	2	20	1055	1075	18	0.7778	0.8333	ENSG00000116604|ENST00000360595	hsa-miR-199a-5p	0	18	25	18	25	12138	8mer-1a	x	8mer-1a	0		0	MEF2D	protein_coding
ENSG00000141644	hsa-miR-142-5p	ENSG00000141644|ENST00000353909	150	-8.46	2	15	825	845	13	0.7692	0.8462	ENSG00000141644|ENST00000353909	hsa-miR-142-5p	0	38	43	38	43	12143	6mer	x	6mer	0		0	MBD1	protein_coding
ENSG00000055609	hsa-miR-15a-5p	ENSG00000055609|ENST00000360104	152	-17.73	2	20	2657	2676	18	0.7222	0.7778	ENSG00000055609|ENST00000360104	hsa-miR-15a-5p	0	42	49	42	49	12147	8mer-1a	x	8mer-1a	0		0	KMT2C	protein_coding
ENSG00000055609	hsa-miR-15b-5p	ENSG00000055609|ENST00000360104	152	-18.11	2	20	2657	2676	18	0.7222	0.7778	ENSG00000055609|ENST00000360104	hsa-miR-15b-5p	0	42	49	42	49	12148	8mer-1a	x	8mer-1a	0		0	KMT2C	protein_coding
ENSG00000163605	hsa-miR-181a-5p	ENSG00000163605|ENST00000356692	153	-12.62	2	18	2120	2142	16	0.6875	0.8125	ENSG00000163605|ENST00000356692	hsa-miR-181a-5p	0	38	45	38	45	12152	8mer-1a	x	8mer-1a	0		0	PPP4R2	protein_coding
ENSG00000163605	hsa-miR-181b-5p	ENSG00000163605|ENST00000356692	154	-16.4	2	22	853	875	21	0.619	0.8571	ENSG00000163605|ENST00000356692	hsa-miR-181b-5p	0	38	45	38	45	12153	8mer-1a	x	8mer-1a	0		0	PPP4R2	protein_coding
ENSG00000118495	hsa-miR-128-3p	ENSG00000118495|ENST00000360537	145	-13.11	2	10	683	703	8	1	1	ENSG00000118495|ENST00000360537	hsa-miR-128-3p	0	37	43	37	43	12154	7mer-m8	x	7mer-m8	0		0	PLAGL1	protein_coding
ENSG00000125875	hsa-miR-27a-3p	ENSG00000125875|ENST00000354200	150	-16.19	2	20	2509	2530	19	0.6842	0.7368	ENSG00000125875|ENST00000354200	hsa-miR-27a-3p	0	33	39	33	39	12162	7mer-1a	x	7mer-1a	0		0	TBC1D20	protein_coding
ENSG00000125875	hsa-miR-27b-3p	ENSG00000125875|ENST00000354200	148	-19.25	2	13	2510	2530	11	0.8182	0.9091	ENSG00000125875|ENST00000354200	hsa-miR-27b-3p	0	33	39	33	39	12163	7mer-1a	x	7mer-1a	0		0	TBC1D20	protein_coding
ENSG00000196814	hsa-miR-335-5p	ENSG00000196814|ENST00000361171	143	-13.64	2	15	1176	1196	13	0.7692	0.8462	ENSG00000196814|ENST00000361171	hsa-miR-335-5p	0	43	48	43	48	12218	6mer	x	6mer	0		0	MVB12B	protein_coding
ENSG00000068028	hsa-miR-181a-5p	ENSG00000068028|ENST00000359365	151	-15.82	2	22	658	679	20	0.65	0.75	ENSG00000068028|ENST00000359365	hsa-miR-181a-5p	0	42	48	42	48	12230	7mer-m8	x	7mer-m8	0		0	RASSF1	protein_coding
ENSG00000068028	hsa-miR-181b-5p	ENSG00000068028|ENST00000359365	151	-12.19	2	22	574	595	20	0.65	0.75	ENSG00000068028|ENST00000359365	hsa-miR-181b-5p	0	42	48	42	48	12231	7mer-m8	x	7mer-m8	0		0	RASSF1	protein_coding
ENSG00000160075	hsa-miR-128-3p	ENSG00000160075|ENST00000359060	147	-16.75	2	20	673	692	19	0.7368	0.7368	ENSG00000160075|ENST00000359060	hsa-miR-128-3p	0	15	21	15	21	12232	7mer-m8	x	7mer-m8	0		0	SSU72	protein_coding
ENSG00000152092	hsa-miR-148a-3p	ENSG00000152092|ENST00000361833	153	-16.35	2	21	1622	1641	19	0.7368	0.7368	ENSG00000152092|ENST00000361833	hsa-miR-148a-3p	0	36	42	36	42	12248	7mer-m8	x	7mer-m8	0		0	ASTN1	protein_coding
ENSG00000152092	hsa-miR-148b-3p	ENSG00000152092|ENST00000361833	149	-14.8	2	21	1622	1641	19	0.6842	0.7368	ENSG00000152092|ENST00000361833	hsa-miR-148b-3p	0	36	42	36	42	12249	7mer-m8	x	7mer-m8	0		0	ASTN1	protein_coding
ENSG00000197063	hsa-miR-27a-3p	ENSG00000197063|ENST00000357736	140	-12.26	2	9	3729	3749	7	1	1	ENSG00000197063|ENST00000357736	hsa-miR-27a-3p	0	42	48	42	48	12267	7mer-1a	x	7mer-1a	0		0	MAFG	protein_coding
ENSG00000197063	hsa-miR-27b-3p	ENSG00000197063|ENST00000357736	140	-11.25	2	9	3729	3749	7	1	1	ENSG00000197063|ENST00000357736	hsa-miR-27b-3p	0	42	48	42	48	12268	7mer-1a	x	7mer-1a	0		0	MAFG	protein_coding
ENSG00000213066	hsa-miR-128-3p	ENSG00000213066|ENST00000366847	161	-23.31	2	20	1861	1883	20	0.75	0.85	ENSG00000213066|ENST00000366847	hsa-miR-128-3p	0	19	24	19	24	12280	6mer	x	6mer	0		0	CEP43	protein_coding
ENSG00000213066	hsa-miR-744-5p	ENSG00000213066|ENST00000366847	164	-28.24	2	21	7716	7737	19	0.7368	0.7895	ENSG00000213066|ENST00000366847	hsa-miR-744-5p	0	49	54	49	54	12281	6mer	x	6mer	0		0	CEP43	protein_coding
ENSG00000072422	hsa-miR-30a-3p	ENSG00000072422|ENST00000357917	151	-12.2	2	20	501	522	18	0.6667	0.7222	ENSG00000072422|ENST00000357917	hsa-miR-30a-3p	0	18	23	18	23	12282	6mer	x	6mer	0		0	RHOBTB1	protein_coding
ENSG00000072422	hsa-miR-30e-3p	ENSG00000072422|ENST00000357917	151	-10.16	2	20	501	522	18	0.6667	0.7222	ENSG00000072422|ENST00000357917	hsa-miR-30e-3p	0	18	23	18	23	12283	6mer	x	6mer	0		0	RHOBTB1	protein_coding
ENSG00000074047	hsa-miR-27a-3p	ENSG00000074047|ENST00000361492	144	-13.48	2	20	1432	1450	18	0.6667	0.7222	ENSG00000074047|ENST00000361492	hsa-miR-27a-3p	0	38	43	38	43	12288	6mer	x	6mer	0		0	GLI2	protein_coding
ENSG00000074047	hsa-miR-27b-3p	ENSG00000074047|ENST00000361492	146	-15.61	2	20	1427	1450	21	0.5714	0.7619	ENSG00000074047|ENST00000361492	hsa-miR-27b-3p	0	38	43	38	43	12289	6mer	x	6mer	0		0	GLI2	protein_coding
ENSG00000136695	hsa-miR-30a-5p	ENSG00000136695|ENST00000346807	142	-15.44	2	20	1669	1691	19	0.6316	0.6842	ENSG00000136695|ENST00000346807	hsa-miR-30a-5p	0	46	52	46	52	12305	7mer-1a	x	7mer-1a	0		0	IL36RN	protein_coding
ENSG00000136695	hsa-miR-30b-5p	ENSG00000136695|ENST00000346807	141	-12	2	10	1670	1691	8	0.875	1	ENSG00000136695|ENST00000346807	hsa-miR-30b-5p	0	46	52	46	52	12306	7mer-1a	x	7mer-1a	0		0	IL36RN	protein_coding
ENSG00000136695	hsa-miR-30c-5p	ENSG00000136695|ENST00000346807	141	-10.91	2	10	1669	1691	8	0.875	1	ENSG00000136695|ENST00000346807	hsa-miR-30c-5p	0	46	52	46	52	12307	7mer-1a	x	7mer-1a	0		0	IL36RN	protein_coding
ENSG00000136695	hsa-miR-30d-5p	ENSG00000136695|ENST00000346807	142	-15.44	2	20	1669	1691	19	0.6316	0.6842	ENSG00000136695|ENST00000346807	hsa-miR-30d-5p	0	46	52	46	52	12308	7mer-1a	x	7mer-1a	0		0	IL36RN	protein_coding
ENSG00000153707	hsa-miR-15a-5p	ENSG00000153707|ENST00000355233	163	-19.81	2	21	863	885	20	0.75	0.8	ENSG00000153707|ENST00000355233	hsa-miR-15a-5p	0	39	44	39	44	12309	6mer	x	6mer	0		0	PTPRD	protein_coding
ENSG00000153707	hsa-miR-15b-5p	ENSG00000153707|ENST00000355233	158	-13.46	2	20	863	885	19	0.7368	0.7895	ENSG00000153707|ENST00000355233	hsa-miR-15b-5p	0	39	44	39	44	12310	6mer	x	6mer	0		0	PTPRD	protein_coding
ENSG00000164488	hsa-miR-15a-5p	ENSG00000164488|ENST00000366795	141	-14.08	2	17	258	277	15	0.7333	0.7333	ENSG00000164488|ENST00000366795	hsa-miR-15a-5p	0	46	52	46	52	12321	7mer-m8	x	7mer-m8	0		0	DACT2	protein_coding
ENSG00000164488	hsa-miR-15b-5p	ENSG00000164488|ENST00000366795	149	-15.17	2	17	258	277	15	0.8	0.8	ENSG00000164488|ENST00000366795	hsa-miR-15b-5p	0	46	52	46	52	12322	7mer-m8	x	7mer-m8	0		0	DACT2	protein_coding
ENSG00000099954	hsa-miR-26a-5p	ENSG00000099954|ENST00000355219	152	-14.36	2	21	312	333	19	0.6842	0.6842	ENSG00000099954|ENST00000355219	hsa-miR-26a-5p	0	31	37	31	37	12325	7mer-1a	x	7mer-1a	0		0	CECR2	protein_coding
ENSG00000198168	hsa-miR-181a-5p	ENSG00000198168|ENST00000354193	151	-16.8	2	18	857	882	19	0.7368	0.7895	ENSG00000198168|ENST00000354193	hsa-miR-181a-5p	0	28	34	28	34	12336	7mer-m8	x	7mer-m8	0		0	SVIP	protein_coding
ENSG00000198168	hsa-miR-181b-5p	ENSG00000198168|ENST00000354193	156	-18.08	2	18	857	882	19	0.7368	0.7895	ENSG00000198168|ENST00000354193	hsa-miR-181b-5p	0	28	34	28	34	12338	7mer-m8	x	7mer-m8	0		0	SVIP	protein_coding
ENSG00000197622	hsa-miR-664a-5p	ENSG00000197622|ENST00000357235	145	-14.35	2	23	218	242	22	0.5909	0.6818	ENSG00000197622|ENST00000357235	hsa-miR-664a-5p	0	26	31	26	31	12349	6mer	x	6mer	0		0	CDC42SE1	protein_coding
ENSG00000196090	hsa-miR-224-5p	ENSG00000196090|ENST00000356100	158	-20.21	2	20	1374	1399	19	0.7368	0.7895	ENSG00000196090|ENST00000356100	hsa-miR-224-5p	0	23	30	23	30	12350	8mer-1a	x	8mer-1a	0		0	PTPRT	protein_coding
ENSG00000183814	hsa-miR-126-5p	ENSG00000183814|ENST00000366808	140	-4.62	2	9	585	605	7	1	1	ENSG00000183814|ENST00000366808	hsa-miR-126-5p	0	46	52	46	52	12375	7mer-m8	x	7mer-m8	0		0	LIN9	protein_coding
ENSG00000183814	hsa-miR-382-5p	ENSG00000183814|ENST00000366808	149	-12.05	2	20	804	824	18	0.5556	0.8889	ENSG00000183814|ENST00000366808	hsa-miR-382-5p	0	30	35	30	35	12376	6mer	x	6mer	0		0	LIN9	protein_coding
ENSG00000288674	hsa-miR-7847-3p	ENSG00000288674|ENST00000366779	140	-19.47	2	9	4980	5000	7	1	1	ENSG00000288674|ENST00000366779	hsa-miR-7847-3p	0	24	30	24	30	12402	7mer-1a	x	7mer-1a	0		0	AL391628.1	protein_coding
ENSG00000120784	hsa-miR-199a-3p	ENSG00000120784|ENST00000351218	140	-11.87	2	9	2119	2140	7	1	1	ENSG00000120784|ENST00000351218	hsa-miR-199a-3p	0	36	41	36	41	12407	6mer	x	6mer	0		0	ZFP30	protein_coding
ENSG00000120784	hsa-miR-199b-3p	ENSG00000120784|ENST00000351218	140	-11.87	2	9	2119	2140	7	1	1	ENSG00000120784|ENST00000351218	hsa-miR-199b-3p	0	36	41	36	41	12408	6mer	x	6mer	0		0	ZFP30	protein_coding
ENSG00000092531	hsa-miR-15a-5p	ENSG00000092531|ENST00000349777	140	-14.53	2	9	162	183	7	1	1	ENSG00000092531|ENST00000349777	hsa-miR-15a-5p	0	50	55	50	55	12423	6mer	x	6mer	0		0	SNAP23	protein_coding
ENSG00000092531	hsa-miR-15b-5p	ENSG00000092531|ENST00000349777	140	-14.92	2	9	162	183	7	1	1	ENSG00000092531|ENST00000349777	hsa-miR-15b-5p	0	50	55	50	55	12424	6mer	x	6mer	0		0	SNAP23	protein_coding
ENSG00000198399	hsa-miR-361-3p	ENSG00000198399|ENST00000355123	153	-22.16	2	20	104	129	21	0.7143	0.7619	ENSG00000198399|ENST00000355123	hsa-miR-361-3p	0	53	60	53	60	12428	8mer-1a	x	8mer-1a	0		0	ITSN2	protein_coding
ENSG00000160087	hsa-miR-361-3p	ENSG00000160087|ENST00000347370	151	-22.94	2	21	719	742	20	0.6	0.8	ENSG00000160087|ENST00000347370	hsa-miR-361-3p	0	54	60	54	60	12430	7mer-m8	x	7mer-m8	0		0	UBE2J2	protein_coding
ENSG00000143149	hsa-miR-181a-5p	ENSG00000143149|ENST00000354775	147	-13.92	2	22	630	651	20	0.65	0.7	ENSG00000143149|ENST00000354775	hsa-miR-181a-5p	0	21	27	21	27	12431	7mer-m8	x	7mer-m8	0		0	ALDH9A1	protein_coding
ENSG00000143149	hsa-miR-181b-5p	ENSG00000143149|ENST00000354775	158	-19.43	2	21	61	86	22	0.7273	0.7727	ENSG00000143149|ENST00000354775	hsa-miR-181b-5p	0	21	27	21	27	12432	7mer-m8	x	7mer-m8	0		0	ALDH9A1	protein_coding
ENSG00000102908	hsa-miR-15a-5p	ENSG00000102908|ENST00000349945	146	-15.42	2	21	146	163	19	0.7368	0.7368	ENSG00000102908|ENST00000349945	hsa-miR-15a-5p	0	46	52	46	52	12440	7mer-m8	x	7mer-m8	0		0	NFAT5	protein_coding
ENSG00000102908	hsa-miR-15b-5p	ENSG00000102908|ENST00000349945	142	-12.8	2	11	142	163	9	0.8889	0.8889	ENSG00000102908|ENST00000349945	hsa-miR-15b-5p	0	46	52	46	52	12441	7mer-m8	x	7mer-m8	0		0	NFAT5	protein_coding
ENSG00000166908	hsa-miR-126-5p	ENSG00000166908|ENST00000354947	145	-5.36	2	20	1768	1787	18	0.6111	0.7778	ENSG00000166908|ENST00000354947	hsa-miR-126-5p	0	17	22	17	22	12444	6mer	x	6mer	0		0	PIP4K2C	protein_coding
ENSG00000143702	hsa-miR-130a-3p	ENSG00000143702|ENST00000366543	153	-10.55	2	18	612	633	16	0.75	0.75	ENSG00000143702|ENST00000366543	hsa-miR-130a-3p	0	36	41	36	41	12448	6mer	x	6mer	0		0	CEP170	protein_coding
ENSG00000119185	hsa-miR-30a-5p	ENSG00000119185|ENST00000360635	140	-7.12	2	9	1845	1866	7	1	1	ENSG00000119185|ENST00000360635	hsa-miR-30a-5p	0	23	29	23	29	12460	7mer-m8	x	7mer-m8	0		0	ITGB1BP1	protein_coding
ENSG00000119185	hsa-miR-30b-5p	ENSG00000119185|ENST00000360635	140	-5.37	2	9	1845	1866	7	1	1	ENSG00000119185|ENST00000360635	hsa-miR-30b-5p	0	23	29	23	29	12461	7mer-m8	x	7mer-m8	0		0	ITGB1BP1	protein_coding
ENSG00000119185	hsa-miR-30c-5p	ENSG00000119185|ENST00000360635	140	-6.23	2	9	1844	1866	7	1	1	ENSG00000119185|ENST00000360635	hsa-miR-30c-5p	0	23	29	23	29	12462	7mer-m8	x	7mer-m8	0		0	ITGB1BP1	protein_coding
ENSG00000119185	hsa-miR-30d-5p	ENSG00000119185|ENST00000360635	140	-6.78	2	9	1845	1866	7	1	1	ENSG00000119185|ENST00000360635	hsa-miR-30d-5p	0	23	29	23	29	12463	7mer-m8	x	7mer-m8	0		0	ITGB1BP1	protein_coding
ENSG00000143674	hsa-miR-146a-5p	ENSG00000143674|ENST00000366622	150	-17.41	2	18	594	618	19	0.7895	0.7895	ENSG00000143674|ENST00000366622	hsa-miR-146a-5p	0	29	35	29	35	12475	7mer-m8	x	7mer-m8	0		0	MAP3K21	protein_coding
ENSG00000143674	hsa-miR-146b-5p	ENSG00000143674|ENST00000366622	157	-17.11	2	22	599	618	20	0.75	0.75	ENSG00000143674|ENST00000366622	hsa-miR-146b-5p	0	29	35	29	35	12476	7mer-m8	x	7mer-m8	0		0	MAP3K21	protein_coding
ENSG00000078018	hsa-miR-151a-3p	ENSG00000078018|ENST00000360351	143	-15.84	2	16	1531	1551	14	0.7143	0.7143	ENSG00000078018|ENST00000360351	hsa-miR-151a-3p	0	45	51	45	51	12520	7mer-m8	x	7mer-m8	0		0	MAP2	protein_coding
ENSG00000004660	hsa-miR-339-5p	ENSG00000004660|ENST00000348335	162	-29.63	2	18	514	536	17	0.8824	0.8824	ENSG00000004660|ENST00000348335	hsa-miR-339-5p	0	51	56	51	56	12559	6mer	x	6mer	0		0	CAMKK1	protein_coding
ENSG00000004660	hsa-miR-7847-3p	ENSG00000004660|ENST00000348335	154	-24	2	19	131	151	17	0.7059	0.7647	ENSG00000004660|ENST00000348335	hsa-miR-7847-3p	0	47	53	47	53	12560	7mer-1a	x	7mer-1a	0		0	CAMKK1	protein_coding
ENSG00000168243	hsa-miR-7847-3p	ENSG00000168243|ENST00000366598	156	-27.42	2	20	613	637	22	0.7727	0.7727	ENSG00000168243|ENST00000366598	hsa-miR-7847-3p	0	21	26	21	26	12569	6mer	x	6mer	0		0	GNG4	protein_coding
ENSG00000148737	hsa-miR-181a-5p	ENSG00000148737|ENST00000355995	151	-11.85	2	22	1524	1545	20	0.6	0.8	ENSG00000148737|ENST00000355995	hsa-miR-181a-5p	0	55	60	55	60	12582	6mer	x	6mer	0		0	TCF7L2	protein_coding
ENSG00000148737	hsa-miR-181b-5p	ENSG00000148737|ENST00000355995	141	-11.76	2	18	1523	1545	16	0.625	0.6875	ENSG00000148737|ENST00000355995	hsa-miR-181b-5p	0	55	60	55	60	12583	6mer	x	6mer	0		0	TCF7L2	protein_coding
ENSG00000196557	hsa-miR-224-5p	ENSG00000196557|ENST00000348261	148	-23.54	2	24	65	96	29	0.5862	0.7241	ENSG00000196557|ENST00000348261	hsa-miR-224-5p	0	51	56	51	56	12590	6mer	x	6mer	0		0	CACNA1H	protein_coding
ENSG00000035115	hsa-miR-142-5p	ENSG00000035115|ENST00000356150	150	-7.05	2	20	178	199	19	0.6842	0.7368	ENSG00000035115|ENST00000356150	hsa-miR-142-5p	0	38	44	38	44	12591	7mer-1a	x	7mer-1a	0		0	SH3YL1	protein_coding
ENSG00000163349	hsa-miR-142-5p	ENSG00000163349|ENST00000361587	157	-9.88	2	14	3900	3920	12	0.9167	0.9167	ENSG00000163349|ENST00000361587	hsa-miR-142-5p	0	37	42	37	42	12599	6mer	x	6mer	0		0	HIPK1	protein_coding
ENSG00000087470	hsa-miR-130a-3p	ENSG00000087470|ENST00000358214	141	-11.89	2	11	622	644	10	0.9	0.9	ENSG00000087470|ENST00000358214	hsa-miR-130a-3p	0	43	48	43	48	12602	6mer	x	6mer	0		0	DNM1L	protein_coding
ENSG00000075407	hsa-miR-361-3p	ENSG00000075407|ENST00000351773	165	-31.19	2	19	1843	1866	18	0.7778	0.8889	ENSG00000075407|ENST00000351773	hsa-miR-361-3p	0	43	49	43	49	12623	7mer-m8	x	7mer-m8	0		0	ZNF37A	protein_coding
ENSG00000196361	hsa-miR-361-3p	ENSG00000196361|ENST00000359227	151	-25.27	2	14	2658	2679	12	0.9167	0.9167	ENSG00000196361|ENST00000359227	hsa-miR-361-3p	0	46	53	46	53	12625	8mer-1a	x	8mer-1a	0		0	ELAVL3	protein_coding
ENSG00000196937	hsa-miR-181a-5p	ENSG00000196937|ENST00000359943	140	-11.31	2	9	1356	1378	7	1	1	ENSG00000196937|ENST00000359943	hsa-miR-181a-5p	0	23	30	23	30	12671	8mer-1a	x	8mer-1a	0		0	FAM3C	protein_coding
ENSG00000196937	hsa-miR-181b-5p	ENSG00000196937|ENST00000359943	147	-10.75	2	22	1357	1378	20	0.65	0.7	ENSG00000196937|ENST00000359943	hsa-miR-181b-5p	0	23	30	23	30	12672	8mer-1a	x	8mer-1a	0		0	FAM3C	protein_coding
ENSG00000185774	hsa-miR-30a-3p	ENSG00000185774|ENST00000359001	154	-11.32	2	21	1364	1387	21	0.7143	0.7619	ENSG00000185774|ENST00000359001	hsa-miR-30a-3p	0	37	43	37	43	12675	7mer-1a	x	7mer-1a	0		0	KCNIP4	protein_coding
ENSG00000185774	hsa-miR-30e-3p	ENSG00000185774|ENST00000359001	152	-8.77	2	19	1367	1387	17	0.7059	0.8235	ENSG00000185774|ENST00000359001	hsa-miR-30e-3p	0	37	43	37	43	12676	7mer-1a	x	7mer-1a	0		0	KCNIP4	protein_coding
ENSG00000172901	hsa-miR-134-5p	ENSG00000172901|ENST00000357872	145	-16.79	2	18	96	117	16	0.625	0.75	ENSG00000172901|ENST00000357872	hsa-miR-134-5p	0	32	37	32	37	12678	6mer	x	6mer	0		0	LVRN	protein_coding
ENSG00000196950	hsa-miR-23a-3p	ENSG00000196950|ENST00000359634	158	-19.57	2	20	2439	2462	21	0.7143	0.7619	ENSG00000196950|ENST00000359634	hsa-miR-23a-3p	0	18	25	18	25	12687	8mer-1a	x	8mer-1a	0		0	SLC39A10	protein_coding
ENSG00000196950	hsa-miR-23b-3p	ENSG00000196950|ENST00000359634	153	-19.23	2	19	2437	2462	20	0.7	0.75	ENSG00000196950|ENST00000359634	hsa-miR-23b-3p	0	18	25	18	25	12688	8mer-1a	x	8mer-1a	0		0	SLC39A10	protein_coding
ENSG00000196950	hsa-miR-23c	ENSG00000196950|ENST00000359634	161	-21.18	2	19	2438	2462	20	0.75	0.8	ENSG00000196950|ENST00000359634	hsa-miR-23c	0	18	25	18	25	12689	8mer-1a	x	8mer-1a	0		0	SLC39A10	protein_coding
ENSG00000077279	hsa-miR-126-5p	ENSG00000077279|ENST00000358070	155	-6.2	2	17	6013	6034	16	0.75	0.875	ENSG00000077279|ENST00000358070	hsa-miR-126-5p	0	49	54	49	54	12711	6mer	x	6mer	0		0	DCX	protein_coding
ENSG00000125740	hsa-miR-27a-3p	ENSG00000125740|ENST00000353609	152	-15.45	2	20	872	890	18	0.6667	0.8333	ENSG00000125740|ENST00000353609	hsa-miR-27a-3p	0	22	29	22	29	12725	8mer-1a	x	8mer-1a	0		0	FOSB	protein_coding
ENSG00000125740	hsa-miR-27b-3p	ENSG00000125740|ENST00000353609	151	-16.08	2	20	871	890	19	0.6842	0.8421	ENSG00000125740|ENST00000353609	hsa-miR-27b-3p	0	22	29	22	29	12726	8mer-1a	x	8mer-1a	0		0	FOSB	protein_coding
ENSG00000065183	hsa-miR-30a-3p	ENSG00000065183|ENST00000349139	155	-13.53	2	16	5560	5581	14	0.7857	0.8571	ENSG00000065183|ENST00000349139	hsa-miR-30a-3p	0	32	38	32	38	12729	7mer-1a	x	7mer-1a	0		0	WDR3	protein_coding
ENSG00000065183	hsa-miR-30e-3p	ENSG00000065183|ENST00000349139	159	-14.32	2	20	5560	5581	18	0.7222	0.7778	ENSG00000065183|ENST00000349139	hsa-miR-30e-3p	0	32	38	32	38	12730	7mer-1a	x	7mer-1a	0		0	WDR3	protein_coding
ENSG00000144355	hsa-miR-320c	ENSG00000144355|ENST00000361725	151	-21.69	2	19	287	307	19	0.7368	0.7895	ENSG00000144355|ENST00000361725	hsa-miR-320c	0	49	56	49	56	12731	8mer-1a	x	8mer-1a	0		0	DLX1	protein_coding
ENSG00000144355	hsa-miR-320d	ENSG00000144355|ENST00000361725	148	-18.14	2	14	287	307	14	0.7857	0.8571	ENSG00000144355|ENST00000361725	hsa-miR-320d	0	49	56	49	56	12732	8mer-1a	x	8mer-1a	0		0	DLX1	protein_coding
ENSG00000166401	hsa-miR-30a-3p	ENSG00000166401|ENST00000353706	149	-23.07	2	20	1517	1545	25	0.68	0.68	ENSG00000166401|ENST00000353706	hsa-miR-30a-3p	0	27	33	27	33	12742	7mer-m8	x	7mer-m8	0		0	SERPINB8	protein_coding
ENSG00000166401	hsa-miR-30e-3p	ENSG00000166401|ENST00000353706	149	-16.87	2	19	1523	1545	18	0.7222	0.7222	ENSG00000166401|ENST00000353706	hsa-miR-30e-3p	0	27	33	27	33	12743	7mer-m8	x	7mer-m8	0		0	SERPINB8	protein_coding
ENSG00000075407	hsa-miR-320c	ENSG00000075407|ENST00000361085	152	-15.51	2	19	6455	6473	17	0.7647	0.7647	ENSG00000075407|ENST00000361085	hsa-miR-320c	0	50	55	50	55	12761	6mer	x	6mer	0		0	ZNF37A	protein_coding
ENSG00000075407	hsa-miR-320d	ENSG00000075407|ENST00000361085	147	-15.64	2	18	6456	6473	16	0.75	0.75	ENSG00000075407|ENST00000361085	hsa-miR-320d	0	50	55	50	55	12762	6mer	x	6mer	0		0	ZNF37A	protein_coding
ENSG00000137501	hsa-miR-15a-5p	ENSG00000137501|ENST00000354566	154	-14.13	2	20	237	259	19	0.6842	0.7895	ENSG00000137501|ENST00000354566	hsa-miR-15a-5p	0	41	46	41	46	12763	6mer	x	6mer	0		0	SYTL2	protein_coding
ENSG00000137501	hsa-miR-15b-5p	ENSG00000137501|ENST00000354566	146	-12.47	2	20	237	259	19	0.6316	0.7368	ENSG00000137501|ENST00000354566	hsa-miR-15b-5p	0	41	46	41	46	12764	6mer	x	6mer	0		0	SYTL2	protein_coding
ENSG00000169783	hsa-miR-15a-5p	ENSG00000169783|ENST00000355300	142	-15.82	2	11	824	845	9	0.8889	0.8889	ENSG00000169783|ENST00000355300	hsa-miR-15a-5p	0	38	43	38	43	12771	6mer	x	6mer	0		0	LINGO1	protein_coding
ENSG00000169783	hsa-miR-15b-5p	ENSG00000169783|ENST00000355300	152	-13.6	2	21	824	845	19	0.6316	0.7368	ENSG00000169783|ENST00000355300	hsa-miR-15b-5p	0	38	43	38	43	12772	6mer	x	6mer	0		0	LINGO1	protein_coding
ENSG00000144061	hsa-miR-7847-3p	ENSG00000144061|ENST00000355301	145	-20.26	2	10	33	53	8	1	1	ENSG00000144061|ENST00000355301	hsa-miR-7847-3p	0	52	57	52	57	12818	6mer	x	6mer	0		0	NPHP1	protein_coding
ENSG00000173258	hsa-miR-150-5p	ENSG00000173258|ENST00000355824	142	-18.98	2	21	177	202	23	0.6522	0.6522	ENSG00000173258|ENST00000355824	hsa-miR-150-5p	0	45	50	45	50	12834	6mer	x	6mer	0		0	ZNF483	protein_coding
ENSG00000159307	hsa-miR-7847-3p	ENSG00000159307|ENST00000360835	152	-18.13	2	19	43	62	17	0.7647	0.7647	ENSG00000159307|ENST00000360835	hsa-miR-7847-3p	0	34	39	34	39	12860	6mer	x	6mer	0		0	SCUBE1	protein_coding
ENSG00000135655	hsa-miR-30a-3p	ENSG00000135655|ENST00000353364	145	-12.79	2	10	3739	3760	8	1	1	ENSG00000135655|ENST00000353364	hsa-miR-30a-3p	0	38	43	38	43	12876	6mer	x	6mer	0		0	USP15	protein_coding
ENSG00000135655	hsa-miR-30e-3p	ENSG00000135655|ENST00000353364	149	-12.62	2	19	3738	3760	18	0.6667	0.7778	ENSG00000135655|ENST00000353364	hsa-miR-30e-3p	0	38	43	38	43	12877	6mer	x	6mer	0		0	USP15	protein_coding
ENSG00000109618	hsa-miR-27a-3p	ENSG00000109618|ENST00000358971	143	-17.74	2	20	1022	1042	18	0.6111	0.6667	ENSG00000109618|ENST00000358971	hsa-miR-27a-3p	0	45	51	45	51	12879	7mer-1a	x	7mer-1a	0		0	SEPSECS	protein_coding
ENSG00000109618	hsa-miR-27b-3p	ENSG00000109618|ENST00000358971	140	-13.73	2	9	1022	1042	7	1	1	ENSG00000109618|ENST00000358971	hsa-miR-27b-3p	0	45	51	45	51	12880	7mer-1a	x	7mer-1a	0		0	SEPSECS	protein_coding
ENSG00000109618	hsa-miR-30a-5p	ENSG00000109618|ENST00000358971	149	-16.15	2	14	2601	2622	12	0.8333	0.8333	ENSG00000109618|ENST00000358971	hsa-miR-30a-5p	0	19	24	19	24	12881	6mer	x	6mer	0		0	SEPSECS	protein_coding
ENSG00000109618	hsa-miR-30b-5p	ENSG00000109618|ENST00000358971	151	-15.02	2	20	2601	2622	18	0.6667	0.7222	ENSG00000109618|ENST00000358971	hsa-miR-30b-5p	0	19	24	19	24	12882	6mer	x	6mer	0		0	SEPSECS	protein_coding
ENSG00000109618	hsa-miR-30c-5p	ENSG00000109618|ENST00000358971	149	-15.99	2	20	2601	2622	18	0.6667	0.7778	ENSG00000109618|ENST00000358971	hsa-miR-30c-5p	0	19	24	19	24	12883	6mer	x	6mer	0		0	SEPSECS	protein_coding
ENSG00000109618	hsa-miR-30d-5p	ENSG00000109618|ENST00000358971	145	-19.22	2	10	2601	2622	8	1	1	ENSG00000109618|ENST00000358971	hsa-miR-30d-5p	0	19	24	19	24	12884	6mer	x	6mer	0		0	SEPSECS	protein_coding
ENSG00000185666	hsa-miR-155-5p	ENSG00000185666|ENST00000358763	150	-13.16	2	23	677	700	21	0.619	0.6667	ENSG00000185666|ENST00000358763	hsa-miR-155-5p	0	39	45	39	45	12888	7mer-m8	x	7mer-m8	0		0	SYN3	protein_coding
ENSG00000143420	hsa-miR-361-3p	ENSG00000143420|ENST00000361532	153	-20.18	2	22	240	261	21	0.7143	0.7619	ENSG00000143420|ENST00000361532	hsa-miR-361-3p	0	37	42	37	42	12904	6mer	x	6mer	0		0	ENSA	protein_coding
ENSG00000172260	hsa-miR-24-3p	ENSG00000172260|ENST00000357731	154	-21.69	2	20	10429	10452	20	0.7	0.75	ENSG00000172260|ENST00000357731	hsa-miR-24-3p	0	30	36	30	36	12909	7mer-m8	x	7mer-m8	0		0	NEGR1	protein_coding
ENSG00000142864	hsa-miR-15a-5p	ENSG00000142864|ENST00000361219	154	-13.56	2	20	265	287	19	0.6842	0.7895	ENSG00000142864|ENST00000361219	hsa-miR-15a-5p	0	26	32	26	32	12915	7mer-m8	x	7mer-m8	0		0	SERBP1	protein_coding
ENSG00000142864	hsa-miR-15b-5p	ENSG00000142864|ENST00000361219	146	-12.49	2	20	265	287	19	0.6316	0.7368	ENSG00000142864|ENST00000361219	hsa-miR-15b-5p	0	26	32	26	32	12916	7mer-m8	x	7mer-m8	0		0	SERBP1	protein_coding
ENSG00000069424	hsa-miR-432-5p	ENSG00000069424|ENST00000352527	150	-22.56	2	20	255	278	19	0.6842	0.7368	ENSG00000069424|ENST00000352527	hsa-miR-432-5p	0	49	54	49	54	12944	6mer	x	6mer	0		0	KCNAB2	protein_coding
ENSG00000185811	hsa-miR-24-3p	ENSG00000185811|ENST00000357364	156	-25.99	2	17	1334	1355	15	0.7333	0.8667	ENSG00000185811|ENST00000357364	hsa-miR-24-3p	0	31	36	31	36	12986	6mer	x	6mer	0		0	IKZF1	protein_coding
ENSG00000188859	hsa-miR-24-3p	ENSG00000188859|ENST00000354422	140	-16.75	2	9	74	95	7	1	1	ENSG00000188859|ENST00000354422	hsa-miR-24-3p	0	48	54	48	54	13033	7mer-m8	x	7mer-m8	0		0	FAM78B	protein_coding
ENSG00000123178	hsa-miR-199a-5p	ENSG00000123178|ENST00000361840	156	-17.18	2	20	660	680	18	0.7778	0.7778	ENSG00000123178|ENST00000361840	hsa-miR-199a-5p	0	16	21	16	21	13034	6mer	x	6mer	0		0	SPRYD7	protein_coding
ENSG00000067048	hsa-miR-27a-3p	ENSG00000067048|ENST00000360160	149	-10.98	2	15	290	311	14	0.7857	0.8571	ENSG00000067048|ENST00000360160	hsa-miR-27a-3p	0	41	46	41	46	13049	6mer	x	6mer	0		0	DDX3Y	protein_coding
ENSG00000067048	hsa-miR-27b-3p	ENSG00000067048|ENST00000360160	149	-10.96	2	15	290	311	14	0.7857	0.8571	ENSG00000067048|ENST00000360160	hsa-miR-27b-3p	0	41	46	41	46	13050	6mer	x	6mer	0		0	DDX3Y	protein_coding
ENSG00000130311	hsa-miR-339-5p	ENSG00000130311|ENST00000359866	158	-20.75	2	20	1776	1799	19	0.6842	0.8421	ENSG00000130311|ENST00000359866	hsa-miR-339-5p	0	43	50	43	50	13088	8mer-1a	x	8mer-1a	0		0	DDA1	protein_coding
ENSG00000197183	hsa-miR-361-3p	ENSG00000197183|ENST00000359676	162	-26.79	2	21	4004	4025	19	0.6842	0.8947	ENSG00000197183|ENST00000359676	hsa-miR-361-3p	0	21	27	21	27	13090	7mer-m8	x	7mer-m8	0		0	NOL4L	protein_coding
ENSG00000137872	hsa-miR-26a-5p	ENSG00000137872|ENST00000358066	144	-13.02	2	21	308	329	19	0.5789	0.6842	ENSG00000137872|ENST00000358066	hsa-miR-26a-5p	0	43	48	43	48	13124	6mer	x	6mer	0		0	SEMA6D	protein_coding
ENSG00000115507	hsa-miR-425-3p	ENSG00000115507|ENST00000366671	154	-16.07	2	17	1475	1495	15	0.8	0.8667	ENSG00000115507|ENST00000366671	hsa-miR-425-3p	0	34	39	34	39	13155	6mer	x	6mer	0		0	OTX1	protein_coding
ENSG00000198887	hsa-miR-28-3p	ENSG00000198887|ENST00000361138	151	-14.09	2	21	994	1017	21	0.6667	0.7143	ENSG00000198887|ENST00000361138	hsa-miR-28-3p	0	44	49	44	49	13167	6mer	x	6mer	0		0	SMC5	protein_coding
ENSG00000162849	hsa-miR-15a-5p	ENSG00000162849|ENST00000366518	149	-16.84	2	21	3623	3645	21	0.6667	0.7619	ENSG00000162849|ENST00000366518	hsa-miR-15a-5p	0	50	56	50	56	13181	7mer-m8	x	7mer-m8	0		0	KIF26B	protein_coding
ENSG00000162849	hsa-miR-15b-5p	ENSG00000162849|ENST00000366518	146	-11.4	2	17	3625	3645	15	0.7333	0.8	ENSG00000162849|ENST00000366518	hsa-miR-15b-5p	0	50	56	50	56	13183	7mer-m8	x	7mer-m8	0		0	KIF26B	protein_coding
ENSG00000137693	hsa-miR-361-3p	ENSG00000137693|ENST00000345877	168	-28.19	2	22	2092	2115	21	0.7143	0.8571	ENSG00000137693|ENST00000345877	hsa-miR-361-3p	0	34	39	34	39	13192	6mer	x	6mer	0		0	YAP1	protein_coding
ENSG00000143776	hsa-miR-664a-5p	ENSG00000143776|ENST00000366767	176	-27.74	2	23	1273	1299	24	0.7917	0.8333	ENSG00000143776|ENST00000366767	hsa-miR-664a-5p	0	53	58	53	58	13200	6mer	x	6mer	0		0	CDC42BPA	protein_coding
ENSG00000198561	hsa-miR-15a-5p	ENSG00000198561|ENST00000361391	149	-16.25	2	21	683	706	22	0.6818	0.7273	ENSG00000198561|ENST00000361391	hsa-miR-15a-5p	0	53	60	53	60	13210	8mer-1a	x	8mer-1a	0		0	CTNND1	protein_coding
ENSG00000198561	hsa-miR-15b-5p	ENSG00000198561|ENST00000361391	148	-18.54	2	19	682	706	20	0.7	0.75	ENSG00000198561|ENST00000361391	hsa-miR-15b-5p	0	53	60	53	60	13211	8mer-1a	x	8mer-1a	0		0	CTNND1	protein_coding
ENSG00000196526	hsa-miR-27a-3p	ENSG00000196526|ENST00000360265	145	-21.84	2	19	4225	4248	20	0.55	0.8	ENSG00000196526|ENST00000360265	hsa-miR-27a-3p	0	32	37	32	37	13221	6mer	x	6mer	0		0	AFAP1	protein_coding
ENSG00000196526	hsa-miR-27b-3p	ENSG00000196526|ENST00000360265	145	-19.13	2	19	4225	4248	20	0.55	0.8	ENSG00000196526|ENST00000360265	hsa-miR-27b-3p	0	32	37	32	37	13222	6mer	x	6mer	0		0	AFAP1	protein_coding
ENSG00000198785	hsa-miR-15a-5p	ENSG00000198785|ENST00000361820	154	-20.62	2	21	3185	3211	24	0.7083	0.7083	ENSG00000198785|ENST00000361820	hsa-miR-15a-5p	0	38	44	38	44	13246	7mer-1a	x	7mer-1a	0		0	GRIN3A	protein_coding
ENSG00000198785	hsa-miR-15b-5p	ENSG00000198785|ENST00000361820	157	-15.16	2	18	3190	3211	16	0.75	0.8125	ENSG00000198785|ENST00000361820	hsa-miR-15b-5p	0	38	44	38	44	13247	7mer-1a	x	7mer-1a	0		0	GRIN3A	protein_coding
ENSG00000198624	hsa-miR-150-5p	ENSG00000198624|ENST00000355417	163	-27.08	2	20	1973	1995	20	0.85	0.85	ENSG00000198624|ENST00000355417	hsa-miR-150-5p	0	31	36	31	36	13255	6mer	x	6mer	0		0	CCDC69	protein_coding
ENSG00000221866	hsa-miR-339-5p	ENSG00000221866|ENST00000359827	151	-26.43	2	22	342	363	20	0.7	0.7	ENSG00000221866|ENST00000359827	hsa-miR-339-5p	0	43	50	43	50	13263	8mer-1a	x	8mer-1a	0		0	PLXNA4	protein_coding
ENSG00000221866	hsa-miR-361-3p	ENSG00000221866|ENST00000359827	157	-22.57	2	22	2717	2739	20	0.65	0.75	ENSG00000221866|ENST00000359827	hsa-miR-361-3p	0	26	31	26	31	13264	6mer	x	6mer	0		0	PLXNA4	protein_coding
ENSG00000142949	hsa-miR-128-3p	ENSG00000142949|ENST00000359947	151	-19.66	2	20	200	219	19	0.7368	0.7895	ENSG00000142949|ENST00000359947	hsa-miR-128-3p	0	17	22	17	22	13271	6mer	x	6mer	0		0	PTPRF	protein_coding
ENSG00000142949	hsa-miR-199a-3p	ENSG00000142949|ENST00000359947	182	-31.31	2	21	1282	1305	21	0.9048	0.9048	ENSG00000142949|ENST00000359947	hsa-miR-199a-3p	0	15	20	15	20	13272	6mer	x	6mer	0		0	PTPRF	protein_coding
ENSG00000142949	hsa-miR-199b-3p	ENSG00000142949|ENST00000359947	182	-31.31	2	21	1282	1305	21	0.9048	0.9048	ENSG00000142949|ENST00000359947	hsa-miR-199b-3p	0	15	20	15	20	13273	6mer	x	6mer	0		0	PTPRF	protein_coding
ENSG00000112531	hsa-miR-130a-3p	ENSG00000112531|ENST00000361758	143	-11.99	2	14	97	117	12	0.8333	0.8333	ENSG00000112531|ENST00000361758	hsa-miR-130a-3p	0	37	42	37	42	13317	6mer	x	6mer	0		0	QKI	protein_coding
ENSG00000112531	hsa-miR-148a-3p	ENSG00000112531|ENST00000361758	152	-17.97	2	19	1056	1079	19	0.7368	0.7895	ENSG00000112531|ENST00000361758	hsa-miR-148a-3p	0	37	44	37	44	13318	8mer-1a	x	8mer-1a	0		0	QKI	protein_coding
ENSG00000112531	hsa-miR-148b-3p	ENSG00000112531|ENST00000361758	152	-17.89	2	19	1056	1079	19	0.7368	0.7895	ENSG00000112531|ENST00000361758	hsa-miR-148b-3p	0	37	44	37	44	13319	8mer-1a	x	8mer-1a	0		0	QKI	protein_coding
ENSG00000112531	hsa-miR-30a-3p	ENSG00000112531|ENST00000361758	143	-9.23	2	21	3706	3730	22	0.5909	0.6818	ENSG00000112531|ENST00000361758	hsa-miR-30a-3p	0	40	46	40	46	13321	7mer-m8	x	7mer-m8	0		0	QKI	protein_coding
ENSG00000112531	hsa-miR-30e-3p	ENSG00000112531|ENST00000361758	143	-9.13	2	12	3306	3327	10	0.8	0.9	ENSG00000112531|ENST00000361758	hsa-miR-30e-3p	0	40	46	40	46	13322	7mer-m8	x	7mer-m8	0		0	QKI	protein_coding
ENSG00000127955	hsa-miR-320c	ENSG00000127955|ENST00000351004	150	-13.33	2	17	415	433	15	0.7333	0.8667	ENSG00000127955|ENST00000351004	hsa-miR-320c	0	19	25	19	25	13349	7mer-1a	x	7mer-1a	0		0	GNAI1	protein_coding
ENSG00000127955	hsa-miR-320d	ENSG00000127955|ENST00000351004	150	-11.69	2	17	416	433	15	0.7333	0.8667	ENSG00000127955|ENST00000351004	hsa-miR-320d	0	19	25	19	25	13350	7mer-1a	x	7mer-1a	0		0	GNAI1	protein_coding
ENSG00000120693	hsa-miR-25-3p	ENSG00000120693|ENST00000350148	154	-14.96	2	21	168	188	19	0.6842	0.7895	ENSG00000120693|ENST00000350148	hsa-miR-25-3p	0	40	45	40	45	13351	6mer	x	6mer	0		0	SMAD9	protein_coding
ENSG00000120693	hsa-miR-92a-3p	ENSG00000120693|ENST00000350148	162	-16.12	2	21	168	188	19	0.7895	0.7895	ENSG00000120693|ENST00000350148	hsa-miR-92a-3p	0	40	45	40	45	13352	6mer	x	6mer	0		0	SMAD9	protein_coding
ENSG00000002919	hsa-miR-15a-5p	ENSG00000002919|ENST00000359238	143	-16.6	2	14	1471	1495	15	0.8	0.8	ENSG00000002919|ENST00000359238	hsa-miR-15a-5p	0	44	49	44	49	13353	6mer	x	6mer	0		0	SNX11	protein_coding
ENSG00000002919	hsa-miR-15b-5p	ENSG00000002919|ENST00000359238	148	-16.08	2	21	1474	1495	21	0.6667	0.7619	ENSG00000002919|ENST00000359238	hsa-miR-15b-5p	0	44	49	44	49	13354	6mer	x	6mer	0		0	SNX11	protein_coding
ENSG00000002919	hsa-miR-320c	ENSG00000002919|ENST00000359238	157	-20.97	2	19	2045	2065	18	0.7222	0.8333	ENSG00000002919|ENST00000359238	hsa-miR-320c	0	37	42	37	42	13355	6mer	x	6mer	0		0	SNX11	protein_coding
ENSG00000002919	hsa-miR-320d	ENSG00000002919|ENST00000359238	156	-20.51	2	18	2046	2065	17	0.7647	0.8235	ENSG00000002919|ENST00000359238	hsa-miR-320d	0	37	42	37	42	13356	6mer	x	6mer	0		0	SNX11	protein_coding
ENSG00000115705	hsa-miR-28-3p	ENSG00000115705|ENST00000345913	147	-13.95	2	21	108	126	19	0.6842	0.7895	ENSG00000115705|ENST00000345913	hsa-miR-28-3p	0	18	24	18	24	13377	7mer-m8	x	7mer-m8	0		0	TPO	protein_coding
ENSG00000196428	hsa-miR-192-5p	ENSG00000196428|ENST00000361875	158	-12.23	2	19	5609	5629	17	0.7647	0.7647	ENSG00000196428|ENST00000361875	hsa-miR-192-5p	0	20	25	20	25	13383	6mer	x	6mer	0		0	TSC22D2	protein_coding
ENSG00000196428	hsa-miR-215-5p	ENSG00000196428|ENST00000361875	158	-14.47	2	19	5609	5629	17	0.7647	0.7647	ENSG00000196428|ENST00000361875	hsa-miR-215-5p	0	20	25	20	25	13384	6mer	x	6mer	0		0	TSC22D2	protein_coding
ENSG00000196428	hsa-miR-26a-5p	ENSG00000196428|ENST00000361875	145	-13.29	2	10	1685	1706	8	1	1	ENSG00000196428|ENST00000361875	hsa-miR-26a-5p	0	15	20	15	20	13385	6mer	x	6mer	0		0	TSC22D2	protein_coding
ENSG00000119927	hsa-miR-146a-5p	ENSG00000119927|ENST00000348367	164	-16.49	2	17	934	955	15	0.8667	0.8667	ENSG00000119927|ENST00000348367	hsa-miR-146a-5p	0	23	30	23	30	13404	8mer-1a	x	8mer-1a	0		0	GPAM	protein_coding
ENSG00000119927	hsa-miR-146b-5p	ENSG00000119927|ENST00000348367	168	-21.8	2	22	932	955	21	0.7619	0.8095	ENSG00000119927|ENST00000348367	hsa-miR-146b-5p	0	23	30	23	30	13405	8mer-1a	x	8mer-1a	0		0	GPAM	protein_coding
ENSG00000162591	hsa-miR-29a-3p	ENSG00000162591|ENST00000356575	141	-16.72	2	21	371	390	19	0.5789	0.7368	ENSG00000162591|ENST00000356575	hsa-miR-29a-3p	0	33	38	33	38	13429	6mer	x	6mer	0		0	MEGF6	protein_coding
ENSG00000162591	hsa-miR-29b-3p	ENSG00000162591|ENST00000356575	141	-14.55	2	21	370	390	19	0.5789	0.7368	ENSG00000162591|ENST00000356575	hsa-miR-29b-3p	0	33	38	33	38	13430	6mer	x	6mer	0		0	MEGF6	protein_coding
ENSG00000162591	hsa-miR-29c-3p	ENSG00000162591|ENST00000356575	141	-15.31	2	21	371	390	19	0.5789	0.7368	ENSG00000162591|ENST00000356575	hsa-miR-29c-3p	0	33	38	33	38	13431	6mer	x	6mer	0		0	MEGF6	protein_coding
ENSG00000162591	hsa-miR-335-5p	ENSG00000162591|ENST00000356575	148	-13.55	2	13	142	164	11	0.8182	0.9091	ENSG00000162591|ENST00000356575	hsa-miR-335-5p	0	22	27	22	27	13432	6mer	x	6mer	0		0	MEGF6	protein_coding
ENSG00000101019	hsa-miR-15a-5p	ENSG00000101019|ENST00000374394	144	-11.89	2	13	1466	1487	11	0.8182	0.8182	ENSG00000101019|ENST00000374394	hsa-miR-15a-5p	0	51	56	51	56	13449	6mer	x	6mer	0		0	UQCC1	protein_coding
ENSG00000101019	hsa-miR-15b-5p	ENSG00000101019|ENST00000374394	146	-18.35	2	20	1461	1487	23	0.5652	0.7391	ENSG00000101019|ENST00000374394	hsa-miR-15b-5p	0	51	56	51	56	13450	6mer	x	6mer	0		0	UQCC1	protein_coding
ENSG00000101019	hsa-miR-223-3p	ENSG00000101019|ENST00000374394	145	-11.92	2	19	960	983	19	0.6316	0.7368	ENSG00000101019|ENST00000374394	hsa-miR-223-3p	0	15	21	15	21	13451	7mer-1a	x	7mer-1a	0		0	UQCC1	protein_coding
ENSG00000101019	hsa-miR-23a-3p	ENSG00000101019|ENST00000374394	149	-14.02	2	14	681	701	12	0.8333	0.8333	ENSG00000101019|ENST00000374394	hsa-miR-23a-3p	0	37	42	37	42	13452	6mer	x	6mer	0		0	UQCC1	protein_coding
ENSG00000101019	hsa-miR-23b-3p	ENSG00000101019|ENST00000374394	149	-14.02	2	14	679	701	12	0.8333	0.8333	ENSG00000101019|ENST00000374394	hsa-miR-23b-3p	0	37	42	37	42	13453	6mer	x	6mer	0		0	UQCC1	protein_coding
ENSG00000101019	hsa-miR-23c	ENSG00000101019|ENST00000374394	155	-11.44	2	17	679	701	16	0.8125	0.8125	ENSG00000101019|ENST00000374394	hsa-miR-23c	0	37	42	37	42	13454	6mer	x	6mer	0		0	UQCC1	protein_coding
ENSG00000117036	hsa-miR-27a-3p	ENSG00000117036|ENST00000368192	144	-14.67	2	18	923	945	18	0.6667	0.7222	ENSG00000117036|ENST00000368192	hsa-miR-27a-3p	0	47	52	47	52	13462	6mer	x	6mer	0		0	ETV3	protein_coding
ENSG00000117036	hsa-miR-27b-3p	ENSG00000117036|ENST00000368192	144	-15.69	2	18	923	945	18	0.6667	0.7222	ENSG00000117036|ENST00000368192	hsa-miR-27b-3p	0	47	52	47	52	13463	6mer	x	6mer	0		0	ETV3	protein_coding
ENSG00000122482	hsa-miR-142-5p	ENSG00000122482|ENST00000370440	160	-10.55	2	17	875	895	15	0.8	0.8667	ENSG00000122482|ENST00000370440	hsa-miR-142-5p	0	53	58	53	58	13471	6mer	x	6mer	0		0	ZNF644	protein_coding
ENSG00000147180	hsa-miR-142-5p	ENSG00000147180|ENST00000373165	145	-6.52	2	10	279	299	8	1	1	ENSG00000147180|ENST00000373165	hsa-miR-142-5p	0	42	48	42	48	13473	7mer-m8	x	7mer-m8	0		0	ZNF711	protein_coding
ENSG00000173212	hsa-miR-335-5p	ENSG00000173212|ENST00000369500	149	-14.78	2	14	1358	1380	12	0.8333	0.8333	ENSG00000173212|ENST00000369500	hsa-miR-335-5p	0	50	56	50	56	13482	7mer-1a	x	7mer-1a	0		0	MAB21L3	protein_coding
ENSG00000204084	hsa-miR-26a-5p	ENSG00000204084|ENST00000373027	156	-17.33	2	17	7	28	15	0.8	0.8	ENSG00000204084|ENST00000373027	hsa-miR-26a-5p	0	21	27	21	27	13505	7mer-1a	x	7mer-1a	0		0	INPP5B	protein_coding
ENSG00000079950	hsa-miR-142-5p	ENSG00000079950|ENST00000367941	142	-9.11	2	11	10386	10406	9	0.8889	0.8889	ENSG00000079950|ENST00000367941	hsa-miR-142-5p	0	36	41	36	41	13514	6mer	x	6mer	0		0	STX7	protein_coding
ENSG00000170075	hsa-miR-150-5p	ENSG00000170075|ENST00000367282	158	-21.84	2	21	3769	3789	19	0.6842	0.8421	ENSG00000170075|ENST00000367282	hsa-miR-150-5p	0	37	42	37	42	13515	6mer	x	6mer	0		0	GPR37L1	protein_coding
ENSG00000142875	hsa-miR-126-5p	ENSG00000142875|ENST00000370682	140	-2.42	2	9	429	449	7	1	1	ENSG00000142875|ENST00000370682	hsa-miR-126-5p	0	54	59	54	59	13517	6mer	x	6mer	0		0	PRKACB	protein_coding
ENSG00000057252	hsa-miR-382-5p	ENSG00000057252|ENST00000367619	141	-7.69	2	18	1372	1393	16	0.5625	0.75	ENSG00000057252|ENST00000367619	hsa-miR-382-5p	0	31	38	31	38	13551	8mer-1a	x	8mer-1a	0		0	SOAT1	protein_coding
ENSG00000009780	hsa-miR-126-5p	ENSG00000009780|ENST00000373954	158	-10.46	2	19	1790	1810	17	0.6471	0.8824	ENSG00000009780|ENST00000373954	hsa-miR-126-5p	0	15	21	15	21	13560	7mer-1a	x	7mer-1a	0		0	FAM76A	protein_coding
ENSG00000244462	hsa-miR-15a-5p	ENSG00000244462|ENST00000374114	148	-13.18	2	20	3288	3309	19	0.6842	0.7895	ENSG00000244462|ENST00000374114	hsa-miR-15a-5p	0	21	26	21	26	13565	6mer	x	6mer	0		0	RBM12	protein_coding
ENSG00000244462	hsa-miR-15b-5p	ENSG00000244462|ENST00000374114	148	-14.43	2	20	3288	3309	19	0.6842	0.7895	ENSG00000244462|ENST00000374114	hsa-miR-15b-5p	0	21	26	21	26	13566	6mer	x	6mer	0		0	RBM12	protein_coding
ENSG00000126107	hsa-miR-744-5p	ENSG00000126107|ENST00000372168	166	-34.46	2	21	167	187	19	0.7895	0.8421	ENSG00000126107|ENST00000372168	hsa-miR-744-5p	0	25	32	25	32	13599	8mer-1a	x	8mer-1a	0		0	HECTD3	protein_coding
ENSG00000137413	hsa-miR-335-5p	ENSG00000137413|ENST00000372982	142	-12.94	2	22	467	487	20	0.65	0.65	ENSG00000137413|ENST00000372982	hsa-miR-335-5p	0	29	34	29	34	13605	6mer	x	6mer	0		0	TAF8	protein_coding
ENSG00000160710	hsa-miR-192-5p	ENSG00000160710|ENST00000368471	142	-11.93	2	20	1731	1748	18	0.6667	0.7778	ENSG00000160710|ENST00000368471	hsa-miR-192-5p	0	25	30	25	30	13606	6mer	x	6mer	0		0	ADAR	protein_coding
ENSG00000160710	hsa-miR-215-5p	ENSG00000160710|ENST00000368471	142	-14.13	2	20	1731	1748	18	0.6667	0.7778	ENSG00000160710|ENST00000368471	hsa-miR-215-5p	0	25	30	25	30	13607	6mer	x	6mer	0		0	ADAR	protein_coding
ENSG00000204301	hsa-miR-128-3p	ENSG00000204301|ENST00000375023	148	-15.94	2	20	491	509	18	0.7222	0.7222	ENSG00000204301|ENST00000375023	hsa-miR-128-3p	0	36	42	36	42	13629	7mer-1a	x	7mer-1a	0		0	NOTCH4	protein_coding
ENSG00000137204	hsa-miR-7847-3p	ENSG00000137204|ENST00000372589	142	-16.8	2	11	6	26	9	0.8889	0.8889	ENSG00000137204|ENST00000372589	hsa-miR-7847-3p	0	43	50	43	50	13662	8mer-1a	x	8mer-1a	0		0	SLC22A7	protein_coding
ENSG00000117408	hsa-miR-150-5p	ENSG00000117408|ENST00000372343	155	-21.51	2	21	156	178	20	0.7	0.75	ENSG00000117408|ENST00000372343	hsa-miR-150-5p	0	21	27	21	27	13678	7mer-m8	x	7mer-m8	0		0	IPO13	protein_coding
ENSG00000064787	hsa-miR-15a-5p	ENSG00000064787|ENST00000371435	140	-14.33	2	9	623	644	7	1	1	ENSG00000064787|ENST00000371435	hsa-miR-15a-5p	0	21	27	21	27	13690	7mer-m8	x	7mer-m8	0		0	BCAS1	protein_coding
ENSG00000064787	hsa-miR-15b-5p	ENSG00000064787|ENST00000371435	150	-13.59	2	21	624	644	19	0.6842	0.7368	ENSG00000064787|ENST00000371435	hsa-miR-15b-5p	0	21	27	21	27	13691	7mer-m8	x	7mer-m8	0		0	BCAS1	protein_coding
ENSG00000112208	hsa-miR-7847-3p	ENSG00000112208|ENST00000370693	148	-22.2	2	20	2191	2215	22	0.7273	0.7273	ENSG00000112208|ENST00000370693	hsa-miR-7847-3p	0	30	35	30	35	13711	6mer	x	6mer	0		0	BAG2	protein_coding
ENSG00000143315	hsa-miR-664a-5p	ENSG00000143315|ENST00000368090	141	-12.64	2	10	561	584	8	0.875	1	ENSG00000143315|ENST00000368090	hsa-miR-664a-5p	0	34	40	34	40	13712	7mer-m8	x	7mer-m8	0		0	PIGM	protein_coding
ENSG00000172673	hsa-miR-425-5p	ENSG00000172673|ENST00000368250	141	-10.92	2	10	546	568	8	0.875	1	ENSG00000172673|ENST00000368250	hsa-miR-425-5p	0	29	34	29	34	13719	6mer	x	6mer	0		0	THEMIS	protein_coding
ENSG00000118473	hsa-miR-21-5p	ENSG00000118473|ENST00000371037	144	-11.81	2	21	2315	2336	19	0.5789	0.6842	ENSG00000118473|ENST00000371037	hsa-miR-21-5p	0	38	44	38	44	13735	7mer-1a	x	7mer-1a	0		0	SGIP1	protein_coding
ENSG00000143179	hsa-miR-15a-5p	ENSG00000143179|ENST00000367879	140	-14.92	2	9	1324	1345	7	1	1	ENSG00000143179|ENST00000367879	hsa-miR-15a-5p	0	15	20	15	20	13742	6mer	x	6mer	0		0	UCK2	protein_coding
ENSG00000143179	hsa-miR-15b-5p	ENSG00000143179|ENST00000367879	148	-16.33	2	17	1324	1345	15	0.6667	0.8	ENSG00000143179|ENST00000367879	hsa-miR-15b-5p	0	15	20	15	20	13743	6mer	x	6mer	0		0	UCK2	protein_coding
ENSG00000267561	hsa-miR-30a-3p	ENSG00000267561|ENST00000370548	146	-9.21	2	15	188	209	13	0.6923	0.8462	ENSG00000267561|ENST00000370548	hsa-miR-30a-3p	0	28	34	28	34	13749	7mer-m8	x	7mer-m8	0		0	AC093155.3	protein_coding
ENSG00000267561	hsa-miR-30e-3p	ENSG00000267561|ENST00000370548	146	-8.11	2	15	188	209	13	0.6923	0.8462	ENSG00000267561|ENST00000370548	hsa-miR-30e-3p	0	28	34	28	34	13750	7mer-m8	x	7mer-m8	0		0	AC093155.3	protein_coding
ENSG00000173214	hsa-miR-130a-3p	ENSG00000173214|ENST00000368847	154	-10.53	2	17	2298	2318	15	0.8	0.8667	ENSG00000173214|ENST00000368847	hsa-miR-130a-3p	0	41	46	41	46	13754	6mer	x	6mer	0		0	MFSD4B	protein_coding
ENSG00000173214	hsa-miR-148a-3p	ENSG00000173214|ENST00000368847	142	-13.89	2	11	1035	1056	9	0.8889	0.8889	ENSG00000173214|ENST00000368847	hsa-miR-148a-3p	0	41	48	41	48	13755	8mer-1a	x	8mer-1a	0		0	MFSD4B	protein_coding
ENSG00000173214	hsa-miR-148b-3p	ENSG00000173214|ENST00000368847	145	-15.04	2	10	1035	1056	8	1	1	ENSG00000173214|ENST00000368847	hsa-miR-148b-3p	0	41	48	41	48	13756	8mer-1a	x	8mer-1a	0		0	MFSD4B	protein_coding
ENSG00000146469	hsa-miR-382-5p	ENSG00000146469|ENST00000367244	158	-16.1	2	21	97	117	19	0.7368	0.7895	ENSG00000146469|ENST00000367244	hsa-miR-382-5p	0	36	41	36	41	13807	6mer	x	6mer	0		0	VIP	protein_coding
ENSG00000131044	hsa-miR-130a-3p	ENSG00000131044|ENST00000375938	155	-13.68	2	16	682	703	14	0.7143	0.9286	ENSG00000131044|ENST00000375938	hsa-miR-130a-3p	0	19	26	19	26	13823	8mer-1a	x	8mer-1a	0		0	TTLL9	protein_coding
ENSG00000186231	hsa-miR-23a-3p	ENSG00000186231|ENST00000369261	141	-9.81	2	10	1271	1291	8	0.875	1	ENSG00000186231|ENST00000369261	hsa-miR-23a-3p	0	29	34	29	34	13842	6mer	x	6mer	0		0	KLHL32	protein_coding
ENSG00000186231	hsa-miR-23b-3p	ENSG00000186231|ENST00000369261	141	-10.2	2	10	1269	1291	8	0.875	1	ENSG00000186231|ENST00000369261	hsa-miR-23b-3p	0	29	34	29	34	13843	6mer	x	6mer	0		0	KLHL32	protein_coding
ENSG00000186231	hsa-miR-23c	ENSG00000186231|ENST00000369261	145	-10.14	2	20	1271	1291	18	0.6667	0.7222	ENSG00000186231|ENST00000369261	hsa-miR-23c	0	29	34	29	34	13844	6mer	x	6mer	0		0	KLHL32	protein_coding
ENSG00000172339	hsa-miR-148a-3p	ENSG00000172339|ENST00000370205	146	-22.89	2	21	1112	1128	19	0.6842	0.7368	ENSG00000172339|ENST00000370205	hsa-miR-148a-3p	0	36	41	36	41	13873	6mer	x	6mer	0		0	ALG14	protein_coding
ENSG00000172339	hsa-miR-148b-3p	ENSG00000172339|ENST00000370205	146	-22.89	2	21	1112	1128	19	0.6842	0.7368	ENSG00000172339|ENST00000370205	hsa-miR-148b-3p	0	36	41	36	41	13874	6mer	x	6mer	0		0	ALG14	protein_coding
ENSG00000172339	hsa-miR-24-3p	ENSG00000172339|ENST00000370205	146	-16.6	2	15	5176	5197	13	0.7692	0.7692	ENSG00000172339|ENST00000370205	hsa-miR-24-3p	0	28	33	28	33	13876	6mer	x	6mer	0		0	ALG14	protein_coding
ENSG00000172339	hsa-miR-361-3p	ENSG00000172339|ENST00000370205	153	-24.26	2	22	4953	4975	20	0.6	0.75	ENSG00000172339|ENST00000370205	hsa-miR-361-3p	0	49	55	49	55	13877	7mer-m8	x	7mer-m8	0		0	ALG14	protein_coding
ENSG00000165669	hsa-miR-361-3p	ENSG00000165669|ENST00000369183	162	-27.05	2	20	7879	7902	19	0.7368	0.8421	ENSG00000165669|ENST00000369183	hsa-miR-361-3p	0	15	21	15	21	13908	7mer-1a	x	7mer-1a	0		0	FAM204A	protein_coding
ENSG00000153291	hsa-miR-146a-5p	ENSG00000153291|ENST00000371347	151	-16.25	2	17	145	168	17	0.7647	0.7647	ENSG00000153291|ENST00000371347	hsa-miR-146a-5p	0	53	58	53	58	13914	6mer	x	6mer	0		0	SLC25A27	protein_coding
ENSG00000153291	hsa-miR-146b-5p	ENSG00000153291|ENST00000371347	155	-15.03	2	21	144	168	21	0.6667	0.7619	ENSG00000153291|ENST00000371347	hsa-miR-146b-5p	0	53	58	53	58	13915	6mer	x	6mer	0		0	SLC25A27	protein_coding
ENSG00000107263	hsa-miR-29a-3p	ENSG00000107263|ENST00000372190	152	-18.86	2	13	607	628	11	0.9091	0.9091	ENSG00000107263|ENST00000372190	hsa-miR-29a-3p	0	19	24	19	24	13932	6mer	x	6mer	0		0	RAPGEF1	protein_coding
ENSG00000107263	hsa-miR-29b-3p	ENSG00000107263|ENST00000372190	148	-15.38	2	13	606	628	11	0.8182	0.9091	ENSG00000107263|ENST00000372190	hsa-miR-29b-3p	0	19	24	19	24	13933	6mer	x	6mer	0		0	RAPGEF1	protein_coding
ENSG00000107263	hsa-miR-29c-3p	ENSG00000107263|ENST00000372190	148	-17.2	2	13	607	628	11	0.8182	0.9091	ENSG00000107263|ENST00000372190	hsa-miR-29c-3p	0	19	24	19	24	13934	6mer	x	6mer	0		0	RAPGEF1	protein_coding
ENSG00000169442	hsa-miR-361-3p	ENSG00000169442|ENST00000374213	155	-24.9	2	22	175	196	20	0.7	0.75	ENSG00000169442|ENST00000374213	hsa-miR-361-3p	0	38	43	38	43	13942	6mer	x	6mer	0		0	CD52	protein_coding
ENSG00000146166	hsa-miR-15a-5p	ENSG00000146166|ENST00000370657	163	-14.5	2	21	906	929	21	0.7143	0.8095	ENSG00000146166|ENST00000370657	hsa-miR-15a-5p	0	19	24	19	24	13943	6mer	x	6mer	0		0	LGSN	protein_coding
ENSG00000146166	hsa-miR-15b-5p	ENSG00000146166|ENST00000370657	161	-14.18	2	20	906	929	20	0.75	0.85	ENSG00000146166|ENST00000370657	hsa-miR-15b-5p	0	19	24	19	24	13944	6mer	x	6mer	0		0	LGSN	protein_coding
ENSG00000148339	hsa-miR-128-3p	ENSG00000148339|ENST00000373064	149	-20.57	2	19	1493	1514	18	0.6667	0.7778	ENSG00000148339|ENST00000373064	hsa-miR-128-3p	0	34	39	34	39	13962	6mer	x	6mer	0		0	SLC25A25	protein_coding
ENSG00000204304	hsa-miR-361-3p	ENSG00000204304|ENST00000375050	148	-19.69	2	19	132	156	19	0.6842	0.7895	ENSG00000204304|ENST00000375050	hsa-miR-361-3p	0	24	31	24	31	13972	8mer-1a	x	8mer-1a	0		0	PBX2	protein_coding
ENSG00000198216	hsa-miR-191-5p	ENSG00000198216|ENST00000367567	140	-11.96	2	9	2715	2737	7	1	1	ENSG00000198216|ENST00000367567	hsa-miR-191-5p	0	29	35	29	35	13974	7mer-1a	x	7mer-1a	0		0	CACNA1E	protein_coding
ENSG00000204438	hsa-miR-15a-5p	ENSG00000204438|ENST00000375896	160	-15.3	2	21	11	32	19	0.6842	0.7895	ENSG00000204438|ENST00000375896	hsa-miR-15a-5p	0	54	60	54	60	14008	7mer-1a	x	7mer-1a	0		0	GPANK1	protein_coding
ENSG00000204438	hsa-miR-15b-5p	ENSG00000204438|ENST00000375896	158	-15.34	2	19	11	32	17	0.7059	0.8235	ENSG00000204438|ENST00000375896	hsa-miR-15b-5p	0	54	60	54	60	14009	7mer-1a	x	7mer-1a	0		0	GPANK1	protein_coding
ENSG00000101017	hsa-miR-361-3p	ENSG00000101017|ENST00000372285	147	-23.56	2	19	686	706	17	0.6471	0.8235	ENSG00000101017|ENST00000372285	hsa-miR-361-3p	0	32	37	32	37	14013	6mer	x	6mer	0		0	CD40	protein_coding
ENSG00000203734	hsa-miR-130a-3p	ENSG00000203734|ENST00000367682	150	-15.34	2	11	680	701	9	1	1	ENSG00000203734|ENST00000367682	hsa-miR-130a-3p	0	17	23	17	23	14020	7mer-m8	x	7mer-m8	0		0	ECT2L	protein_coding
ENSG00000197959	hsa-miR-27a-3p	ENSG00000197959|ENST00000367731	145	-14.83	2	20	3315	3337	20	0.65	0.75	ENSG00000197959|ENST00000367731	hsa-miR-27a-3p	0	20	25	20	25	14024	6mer	x	6mer	0		0	DNM3	protein_coding
ENSG00000197959	hsa-miR-27b-3p	ENSG00000197959|ENST00000367731	143	-11.43	2	20	3317	3337	18	0.6111	0.6667	ENSG00000197959|ENST00000367731	hsa-miR-27b-3p	0	20	25	20	25	14025	6mer	x	6mer	0		0	DNM3	protein_coding
ENSG00000241935	hsa-miR-24-3p	ENSG00000241935|ENST00000370646	163	-25.11	2	21	10	32	20	0.75	0.8	ENSG00000241935|ENST00000370646	hsa-miR-24-3p	0	35	40	35	40	14027	6mer	x	6mer	0		0	HOGA1	protein_coding
ENSG00000130720	hsa-miR-361-3p	ENSG00000130720|ENST00000372338	155	-21.89	2	22	1536	1561	23	0.6522	0.7826	ENSG00000130720|ENST00000372338	hsa-miR-361-3p	0	21	26	21	26	14032	6mer	x	6mer	0		0	FIBCD1	protein_coding
ENSG00000085491	hsa-miR-142-5p	ENSG00000085491|ENST00000370041	152	-5.63	2	13	211	231	11	0.9091	0.9091	ENSG00000085491|ENST00000370041	hsa-miR-142-5p	0	30	36	30	36	14091	7mer-1a	x	7mer-1a	0		0	SLC25A24	protein_coding
ENSG00000133134	hsa-miR-181a-5p	ENSG00000133134|ENST00000372677	144	-13.19	2	22	114	138	22	0.5909	0.6818	ENSG00000133134|ENST00000372677	hsa-miR-181a-5p	0	55	60	55	60	14093	6mer	x	6mer	0		0	BEX2	protein_coding
ENSG00000133134	hsa-miR-181b-5p	ENSG00000133134|ENST00000372677	156	-17.86	2	22	114	138	22	0.6364	0.7727	ENSG00000133134|ENST00000372677	hsa-miR-181b-5p	0	55	60	55	60	14094	6mer	x	6mer	0		0	BEX2	protein_coding
ENSG00000117010	hsa-miR-130a-3p	ENSG00000117010|ENST00000372699	147	-9.14	2	14	683	703	12	0.8333	0.9167	ENSG00000117010|ENST00000372699	hsa-miR-130a-3p	0	24	29	24	29	14097	6mer	x	6mer	0		0	ZNF684	protein_coding
ENSG00000162814	hsa-miR-23a-3p	ENSG00000162814|ENST00000366933	149	-16.12	2	14	887	907	12	0.8333	0.8333	ENSG00000162814|ENST00000366933	hsa-miR-23a-3p	0	40	46	40	46	14128	7mer-1a	x	7mer-1a	0		0	SPATA17	protein_coding
ENSG00000162814	hsa-miR-23b-3p	ENSG00000162814|ENST00000366933	149	-13.92	2	14	885	907	12	0.8333	0.8333	ENSG00000162814|ENST00000366933	hsa-miR-23b-3p	0	40	46	40	46	14129	7mer-1a	x	7mer-1a	0		0	SPATA17	protein_coding
ENSG00000162814	hsa-miR-23c	ENSG00000162814|ENST00000366933	154	-15.69	2	15	886	907	13	0.8462	0.8462	ENSG00000162814|ENST00000366933	hsa-miR-23c	0	40	46	40	46	14130	7mer-1a	x	7mer-1a	0		0	SPATA17	protein_coding
ENSG00000076864	hsa-miR-941	ENSG00000076864|ENST00000374761	152	-25.26	2	22	438	461	21	0.619	0.7619	ENSG00000076864|ENST00000374761	hsa-miR-941	0	54	60	54	60	14132	7mer-m8	x	7mer-m8	0		0	RAP1GAP	protein_coding
ENSG00000101935	hsa-miR-150-5p	ENSG00000101935|ENST00000372057	140	-13.96	2	9	1966	1987	7	1	1	ENSG00000101935|ENST00000372057	hsa-miR-150-5p	0	31	37	31	37	14133	7mer-m8	x	7mer-m8	0		0	AMMECR1	protein_coding
ENSG00000117298	hsa-miR-199a-5p	ENSG00000117298|ENST00000374893	145	-16.62	2	22	355	376	21	0.6667	0.7143	ENSG00000117298|ENST00000374893	hsa-miR-199a-5p	0	19	25	19	25	14140	7mer-1a	x	7mer-1a	0		0	ECE1	protein_coding
ENSG00000158813	hsa-miR-150-5p	ENSG00000158813|ENST00000374553	150	-18.05	2	15	28	49	13	0.7692	0.8462	ENSG00000158813|ENST00000374553	hsa-miR-150-5p	0	50	55	50	55	14141	6mer	x	6mer	0		0	EDA	protein_coding
ENSG00000123473	hsa-miR-320c	ENSG00000123473|ENST00000371877	153	-16.22	2	18	810	829	16	0.6875	0.8125	ENSG00000123473|ENST00000371877	hsa-miR-320c	0	42	48	42	48	14157	7mer-m8	x	7mer-m8	0		0	STIL	protein_coding
ENSG00000123473	hsa-miR-320d	ENSG00000123473|ENST00000371877	153	-16.22	2	18	811	829	16	0.6875	0.8125	ENSG00000123473|ENST00000371877	hsa-miR-320d	0	42	48	42	48	14158	7mer-m8	x	7mer-m8	0		0	STIL	protein_coding
ENSG00000183520	hsa-miR-584-5p	ENSG00000183520|ENST00000373014	144	-16.37	2	18	86	109	18	0.6111	0.7778	ENSG00000183520|ENST00000373014	hsa-miR-584-5p	0	30	35	30	35	14160	6mer	x	6mer	0		0	UTP11	protein_coding
ENSG00000116396	hsa-miR-130a-3p	ENSG00000116396|ENST00000369787	147	-9.45	2	12	15613	15634	10	0.8	1	ENSG00000116396|ENST00000369787	hsa-miR-130a-3p	0	32	37	32	37	14183	6mer	x	6mer	0		0	KCNC4	protein_coding
ENSG00000116396	hsa-miR-148a-3p	ENSG00000116396|ENST00000369787	156	-14.12	2	17	212	233	15	0.8	0.8	ENSG00000116396|ENST00000369787	hsa-miR-148a-3p	0	32	38	32	38	14184	7mer-m8	x	7mer-m8	0		0	KCNC4	protein_coding
ENSG00000116396	hsa-miR-148b-3p	ENSG00000116396|ENST00000369787	148	-14.04	2	17	212	233	15	0.7333	0.7333	ENSG00000116396|ENST00000369787	hsa-miR-148b-3p	0	32	38	32	38	14185	7mer-m8	x	7mer-m8	0		0	KCNC4	protein_coding
ENSG00000116396	hsa-miR-199a-5p	ENSG00000116396|ENST00000369787	145	-15.9	2	18	5619	5642	18	0.7778	0.7778	ENSG00000116396|ENST00000369787	hsa-miR-199a-5p	0	34	40	34	40	14186	7mer-1a	x	7mer-1a	0		0	KCNC4	protein_coding
ENSG00000186007	hsa-miR-142-3p	ENSG00000186007|ENST00000367151	157	-14.49	2	19	44	67	18	0.7778	0.7778	ENSG00000186007|ENST00000367151	hsa-miR-142-3p	0	28	33	28	33	14200	6mer	x	6mer	0		0	LEMD1	protein_coding
ENSG00000144290	hsa-miR-335-5p	ENSG00000144290|ENST00000375514	152	-14.12	2	13	1265	1287	11	0.9091	0.9091	ENSG00000144290|ENST00000375514	hsa-miR-335-5p	0	15	20	15	20	14211	6mer	x	6mer	0		0	SLC4A10	protein_coding
ENSG00000096401	hsa-miR-25-3p	ENSG00000096401|ENST00000371477	157	-23	2	21	3195	3220	23	0.6957	0.8261	ENSG00000096401|ENST00000371477	hsa-miR-25-3p	0	55	60	55	60	14219	6mer	x	6mer	0		0	CDC5L	protein_coding
ENSG00000096401	hsa-miR-92a-3p	ENSG00000096401|ENST00000371477	161	-27.32	2	21	3195	3220	23	0.7391	0.8261	ENSG00000096401|ENST00000371477	hsa-miR-92a-3p	0	55	60	55	60	14221	6mer	x	6mer	0		0	CDC5L	protein_coding
ENSG00000143493	hsa-miR-148a-3p	ENSG00000143493|ENST00000366992	143	-12.11	2	14	1	20	12	0.8333	0.8333	ENSG00000143493|ENST00000366992	hsa-miR-148a-3p	0	35	42	35	42	14230	8mer-1a	x	8mer-1a	0		0	INTS7	protein_coding
ENSG00000143493	hsa-miR-148b-3p	ENSG00000143493|ENST00000366992	146	-13.26	2	12	1	20	11	0.9091	0.9091	ENSG00000143493|ENST00000366992	hsa-miR-148b-3p	0	35	42	35	42	14231	8mer-1a	x	8mer-1a	0		0	INTS7	protein_coding
ENSG00000169213	hsa-miR-15a-5p	ENSG00000169213|ENST00000371655	155	-19.84	2	21	112	136	22	0.6818	0.7273	ENSG00000169213|ENST00000371655	hsa-miR-15a-5p	0	54	60	54	60	14251	7mer-1a	x	7mer-1a	0		0	RAB3B	protein_coding
ENSG00000169213	hsa-miR-15b-5p	ENSG00000169213|ENST00000371655	158	-18.9	2	20	112	136	21	0.7143	0.7619	ENSG00000169213|ENST00000371655	hsa-miR-15b-5p	0	54	60	54	60	14252	7mer-1a	x	7mer-1a	0		0	RAB3B	protein_coding
ENSG00000169213	hsa-miR-199a-3p	ENSG00000169213|ENST00000371655	145	-11.27	2	18	8866	8885	16	0.75	0.8125	ENSG00000169213|ENST00000371655	hsa-miR-199a-3p	0	26	32	26	32	14253	7mer-1a	x	7mer-1a	0		0	RAB3B	protein_coding
ENSG00000169213	hsa-miR-199b-3p	ENSG00000169213|ENST00000371655	145	-11.27	2	18	8866	8885	16	0.75	0.8125	ENSG00000169213|ENST00000371655	hsa-miR-199b-3p	0	26	32	26	32	14254	7mer-1a	x	7mer-1a	0		0	RAB3B	protein_coding
ENSG00000070159	hsa-miR-361-3p	ENSG00000070159|ENST00000374541	145	-22.75	2	20	503	524	18	0.6111	0.7778	ENSG00000070159|ENST00000374541	hsa-miR-361-3p	0	25	30	25	30	14256	6mer	x	6mer	0		0	PTPN3	protein_coding
ENSG00000123684	hsa-miR-27a-3p	ENSG00000123684|ENST00000366997	148	-17.81	2	14	1685	1706	13	0.7692	0.9231	ENSG00000123684|ENST00000366997	hsa-miR-27a-3p	0	42	48	42	48	14290	7mer-1a	x	7mer-1a	0		0	LPGAT1	protein_coding
ENSG00000123684	hsa-miR-27b-3p	ENSG00000123684|ENST00000366997	148	-18.19	2	14	1685	1706	13	0.7692	0.9231	ENSG00000123684|ENST00000366997	hsa-miR-27b-3p	0	42	48	42	48	14291	7mer-1a	x	7mer-1a	0		0	LPGAT1	protein_coding
ENSG00000131778	hsa-miR-382-5p	ENSG00000131778|ENST00000369258	143	-8.03	2	21	169	191	20	0.6	0.7	ENSG00000131778|ENST00000369258	hsa-miR-382-5p	0	47	53	47	53	14311	7mer-m8	x	7mer-m8	0		0	CHD1L	protein_coding
ENSG00000095574	hsa-miR-221-3p	ENSG00000095574|ENST00000368886	146	-17.1	2	19	2490	2512	17	0.5882	0.7647	ENSG00000095574|ENST00000368886	hsa-miR-221-3p	0	31	36	31	36	14332	6mer	x	6mer	0		0	IKZF5	protein_coding
ENSG00000074706	hsa-miR-30a-3p	ENSG00000074706|ENST00000367220	142	-9.11	2	19	75	96	17	0.5882	0.7059	ENSG00000074706|ENST00000367220	hsa-miR-30a-3p	0	15	20	15	20	14343	6mer	x	6mer	0		0	IPCEF1	protein_coding
ENSG00000074706	hsa-miR-30e-3p	ENSG00000074706|ENST00000367220	146	-9.11	2	19	75	96	17	0.6471	0.7059	ENSG00000074706|ENST00000367220	hsa-miR-30e-3p	0	15	20	15	20	14344	6mer	x	6mer	0		0	IPCEF1	protein_coding
ENSG00000197183	hsa-miR-25-3p	ENSG00000197183|ENST00000375678	153	-17.09	2	15	165	188	15	0.8	0.8667	ENSG00000197183|ENST00000375678	hsa-miR-25-3p	0	25	32	25	32	14359	8mer-1a	x	8mer-1a	0		0	NOL4L	protein_coding
ENSG00000197183	hsa-miR-92a-3p	ENSG00000197183|ENST00000375678	150	-21.53	2	21	161	188	25	0.64	0.72	ENSG00000197183|ENST00000375678	hsa-miR-92a-3p	0	25	32	25	32	14360	8mer-1a	x	8mer-1a	0		0	NOL4L	protein_coding
ENSG00000263020	hsa-miR-128-3p	ENSG00000263020|ENST00000375880	148	-19.48	2	15	486	505	13	0.7692	0.9231	ENSG00000263020|ENST00000375880	hsa-miR-128-3p	0	36	42	36	42	14391	7mer-1a	x	7mer-1a	0		0	AL662899.2	protein_coding
ENSG00000263020	hsa-miR-27a-3p	ENSG00000263020|ENST00000375880	163	-20.59	2	16	486	506	14	0.7857	1	ENSG00000263020|ENST00000375880	hsa-miR-27a-3p	0	36	43	36	43	14394	8mer-1a	x	8mer-1a	0		0	AL662899.2	protein_coding
ENSG00000263020	hsa-miR-27b-3p	ENSG00000263020|ENST00000375880	163	-22.19	2	16	486	506	14	0.7857	1	ENSG00000263020|ENST00000375880	hsa-miR-27b-3p	0	36	43	36	43	14395	8mer-1a	x	8mer-1a	0		0	AL662899.2	protein_coding
ENSG00000174307	hsa-miR-150-5p	ENSG00000174307|ENST00000367311	151	-20.96	2	17	1152	1175	17	0.7647	0.7647	ENSG00000174307|ENST00000367311	hsa-miR-150-5p	0	15	21	15	21	14398	7mer-1a	x	7mer-1a	0		0	PHLDA3	protein_coding
ENSG00000116584	hsa-miR-335-5p	ENSG00000116584|ENST00000368315	152	-12.94	2	22	381	404	21	0.6667	0.7143	ENSG00000116584|ENST00000368315	hsa-miR-335-5p	0	17	22	17	22	14418	6mer	x	6mer	0		0	ARHGEF2	protein_coding
ENSG00000120265	hsa-miR-223-3p	ENSG00000120265|ENST00000367384	163	-14.61	2	17	591	613	16	0.875	0.875	ENSG00000120265|ENST00000367384	hsa-miR-223-3p	0	30	36	30	36	14432	7mer-m8	x	7mer-m8	0		0	PCMT1	protein_coding
ENSG00000189241	hsa-miR-148a-3p	ENSG00000189241|ENST00000368608	145	-11.78	2	15	280	302	14	0.7857	0.7857	ENSG00000189241|ENST00000368608	hsa-miR-148a-3p	0	29	35	29	35	14439	7mer-m8	x	7mer-m8	0		0	TSPYL1	protein_coding
ENSG00000189241	hsa-miR-148b-3p	ENSG00000189241|ENST00000368608	141	-11.7	2	16	282	302	14	0.7143	0.7857	ENSG00000189241|ENST00000368608	hsa-miR-148b-3p	0	29	35	29	35	14440	7mer-m8	x	7mer-m8	0		0	TSPYL1	protein_coding
ENSG00000101076	hsa-miR-224-5p	ENSG00000101076|ENST00000372920	152	-21.76	2	24	1494	1523	27	0.6296	0.7407	ENSG00000101076|ENST00000372920	hsa-miR-224-5p	0	25	30	25	30	14441	6mer	x	6mer	0		0	HNF4A	protein_coding
ENSG00000131061	hsa-miR-196a-5p	ENSG00000131061|ENST00000375200	143	-15.81	2	19	632	651	17	0.6471	0.7647	ENSG00000131061|ENST00000375200	hsa-miR-196a-5p	0	19	24	19	24	14450	6mer	x	6mer	0		0	ZNF341	protein_coding
ENSG00000131061	hsa-miR-196b-5p	ENSG00000131061|ENST00000375200	143	-15.79	2	19	632	651	17	0.6471	0.7647	ENSG00000131061|ENST00000375200	hsa-miR-196b-5p	0	19	24	19	24	14451	6mer	x	6mer	0		0	ZNF341	protein_coding
ENSG00000198478	hsa-miR-142-5p	ENSG00000198478|ENST00000369838	155	-9.13	2	20	4080	4101	20	0.8	0.8	ENSG00000198478|ENST00000369838	hsa-miR-142-5p	0	54	60	54	60	14462	7mer-m8	x	7mer-m8	0		0	SH3BGRL2	protein_coding
ENSG00000155265	hsa-miR-150-5p	ENSG00000155265|ENST00000370602	168	-26.06	2	21	537	558	19	0.7368	0.8421	ENSG00000155265|ENST00000370602	hsa-miR-150-5p	0	29	34	29	34	14482	6mer	x	6mer	0		0	GOLGA7B	protein_coding
ENSG00000132716	hsa-miR-15a-5p	ENSG00000132716|ENST00000368074	144	-13.18	2	19	1540	1560	17	0.6471	0.7647	ENSG00000132716|ENST00000368074	hsa-miR-15a-5p	0	30	36	30	36	14485	7mer-m8	x	7mer-m8	0		0	DCAF8	protein_coding
ENSG00000132716	hsa-miR-15b-5p	ENSG00000132716|ENST00000368074	145	-12.59	2	21	1541	1560	19	0.6316	0.7368	ENSG00000132716|ENST00000368074	hsa-miR-15b-5p	0	30	36	30	36	14486	7mer-m8	x	7mer-m8	0		0	DCAF8	protein_coding
ENSG00000107021	hsa-miR-15a-5p	ENSG00000107021|ENST00000372648	150	-17.75	2	20	953	971	18	0.7778	0.7778	ENSG00000107021|ENST00000372648	hsa-miR-15a-5p	0	50	55	50	55	14494	6mer	x	6mer	0		0	TBC1D13	protein_coding
ENSG00000107021	hsa-miR-15b-5p	ENSG00000107021|ENST00000372648	150	-17.87	2	20	953	971	18	0.7778	0.7778	ENSG00000107021|ENST00000372648	hsa-miR-15b-5p	0	50	55	50	55	14495	6mer	x	6mer	0		0	TBC1D13	protein_coding
ENSG00000164414	hsa-miR-142-5p	ENSG00000164414|ENST00000369556	143	-6.01	2	16	781	801	14	0.7143	0.7143	ENSG00000164414|ENST00000369556	hsa-miR-142-5p	0	55	60	55	60	14501	6mer	x	6mer	0		0	SLC35A1	protein_coding
ENSG00000124767	hsa-miR-30a-3p	ENSG00000124767|ENST00000373365	157	-14.45	2	20	1308	1331	20	0.75	0.8	ENSG00000124767|ENST00000373365	hsa-miR-30a-3p	0	23	29	23	29	14504	7mer-1a	x	7mer-1a	0		0	GLO1	protein_coding
ENSG00000124767	hsa-miR-30e-3p	ENSG00000124767|ENST00000373365	149	-11.31	2	20	1308	1331	20	0.7	0.75	ENSG00000124767|ENST00000373365	hsa-miR-30e-3p	0	23	29	23	29	14505	7mer-1a	x	7mer-1a	0		0	GLO1	protein_coding
ENSG00000072501	hsa-miR-584-5p	ENSG00000072501|ENST00000375340	153	-18	2	21	3775	3794	19	0.6316	0.8421	ENSG00000072501|ENST00000375340	hsa-miR-584-5p	0	51	56	51	56	14515	6mer	x	6mer	0		0	SMC1A	protein_coding
ENSG00000185950	hsa-miR-130a-3p	ENSG00000185950|ENST00000375856	153	-13.98	2	14	3272	3293	12	0.8333	0.9167	ENSG00000185950|ENST00000375856	hsa-miR-130a-3p	0	24	30	24	30	14516	7mer-m8	x	7mer-m8	0		0	IRS2	protein_coding
ENSG00000075151	hsa-miR-382-5p	ENSG00000075151|ENST00000374935	154	-10.87	2	21	373	393	19	0.5789	0.8947	ENSG00000075151|ENST00000374935	hsa-miR-382-5p	0	24	29	24	29	14526	6mer	x	6mer	0		0	EIF4G3	protein_coding
ENSG00000024048	hsa-miR-320c	ENSG00000024048|ENST00000372899	149	-13.89	2	14	1944	1963	12	0.75	0.9167	ENSG00000024048|ENST00000372899	hsa-miR-320c	0	51	57	51	57	14539	7mer-1a	x	7mer-1a	0		0	UBR2	protein_coding
ENSG00000024048	hsa-miR-320d	ENSG00000024048|ENST00000372899	149	-13.89	2	14	1945	1963	12	0.75	0.9167	ENSG00000024048|ENST00000372899	hsa-miR-320d	0	51	57	51	57	14540	7mer-1a	x	7mer-1a	0		0	UBR2	protein_coding
ENSG00000024048	hsa-miR-335-5p	ENSG00000024048|ENST00000372899	140	-13.11	2	9	1402	1424	7	1	1	ENSG00000024048|ENST00000372899	hsa-miR-335-5p	0	25	30	25	30	14541	6mer	x	6mer	0		0	UBR2	protein_coding
ENSG00000185760	hsa-miR-192-5p	ENSG00000185760|ENST00000370398	164	-17.23	2	19	275	294	17	0.8235	0.8824	ENSG00000185760|ENST00000370398	hsa-miR-192-5p	0	26	32	26	32	14544	7mer-1a	x	7mer-1a	0		0	KCNQ5	protein_coding
ENSG00000185760	hsa-miR-215-5p	ENSG00000185760|ENST00000370398	164	-19.47	2	19	275	294	17	0.8235	0.8824	ENSG00000185760|ENST00000370398	hsa-miR-215-5p	0	26	32	26	32	14545	7mer-1a	x	7mer-1a	0		0	KCNQ5	protein_coding
ENSG00000138400	hsa-miR-26a-5p	ENSG00000138400|ENST00000374412	150	-9.31	2	11	14	35	9	1	1	ENSG00000138400|ENST00000374412	hsa-miR-26a-5p	0	24	29	24	29	14562	6mer	x	6mer	0		0	MDH1B	protein_coding
ENSG00000166321	hsa-miR-27a-3p	ENSG00000166321|ENST00000372997	147	-16.42	2	12	2	22	10	0.9	0.9	ENSG00000166321|ENST00000372997	hsa-miR-27a-3p	0	19	24	19	24	14563	6mer	x	6mer	0		0	NUDT13	protein_coding
ENSG00000166321	hsa-miR-27b-3p	ENSG00000166321|ENST00000372997	147	-16.42	2	12	2	22	10	0.9	0.9	ENSG00000166321|ENST00000372997	hsa-miR-27b-3p	0	19	24	19	24	14564	6mer	x	6mer	0		0	NUDT13	protein_coding
ENSG00000124205	hsa-miR-27a-3p	ENSG00000124205|ENST00000371028	157	-22	2	19	734	755	18	0.7222	0.8333	ENSG00000124205|ENST00000371028	hsa-miR-27a-3p	0	22	29	22	29	14566	8mer-1a	x	8mer-1a	0		0	EDN3	protein_coding
ENSG00000124205	hsa-miR-27b-3p	ENSG00000124205|ENST00000371028	157	-22	2	19	734	755	18	0.7222	0.8333	ENSG00000124205|ENST00000371028	hsa-miR-27b-3p	0	22	29	22	29	14567	8mer-1a	x	8mer-1a	0		0	EDN3	protein_coding
ENSG00000121940	hsa-miR-339-5p	ENSG00000121940|ENST00000369976	155	-20.81	2	18	293	314	16	0.75	0.875	ENSG00000121940|ENST00000369976	hsa-miR-339-5p	0	21	27	21	27	14580	7mer-1a	x	7mer-1a	0		0	CLCC1	protein_coding
ENSG00000090889	hsa-miR-30a-3p	ENSG00000090889|ENST00000374403	150	-11.61	2	18	117	136	16	0.6875	0.875	ENSG00000090889|ENST00000374403	hsa-miR-30a-3p	0	15	20	15	20	14593	6mer	x	6mer	0		0	KIF4A	protein_coding
ENSG00000090889	hsa-miR-30e-3p	ENSG00000090889|ENST00000374403	150	-11.21	2	18	117	136	16	0.6875	0.875	ENSG00000090889|ENST00000374403	hsa-miR-30e-3p	0	15	20	15	20	14594	6mer	x	6mer	0		0	KIF4A	protein_coding
ENSG00000139218	hsa-miR-27a-3p	ENSG00000139218|ENST00000369367	140	-10.15	2	9	71	91	7	1	1	ENSG00000139218|ENST00000369367	hsa-miR-27a-3p	0	30	35	30	35	14596	6mer	x	6mer	0		0	SCAF11	protein_coding
ENSG00000139218	hsa-miR-27b-3p	ENSG00000139218|ENST00000369367	142	-10.08	2	20	70	91	19	0.6316	0.6842	ENSG00000139218|ENST00000369367	hsa-miR-27b-3p	0	30	35	30	35	14597	6mer	x	6mer	0		0	SCAF11	protein_coding
ENSG00000136828	hsa-miR-361-3p	ENSG00000136828|ENST00000373436	150	-19.04	2	22	338	360	21	0.7143	0.7143	ENSG00000136828|ENST00000373436	hsa-miR-361-3p	0	31	37	31	37	14624	7mer-m8	x	7mer-m8	0		0	RALGPS1	protein_coding
ENSG00000153989	hsa-miR-146a-5p	ENSG00000153989|ENST00000368494	151	-15.46	2	18	3356	3376	16	0.75	0.8125	ENSG00000153989|ENST00000368494	hsa-miR-146a-5p	0	23	28	23	28	14650	6mer	x	6mer	0		0	NUS1	protein_coding
ENSG00000153989	hsa-miR-146b-5p	ENSG00000153989|ENST00000368494	151	-15.29	2	18	3355	3376	16	0.75	0.8125	ENSG00000153989|ENST00000368494	hsa-miR-146b-5p	0	23	28	23	28	14651	6mer	x	6mer	0		0	NUS1	protein_coding
ENSG00000153989	hsa-miR-26a-5p	ENSG00000153989|ENST00000368494	149	-10.85	2	14	129	150	12	0.8333	0.8333	ENSG00000153989|ENST00000368494	hsa-miR-26a-5p	0	51	56	51	56	14654	6mer	x	6mer	0		0	NUS1	protein_coding
ENSG00000117122	hsa-miR-361-3p	ENSG00000117122|ENST00000375534	156	-22.85	2	22	111	134	21	0.6667	0.7619	ENSG00000117122|ENST00000375534	hsa-miR-361-3p	0	17	22	17	22	14663	6mer	x	6mer	0		0	MFAP2	protein_coding
ENSG00000138835	hsa-miR-15a-5p	ENSG00000138835|ENST00000374136	171	-22.61	2	21	363	385	20	0.8	0.85	ENSG00000138835|ENST00000374136	hsa-miR-15a-5p	0	32	38	32	38	14670	7mer-m8	x	7mer-m8	0		0	RGS3	protein_coding
ENSG00000138835	hsa-miR-15b-5p	ENSG00000138835|ENST00000374136	175	-25.17	2	20	364	385	18	0.8333	0.8889	ENSG00000138835|ENST00000374136	hsa-miR-15b-5p	0	32	38	32	38	14671	7mer-m8	x	7mer-m8	0		0	RGS3	protein_coding
ENSG00000159423	hsa-miR-128-3p	ENSG00000159423|ENST00000375341	154	-21.77	2	16	1340	1363	17	0.7647	0.8235	ENSG00000159423|ENST00000375341	hsa-miR-128-3p	0	35	41	35	41	14709	7mer-m8	x	7mer-m8	0		0	ALDH4A1	protein_coding
ENSG00000143376	hsa-miR-128-3p	ENSG00000143376|ENST00000368843	146	-15.86	2	20	2096	2117	19	0.6316	0.7368	ENSG00000143376|ENST00000368843	hsa-miR-128-3p	0	43	49	43	49	14714	7mer-m8	x	7mer-m8	0		0	SNX27	protein_coding
ENSG00000148842	hsa-miR-432-5p	ENSG00000148842|ENST00000369878	155	-21.4	2	22	7404	7425	20	0.65	0.8	ENSG00000148842|ENST00000369878	hsa-miR-432-5p	0	18	25	18	25	14726	8mer-1a	x	8mer-1a	0		0	CNNM2	protein_coding
ENSG00000106852	hsa-miR-181a-5p	ENSG00000106852|ENST00000373755	146	-14.05	2	21	837	858	19	0.6316	0.7368	ENSG00000106852|ENST00000373755	hsa-miR-181a-5p	0	25	31	25	31	14746	7mer-m8	x	7mer-m8	0		0	LHX6	protein_coding
ENSG00000106852	hsa-miR-181b-5p	ENSG00000106852|ENST00000373755	151	-17.94	2	22	837	858	20	0.65	0.75	ENSG00000106852|ENST00000373755	hsa-miR-181b-5p	0	25	31	25	31	14747	7mer-m8	x	7mer-m8	0		0	LHX6	protein_coding
ENSG00000108094	hsa-miR-15a-5p	ENSG00000108094|ENST00000374749	161	-17.59	2	21	403	424	20	0.8	0.8	ENSG00000108094|ENST00000374749	hsa-miR-15a-5p	0	29	34	29	34	14810	6mer	x	6mer	0		0	CUL2	protein_coding
ENSG00000108094	hsa-miR-15b-5p	ENSG00000108094|ENST00000374749	165	-18.57	2	19	402	424	18	0.8333	0.8333	ENSG00000108094|ENST00000374749	hsa-miR-15b-5p	0	29	34	29	34	14811	6mer	x	6mer	0		0	CUL2	protein_coding
ENSG00000048828	hsa-miR-425-5p	ENSG00000048828|ENST00000375389	140	-9.25	2	9	392	414	7	1	1	ENSG00000048828|ENST00000375389	hsa-miR-425-5p	0	28	33	28	33	14824	6mer	x	6mer	0		0	FAM120A	protein_coding
ENSG00000138316	hsa-miR-29a-3p	ENSG00000138316|ENST00000373208	155	-21.99	2	12	630	651	10	1	1	ENSG00000138316|ENST00000373208	hsa-miR-29a-3p	0	35	41	35	41	14827	7mer-m8	x	7mer-m8	0		0	ADAMTS14	protein_coding
ENSG00000138316	hsa-miR-29b-3p	ENSG00000138316|ENST00000373208	152	-19.94	2	22	628	651	21	0.619	0.7619	ENSG00000138316|ENST00000373208	hsa-miR-29b-3p	0	35	41	35	41	14828	7mer-m8	x	7mer-m8	0		0	ADAMTS14	protein_coding
ENSG00000138316	hsa-miR-29c-3p	ENSG00000138316|ENST00000373208	151	-19.29	2	12	630	651	10	0.9	1	ENSG00000138316|ENST00000373208	hsa-miR-29c-3p	0	35	41	35	41	14829	7mer-m8	x	7mer-m8	0		0	ADAMTS14	protein_coding
ENSG00000189410	hsa-miR-339-5p	ENSG00000189410|ENST00000375031	159	-18.04	2	22	665	686	20	0.75	0.75	ENSG00000189410|ENST00000375031	hsa-miR-339-5p	0	51	57	51	57	14840	7mer-1a	x	7mer-1a	0		0	SH2D5	protein_coding
ENSG00000162687	hsa-miR-150-5p	ENSG00000162687|ENST00000367433	143	-14.17	2	21	1734	1757	21	0.619	0.6667	ENSG00000162687|ENST00000367433	hsa-miR-150-5p	0	23	28	23	28	14842	6mer	x	6mer	0		0	KCNT2	protein_coding
ENSG00000148908	hsa-miR-126-5p	ENSG00000148908|ENST00000369103	158	-6.19	2	20	174	196	20	0.75	0.75	ENSG00000148908|ENST00000369103	hsa-miR-126-5p	0	17	22	17	22	14854	6mer	x	6mer	0		0	RGS10	protein_coding
ENSG00000025293	hsa-miR-130a-3p	ENSG00000025293|ENST00000374012	160	-22.35	2	13	2586	2607	11	1	1	ENSG00000025293|ENST00000374012	hsa-miR-130a-3p	0	20	25	20	25	14907	6mer	x	6mer	0		0	PHF20	protein_coding
ENSG00000148158	hsa-miR-25-3p	ENSG00000148158|ENST00000374232	144	-13.53	2	21	924	945	19	0.5789	0.6842	ENSG00000148158|ENST00000374232	hsa-miR-25-3p	0	24	30	24	30	14940	7mer-m8	x	7mer-m8	0		0	SNX30	protein_coding
ENSG00000148158	hsa-miR-92a-3p	ENSG00000148158|ENST00000374232	140	-14.41	2	9	924	945	7	1	1	ENSG00000148158|ENST00000374232	hsa-miR-92a-3p	0	24	30	24	30	14941	7mer-m8	x	7mer-m8	0		0	SNX30	protein_coding
ENSG00000065621	hsa-miR-320c	ENSG00000065621|ENST00000369707	154	-13.41	2	15	1407	1426	13	0.7692	0.9231	ENSG00000065621|ENST00000369707	hsa-miR-320c	0	33	38	33	38	14950	6mer	x	6mer	0		0	GSTO2	protein_coding
ENSG00000065621	hsa-miR-320d	ENSG00000065621|ENST00000369707	154	-13.41	2	15	1408	1426	13	0.7692	0.9231	ENSG00000065621|ENST00000369707	hsa-miR-320d	0	33	38	33	38	14951	6mer	x	6mer	0		0	GSTO2	protein_coding
ENSG00000163349	hsa-miR-221-3p	ENSG00000163349|ENST00000369558	145	-12.55	2	22	3820	3840	20	0.65	0.75	ENSG00000163349|ENST00000369558	hsa-miR-221-3p	0	31	36	31	36	15013	6mer	x	6mer	0		0	HIPK1	protein_coding
ENSG00000143061	hsa-miR-361-3p	ENSG00000143061|ENST00000369486	172	-25.7	2	22	1280	1303	21	0.8095	0.8095	ENSG00000143061|ENST00000369486	hsa-miR-361-3p	0	51	56	51	56	15022	6mer	x	6mer	0		0	IGSF3	protein_coding
ENSG00000050628	hsa-miR-126-5p	ENSG00000050628|ENST00000370924	153	-2.58	2	18	1973	1993	16	0.6875	0.8125	ENSG00000050628|ENST00000370924	hsa-miR-126-5p	0	52	59	52	59	15036	8mer-1a	x	8mer-1a	0		0	PTGER3	protein_coding
ENSG00000119913	hsa-miR-382-5p	ENSG00000119913|ENST00000369422	140	-9.05	2	9	1336	1357	7	1	1	ENSG00000119913|ENST00000369422	hsa-miR-382-5p	0	39	46	39	46	15055	8mer-1a	x	8mer-1a	0		0	TECTB	protein_coding
ENSG00000165775	hsa-miR-30a-3p	ENSG00000165775|ENST00000369498	145	-13.58	2	21	5025	5047	21	0.6667	0.7143	ENSG00000165775|ENST00000369498	hsa-miR-30a-3p	0	34	40	34	40	15059	7mer-m8	x	7mer-m8	0		0	FUNDC2	protein_coding
ENSG00000165775	hsa-miR-30e-3p	ENSG00000165775|ENST00000369498	147	-13.93	2	21	5023	5047	22	0.5909	0.7273	ENSG00000165775|ENST00000369498	hsa-miR-30e-3p	0	34	40	34	40	15060	7mer-m8	x	7mer-m8	0		0	FUNDC2	protein_coding
ENSG00000009694	hsa-miR-30a-3p	ENSG00000009694|ENST00000371130	154	-11.29	2	21	3939	3959	19	0.6842	0.7895	ENSG00000009694|ENST00000371130	hsa-miR-30a-3p	0	25	30	25	30	15075	6mer	x	6mer	0		0	TENM1	protein_coding
ENSG00000009694	hsa-miR-30e-3p	ENSG00000009694|ENST00000371130	158	-10.97	2	21	3939	3959	19	0.7368	0.7895	ENSG00000009694|ENST00000371130	hsa-miR-30e-3p	0	25	30	25	30	15076	6mer	x	6mer	0		0	TENM1	protein_coding
ENSG00000203923	hsa-miR-432-5p	ENSG00000203923|ENST00000370493	149	-15.38	2	22	343	365	20	0.6	0.7	ENSG00000203923|ENST00000370493	hsa-miR-432-5p	0	39	45	39	45	15078	7mer-m8	x	7mer-m8	0		0	SPANXN1	protein_coding
ENSG00000013619	hsa-miR-15a-5p	ENSG00000013619|ENST00000370401	163	-23.34	2	21	775	797	20	0.7	0.85	ENSG00000013619|ENST00000370401	hsa-miR-15a-5p	0	15	20	15	20	15138	6mer	x	6mer	0		0	MAMLD1	protein_coding
ENSG00000013619	hsa-miR-15b-5p	ENSG00000013619|ENST00000370401	162	-21.56	2	20	775	797	19	0.7368	0.8421	ENSG00000013619|ENST00000370401	hsa-miR-15b-5p	0	15	20	15	20	15139	6mer	x	6mer	0		0	MAMLD1	protein_coding
ENSG00000148408	hsa-miR-361-3p	ENSG00000148408|ENST00000371355	149	-22.49	2	19	1164	1189	20	0.65	0.75	ENSG00000148408|ENST00000371355	hsa-miR-361-3p	0	36	42	36	42	15151	7mer-1a	x	7mer-1a	0		0	CACNA1B	protein_coding
ENSG00000131044	hsa-miR-150-5p	ENSG00000131044|ENST00000375921	151	-18.21	2	21	1181	1203	20	0.65	0.75	ENSG00000131044|ENST00000375921	hsa-miR-150-5p	0	31	36	31	36	15152	6mer	x	6mer	0		0	TTLL9	protein_coding
ENSG00000118523	hsa-miR-361-3p	ENSG00000118523|ENST00000367976	152	-22.27	2	22	98	121	21	0.6667	0.7143	ENSG00000118523|ENST00000367976	hsa-miR-361-3p	0	17	24	17	24	15153	8mer-1a	x	8mer-1a	0		0	CCN2	protein_coding
ENSG00000132676	hsa-miR-128-3p	ENSG00000132676|ENST00000368336	156	-19.67	2	18	148	169	17	0.7647	0.8235	ENSG00000132676|ENST00000368336	hsa-miR-128-3p	0	55	60	55	60	15193	6mer	x	6mer	0		0	DAP3	protein_coding
ENSG00000132704	hsa-miR-128-3p	ENSG00000132704|ENST00000368181	142	-11.37	2	11	438	458	9	0.8889	0.8889	ENSG00000132704|ENST00000368181	hsa-miR-128-3p	0	32	39	32	39	15221	8mer-1a	x	8mer-1a	0		0	FCRL2	protein_coding
ENSG00000132704	hsa-miR-27a-3p	ENSG00000132704|ENST00000368181	156	-15.47	2	18	300	321	17	0.7647	0.8235	ENSG00000132704|ENST00000368181	hsa-miR-27a-3p	0	33	39	33	39	15222	7mer-m8	x	7mer-m8	0		0	FCRL2	protein_coding
ENSG00000132704	hsa-miR-27b-3p	ENSG00000132704|ENST00000368181	156	-15.58	2	18	300	321	17	0.7647	0.8235	ENSG00000132704|ENST00000368181	hsa-miR-27b-3p	0	33	39	33	39	15223	7mer-m8	x	7mer-m8	0		0	FCRL2	protein_coding
ENSG00000124151	hsa-miR-142-5p	ENSG00000124151|ENST00000372004	143	-9.85	2	19	703	723	18	0.7222	0.7222	ENSG00000124151|ENST00000372004	hsa-miR-142-5p	0	15	20	15	20	15252	6mer	x	6mer	0		0	NCOA3	protein_coding
ENSG00000147059	hsa-miR-155-5p	ENSG00000147059|ENST00000374908	145	-12.71	2	18	106	129	16	0.625	0.75	ENSG00000147059|ENST00000374908	hsa-miR-155-5p	0	29	34	29	34	15258	6mer	x	6mer	0		0	SPIN2A	protein_coding
ENSG00000117707	hsa-miR-130a-3p	ENSG00000117707|ENST00000366958	152	-13.29	2	21	4287	4308	19	0.6316	0.7368	ENSG00000117707|ENST00000366958	hsa-miR-130a-3p	0	44	49	44	49	15333	6mer	x	6mer	0		0	PROX1	protein_coding
ENSG00000204217	hsa-miR-146a-5p	ENSG00000204217|ENST00000374574	148	-12.23	2	13	2336	2357	11	0.8182	0.9091	ENSG00000204217|ENST00000374574	hsa-miR-146a-5p	0	15	21	15	21	15365	7mer-m8	x	7mer-m8	0		0	BMPR2	protein_coding
ENSG00000204217	hsa-miR-146b-5p	ENSG00000204217|ENST00000374574	148	-10.76	2	13	2335	2357	11	0.8182	0.9091	ENSG00000204217|ENST00000374574	hsa-miR-146b-5p	0	15	21	15	21	15366	7mer-m8	x	7mer-m8	0		0	BMPR2	protein_coding
ENSG00000196182	hsa-miR-27a-3p	ENSG00000196182|ENST00000373129	161	-19.32	2	18	1387	1407	16	0.75	0.875	ENSG00000196182|ENST00000373129	hsa-miR-27a-3p	0	27	32	27	32	15434	6mer	x	6mer	0		0	STK40	protein_coding
ENSG00000196182	hsa-miR-27b-3p	ENSG00000196182|ENST00000373129	163	-19.32	2	20	1387	1407	18	0.7222	0.8333	ENSG00000196182|ENST00000373129	hsa-miR-27b-3p	0	27	32	27	32	15435	6mer	x	6mer	0		0	STK40	protein_coding
ENSG00000143393	hsa-miR-23a-3p	ENSG00000143393|ENST00000368873	143	-11.09	2	13	276	297	12	0.8333	0.8333	ENSG00000143393|ENST00000368873	hsa-miR-23a-3p	0	26	32	26	32	15445	7mer-m8	x	7mer-m8	0		0	PI4KB	protein_coding
ENSG00000143393	hsa-miR-23b-3p	ENSG00000143393|ENST00000368873	143	-11.98	2	13	274	297	12	0.8333	0.8333	ENSG00000143393|ENST00000368873	hsa-miR-23b-3p	0	26	32	26	32	15446	7mer-m8	x	7mer-m8	0		0	PI4KB	protein_coding
ENSG00000143393	hsa-miR-23c	ENSG00000143393|ENST00000368873	143	-11.89	2	13	275	297	12	0.8333	0.8333	ENSG00000143393|ENST00000368873	hsa-miR-23c	0	26	32	26	32	15447	7mer-m8	x	7mer-m8	0		0	PI4KB	protein_coding
ENSG00000169242	hsa-miR-21-5p	ENSG00000169242|ENST00000368407	148	-14.15	2	20	108	127	18	0.7222	0.7222	ENSG00000169242|ENST00000368407	hsa-miR-21-5p	0	15	21	15	21	15457	7mer-m8	x	7mer-m8	0		0	EFNA1	protein_coding
ENSG00000107187	hsa-miR-181a-5p	ENSG00000107187|ENST00000371748	146	-16.86	2	21	983	1004	19	0.5263	0.8421	ENSG00000107187|ENST00000371748	hsa-miR-181a-5p	0	43	49	43	49	15461	7mer-m8	x	7mer-m8	0		0	LHX3	protein_coding
ENSG00000107187	hsa-miR-181b-5p	ENSG00000107187|ENST00000371748	152	-22.11	2	22	979	1004	23	0.6087	0.7391	ENSG00000107187|ENST00000371748	hsa-miR-181b-5p	0	43	49	43	49	15462	7mer-m8	x	7mer-m8	0		0	LHX3	protein_coding
ENSG00000124120	hsa-miR-15a-5p	ENSG00000124120|ENST00000372904	151	-14.9	2	20	4691	4712	18	0.6111	0.7778	ENSG00000124120|ENST00000372904	hsa-miR-15a-5p	0	22	27	22	27	15500	6mer	x	6mer	0		0	TTPAL	protein_coding
ENSG00000124120	hsa-miR-15b-5p	ENSG00000124120|ENST00000372904	159	-22.56	2	20	4691	4712	18	0.6667	0.8333	ENSG00000124120|ENST00000372904	hsa-miR-15b-5p	0	22	27	22	27	15501	6mer	x	6mer	0		0	TTPAL	protein_coding
ENSG00000116761	hsa-miR-27a-3p	ENSG00000116761|ENST00000370938	143	-14.91	2	13	467	488	12	0.75	0.9167	ENSG00000116761|ENST00000370938	hsa-miR-27a-3p	0	21	26	21	26	15506	6mer	x	6mer	0		0	CTH	protein_coding
ENSG00000116761	hsa-miR-27b-3p	ENSG00000116761|ENST00000370938	143	-14.96	2	13	467	488	12	0.75	0.9167	ENSG00000116761|ENST00000370938	hsa-miR-27b-3p	0	21	26	21	26	15507	6mer	x	6mer	0		0	CTH	protein_coding
ENSG00000155659	hsa-miR-199a-5p	ENSG00000155659|ENST00000374737	145	-13.16	2	10	102	124	8	1	1	ENSG00000155659|ENST00000374737	hsa-miR-199a-5p	0	15	21	15	21	15519	7mer-1a	x	7mer-1a	0		0	VSIG4	protein_coding
ENSG00000102384	hsa-miR-30a-3p	ENSG00000102384|ENST00000372927	153	-9.91	2	19	679	701	18	0.6667	0.8333	ENSG00000102384|ENST00000372927	hsa-miR-30a-3p	0	28	34	28	34	15532	7mer-m8	x	7mer-m8	0		0	CENPI	protein_coding
ENSG00000102384	hsa-miR-30e-3p	ENSG00000102384|ENST00000372927	157	-9.64	2	19	679	701	18	0.7222	0.8333	ENSG00000102384|ENST00000372927	hsa-miR-30e-3p	0	28	34	28	34	15533	7mer-m8	x	7mer-m8	0		0	CENPI	protein_coding
ENSG00000143147	hsa-miR-150-5p	ENSG00000143147|ENST00000367838	149	-17.85	2	21	64	86	21	0.6667	0.7619	ENSG00000143147|ENST00000367838	hsa-miR-150-5p	0	38	43	38	43	15535	6mer	x	6mer	0		0	GPR161	protein_coding
ENSG00000183317	hsa-miR-7847-3p	ENSG00000183317|ENST00000373048	144	-18.78	2	15	2115	2134	13	0.7692	0.8462	ENSG00000183317|ENST00000373048	hsa-miR-7847-3p	0	33	38	33	38	15548	6mer	x	6mer	0		0	EPHA10	protein_coding
ENSG00000163393	hsa-miR-584-5p	ENSG00000163393|ENST00000369503	153	-18.95	2	21	2664	2685	20	0.65	0.85	ENSG00000163393|ENST00000369503	hsa-miR-584-5p	0	42	48	42	48	15570	7mer-m8	x	7mer-m8	0		0	SLC22A15	protein_coding
ENSG00000101882	hsa-miR-150-5p	ENSG00000101882|ENST00000371410	140	-15.8	2	9	554	575	7	1	1	ENSG00000101882|ENST00000371410	hsa-miR-150-5p	0	41	46	41	46	15574	6mer	x	6mer	0		0	NKAP	protein_coding
ENSG00000147246	hsa-miR-151a-3p	ENSG00000147246|ENST00000371950	157	-17.2	2	20	1944	1963	18	0.7778	0.7778	ENSG00000147246|ENST00000371950	hsa-miR-151a-3p	0	23	28	23	28	15584	6mer	x	6mer	0		0	HTR2C	protein_coding
ENSG00000152061	hsa-miR-130a-3p	ENSG00000152061|ENST00000367690	142	-12.57	2	11	577	598	9	0.8889	0.8889	ENSG00000152061|ENST00000367690	hsa-miR-130a-3p	0	42	47	42	47	15602	6mer	x	6mer	0		0	RABGAP1L	protein_coding
ENSG00000125977	hsa-miR-196a-5p	ENSG00000125977|ENST00000374980	145	-12.92	2	20	580	600	18	0.5556	0.8333	ENSG00000125977|ENST00000374980	hsa-miR-196a-5p	0	38	44	38	44	15628	7mer-m8	x	7mer-m8	0		0	EIF2S2	protein_coding
ENSG00000125977	hsa-miR-196b-5p	ENSG00000125977|ENST00000374980	140	-13.08	2	9	579	600	7	1	1	ENSG00000125977|ENST00000374980	hsa-miR-196b-5p	0	38	44	38	44	15629	7mer-m8	x	7mer-m8	0		0	EIF2S2	protein_coding
ENSG00000076864	hsa-miR-361-3p	ENSG00000076864|ENST00000374763	161	-22.57	2	22	266	288	20	0.65	0.8	ENSG00000076864|ENST00000374763	hsa-miR-361-3p	0	18	23	18	23	15637	6mer	x	6mer	0		0	RAP1GAP	protein_coding
ENSG00000112715	hsa-miR-150-5p	ENSG00000112715|ENST00000372064	159	-23.05	2	21	484	506	20	0.75	0.75	ENSG00000112715|ENST00000372064	hsa-miR-150-5p	0	23	29	23	29	15646	7mer-1a	x	7mer-1a	0		0	VEGFA	protein_coding
ENSG00000143367	hsa-miR-15a-5p	ENSG00000143367|ENST00000368848	143	-16.2	2	18	13	33	16	0.625	0.8125	ENSG00000143367|ENST00000368848	hsa-miR-15a-5p	0	55	60	55	60	15648	6mer	x	6mer	0		0	TUFT1	protein_coding
ENSG00000143367	hsa-miR-15b-5p	ENSG00000143367|ENST00000368848	143	-17.3	2	18	13	33	16	0.625	0.8125	ENSG00000143367|ENST00000368848	hsa-miR-15b-5p	0	55	60	55	60	15649	6mer	x	6mer	0		0	TUFT1	protein_coding
ENSG00000118217	hsa-miR-150-5p	ENSG00000118217|ENST00000367942	161	-27.17	2	20	2535	2555	18	0.7222	0.8889	ENSG00000118217|ENST00000367942	hsa-miR-150-5p	0	21	26	21	26	15665	6mer	x	6mer	0		0	ATF6	protein_coding
ENSG00000132716	hsa-miR-192-5p	ENSG00000132716|ENST00000368073	145	-15.04	2	10	654	674	8	1	1	ENSG00000132716|ENST00000368073	hsa-miR-192-5p	0	38	43	38	43	15667	6mer	x	6mer	0		0	DCAF8	protein_coding
ENSG00000132716	hsa-miR-215-5p	ENSG00000132716|ENST00000368073	145	-10.94	2	10	654	674	8	1	1	ENSG00000132716|ENST00000368073	hsa-miR-215-5p	0	38	43	38	43	15668	6mer	x	6mer	0		0	DCAF8	protein_coding
ENSG00000196090	hsa-miR-150-5p	ENSG00000196090|ENST00000373190	154	-19.13	2	20	2119	2141	19	0.7368	0.7368	ENSG00000196090|ENST00000373190	hsa-miR-150-5p	0	33	38	33	38	15669	6mer	x	6mer	0		0	PTPRT	protein_coding
ENSG00000196865	hsa-miR-15a-5p	ENSG00000196865|ENST00000369301	147	-13.37	2	16	235	256	14	0.7143	0.7857	ENSG00000196865|ENST00000369301	hsa-miR-15a-5p	0	48	53	48	53	15705	6mer	x	6mer	0		0	NHLRC2	protein_coding
ENSG00000196865	hsa-miR-15b-5p	ENSG00000196865|ENST00000369301	146	-15.47	2	20	233	256	20	0.6	0.75	ENSG00000196865|ENST00000369301	hsa-miR-15b-5p	0	48	53	48	53	15706	6mer	x	6mer	0		0	NHLRC2	protein_coding
ENSG00000196865	hsa-miR-335-5p	ENSG00000196865|ENST00000369301	156	-14.89	2	15	5660	5681	13	0.9231	0.9231	ENSG00000196865|ENST00000369301	hsa-miR-335-5p	0	23	28	23	28	15707	6mer	x	6mer	0		0	NHLRC2	protein_coding
ENSG00000165813	hsa-miR-30a-3p	ENSG00000165813|ENST00000369287	151	-18.98	2	21	164	186	20	0.65	0.75	ENSG00000165813|ENST00000369287	hsa-miR-30a-3p	0	33	38	33	38	15708	6mer	x	6mer	0		0	CCDC186	protein_coding
ENSG00000165813	hsa-miR-30e-3p	ENSG00000165813|ENST00000369287	155	-19.49	2	21	164	186	20	0.7	0.75	ENSG00000165813|ENST00000369287	hsa-miR-30e-3p	0	33	38	33	38	15709	6mer	x	6mer	0		0	CCDC186	protein_coding
ENSG00000126070	hsa-miR-361-3p	ENSG00000126070|ENST00000373191	162	-23.64	2	22	12125	12147	21	0.7143	0.8571	ENSG00000126070|ENST00000373191	hsa-miR-361-3p	0	33	39	33	39	15717	7mer-1a	x	7mer-1a	0		0	AGO3	protein_coding
ENSG00000155966	hsa-miR-27a-3p	ENSG00000155966|ENST00000370460	153	-14.09	2	18	5071	5091	16	0.75	0.75	ENSG00000155966|ENST00000370460	hsa-miR-27a-3p	0	43	49	43	49	15723	7mer-1a	x	7mer-1a	0		0	AFF2	protein_coding
ENSG00000155966	hsa-miR-27b-3p	ENSG00000155966|ENST00000370460	153	-14.09	2	18	5071	5091	16	0.75	0.75	ENSG00000155966|ENST00000370460	hsa-miR-27b-3p	0	43	49	43	49	15724	7mer-1a	x	7mer-1a	0		0	AFF2	protein_coding
ENSG00000158859	hsa-miR-150-5p	ENSG00000158859|ENST00000367996	142	-15.65	2	20	2757	2780	20	0.65	0.65	ENSG00000158859|ENST00000367996	hsa-miR-150-5p	0	49	54	49	54	15727	6mer	x	6mer	0		0	ADAMTS4	protein_coding
ENSG00000158859	hsa-miR-625-3p	ENSG00000158859|ENST00000367996	155	-16.73	2	21	2262	2285	21	0.7143	0.7143	ENSG00000158859|ENST00000367996	hsa-miR-625-3p	0	22	28	22	28	15730	7mer-m8	x	7mer-m8	0		0	ADAMTS4	protein_coding
ENSG00000152104	hsa-miR-130a-3p	ENSG00000152104|ENST00000366956	140	-14.94	2	9	9017	9038	7	1	1	ENSG00000152104|ENST00000366956	hsa-miR-130a-3p	0	48	53	48	53	15731	6mer	x	6mer	0		0	PTPN14	protein_coding
ENSG00000131725	hsa-miR-30a-3p	ENSG00000131725|ENST00000371822	147	-11.94	2	21	38	60	20	0.6	0.75	ENSG00000131725|ENST00000371822	hsa-miR-30a-3p	0	40	45	40	45	15742	6mer	x	6mer	0		0	WDR44	protein_coding
ENSG00000131725	hsa-miR-30e-3p	ENSG00000131725|ENST00000371822	151	-11.53	2	21	38	60	20	0.65	0.75	ENSG00000131725|ENST00000371822	hsa-miR-30e-3p	0	40	45	40	45	15743	6mer	x	6mer	0		0	WDR44	protein_coding
ENSG00000181704	hsa-miR-126-5p	ENSG00000181704|ENST00000374622	159	-14.56	2	17	3641	3662	16	0.8125	0.875	ENSG00000181704|ENST00000374622	hsa-miR-126-5p	0	18	24	18	24	15745	7mer-1a	x	7mer-1a	0		0	YIPF6	protein_coding
ENSG00000160293	hsa-miR-150-5p	ENSG00000160293|ENST00000371850	140	-14.46	2	9	661	682	7	1	1	ENSG00000160293|ENST00000371850	hsa-miR-150-5p	0	23	29	23	29	15792	7mer-1a	x	7mer-1a	0		0	VAV2	protein_coding
ENSG00000160293	hsa-miR-335-5p	ENSG00000160293|ENST00000371850	149	-14.12	2	14	1018	1040	12	0.8333	0.8333	ENSG00000160293|ENST00000371850	hsa-miR-335-5p	0	30	36	30	36	15793	7mer-m8	x	7mer-m8	0		0	VAV2	protein_coding
ENSG00000150337	hsa-miR-432-5p	ENSG00000150337|ENST00000369168	144	-18.04	2	20	720	743	20	0.65	0.75	ENSG00000150337|ENST00000369168	hsa-miR-432-5p	0	25	30	25	30	15802	6mer	x	6mer	0		0	FCGR1A	protein_coding
ENSG00000181264	hsa-miR-130a-3p	ENSG00000181264|ENST00000375095	141	-14.33	2	11	3048	3070	10	0.9	0.9	ENSG00000181264|ENST00000375095	hsa-miR-130a-3p	0	34	39	34	39	15819	6mer	x	6mer	0		0	TLCD5	protein_coding
ENSG00000181264	hsa-miR-148a-3p	ENSG00000181264|ENST00000375095	156	-16.67	2	21	3050	3071	19	0.6842	0.7368	ENSG00000181264|ENST00000375095	hsa-miR-148a-3p	0	34	40	34	40	15820	7mer-m8	x	7mer-m8	0		0	TLCD5	protein_coding
ENSG00000181264	hsa-miR-148b-3p	ENSG00000181264|ENST00000375095	156	-17.35	2	21	3050	3071	19	0.6842	0.7368	ENSG00000181264|ENST00000375095	hsa-miR-148b-3p	0	34	40	34	40	15821	7mer-m8	x	7mer-m8	0		0	TLCD5	protein_coding
ENSG00000115827	hsa-miR-155-5p	ENSG00000115827|ENST00000375255	150	-14.44	2	21	934	960	22	0.6364	0.7727	ENSG00000115827|ENST00000375255	hsa-miR-155-5p	0	22	28	22	28	15827	7mer-1a	x	7mer-1a	0		0	DCAF17	protein_coding
ENSG00000137166	hsa-miR-27a-3p	ENSG00000137166|ENST00000373057	146	-16.32	2	16	459	481	16	0.75	0.75	ENSG00000137166|ENST00000373057	hsa-miR-27a-3p	0	48	55	48	55	15835	8mer-1a	x	8mer-1a	0		0	FOXP4	protein_coding
ENSG00000137166	hsa-miR-27b-3p	ENSG00000137166|ENST00000373057	146	-15.44	2	16	459	481	16	0.75	0.75	ENSG00000137166|ENST00000373057	hsa-miR-27b-3p	0	48	55	48	55	15836	8mer-1a	x	8mer-1a	0		0	FOXP4	protein_coding
ENSG00000130717	hsa-miR-24-3p	ENSG00000130717|ENST00000372211	152	-24.15	2	21	40	60	20	0.7	0.8	ENSG00000130717|ENST00000372211	hsa-miR-24-3p	0	45	50	45	50	15854	6mer	x	6mer	0		0	UCK1	protein_coding
ENSG00000188690	hsa-miR-128-3p	ENSG00000188690|ENST00000368778	145	-18.38	2	19	299	316	17	0.7647	0.7647	ENSG00000188690|ENST00000368778	hsa-miR-128-3p	0	26	32	26	32	15858	7mer-m8	x	7mer-m8	0		0	UROS	protein_coding
ENSG00000112333	hsa-miR-148a-3p	ENSG00000112333|ENST00000368983	140	-16.26	2	9	207	228	7	1	1	ENSG00000112333|ENST00000368983	hsa-miR-148a-3p	0	15	21	15	21	15872	7mer-m8	x	7mer-m8	0		0	NR2E1	protein_coding
ENSG00000112333	hsa-miR-148b-3p	ENSG00000112333|ENST00000368983	140	-16.13	2	9	207	228	7	1	1	ENSG00000112333|ENST00000368983	hsa-miR-148b-3p	0	15	21	15	21	15873	7mer-m8	x	7mer-m8	0		0	NR2E1	protein_coding
ENSG00000112333	hsa-miR-30a-3p	ENSG00000112333|ENST00000368983	148	-14.34	2	18	209	231	17	0.6471	0.8235	ENSG00000112333|ENST00000368983	hsa-miR-30a-3p	0	53	58	53	58	15874	6mer	x	6mer	0		0	NR2E1	protein_coding
ENSG00000112333	hsa-miR-30e-3p	ENSG00000112333|ENST00000368983	148	-12.97	2	18	209	231	17	0.6471	0.8235	ENSG00000112333|ENST00000368983	hsa-miR-30e-3p	0	53	58	53	58	15875	6mer	x	6mer	0		0	NR2E1	protein_coding
ENSG00000164434	hsa-miR-432-5p	ENSG00000164434|ENST00000368444	156	-17.11	2	22	129	154	23	0.6087	0.7826	ENSG00000164434|ENST00000368444	hsa-miR-432-5p	0	39	44	39	44	15888	6mer	x	6mer	0		0	FABP7	protein_coding
ENSG00000119397	hsa-miR-24-3p	ENSG00000119397|ENST00000373855	145	-18.92	2	18	216	235	16	0.75	0.8125	ENSG00000119397|ENST00000373855	hsa-miR-24-3p	0	20	26	20	26	15956	7mer-1a	x	7mer-1a	0		0	CNTRL	protein_coding
ENSG00000116218	hsa-miR-320c	ENSG00000116218|ENST00000367616	140	-8.41	2	9	220	239	7	1	1	ENSG00000116218|ENST00000367616	hsa-miR-320c	0	39	44	39	44	15957	6mer	x	6mer	0		0	NPHS2	protein_coding
ENSG00000116218	hsa-miR-320d	ENSG00000116218|ENST00000367616	140	-8.41	2	9	221	239	7	1	1	ENSG00000116218|ENST00000367616	hsa-miR-320d	0	39	44	39	44	15958	6mer	x	6mer	0		0	NPHS2	protein_coding
ENSG00000143494	hsa-miR-27a-3p	ENSG00000143494|ENST00000366968	140	-11.59	2	9	2827	2847	7	1	1	ENSG00000143494|ENST00000366968	hsa-miR-27a-3p	0	24	29	24	29	15971	6mer	x	6mer	0		0	VASH2	protein_coding
ENSG00000143494	hsa-miR-27b-3p	ENSG00000143494|ENST00000366968	140	-11.6	2	9	2827	2847	7	1	1	ENSG00000143494|ENST00000366968	hsa-miR-27b-3p	0	24	29	24	29	15972	6mer	x	6mer	0		0	VASH2	protein_coding
ENSG00000108001	hsa-miR-27a-3p	ENSG00000108001|ENST00000368648	162	-21.82	2	16	788	809	15	0.8667	0.9333	ENSG00000108001|ENST00000368648	hsa-miR-27a-3p	0	18	23	18	23	16013	6mer	x	6mer	0		0	EBF3	protein_coding
ENSG00000108001	hsa-miR-27b-3p	ENSG00000108001|ENST00000368648	162	-23.82	2	16	788	809	15	0.8667	0.9333	ENSG00000108001|ENST00000368648	hsa-miR-27b-3p	0	18	23	18	23	16014	6mer	x	6mer	0		0	EBF3	protein_coding
ENSG00000112078	hsa-miR-30a-3p	ENSG00000112078|ENST00000373731	150	-13.79	2	20	396	419	20	0.7	0.7	ENSG00000112078|ENST00000373731	hsa-miR-30a-3p	0	20	25	20	25	16041	6mer	x	6mer	0		0	KCTD20	protein_coding
ENSG00000112078	hsa-miR-30e-3p	ENSG00000112078|ENST00000373731	145	-9.1	2	18	398	419	16	0.625	0.75	ENSG00000112078|ENST00000373731	hsa-miR-30e-3p	0	20	25	20	25	16042	6mer	x	6mer	0		0	KCTD20	protein_coding
ENSG00000112078	hsa-miR-7847-3p	ENSG00000112078|ENST00000373731	150	-26.62	2	20	2364	2386	20	0.7	0.7	ENSG00000112078|ENST00000373731	hsa-miR-7847-3p	0	30	35	30	35	16043	6mer	x	6mer	0		0	KCTD20	protein_coding
ENSG00000124203	hsa-miR-150-5p	ENSG00000124203|ENST00000371030	140	-11.27	2	9	180	201	7	1	1	ENSG00000124203|ENST00000371030	hsa-miR-150-5p	0	35	40	35	40	16046	6mer	x	6mer	0		0	ZNF831	protein_coding
ENSG00000102081	hsa-miR-335-5p	ENSG00000102081|ENST00000370471	156	-15.48	2	21	1664	1686	19	0.6842	0.7368	ENSG00000102081|ENST00000370471	hsa-miR-335-5p	0	33	38	33	38	16097	6mer	x	6mer	0		0	FMR1	protein_coding
ENSG00000196090	hsa-miR-361-3p	ENSG00000196090|ENST00000373198	160	-25.04	2	19	2134	2155	17	0.7647	0.8824	ENSG00000196090|ENST00000373198	hsa-miR-361-3p	0	43	48	43	48	16105	6mer	x	6mer	0		0	PTPRT	protein_coding
ENSG00000157193	hsa-miR-361-3p	ENSG00000157193|ENST00000371454	140	-18.15	2	9	353	375	7	1	1	ENSG00000157193|ENST00000371454	hsa-miR-361-3p	0	34	40	34	40	16112	7mer-1a	x	7mer-1a	0		0	LRP8	protein_coding
ENSG00000010810	hsa-miR-361-3p	ENSG00000010810|ENST00000368682	145	-18.88	2	22	1022	1041	20	0.6	0.75	ENSG00000010810|ENST00000368682	hsa-miR-361-3p	0	53	59	53	59	16120	7mer-m8	x	7mer-m8	0		0	FYN	protein_coding
ENSG00000170927	hsa-miR-181a-5p	ENSG00000170927|ENST00000371117	154	-14.27	2	16	3750	3774	16	0.8125	0.8125	ENSG00000170927|ENST00000371117	hsa-miR-181a-5p	0	42	48	42	48	16128	7mer-m8	x	7mer-m8	0		0	PKHD1	protein_coding
ENSG00000170927	hsa-miR-181b-5p	ENSG00000170927|ENST00000371117	150	-13.5	2	16	3750	3774	16	0.75	0.8125	ENSG00000170927|ENST00000371117	hsa-miR-181b-5p	0	42	48	42	48	16129	7mer-m8	x	7mer-m8	0		0	PKHD1	protein_coding
ENSG00000162383	hsa-miR-27a-3p	ENSG00000162383|ENST00000371491	140	-16.01	2	9	474	494	7	1	1	ENSG00000162383|ENST00000371491	hsa-miR-27a-3p	0	20	26	20	26	16133	7mer-m8	x	7mer-m8	0		0	SLC1A7	protein_coding
ENSG00000162383	hsa-miR-27b-3p	ENSG00000162383|ENST00000371491	143	-14.62	2	20	477	494	18	0.6667	0.7222	ENSG00000162383|ENST00000371491	hsa-miR-27b-3p	0	20	26	20	26	16134	7mer-m8	x	7mer-m8	0		0	SLC1A7	protein_coding
ENSG00000162702	hsa-miR-23a-3p	ENSG00000162702|ENST00000367352	141	-11.31	2	10	86	106	8	0.875	1	ENSG00000162702|ENST00000367352	hsa-miR-23a-3p	0	18	24	18	24	16137	7mer-1a	x	7mer-1a	0		0	ZNF281	protein_coding
ENSG00000162702	hsa-miR-23b-3p	ENSG00000162702|ENST00000367352	141	-12.89	2	10	84	106	8	0.875	1	ENSG00000162702|ENST00000367352	hsa-miR-23b-3p	0	18	24	18	24	16138	7mer-1a	x	7mer-1a	0		0	ZNF281	protein_coding
ENSG00000162702	hsa-miR-23c	ENSG00000162702|ENST00000367352	145	-11.13	2	18	85	106	16	0.625	0.75	ENSG00000162702|ENST00000367352	hsa-miR-23c	0	18	24	18	24	16139	7mer-1a	x	7mer-1a	0		0	ZNF281	protein_coding
ENSG00000132793	hsa-miR-15a-5p	ENSG00000132793|ENST00000373257	145	-19.71	2	10	1214	1235	8	1	1	ENSG00000132793|ENST00000373257	hsa-miR-15a-5p	0	44	49	44	49	16147	6mer	x	6mer	0		0	LPIN3	protein_coding
ENSG00000132793	hsa-miR-15b-5p	ENSG00000132793|ENST00000373257	145	-18.68	2	10	1214	1235	8	1	1	ENSG00000132793|ENST00000373257	hsa-miR-15b-5p	0	44	49	44	49	16148	6mer	x	6mer	0		0	LPIN3	protein_coding
ENSG00000132793	hsa-miR-425-5p	ENSG00000132793|ENST00000373257	157	-20.09	2	22	67	89	20	0.6	0.8	ENSG00000132793|ENST00000373257	hsa-miR-425-5p	0	24	31	24	31	16149	8mer-1a	x	8mer-1a	0		0	LPIN3	protein_coding
ENSG00000134376	hsa-miR-15a-5p	ENSG00000134376|ENST00000367397	158	-18.22	2	21	5681	5704	21	0.6667	0.8571	ENSG00000134376|ENST00000367397	hsa-miR-15a-5p	0	51	57	51	57	16152	7mer-m8	x	7mer-m8	0		0	CRB1	protein_coding
ENSG00000134376	hsa-miR-15b-5p	ENSG00000134376|ENST00000367397	170	-20.68	2	21	5681	5704	21	0.7619	0.9048	ENSG00000134376|ENST00000367397	hsa-miR-15b-5p	0	51	57	51	57	16153	7mer-m8	x	7mer-m8	0		0	CRB1	protein_coding
ENSG00000163431	hsa-miR-361-3p	ENSG00000163431|ENST00000367288	151	-24.37	2	17	1528	1551	16	0.75	0.8125	ENSG00000163431|ENST00000367288	hsa-miR-361-3p	0	44	49	44	49	16155	6mer	x	6mer	0		0	LMOD1	protein_coding
ENSG00000203867	hsa-miR-361-3p	ENSG00000203867|ENST00000369519	142	-19.96	2	20	1344	1368	20	0.55	0.75	ENSG00000203867|ENST00000369519	hsa-miR-361-3p	0	47	52	47	52	16165	6mer	x	6mer	0		0	RBM20	protein_coding
ENSG00000148225	hsa-miR-130a-3p	ENSG00000148225|ENST00000374195	160	-13.41	2	17	902	923	15	0.8	0.8667	ENSG00000148225|ENST00000374195	hsa-miR-130a-3p	0	48	53	48	53	16166	6mer	x	6mer	0		0	WDR31	protein_coding
ENSG00000143190	hsa-miR-199a-5p	ENSG00000143190|ENST00000367866	150	-18.99	2	20	9858	9882	20	0.65	0.75	ENSG00000143190|ENST00000367866	hsa-miR-199a-5p	0	46	51	46	51	16179	6mer	x	6mer	0		0	POU2F1	protein_coding
ENSG00000116260	hsa-miR-150-5p	ENSG00000116260|ENST00000367600	140	-15.54	2	9	641	662	7	1	1	ENSG00000116260|ENST00000367600	hsa-miR-150-5p	0	45	51	45	51	16206	7mer-m8	x	7mer-m8	0		0	QSOX1	protein_coding
ENSG00000156531	hsa-miR-335-5p	ENSG00000156531|ENST00000370799	147	-16.52	2	12	2204	2226	10	0.9	0.9	ENSG00000156531|ENST00000370799	hsa-miR-335-5p	0	21	27	21	27	16211	7mer-1a	x	7mer-1a	0		0	PHF6	protein_coding
ENSG00000158773	hsa-miR-339-5p	ENSG00000158773|ENST00000368021	160	-31.49	2	18	84	109	19	0.7368	0.8421	ENSG00000158773|ENST00000368021	hsa-miR-339-5p	0	46	52	46	52	16232	7mer-m8	x	7mer-m8	0		0	USF1	protein_coding
ENSG00000111880	hsa-miR-664a-5p	ENSG00000111880|ENST00000369485	159	-17.48	2	18	53	75	16	0.8125	0.875	ENSG00000111880|ENST00000369485	hsa-miR-664a-5p	0	43	48	43	48	16256	6mer	x	6mer	0		0	RNGTT	protein_coding
ENSG00000185745	hsa-miR-15a-5p	ENSG00000185745|ENST00000371804	152	-16.72	2	21	2755	2774	19	0.6842	0.8421	ENSG00000185745|ENST00000371804	hsa-miR-15a-5p	0	21	27	21	27	16257	7mer-m8	x	7mer-m8	0		0	IFIT1	protein_coding
ENSG00000185745	hsa-miR-15b-5p	ENSG00000185745|ENST00000371804	157	-15.27	2	21	2755	2774	19	0.7368	0.7895	ENSG00000185745|ENST00000371804	hsa-miR-15b-5p	0	21	27	21	27	16258	7mer-m8	x	7mer-m8	0		0	IFIT1	protein_coding
ENSG00000135341	hsa-miR-664a-5p	ENSG00000135341|ENST00000369327	157	-20.88	2	23	2819	2844	23	0.6522	0.7391	ENSG00000135341|ENST00000369327	hsa-miR-664a-5p	0	42	48	42	48	16272	7mer-m8	x	7mer-m8	0		0	MAP3K7	protein_coding
ENSG00000204179	hsa-miR-21-5p	ENSG00000204179|ENST00000374346	142	-8.16	2	11	1184	1205	9	0.8889	0.8889	ENSG00000204179|ENST00000374346	hsa-miR-21-5p	0	36	41	36	41	16282	6mer	x	6mer	0		0	PTPN20	protein_coding
ENSG00000063587	hsa-miR-15a-5p	ENSG00000063587|ENST00000370251	163	-18.28	2	18	3917	3937	16	0.875	0.875	ENSG00000063587|ENST00000370251	hsa-miR-15a-5p	0	16	22	16	22	16297	7mer-m8	x	7mer-m8	0		0	ZNF275	protein_coding
ENSG00000063587	hsa-miR-15b-5p	ENSG00000063587|ENST00000370251	155	-16.15	2	18	3917	3937	16	0.8125	0.8125	ENSG00000063587|ENST00000370251	hsa-miR-15b-5p	0	16	22	16	22	16298	7mer-m8	x	7mer-m8	0		0	ZNF275	protein_coding
ENSG00000117479	hsa-miR-126-5p	ENSG00000117479|ENST00000367804	148	-6.06	2	17	1330	1350	15	0.6667	0.8	ENSG00000117479|ENST00000367804	hsa-miR-126-5p	0	47	53	47	53	16364	7mer-m8	x	7mer-m8	0		0	SLC19A2	protein_coding
ENSG00000184454	hsa-miR-30a-3p	ENSG00000184454|ENST00000374392	142	-11.99	2	11	3501	3522	9	0.8889	0.8889	ENSG00000184454|ENST00000374392	hsa-miR-30a-3p	0	20	25	20	25	16365	6mer	x	6mer	0		0	NCMAP	protein_coding
[truncated: 4,031 more rows]

## Sheet: L vs N
Table S3: Using miRanda and TargetScan softwares to predicte miRNA potential targets.
[truncated: 4,358 more rows]
