# Supplementary material for: Plasma-Derived Exosomal SncRNA as a Promising Diagnostic Biomarker for Early Detection of HBV-Related Acute-on-Chronic Liver Failure
Source: Front Cell Infect Microbiol. 2022 Jul 7;12:923300. doi: 10.3389/fcimb.2022.923300 (PMC9301338; doi:10.3389/fcimb.2022.923300)
Supplement: Supplementary file 5 [file Table_4.xlsx]

## Sheet: H vs N
Table S4：The differentially expressed tsRNAs were analyzed by sncRNA-seq.
Gene Name	L3	N1	L6	H1	N3	L5	H4	L1	L4	N2	H3	H2	L2	baseMean	log2FoldChange	lfcSE	stat	pvalue	padj	Length	Annotation (Parent RNA Category)	Gene Sequence
tsRNA-2	34.256	21.589	11.703	23.536	472.785	19.761	67.335	13.098	90.119	25.204	30.872	216.223	81.651	450.886	-1.99526	0.967245	-2.06283	0.039129	0.254675	37	mature-tRNA-Asp-GTC_3_end	CACGCGGGAGACCGGGGTTCGATTCCCCGACGGGGAG
tsRNA-17	123.247	227.716	69.634	168.677	227.287	59.825	80.659	283.79	131.291	95.813	69.391	324.076	353.578	889.685	-1.33157	0.659936	-2.01772	0.0436204	0.266295	29	mature-tRNA-Gly-GCC_5_end;mature-tRNA-Gly-CCC_5_end	GCATTGGTGGTTCAGTGGTAGAATTCTCG
tsRNA-18	137.769	697.336	71.39	162.575	367.761	54.953	285.519	202.291	362.079	282.436	136.233	183.117	431.568	1564.84	-1.96449	0.771899	-2.545	0.0109277	0.118084	30	mature-tRNA-Gly-GCC_5_end;mature-tRNA-Gly-CCC_5_end	GCATTGGTGGTTCAGTGGTAGAATTCTCGC
tsRNA-19	5.213	54.487	13.166	16.998	136.054	17.596	46.278	5.676	63.472	24.434	8.922	0.259	71.277	218.046	-2.3107	1.14702	-2.01453	0.0439535	0.266771	31	mature-tRNA-Gly-CCC_5_end;mature-tRNA-Gly-GCC_5_end	GCATTGGTGGTTCAGTGGTAGAATTCTCGCC
tsRNA-20	264.739	488.433	154.776	283.307	2530.39	259.333	409.482	681.824	614.139	430.003	303.339	539.522	874.12	3443.37	-2.29424	0.729213	-3.14618	0.00165415	0.0355542	32	mature-tRNA-Gly-GCC_5_end;mature-tRNA-Gly-CCC_5_end	GCATTGGTGGTTCAGTGGTAGAATTCTCGCCT
tsRNA-21	86.757	183.201	46.813	41.406	786.532	109.364	128.721	192.104	238.107	139.486	58.487	256.571	357.85	1139.32	-2.46371	0.779785	-3.15947	0.00158057	0.0350791	33	mature-tRNA-Gly-GCC_5_end;mature-tRNA-Gly-CCC_5_end	GCATTGGTGGTTCAGTGGTAGAATTCTCGCCTG
tsRNA-22	254.686	663.307	162.968	134.244	1589.07	351.913	467.537	619.535	557.528	652.989	348.797	1318.8	1028.39	3378.57	-1.72809	0.710156	-2.43339	0.0149582	0.144434	34	mature-tRNA-Gly-GCC_5_end;mature-tRNA-Gly-CCC_5_end	GCATTGGTGGTTCAGTGGTAGAATTCTCGCCTGC
tsRNA-23	7.075	13.673	4.389	21.793	116.87	4.061	15.585	24.013	11.436	10.774	10.763	42.676	67.005	143.94	-1.96309	0.938885	-2.09088	0.0365393	0.248784	32	mature-tRNA-Gly-GCC_5_end;mature-tRNA-Gly-CCC_5_end	GCATTTGTGGTTCAGTGGTAGAATTCTCGCCT
tsRNA-31	12.66	105.479	4.389	47.944	102.902	43.854	6.424	46.716	33.738	64.068	5.098	53.28	2.319	242.327	-2.93291	0.921114	-3.18409	0.00145208	0.0327159	18	mature-tRNA-Ser-AGA_5_end;mature-tRNA-Ser-TGA_5_end	GTAGTCGTGGCCGAGTGG
tsRNA-32	55.107	129.639	17.262	24.408	46.677	44.124	16.774	47.298	97.553	77.92	16.711	88.196	34.784	305.565	-2.45211	0.655097	-3.74312	0.000181748	0.0103946	18	mature-tRNA-Val-CAC_5_end;mature-tRNA-Val-AAC_5_end;mature-tRNA-Val-TAC_5_end	GTTTCCGTAGTGTAGTGG
tsRNA-34	16.011	93.143	21.066	23.1	11.404	5.414	31.764	12.079	29.049	38.094	11.188	4.656	24.776	157.984	-2.08931	0.881515	-2.37013	0.0177817	0.159001	33	mature-tRNA-Val-CAC_5_end;mature-tRNA-Val-AAC_5_end	GTTTCCGTAGTGTAGTGGTTATCACGTTCGCCT
tsRNA-38	22.713	22.309	7.9	8.281	231.177	34.921	35.214	53.702	45.975	29.052	31.438	116.129	54.19	285.944	-1.90486	0.858133	-2.21978	0.026434	0.204726	33	mature-tRNA-Glu-TTC_5_end	TCCCACATGGTCTAGCGGTTAGGATTCCTGGTT
tsRNA-40	0.745	0.822	0.293	0.872	4.862	2.436	0.714	1.455	2.402	1.154	0.85	3.88	1.831	8.89133	-1.5757	0.770972	-2.04379	0.0409746	0.257085	33	mature-tRNA-Glu-CTC_5_end	TCCCTGGCGGTCTAGTGGTTAGGATTCGGCGCT
tsRNA-41	2.606	2.467	1.463	1.308	11.139	2.166	1.19	2.329	3.202	0.577	1.558	5.431	5.004	16.7048	-2.02052	0.782324	-2.58271	0.00980278	0.111485	33	mature-tRNA-Glu-CTC_5_end	TCCCTGGTGGCCTAGTGGTTAGGATTCGGCGCT
tsRNA-45	37.235	193.379	8.485	30.51	83.896	5.685	39.14	55.739	52.265	57.719	42.06	91.041	48.942	344.717	-2.17451	0.776304	-2.80111	0.00509272	0.075702	30	mature-tRNA-Glu-CTC_5_end;mature-tRNA-Glu-TTC_5_end	TCCCTGGTGGTCTAGTGGTTAGGATTCGGC
tsRNA-46	63.671	532.743	34.525	53.175	297.922	29.777	269.102	180.461	277.906	199.321	67.409	374.51	139.259	1140.85	-1.76433	0.857429	-2.0577	0.0396194	0.254675	31	mature-tRNA-Glu-CTC_5_end;mature-tRNA-Glu-TTC_5_end	TCCCTGGTGGTCTAGTGGTTAGGATTCGGCG
tsRNA-48	933.848	991.157	267.127	449.804	5297.18	647.52	858.936	1833.28	2112.66	631.825	1343.64	2826.93	2127.69	8369.35	-1.64537	0.78735	-2.08975	0.0366401	0.248784	33	mature-tRNA-Glu-CTC_5_end;mature-tRNA-Glu-TTC_5_end	TCCCTGGTGGTCTAGTGGTTAGGATTCGGCGCT

## Sheet: L vs N
Table S4：The differentially expressed tsRNAs were analyzed by sncRNA-seq.
Gene Name	L3	N1	L6	H1	N3	L5	H4	L1	L4	N2	H3	H2	L2	baseMean	log2FoldChange	lfcSE	stat	pvalue	padj	Length	Annotation (Parent RNA Category)	Gene Sequence
tsRNA-2	34.256	21.589	11.703	23.536	472.785	19.761	67.335	13.098	90.119	25.204	30.872	216.223	81.651	450.886	-2.42237	0.895811	-2.70411	0.0068488	0.0883159	37	mature-tRNA-Asp-GTC_3_end	CACGCGGGAGACCGGGGTTCGATTCCCCGACGGGGAG
tsRNA-8	8.936	14.496	7.315	10.896	64.005	5.143	12.372	6.695	6.748	8.85	28.465	119.233	30.634	111.796	-1.8564	0.757629	-2.45027	0.0142748	0.131013	38	mature-tRNA-Asp-GTC_CCA_end	CGCGGGAGACCGGGGTTCGATTCCCCGACGGGGAGCCA
tsRNA-18	137.769	697.336	71.39	162.575	367.761	54.953	285.519	202.291	362.079	282.436	136.233	183.117	431.568	1564.84	-1.67647	0.714602	-2.34602	0.018975	0.148504	30	mature-tRNA-Gly-GCC_5_end;mature-tRNA-Gly-CCC_5_end	GCATTGGTGGTTCAGTGGTAGAATTCTCGC
tsRNA-20	264.739	488.433	154.776	283.307	2530.39	259.333	409.482	681.824	614.139	430.003	303.339	539.522	874.12	3443.37	-1.66038	0.675064	-2.4596	0.0139094	0.129711	32	mature-tRNA-Gly-GCC_5_end;mature-tRNA-Gly-CCC_5_end	GCATTGGTGGTTCAGTGGTAGAATTCTCGCCT
tsRNA-21	86.757	183.201	46.813	41.406	786.532	109.364	128.721	192.104	238.107	139.486	58.487	256.571	357.85	1139.32	-1.51032	0.721676	-2.0928	0.0363672	0.221631	33	mature-tRNA-Gly-GCC_5_end;mature-tRNA-Gly-CCC_5_end	GCATTGGTGGTTCAGTGGTAGAATTCTCGCCTG
tsRNA-22	254.686	663.307	162.968	134.244	1589.07	351.913	467.537	619.535	557.528	652.989	348.797	1318.8	1028.39	3378.57	-1.38902	0.657457	-2.11272	0.0346245	0.215426	34	mature-tRNA-Gly-GCC_5_end;mature-tRNA-Gly-CCC_5_end	GCATTGGTGGTTCAGTGGTAGAATTCTCGCCTGC
tsRNA-31	12.66	105.479	4.389	47.944	102.902	43.854	6.424	46.716	33.738	64.068	5.098	53.28	2.319	242.327	-2.33117	0.851962	-2.73624	0.00621454	0.0825091	18	mature-tRNA-Ser-AGA_5_end;mature-tRNA-Ser-TGA_5_end	GTAGTCGTGGCCGAGTGG
tsRNA-32	55.107	129.639	17.262	24.408	46.677	44.124	16.774	47.298	97.553	77.92	16.711	88.196	34.784	305.565	-1.30515	0.605094	-2.15694	0.0310103	0.202895	18	mature-tRNA-Val-CAC_5_end;mature-tRNA-Val-AAC_5_end;mature-tRNA-Val-TAC_5_end	GTTTCCGTAGTGTAGTGG
tsRNA-34	16.011	93.143	21.066	23.1	11.404	5.414	31.764	12.079	29.049	38.094	11.188	4.656	24.776	157.984	-2.0191	0.816149	-2.47393	0.0133635	0.129711	33	mature-tRNA-Val-CAC_5_end;mature-tRNA-Val-AAC_5_end	GTTTCCGTAGTGTAGTGGTTATCACGTTCGCCT
tsRNA-36	23.086	25.702	36.28	33.561	61.795	39.252	40.686	15.863	17.383	37.325	20.251	75.264	10.984	175.28	-1.17187	0.567711	-2.0642	0.0389992	0.228583	23	mature-tRNA-Glu-TTC_5_end	TCCCACATGGTCTAGCGGTTAGG
tsRNA-38	22.713	22.309	7.9	8.281	231.177	34.921	35.214	53.702	45.975	29.052	31.438	116.129	54.19	285.944	-1.69925	0.794374	-2.13911	0.0324268	0.209338	33	mature-tRNA-Glu-TTC_5_end	TCCCACATGGTCTAGCGGTTAGGATTCCTGGTT
tsRNA-39	5.585	25.907	0.585	3.487	21.836	8.933	33.073	9.314	18.298	18.47	15.011	163.719	0.854	106.239	-2.03754	0.941606	-2.1639	0.0304717	0.202895	34	mature-tRNA-Glu-TTC_5_end	TCCCACATGGTCTAGCGGTTAGGATTCCTGGTTT
tsRNA-42	1.117	0.925	2.048	1.743	7.868	1.083	1.19	1.746	0.915	0.577	0.708	5.69	1.098	10.4229	-1.61485	0.748739	-2.15676	0.0310244	0.202895	33	mature-tRNA-Glu-CTC_5_end	TCCCTGGTGGTCTAGCGGTTAGGATTCGGCGCT
tsRNA-45	37.235	193.379	8.485	30.51	83.896	5.685	39.14	55.739	52.265	57.719	42.06	91.041	48.942	344.717	-2.2733	0.718897	-3.16221	0.00156577	0.0362805	30	mature-tRNA-Glu-CTC_5_end;mature-tRNA-Glu-TTC_5_end	TCCCTGGTGGTCTAGTGGTTAGGATTCGGC
tsRNA-46	63.671	532.743	34.525	53.175	297.922	29.777	269.102	180.461	277.906	199.321	67.409	374.51	139.259	1140.85	-2.05099	0.79392	-2.58337	0.00978406	0.10942	31	mature-tRNA-Glu-CTC_5_end;mature-tRNA-Glu-TTC_5_end	TCCCTGGTGGTCTAGTGGTTAGGATTCGGCG
tsRNA-47	160.11	531.715	63.198	83.249	1350.29	75.526	628.618	354.519	484.907	207.787	200.668	568.231	216.516	2203.37	-2.05183	0.812435	-2.52553	0.0115524	0.121833	32	mature-tRNA-Glu-CTC_5_end;mature-tRNA-Glu-TTC_5_end	TCCCTGGTGGTCTAGTGGTTAGGATTCGGCGC
