# Supplementary material for: Plasma-Derived Exosomal SncRNA as a Promising Diagnostic Biomarker for Early Detection of HBV-Related Acute-on-Chronic Liver Failure
Source: Front Cell Infect Microbiol. 2022 Jul 7;12:923300. doi: 10.3389/fcimb.2022.923300 (PMC9301338; doi:10.3389/fcimb.2022.923300)
Supplement: Supplementary file 6 [file Table_5.xlsx]

## Sheet: H vs N
Table S5: Using miRanda and TargetScan softwares to predicte tsRNA potential targets.
ensemble_id	tsRNA	Target	Score	Energy_KcalMol	Query_Start	Query_End	Subject_Start	Subject_End	Aln_len	Subject_Identity	Query_Identity	a_Gene_ID	tsRNA_family_ID	species_ID	MSA_start	MSA_end	UTR_start	UTR_end	Group_num	Site_type	miRNA in this species	Group_type	Species_in_this_group	Species_in_this_group_with_this_site_type	ORF_overlap	gene_name	gene_type
ENSG00000006625	mature-tRNA-Gly-GCC_5_end_5	ENSG00000006625|ENST00000005374	145	-18.07	2	30	283	312	28	0.5	0.7143	ENSG00000006625|ENST00000005374	mature-tRNA-Gly-GCC_5_end_5	0	41	47	41	47	1	7mer-1a	x	7mer-1a	0		0	GGCT	protein_coding
ENSG00000013588	mature-tRNA-Glu-CTC_5_end_1	ENSG00000013588|ENST00000014914	156	-30.03	2	30	4383	4412	28	0.5714	0.75	ENSG00000013588|ENST00000014914	mature-tRNA-Glu-CTC_5_end_1	0	45	50	45	50	17	6mer	x	6mer	0		0	GPRC5A	protein_coding
ENSG00000070718	mature-tRNA-Glu-CTC_5_end_1	ENSG00000070718|ENST00000174653	184	-35.54	2	31	918	952	31	0.7097	0.7742	ENSG00000070718|ENST00000174653	mature-tRNA-Glu-CTC_5_end_1	0	33	38	33	38	26	6mer	x	6mer	0		0	AP3M2	protein_coding
ENSG00000070718	mature-tRNA-Glu-CTC_5_end_2	ENSG00000070718|ENST00000174653	159	-31.84	2	29	146	177	29	0.5862	0.6897	ENSG00000070718|ENST00000174653	mature-tRNA-Glu-CTC_5_end_2	0	33	38	33	38	27	6mer	x	6mer	0		0	AP3M2	protein_coding
ENSG00000070718	mature-tRNA-Glu-CTC_5_end_3	ENSG00000070718|ENST00000174653	159	-31.84	2	29	145	177	29	0.5862	0.6897	ENSG00000070718|ENST00000174653	mature-tRNA-Glu-CTC_5_end_3	0	33	38	33	38	28	6mer	x	6mer	0		0	AP3M2	protein_coding
ENSG00000070718	mature-tRNA-Glu-CTC_5_end_4	ENSG00000070718|ENST00000174653	159	-33.42	2	29	143	177	29	0.5862	0.6897	ENSG00000070718|ENST00000174653	mature-tRNA-Glu-CTC_5_end_4	0	33	38	33	38	29	6mer	x	6mer	0		0	AP3M2	protein_coding
ENSG00000075975	mature-tRNA-Glu-CTC_5_end_1	ENSG00000075975|ENST00000170447	158	-32.54	2	31	34	60	29	0.6552	0.6897	ENSG00000075975|ENST00000170447	mature-tRNA-Glu-CTC_5_end_1	0	17	22	17	22	30	6mer	x	6mer	0		0	MKRN2	protein_coding
ENSG00000072786	mature-tRNA-Gly-GCC_5_end_5	ENSG00000072786|ENST00000176763	162	-20.93	2	31	2127	2158	29	0.5172	0.7241	ENSG00000072786|ENST00000176763	mature-tRNA-Gly-GCC_5_end_5	0	28	33	28	33	44	6mer	x	6mer	0		0	STK10	protein_coding
ENSG00000089195	mature-tRNA-Gly-GCC_5_end_5	ENSG00000089195|ENST00000203001	163	-17.77	2	31	663	694	30	0.6	0.7333	ENSG00000089195|ENST00000203001	mature-tRNA-Gly-GCC_5_end_5	0	29	34	29	34	50	6mer	x	6mer	0		0	TRMT6	protein_coding
ENSG00000100422	mature-tRNA-Gly-CCC_5_end_1	ENSG00000100422|ENST00000216264	156	-20.97	2	26	733	762	25	0.6	0.72	ENSG00000100422|ENST00000216264	mature-tRNA-Gly-CCC_5_end_1	0	41	47	41	47	58	7mer-1a	x	7mer-1a	0		0	CERK	protein_coding
ENSG00000100422	mature-tRNA-Gly-GCC_5_end_1	ENSG00000100422|ENST00000216264	156	-26.66	2	29	1516	1550	33	0.6061	0.697	ENSG00000100422|ENST00000216264	mature-tRNA-Gly-GCC_5_end_1	0	41	47	41	47	59	7mer-1a	x	7mer-1a	0		0	CERK	protein_coding
ENSG00000100422	mature-tRNA-Gly-GCC_5_end_2	ENSG00000100422|ENST00000216264	156	-26.66	2	29	1514	1550	33	0.6061	0.697	ENSG00000100422|ENST00000216264	mature-tRNA-Gly-GCC_5_end_2	0	41	47	41	47	60	7mer-1a	x	7mer-1a	0		0	CERK	protein_coding
ENSG00000100422	mature-tRNA-Gly-GCC_5_end_3	ENSG00000100422|ENST00000216264	157	-27.08	2	32	723	762	37	0.5676	0.6486	ENSG00000100422|ENST00000216264	mature-tRNA-Gly-GCC_5_end_3	0	41	47	41	47	61	7mer-1a	x	7mer-1a	0		0	CERK	protein_coding
ENSG00000100422	mature-tRNA-Gly-GCC_5_end_4	ENSG00000100422|ENST00000216264	157	-29.11	2	32	722	762	37	0.5676	0.6486	ENSG00000100422|ENST00000216264	mature-tRNA-Gly-GCC_5_end_4	0	41	47	41	47	62	7mer-1a	x	7mer-1a	0		0	CERK	protein_coding
ENSG00000100678	mature-tRNA-Glu-TTC_5_end_1	ENSG00000100678|ENST00000216568	151	-24.79	2	32	1412	1443	31	0.5806	0.6452	ENSG00000100678|ENST00000216568	mature-tRNA-Glu-TTC_5_end_1	0	37	43	37	43	95	7mer-m8	x	7mer-m8	0		0	SLC8A3	protein_coding
ENSG00000229809	mature-tRNA-Glu-CTC_5_end_1	ENSG00000229809|ENST00000223459	154	-28.81	2	30	337	370	30	0.5333	0.7333	ENSG00000229809|ENST00000223459	mature-tRNA-Glu-CTC_5_end_1	0	28	33	28	33	111	6mer	x	6mer	0		0	ZNF688	protein_coding
ENSG00000229809	mature-tRNA-Glu-CTC_5_end_2	ENSG00000229809|ENST00000223459	149	-23.45	2	29	340	370	29	0.5172	0.7241	ENSG00000229809|ENST00000223459	mature-tRNA-Glu-CTC_5_end_2	0	28	33	28	33	112	6mer	x	6mer	0		0	ZNF688	protein_coding
ENSG00000229809	mature-tRNA-Glu-CTC_5_end_3	ENSG00000229809|ENST00000223459	150	-25.86	2	30	339	370	30	0.5	0.7333	ENSG00000229809|ENST00000223459	mature-tRNA-Glu-CTC_5_end_3	0	28	33	28	33	113	6mer	x	6mer	0		0	ZNF688	protein_coding
ENSG00000229809	mature-tRNA-Glu-CTC_5_end_4	ENSG00000229809|ENST00000223459	150	-26.1	2	30	337	370	30	0.5	0.7333	ENSG00000229809|ENST00000223459	mature-tRNA-Glu-CTC_5_end_4	0	28	33	28	33	114	6mer	x	6mer	0		0	ZNF688	protein_coding
ENSG00000106069	mature-tRNA-Gly-GCC_5_end_5	ENSG00000106069|ENST00000222792	162	-27.25	2	17	522	552	15	0.8667	0.9333	ENSG00000106069|ENST00000222792	mature-tRNA-Gly-GCC_5_end_5	0	44	51	44	51	157	8mer-1a	x	8mer-1a	0		0	CHN2	protein_coding
ENSG00000101986	mature-tRNA-Glu-CTC_5_end_1	ENSG00000101986|ENST00000218104	172	-34.45	2	31	851	882	29	0.6207	0.7586	ENSG00000101986|ENST00000218104	mature-tRNA-Glu-CTC_5_end_1	0	53	58	53	58	175	6mer	x	6mer	0		0	ABCD1	protein_coding
ENSG00000101986	mature-tRNA-Glu-CTC_5_end_2	ENSG00000101986|ENST00000218104	160	-29.64	2	27	854	882	25	0.6	0.76	ENSG00000101986|ENST00000218104	mature-tRNA-Glu-CTC_5_end_2	0	53	58	53	58	176	6mer	x	6mer	0		0	ABCD1	protein_coding
ENSG00000101986	mature-tRNA-Glu-CTC_5_end_3	ENSG00000101986|ENST00000218104	163	-30.56	2	30	853	882	28	0.5714	0.75	ENSG00000101986|ENST00000218104	mature-tRNA-Glu-CTC_5_end_3	0	53	58	53	58	177	6mer	x	6mer	0		0	ABCD1	protein_coding
ENSG00000101986	mature-tRNA-Glu-CTC_5_end_4	ENSG00000101986|ENST00000218104	168	-31.68	2	31	851	882	29	0.5862	0.7586	ENSG00000101986|ENST00000218104	mature-tRNA-Glu-CTC_5_end_4	0	53	58	53	58	178	6mer	x	6mer	0		0	ABCD1	protein_coding
ENSG00000132434	mature-tRNA-Gly-GCC_5_end_5	ENSG00000132434|ENST00000254770	175	-25.87	2	31	356	385	29	0.6207	0.7931	ENSG00000132434|ENST00000254770	mature-tRNA-Gly-GCC_5_end_5	0	33	39	33	39	182	7mer-m8	x	7mer-m8	0		0	LANCL2	protein_coding
ENSG00000131149	mature-tRNA-Glu-CTC_5_end_1	ENSG00000131149|ENST00000253458	157	-30.85	2	32	1545	1576	30	0.6	0.6333	ENSG00000131149|ENST00000253458	mature-tRNA-Glu-CTC_5_end_1	0	27	32	27	32	187	6mer	x	6mer	0		0	GSE1	protein_coding
ENSG00000106336	mature-tRNA-Glu-CTC_5_end_1	ENSG00000106336|ENST00000241071	155	-30.95	2	28	28	55	26	0.6538	0.7692	ENSG00000106336|ENST00000241071	mature-tRNA-Glu-CTC_5_end_1	0	35	40	35	40	220	6mer	x	6mer	0		0	FBXO24	protein_coding
ENSG00000106336	mature-tRNA-Glu-CTC_5_end_2	ENSG00000106336|ENST00000241071	146	-22.34	2	28	103	128	26	0.5385	0.6923	ENSG00000106336|ENST00000241071	mature-tRNA-Glu-CTC_5_end_2	0	35	40	35	40	221	6mer	x	6mer	0		0	FBXO24	protein_coding
ENSG00000106336	mature-tRNA-Glu-CTC_5_end_3	ENSG00000106336|ENST00000241071	146	-22.47	2	28	102	128	26	0.5385	0.6923	ENSG00000106336|ENST00000241071	mature-tRNA-Glu-CTC_5_end_3	0	35	40	35	40	222	6mer	x	6mer	0		0	FBXO24	protein_coding
ENSG00000106336	mature-tRNA-Glu-CTC_5_end_4	ENSG00000106336|ENST00000241071	146	-24.59	2	28	100	128	26	0.5385	0.6923	ENSG00000106336|ENST00000241071	mature-tRNA-Glu-CTC_5_end_4	0	35	40	35	40	223	6mer	x	6mer	0		0	FBXO24	protein_coding
ENSG00000130700	mature-tRNA-Glu-CTC_5_end_1	ENSG00000130700|ENST00000252997	170	-33.82	2	30	538	568	28	0.6071	0.7857	ENSG00000130700|ENST00000252997	mature-tRNA-Glu-CTC_5_end_1	0	30	35	30	35	253	6mer	x	6mer	0		0	GATA5	protein_coding
ENSG00000101442	mature-tRNA-Gly-GCC_5_end_5	ENSG00000101442|ENST00000243903	147	-17.06	2	27	272	303	26	0.5769	0.6923	ENSG00000101442|ENST00000243903	mature-tRNA-Gly-GCC_5_end_5	0	54	59	54	59	268	6mer	x	6mer	0		0	ACTR5	protein_coding
ENSG00000091157	mature-tRNA-Glu-TTC_5_end_1	ENSG00000091157|ENST00000254442	158	-25.64	2	32	1064	1093	30	0.5667	0.7333	ENSG00000091157|ENST00000254442	mature-tRNA-Glu-TTC_5_end_1	0	42	47	42	47	332	6mer	x	6mer	0		0	WDR7	protein_coding
ENSG00000088854	mature-tRNA-Gly-GCC_5_end_5	ENSG00000088854|ENST00000252032	154	-23.38	2	27	580	611	25	0.52	0.72	ENSG00000088854|ENST00000252032	mature-tRNA-Gly-GCC_5_end_5	0	41	47	41	47	339	7mer-1a	x	7mer-1a	0		0	C20orf194	protein_coding
ENSG00000131089	mature-tRNA-Gly-CCC_5_end_1	ENSG00000131089|ENST00000253401	149	-18.3	2	14	230	258	12	0.75	0.9167	ENSG00000131089|ENST00000253401	mature-tRNA-Gly-CCC_5_end_1	0	44	49	44	49	350	6mer	x	6mer	0		0	ARHGEF9	protein_coding
ENSG00000131089	mature-tRNA-Gly-GCC_5_end_1	ENSG00000131089|ENST00000253401	151	-19.76	2	30	229	258	28	0.5357	0.6786	ENSG00000131089|ENST00000253401	mature-tRNA-Gly-GCC_5_end_1	0	44	49	44	49	351	6mer	x	6mer	0		0	ARHGEF9	protein_coding
ENSG00000131089	mature-tRNA-Gly-GCC_5_end_2	ENSG00000131089|ENST00000253401	151	-19.88	2	30	228	258	28	0.5357	0.6786	ENSG00000131089|ENST00000253401	mature-tRNA-Gly-GCC_5_end_2	0	44	49	44	49	352	6mer	x	6mer	0		0	ARHGEF9	protein_coding
ENSG00000131089	mature-tRNA-Gly-GCC_5_end_3	ENSG00000131089|ENST00000253401	151	-21.49	2	30	227	258	28	0.5357	0.6786	ENSG00000131089|ENST00000253401	mature-tRNA-Gly-GCC_5_end_3	0	44	49	44	49	353	6mer	x	6mer	0		0	ARHGEF9	protein_coding
ENSG00000131089	mature-tRNA-Gly-GCC_5_end_4	ENSG00000131089|ENST00000253401	151	-24.05	2	30	226	258	28	0.5357	0.6786	ENSG00000131089|ENST00000253401	mature-tRNA-Gly-GCC_5_end_4	0	44	49	44	49	354	6mer	x	6mer	0		0	ARHGEF9	protein_coding
ENSG00000082196	mature-tRNA-Gly-GCC_5_end_5	ENSG00000082196|ENST00000231338	155	-21.73	2	30	667	692	28	0.6429	0.7857	ENSG00000082196|ENST00000231338	mature-tRNA-Gly-GCC_5_end_5	0	24	30	24	30	371	7mer-1a	x	7mer-1a	0		0	C1QTNF3	protein_coding
ENSG00000205045	mature-tRNA-Glu-CTC_5_end_1	ENSG00000205045|ENST00000260908	159	-31.19	2	26	1032	1067	27	0.6667	0.7037	ENSG00000205045|ENST00000260908	mature-tRNA-Glu-CTC_5_end_1	0	26	31	26	31	395	6mer	x	6mer	0		0	SLFN12L	protein_coding
ENSG00000038532	mature-tRNA-Glu-CTC_5_end_1	ENSG00000038532|ENST00000261657	176	-40.07	2	31	1686	1721	32	0.6875	0.7188	ENSG00000038532|ENST00000261657	mature-tRNA-Glu-CTC_5_end_1	0	39	45	39	45	421	7mer-1a	x	7mer-1a	0		0	CLEC16A	protein_coding
ENSG00000038532	mature-tRNA-Glu-CTC_5_end_2	ENSG00000038532|ENST00000261657	170	-30.58	2	26	1694	1721	24	0.75	0.75	ENSG00000038532|ENST00000261657	mature-tRNA-Glu-CTC_5_end_2	0	39	45	39	45	422	7mer-1a	x	7mer-1a	0		0	CLEC16A	protein_coding
ENSG00000038532	mature-tRNA-Glu-CTC_5_end_3	ENSG00000038532|ENST00000261657	171	-39.22	2	30	1688	1721	31	0.6774	0.7097	ENSG00000038532|ENST00000261657	mature-tRNA-Glu-CTC_5_end_3	0	39	45	39	45	423	7mer-1a	x	7mer-1a	0		0	CLEC16A	protein_coding
ENSG00000038532	mature-tRNA-Glu-CTC_5_end_4	ENSG00000038532|ENST00000261657	176	-40.07	2	31	1686	1721	32	0.6875	0.7188	ENSG00000038532|ENST00000261657	mature-tRNA-Glu-CTC_5_end_4	0	39	45	39	45	424	7mer-1a	x	7mer-1a	0		0	CLEC16A	protein_coding
ENSG00000136040	mature-tRNA-Gly-GCC_5_end_5	ENSG00000136040|ENST00000258526	162	-16.33	2	22	2132	2161	20	0.75	0.8	ENSG00000136040|ENST00000258526	mature-tRNA-Gly-GCC_5_end_5	0	43	49	43	49	435	7mer-1a	x	7mer-1a	0		0	PLXNC1	protein_coding
ENSG00000091622	mature-tRNA-Glu-CTC_5_end_1	ENSG00000091622|ENST00000262483	163	-26.77	2	28	2411	2442	27	0.6296	0.7778	ENSG00000091622|ENST00000262483	mature-tRNA-Glu-CTC_5_end_1	0	44	49	44	49	439	6mer	x	6mer	0		0	PITPNM3	protein_coding
ENSG00000091622	mature-tRNA-Glu-CTC_5_end_2	ENSG00000091622|ENST00000262483	159	-23.53	2	28	2414	2442	27	0.5926	0.7778	ENSG00000091622|ENST00000262483	mature-tRNA-Glu-CTC_5_end_2	0	44	49	44	49	440	6mer	x	6mer	0		0	PITPNM3	protein_coding
ENSG00000091622	mature-tRNA-Glu-CTC_5_end_3	ENSG00000091622|ENST00000262483	159	-23.74	2	28	2413	2442	27	0.5926	0.7778	ENSG00000091622|ENST00000262483	mature-tRNA-Glu-CTC_5_end_3	0	44	49	44	49	441	6mer	x	6mer	0		0	PITPNM3	protein_coding
ENSG00000091622	mature-tRNA-Glu-CTC_5_end_4	ENSG00000091622|ENST00000262483	159	-24.13	2	28	2411	2442	27	0.5926	0.7778	ENSG00000091622|ENST00000262483	mature-tRNA-Glu-CTC_5_end_4	0	44	49	44	49	442	6mer	x	6mer	0		0	PITPNM3	protein_coding
ENSG00000134001	mature-tRNA-Glu-CTC_5_end_1	ENSG00000134001|ENST00000256383	168	-31.2	2	31	311	342	31	0.6452	0.7742	ENSG00000134001|ENST00000256383	mature-tRNA-Glu-CTC_5_end_1	0	48	54	48	54	497	7mer-1a	x	7mer-1a	0		0	EIF2S1	protein_coding
ENSG00000134760	mature-tRNA-Glu-TTC_5_end_1	ENSG00000134760|ENST00000257192	179	-35.23	2	32	639	674	34	0.6765	0.7647	ENSG00000134760|ENST00000257192	mature-tRNA-Glu-TTC_5_end_1	0	30	36	30	36	522	7mer-m8	x	7mer-m8	0		0	DSG1	protein_coding
ENSG00000110880	mature-tRNA-Gly-CCC_5_end_1	ENSG00000110880|ENST00000261401	158	-17.39	2	24	349	380	25	0.6	0.76	ENSG00000110880|ENST00000261401	mature-tRNA-Gly-CCC_5_end_1	0	32	37	32	37	558	6mer	x	6mer	0		0	CORO1C	protein_coding
ENSG00000110880	mature-tRNA-Gly-GCC_5_end_1	ENSG00000110880|ENST00000261401	158	-21.11	2	24	347	380	25	0.6	0.76	ENSG00000110880|ENST00000261401	mature-tRNA-Gly-GCC_5_end_1	0	32	37	32	37	559	6mer	x	6mer	0		0	CORO1C	protein_coding
ENSG00000110880	mature-tRNA-Gly-GCC_5_end_2	ENSG00000110880|ENST00000261401	158	-21.13	2	24	346	380	25	0.6	0.76	ENSG00000110880|ENST00000261401	mature-tRNA-Gly-GCC_5_end_2	0	32	37	32	37	560	6mer	x	6mer	0		0	CORO1C	protein_coding
ENSG00000110880	mature-tRNA-Gly-GCC_5_end_3	ENSG00000110880|ENST00000261401	158	-22.31	2	24	345	380	25	0.6	0.76	ENSG00000110880|ENST00000261401	mature-tRNA-Gly-GCC_5_end_3	0	32	37	32	37	561	6mer	x	6mer	0		0	CORO1C	protein_coding
ENSG00000110880	mature-tRNA-Gly-GCC_5_end_4	ENSG00000110880|ENST00000261401	158	-22.58	2	24	344	380	25	0.6	0.76	ENSG00000110880|ENST00000261401	mature-tRNA-Gly-GCC_5_end_4	0	32	37	32	37	562	6mer	x	6mer	0		0	CORO1C	protein_coding
ENSG00000136213	mature-tRNA-Glu-CTC_5_end_1	ENSG00000136213|ENST00000258711	166	-34.33	2	24	10626	10659	23	0.6522	0.8261	ENSG00000136213|ENST00000258711	mature-tRNA-Glu-CTC_5_end_1	0	41	46	41	46	567	6mer	x	6mer	0		0	CHST12	protein_coding
ENSG00000136213	mature-tRNA-Glu-CTC_5_end_2	ENSG00000136213|ENST00000258711	166	-32.71	2	24	10629	10659	23	0.6522	0.8261	ENSG00000136213|ENST00000258711	mature-tRNA-Glu-CTC_5_end_2	0	41	46	41	46	568	6mer	x	6mer	0		0	CHST12	protein_coding
ENSG00000136213	mature-tRNA-Glu-CTC_5_end_3	ENSG00000136213|ENST00000258711	166	-32.88	2	24	10628	10659	23	0.6522	0.8261	ENSG00000136213|ENST00000258711	mature-tRNA-Glu-CTC_5_end_3	0	41	46	41	46	569	6mer	x	6mer	0		0	CHST12	protein_coding
ENSG00000136213	mature-tRNA-Glu-CTC_5_end_4	ENSG00000136213|ENST00000258711	166	-32.88	2	24	10626	10659	23	0.6522	0.8261	ENSG00000136213|ENST00000258711	mature-tRNA-Glu-CTC_5_end_4	0	41	46	41	46	570	6mer	x	6mer	0		0	CHST12	protein_coding
ENSG00000065717	mature-tRNA-Glu-TTC_5_end_1	ENSG00000065717|ENST00000262953	157	-29.02	2	24	127	158	22	0.6818	0.7273	ENSG00000065717|ENST00000262953	mature-tRNA-Glu-TTC_5_end_1	0	51	56	51	56	571	6mer	x	6mer	0		0	TLE2	protein_coding
ENSG00000136848	mature-tRNA-Glu-CTC_5_end_1	ENSG00000136848|ENST00000259371	176	-44.72	2	21	605	637	19	0.7895	0.8947	ENSG00000136848|ENST00000259371	mature-tRNA-Glu-CTC_5_end_1	0	50	56	50	56	572	7mer-1a	x	7mer-1a	0		0	DAB2IP	protein_coding
ENSG00000136848	mature-tRNA-Glu-CTC_5_end_2	ENSG00000136848|ENST00000259371	172	-37.9	2	21	608	637	19	0.7368	0.8947	ENSG00000136848|ENST00000259371	mature-tRNA-Glu-CTC_5_end_2	0	50	56	50	56	573	7mer-1a	x	7mer-1a	0		0	DAB2IP	protein_coding
ENSG00000136848	mature-tRNA-Glu-CTC_5_end_3	ENSG00000136848|ENST00000259371	172	-39.5	2	21	607	637	19	0.7368	0.8947	ENSG00000136848|ENST00000259371	mature-tRNA-Glu-CTC_5_end_3	0	50	56	50	56	574	7mer-1a	x	7mer-1a	0		0	DAB2IP	protein_coding
ENSG00000136848	mature-tRNA-Glu-CTC_5_end_4	ENSG00000136848|ENST00000259371	172	-42.43	2	21	605	637	19	0.7368	0.8947	ENSG00000136848|ENST00000259371	mature-tRNA-Glu-CTC_5_end_4	0	50	56	50	56	575	7mer-1a	x	7mer-1a	0		0	DAB2IP	protein_coding
ENSG00000161850	mature-tRNA-Glu-CTC_5_end_1	ENSG00000161850|ENST00000257974	165	-33.89	2	32	41	69	30	0.6333	0.7333	ENSG00000161850|ENST00000257974	mature-tRNA-Glu-CTC_5_end_1	0	44	49	44	49	595	6mer	x	6mer	0		0	KRT82	protein_coding
ENSG00000161850	mature-tRNA-Glu-CTC_5_end_2	ENSG00000161850|ENST00000257974	158	-31.45	2	29	44	69	27	0.6296	0.7407	ENSG00000161850|ENST00000257974	mature-tRNA-Glu-CTC_5_end_2	0	44	49	44	49	596	6mer	x	6mer	0		0	KRT82	protein_coding
ENSG00000161850	mature-tRNA-Glu-CTC_5_end_3	ENSG00000161850|ENST00000257974	163	-31.45	2	30	43	69	28	0.6429	0.75	ENSG00000161850|ENST00000257974	mature-tRNA-Glu-CTC_5_end_3	0	44	49	44	49	597	6mer	x	6mer	0		0	KRT82	protein_coding
ENSG00000161850	mature-tRNA-Glu-CTC_5_end_4	ENSG00000161850|ENST00000257974	165	-33.94	2	32	41	69	30	0.6333	0.7333	ENSG00000161850|ENST00000257974	mature-tRNA-Glu-CTC_5_end_4	0	44	49	44	49	598	6mer	x	6mer	0		0	KRT82	protein_coding
ENSG00000039139	mature-tRNA-Glu-TTC_5_end_1	ENSG00000039139|ENST00000265104	145	-20.33	2	10	1	9	8	1	1	ENSG00000039139|ENST00000265104	mature-tRNA-Glu-TTC_5_end_1	0	44	49	44	49	621	6mer	x	6mer	0		0	DNAH5	protein_coding
ENSG00000139197	mature-tRNA-Glu-CTC_5_end_1	ENSG00000139197|ENST00000266563	160	-32.15	2	32	617	649	31	0.5806	0.7097	ENSG00000139197|ENST00000266563	mature-tRNA-Glu-CTC_5_end_1	0	19	25	19	25	629	7mer-1a	x	7mer-1a	0		0	PEX5	protein_coding
ENSG00000116353	mature-tRNA-Gly-GCC_5_end_5	ENSG00000116353|ENST00000263702	163	-26.93	2	29	1241	1275	30	0.5667	0.7333	ENSG00000116353|ENST00000263702	mature-tRNA-Gly-GCC_5_end_5	0	23	29	23	29	638	7mer-1a	x	7mer-1a	0		0	MECR	protein_coding
ENSG00000101577	mature-tRNA-Glu-CTC_5_end_1	ENSG00000101577|ENST00000261596	164	-32.7	2	32	1193	1223	30	0.5667	0.7333	ENSG00000101577|ENST00000261596	mature-tRNA-Glu-CTC_5_end_1	0	25	32	25	32	643	8mer-1a	x	8mer-1a	0		0	LPIN2	protein_coding
ENSG00000101577	mature-tRNA-Glu-CTC_5_end_2	ENSG00000101577|ENST00000261596	161	-30.68	2	29	1196	1223	27	0.5926	0.7407	ENSG00000101577|ENST00000261596	mature-tRNA-Glu-CTC_5_end_2	0	25	32	25	32	644	8mer-1a	x	8mer-1a	0		0	LPIN2	protein_coding
ENSG00000101577	mature-tRNA-Glu-CTC_5_end_3	ENSG00000101577|ENST00000261596	162	-30.68	2	30	1195	1223	28	0.5714	0.75	ENSG00000101577|ENST00000261596	mature-tRNA-Glu-CTC_5_end_3	0	25	32	25	32	645	8mer-1a	x	8mer-1a	0		0	LPIN2	protein_coding
ENSG00000101577	mature-tRNA-Glu-CTC_5_end_4	ENSG00000101577|ENST00000261596	164	-31.8	2	32	1193	1223	30	0.5667	0.7333	ENSG00000101577|ENST00000261596	mature-tRNA-Glu-CTC_5_end_4	0	25	32	25	32	646	8mer-1a	x	8mer-1a	0		0	LPIN2	protein_coding
ENSG00000077044	mature-tRNA-Glu-CTC_5_end_1	ENSG00000077044|ENST00000264057	165	-34.85	2	28	899	930	26	0.6154	0.7692	ENSG00000077044|ENST00000264057	mature-tRNA-Glu-CTC_5_end_1	0	39	44	39	44	647	6mer	x	6mer	0		0	DGKD	protein_coding
ENSG00000165495	mature-tRNA-Glu-CTC_5_end_1	ENSG00000165495|ENST00000298282	171	-34.23	2	28	1051	1083	26	0.6154	0.7692	ENSG00000165495|ENST00000298282	mature-tRNA-Glu-CTC_5_end_1	0	54	59	54	59	683	6mer	x	6mer	0		0	PKNOX2	protein_coding
ENSG00000164087	mature-tRNA-Gly-GCC_5_end_5	ENSG00000164087|ENST00000296484	152	-20.86	2	17	191	222	15	0.7333	0.8	ENSG00000164087|ENST00000296484	mature-tRNA-Gly-GCC_5_end_5	0	27	33	27	33	691	7mer-m8	x	7mer-m8	0		0	POC1A	protein_coding
ENSG00000084453	mature-tRNA-Gly-GCC_5_end_5	ENSG00000084453|ENST00000307378	163	-18.73	2	28	4882	4910	26	0.6154	0.7692	ENSG00000084453|ENST00000307378	mature-tRNA-Gly-GCC_5_end_5	0	15	20	15	20	718	6mer	x	6mer	0		0	SLCO1A2	protein_coding
ENSG00000144036	mature-tRNA-Glu-CTC_5_end_1	ENSG00000144036|ENST00000272427	165	-35.14	2	31	1744	1780	33	0.5758	0.697	ENSG00000144036|ENST00000272427	mature-tRNA-Glu-CTC_5_end_1	0	39	44	39	44	734	6mer	x	6mer	0		0	EXOC6B	protein_coding
ENSG00000175220	mature-tRNA-Glu-CTC_5_end_1	ENSG00000175220|ENST00000311956	168	-33.44	2	27	1685	1721	29	0.6207	0.7931	ENSG00000175220|ENST00000311956	mature-tRNA-Glu-CTC_5_end_1	0	32	38	32	38	753	7mer-1a	x	7mer-1a	0		0	ARHGAP1	protein_coding
ENSG00000165392	mature-tRNA-Glu-CTC_5_end_1	ENSG00000165392|ENST00000298139	157	-29.52	2	18	464	496	16	0.6875	0.875	ENSG00000165392|ENST00000298139	mature-tRNA-Glu-CTC_5_end_1	0	39	45	39	45	760	7mer-1a	x	7mer-1a	0		0	WRN	protein_coding
ENSG00000165392	mature-tRNA-Glu-CTC_5_end_2	ENSG00000165392|ENST00000298139	157	-24.19	2	18	467	496	16	0.6875	0.875	ENSG00000165392|ENST00000298139	mature-tRNA-Glu-CTC_5_end_2	0	39	45	39	45	761	7mer-1a	x	7mer-1a	0		0	WRN	protein_coding
ENSG00000165392	mature-tRNA-Glu-CTC_5_end_3	ENSG00000165392|ENST00000298139	157	-29.25	2	18	466	496	16	0.6875	0.875	ENSG00000165392|ENST00000298139	mature-tRNA-Glu-CTC_5_end_3	0	39	45	39	45	762	7mer-1a	x	7mer-1a	0		0	WRN	protein_coding
ENSG00000165392	mature-tRNA-Glu-CTC_5_end_4	ENSG00000165392|ENST00000298139	157	-29.52	2	18	464	496	16	0.6875	0.875	ENSG00000165392|ENST00000298139	mature-tRNA-Glu-CTC_5_end_4	0	39	45	39	45	763	7mer-1a	x	7mer-1a	0		0	WRN	protein_coding
ENSG00000166068	mature-tRNA-Glu-CTC_5_end_1	ENSG00000166068|ENST00000299084	158	-30.22	2	22	2930	2960	20	0.7	0.8	ENSG00000166068|ENST00000299084	mature-tRNA-Glu-CTC_5_end_1	0	49	54	49	54	786	6mer	x	6mer	0		0	SPRED1	protein_coding
ENSG00000166068	mature-tRNA-Glu-CTC_5_end_2	ENSG00000166068|ENST00000299084	158	-30.55	2	22	2933	2960	20	0.7	0.8	ENSG00000166068|ENST00000299084	mature-tRNA-Glu-CTC_5_end_2	0	49	54	49	54	787	6mer	x	6mer	0		0	SPRED1	protein_coding
ENSG00000166068	mature-tRNA-Glu-CTC_5_end_3	ENSG00000166068|ENST00000299084	158	-30.69	2	22	2932	2960	20	0.7	0.8	ENSG00000166068|ENST00000299084	mature-tRNA-Glu-CTC_5_end_3	0	49	54	49	54	788	6mer	x	6mer	0		0	SPRED1	protein_coding
ENSG00000166068	mature-tRNA-Glu-CTC_5_end_4	ENSG00000166068|ENST00000299084	158	-30.93	2	22	2930	2960	20	0.7	0.8	ENSG00000166068|ENST00000299084	mature-tRNA-Glu-CTC_5_end_4	0	49	54	49	54	789	6mer	x	6mer	0		0	SPRED1	protein_coding
ENSG00000146830	mature-tRNA-Glu-CTC_5_end_1	ENSG00000146830|ENST00000275732	171	-42.86	2	30	2	39	33	0.6061	0.7576	ENSG00000146830|ENST00000275732	mature-tRNA-Glu-CTC_5_end_1	0	39	44	39	44	814	6mer	x	6mer	0		0	GIGYF1	protein_coding
ENSG00000183826	mature-tRNA-Glu-TTC_5_end_1	ENSG00000183826|ENST00000314100	153	-25.76	2	32	3480	3511	30	0.5	0.7	ENSG00000183826|ENST00000314100	mature-tRNA-Glu-TTC_5_end_1	0	32	37	32	37	850	6mer	x	6mer	0		0	BTBD9	protein_coding
ENSG00000186453	mature-tRNA-Glu-TTC_5_end_1	ENSG00000186453|ENST00000295150	161	-23.71	2	30	155	187	28	0.5714	0.6786	ENSG00000186453|ENST00000295150	mature-tRNA-Glu-TTC_5_end_1	0	34	39	34	39	855	6mer	x	6mer	0		0	FAM228A	protein_coding
ENSG00000168939	mature-tRNA-Glu-CTC_5_end_1	ENSG00000168939|ENST00000302805	160	-32.79	2	32	3746	3779	32	0.5625	0.7188	ENSG00000168939|ENST00000302805	mature-tRNA-Glu-CTC_5_end_1	0	36	41	36	41	860	6mer	x	6mer	0		0	SPRY3	protein_coding
ENSG00000147381	mature-tRNA-Glu-CTC_5_end_1	ENSG00000147381|ENST00000276344	148	-20.9	2	18	1	20	18	0.6667	0.7778	ENSG00000147381|ENST00000276344	mature-tRNA-Glu-CTC_5_end_1	0	38	43	38	43	922	6mer	x	6mer	0		0	MAGEA4	protein_coding
ENSG00000157600	mature-tRNA-Glu-TTC_5_end_1	ENSG00000157600|ENST00000288381	166	-29.31	2	32	2742	2771	30	0.6333	0.7333	ENSG00000157600|ENST00000288381	mature-tRNA-Glu-TTC_5_end_1	0	38	44	38	44	926	7mer-m8	x	7mer-m8	0		0	TMEM164	protein_coding
ENSG00000184154	mature-tRNA-Glu-CTC_5_end_1	ENSG00000184154|ENST00000289488	164	-27.66	2	30	1184	1213	28	0.6429	0.75	ENSG00000184154|ENST00000289488	mature-tRNA-Glu-CTC_5_end_1	0	46	51	46	51	959	6mer	x	6mer	0		0	LRTOMT	protein_coding
ENSG00000184154	mature-tRNA-Glu-CTC_5_end_2	ENSG00000184154|ENST00000289488	167	-31.27	2	25	1181	1213	26	0.6538	0.7692	ENSG00000184154|ENST00000289488	mature-tRNA-Glu-CTC_5_end_2	0	46	51	46	51	960	6mer	x	6mer	0		0	LRTOMT	protein_coding
ENSG00000184154	mature-tRNA-Glu-CTC_5_end_3	ENSG00000184154|ENST00000289488	172	-31.27	2	30	1186	1213	28	0.6786	0.7857	ENSG00000184154|ENST00000289488	mature-tRNA-Glu-CTC_5_end_3	0	46	51	46	51	961	6mer	x	6mer	0		0	LRTOMT	protein_coding
ENSG00000184154	mature-tRNA-Glu-CTC_5_end_4	ENSG00000184154|ENST00000289488	172	-31.27	2	30	1184	1213	28	0.6786	0.7857	ENSG00000184154|ENST00000289488	mature-tRNA-Glu-CTC_5_end_4	0	46	51	46	51	962	6mer	x	6mer	0		0	LRTOMT	protein_coding
ENSG00000163635	mature-tRNA-Gly-GCC_5_end_5	ENSG00000163635|ENST00000295900	151	-19.8	2	27	3854	3887	28	0.5714	0.7143	ENSG00000163635|ENST00000295900	mature-tRNA-Gly-GCC_5_end_5	0	52	57	52	57	973	6mer	x	6mer	0		0	ATXN7	protein_coding
ENSG00000161940	mature-tRNA-Glu-CTC_5_end_1	ENSG00000161940|ENST00000293805	167	-36.15	2	32	946	985	37	0.6216	0.7297	ENSG00000161940|ENST00000293805	mature-tRNA-Glu-CTC_5_end_1	0	23	28	23	28	992	6mer	x	6mer	0		0	BCL6B	protein_coding
ENSG00000161940	mature-tRNA-Glu-CTC_5_end_2	ENSG00000161940|ENST00000293805	164	-29.04	2	26	953	985	27	0.6296	0.7407	ENSG00000161940|ENST00000293805	mature-tRNA-Glu-CTC_5_end_2	0	23	28	23	28	993	6mer	x	6mer	0		0	BCL6B	protein_coding
ENSG00000161940	mature-tRNA-Glu-CTC_5_end_3	ENSG00000161940|ENST00000293805	166	-36.81	2	30	948	985	35	0.6286	0.7143	ENSG00000161940|ENST00000293805	mature-tRNA-Glu-CTC_5_end_3	0	23	28	23	28	994	6mer	x	6mer	0		0	BCL6B	protein_coding
ENSG00000161940	mature-tRNA-Glu-CTC_5_end_4	ENSG00000161940|ENST00000293805	172	-37.2	2	32	946	985	37	0.6216	0.7297	ENSG00000161940|ENST00000293805	mature-tRNA-Glu-CTC_5_end_4	0	23	28	23	28	995	6mer	x	6mer	0		0	BCL6B	protein_coding
ENSG00000164100	mature-tRNA-Gly-GCC_5_end_5	ENSG00000164100|ENST00000296499	155	-16.72	2	26	262	292	24	0.625	0.7083	ENSG00000164100|ENST00000296499	mature-tRNA-Gly-GCC_5_end_5	0	49	54	49	54	1019	6mer	x	6mer	0		0	NDST3	protein_coding
ENSG00000164548	mature-tRNA-Glu-TTC_5_end_1	ENSG00000164548|ENST00000297071	170	-27.17	2	31	713	742	29	0.6552	0.7241	ENSG00000164548|ENST00000297071	mature-tRNA-Glu-TTC_5_end_1	0	24	29	24	29	1031	6mer	x	6mer	0		0	TRA2A	protein_coding
ENSG00000153832	mature-tRNA-Gly-GCC_5_end_5	ENSG00000153832|ENST00000283946	149	-20.66	2	30	116	149	31	0.5806	0.6774	ENSG00000153832|ENST00000283946	mature-tRNA-Gly-GCC_5_end_5	0	17	23	17	23	1034	7mer-m8	x	7mer-m8	0		0	FBXO36	protein_coding
ENSG00000070882	mature-tRNA-Gly-GCC_5_end_5	ENSG00000070882|ENST00000313367	153	-17.93	2	28	1794	1824	26	0.5769	0.6923	ENSG00000070882|ENST00000313367	mature-tRNA-Gly-GCC_5_end_5	0	17	23	17	23	1042	7mer-1a	x	7mer-1a	0		0	OSBPL3	protein_coding
ENSG00000174903	mature-tRNA-Glu-CTC_5_end_1	ENSG00000174903|ENST00000311481	169	-34.62	2	30	837	869	28	0.6429	0.6786	ENSG00000174903|ENST00000311481	mature-tRNA-Glu-CTC_5_end_1	0	43	48	43	48	1049	6mer	x	6mer	0		0	RAB1B	protein_coding
ENSG00000174903	mature-tRNA-Glu-CTC_5_end_2	ENSG00000174903|ENST00000311481	168	-34.68	2	29	840	869	29	0.6552	0.7586	ENSG00000174903|ENST00000311481	mature-tRNA-Glu-CTC_5_end_2	0	43	48	43	48	1050	6mer	x	6mer	0		0	RAB1B	protein_coding
ENSG00000174903	mature-tRNA-Glu-CTC_5_end_3	ENSG00000174903|ENST00000311481	173	-34.69	2	30	839	869	30	0.6667	0.7667	ENSG00000174903|ENST00000311481	mature-tRNA-Glu-CTC_5_end_3	0	43	48	43	48	1051	6mer	x	6mer	0		0	RAB1B	protein_coding
ENSG00000174903	mature-tRNA-Glu-CTC_5_end_4	ENSG00000174903|ENST00000311481	173	-34.99	2	30	837	869	30	0.6667	0.7667	ENSG00000174903|ENST00000311481	mature-tRNA-Glu-CTC_5_end_4	0	43	48	43	48	1052	6mer	x	6mer	0		0	RAB1B	protein_coding
ENSG00000101445	mature-tRNA-Glu-CTC_5_end_1	ENSG00000101445|ENST00000299824	148	-27.68	2	32	2493	2528	33	0.5152	0.697	ENSG00000101445|ENST00000299824	mature-tRNA-Glu-CTC_5_end_1	0	20	26	20	26	1092	7mer-1a	x	7mer-1a	0		0	PPP1R16B	protein_coding
ENSG00000196616	mature-tRNA-Glu-TTC_5_end_1	ENSG00000196616|ENST00000305046	148	-31.31	2	32	2123	2158	33	0.5455	0.6667	ENSG00000196616|ENST00000305046	mature-tRNA-Glu-TTC_5_end_1	0	45	50	45	50	1096	6mer	x	6mer	0		0	ADH1B	protein_coding
ENSG00000119392	mature-tRNA-Gly-GCC_5_end_5	ENSG00000119392|ENST00000309971	156	-20	2	28	305	337	28	0.6071	0.7143	ENSG00000119392|ENST00000309971	mature-tRNA-Gly-GCC_5_end_5	0	19	24	19	24	1115	6mer	x	6mer	0		0	GLE1	protein_coding
ENSG00000166086	mature-tRNA-Glu-CTC_5_end_1	ENSG00000166086|ENST00000299106	169	-33.02	2	27	2651	2686	28	0.6786	0.7143	ENSG00000166086|ENST00000299106	mature-tRNA-Glu-CTC_5_end_1	0	49	55	49	55	1152	7mer-m8	x	7mer-m8	0		0	JAM3	protein_coding
ENSG00000166086	mature-tRNA-Glu-CTC_5_end_2	ENSG00000166086|ENST00000299106	169	-31.74	2	27	2654	2686	28	0.6786	0.7143	ENSG00000166086|ENST00000299106	mature-tRNA-Glu-CTC_5_end_2	0	49	55	49	55	1153	7mer-m8	x	7mer-m8	0		0	JAM3	protein_coding
ENSG00000166086	mature-tRNA-Glu-CTC_5_end_3	ENSG00000166086|ENST00000299106	169	-33.49	2	27	2653	2686	28	0.6786	0.7143	ENSG00000166086|ENST00000299106	mature-tRNA-Glu-CTC_5_end_3	0	49	55	49	55	1154	7mer-m8	x	7mer-m8	0		0	JAM3	protein_coding
ENSG00000166086	mature-tRNA-Glu-CTC_5_end_4	ENSG00000166086|ENST00000299106	169	-33.73	2	27	2651	2686	28	0.6786	0.7143	ENSG00000166086|ENST00000299106	mature-tRNA-Glu-CTC_5_end_4	0	49	55	49	55	1155	7mer-m8	x	7mer-m8	0		0	JAM3	protein_coding
ENSG00000135655	mature-tRNA-Gly-GCC_5_end_5	ENSG00000135655|ENST00000280377	152	-15.49	2	21	297	328	19	0.5789	0.7895	ENSG00000135655|ENST00000280377	mature-tRNA-Gly-GCC_5_end_5	0	17	22	17	22	1205	6mer	x	6mer	0		0	USP15	protein_coding
ENSG00000170860	mature-tRNA-Gly-GCC_5_end_5	ENSG00000170860|ENST00000306024	152	-20.29	2	23	1325	1359	24	0.6667	0.7083	ENSG00000170860|ENST00000306024	mature-tRNA-Gly-GCC_5_end_5	0	37	42	37	42	1241	6mer	x	6mer	0		0	LSM3	protein_coding
ENSG00000172461	mature-tRNA-Gly-GCC_5_end_5	ENSG00000172461|ENST00000302103	181	-31.08	2	31	2640	2670	30	0.6667	0.8667	ENSG00000172461|ENST00000302103	mature-tRNA-Gly-GCC_5_end_5	0	38	44	38	44	1242	7mer-1a	x	7mer-1a	0		0	FUT9	protein_coding
ENSG00000152133	mature-tRNA-Glu-CTC_5_end_1	ENSG00000152133|ENST00000281932	153	-31.39	2	31	483	518	32	0.5	0.6875	ENSG00000152133|ENST00000281932	mature-tRNA-Glu-CTC_5_end_1	0	23	28	23	28	1250	6mer	x	6mer	0		0	GPATCH11	protein_coding
ENSG00000152133	mature-tRNA-Glu-CTC_5_end_2	ENSG00000152133|ENST00000281932	159	-30.37	2	25	488	518	24	0.625	0.75	ENSG00000152133|ENST00000281932	mature-tRNA-Glu-CTC_5_end_2	0	23	28	23	28	1251	6mer	x	6mer	0		0	GPATCH11	protein_coding
ENSG00000152133	mature-tRNA-Glu-CTC_5_end_3	ENSG00000152133|ENST00000281932	159	-30.54	2	25	487	518	24	0.625	0.75	ENSG00000152133|ENST00000281932	mature-tRNA-Glu-CTC_5_end_3	0	23	28	23	28	1252	6mer	x	6mer	0		0	GPATCH11	protein_coding
ENSG00000152133	mature-tRNA-Glu-CTC_5_end_4	ENSG00000152133|ENST00000281932	159	-30.54	2	25	485	518	24	0.625	0.75	ENSG00000152133|ENST00000281932	mature-tRNA-Glu-CTC_5_end_4	0	23	28	23	28	1253	6mer	x	6mer	0		0	GPATCH11	protein_coding
ENSG00000164366	mature-tRNA-Glu-TTC_5_end_1	ENSG00000164366|ENST00000296824	150	-30.52	2	32	7068	7106	36	0.5556	0.7222	ENSG00000164366|ENST00000296824	mature-tRNA-Glu-TTC_5_end_1	0	26	31	26	31	1264	6mer	x	6mer	0		0	CCDC127	protein_coding
ENSG00000071794	mature-tRNA-Glu-TTC_5_end_1	ENSG00000071794|ENST00000310053	171	-29.97	2	31	1500	1532	30	0.6333	0.7667	ENSG00000071794|ENST00000310053	mature-tRNA-Glu-TTC_5_end_1	0	15	20	15	20	1285	6mer	x	6mer	0		0	HLTF	protein_coding
ENSG00000270149	mature-tRNA-Glu-TTC_5_end_1	ENSG00000270149|ENST00000289779	152	-27.42	2	28	718	752	29	0.5862	0.6897	ENSG00000270149|ENST00000289779	mature-tRNA-Glu-TTC_5_end_1	0	23	29	23	29	1311	7mer-m8	x	7mer-m8	0		0	AL591806.2	protein_coding
ENSG00000134717	mature-tRNA-Gly-GCC_5_end_5	ENSG00000134717|ENST00000313334	157	-19.24	2	31	1036	1066	30	0.6333	0.7	ENSG00000134717|ENST00000313334	mature-tRNA-Gly-GCC_5_end_5	0	36	41	36	41	1312	6mer	x	6mer	0		0	BTF3L4	protein_coding
ENSG00000146197	mature-tRNA-Gly-GCC_5_end_5	ENSG00000146197|ENST00000274938	161	-22.88	2	31	616	651	33	0.5455	0.697	ENSG00000146197|ENST00000274938	mature-tRNA-Gly-GCC_5_end_5	0	25	30	25	30	1315	6mer	x	6mer	0		0	SCUBE3	protein_coding
ENSG00000162981	mature-tRNA-Gly-GCC_5_end_5	ENSG00000162981|ENST00000295092	152	-14.27	2	24	3895	3924	22	0.5909	0.7727	ENSG00000162981|ENST00000295092	mature-tRNA-Gly-GCC_5_end_5	0	52	57	52	57	1368	6mer	x	6mer	0		0	LRATD1	protein_coding
ENSG00000162817	mature-tRNA-Glu-CTC_5_end_1	ENSG00000162817|ENST00000294889	156	-26.83	2	17	1134	1166	15	0.6667	0.9333	ENSG00000162817|ENST00000294889	mature-tRNA-Glu-CTC_5_end_1	0	39	44	39	44	1381	6mer	x	6mer	0		0	C1orf115	protein_coding
ENSG00000138642	mature-tRNA-Glu-CTC_5_end_1	ENSG00000138642|ENST00000273960	163	-29.17	2	24	2187	2219	22	0.6364	0.7727	ENSG00000138642|ENST00000273960	mature-tRNA-Glu-CTC_5_end_1	0	33	38	33	38	1409	6mer	x	6mer	0		0	HERC6	protein_coding
ENSG00000138642	mature-tRNA-Glu-CTC_5_end_2	ENSG00000138642|ENST00000273960	159	-25.51	2	24	2190	2219	22	0.5909	0.7727	ENSG00000138642|ENST00000273960	mature-tRNA-Glu-CTC_5_end_2	0	33	38	33	38	1410	6mer	x	6mer	0		0	HERC6	protein_coding
ENSG00000138642	mature-tRNA-Glu-CTC_5_end_3	ENSG00000138642|ENST00000273960	159	-25.68	2	24	2189	2219	22	0.5909	0.7727	ENSG00000138642|ENST00000273960	mature-tRNA-Glu-CTC_5_end_3	0	33	38	33	38	1411	6mer	x	6mer	0		0	HERC6	protein_coding
ENSG00000138642	mature-tRNA-Glu-CTC_5_end_4	ENSG00000138642|ENST00000273960	159	-27.47	2	24	2187	2219	22	0.5909	0.7727	ENSG00000138642|ENST00000273960	mature-tRNA-Glu-CTC_5_end_4	0	33	38	33	38	1412	6mer	x	6mer	0		0	HERC6	protein_coding
ENSG00000181284	mature-tRNA-Glu-CTC_5_end_1	ENSG00000181284|ENST00000323206	157	-38.54	2	28	47	78	26	0.5385	0.7692	ENSG00000181284|ENST00000323206	mature-tRNA-Glu-CTC_5_end_1	0	43	49	43	49	1447	7mer-m8	x	7mer-m8	0		0	TMEM102	protein_coding
ENSG00000285043	mature-tRNA-Gly-GCC_5_end_5	ENSG00000285043|ENST00000338110	159	-23.62	2	29	838	871	29	0.5862	0.6897	ENSG00000285043|ENST00000338110	mature-tRNA-Gly-GCC_5_end_5	0	51	57	51	57	1456	7mer-m8	x	7mer-m8	0		0	AC093512.2	protein_coding
ENSG00000179673	mature-tRNA-Glu-TTC_5_end_1	ENSG00000179673|ENST00000322329	155	-27.39	2	31	197	227	29	0.5517	0.6897	ENSG00000179673|ENST00000322329	mature-tRNA-Glu-TTC_5_end_1	0	43	48	43	48	1480	6mer	x	6mer	0		0	RPRML	protein_coding
ENSG00000106785	mature-tRNA-Glu-CTC_5_end_1	ENSG00000106785|ENST00000341469	173	-30.69	2	27	2474	2507	26	0.6538	0.8077	ENSG00000106785|ENST00000341469	mature-tRNA-Glu-CTC_5_end_1	0	26	32	26	32	1489	7mer-m8	x	7mer-m8	0		0	TRIM14	protein_coding
ENSG00000106785	mature-tRNA-Glu-CTC_5_end_2	ENSG00000106785|ENST00000341469	169	-26.02	2	27	2477	2507	26	0.6154	0.8077	ENSG00000106785|ENST00000341469	mature-tRNA-Glu-CTC_5_end_2	0	26	32	26	32	1490	7mer-m8	x	7mer-m8	0		0	TRIM14	protein_coding
ENSG00000106785	mature-tRNA-Glu-CTC_5_end_3	ENSG00000106785|ENST00000341469	169	-26.02	2	27	2476	2507	26	0.6154	0.8077	ENSG00000106785|ENST00000341469	mature-tRNA-Glu-CTC_5_end_3	0	26	32	26	32	1491	7mer-m8	x	7mer-m8	0		0	TRIM14	protein_coding
ENSG00000106785	mature-tRNA-Glu-CTC_5_end_4	ENSG00000106785|ENST00000341469	169	-28.53	2	27	2474	2507	26	0.6154	0.8077	ENSG00000106785|ENST00000341469	mature-tRNA-Glu-CTC_5_end_4	0	26	32	26	32	1492	7mer-m8	x	7mer-m8	0		0	TRIM14	protein_coding
ENSG00000036257	mature-tRNA-Glu-TTC_5_end_1	ENSG00000036257|ENST00000344951	148	-21.26	2	28	4039	4071	27	0.5926	0.6667	ENSG00000036257|ENST00000344951	mature-tRNA-Glu-TTC_5_end_1	0	27	32	27	32	1497	6mer	x	6mer	0		0	CUL3	protein_coding
ENSG00000166037	mature-tRNA-Glu-CTC_5_end_1	ENSG00000166037|ENST00000325542	158	-28.83	2	30	161	198	33	0.6061	0.697	ENSG00000166037|ENST00000325542	mature-tRNA-Glu-CTC_5_end_1	0	36	42	36	42	1536	7mer-m8	x	7mer-m8	0		0	CEP57	protein_coding
ENSG00000166037	mature-tRNA-Glu-CTC_5_end_2	ENSG00000166037|ENST00000325542	151	-26.84	2	27	164	198	30	0.6	0.7	ENSG00000166037|ENST00000325542	mature-tRNA-Glu-CTC_5_end_2	0	36	42	36	42	1537	7mer-m8	x	7mer-m8	0		0	CEP57	protein_coding
ENSG00000166037	mature-tRNA-Glu-CTC_5_end_3	ENSG00000166037|ENST00000325542	154	-26.84	2	30	163	198	33	0.5758	0.697	ENSG00000166037|ENST00000325542	mature-tRNA-Glu-CTC_5_end_3	0	36	42	36	42	1538	7mer-m8	x	7mer-m8	0		0	CEP57	protein_coding
ENSG00000166037	mature-tRNA-Glu-CTC_5_end_4	ENSG00000166037|ENST00000325542	154	-26.89	2	30	161	198	33	0.5758	0.697	ENSG00000166037|ENST00000325542	mature-tRNA-Glu-CTC_5_end_4	0	36	42	36	42	1539	7mer-m8	x	7mer-m8	0		0	CEP57	protein_coding
ENSG00000116237	mature-tRNA-Glu-CTC_5_end_1	ENSG00000116237|ENST00000343813	152	-32.58	2	31	2477	2512	32	0.5312	0.6875	ENSG00000116237|ENST00000343813	mature-tRNA-Glu-CTC_5_end_1	0	33	39	33	39	1571	7mer-m8	x	7mer-m8	0		0	ICMT	protein_coding
ENSG00000116237	mature-tRNA-Glu-CTC_5_end_2	ENSG00000116237|ENST00000343813	151	-27.33	2	27	2488	2512	25	0.64	0.72	ENSG00000116237|ENST00000343813	mature-tRNA-Glu-CTC_5_end_2	0	33	39	33	39	1572	7mer-m8	x	7mer-m8	0		0	ICMT	protein_coding
ENSG00000116237	mature-tRNA-Glu-CTC_5_end_3	ENSG00000116237|ENST00000343813	151	-28.68	2	27	2487	2512	25	0.64	0.72	ENSG00000116237|ENST00000343813	mature-tRNA-Glu-CTC_5_end_3	0	33	39	33	39	1573	7mer-m8	x	7mer-m8	0		0	ICMT	protein_coding
ENSG00000116237	mature-tRNA-Glu-CTC_5_end_4	ENSG00000116237|ENST00000343813	151	-30.9	2	27	2485	2512	25	0.64	0.72	ENSG00000116237|ENST00000343813	mature-tRNA-Glu-CTC_5_end_4	0	33	39	33	39	1574	7mer-m8	x	7mer-m8	0		0	ICMT	protein_coding
ENSG00000196646	mature-tRNA-Gly-GCC_5_end_5	ENSG00000196646|ENST00000343979	163	-21.05	2	28	187	223	32	0.6562	0.7188	ENSG00000196646|ENST00000343979	mature-tRNA-Gly-GCC_5_end_5	0	36	41	36	41	1662	6mer	x	6mer	0		0	ZNF136	protein_coding
ENSG00000189334	mature-tRNA-Glu-CTC_5_end_1	ENSG00000189334|ENST00000344616	149	-28.46	2	28	195	229	28	0.5357	0.7143	ENSG00000189334|ENST00000344616	mature-tRNA-Glu-CTC_5_end_1	0	24	29	24	29	1664	6mer	x	6mer	0		0	S100A14	protein_coding
ENSG00000121904	mature-tRNA-Glu-CTC_5_end_1	ENSG00000121904|ENST00000338325	148	-26.74	2	14	1	24	14	0.7857	0.8571	ENSG00000121904|ENST00000338325	mature-tRNA-Glu-CTC_5_end_1	0	38	43	38	43	1669	6mer	x	6mer	0		0	CSMD2	protein_coding
ENSG00000150510	mature-tRNA-Gly-CCC_5_end_1	ENSG00000150510|ENST00000322475	154	-18	2	28	2253	2284	29	0.5517	0.6897	ENSG00000150510|ENST00000322475	mature-tRNA-Gly-CCC_5_end_1	0	18	24	18	24	1683	7mer-1a	x	7mer-1a	0		0	FAM124A	protein_coding
ENSG00000150510	mature-tRNA-Gly-GCC_5_end_1	ENSG00000150510|ENST00000322475	154	-20.6	2	28	2251	2284	29	0.5517	0.6897	ENSG00000150510|ENST00000322475	mature-tRNA-Gly-GCC_5_end_1	0	18	24	18	24	1684	7mer-1a	x	7mer-1a	0		0	FAM124A	protein_coding
ENSG00000150510	mature-tRNA-Gly-GCC_5_end_2	ENSG00000150510|ENST00000322475	154	-20.6	2	28	2250	2284	29	0.5517	0.6897	ENSG00000150510|ENST00000322475	mature-tRNA-Gly-GCC_5_end_2	0	18	24	18	24	1685	7mer-1a	x	7mer-1a	0		0	FAM124A	protein_coding
ENSG00000150510	mature-tRNA-Gly-GCC_5_end_3	ENSG00000150510|ENST00000322475	154	-22.26	2	28	2249	2284	29	0.5517	0.6897	ENSG00000150510|ENST00000322475	mature-tRNA-Gly-GCC_5_end_3	0	18	24	18	24	1686	7mer-1a	x	7mer-1a	0		0	FAM124A	protein_coding
ENSG00000150510	mature-tRNA-Gly-GCC_5_end_4	ENSG00000150510|ENST00000322475	154	-22.53	2	28	2248	2284	29	0.5517	0.6897	ENSG00000150510|ENST00000322475	mature-tRNA-Gly-GCC_5_end_4	0	18	24	18	24	1687	7mer-1a	x	7mer-1a	0		0	FAM124A	protein_coding
ENSG00000179021	mature-tRNA-Glu-TTC_5_end_1	ENSG00000179021|ENST00000318887	159	-26.09	2	25	333	369	27	0.6296	0.7037	ENSG00000179021|ENST00000318887	mature-tRNA-Glu-TTC_5_end_1	0	37	42	37	42	1749	6mer	x	6mer	0		0	C3orf38	protein_coding
ENSG00000148334	mature-tRNA-Glu-CTC_5_end_1	ENSG00000148334|ENST00000338961	158	-32.43	2	21	22	53	19	0.6842	0.8421	ENSG00000148334|ENST00000338961	mature-tRNA-Glu-CTC_5_end_1	0	21	27	21	27	1750	7mer-1a	x	7mer-1a	0		0	PTGES2	protein_coding
ENSG00000188315	mature-tRNA-Glu-CTC_5_end_1	ENSG00000188315|ENST00000343010	174	-34.88	2	27	1130	1163	27	0.7407	0.8148	ENSG00000188315|ENST00000343010	mature-tRNA-Glu-CTC_5_end_1	0	46	53	46	53	1759	8mer-1a	x	8mer-1a	0		0	C3orf62	protein_coding
ENSG00000144115	mature-tRNA-Glu-CTC_5_end_1	ENSG00000144115|ENST00000343544	166	-36.88	2	32	409	438	30	0.6	0.7667	ENSG00000144115|ENST00000343544	mature-tRNA-Glu-CTC_5_end_1	0	17	24	17	24	1784	8mer-1a	x	8mer-1a	0		0	THNSL2	protein_coding
ENSG00000144115	mature-tRNA-Glu-CTC_5_end_2	ENSG00000144115|ENST00000343544	159	-33.82	2	29	412	438	27	0.5926	0.7778	ENSG00000144115|ENST00000343544	mature-tRNA-Glu-CTC_5_end_2	0	17	24	17	24	1785	8mer-1a	x	8mer-1a	0		0	THNSL2	protein_coding
ENSG00000144115	mature-tRNA-Glu-CTC_5_end_3	ENSG00000144115|ENST00000343544	159	-39.77	2	30	401	438	35	0.5429	0.7143	ENSG00000144115|ENST00000343544	mature-tRNA-Glu-CTC_5_end_3	0	17	24	17	24	1786	8mer-1a	x	8mer-1a	0		0	THNSL2	protein_coding
ENSG00000144115	mature-tRNA-Glu-CTC_5_end_4	ENSG00000144115|ENST00000343544	162	-34.11	2	32	409	438	30	0.5667	0.7667	ENSG00000144115|ENST00000343544	mature-tRNA-Glu-CTC_5_end_4	0	17	24	17	24	1787	8mer-1a	x	8mer-1a	0		0	THNSL2	protein_coding
ENSG00000115325	mature-tRNA-Glu-CTC_5_end_1	ENSG00000115325|ENST00000340004	149	-29.49	2	28	820	851	26	0.5	0.7308	ENSG00000115325|ENST00000340004	mature-tRNA-Glu-CTC_5_end_1	0	17	24	17	24	1788	8mer-1a	x	8mer-1a	0		0	DOK1	protein_coding
ENSG00000115325	mature-tRNA-Glu-CTC_5_end_2	ENSG00000115325|ENST00000340004	149	-23.3	2	28	823	851	26	0.5	0.7308	ENSG00000115325|ENST00000340004	mature-tRNA-Glu-CTC_5_end_2	0	17	24	17	24	1789	8mer-1a	x	8mer-1a	0		0	DOK1	protein_coding
ENSG00000115325	mature-tRNA-Glu-CTC_5_end_3	ENSG00000115325|ENST00000340004	149	-26.5	2	28	822	851	26	0.5	0.7308	ENSG00000115325|ENST00000340004	mature-tRNA-Glu-CTC_5_end_3	0	17	24	17	24	1790	8mer-1a	x	8mer-1a	0		0	DOK1	protein_coding
ENSG00000115325	mature-tRNA-Glu-CTC_5_end_4	ENSG00000115325|ENST00000340004	149	-26.8	2	28	820	851	26	0.5	0.7308	ENSG00000115325|ENST00000340004	mature-tRNA-Glu-CTC_5_end_4	0	17	24	17	24	1791	8mer-1a	x	8mer-1a	0		0	DOK1	protein_coding
ENSG00000065029	mature-tRNA-Glu-CTC_5_end_1	ENSG00000065029|ENST00000339411	194	-47.5	2	31	451	484	31	0.7419	0.871	ENSG00000065029|ENST00000339411	mature-tRNA-Glu-CTC_5_end_1	0	21	26	21	26	1798	6mer	x	6mer	0		0	ZNF76	protein_coding
ENSG00000065029	mature-tRNA-Glu-CTC_5_end_2	ENSG00000065029|ENST00000339411	181	-39.44	2	28	456	484	26	0.6923	0.8462	ENSG00000065029|ENST00000339411	mature-tRNA-Glu-CTC_5_end_2	0	21	26	21	26	1799	6mer	x	6mer	0		0	ZNF76	protein_coding
ENSG00000065029	mature-tRNA-Glu-CTC_5_end_3	ENSG00000065029|ENST00000339411	185	-45.21	2	30	453	484	30	0.7	0.8667	ENSG00000065029|ENST00000339411	mature-tRNA-Glu-CTC_5_end_3	0	21	26	21	26	1800	6mer	x	6mer	0		0	ZNF76	protein_coding
ENSG00000065029	mature-tRNA-Glu-CTC_5_end_4	ENSG00000065029|ENST00000339411	190	-45.21	2	31	451	484	31	0.7097	0.871	ENSG00000065029|ENST00000339411	mature-tRNA-Glu-CTC_5_end_4	0	21	26	21	26	1801	6mer	x	6mer	0		0	ZNF76	protein_coding
ENSG00000069345	mature-tRNA-Glu-CTC_5_end_1	ENSG00000069345|ENST00000317089	156	-25.09	2	27	810	841	25	0.6	0.72	ENSG00000069345|ENST00000317089	mature-tRNA-Glu-CTC_5_end_1	0	52	57	52	57	1835	6mer	x	6mer	0		0	DNAJA2	protein_coding
ENSG00000164066	mature-tRNA-Gly-GCC_5_end_5	ENSG00000164066|ENST00000335251	159	-11.59	2	24	9843	9874	22	0.5909	0.7727	ENSG00000164066|ENST00000335251	mature-tRNA-Gly-GCC_5_end_5	0	25	30	25	30	1853	6mer	x	6mer	0		0	INTU	protein_coding
ENSG00000185658	mature-tRNA-Gly-GCC_5_end_5	ENSG00000185658|ENST00000342449	159	-23.96	2	28	6361	6392	26	0.5769	0.6923	ENSG00000185658|ENST00000342449	mature-tRNA-Gly-GCC_5_end_5	0	30	35	30	35	1854	6mer	x	6mer	0		0	BRWD1	protein_coding
ENSG00000185436	mature-tRNA-Gly-CCC_5_end_1	ENSG00000185436|ENST00000327535	159	-22.91	2	24	1170	1198	22	0.6364	0.7273	ENSG00000185436|ENST00000327535	mature-tRNA-Gly-CCC_5_end_1	0	30	36	30	36	1858	7mer-m8	x	7mer-m8	0		0	IFNLR1	protein_coding
ENSG00000185436	mature-tRNA-Gly-GCC_5_end_1	ENSG00000185436|ENST00000327535	159	-23.73	2	24	1168	1198	22	0.6364	0.7273	ENSG00000185436|ENST00000327535	mature-tRNA-Gly-GCC_5_end_1	0	30	36	30	36	1859	7mer-m8	x	7mer-m8	0		0	IFNLR1	protein_coding
ENSG00000185436	mature-tRNA-Gly-GCC_5_end_2	ENSG00000185436|ENST00000327535	159	-24.23	2	24	1167	1198	22	0.6364	0.7273	ENSG00000185436|ENST00000327535	mature-tRNA-Gly-GCC_5_end_2	0	30	36	30	36	1860	7mer-m8	x	7mer-m8	0		0	IFNLR1	protein_coding
ENSG00000185436	mature-tRNA-Gly-GCC_5_end_3	ENSG00000185436|ENST00000327535	159	-24.23	2	24	1166	1198	22	0.6364	0.7273	ENSG00000185436|ENST00000327535	mature-tRNA-Gly-GCC_5_end_3	0	30	36	30	36	1861	7mer-m8	x	7mer-m8	0		0	IFNLR1	protein_coding
ENSG00000185436	mature-tRNA-Gly-GCC_5_end_4	ENSG00000185436|ENST00000327535	159	-24.23	2	24	1165	1198	22	0.6364	0.7273	ENSG00000185436|ENST00000327535	mature-tRNA-Gly-GCC_5_end_4	0	30	36	30	36	1862	7mer-m8	x	7mer-m8	0		0	IFNLR1	protein_coding
ENSG00000109066	mature-tRNA-Glu-CTC_5_end_1	ENSG00000109066|ENST00000335464	156	-34.63	2	32	2039	2072	32	0.5625	0.6875	ENSG00000109066|ENST00000335464	mature-tRNA-Glu-CTC_5_end_1	0	19	24	19	24	1888	6mer	x	6mer	0		0	TMEM104	protein_coding
ENSG00000178568	mature-tRNA-Glu-CTC_5_end_1	ENSG00000178568|ENST00000342788	163	-35.79	2	32	6724	6756	30	0.5333	0.7	ENSG00000178568|ENST00000342788	mature-tRNA-Glu-CTC_5_end_1	0	55	60	55	60	1894	6mer	x	6mer	0		0	ERBB4	protein_coding
ENSG00000178568	mature-tRNA-Glu-CTC_5_end_2	ENSG00000178568|ENST00000342788	168	-34.6	2	25	6727	6756	23	0.6522	0.7826	ENSG00000178568|ENST00000342788	mature-tRNA-Glu-CTC_5_end_2	0	55	60	55	60	1895	6mer	x	6mer	0		0	ERBB4	protein_coding
ENSG00000178568	mature-tRNA-Glu-CTC_5_end_3	ENSG00000178568|ENST00000342788	168	-36.82	2	25	6726	6756	23	0.6522	0.7826	ENSG00000178568|ENST00000342788	mature-tRNA-Glu-CTC_5_end_3	0	55	60	55	60	1896	6mer	x	6mer	0		0	ERBB4	protein_coding
ENSG00000178568	mature-tRNA-Glu-CTC_5_end_4	ENSG00000178568|ENST00000342788	171	-39.59	2	32	6724	6756	30	0.5667	0.7333	ENSG00000178568|ENST00000342788	mature-tRNA-Glu-CTC_5_end_4	0	55	60	55	60	1897	6mer	x	6mer	0		0	ERBB4	protein_coding
ENSG00000178568	mature-tRNA-Gly-GCC_5_end_5	ENSG00000178568|ENST00000342788	148	-18.02	2	30	1642	1672	29	0.5862	0.6897	ENSG00000178568|ENST00000342788	mature-tRNA-Gly-GCC_5_end_5	0	28	35	28	35	1898	8mer-1a	x	8mer-1a	0		0	ERBB4	protein_coding
ENSG00000148344	mature-tRNA-Glu-CTC_5_end_1	ENSG00000148344|ENST00000340607	157	-32.86	2	29	783	815	28	0.5714	0.75	ENSG00000148344|ENST00000340607	mature-tRNA-Glu-CTC_5_end_1	0	32	37	32	37	1899	6mer	x	6mer	0		0	PTGES	protein_coding
ENSG00000151623	mature-tRNA-Gly-GCC_5_end_5	ENSG00000151623|ENST00000344721	152	-20.38	2	30	2142	2168	29	0.6207	0.7241	ENSG00000151623|ENST00000344721	mature-tRNA-Gly-GCC_5_end_5	0	28	33	28	33	1914	6mer	x	6mer	0		0	NR3C2	protein_coding
ENSG00000165633	mature-tRNA-Val-AAC_5_end_1	ENSG00000165633|ENST00000332853	159	-20.24	2	16	2010	2027	14	0.8571	0.8571	ENSG00000165633|ENST00000332853	mature-tRNA-Val-AAC_5_end_1	0	37	43	37	43	1965	7mer-m8	x	7mer-m8	0		0	VSTM4	protein_coding
ENSG00000165633	mature-tRNA-Val-CAC_5_end_1	ENSG00000165633|ENST00000332853	168	-26.41	2	21	1995	2027	19	0.7368	0.8421	ENSG00000165633|ENST00000332853	mature-tRNA-Val-CAC_5_end_1	0	37	43	37	43	1966	7mer-m8	x	7mer-m8	0		0	VSTM4	protein_coding
ENSG00000189269	mature-tRNA-Glu-CTC_5_end_1	ENSG00000189269|ENST00000317749	151	-25.51	2	27	1	26	26	0.5385	0.7692	ENSG00000189269|ENST00000317749	mature-tRNA-Glu-CTC_5_end_1	0	37	42	37	42	2027	6mer	x	6mer	0		0	DRICH1	protein_coding
ENSG00000189269	mature-tRNA-Glu-CTC_5_end_2	ENSG00000189269|ENST00000317749	150	-24.17	2	27	1	26	27	0.5926	0.7037	ENSG00000189269|ENST00000317749	mature-tRNA-Glu-CTC_5_end_2	0	37	42	37	42	2028	6mer	x	6mer	0		0	DRICH1	protein_coding
ENSG00000189269	mature-tRNA-Glu-CTC_5_end_3	ENSG00000189269|ENST00000317749	150	-24.34	2	27	1	26	27	0.5926	0.7037	ENSG00000189269|ENST00000317749	mature-tRNA-Glu-CTC_5_end_3	0	37	42	37	42	2029	6mer	x	6mer	0		0	DRICH1	protein_coding
ENSG00000189269	mature-tRNA-Glu-CTC_5_end_4	ENSG00000189269|ENST00000317749	150	-24.44	2	27	1	26	27	0.5926	0.7037	ENSG00000189269|ENST00000317749	mature-tRNA-Glu-CTC_5_end_4	0	37	42	37	42	2030	6mer	x	6mer	0		0	DRICH1	protein_coding
ENSG00000100023	mature-tRNA-Glu-CTC_5_end_1	ENSG00000100023|ENST00000335025	170	-32.49	2	31	2264	2296	29	0.5862	0.7241	ENSG00000100023|ENST00000335025	mature-tRNA-Glu-CTC_5_end_1	0	32	37	32	37	2034	6mer	x	6mer	0		0	PPIL2	protein_coding
ENSG00000100023	mature-tRNA-Glu-CTC_5_end_2	ENSG00000100023|ENST00000335025	168	-29.72	2	29	2267	2296	27	0.5926	0.7407	ENSG00000100023|ENST00000335025	mature-tRNA-Glu-CTC_5_end_2	0	32	37	32	37	2035	6mer	x	6mer	0		0	PPIL2	protein_coding
ENSG00000100023	mature-tRNA-Glu-CTC_5_end_3	ENSG00000100023|ENST00000335025	168	-30.6	2	29	2266	2296	27	0.5926	0.7407	ENSG00000100023|ENST00000335025	mature-tRNA-Glu-CTC_5_end_3	0	32	37	32	37	2036	6mer	x	6mer	0		0	PPIL2	protein_coding
ENSG00000100023	mature-tRNA-Glu-CTC_5_end_4	ENSG00000100023|ENST00000335025	170	-32.2	2	31	2264	2296	29	0.5862	0.7241	ENSG00000100023|ENST00000335025	mature-tRNA-Glu-CTC_5_end_4	0	32	37	32	37	2037	6mer	x	6mer	0		0	PPIL2	protein_coding
ENSG00000260238	mature-tRNA-Glu-TTC_5_end_1	ENSG00000260238|ENST00000320139	163	-30.43	2	32	160	190	30	0.6333	0.7	ENSG00000260238|ENST00000320139	mature-tRNA-Glu-TTC_5_end_1	0	24	29	24	29	2045	6mer	x	6mer	0		0	PMF1-BGLAP	protein_coding
ENSG00000189079	mature-tRNA-Gly-CCC_5_end_1	ENSG00000189079|ENST00000334344	164	-19.04	2	26	1896	1927	27	0.5926	0.7778	ENSG00000189079|ENST00000334344	mature-tRNA-Gly-CCC_5_end_1	0	37	44	37	44	2048	8mer-1a	x	8mer-1a	0		0	ARID2	protein_coding
ENSG00000189079	mature-tRNA-Gly-GCC_5_end_1	ENSG00000189079|ENST00000334344	164	-19.04	2	26	1895	1927	27	0.5926	0.7778	ENSG00000189079|ENST00000334344	mature-tRNA-Gly-GCC_5_end_1	0	37	44	37	44	2049	8mer-1a	x	8mer-1a	0		0	ARID2	protein_coding
ENSG00000189079	mature-tRNA-Gly-GCC_5_end_2	ENSG00000189079|ENST00000334344	164	-19.04	2	26	1893	1927	27	0.5926	0.7778	ENSG00000189079|ENST00000334344	mature-tRNA-Gly-GCC_5_end_2	0	37	44	37	44	2050	8mer-1a	x	8mer-1a	0		0	ARID2	protein_coding
ENSG00000189079	mature-tRNA-Gly-GCC_5_end_3	ENSG00000189079|ENST00000334344	164	-19.04	2	26	1892	1927	27	0.5926	0.7778	ENSG00000189079|ENST00000334344	mature-tRNA-Gly-GCC_5_end_3	0	37	44	37	44	2051	8mer-1a	x	8mer-1a	0		0	ARID2	protein_coding
ENSG00000189079	mature-tRNA-Gly-GCC_5_end_4	ENSG00000189079|ENST00000334344	164	-19.04	2	26	1891	1927	27	0.5926	0.7778	ENSG00000189079|ENST00000334344	mature-tRNA-Gly-GCC_5_end_4	0	37	44	37	44	2052	8mer-1a	x	8mer-1a	0		0	ARID2	protein_coding
ENSG00000180011	mature-tRNA-Glu-CTC_5_end_1	ENSG00000180011|ENST00000322342	149	-27.86	2	32	2593	2624	30	0.4667	0.7	ENSG00000180011|ENST00000322342	mature-tRNA-Glu-CTC_5_end_1	0	27	34	27	34	2074	8mer-1a	x	8mer-1a	0		0	ZADH2	protein_coding
ENSG00000182318	mature-tRNA-Glu-CTC_5_end_1	ENSG00000182318|ENST00000329665	158	-29.08	2	28	282	316	28	0.5357	0.75	ENSG00000182318|ENST00000329665	mature-tRNA-Glu-CTC_5_end_1	0	53	58	53	58	2115	6mer	x	6mer	0		0	ZSCAN22	protein_coding
ENSG00000182318	mature-tRNA-Glu-CTC_5_end_2	ENSG00000182318|ENST00000329665	151	-26.43	2	24	2542	2571	22	0.5909	0.6818	ENSG00000182318|ENST00000329665	mature-tRNA-Glu-CTC_5_end_2	0	53	58	53	58	2117	6mer	x	6mer	0		0	ZSCAN22	protein_coding
ENSG00000182318	mature-tRNA-Glu-CTC_5_end_3	ENSG00000182318|ENST00000329665	153	-26.43	2	30	2541	2571	28	0.5357	0.6429	ENSG00000182318|ENST00000329665	mature-tRNA-Glu-CTC_5_end_3	0	53	58	53	58	2119	6mer	x	6mer	0		0	ZSCAN22	protein_coding
ENSG00000182318	mature-tRNA-Glu-CTC_5_end_4	ENSG00000182318|ENST00000329665	155	-27.52	2	32	2539	2571	30	0.5333	0.6333	ENSG00000182318|ENST00000329665	mature-tRNA-Glu-CTC_5_end_4	0	53	58	53	58	2121	6mer	x	6mer	0		0	ZSCAN22	protein_coding
ENSG00000165175	mature-tRNA-Glu-CTC_5_end_1	ENSG00000165175|ENST00000336949	151	-31.71	2	28	323	355	28	0.5714	0.7143	ENSG00000165175|ENST00000336949	mature-tRNA-Glu-CTC_5_end_1	0	48	54	48	54	2136	7mer-m8	x	7mer-m8	0		0	MID1IP1	protein_coding
ENSG00000165175	mature-tRNA-Glu-CTC_5_end_2	ENSG00000165175|ENST00000336949	147	-28.12	2	28	326	355	28	0.5357	0.7143	ENSG00000165175|ENST00000336949	mature-tRNA-Glu-CTC_5_end_2	0	48	54	48	54	2137	7mer-m8	x	7mer-m8	0		0	MID1IP1	protein_coding
ENSG00000165175	mature-tRNA-Glu-CTC_5_end_3	ENSG00000165175|ENST00000336949	147	-28.12	2	28	325	355	28	0.5357	0.7143	ENSG00000165175|ENST00000336949	mature-tRNA-Glu-CTC_5_end_3	0	48	54	48	54	2138	7mer-m8	x	7mer-m8	0		0	MID1IP1	protein_coding
ENSG00000165175	mature-tRNA-Glu-CTC_5_end_4	ENSG00000165175|ENST00000336949	147	-30.74	2	28	323	355	28	0.5357	0.7143	ENSG00000165175|ENST00000336949	mature-tRNA-Glu-CTC_5_end_4	0	48	54	48	54	2139	7mer-m8	x	7mer-m8	0		0	MID1IP1	protein_coding
ENSG00000142961	mature-tRNA-Glu-TTC_5_end_1	ENSG00000142961|ENST00000319928	157	-28.83	2	28	295	330	29	0.5862	0.7241	ENSG00000142961|ENST00000319928	mature-tRNA-Glu-TTC_5_end_1	0	24	29	24	29	2148	6mer	x	6mer	0		0	MOB3C	protein_coding
ENSG00000116337	mature-tRNA-Glu-CTC_5_end_1	ENSG00000116337|ENST00000358729	158	-36.2	2	25	342	380	29	0.6207	0.7241	ENSG00000116337|ENST00000358729	mature-tRNA-Glu-CTC_5_end_1	0	29	34	29	34	2236	6mer	x	6mer	0		0	AMPD2	protein_coding
ENSG00000170633	mature-tRNA-Glu-TTC_5_end_1	ENSG00000170633|ENST00000361234	174	-33	2	28	245	278	27	0.6296	0.8148	ENSG00000170633|ENST00000361234	mature-tRNA-Glu-TTC_5_end_1	0	15	20	15	20	2252	6mer	x	6mer	0		0	RNF34	protein_coding
ENSG00000198142	mature-tRNA-Glu-TTC_5_end_1	ENSG00000198142|ENST00000356454	156	-24.06	2	28	2047	2077	27	0.7037	0.7407	ENSG00000198142|ENST00000356454	mature-tRNA-Glu-TTC_5_end_1	0	48	54	48	54	2260	7mer-1a	x	7mer-1a	0		0	SOWAHC	protein_coding
ENSG00000243364	mature-tRNA-Glu-CTC_5_end_1	ENSG00000243364|ENST00000359751	151	-26.16	2	31	220	247	29	0.5172	0.7586	ENSG00000243364|ENST00000359751	mature-tRNA-Glu-CTC_5_end_1	0	31	36	31	36	2267	6mer	x	6mer	0		0	EFNA4	protein_coding
ENSG00000243364	mature-tRNA-Glu-CTC_5_end_2	ENSG00000243364|ENST00000359751	149	-22.7	2	29	223	247	27	0.5185	0.7778	ENSG00000243364|ENST00000359751	mature-tRNA-Glu-CTC_5_end_2	0	31	36	31	36	2268	6mer	x	6mer	0		0	EFNA4	protein_coding
ENSG00000243364	mature-tRNA-Glu-CTC_5_end_3	ENSG00000243364|ENST00000359751	149	-22.87	2	29	222	247	27	0.5185	0.7778	ENSG00000243364|ENST00000359751	mature-tRNA-Glu-CTC_5_end_3	0	31	36	31	36	2269	6mer	x	6mer	0		0	EFNA4	protein_coding
ENSG00000243364	mature-tRNA-Glu-CTC_5_end_4	ENSG00000243364|ENST00000359751	151	-23.72	2	31	220	247	29	0.5172	0.7586	ENSG00000243364|ENST00000359751	mature-tRNA-Glu-CTC_5_end_4	0	31	36	31	36	2270	6mer	x	6mer	0		0	EFNA4	protein_coding
ENSG00000118004	mature-tRNA-Glu-CTC_5_end_1	ENSG00000118004|ENST00000349077	176	-36.72	2	30	55	88	29	0.6207	0.7931	ENSG00000118004|ENST00000349077	mature-tRNA-Glu-CTC_5_end_1	0	33	39	33	39	2271	7mer-1a	x	7mer-1a	0		0	COLEC11	protein_coding
ENSG00000154027	mature-tRNA-Glu-TTC_5_end_1	ENSG00000154027|ENST00000354567	155	-22.38	2	26	899	929	26	0.6923	0.6923	ENSG00000154027|ENST00000354567	mature-tRNA-Glu-TTC_5_end_1	0	30	36	30	36	2316	7mer-m8	x	7mer-m8	0		0	AK5	protein_coding
ENSG00000151655	mature-tRNA-Gly-GCC_5_end_5	ENSG00000151655|ENST00000358415	155	-14.4	2	28	158	186	26	0.5769	0.7308	ENSG00000151655|ENST00000358415	mature-tRNA-Gly-GCC_5_end_5	0	16	21	16	21	2340	6mer	x	6mer	0		0	ITIH2	protein_coding
ENSG00000143420	mature-tRNA-Glu-CTC_5_end_1	ENSG00000143420|ENST00000361631	158	-30.65	2	32	66	99	31	0.5484	0.6774	ENSG00000143420|ENST00000361631	mature-tRNA-Glu-CTC_5_end_1	0	49	54	49	54	2341	6mer	x	6mer	0		0	ENSA	protein_coding
ENSG00000167491	mature-tRNA-Glu-CTC_5_end_1	ENSG00000167491|ENST00000360315	168	-36.71	2	32	2035	2071	34	0.5588	0.7941	ENSG00000167491|ENST00000360315	mature-tRNA-Glu-CTC_5_end_1	0	45	50	45	50	2372	6mer	x	6mer	0		0	GATAD2A	protein_coding
ENSG00000167491	mature-tRNA-Glu-CTC_5_end_2	ENSG00000167491|ENST00000360315	158	-31.77	2	29	2039	2071	30	0.5	0.8	ENSG00000167491|ENST00000360315	mature-tRNA-Glu-CTC_5_end_2	0	45	50	45	50	2373	6mer	x	6mer	0		0	GATAD2A	protein_coding
ENSG00000167491	mature-tRNA-Glu-CTC_5_end_3	ENSG00000167491|ENST00000360315	159	-31.94	2	30	2038	2071	31	0.4839	0.8065	ENSG00000167491|ENST00000360315	mature-tRNA-Glu-CTC_5_end_3	0	45	50	45	50	2374	6mer	x	6mer	0		0	GATAD2A	protein_coding
ENSG00000167491	mature-tRNA-Glu-CTC_5_end_4	ENSG00000167491|ENST00000360315	164	-33.94	2	32	2035	2071	34	0.5294	0.7941	ENSG00000167491|ENST00000360315	mature-tRNA-Glu-CTC_5_end_4	0	45	50	45	50	2375	6mer	x	6mer	0		0	GATAD2A	protein_coding
ENSG00000090539	mature-tRNA-Glu-CTC_5_end_1	ENSG00000090539|ENST00000356534	157	-36.08	2	32	33	68	33	0.5758	0.6667	ENSG00000090539|ENST00000356534	mature-tRNA-Glu-CTC_5_end_1	0	54	59	54	59	2384	6mer	x	6mer	0		0	CHRD	protein_coding
ENSG00000090539	mature-tRNA-Glu-CTC_5_end_2	ENSG00000090539|ENST00000356534	150	-28.62	2	29	33	68	33	0.5455	0.6667	ENSG00000090539|ENST00000356534	mature-tRNA-Glu-CTC_5_end_2	0	54	59	54	59	2386	6mer	x	6mer	0		0	CHRD	protein_coding
ENSG00000090539	mature-tRNA-Glu-CTC_5_end_3	ENSG00000090539|ENST00000356534	150	-33.68	2	29	32	68	33	0.5455	0.6667	ENSG00000090539|ENST00000356534	mature-tRNA-Glu-CTC_5_end_3	0	54	59	54	59	2388	6mer	x	6mer	0		0	CHRD	protein_coding
ENSG00000090539	mature-tRNA-Glu-CTC_5_end_4	ENSG00000090539|ENST00000356534	157	-33.39	2	32	33	68	33	0.5758	0.6667	ENSG00000090539|ENST00000356534	mature-tRNA-Glu-CTC_5_end_4	0	54	59	54	59	2390	6mer	x	6mer	0		0	CHRD	protein_coding
ENSG00000118873	mature-tRNA-Glu-CTC_5_end_1	ENSG00000118873|ENST00000358951	158	-26.04	2	27	2411	2442	26	0.6538	0.7308	ENSG00000118873|ENST00000358951	mature-tRNA-Glu-CTC_5_end_1	0	18	23	18	23	2391	6mer	x	6mer	0		0	RAB3GAP2	protein_coding
ENSG00000197971	mature-tRNA-Glu-TTC_5_end_1	ENSG00000197971|ENST00000359645	154	-27.04	2	32	522	549	31	0.6452	0.6774	ENSG00000197971|ENST00000359645	mature-tRNA-Glu-TTC_5_end_1	0	19	25	19	25	2409	7mer-m8	x	7mer-m8	0		0	MBP	protein_coding
ENSG00000134874	mature-tRNA-Glu-CTC_5_end_1	ENSG00000134874|ENST00000361156	152	-31.5	2	31	3275	3306	29	0.5172	0.6897	ENSG00000134874|ENST00000361156	mature-tRNA-Glu-CTC_5_end_1	0	15	20	15	20	2452	6mer	x	6mer	0		0	DZIP1	protein_coding
ENSG00000070526	mature-tRNA-Glu-CTC_5_end_1	ENSG00000070526|ENST00000359088	174	-33.67	2	32	263	296	33	0.697	0.7273	ENSG00000070526|ENST00000359088	mature-tRNA-Glu-CTC_5_end_1	0	54	60	54	60	2466	7mer-m8	x	7mer-m8	0		0	ST6GALNAC1	protein_coding
ENSG00000162885	mature-tRNA-Gly-CCC_5_end_1	ENSG00000162885|ENST00000366600	151	-24.23	2	22	116	143	20	0.65	0.75	ENSG00000162885|ENST00000366600	mature-tRNA-Gly-CCC_5_end_1	0	43	49	43	49	2483	7mer-1a	x	7mer-1a	0		0	B3GALNT2	protein_coding
ENSG00000162885	mature-tRNA-Gly-GCC_5_end_1	ENSG00000162885|ENST00000366600	155	-24.23	2	30	117	143	28	0.6071	0.7143	ENSG00000162885|ENST00000366600	mature-tRNA-Gly-GCC_5_end_1	0	43	49	43	49	2484	7mer-1a	x	7mer-1a	0		0	B3GALNT2	protein_coding
ENSG00000162885	mature-tRNA-Gly-GCC_5_end_2	ENSG00000162885|ENST00000366600	155	-24.23	2	30	116	143	28	0.6071	0.7143	ENSG00000162885|ENST00000366600	mature-tRNA-Gly-GCC_5_end_2	0	43	49	43	49	2485	7mer-1a	x	7mer-1a	0		0	B3GALNT2	protein_coding
ENSG00000162885	mature-tRNA-Gly-GCC_5_end_3	ENSG00000162885|ENST00000366600	155	-24.23	2	30	115	143	28	0.6071	0.7143	ENSG00000162885|ENST00000366600	mature-tRNA-Gly-GCC_5_end_3	0	43	49	43	49	2486	7mer-1a	x	7mer-1a	0		0	B3GALNT2	protein_coding
ENSG00000162885	mature-tRNA-Gly-GCC_5_end_4	ENSG00000162885|ENST00000366600	157	-24.23	2	33	113	143	32	0.625	0.6875	ENSG00000162885|ENST00000366600	mature-tRNA-Gly-GCC_5_end_4	0	43	49	43	49	2487	7mer-1a	x	7mer-1a	0		0	B3GALNT2	protein_coding
ENSG00000063015	mature-tRNA-Glu-CTC_5_end_1	ENSG00000063015|ENST00000360295	166	-37.13	2	31	372	413	38	0.6053	0.7368	ENSG00000063015|ENST00000360295	mature-tRNA-Glu-CTC_5_end_1	0	41	47	41	47	2538	7mer-1a	x	7mer-1a	0		0	SEZ6	protein_coding
ENSG00000063015	mature-tRNA-Glu-CTC_5_end_2	ENSG00000063015|ENST00000360295	162	-32.19	2	26	378	413	30	0.6333	0.7667	ENSG00000063015|ENST00000360295	mature-tRNA-Glu-CTC_5_end_2	0	41	47	41	47	2539	7mer-1a	x	7mer-1a	0		0	SEZ6	protein_coding
ENSG00000063015	mature-tRNA-Glu-CTC_5_end_3	ENSG00000063015|ENST00000360295	162	-32.3	2	26	377	413	30	0.6333	0.7667	ENSG00000063015|ENST00000360295	mature-tRNA-Glu-CTC_5_end_3	0	41	47	41	47	2540	7mer-1a	x	7mer-1a	0		0	SEZ6	protein_coding
ENSG00000063015	mature-tRNA-Glu-CTC_5_end_4	ENSG00000063015|ENST00000360295	166	-35.72	2	31	372	413	38	0.6053	0.7368	ENSG00000063015|ENST00000360295	mature-tRNA-Glu-CTC_5_end_4	0	41	47	41	47	2541	7mer-1a	x	7mer-1a	0		0	SEZ6	protein_coding
ENSG00000196946	mature-tRNA-Gly-GCC_5_end_5	ENSG00000196946|ENST00000359286	163	-21.3	2	30	2272	2301	29	0.6207	0.7931	ENSG00000196946|ENST00000359286	mature-tRNA-Gly-GCC_5_end_5	0	43	48	43	48	2550	6mer	x	6mer	0		0	ZNF705A	protein_coding
ENSG00000093010	mature-tRNA-Glu-CTC_5_end_1	ENSG00000093010|ENST00000361682	158	-32.71	2	25	464	492	23	0.6957	0.7826	ENSG00000093010|ENST00000361682	mature-tRNA-Glu-CTC_5_end_1	0	24	30	24	30	2578	7mer-m8	x	7mer-m8	0		0	COMT	protein_coding
ENSG00000143858	mature-tRNA-Glu-CTC_5_end_1	ENSG00000143858|ENST00000367267	168	-31.51	2	30	2479	2512	29	0.5517	0.7931	ENSG00000143858|ENST00000367267	mature-tRNA-Glu-CTC_5_end_1	0	41	47	41	47	2680	7mer-1a	x	7mer-1a	0		0	SYT2	protein_coding
ENSG00000143858	mature-tRNA-Glu-CTC_5_end_2	ENSG00000143858|ENST00000367267	159	-28.47	2	29	2482	2512	28	0.5	0.7857	ENSG00000143858|ENST00000367267	mature-tRNA-Glu-CTC_5_end_2	0	41	47	41	47	2681	7mer-1a	x	7mer-1a	0		0	SYT2	protein_coding
ENSG00000143858	mature-tRNA-Glu-CTC_5_end_3	ENSG00000143858|ENST00000367267	164	-28.47	2	30	2481	2512	29	0.5172	0.7931	ENSG00000143858|ENST00000367267	mature-tRNA-Glu-CTC_5_end_3	0	41	47	41	47	2682	7mer-1a	x	7mer-1a	0		0	SYT2	protein_coding
ENSG00000143858	mature-tRNA-Glu-CTC_5_end_4	ENSG00000143858|ENST00000367267	164	-28.74	2	30	2479	2512	29	0.5172	0.7931	ENSG00000143858|ENST00000367267	mature-tRNA-Glu-CTC_5_end_4	0	41	47	41	47	2683	7mer-1a	x	7mer-1a	0		0	SYT2	protein_coding
ENSG00000196821	mature-tRNA-Glu-CTC_5_end_1	ENSG00000196821|ENST00000374026	174	-30.97	2	32	1452	1485	31	0.5484	0.8065	ENSG00000196821|ENST00000374026	mature-tRNA-Glu-CTC_5_end_1	0	55	60	55	60	2685	6mer	x	6mer	0		0	ILRUN	protein_coding
ENSG00000118473	mature-tRNA-Gly-GCC_5_end_5	ENSG00000118473|ENST00000371037	156	-19.29	2	25	5683	5712	23	0.6522	0.7826	ENSG00000118473|ENST00000371037	mature-tRNA-Gly-GCC_5_end_5	0	15	22	15	22	2691	8mer-1a	x	8mer-1a	0		0	SGIP1	protein_coding
ENSG00000157600	mature-tRNA-Glu-TTC_5_end_1	ENSG00000157600|ENST00000372072	166	-29.31	2	32	2742	2771	30	0.6333	0.7333	ENSG00000157600|ENST00000372072	mature-tRNA-Glu-TTC_5_end_1	0	54	60	54	60	2699	7mer-m8	x	7mer-m8	0		0	TMEM164	protein_coding
ENSG00000197122	mature-tRNA-Glu-TTC_5_end_1	ENSG00000197122|ENST00000373578	155	-33.36	2	32	876	913	35	0.6	0.6857	ENSG00000197122|ENST00000373578	mature-tRNA-Glu-TTC_5_end_1	0	22	27	22	27	2704	6mer	x	6mer	0		0	SRC	protein_coding
ENSG00000101216	mature-tRNA-Glu-TTC_5_end_1	ENSG00000101216|ENST00000370077	153	-29.09	2	32	950	980	31	0.5806	0.7097	ENSG00000101216|ENST00000370077	mature-tRNA-Glu-TTC_5_end_1	0	32	37	32	37	2711	6mer	x	6mer	0		0	GMEB2	protein_coding
ENSG00000185920	mature-tRNA-Glu-TTC_5_end_1	ENSG00000185920|ENST00000375290	153	-20.34	2	32	7591	7622	30	0.5	0.7	ENSG00000185920|ENST00000375290	mature-tRNA-Glu-TTC_5_end_1	0	55	60	55	60	2722	6mer	x	6mer	0		0	PTCH1	protein_coding
ENSG00000102021	mature-tRNA-Glu-CTC_5_end_1	ENSG00000102021|ENST00000371921	146	-33.31	2	25	310	352	33	0.5455	0.6667	ENSG00000102021|ENST00000371921	mature-tRNA-Glu-CTC_5_end_1	0	25	31	25	31	2727	7mer-m8	x	7mer-m8	0		0	LUZP4	protein_coding
ENSG00000241935	mature-tRNA-Glu-CTC_5_end_1	ENSG00000241935|ENST00000370646	159	-29.92	2	31	687	719	30	0.5667	0.7333	ENSG00000241935|ENST00000370646	mature-tRNA-Glu-CTC_5_end_1	0	24	30	24	30	2747	7mer-1a	x	7mer-1a	0		0	HOGA1	protein_coding
ENSG00000157600	mature-tRNA-Glu-CTC_5_end_1	ENSG00000157600|ENST00000372073	168	-32.42	2	31	379	410	29	0.5517	0.7931	ENSG00000157600|ENST00000372073	mature-tRNA-Glu-CTC_5_end_1	0	23	28	23	28	2751	6mer	x	6mer	0		0	TMEM164	protein_coding
ENSG00000157600	mature-tRNA-Glu-CTC_5_end_2	ENSG00000157600|ENST00000372073	155	-31.67	2	21	3041	3071	20	0.55	0.9	ENSG00000157600|ENST00000372073	mature-tRNA-Glu-CTC_5_end_2	0	23	28	23	28	2752	6mer	x	6mer	0		0	TMEM164	protein_coding
ENSG00000157600	mature-tRNA-Glu-CTC_5_end_3	ENSG00000157600|ENST00000372073	155	-34.15	2	21	3040	3071	20	0.55	0.9	ENSG00000157600|ENST00000372073	mature-tRNA-Glu-CTC_5_end_3	0	23	28	23	28	2753	6mer	x	6mer	0		0	TMEM164	protein_coding
ENSG00000157600	mature-tRNA-Glu-CTC_5_end_4	ENSG00000157600|ENST00000372073	160	-35.72	2	31	3037	3071	31	0.5161	0.7742	ENSG00000157600|ENST00000372073	mature-tRNA-Glu-CTC_5_end_4	0	23	28	23	28	2754	6mer	x	6mer	0		0	TMEM164	protein_coding
ENSG00000136867	mature-tRNA-Glu-CTC_5_end_1	ENSG00000136867|ENST00000374220	156	-28.18	2	28	576	608	27	0.6296	0.7037	ENSG00000136867|ENST00000374220	mature-tRNA-Glu-CTC_5_end_1	0	54	59	54	59	2763	6mer	x	6mer	0		0	SLC31A2	protein_coding
ENSG00000148848	mature-tRNA-Glu-CTC_5_end_1	ENSG00000148848|ENST00000368676	152	-27.37	2	30	633	668	31	0.4839	0.7097	ENSG00000148848|ENST00000368676	mature-tRNA-Glu-CTC_5_end_1	0	54	59	54	59	2767	6mer	x	6mer	0		0	ADAM12	protein_coding
ENSG00000162814	mature-tRNA-Glu-CTC_5_end_1	ENSG00000162814|ENST00000366933	153	-26.71	2	31	580	609	29	0.5862	0.6897	ENSG00000162814|ENST00000366933	mature-tRNA-Glu-CTC_5_end_1	0	18	23	18	23	2772	6mer	x	6mer	0		0	SPATA17	protein_coding
ENSG00000177628	mature-tRNA-Glu-CTC_5_end_1	ENSG00000177628|ENST00000368373	162	-34.43	2	32	142	176	32	0.5312	0.7188	ENSG00000177628|ENST00000368373	mature-tRNA-Glu-CTC_5_end_1	0	34	39	34	39	2820	6mer	x	6mer	0		0	GBA	protein_coding
ENSG00000148356	mature-tRNA-Glu-TTC_5_end_1	ENSG00000148356|ENST00000373324	153	-33.2	2	31	361	390	31	0.6452	0.7097	ENSG00000148356|ENST00000373324	mature-tRNA-Glu-TTC_5_end_1	0	21	26	21	26	2832	6mer	x	6mer	0		0	LRSAM1	protein_coding
ENSG00000024048	mature-tRNA-Gly-CCC_5_end_1	ENSG00000024048|ENST00000372899	145	-18.93	2	28	1411	1441	28	0.5357	0.6786	ENSG00000024048|ENST00000372899	mature-tRNA-Gly-CCC_5_end_1	0	45	51	45	51	2838	7mer-1a	x	7mer-1a	0		0	UBR2	protein_coding
ENSG00000024048	mature-tRNA-Gly-GCC_5_end_1	ENSG00000024048|ENST00000372899	148	-19.95	2	29	1411	1441	27	0.4815	0.6667	ENSG00000024048|ENST00000372899	mature-tRNA-Gly-GCC_5_end_1	0	45	51	45	51	2839	7mer-1a	x	7mer-1a	0		0	UBR2	protein_coding
ENSG00000024048	mature-tRNA-Gly-GCC_5_end_2	ENSG00000024048|ENST00000372899	148	-21.73	2	29	1410	1441	27	0.4815	0.6667	ENSG00000024048|ENST00000372899	mature-tRNA-Gly-GCC_5_end_2	0	45	51	45	51	2840	7mer-1a	x	7mer-1a	0		0	UBR2	protein_coding
ENSG00000024048	mature-tRNA-Gly-GCC_5_end_3	ENSG00000024048|ENST00000372899	148	-21.93	2	29	1409	1441	27	0.4815	0.6667	ENSG00000024048|ENST00000372899	mature-tRNA-Gly-GCC_5_end_3	0	45	51	45	51	2841	7mer-1a	x	7mer-1a	0		0	UBR2	protein_coding
ENSG00000024048	mature-tRNA-Gly-GCC_5_end_4	ENSG00000024048|ENST00000372899	148	-21.93	2	29	1408	1441	27	0.4815	0.6667	ENSG00000024048|ENST00000372899	mature-tRNA-Gly-GCC_5_end_4	0	45	51	45	51	2842	7mer-1a	x	7mer-1a	0		0	UBR2	protein_coding
ENSG00000057757	mature-tRNA-Glu-CTC_5_end_1	ENSG00000057757|ENST00000374524	148	-31.04	2	15	164	195	13	0.7692	0.9231	ENSG00000057757|ENST00000374524	mature-tRNA-Glu-CTC_5_end_1	0	34	40	34	40	2882	7mer-1a	x	7mer-1a	0		0	PITHD1	protein_coding
ENSG00000204248	mature-tRNA-Gly-GCC_5_end_5	ENSG00000204248|ENST00000374708	156	-13.67	2	22	255	289	23	0.6957	0.6957	ENSG00000204248|ENST00000374708	mature-tRNA-Gly-GCC_5_end_5	0	49	55	49	55	2911	7mer-1a	x	7mer-1a	0		0	COL11A2	protein_coding
ENSG00000106799	mature-tRNA-Glu-TTC_5_end_1	ENSG00000106799|ENST00000374990	172	-37.39	2	32	146	185	37	0.6486	0.7027	ENSG00000106799|ENST00000374990	mature-tRNA-Glu-TTC_5_end_1	0	54	60	54	60	2939	7mer-1a	x	7mer-1a	0		0	TGFBR1	protein_coding
ENSG00000117707	mature-tRNA-Glu-TTC_5_end_1	ENSG00000117707|ENST00000366958	171	-30.7	2	31	3558	3593	33	0.6061	0.7576	ENSG00000117707|ENST00000366958	mature-tRNA-Glu-TTC_5_end_1	0	16	22	16	22	2954	7mer-1a	x	7mer-1a	0		0	PROX1	protein_coding
ENSG00000148408	mature-tRNA-Glu-TTC_5_end_1	ENSG00000148408|ENST00000371372	155	-32.43	2	30	1165	1201	32	0.5312	0.7188	ENSG00000148408|ENST00000371372	mature-tRNA-Glu-TTC_5_end_1	0	46	51	46	51	2967	6mer	x	6mer	0		0	CACNA1B	protein_coding
ENSG00000170734	mature-tRNA-Glu-TTC_5_end_1	ENSG00000170734|ENST00000372236	156	-22.06	2	27	2756	2790	27	0.6296	0.7037	ENSG00000170734|ENST00000372236	mature-tRNA-Glu-TTC_5_end_1	0	27	32	27	32	2987	6mer	x	6mer	0		0	POLH	protein_coding
ENSG00000162543	mature-tRNA-Glu-CTC_5_end_1	ENSG00000162543|ENST00000375099	144	-24.43	2	28	4024	4057	28	0.5	0.7143	ENSG00000162543|ENST00000375099	mature-tRNA-Glu-CTC_5_end_1	0	19	24	19	24	2998	6mer	x	6mer	0		0	UBXN10	protein_coding
ENSG00000119396	mature-tRNA-Glu-TTC_5_end_1	ENSG00000119396|ENST00000373840	152	-27.63	2	25	2916	2945	23	0.6522	0.6957	ENSG00000119396|ENST00000373840	mature-tRNA-Glu-TTC_5_end_1	0	38	43	38	43	3122	6mer	x	6mer	0		0	RAB14	protein_coding
ENSG00000134222	mature-tRNA-Glu-CTC_5_end_1	ENSG00000134222|ENST00000369903	158	-32.02	2	32	97	131	32	0.5625	0.6562	ENSG00000134222|ENST00000369903	mature-tRNA-Glu-CTC_5_end_1	0	17	23	17	23	3130	7mer-m8	x	7mer-m8	0		0	PSRC1	protein_coding
ENSG00000134222	mature-tRNA-Glu-CTC_5_end_2	ENSG00000134222|ENST00000369903	154	-27.57	2	28	100	131	28	0.5714	0.6786	ENSG00000134222|ENST00000369903	mature-tRNA-Glu-CTC_5_end_2	0	17	23	17	23	3131	7mer-m8	x	7mer-m8	0		0	PSRC1	protein_coding
ENSG00000134222	mature-tRNA-Glu-CTC_5_end_3	ENSG00000134222|ENST00000369903	156	-28.44	2	30	99	131	30	0.5667	0.6667	ENSG00000134222|ENST00000369903	mature-tRNA-Glu-CTC_5_end_3	0	17	23	17	23	3132	7mer-m8	x	7mer-m8	0		0	PSRC1	protein_coding
ENSG00000134222	mature-tRNA-Glu-CTC_5_end_4	ENSG00000134222|ENST00000369903	158	-31.22	2	32	97	131	32	0.5625	0.6562	ENSG00000134222|ENST00000369903	mature-tRNA-Glu-CTC_5_end_4	0	17	23	17	23	3133	7mer-m8	x	7mer-m8	0		0	PSRC1	protein_coding
ENSG00000196821	mature-tRNA-Glu-CTC_5_end_1	ENSG00000196821|ENST00000374023	174	-30.97	2	32	1452	1485	31	0.5484	0.8065	ENSG00000196821|ENST00000374023	mature-tRNA-Glu-CTC_5_end_1	0	24	29	24	29	3134	6mer	x	6mer	0		0	ILRUN	protein_coding
ENSG00000102606	mature-tRNA-Glu-CTC_5_end_1	ENSG00000102606|ENST00000375736	168	-35.2	2	32	464	500	34	0.5588	0.7941	ENSG00000102606|ENST00000375736	mature-tRNA-Glu-CTC_5_end_1	0	52	58	52	58	3143	7mer-m8	x	7mer-m8	0		0	ARHGEF7	protein_coding
ENSG00000102606	mature-tRNA-Glu-CTC_5_end_2	ENSG00000102606|ENST00000375736	161	-32.55	2	29	467	500	31	0.5484	0.8065	ENSG00000102606|ENST00000375736	mature-tRNA-Glu-CTC_5_end_2	0	52	58	52	58	3145	7mer-m8	x	7mer-m8	0		0	ARHGEF7	protein_coding
ENSG00000102606	mature-tRNA-Glu-CTC_5_end_3	ENSG00000102606|ENST00000375736	161	-34.96	2	29	466	500	31	0.5484	0.8065	ENSG00000102606|ENST00000375736	mature-tRNA-Glu-CTC_5_end_3	0	52	58	52	58	3147	7mer-m8	x	7mer-m8	0		0	ARHGEF7	protein_coding
ENSG00000102606	mature-tRNA-Glu-CTC_5_end_4	ENSG00000102606|ENST00000375736	166	-35.2	2	32	471	500	30	0.6	0.7667	ENSG00000102606|ENST00000375736	mature-tRNA-Glu-CTC_5_end_4	0	52	58	52	58	3149	7mer-m8	x	7mer-m8	0		0	ARHGEF7	protein_coding
ENSG00000196482	mature-tRNA-Gly-GCC_5_end_5	ENSG00000196482|ENST00000366938	161	-16.41	2	28	961	996	30	0.6667	0.6667	ENSG00000196482|ENST00000366938	mature-tRNA-Gly-GCC_5_end_5	0	40	47	40	47	3151	8mer-1a	x	8mer-1a	0		0	ESRRG	protein_coding
ENSG00000112759	mature-tRNA-Glu-CTC_5_end_1	ENSG00000112759|ENST00000371713	164	-37.28	2	30	36	69	29	0.5862	0.7241	ENSG00000112759|ENST00000371713	mature-tRNA-Glu-CTC_5_end_1	0	49	54	49	54	3153	6mer	x	6mer	0		0	SLC29A1	protein_coding
ENSG00000101452	mature-tRNA-Gly-CCC_5_end_1	ENSG00000101452|ENST00000373325	156	-19.73	2	22	403	432	21	0.619	0.8095	ENSG00000101452|ENST00000373325	mature-tRNA-Gly-CCC_5_end_1	0	43	48	43	48	3179	6mer	x	6mer	0		0	DHX35	protein_coding
ENSG00000101452	mature-tRNA-Gly-GCC_5_end_1	ENSG00000101452|ENST00000373325	156	-20.75	2	22	401	432	21	0.619	0.8095	ENSG00000101452|ENST00000373325	mature-tRNA-Gly-GCC_5_end_1	0	43	48	43	48	3180	6mer	x	6mer	0		0	DHX35	protein_coding
ENSG00000101452	mature-tRNA-Gly-GCC_5_end_2	ENSG00000101452|ENST00000373325	158	-20.75	2	31	402	432	30	0.5333	0.7667	ENSG00000101452|ENST00000373325	mature-tRNA-Gly-GCC_5_end_2	0	43	48	43	48	3181	6mer	x	6mer	0		0	DHX35	protein_coding
ENSG00000101452	mature-tRNA-Gly-GCC_5_end_3	ENSG00000101452|ENST00000373325	158	-21.08	2	31	401	432	30	0.5333	0.7667	ENSG00000101452|ENST00000373325	mature-tRNA-Gly-GCC_5_end_3	0	43	48	43	48	3182	6mer	x	6mer	0		0	DHX35	protein_coding
ENSG00000101452	mature-tRNA-Gly-GCC_5_end_4	ENSG00000101452|ENST00000373325	158	-22.22	2	31	400	432	30	0.5333	0.7667	ENSG00000101452|ENST00000373325	mature-tRNA-Gly-GCC_5_end_4	0	43	48	43	48	3183	6mer	x	6mer	0		0	DHX35	protein_coding
ENSG00000117625	mature-tRNA-Gly-GCC_5_end_5	ENSG00000117625|ENST00000367006	157	-16.98	2	28	858	888	26	0.5769	0.7308	ENSG00000117625|ENST00000367006	mature-tRNA-Gly-GCC_5_end_5	0	32	38	32	38	3188	7mer-1a	x	7mer-1a	0		0	RCOR3	protein_coding
ENSG00000144285	mature-tRNA-Glu-TTC_5_end_1	ENSG00000144285|ENST00000375405	155	-25.31	2	32	1828	1856	31	0.6129	0.7097	ENSG00000144285|ENST00000375405	mature-tRNA-Glu-TTC_5_end_1	0	30	35	30	35	3212	6mer	x	6mer	0		0	SCN1A	protein_coding
ENSG00000143363	mature-tRNA-Glu-CTC_5_end_1	ENSG00000143363|ENST00000368937	159	-29.78	2	30	225	259	30	0.5667	0.7333	ENSG00000143363|ENST00000368937	mature-tRNA-Glu-CTC_5_end_1	0	45	50	45	50	3213	6mer	x	6mer	0		0	PRUNE1	protein_coding
ENSG00000102606	mature-tRNA-Glu-CTC_5_end_1	ENSG00000102606|ENST00000375723	167	-47.42	2	31	1532	1573	38	0.5789	0.7368	ENSG00000102606|ENST00000375723	mature-tRNA-Glu-CTC_5_end_1	0	26	31	26	31	3225	6mer	x	6mer	0		0	ARHGEF7	protein_coding
ENSG00000117748	mature-tRNA-Glu-CTC_5_end_1	ENSG00000117748|ENST00000373912	156	-27.43	2	32	343	370	30	0.6	0.7	ENSG00000117748|ENST00000373912	mature-tRNA-Glu-CTC_5_end_1	0	35	40	35	40	3263	6mer	x	6mer	0		0	RPA2	protein_coding
ENSG00000117748	mature-tRNA-Glu-CTC_5_end_2	ENSG00000117748|ENST00000373912	152	-23.6	2	27	339	370	27	0.6296	0.6667	ENSG00000117748|ENST00000373912	mature-tRNA-Glu-CTC_5_end_2	0	35	40	35	40	3264	6mer	x	6mer	0		0	RPA2	protein_coding
ENSG00000117748	mature-tRNA-Glu-CTC_5_end_3	ENSG00000117748|ENST00000373912	152	-24.59	2	27	338	370	27	0.6296	0.6667	ENSG00000117748|ENST00000373912	mature-tRNA-Glu-CTC_5_end_3	0	35	40	35	40	3265	6mer	x	6mer	0		0	RPA2	protein_coding
ENSG00000117748	mature-tRNA-Glu-CTC_5_end_4	ENSG00000117748|ENST00000373912	157	-24.83	2	32	336	370	32	0.5625	0.6875	ENSG00000117748|ENST00000373912	mature-tRNA-Glu-CTC_5_end_4	0	35	40	35	40	3266	6mer	x	6mer	0		0	RPA2	protein_coding
ENSG00000196586	mature-tRNA-Glu-TTC_5_end_1	ENSG00000196586|ENST00000369985	157	-23.38	2	31	4150	4183	30	0.5	0.7333	ENSG00000196586|ENST00000369985	mature-tRNA-Glu-TTC_5_end_1	0	41	46	41	46	3267	6mer	x	6mer	0		0	MYO6	protein_coding
ENSG00000107816	mature-tRNA-Glu-CTC_5_end_1	ENSG00000107816|ENST00000370223	167	-38.37	2	31	286	316	29	0.6552	0.6897	ENSG00000107816|ENST00000370223	mature-tRNA-Glu-CTC_5_end_1	0	32	37	32	37	3272	6mer	x	6mer	0		0	LZTS2	protein_coding
ENSG00000163485	mature-tRNA-Glu-TTC_5_end_1	ENSG00000163485|ENST00000367236	172	-32.75	2	30	1052	1085	29	0.6552	0.7241	ENSG00000163485|ENST00000367236	mature-tRNA-Glu-TTC_5_end_1	0	29	34	29	34	3282	6mer	x	6mer	0		0	ADORA1	protein_coding
ENSG00000160856	mature-tRNA-Glu-CTC_5_end_1	ENSG00000160856|ENST00000368184	147	-22.33	2	17	273	306	16	0.6875	0.8125	ENSG00000160856|ENST00000368184	mature-tRNA-Glu-CTC_5_end_1	0	30	35	30	35	3294	6mer	x	6mer	0		0	FCRL3	protein_coding
ENSG00000135045	mature-tRNA-Gly-GCC_5_end_5	ENSG00000135045|ENST00000376854	155	-11.48	2	26	1189	1219	24	0.625	0.7083	ENSG00000135045|ENST00000376854	mature-tRNA-Gly-GCC_5_end_5	0	16	21	16	21	3311	6mer	x	6mer	0		0	C9orf40	protein_coding
ENSG00000010278	mature-tRNA-Gly-GCC_5_end_5	ENSG00000010278|ENST00000382515	161	-17.61	2	28	324	361	32	0.5625	0.75	ENSG00000010278|ENST00000382515	mature-tRNA-Gly-GCC_5_end_5	0	24	29	24	29	3349	6mer	x	6mer	0		0	CD9	protein_coding
ENSG00000122694	mature-tRNA-Glu-CTC_5_end_1	ENSG00000122694|ENST00000377960	164	-30.87	2	30	1311	1344	29	0.5862	0.7241	ENSG00000122694|ENST00000377960	mature-tRNA-Glu-CTC_5_end_1	0	24	30	24	30	3354	7mer-1a	x	7mer-1a	0		0	GLIPR2	protein_coding
ENSG00000122694	mature-tRNA-Glu-CTC_5_end_2	ENSG00000122694|ENST00000377960	161	-30.14	2	27	1314	1344	26	0.6154	0.7308	ENSG00000122694|ENST00000377960	mature-tRNA-Glu-CTC_5_end_2	0	24	30	24	30	3355	7mer-1a	x	7mer-1a	0		0	GLIPR2	protein_coding
ENSG00000122694	mature-tRNA-Glu-CTC_5_end_3	ENSG00000122694|ENST00000377960	164	-30.14	2	30	1313	1344	29	0.5862	0.7241	ENSG00000122694|ENST00000377960	mature-tRNA-Glu-CTC_5_end_3	0	24	30	24	30	3356	7mer-1a	x	7mer-1a	0		0	GLIPR2	protein_coding
ENSG00000122694	mature-tRNA-Glu-CTC_5_end_4	ENSG00000122694|ENST00000377960	164	-31.53	2	30	1311	1344	29	0.5862	0.7241	ENSG00000122694|ENST00000377960	mature-tRNA-Glu-CTC_5_end_4	0	24	30	24	30	3357	7mer-1a	x	7mer-1a	0		0	GLIPR2	protein_coding
ENSG00000131697	mature-tRNA-Glu-TTC_5_end_1	ENSG00000131697|ENST00000378156	160	-26.57	2	27	248	279	25	0.6	0.76	ENSG00000131697|ENST00000378156	mature-tRNA-Glu-TTC_5_end_1	0	27	32	27	32	3378	6mer	x	6mer	0		0	NPHP4	protein_coding
ENSG00000129159	mature-tRNA-Glu-CTC_5_end_1	ENSG00000129159|ENST00000379472	172	-38.83	2	32	243	275	31	0.6129	0.7742	ENSG00000129159|ENST00000379472	mature-tRNA-Glu-CTC_5_end_1	0	20	26	20	26	3382	7mer-1a	x	7mer-1a	0		0	KCNC1	protein_coding
ENSG00000129159	mature-tRNA-Glu-CTC_5_end_2	ENSG00000129159|ENST00000379472	149	-22.6	2	16	3809	3837	14	0.7857	0.8571	ENSG00000129159|ENST00000379472	mature-tRNA-Glu-CTC_5_end_2	0	20	26	20	26	3383	7mer-1a	x	7mer-1a	0		0	KCNC1	protein_coding
ENSG00000129159	mature-tRNA-Glu-CTC_5_end_3	ENSG00000129159|ENST00000379472	149	-24.36	2	16	3808	3837	14	0.7857	0.8571	ENSG00000129159|ENST00000379472	mature-tRNA-Glu-CTC_5_end_3	0	20	26	20	26	3384	7mer-1a	x	7mer-1a	0		0	KCNC1	protein_coding
ENSG00000129159	mature-tRNA-Glu-CTC_5_end_4	ENSG00000129159|ENST00000379472	149	-26.47	2	16	3806	3837	14	0.7857	0.8571	ENSG00000129159|ENST00000379472	mature-tRNA-Glu-CTC_5_end_4	0	20	26	20	26	3385	7mer-1a	x	7mer-1a	0		0	KCNC1	protein_coding
ENSG00000004777	mature-tRNA-Glu-TTC_5_end_1	ENSG00000004777|ENST00000378944	154	-33.39	2	32	100	139	38	0.5789	0.6842	ENSG00000004777|ENST00000378944	mature-tRNA-Glu-TTC_5_end_1	0	37	42	37	42	3390	6mer	x	6mer	0		0	ARHGAP33	protein_coding
ENSG00000198040	mature-tRNA-Glu-TTC_5_end_1	ENSG00000198040|ENST00000392319	155	-20.16	2	28	4109	4142	29	0.6207	0.6897	ENSG00000198040|ENST00000392319	mature-tRNA-Glu-TTC_5_end_1	0	54	60	54	60	3395	7mer-1a	x	7mer-1a	0		0	ZNF84	protein_coding
ENSG00000092820	mature-tRNA-Glu-CTC_5_end_1	ENSG00000092820|ENST00000392177	160	-32.22	2	26	131	160	24	0.625	0.8333	ENSG00000092820|ENST00000392177	mature-tRNA-Glu-CTC_5_end_1	0	49	54	49	54	3422	6mer	x	6mer	0		0	EZR	protein_coding
ENSG00000092820	mature-tRNA-Glu-CTC_5_end_2	ENSG00000092820|ENST00000392177	156	-29.18	2	26	134	160	24	0.5833	0.8333	ENSG00000092820|ENST00000392177	mature-tRNA-Glu-CTC_5_end_2	0	49	54	49	54	3423	6mer	x	6mer	0		0	EZR	protein_coding
ENSG00000092820	mature-tRNA-Glu-CTC_5_end_3	ENSG00000092820|ENST00000392177	156	-29.18	2	26	133	160	24	0.5833	0.8333	ENSG00000092820|ENST00000392177	mature-tRNA-Glu-CTC_5_end_3	0	49	54	49	54	3424	6mer	x	6mer	0		0	EZR	protein_coding
ENSG00000092820	mature-tRNA-Glu-CTC_5_end_4	ENSG00000092820|ENST00000392177	156	-29.51	2	26	131	160	24	0.5833	0.8333	ENSG00000092820|ENST00000392177	mature-tRNA-Glu-CTC_5_end_4	0	49	54	49	54	3425	6mer	x	6mer	0		0	EZR	protein_coding
ENSG00000102572	mature-tRNA-Val-AAC_5_end_1	ENSG00000102572|ENST00000376547	146	-19.91	2	11	442	459	9	0.8889	1	ENSG00000102572|ENST00000376547	mature-tRNA-Val-AAC_5_end_1	0	55	60	55	60	3432	6mer	x	6mer	0		0	STK24	protein_coding
ENSG00000102572	mature-tRNA-Val-CAC_5_end_1	ENSG00000102572|ENST00000376547	158	-21.99	2	23	427	459	21	0.619	0.7619	ENSG00000102572|ENST00000376547	mature-tRNA-Val-CAC_5_end_1	0	55	60	55	60	3433	6mer	x	6mer	0		0	STK24	protein_coding
ENSG00000186687	mature-tRNA-Gly-GCC_5_end_5	ENSG00000186687|ENST00000379380	152	-15.01	2	31	5204	5237	31	0.5161	0.7097	ENSG00000186687|ENST00000379380	mature-tRNA-Gly-GCC_5_end_5	0	30	35	30	35	3488	6mer	x	6mer	0		0	LYRM7	protein_coding
ENSG00000240682	mature-tRNA-Glu-TTC_5_end_1	ENSG00000240682|ENST00000393295	155	-31.47	2	32	2469	2501	30	0.5333	0.6333	ENSG00000240682|ENST00000393295	mature-tRNA-Glu-TTC_5_end_1	0	28	33	28	33	3527	6mer	x	6mer	0		0	ISY1	protein_coding
ENSG00000174373	mature-tRNA-Gly-GCC_5_end_5	ENSG00000174373|ENST00000389698	159	-11.55	2	30	546	576	28	0.5714	0.7143	ENSG00000174373|ENST00000389698	mature-tRNA-Gly-GCC_5_end_5	0	47	54	47	54	3560	8mer-1a	x	8mer-1a	0		0	RALGAPA1	protein_coding
ENSG00000174672	mature-tRNA-Glu-CTC_5_end_1	ENSG00000174672|ENST00000382179	146	-32.24	2	29	891	930	34	0.5	0.6765	ENSG00000174672|ENST00000382179	mature-tRNA-Glu-CTC_5_end_1	0	25	30	25	30	3561	6mer	x	6mer	0		0	BRSK2	protein_coding
ENSG00000162493	mature-tRNA-Glu-CTC_5_end_1	ENSG00000162493|ENST00000376057	149	-29.85	2	24	757	788	22	0.5455	0.7727	ENSG00000162493|ENST00000376057	mature-tRNA-Glu-CTC_5_end_1	0	40	45	40	45	3606	6mer	x	6mer	0		0	PDPN	protein_coding
ENSG00000134030	mature-tRNA-Glu-CTC_5_end_1	ENSG00000134030|ENST00000382998	142	-19.33	2	11	1	10	9	0.8889	0.8889	ENSG00000134030|ENST00000382998	mature-tRNA-Glu-CTC_5_end_1	0	19	25	19	25	3610	7mer-m8	x	7mer-m8	0		0	CTIF	protein_coding
ENSG00000126767	mature-tRNA-Glu-CTC_5_end_1	ENSG00000126767|ENST00000376983	159	-32.3	2	25	615	648	24	0.625	0.75	ENSG00000126767|ENST00000376983	mature-tRNA-Glu-CTC_5_end_1	0	47	52	47	52	3650	6mer	x	6mer	0		0	ELK1	protein_coding
ENSG00000197063	mature-tRNA-Glu-CTC_5_end_1	ENSG00000197063|ENST00000392366	166	-32.55	2	32	226	261	33	0.5758	0.697	ENSG00000197063|ENST00000392366	mature-tRNA-Glu-CTC_5_end_1	0	47	52	47	52	3667	6mer	x	6mer	0		0	MAFG	protein_coding
ENSG00000197063	mature-tRNA-Glu-CTC_5_end_2	ENSG00000197063|ENST00000392366	163	-30.15	2	24	232	261	22	0.6818	0.7273	ENSG00000197063|ENST00000392366	mature-tRNA-Glu-CTC_5_end_2	0	47	52	47	52	3668	6mer	x	6mer	0		0	MAFG	protein_coding
ENSG00000197063	mature-tRNA-Glu-CTC_5_end_3	ENSG00000197063|ENST00000392366	163	-30.82	2	24	231	261	22	0.6818	0.7273	ENSG00000197063|ENST00000392366	mature-tRNA-Glu-CTC_5_end_3	0	47	52	47	52	3669	6mer	x	6mer	0		0	MAFG	protein_coding
ENSG00000197063	mature-tRNA-Glu-CTC_5_end_4	ENSG00000197063|ENST00000392366	166	-32.55	2	32	226	261	33	0.5758	0.697	ENSG00000197063|ENST00000392366	mature-tRNA-Glu-CTC_5_end_4	0	47	52	47	52	3670	6mer	x	6mer	0		0	MAFG	protein_coding
ENSG00000111262	mature-tRNA-Gly-GCC_5_end_5	ENSG00000111262|ENST00000382545	157	-16.13	2	24	819	849	22	0.6364	0.7727	ENSG00000111262|ENST00000382545	mature-tRNA-Gly-GCC_5_end_5	0	22	27	22	27	3716	6mer	x	6mer	0		0	KCNA1	protein_coding
ENSG00000204695	mature-tRNA-Gly-GCC_5_end_5	ENSG00000204695|ENST00000377160	152	-17.1	2	14	1	16	14	0.8571	0.8571	ENSG00000204695|ENST00000377160	mature-tRNA-Gly-GCC_5_end_5	0	15	20	15	20	3726	6mer	x	6mer	0		0	OR14J1	protein_coding
ENSG00000101224	mature-tRNA-Glu-CTC_5_end_1	ENSG00000101224|ENST00000379598	150	-29.84	2	24	420	453	23	0.6087	0.6957	ENSG00000101224|ENST00000379598	mature-tRNA-Glu-CTC_5_end_1	0	46	52	46	52	3738	7mer-m8	x	7mer-m8	0		0	CDC25B	protein_coding
ENSG00000112851	mature-tRNA-Glu-TTC_5_end_1	ENSG00000112851|ENST00000380943	150	-20.02	2	25	419	455	27	0.5926	0.7037	ENSG00000112851|ENST00000380943	mature-tRNA-Glu-TTC_5_end_1	0	30	36	30	36	3784	7mer-1a	x	7mer-1a	0		0	ERBIN	protein_coding
ENSG00000138092	mature-tRNA-Glu-CTC_5_end_1	ENSG00000138092|ENST00000380834	160	-29.08	2	32	1289	1318	31	0.5806	0.7742	ENSG00000138092|ENST00000380834	mature-tRNA-Glu-CTC_5_end_1	0	18	23	18	23	3786	6mer	x	6mer	0		0	CENPO	protein_coding
ENSG00000138092	mature-tRNA-Glu-CTC_5_end_2	ENSG00000138092|ENST00000380834	152	-24.69	2	28	2751	2784	31	0.5806	0.6774	ENSG00000138092|ENST00000380834	mature-tRNA-Glu-CTC_5_end_2	0	18	23	18	23	3787	6mer	x	6mer	0		0	CENPO	protein_coding
ENSG00000138092	mature-tRNA-Glu-CTC_5_end_3	ENSG00000138092|ENST00000380834	152	-26.89	2	28	2750	2784	31	0.5806	0.6774	ENSG00000138092|ENST00000380834	mature-tRNA-Glu-CTC_5_end_3	0	18	23	18	23	3788	6mer	x	6mer	0		0	CENPO	protein_coding
ENSG00000138092	mature-tRNA-Glu-CTC_5_end_4	ENSG00000138092|ENST00000380834	152	-27.13	2	28	2748	2784	31	0.5806	0.6774	ENSG00000138092|ENST00000380834	mature-tRNA-Glu-CTC_5_end_4	0	18	23	18	23	3789	6mer	x	6mer	0		0	CENPO	protein_coding
ENSG00000160882	mature-tRNA-Glu-CTC_5_end_1	ENSG00000160882|ENST00000377675	166	-34.56	2	28	128	162	30	0.7	0.7333	ENSG00000160882|ENST00000377675	mature-tRNA-Glu-CTC_5_end_1	0	48	53	48	53	3790	6mer	x	6mer	0		0	CYP11B1	protein_coding
ENSG00000160882	mature-tRNA-Glu-CTC_5_end_2	ENSG00000160882|ENST00000377675	162	-32.58	2	28	131	162	30	0.6667	0.7333	ENSG00000160882|ENST00000377675	mature-tRNA-Glu-CTC_5_end_2	0	48	53	48	53	3791	6mer	x	6mer	0		0	CYP11B1	protein_coding
ENSG00000160882	mature-tRNA-Glu-CTC_5_end_3	ENSG00000160882|ENST00000377675	162	-32.59	2	28	130	162	30	0.6667	0.7333	ENSG00000160882|ENST00000377675	mature-tRNA-Glu-CTC_5_end_3	0	48	53	48	53	3792	6mer	x	6mer	0		0	CYP11B1	protein_coding
ENSG00000160882	mature-tRNA-Glu-CTC_5_end_4	ENSG00000160882|ENST00000377675	162	-32.86	2	28	128	162	30	0.6667	0.7333	ENSG00000160882|ENST00000377675	mature-tRNA-Glu-CTC_5_end_4	0	48	53	48	53	3793	6mer	x	6mer	0		0	CYP11B1	protein_coding
ENSG00000139597	mature-tRNA-Gly-GCC_5_end_5	ENSG00000139597|ENST00000380139	162	-23.37	2	29	129	159	27	0.5556	0.7778	ENSG00000139597|ENST00000380139	mature-tRNA-Gly-GCC_5_end_5	0	27	32	27	32	3811	6mer	x	6mer	0		0	N4BP2L1	protein_coding
ENSG00000125885	mature-tRNA-Glu-CTC_5_end_1	ENSG00000125885|ENST00000378886	150	-26.26	2	21	271	302	19	0.6316	0.7895	ENSG00000125885|ENST00000378886	mature-tRNA-Glu-CTC_5_end_1	0	24	29	24	29	3895	6mer	x	6mer	0		0	MCM8	protein_coding
ENSG00000119487	mature-tRNA-Glu-CTC_5_end_1	ENSG00000119487|ENST00000394063	168	-38.52	2	32	1096	1128	31	0.6129	0.7419	ENSG00000119487|ENST00000394063	mature-tRNA-Glu-CTC_5_end_1	0	48	54	48	54	3958	7mer-m8	x	7mer-m8	0		0	MAPKAP1	protein_coding
ENSG00000175215	mature-tRNA-Glu-CTC_5_end_1	ENSG00000175215|ENST00000398073	160	-32.2	2	32	2377	2413	34	0.6176	0.6765	ENSG00000175215|ENST00000398073	mature-tRNA-Glu-CTC_5_end_1	0	26	31	26	31	3985	6mer	x	6mer	0		0	CTDSP2	protein_coding
ENSG00000242852	mature-tRNA-Gly-GCC_5_end_5	ENSG00000242852|ENST00000397732	162	-18.84	2	28	792	823	28	0.6786	0.75	ENSG00000242852|ENST00000397732	mature-tRNA-Gly-GCC_5_end_5	0	34	39	34	39	4024	6mer	x	6mer	0		0	ZNF709	protein_coding
ENSG00000087274	mature-tRNA-Glu-TTC_5_end_1	ENSG00000087274|ENST00000398125	153	-33.15	2	31	1470	1506	34	0.5882	0.7059	ENSG00000087274|ENST00000398125	mature-tRNA-Glu-TTC_5_end_1	0	31	36	31	36	4025	6mer	x	6mer	0		0	ADD1	protein_coding
ENSG00000151067	mature-tRNA-Glu-TTC_5_end_1	ENSG00000151067|ENST00000399641	166	-31.58	2	26	4158	4188	24	0.6667	0.7917	ENSG00000151067|ENST00000399641	mature-tRNA-Glu-TTC_5_end_1	0	28	33	28	33	4054	6mer	x	6mer	0		0	CACNA1C	protein_coding
ENSG00000095015	mature-tRNA-Glu-CTC_5_end_1	ENSG00000095015|ENST00000399503	158	-25.76	2	31	527	559	29	0.4828	0.7241	ENSG00000095015|ENST00000399503	mature-tRNA-Glu-CTC_5_end_1	0	17	22	17	22	4062	6mer	x	6mer	0		0	MAP3K1	protein_coding
ENSG00000095015	mature-tRNA-Glu-CTC_5_end_2	ENSG00000095015|ENST00000399503	160	-23.69	2	29	530	559	27	0.5185	0.7407	ENSG00000095015|ENST00000399503	mature-tRNA-Glu-CTC_5_end_2	0	17	22	17	22	4063	6mer	x	6mer	0		0	MAP3K1	protein_coding
ENSG00000095015	mature-tRNA-Glu-CTC_5_end_3	ENSG00000095015|ENST00000399503	161	-25.1	2	30	529	559	28	0.5	0.75	ENSG00000095015|ENST00000399503	mature-tRNA-Glu-CTC_5_end_3	0	17	22	17	22	4064	6mer	x	6mer	0		0	MAP3K1	protein_coding
ENSG00000095015	mature-tRNA-Glu-CTC_5_end_4	ENSG00000095015|ENST00000399503	166	-25.76	2	31	527	559	29	0.5172	0.7586	ENSG00000095015|ENST00000399503	mature-tRNA-Glu-CTC_5_end_4	0	17	22	17	22	4065	6mer	x	6mer	0		0	MAP3K1	protein_coding
ENSG00000100167	mature-tRNA-Gly-GCC_5_end_5	ENSG00000100167|ENST00000396425	168	-22.21	2	31	580	608	29	0.6897	0.7586	ENSG00000100167|ENST00000396425	mature-tRNA-Gly-GCC_5_end_5	0	52	57	52	57	4083	6mer	x	6mer	0		0	SEPTIN3	protein_coding
ENSG00000136842	mature-tRNA-Gly-CCC_5_end_1	ENSG00000136842|ENST00000395211	149	-14.33	2	28	609	636	26	0.5769	0.6538	ENSG00000136842|ENST00000395211	mature-tRNA-Gly-CCC_5_end_1	0	22	27	22	27	4084	6mer	x	6mer	0		0	TMOD1	protein_coding
ENSG00000136842	mature-tRNA-Gly-GCC_5_end_1	ENSG00000136842|ENST00000395211	149	-15.93	2	28	607	636	26	0.5769	0.6538	ENSG00000136842|ENST00000395211	mature-tRNA-Gly-GCC_5_end_1	0	22	27	22	27	4085	6mer	x	6mer	0		0	TMOD1	protein_coding
ENSG00000136842	mature-tRNA-Gly-GCC_5_end_2	ENSG00000136842|ENST00000395211	151	-15.93	2	31	607	636	29	0.5862	0.6207	ENSG00000136842|ENST00000395211	mature-tRNA-Gly-GCC_5_end_2	0	22	27	22	27	4086	6mer	x	6mer	0		0	TMOD1	protein_coding
ENSG00000136842	mature-tRNA-Gly-GCC_5_end_3	ENSG00000136842|ENST00000395211	151	-16.4	2	31	606	636	29	0.5862	0.6207	ENSG00000136842|ENST00000395211	mature-tRNA-Gly-GCC_5_end_3	0	22	27	22	27	4087	6mer	x	6mer	0		0	TMOD1	protein_coding
ENSG00000136842	mature-tRNA-Gly-GCC_5_end_4	ENSG00000136842|ENST00000395211	153	-17.79	2	33	605	636	31	0.5806	0.6129	ENSG00000136842|ENST00000395211	mature-tRNA-Gly-GCC_5_end_4	0	22	27	22	27	4088	6mer	x	6mer	0		0	TMOD1	protein_coding
ENSG00000156284	mature-tRNA-Glu-TTC_5_end_1	ENSG00000156284|ENST00000399899	165	-27.83	2	28	978	1008	27	0.7037	0.7778	ENSG00000156284|ENST00000399899	mature-tRNA-Glu-TTC_5_end_1	0	49	54	49	54	4100	6mer	x	6mer	0		0	CLDN8	protein_coding
ENSG00000168256	mature-tRNA-Glu-CTC_5_end_1	ENSG00000168256|ENST00000393881	155	-30.17	2	31	84	111	29	0.6207	0.6897	ENSG00000168256|ENST00000393881	mature-tRNA-Glu-CTC_5_end_1	0	49	55	49	55	4113	7mer-1a	x	7mer-1a	0		0	NKIRAS2	protein_coding
ENSG00000182606	mature-tRNA-Glu-CTC_5_end_1	ENSG00000182606|ENST00000396175	174	-38.85	2	32	1074	1107	31	0.6129	0.7419	ENSG00000182606|ENST00000396175	mature-tRNA-Glu-CTC_5_end_1	0	40	46	40	46	4131	7mer-1a	x	7mer-1a	0		0	TRAK1	protein_coding
ENSG00000087111	mature-tRNA-Glu-CTC_5_end_1	ENSG00000087111|ENST00000395346	176	-35.57	2	31	187	215	29	0.7241	0.7586	ENSG00000087111|ENST00000395346	mature-tRNA-Glu-CTC_5_end_1	0	36	41	36	41	4136	6mer	x	6mer	0		0	PIGS	protein_coding
ENSG00000087111	mature-tRNA-Glu-CTC_5_end_2	ENSG00000087111|ENST00000395346	168	-34.23	2	27	190	215	25	0.76	0.76	ENSG00000087111|ENST00000395346	mature-tRNA-Glu-CTC_5_end_2	0	36	41	36	41	4137	6mer	x	6mer	0		0	PIGS	protein_coding
ENSG00000087111	mature-tRNA-Glu-CTC_5_end_3	ENSG00000087111|ENST00000395346	171	-35.81	2	30	189	215	28	0.7143	0.75	ENSG00000087111|ENST00000395346	mature-tRNA-Glu-CTC_5_end_3	0	36	41	36	41	4138	6mer	x	6mer	0		0	PIGS	protein_coding
ENSG00000087111	mature-tRNA-Glu-CTC_5_end_4	ENSG00000087111|ENST00000395346	176	-35.81	2	31	187	215	29	0.7241	0.7586	ENSG00000087111|ENST00000395346	mature-tRNA-Glu-CTC_5_end_4	0	36	41	36	41	4139	6mer	x	6mer	0		0	PIGS	protein_coding
ENSG00000196639	mature-tRNA-Glu-CTC_5_end_1	ENSG00000196639|ENST00000397056	147	-27.11	2	25	3011	3046	26	0.5769	0.6538	ENSG00000196639|ENST00000397056	mature-tRNA-Glu-CTC_5_end_1	0	46	51	46	51	4155	6mer	x	6mer	0		0	HRH1	protein_coding
ENSG00000090857	mature-tRNA-Glu-CTC_5_end_1	ENSG00000090857|ENST00000398122	155	-25.21	2	12	1	12	10	1	1	ENSG00000090857|ENST00000398122	mature-tRNA-Glu-CTC_5_end_1	0	16	21	16	21	4159	6mer	x	6mer	0		0	PDPR	protein_coding
ENSG00000090857	mature-tRNA-Glu-CTC_5_end_2	ENSG00000090857|ENST00000398122	151	-22.36	2	12	1	12	10	0.9	1	ENSG00000090857|ENST00000398122	mature-tRNA-Glu-CTC_5_end_2	0	16	21	16	21	4160	6mer	x	6mer	0		0	PDPR	protein_coding
ENSG00000090857	mature-tRNA-Glu-CTC_5_end_3	ENSG00000090857|ENST00000398122	151	-22.36	2	12	1	12	10	0.9	1	ENSG00000090857|ENST00000398122	mature-tRNA-Glu-CTC_5_end_3	0	16	21	16	21	4161	6mer	x	6mer	0		0	PDPR	protein_coding
ENSG00000090857	mature-tRNA-Glu-CTC_5_end_4	ENSG00000090857|ENST00000398122	151	-23.61	2	12	1	12	10	0.9	1	ENSG00000090857|ENST00000398122	mature-tRNA-Glu-CTC_5_end_4	0	16	21	16	21	4162	6mer	x	6mer	0		0	PDPR	protein_coding
ENSG00000100483	mature-tRNA-Gly-GCC_5_end_5	ENSG00000100483|ENST00000395860	176	-19.92	2	31	828	858	29	0.6207	0.7931	ENSG00000100483|ENST00000395860	mature-tRNA-Gly-GCC_5_end_5	0	53	59	53	59	4174	7mer-1a	x	7mer-1a	0		0	VCPKMT	protein_coding
ENSG00000106070	mature-tRNA-Gly-GCC_5_end_5	ENSG00000106070|ENST00000398812	155	-18.82	2	24	1705	1736	22	0.5909	0.7273	ENSG00000106070|ENST00000398812	mature-tRNA-Gly-GCC_5_end_5	0	19	25	19	25	4218	7mer-m8	x	7mer-m8	0		0	GRB10	protein_coding
ENSG00000104320	mature-tRNA-Gly-GCC_5_end_5	ENSG00000104320|ENST00000396252	151	-16.34	2	30	1648	1675	28	0.5714	0.7143	ENSG00000104320|ENST00000396252	mature-tRNA-Gly-GCC_5_end_5	0	20	26	20	26	4247	7mer-m8	x	7mer-m8	0		0	NBN	protein_coding
ENSG00000215218	mature-tRNA-Glu-CTC_5_end_1	ENSG00000215218|ENST00000399816	161	-27.76	2	27	3002	3034	27	0.7037	0.7407	ENSG00000215218|ENST00000399816	mature-tRNA-Glu-CTC_5_end_1	0	18	24	18	24	4292	7mer-1a	x	7mer-1a	0		0	UBE2QL1	protein_coding
ENSG00000215218	mature-tRNA-Glu-CTC_5_end_2	ENSG00000215218|ENST00000399816	169	-30.8	2	27	3005	3034	27	0.7407	0.7778	ENSG00000215218|ENST00000399816	mature-tRNA-Glu-CTC_5_end_2	0	18	24	18	24	4293	7mer-1a	x	7mer-1a	0		0	UBE2QL1	protein_coding
ENSG00000215218	mature-tRNA-Glu-CTC_5_end_3	ENSG00000215218|ENST00000399816	169	-30.8	2	27	3004	3034	27	0.7407	0.7778	ENSG00000215218|ENST00000399816	mature-tRNA-Glu-CTC_5_end_3	0	18	24	18	24	4294	7mer-1a	x	7mer-1a	0		0	UBE2QL1	protein_coding
ENSG00000215218	mature-tRNA-Glu-CTC_5_end_4	ENSG00000215218|ENST00000399816	169	-30.8	2	27	3002	3034	27	0.7407	0.7778	ENSG00000215218|ENST00000399816	mature-tRNA-Glu-CTC_5_end_4	0	18	24	18	24	4295	7mer-1a	x	7mer-1a	0		0	UBE2QL1	protein_coding
ENSG00000167772	mature-tRNA-Glu-CTC_5_end_1	ENSG00000167772|ENST00000393962	173	-30.43	2	31	237	270	30	0.6	0.7667	ENSG00000167772|ENST00000393962	mature-tRNA-Glu-CTC_5_end_1	0	32	38	32	38	4321	7mer-m8	x	7mer-m8	0		0	ANGPTL4	protein_coding
ENSG00000167772	mature-tRNA-Glu-CTC_5_end_2	ENSG00000167772|ENST00000393962	153	-27.77	2	27	324	355	27	0.5556	0.7037	ENSG00000167772|ENST00000393962	mature-tRNA-Glu-CTC_5_end_2	0	32	38	32	38	4322	7mer-m8	x	7mer-m8	0		0	ANGPTL4	protein_coding
ENSG00000167772	mature-tRNA-Glu-CTC_5_end_3	ENSG00000167772|ENST00000393962	156	-27.77	2	30	323	355	30	0.5333	0.7	ENSG00000167772|ENST00000393962	mature-tRNA-Glu-CTC_5_end_3	0	32	38	32	38	4323	7mer-m8	x	7mer-m8	0		0	ANGPTL4	protein_coding
ENSG00000167772	mature-tRNA-Glu-CTC_5_end_4	ENSG00000167772|ENST00000393962	156	-29.05	2	30	321	355	30	0.5333	0.7	ENSG00000167772|ENST00000393962	mature-tRNA-Glu-CTC_5_end_4	0	32	38	32	38	4324	7mer-m8	x	7mer-m8	0		0	ANGPTL4	protein_coding
ENSG00000168256	mature-tRNA-Glu-CTC_5_end_1	ENSG00000168256|ENST00000393885	164	-44.31	2	31	1165	1201	33	0.5758	0.7273	ENSG00000168256|ENST00000393885	mature-tRNA-Glu-CTC_5_end_1	0	28	33	28	33	4345	6mer	x	6mer	0		0	NKIRAS2	protein_coding
ENSG00000168256	mature-tRNA-Glu-CTC_5_end_2	ENSG00000168256|ENST00000393885	161	-37.93	2	28	1169	1201	29	0.6207	0.7241	ENSG00000168256|ENST00000393885	mature-tRNA-Glu-CTC_5_end_2	0	28	33	28	33	4346	6mer	x	6mer	0		0	NKIRAS2	protein_coding
ENSG00000168256	mature-tRNA-Glu-CTC_5_end_3	ENSG00000168256|ENST00000393885	161	-40.41	2	28	1168	1201	29	0.6207	0.7241	ENSG00000168256|ENST00000393885	mature-tRNA-Glu-CTC_5_end_3	0	28	33	28	33	4347	6mer	x	6mer	0		0	NKIRAS2	protein_coding
ENSG00000168256	mature-tRNA-Glu-CTC_5_end_4	ENSG00000168256|ENST00000393885	164	-43.07	2	31	1165	1201	33	0.5758	0.7273	ENSG00000168256|ENST00000393885	mature-tRNA-Glu-CTC_5_end_4	0	28	33	28	33	4348	6mer	x	6mer	0		0	NKIRAS2	protein_coding
ENSG00000134115	mature-tRNA-Glu-CTC_5_end_1	ENSG00000134115|ENST00000397479	154	-31.74	2	28	917	952	29	0.5517	0.6897	ENSG00000134115|ENST00000397479	mature-tRNA-Glu-CTC_5_end_1	0	21	26	21	26	4361	6mer	x	6mer	0		0	CNTN6	protein_coding
ENSG00000100280	mature-tRNA-Glu-TTC_5_end_1	ENSG00000100280|ENST00000405198	160	-32.64	2	32	204	241	35	0.5429	0.7429	ENSG00000100280|ENST00000405198	mature-tRNA-Glu-TTC_5_end_1	0	24	31	24	31	4442	8mer-1a	x	8mer-1a	0		0	AP1B1	protein_coding
ENSG00000151116	mature-tRNA-Gly-CCC_5_end_1	ENSG00000151116|ENST00000396196	156	-16.92	2	24	922	948	22	0.6364	0.7727	ENSG00000151116|ENST00000396196	mature-tRNA-Gly-CCC_5_end_1	0	48	55	48	55	4462	8mer-1a	x	8mer-1a	0		0	UEVLD	protein_coding
ENSG00000151116	mature-tRNA-Gly-GCC_5_end_1	ENSG00000151116|ENST00000396196	156	-17.73	2	24	921	948	22	0.6364	0.7727	ENSG00000151116|ENST00000396196	mature-tRNA-Gly-GCC_5_end_1	0	48	55	48	55	4463	8mer-1a	x	8mer-1a	0		0	UEVLD	protein_coding
ENSG00000151116	mature-tRNA-Gly-GCC_5_end_2	ENSG00000151116|ENST00000396196	156	-17.73	2	24	919	948	22	0.6364	0.7727	ENSG00000151116|ENST00000396196	mature-tRNA-Gly-GCC_5_end_2	0	48	55	48	55	4464	8mer-1a	x	8mer-1a	0		0	UEVLD	protein_coding
ENSG00000151116	mature-tRNA-Gly-GCC_5_end_3	ENSG00000151116|ENST00000396196	156	-17.73	2	24	918	948	22	0.6364	0.7727	ENSG00000151116|ENST00000396196	mature-tRNA-Gly-GCC_5_end_3	0	48	55	48	55	4465	8mer-1a	x	8mer-1a	0		0	UEVLD	protein_coding
ENSG00000151116	mature-tRNA-Gly-GCC_5_end_4	ENSG00000151116|ENST00000396196	157	-17.73	2	33	917	948	31	0.5484	0.6774	ENSG00000151116|ENST00000396196	mature-tRNA-Gly-GCC_5_end_4	0	48	55	48	55	4466	8mer-1a	x	8mer-1a	0		0	UEVLD	protein_coding
ENSG00000101938	mature-tRNA-Glu-TTC_5_end_1	ENSG00000101938|ENST00000394797	159	-29.31	2	32	194	223	32	0.5938	0.75	ENSG00000101938|ENST00000394797	mature-tRNA-Glu-TTC_5_end_1	0	48	55	48	55	4524	8mer-1a	x	8mer-1a	0		0	CHRDL1	protein_coding
ENSG00000132535	mature-tRNA-Glu-CTC_5_end_1	ENSG00000132535|ENST00000399506	173	-35.43	2	30	2519	2549	28	0.6786	0.7857	ENSG00000132535|ENST00000399506	mature-tRNA-Glu-CTC_5_end_1	0	34	40	34	40	4525	7mer-m8	x	7mer-m8	0		0	DLG4	protein_coding
ENSG00000132535	mature-tRNA-Glu-CTC_5_end_2	ENSG00000132535|ENST00000399506	167	-32.56	2	28	2522	2549	26	0.6538	0.8077	ENSG00000132535|ENST00000399506	mature-tRNA-Glu-CTC_5_end_2	0	34	40	34	40	4526	7mer-m8	x	7mer-m8	0		0	DLG4	protein_coding
ENSG00000132535	mature-tRNA-Glu-CTC_5_end_3	ENSG00000132535|ENST00000399506	169	-33.41	2	30	2521	2549	28	0.6429	0.7857	ENSG00000132535|ENST00000399506	mature-tRNA-Glu-CTC_5_end_3	0	34	40	34	40	4527	7mer-m8	x	7mer-m8	0		0	DLG4	protein_coding
ENSG00000132535	mature-tRNA-Glu-CTC_5_end_4	ENSG00000132535|ENST00000399506	169	-33.54	2	30	2519	2549	28	0.6429	0.7857	ENSG00000132535|ENST00000399506	mature-tRNA-Glu-CTC_5_end_4	0	34	40	34	40	4528	7mer-m8	x	7mer-m8	0		0	DLG4	protein_coding
ENSG00000196247	mature-tRNA-Gly-GCC_5_end_5	ENSG00000196247|ENST00000395391	178	-26.09	2	29	24	59	31	0.6774	0.7742	ENSG00000196247|ENST00000395391	mature-tRNA-Gly-GCC_5_end_5	0	40	45	40	45	4533	6mer	x	6mer	0		0	ZNF107	protein_coding
ENSG00000076984	mature-tRNA-Glu-TTC_5_end_1	ENSG00000076984|ENST00000397983	153	-29.13	2	32	1015	1050	33	0.5152	0.697	ENSG00000076984|ENST00000397983	mature-tRNA-Glu-TTC_5_end_1	0	25	31	25	31	4540	7mer-m8	x	7mer-m8	0		0	MAP2K7	protein_coding
ENSG00000144524	mature-tRNA-Gly-CCC_5_end_1	ENSG00000144524|ENST00000410017	154	-25.35	2	24	219	250	25	0.6	0.72	ENSG00000144524|ENST00000410017	mature-tRNA-Gly-CCC_5_end_1	0	55	60	55	60	4546	6mer	x	6mer	0		0	COPS7B	protein_coding
ENSG00000144524	mature-tRNA-Gly-GCC_5_end_1	ENSG00000144524|ENST00000410017	154	-28.15	2	24	217	250	25	0.6	0.72	ENSG00000144524|ENST00000410017	mature-tRNA-Gly-GCC_5_end_1	0	55	60	55	60	4547	6mer	x	6mer	0		0	COPS7B	protein_coding
ENSG00000144524	mature-tRNA-Gly-GCC_5_end_2	ENSG00000144524|ENST00000410017	154	-29.11	2	24	216	250	25	0.6	0.72	ENSG00000144524|ENST00000410017	mature-tRNA-Gly-GCC_5_end_2	0	55	60	55	60	4548	6mer	x	6mer	0		0	COPS7B	protein_coding
ENSG00000144524	mature-tRNA-Gly-GCC_5_end_3	ENSG00000144524|ENST00000410017	154	-29.15	2	24	215	250	25	0.6	0.72	ENSG00000144524|ENST00000410017	mature-tRNA-Gly-GCC_5_end_3	0	55	60	55	60	4549	6mer	x	6mer	0		0	COPS7B	protein_coding
ENSG00000144524	mature-tRNA-Gly-GCC_5_end_4	ENSG00000144524|ENST00000410017	154	-29.42	2	24	214	250	25	0.6	0.72	ENSG00000144524|ENST00000410017	mature-tRNA-Gly-GCC_5_end_4	0	55	60	55	60	4550	6mer	x	6mer	0		0	COPS7B	protein_coding
ENSG00000160862	mature-tRNA-Glu-TTC_5_end_1	ENSG00000160862|ENST00000419575	175	-36.44	2	32	185	217	32	0.6562	0.75	ENSG00000160862|ENST00000419575	mature-tRNA-Glu-TTC_5_end_1	0	18	23	18	23	4566	6mer	x	6mer	0		0	AZGP1	protein_coding
ENSG00000141979	mature-tRNA-Glu-CTC_5_end_1	ENSG00000141979|ENST00000409035	155	-28.71	2	25	341	374	24	0.625	0.7083	ENSG00000141979|ENST00000409035	mature-tRNA-Glu-CTC_5_end_1	0	46	51	46	51	4606	6mer	x	6mer	0		0	AC008764.1	protein_coding
ENSG00000137868	mature-tRNA-Glu-CTC_5_end_1	ENSG00000137868|ENST00000416286	161	-31.8	2	30	237	269	30	0.6	0.7333	ENSG00000137868|ENST00000416286	mature-tRNA-Glu-CTC_5_end_1	0	20	25	20	25	4610	6mer	x	6mer	0		0	STRA6	protein_coding
ENSG00000138101	mature-tRNA-Glu-CTC_5_end_1	ENSG00000138101|ENST00000407661	172	-41.02	2	32	131	167	34	0.6471	0.7353	ENSG00000138101|ENST00000407661	mature-tRNA-Glu-CTC_5_end_1	0	23	28	23	28	4637	6mer	x	6mer	0		0	DTNB	protein_coding
ENSG00000138078	mature-tRNA-Gly-GCC_5_end_5	ENSG00000138078|ENST00000409957	160	-23.27	2	31	634	668	34	0.6176	0.7353	ENSG00000138078|ENST00000409957	mature-tRNA-Gly-GCC_5_end_5	0	27	32	27	32	4665	6mer	x	6mer	0		0	PREPL	protein_coding
ENSG00000151948	mature-tRNA-Glu-CTC_5_end_1	ENSG00000151948|ENST00000413816	143	-30.53	2	21	1733	1767	21	0.5714	0.7143	ENSG00000151948|ENST00000413816	mature-tRNA-Glu-CTC_5_end_1	0	37	43	37	43	4735	7mer-1a	x	7mer-1a	0		0	GLT1D1	protein_coding
ENSG00000130559	mature-tRNA-Gly-GCC_5_end_5	ENSG00000130559|ENST00000409386	156	-22.98	2	23	674	712	28	0.6429	0.7143	ENSG00000130559|ENST00000409386	mature-tRNA-Gly-GCC_5_end_5	0	20	25	20	25	4748	6mer	x	6mer	0		0	CAMSAP1	protein_coding
ENSG00000115282	mature-tRNA-Glu-CTC_5_end_1	ENSG00000115282|ENST00000410003	140	-20.93	2	9	1	19	7	1	1	ENSG00000115282|ENST00000410003	mature-tRNA-Glu-CTC_5_end_1	0	24	29	24	29	4754	6mer	x	6mer	0		0	TTC31	protein_coding
ENSG00000223865	mature-tRNA-Glu-CTC_5_end_1	ENSG00000223865|ENST00000418931	160	-30.96	2	22	2517	2551	22	0.6364	0.8182	ENSG00000223865|ENST00000418931	mature-tRNA-Glu-CTC_5_end_1	0	43	48	43	48	4779	6mer	x	6mer	0		0	HLA-DPB1	protein_coding
ENSG00000144057	mature-tRNA-Glu-CTC_5_end_1	ENSG00000144057|ENST00000409382	152	-25.99	2	30	2005	2034	28	0.5357	0.75	ENSG00000144057|ENST00000409382	mature-tRNA-Glu-CTC_5_end_1	0	48	53	48	53	4851	6mer	x	6mer	0		0	ST6GAL2	protein_coding
ENSG00000144057	mature-tRNA-Glu-CTC_5_end_2	ENSG00000144057|ENST00000409382	140	-21.05	2	9	3840	3869	7	1	1	ENSG00000144057|ENST00000409382	mature-tRNA-Glu-CTC_5_end_2	0	48	53	48	53	4852	6mer	x	6mer	0		0	ST6GAL2	protein_coding
ENSG00000144057	mature-tRNA-Glu-CTC_5_end_3	ENSG00000144057|ENST00000409382	140	-21.05	2	9	3839	3869	7	1	1	ENSG00000144057|ENST00000409382	mature-tRNA-Glu-CTC_5_end_3	0	48	53	48	53	4853	6mer	x	6mer	0		0	ST6GAL2	protein_coding
ENSG00000144057	mature-tRNA-Glu-CTC_5_end_4	ENSG00000144057|ENST00000409382	140	-23.87	2	9	3837	3869	7	1	1	ENSG00000144057|ENST00000409382	mature-tRNA-Glu-CTC_5_end_4	0	48	53	48	53	4854	6mer	x	6mer	0		0	ST6GAL2	protein_coding
ENSG00000171877	mature-tRNA-Glu-CTC_5_end_1	ENSG00000171877|ENST00000417257	163	-30.74	2	32	472	503	31	0.6129	0.7097	ENSG00000171877|ENST00000417257	mature-tRNA-Glu-CTC_5_end_1	0	32	37	32	37	4855	6mer	x	6mer	0		0	FRMD5	protein_coding
ENSG00000185920	mature-tRNA-Glu-TTC_5_end_1	ENSG00000185920|ENST00000418258	153	-20.34	2	32	1402	1433	30	0.5	0.7	ENSG00000185920|ENST00000418258	mature-tRNA-Glu-TTC_5_end_1	0	26	32	26	32	4928	7mer-1a	x	7mer-1a	0		0	PTCH1	protein_coding
ENSG00000235109	mature-tRNA-Gly-GCC_5_end_5	ENSG00000235109|ENST00000414429	163	-16.87	2	30	1253	1280	28	0.6786	0.7143	ENSG00000235109|ENST00000414429	mature-tRNA-Gly-GCC_5_end_5	0	36	41	36	41	4938	6mer	x	6mer	0		0	ZSCAN31	protein_coding
ENSG00000188033	mature-tRNA-Glu-CTC_5_end_1	ENSG00000188033|ENST00000414906	148	-24.96	2	30	232	261	28	0.5714	0.6786	ENSG00000188033|ENST00000414906	mature-tRNA-Glu-CTC_5_end_1	0	18	24	18	24	5028	7mer-1a	x	7mer-1a	0		0	ZNF490	protein_coding
ENSG00000188033	mature-tRNA-Glu-CTC_5_end_2	ENSG00000188033|ENST00000414906	155	-24.67	2	29	235	261	27	0.6296	0.7037	ENSG00000188033|ENST00000414906	mature-tRNA-Glu-CTC_5_end_2	0	18	24	18	24	5029	7mer-1a	x	7mer-1a	0		0	ZNF490	protein_coding
ENSG00000188033	mature-tRNA-Glu-CTC_5_end_3	ENSG00000188033|ENST00000414906	156	-24.67	2	30	234	261	28	0.6071	0.7143	ENSG00000188033|ENST00000414906	mature-tRNA-Glu-CTC_5_end_3	0	18	24	18	24	5030	7mer-1a	x	7mer-1a	0		0	ZNF490	protein_coding
ENSG00000188033	mature-tRNA-Glu-CTC_5_end_4	ENSG00000188033|ENST00000414906	156	-24.67	2	30	232	261	28	0.6071	0.7143	ENSG00000188033|ENST00000414906	mature-tRNA-Glu-CTC_5_end_4	0	18	24	18	24	5031	7mer-1a	x	7mer-1a	0		0	ZNF490	protein_coding
ENSG00000007372	mature-tRNA-Glu-CTC_5_end_1	ENSG00000007372|ENST00000419022	169	-30.63	2	31	4480	4514	31	0.5806	0.7419	ENSG00000007372|ENST00000419022	mature-tRNA-Glu-CTC_5_end_1	0	17	23	17	23	5039	7mer-m8	x	7mer-m8	0		0	PAX6	protein_coding
ENSG00000155066	mature-tRNA-Gly-GCC_5_end_5	ENSG00000155066|ENST00000431567	164	-14.79	2	30	3132	3164	29	0.5517	0.7586	ENSG00000155066|ENST00000431567	mature-tRNA-Gly-GCC_5_end_5	0	31	36	31	36	5067	6mer	x	6mer	0		0	PROM2	protein_coding
ENSG00000072163	mature-tRNA-Glu-CTC_5_end_1	ENSG00000072163|ENST00000426981	165	-31.17	2	29	403	435	28	0.6071	0.7857	ENSG00000072163|ENST00000426981	mature-tRNA-Glu-CTC_5_end_1	0	52	58	52	58	5106	7mer-1a	x	7mer-1a	0		0	LIMS2	protein_coding
ENSG00000137809	mature-tRNA-Gly-GCC_5_end_5	ENSG00000137809|ENST00000423218	149	-16.59	2	19	5760	5794	20	0.7	0.7	ENSG00000137809|ENST00000423218	mature-tRNA-Gly-GCC_5_end_5	0	15	21	15	21	5111	7mer-1a	x	7mer-1a	0		0	ITGA11	protein_coding
ENSG00000171552	mature-tRNA-Glu-CTC_5_end_1	ENSG00000171552|ENST00000422920	154	-33.09	2	24	319	353	24	0.5833	0.75	ENSG00000171552|ENST00000422920	mature-tRNA-Glu-CTC_5_end_1	0	30	36	30	36	5118	7mer-m8	x	7mer-m8	0		0	BCL2L1	protein_coding
ENSG00000112561	mature-tRNA-Glu-CTC_5_end_1	ENSG00000112561|ENST00000424495	166	-42.81	2	31	28	59	30	0.6	0.7667	ENSG00000112561|ENST00000424495	mature-tRNA-Glu-CTC_5_end_1	0	16	22	16	22	5134	7mer-1a	x	7mer-1a	0		0	TFEB	protein_coding
ENSG00000147642	mature-tRNA-Glu-TTC_5_end_1	ENSG00000147642|ENST00000424158	155	-29.07	2	28	13	43	26	0.6154	0.7308	ENSG00000147642|ENST00000424158	mature-tRNA-Glu-TTC_5_end_1	0	46	52	46	52	5150	7mer-m8	x	7mer-m8	0		0	SYBU	protein_coding
ENSG00000088543	mature-tRNA-Glu-CTC_5_end_1	ENSG00000088543|ENST00000426034	148	-33.61	2	32	1222	1252	30	0.5	0.6667	ENSG00000088543|ENST00000426034	mature-tRNA-Glu-CTC_5_end_1	0	27	32	27	32	5165	6mer	x	6mer	0		0	C3orf18	protein_coding
ENSG00000088543	mature-tRNA-Glu-CTC_5_end_2	ENSG00000088543|ENST00000426034	148	-26.3	2	29	1225	1252	27	0.5556	0.7037	ENSG00000088543|ENST00000426034	mature-tRNA-Glu-CTC_5_end_2	0	27	32	27	32	5166	6mer	x	6mer	0		0	C3orf18	protein_coding
ENSG00000088543	mature-tRNA-Glu-CTC_5_end_3	ENSG00000088543|ENST00000426034	149	-27.51	2	30	1224	1252	28	0.5357	0.7143	ENSG00000088543|ENST00000426034	mature-tRNA-Glu-CTC_5_end_3	0	27	32	27	32	5167	6mer	x	6mer	0		0	C3orf18	protein_coding
ENSG00000088543	mature-tRNA-Glu-CTC_5_end_4	ENSG00000088543|ENST00000426034	151	-31.7	2	32	1222	1252	30	0.5333	0.7	ENSG00000088543|ENST00000426034	mature-tRNA-Glu-CTC_5_end_4	0	27	32	27	32	5168	6mer	x	6mer	0		0	C3orf18	protein_coding
ENSG00000198740	mature-tRNA-Glu-CTC_5_end_1	ENSG00000198740|ENST00000430262	142	-25.26	2	23	175	204	21	0.619	0.6667	ENSG00000198740|ENST00000430262	mature-tRNA-Glu-CTC_5_end_1	0	23	28	23	28	5172	6mer	x	6mer	0		0	ZNF652	protein_coding
ENSG00000198740	mature-tRNA-Glu-CTC_5_end_2	ENSG00000198740|ENST00000430262	145	-24.16	2	23	178	204	21	0.6667	0.7143	ENSG00000198740|ENST00000430262	mature-tRNA-Glu-CTC_5_end_2	0	23	28	23	28	5173	6mer	x	6mer	0		0	ZNF652	protein_coding
ENSG00000198740	mature-tRNA-Glu-CTC_5_end_3	ENSG00000198740|ENST00000430262	145	-24.65	2	23	177	204	21	0.6667	0.7143	ENSG00000198740|ENST00000430262	mature-tRNA-Glu-CTC_5_end_3	0	23	28	23	28	5174	6mer	x	6mer	0		0	ZNF652	protein_coding
ENSG00000198740	mature-tRNA-Glu-CTC_5_end_4	ENSG00000198740|ENST00000430262	145	-24.65	2	23	175	204	21	0.6667	0.7143	ENSG00000198740|ENST00000430262	mature-tRNA-Glu-CTC_5_end_4	0	23	28	23	28	5175	6mer	x	6mer	0		0	ZNF652	protein_coding
ENSG00000182667	mature-tRNA-Gly-GCC_5_end_5	ENSG00000182667|ENST00000425719	155	-17.64	2	28	72	103	26	0.5769	0.6538	ENSG00000182667|ENST00000425719	mature-tRNA-Gly-GCC_5_end_5	0	24	30	24	30	5183	7mer-m8	x	7mer-m8	0		0	NTM	protein_coding
ENSG00000115875	mature-tRNA-Glu-TTC_5_end_1	ENSG00000115875|ENST00000425778	155	-21.33	2	26	922	953	24	0.625	0.7083	ENSG00000115875|ENST00000425778	mature-tRNA-Glu-TTC_5_end_1	0	16	21	16	21	5218	6mer	x	6mer	0		0	SRSF7	protein_coding
ENSG00000198242	mature-tRNA-Gly-CCC_5_end_1	ENSG00000198242|ENST00000422514	154	-20.6	2	28	296	321	26	0.6154	0.7308	ENSG00000198242|ENST00000422514	mature-tRNA-Gly-CCC_5_end_1	0	44	50	44	50	5219	7mer-1a	x	7mer-1a	0		0	RPL23A	protein_coding
ENSG00000198242	mature-tRNA-Gly-GCC_5_end_1	ENSG00000198242|ENST00000422514	157	-23.19	2	29	293	321	27	0.5926	0.7037	ENSG00000198242|ENST00000422514	mature-tRNA-Gly-GCC_5_end_1	0	44	50	44	50	5220	7mer-1a	x	7mer-1a	0		0	RPL23A	protein_coding
ENSG00000198242	mature-tRNA-Gly-GCC_5_end_2	ENSG00000198242|ENST00000422514	157	-23.31	2	29	292	321	27	0.5926	0.7037	ENSG00000198242|ENST00000422514	mature-tRNA-Gly-GCC_5_end_2	0	44	50	44	50	5221	7mer-1a	x	7mer-1a	0		0	RPL23A	protein_coding
ENSG00000198242	mature-tRNA-Gly-GCC_5_end_3	ENSG00000198242|ENST00000422514	157	-24.08	2	29	291	321	27	0.5926	0.7037	ENSG00000198242|ENST00000422514	mature-tRNA-Gly-GCC_5_end_3	0	44	50	44	50	5222	7mer-1a	x	7mer-1a	0		0	RPL23A	protein_coding
ENSG00000198242	mature-tRNA-Gly-GCC_5_end_4	ENSG00000198242|ENST00000422514	157	-24.35	2	29	290	321	27	0.5926	0.7037	ENSG00000198242|ENST00000422514	mature-tRNA-Gly-GCC_5_end_4	0	44	50	44	50	5223	7mer-1a	x	7mer-1a	0		0	RPL23A	protein_coding
ENSG00000143190	mature-tRNA-Gly-GCC_5_end_5	ENSG00000143190|ENST00000429375	163	-17.65	2	31	2182	2214	31	0.6452	0.6774	ENSG00000143190|ENST00000429375	mature-tRNA-Gly-GCC_5_end_5	0	41	46	41	46	5233	6mer	x	6mer	0		0	POU2F1	protein_coding
ENSG00000115841	mature-tRNA-Gly-GCC_5_end_5	ENSG00000115841|ENST00000425641	143	-16.13	2	13	51	83	12	0.8333	0.8333	ENSG00000115841|ENST00000425641	mature-tRNA-Gly-GCC_5_end_5	0	15	21	15	21	5252	7mer-1a	x	7mer-1a	0		0	RMDN2	protein_coding
ENSG00000172113	mature-tRNA-Glu-CTC_5_end_1	ENSG00000172113|ENST00000426689	163	-26.56	2	31	49	79	29	0.6207	0.6897	ENSG00000172113|ENST00000426689	mature-tRNA-Glu-CTC_5_end_1	0	45	50	45	50	5255	6mer	x	6mer	0		0	NME6	protein_coding
ENSG00000172113	mature-tRNA-Glu-CTC_5_end_2	ENSG00000172113|ENST00000426689	159	-26.23	2	29	47	79	30	0.5667	0.7	ENSG00000172113|ENST00000426689	mature-tRNA-Glu-CTC_5_end_2	0	45	50	45	50	5256	6mer	x	6mer	0		0	NME6	protein_coding
ENSG00000172113	mature-tRNA-Glu-CTC_5_end_3	ENSG00000172113|ENST00000426689	160	-26.23	2	30	46	79	31	0.5484	0.7097	ENSG00000172113|ENST00000426689	mature-tRNA-Glu-CTC_5_end_3	0	45	50	45	50	5257	6mer	x	6mer	0		0	NME6	protein_coding
ENSG00000172113	mature-tRNA-Glu-CTC_5_end_4	ENSG00000172113|ENST00000426689	162	-26.86	2	32	44	79	33	0.5455	0.697	ENSG00000172113|ENST00000426689	mature-tRNA-Glu-CTC_5_end_4	0	45	50	45	50	5258	6mer	x	6mer	0		0	NME6	protein_coding
ENSG00000163946	mature-tRNA-Gly-GCC_5_end_5	ENSG00000163946|ENST00000431842	179	-24.47	2	28	1024	1055	26	0.6923	0.7692	ENSG00000163946|ENST00000431842	mature-tRNA-Gly-GCC_5_end_5	0	35	41	35	41	5269	7mer-1a	x	7mer-1a	0		0	TASOR	protein_coding
ENSG00000186654	mature-tRNA-Glu-CTC_5_end_1	ENSG00000186654|ENST00000431834	157	-31.42	2	32	498	532	32	0.5625	0.6875	ENSG00000186654|ENST00000431834	mature-tRNA-Glu-CTC_5_end_1	0	26	32	26	32	5270	7mer-1a	x	7mer-1a	0		0	PRR5	protein_coding
ENSG00000082898	mature-tRNA-Gly-GCC_5_end_5	ENSG00000082898|ENST00000428210	157	-17.36	2	31	3805	3836	31	0.6452	0.6774	ENSG00000082898|ENST00000428210	mature-tRNA-Gly-GCC_5_end_5	0	48	53	48	53	5278	6mer	x	6mer	0		0	XPO1	protein_coding
ENSG00000112511	mature-tRNA-Glu-CTC_5_end_1	ENSG00000112511|ENST00000427826	150	-22.65	2	16	1	16	15	0.7333	0.8667	ENSG00000112511|ENST00000427826	mature-tRNA-Glu-CTC_5_end_1	0	37	42	37	42	5333	6mer	x	6mer	0		0	PHF1	protein_coding
ENSG00000112511	mature-tRNA-Glu-CTC_5_end_2	ENSG00000112511|ENST00000427826	150	-19.94	2	16	1	16	15	0.7333	0.8667	ENSG00000112511|ENST00000427826	mature-tRNA-Glu-CTC_5_end_2	0	37	42	37	42	5334	6mer	x	6mer	0		0	PHF1	protein_coding
ENSG00000112511	mature-tRNA-Glu-CTC_5_end_3	ENSG00000112511|ENST00000427826	150	-19.94	2	16	1	16	15	0.7333	0.8667	ENSG00000112511|ENST00000427826	mature-tRNA-Glu-CTC_5_end_3	0	37	42	37	42	5335	6mer	x	6mer	0		0	PHF1	protein_coding
ENSG00000112511	mature-tRNA-Glu-CTC_5_end_4	ENSG00000112511|ENST00000427826	150	-19.94	2	16	1	16	15	0.7333	0.8667	ENSG00000112511|ENST00000427826	mature-tRNA-Glu-CTC_5_end_4	0	37	42	37	42	5336	6mer	x	6mer	0		0	PHF1	protein_coding
ENSG00000147234	mature-tRNA-Glu-CTC_5_end_1	ENSG00000147234|ENST00000439554	165	-37.19	2	32	320	357	35	0.5429	0.7429	ENSG00000147234|ENST00000439554	mature-tRNA-Glu-CTC_5_end_1	0	23	29	23	29	5431	7mer-1a	x	7mer-1a	0		0	FRMPD3	protein_coding
ENSG00000142192	mature-tRNA-Glu-TTC_5_end_1	ENSG00000142192|ENST00000439274	162	-28.14	2	32	52	85	33	0.6061	0.7273	ENSG00000142192|ENST00000439274	mature-tRNA-Glu-TTC_5_end_1	0	21	26	21	26	5490	6mer	x	6mer	0		0	APP	protein_coding
ENSG00000211456	mature-tRNA-Gly-CCC_5_end_1	ENSG00000211456|ENST00000441228	152	-14.65	2	27	823	849	26	0.6538	0.7308	ENSG00000211456|ENST00000441228	mature-tRNA-Gly-CCC_5_end_1	0	41	47	41	47	5526	7mer-m8	x	7mer-m8	0		0	SACM1L	protein_coding
ENSG00000211456	mature-tRNA-Gly-GCC_5_end_1	ENSG00000211456|ENST00000441228	152	-17.36	2	27	821	849	26	0.6538	0.7308	ENSG00000211456|ENST00000441228	mature-tRNA-Gly-GCC_5_end_1	0	41	47	41	47	5527	7mer-m8	x	7mer-m8	0		0	SACM1L	protein_coding
ENSG00000211456	mature-tRNA-Gly-GCC_5_end_2	ENSG00000211456|ENST00000441228	156	-17.36	2	31	820	849	30	0.6333	0.7	ENSG00000211456|ENST00000441228	mature-tRNA-Gly-GCC_5_end_2	0	41	47	41	47	5528	7mer-m8	x	7mer-m8	0		0	SACM1L	protein_coding
ENSG00000211456	mature-tRNA-Gly-GCC_5_end_3	ENSG00000211456|ENST00000441228	156	-17.36	2	31	819	849	30	0.6333	0.7	ENSG00000211456|ENST00000441228	mature-tRNA-Gly-GCC_5_end_3	0	41	47	41	47	5529	7mer-m8	x	7mer-m8	0		0	SACM1L	protein_coding
ENSG00000211456	mature-tRNA-Gly-GCC_5_end_4	ENSG00000211456|ENST00000441228	156	-17.36	2	31	818	849	30	0.6333	0.7	ENSG00000211456|ENST00000441228	mature-tRNA-Gly-GCC_5_end_4	0	41	47	41	47	5530	7mer-m8	x	7mer-m8	0		0	SACM1L	protein_coding
ENSG00000096070	mature-tRNA-Glu-CTC_5_end_1	ENSG00000096070|ENST00000441730	160	-36.3	2	32	802	838	34	0.5588	0.7353	ENSG00000096070|ENST00000441730	mature-tRNA-Glu-CTC_5_end_1	0	19	24	19	24	5532	6mer	x	6mer	0		0	BRPF3	protein_coding
ENSG00000138434	mature-tRNA-Glu-TTC_5_end_1	ENSG00000138434|ENST00000440623	162	-26.76	2	30	1445	1478	30	0.6	0.7333	ENSG00000138434|ENST00000440623	mature-tRNA-Glu-TTC_5_end_1	0	31	36	31	36	5600	6mer	x	6mer	0		0	ITPRID2	protein_coding
ENSG00000164659	mature-tRNA-Gly-CCC_5_end_1	ENSG00000164659|ENST00000444627	157	-22.11	2	27	266	295	26	0.6154	0.6923	ENSG00000164659|ENST00000444627	mature-tRNA-Gly-CCC_5_end_1	0	49	54	49	54	5603	6mer	x	6mer	0		0	ELAPOR2	protein_coding
ENSG00000164659	mature-tRNA-Gly-GCC_5_end_1	ENSG00000164659|ENST00000444627	157	-24.51	2	27	264	295	26	0.6154	0.6923	ENSG00000164659|ENST00000444627	mature-tRNA-Gly-GCC_5_end_1	0	49	54	49	54	5604	6mer	x	6mer	0		0	ELAPOR2	protein_coding
ENSG00000164659	mature-tRNA-Gly-GCC_5_end_2	ENSG00000164659|ENST00000444627	157	-24.63	2	27	263	295	26	0.6154	0.6923	ENSG00000164659|ENST00000444627	mature-tRNA-Gly-GCC_5_end_2	0	49	54	49	54	5605	6mer	x	6mer	0		0	ELAPOR2	protein_coding
ENSG00000164659	mature-tRNA-Gly-GCC_5_end_3	ENSG00000164659|ENST00000444627	157	-24.63	2	27	262	295	26	0.6154	0.6923	ENSG00000164659|ENST00000444627	mature-tRNA-Gly-GCC_5_end_3	0	49	54	49	54	5606	6mer	x	6mer	0		0	ELAPOR2	protein_coding
ENSG00000164659	mature-tRNA-Gly-GCC_5_end_4	ENSG00000164659|ENST00000444627	157	-24.63	2	27	261	295	26	0.6154	0.6923	ENSG00000164659|ENST00000444627	mature-tRNA-Gly-GCC_5_end_4	0	49	54	49	54	5607	6mer	x	6mer	0		0	ELAPOR2	protein_coding
ENSG00000141956	mature-tRNA-Glu-CTC_5_end_1	ENSG00000141956|ENST00000441787	169	-33.59	2	28	3789	3824	29	0.6897	0.7241	ENSG00000141956|ENST00000441787	mature-tRNA-Glu-CTC_5_end_1	0	27	33	27	33	5637	7mer-m8	x	7mer-m8	0		0	PRDM15	protein_coding
ENSG00000141956	mature-tRNA-Glu-CTC_5_end_2	ENSG00000141956|ENST00000441787	165	-27.99	2	28	3792	3824	29	0.6552	0.7241	ENSG00000141956|ENST00000441787	mature-tRNA-Glu-CTC_5_end_2	0	27	33	27	33	5638	7mer-m8	x	7mer-m8	0		0	PRDM15	protein_coding
ENSG00000141956	mature-tRNA-Glu-CTC_5_end_3	ENSG00000141956|ENST00000441787	165	-30.31	2	28	3791	3824	29	0.6552	0.7241	ENSG00000141956|ENST00000441787	mature-tRNA-Glu-CTC_5_end_3	0	27	33	27	33	5639	7mer-m8	x	7mer-m8	0		0	PRDM15	protein_coding
ENSG00000141956	mature-tRNA-Glu-CTC_5_end_4	ENSG00000141956|ENST00000441787	165	-31.65	2	28	3789	3824	29	0.6552	0.7241	ENSG00000141956|ENST00000441787	mature-tRNA-Glu-CTC_5_end_4	0	27	33	27	33	5640	7mer-m8	x	7mer-m8	0		0	PRDM15	protein_coding
ENSG00000094631	mature-tRNA-Glu-CTC_5_end_1	ENSG00000094631|ENST00000441703	162	-31.18	2	28	23	54	27	0.6667	0.7778	ENSG00000094631|ENST00000441703	mature-tRNA-Glu-CTC_5_end_1	0	47	53	47	53	5641	7mer-m8	x	7mer-m8	0		0	HDAC6	protein_coding
ENSG00000094631	mature-tRNA-Glu-CTC_5_end_2	ENSG00000094631|ENST00000441703	170	-34.87	2	28	26	54	27	0.7037	0.8148	ENSG00000094631|ENST00000441703	mature-tRNA-Glu-CTC_5_end_2	0	47	53	47	53	5642	7mer-m8	x	7mer-m8	0		0	HDAC6	protein_coding
ENSG00000094631	mature-tRNA-Glu-CTC_5_end_3	ENSG00000094631|ENST00000441703	170	-34.87	2	28	25	54	27	0.7037	0.8148	ENSG00000094631|ENST00000441703	mature-tRNA-Glu-CTC_5_end_3	0	47	53	47	53	5643	7mer-m8	x	7mer-m8	0		0	HDAC6	protein_coding
ENSG00000094631	mature-tRNA-Glu-CTC_5_end_4	ENSG00000094631|ENST00000441703	170	-35.6	2	28	23	54	27	0.7037	0.8148	ENSG00000094631|ENST00000441703	mature-tRNA-Glu-CTC_5_end_4	0	47	53	47	53	5644	7mer-m8	x	7mer-m8	0		0	HDAC6	protein_coding
ENSG00000168280	mature-tRNA-Glu-CTC_5_end_1	ENSG00000168280|ENST00000435030	152	-37.48	2	32	1357	1399	40	0.55	0.65	ENSG00000168280|ENST00000435030	mature-tRNA-Glu-CTC_5_end_1	0	36	41	36	41	5678	6mer	x	6mer	0		0	KIF5C	protein_coding
ENSG00000235162	mature-tRNA-Glu-CTC_5_end_1	ENSG00000235162|ENST00000443585	154	-25.85	2	29	263	294	27	0.4815	0.7778	ENSG00000235162|ENST00000443585	mature-tRNA-Glu-CTC_5_end_1	0	45	50	45	50	5702	6mer	x	6mer	0		0	C12orf75	protein_coding
ENSG00000184182	mature-tRNA-Glu-CTC_5_end_1	ENSG00000184182|ENST00000439338	150	-32.71	2	29	131	171	35	0.5714	0.6286	ENSG00000184182|ENST00000439338	mature-tRNA-Glu-CTC_5_end_1	0	23	28	23	28	5708	6mer	x	6mer	0		0	UBE2F	protein_coding
ENSG00000184182	mature-tRNA-Glu-CTC_5_end_2	ENSG00000184182|ENST00000439338	157	-29.04	2	27	140	171	27	0.5556	0.7407	ENSG00000184182|ENST00000439338	mature-tRNA-Glu-CTC_5_end_2	0	23	28	23	28	5709	6mer	x	6mer	0		0	UBE2F	protein_coding
ENSG00000184182	mature-tRNA-Glu-CTC_5_end_3	ENSG00000184182|ENST00000439338	157	-29.04	2	27	139	171	27	0.5556	0.7407	ENSG00000184182|ENST00000439338	mature-tRNA-Glu-CTC_5_end_3	0	23	28	23	28	5710	6mer	x	6mer	0		0	UBE2F	protein_coding
ENSG00000184182	mature-tRNA-Glu-CTC_5_end_4	ENSG00000184182|ENST00000439338	157	-29.33	2	27	137	171	27	0.5556	0.7407	ENSG00000184182|ENST00000439338	mature-tRNA-Glu-CTC_5_end_4	0	23	28	23	28	5711	6mer	x	6mer	0		0	UBE2F	protein_coding
ENSG00000143776	mature-tRNA-Gly-GCC_5_end_5	ENSG00000143776|ENST00000442054	151	-17.11	2	17	281	313	16	0.75	0.8125	ENSG00000143776|ENST00000442054	mature-tRNA-Gly-GCC_5_end_5	0	31	37	31	37	5718	7mer-1a	x	7mer-1a	0		0	CDC42BPA	protein_coding
ENSG00000092068	mature-tRNA-Glu-CTC_5_end_1	ENSG00000092068|ENST00000453702	161	-31.86	2	27	436	471	28	0.6071	0.7143	ENSG00000092068|ENST00000453702	mature-tRNA-Glu-CTC_5_end_1	0	27	33	27	33	5792	7mer-m8	x	7mer-m8	0		0	SLC7A8	protein_coding
ENSG00000092068	mature-tRNA-Glu-CTC_5_end_2	ENSG00000092068|ENST00000453702	161	-30.67	2	27	439	471	28	0.6071	0.7143	ENSG00000092068|ENST00000453702	mature-tRNA-Glu-CTC_5_end_2	0	27	33	27	33	5793	7mer-m8	x	7mer-m8	0		0	SLC7A8	protein_coding
ENSG00000092068	mature-tRNA-Glu-CTC_5_end_3	ENSG00000092068|ENST00000453702	161	-30.79	2	27	438	471	28	0.6071	0.7143	ENSG00000092068|ENST00000453702	mature-tRNA-Glu-CTC_5_end_3	0	27	33	27	33	5794	7mer-m8	x	7mer-m8	0		0	SLC7A8	protein_coding
ENSG00000092068	mature-tRNA-Glu-CTC_5_end_4	ENSG00000092068|ENST00000453702	161	-32.4	2	27	436	471	28	0.6071	0.7143	ENSG00000092068|ENST00000453702	mature-tRNA-Glu-CTC_5_end_4	0	27	33	27	33	5795	7mer-m8	x	7mer-m8	0		0	SLC7A8	protein_coding
ENSG00000168477	mature-tRNA-Glu-CTC_5_end_1	ENSG00000168477|ENST00000451343	154	-37.89	2	32	40	75	33	0.5455	0.6364	ENSG00000168477|ENST00000451343	mature-tRNA-Glu-CTC_5_end_1	0	49	55	49	55	5866	7mer-1a	x	7mer-1a	0		0	TNXB	protein_coding
ENSG00000077782	mature-tRNA-Gly-GCC_5_end_5	ENSG00000077782|ENST00000447712	157	-16.82	2	29	1537	1566	27	0.6296	0.6667	ENSG00000077782|ENST00000447712	mature-tRNA-Gly-GCC_5_end_5	0	31	36	31	36	5874	6mer	x	6mer	0		0	FGFR1	protein_coding
ENSG00000092203	mature-tRNA-Glu-CTC_5_end_1	ENSG00000092203|ENST00000448790	165	-37.82	2	31	1995	2030	33	0.6364	0.7576	ENSG00000092203|ENST00000448790	mature-tRNA-Glu-CTC_5_end_1	0	23	29	23	29	5911	7mer-1a	x	7mer-1a	0		0	TOX4	protein_coding
ENSG00000092203	mature-tRNA-Glu-CTC_5_end_2	ENSG00000092203|ENST00000448790	170	-28.68	2	22	2110	2139	21	0.8095	0.8571	ENSG00000092203|ENST00000448790	mature-tRNA-Glu-CTC_5_end_2	0	23	29	23	29	5912	7mer-1a	x	7mer-1a	0		0	TOX4	protein_coding
ENSG00000092203	mature-tRNA-Glu-CTC_5_end_3	ENSG00000092203|ENST00000448790	170	-28.68	2	22	2109	2139	21	0.8095	0.8571	ENSG00000092203|ENST00000448790	mature-tRNA-Glu-CTC_5_end_3	0	23	29	23	29	5913	7mer-1a	x	7mer-1a	0		0	TOX4	protein_coding
ENSG00000092203	mature-tRNA-Glu-CTC_5_end_4	ENSG00000092203|ENST00000448790	170	-28.68	2	22	2107	2139	21	0.8095	0.8571	ENSG00000092203|ENST00000448790	mature-tRNA-Glu-CTC_5_end_4	0	23	29	23	29	5914	7mer-1a	x	7mer-1a	0		0	TOX4	protein_coding
ENSG00000186472	mature-tRNA-Glu-CTC_5_end_1	ENSG00000186472|ENST00000456006	159	-35.15	2	30	2	36	30	0.5333	0.7667	ENSG00000186472|ENST00000456006	mature-tRNA-Glu-CTC_5_end_1	0	50	56	50	56	5921	7mer-m8	x	7mer-m8	0		0	PCLO	protein_coding
ENSG00000186472	mature-tRNA-Glu-CTC_5_end_2	ENSG00000186472|ENST00000456006	158	-34.27	2	25	5	36	25	0.6	0.8	ENSG00000186472|ENST00000456006	mature-tRNA-Glu-CTC_5_end_2	0	50	56	50	56	5922	7mer-m8	x	7mer-m8	0		0	PCLO	protein_coding
ENSG00000186472	mature-tRNA-Glu-CTC_5_end_3	ENSG00000186472|ENST00000456006	159	-35.61	2	30	4	36	30	0.5333	0.7667	ENSG00000186472|ENST00000456006	mature-tRNA-Glu-CTC_5_end_3	0	50	56	50	56	5923	7mer-m8	x	7mer-m8	0		0	PCLO	protein_coding
ENSG00000186472	mature-tRNA-Glu-CTC_5_end_4	ENSG00000186472|ENST00000456006	159	-35.61	2	30	2	36	30	0.5333	0.7667	ENSG00000186472|ENST00000456006	mature-tRNA-Glu-CTC_5_end_4	0	50	56	50	56	5924	7mer-m8	x	7mer-m8	0		0	PCLO	protein_coding
ENSG00000251537	mature-tRNA-Gly-GCC_5_end_5	ENSG00000251537|ENST00000455584	150	-17.81	2	27	132	167	31	0.6129	0.6452	ENSG00000251537|ENST00000455584	mature-tRNA-Gly-GCC_5_end_5	0	17	23	17	23	5932	7mer-m8	x	7mer-m8	0		0	AC005324.2	protein_coding
ENSG00000164659	mature-tRNA-Gly-CCC_5_end_1	ENSG00000164659|ENST00000450689	157	-22.11	2	27	266	295	26	0.6154	0.6923	ENSG00000164659|ENST00000450689	mature-tRNA-Gly-CCC_5_end_1	0	19	24	19	24	5969	6mer	x	6mer	0		0	ELAPOR2	protein_coding
ENSG00000164659	mature-tRNA-Gly-GCC_5_end_1	ENSG00000164659|ENST00000450689	157	-24.51	2	27	264	295	26	0.6154	0.6923	ENSG00000164659|ENST00000450689	mature-tRNA-Gly-GCC_5_end_1	0	19	24	19	24	5970	6mer	x	6mer	0		0	ELAPOR2	protein_coding
ENSG00000164659	mature-tRNA-Gly-GCC_5_end_2	ENSG00000164659|ENST00000450689	157	-24.63	2	27	263	295	26	0.6154	0.6923	ENSG00000164659|ENST00000450689	mature-tRNA-Gly-GCC_5_end_2	0	19	24	19	24	5971	6mer	x	6mer	0		0	ELAPOR2	protein_coding
ENSG00000164659	mature-tRNA-Gly-GCC_5_end_3	ENSG00000164659|ENST00000450689	157	-24.63	2	27	262	295	26	0.6154	0.6923	ENSG00000164659|ENST00000450689	mature-tRNA-Gly-GCC_5_end_3	0	19	24	19	24	5972	6mer	x	6mer	0		0	ELAPOR2	protein_coding
ENSG00000164659	mature-tRNA-Gly-GCC_5_end_4	ENSG00000164659|ENST00000450689	157	-24.63	2	27	261	295	26	0.6154	0.6923	ENSG00000164659|ENST00000450689	mature-tRNA-Gly-GCC_5_end_4	0	19	24	19	24	5973	6mer	x	6mer	0		0	ELAPOR2	protein_coding
ENSG00000074416	mature-tRNA-Glu-CTC_5_end_1	ENSG00000074416|ENST00000453507	174	-37.2	2	31	1010	1040	29	0.6897	0.7586	ENSG00000074416|ENST00000453507	mature-tRNA-Glu-CTC_5_end_1	0	30	36	30	36	6107	7mer-m8	x	7mer-m8	0		0	MGLL	protein_coding
ENSG00000074416	mature-tRNA-Glu-CTC_5_end_2	ENSG00000074416|ENST00000453507	164	-34.72	2	29	1013	1040	27	0.6667	0.7407	ENSG00000074416|ENST00000453507	mature-tRNA-Glu-CTC_5_end_2	0	30	36	30	36	6108	7mer-m8	x	7mer-m8	0		0	MGLL	protein_coding
ENSG00000074416	mature-tRNA-Glu-CTC_5_end_3	ENSG00000074416|ENST00000453507	169	-36.3	2	30	1012	1040	28	0.6786	0.75	ENSG00000074416|ENST00000453507	mature-tRNA-Glu-CTC_5_end_3	0	30	36	30	36	6109	7mer-m8	x	7mer-m8	0		0	MGLL	protein_coding
ENSG00000074416	mature-tRNA-Glu-CTC_5_end_4	ENSG00000074416|ENST00000453507	174	-37.54	2	31	1010	1040	29	0.6897	0.7586	ENSG00000074416|ENST00000453507	mature-tRNA-Glu-CTC_5_end_4	0	30	36	30	36	6110	7mer-m8	x	7mer-m8	0		0	MGLL	protein_coding
ENSG00000198563	mature-tRNA-Glu-CTC_5_end_1	ENSG00000198563|ENST00000458640	165	-37.13	2	32	25	56	30	0.6	0.7	ENSG00000198563|ENST00000458640	mature-tRNA-Glu-CTC_5_end_1	0	39	44	39	44	6215	6mer	x	6mer	0		0	DDX39B	protein_coding
ENSG00000198563	mature-tRNA-Glu-CTC_5_end_2	ENSG00000198563|ENST00000458640	157	-31.56	2	26	27	56	24	0.5833	0.7083	ENSG00000198563|ENST00000458640	mature-tRNA-Glu-CTC_5_end_2	0	39	44	39	44	6216	6mer	x	6mer	0		0	DDX39B	protein_coding
ENSG00000198563	mature-tRNA-Glu-CTC_5_end_3	ENSG00000198563|ENST00000458640	157	-35.63	2	26	26	56	24	0.5833	0.7083	ENSG00000198563|ENST00000458640	mature-tRNA-Glu-CTC_5_end_3	0	39	44	39	44	6217	6mer	x	6mer	0		0	DDX39B	protein_coding
ENSG00000198563	mature-tRNA-Glu-CTC_5_end_4	ENSG00000198563|ENST00000458640	161	-36.81	2	32	25	56	30	0.5667	0.7	ENSG00000198563|ENST00000458640	mature-tRNA-Glu-CTC_5_end_4	0	39	44	39	44	6218	6mer	x	6mer	0		0	DDX39B	protein_coding
ENSG00000260092	mature-tRNA-Glu-CTC_5_end_1	ENSG00000260092|ENST00000460606	167	-28.2	2	32	224	256	30	0.5667	0.7	ENSG00000260092|ENST00000460606	mature-tRNA-Glu-CTC_5_end_1	0	38	44	38	44	6224	7mer-m8	x	7mer-m8	0		0	AC009163.3	protein_coding
ENSG00000162772	mature-tRNA-Glu-CTC_5_end_1	ENSG00000162772|ENST00000464547	160	-37.1	2	31	30	64	33	0.6364	0.7273	ENSG00000162772|ENST00000464547	mature-tRNA-Glu-CTC_5_end_1	0	19	25	19	25	6262	7mer-m8	x	7mer-m8	0		0	ATF3	protein_coding
ENSG00000162772	mature-tRNA-Glu-CTC_5_end_2	ENSG00000162772|ENST00000464547	157	-31.93	2	27	34	64	26	0.5769	0.7308	ENSG00000162772|ENST00000464547	mature-tRNA-Glu-CTC_5_end_2	0	19	25	19	25	6263	7mer-m8	x	7mer-m8	0		0	ATF3	protein_coding
ENSG00000162772	mature-tRNA-Glu-CTC_5_end_3	ENSG00000162772|ENST00000464547	157	-33.78	2	27	33	64	26	0.5769	0.7308	ENSG00000162772|ENST00000464547	mature-tRNA-Glu-CTC_5_end_3	0	19	25	19	25	6264	7mer-m8	x	7mer-m8	0		0	ATF3	protein_coding
ENSG00000162772	mature-tRNA-Glu-CTC_5_end_4	ENSG00000162772|ENST00000464547	160	-35.89	2	31	30	64	31	0.5806	0.7097	ENSG00000162772|ENST00000464547	mature-tRNA-Glu-CTC_5_end_4	0	19	25	19	25	6265	7mer-m8	x	7mer-m8	0		0	ATF3	protein_coding
ENSG00000163728	mature-tRNA-Gly-GCC_5_end_5	ENSG00000163728|ENST00000465065	158	-12.37	2	29	5065	5098	29	0.5862	0.7241	ENSG00000163728|ENST00000465065	mature-tRNA-Gly-GCC_5_end_5	0	34	39	34	39	6290	6mer	x	6mer	0		0	TTC14	protein_coding
ENSG00000043093	mature-tRNA-Gly-GCC_5_end_5	ENSG00000043093|ENST00000460412	166	-17.98	2	25	942	972	23	0.6957	0.7826	ENSG00000043093|ENST00000460412	mature-tRNA-Gly-GCC_5_end_5	0	48	54	48	54	6346	7mer-1a	x	7mer-1a	0		0	DCUN1D1	protein_coding
ENSG00000144591	mature-tRNA-Glu-CTC_5_end_2	ENSG00000144591|ENST00000480034	149	-30.83	2	29	98	127	28	0.5357	0.7143	ENSG00000144591|ENST00000480034	mature-tRNA-Glu-CTC_5_end_2	0	43	48	43	48	6446	6mer	x	6mer	0		0	GMPPA	protein_coding
ENSG00000144591	mature-tRNA-Glu-CTC_5_end_3	ENSG00000144591|ENST00000480034	149	-30.96	2	29	97	127	28	0.5357	0.7143	ENSG00000144591|ENST00000480034	mature-tRNA-Glu-CTC_5_end_3	0	43	48	43	48	6447	6mer	x	6mer	0		0	GMPPA	protein_coding
ENSG00000258472	mature-tRNA-Glu-TTC_5_end_1	ENSG00000258472|ENST00000481916	155	-28.36	2	32	578	608	30	0.6	0.6667	ENSG00000258472|ENST00000481916	mature-tRNA-Glu-TTC_5_end_1	0	31	37	31	37	6494	7mer-1a	x	7mer-1a	0		0	AC005726.1	protein_coding
ENSG00000183833	mature-tRNA-Glu-CTC_5_end_1	ENSG00000183833|ENST00000475093	168	-28.82	2	29	1331	1363	29	0.6897	0.7241	ENSG00000183833|ENST00000475093	mature-tRNA-Glu-CTC_5_end_1	0	39	44	39	44	6506	6mer	x	6mer	0		0	CFAP91	protein_coding
ENSG00000203326	mature-tRNA-Gly-GCC_5_end_5	ENSG00000203326|ENST00000474037	173	-25.66	2	29	1933	1970	33	0.6667	0.7576	ENSG00000203326|ENST00000474037	mature-tRNA-Gly-GCC_5_end_5	0	31	38	31	38	6561	8mer-1a	x	8mer-1a	0		0	ZNF525	protein_coding
ENSG00000180336	mature-tRNA-Glu-CTC_5_end_1	ENSG00000180336|ENST00000472403	169	-43.34	2	32	1202	1233	32	0.6875	0.7188	ENSG00000180336|ENST00000472403	mature-tRNA-Glu-CTC_5_end_1	0	52	57	52	57	6604	6mer	x	6mer	0		0	MEIOC	protein_coding
ENSG00000116138	mature-tRNA-Glu-CTC_5_end_1	ENSG00000116138|ENST00000475133	165	-39.03	2	32	1505	1536	30	0.5667	0.7333	ENSG00000116138|ENST00000475133	mature-tRNA-Glu-CTC_5_end_1	0	22	28	22	28	6614	7mer-1a	x	7mer-1a	0		0	DNAJC16	protein_coding
ENSG00000168256	mature-tRNA-Glu-CTC_5_end_1	ENSG00000168256|ENST00000479407	155	-30.17	2	31	269	296	29	0.6207	0.6897	ENSG00000168256|ENST00000479407	mature-tRNA-Glu-CTC_5_end_1	0	50	55	50	55	6635	6mer	x	6mer	0		0	NKIRAS2	protein_coding
ENSG00000126733	mature-tRNA-Gly-GCC_5_end_5	ENSG00000126733|ENST00000484479	159	-14.12	2	29	2822	2854	28	0.6071	0.6786	ENSG00000126733|ENST00000484479	mature-tRNA-Gly-GCC_5_end_5	0	33	39	33	39	6673	7mer-m8	x	7mer-m8	0		0	DACH2	protein_coding
ENSG00000151136	mature-tRNA-Glu-TTC_5_end_1	ENSG00000151136|ENST00000490090	164	-21.72	2	32	1160	1190	30	0.5	0.8	ENSG00000151136|ENST00000490090	mature-tRNA-Glu-TTC_5_end_1	0	52	57	52	57	6678	6mer	x	6mer	0		0	BTBD11	protein_coding
ENSG00000198929	mature-tRNA-Glu-CTC_5_end_1	ENSG00000198929|ENST00000493151	150	-32.37	2	32	83	116	31	0.5161	0.6452	ENSG00000198929|ENST00000493151	mature-tRNA-Glu-CTC_5_end_1	0	39	44	39	44	6686	6mer	x	6mer	0		0	NOS1AP	protein_coding
ENSG00000131697	mature-tRNA-Glu-TTC_5_end_1	ENSG00000131697|ENST00000489180	162	-29.13	2	28	1336	1372	30	0.6	0.7	ENSG00000131697|ENST00000489180	mature-tRNA-Glu-TTC_5_end_1	0	15	20	15	20	6701	6mer	x	6mer	0		0	NPHP4	protein_coding
ENSG00000206530	mature-tRNA-Glu-CTC_5_end_1	ENSG00000206530|ENST00000489244	161	-24.5	2	30	3843	3875	28	0.5357	0.7143	ENSG00000206530|ENST00000489244	mature-tRNA-Glu-CTC_5_end_1	0	32	37	32	37	6724	6mer	x	6mer	0		0	CFAP44	protein_coding
ENSG00000117597	mature-tRNA-Glu-TTC_5_end_1	ENSG00000117597|ENST00000491415	151	-27.08	2	30	3850	3880	29	0.6552	0.6552	ENSG00000117597|ENST00000491415	mature-tRNA-Glu-TTC_5_end_1	0	33	40	33	40	6786	8mer-1a	x	8mer-1a	0		0	UTP25	protein_coding
ENSG00000012048	mature-tRNA-Glu-CTC_5_end_1	ENSG00000012048|ENST00000492859	159	-27.88	2	29	547	577	28	0.6786	0.6786	ENSG00000012048|ENST00000492859	mature-tRNA-Glu-CTC_5_end_1	0	51	56	51	56	6811	6mer	x	6mer	0		0	BRCA1	protein_coding
ENSG00000012048	mature-tRNA-Glu-CTC_5_end_2	ENSG00000012048|ENST00000492859	155	-25.93	2	29	550	577	28	0.6429	0.6786	ENSG00000012048|ENST00000492859	mature-tRNA-Glu-CTC_5_end_2	0	51	56	51	56	6812	6mer	x	6mer	0		0	BRCA1	protein_coding
ENSG00000012048	mature-tRNA-Glu-CTC_5_end_3	ENSG00000012048|ENST00000492859	155	-25.93	2	29	549	577	28	0.6429	0.6786	ENSG00000012048|ENST00000492859	mature-tRNA-Glu-CTC_5_end_3	0	51	56	51	56	6813	6mer	x	6mer	0		0	BRCA1	protein_coding
ENSG00000012048	mature-tRNA-Glu-CTC_5_end_4	ENSG00000012048|ENST00000492859	155	-25.93	2	29	547	577	28	0.6429	0.6786	ENSG00000012048|ENST00000492859	mature-tRNA-Glu-CTC_5_end_4	0	51	56	51	56	6814	6mer	x	6mer	0		0	BRCA1	protein_coding
ENSG00000136521	mature-tRNA-Gly-GCC_5_end_5	ENSG00000136521|ENST00000493866	168	-21.9	2	26	1797	1829	25	0.64	0.8	ENSG00000136521|ENST00000493866	mature-tRNA-Gly-GCC_5_end_5	0	54	60	54	60	6816	7mer-m8	x	7mer-m8	0		0	NDUFB5	protein_coding
ENSG00000198464	mature-tRNA-Gly-GCC_5_end_5	ENSG00000198464|ENST00000490272	173	-24.14	2	29	724	761	33	0.697	0.7273	ENSG00000198464|ENST00000490272	mature-tRNA-Gly-GCC_5_end_5	0	30	36	30	36	6819	7mer-m8	x	7mer-m8	0		0	ZNF480	protein_coding
ENSG00000158865	mature-tRNA-Glu-CTC_5_end_1	ENSG00000158865|ENST00000488922	173	-39.68	2	32	1310	1344	32	0.625	0.75	ENSG00000158865|ENST00000488922	mature-tRNA-Glu-CTC_5_end_1	0	35	40	35	40	6828	6mer	x	6mer	0		0	SLC5A11	protein_coding
ENSG00000169764	mature-tRNA-Glu-CTC_5_end_1	ENSG00000169764|ENST00000493222	151	-29.99	2	27	337	371	28	0.6071	0.6786	ENSG00000169764|ENST00000493222	mature-tRNA-Glu-CTC_5_end_1	0	45	51	45	51	6851	7mer-1a	x	7mer-1a	0		0	UGP2	protein_coding
ENSG00000100483	mature-tRNA-Glu-CTC_5_end_1	ENSG00000100483|ENST00000491402	167	-32.16	2	30	366	397	28	0.6071	0.75	ENSG00000100483|ENST00000491402	mature-tRNA-Glu-CTC_5_end_1	0	55	60	55	60	6855	6mer	x	6mer	0		0	VCPKMT	protein_coding
ENSG00000100483	mature-tRNA-Glu-CTC_5_end_2	ENSG00000100483|ENST00000491402	170	-35.99	2	29	369	397	27	0.6296	0.7778	ENSG00000100483|ENST00000491402	mature-tRNA-Glu-CTC_5_end_2	0	55	60	55	60	6856	6mer	x	6mer	0		0	VCPKMT	protein_coding
ENSG00000100483	mature-tRNA-Glu-CTC_5_end_3	ENSG00000100483|ENST00000491402	175	-35.99	2	30	368	397	28	0.6429	0.7857	ENSG00000100483|ENST00000491402	mature-tRNA-Glu-CTC_5_end_3	0	55	60	55	60	6857	6mer	x	6mer	0		0	VCPKMT	protein_coding
ENSG00000100483	mature-tRNA-Glu-CTC_5_end_4	ENSG00000100483|ENST00000491402	175	-35.99	2	30	366	397	28	0.6429	0.7857	ENSG00000100483|ENST00000491402	mature-tRNA-Glu-CTC_5_end_4	0	55	60	55	60	6858	6mer	x	6mer	0		0	VCPKMT	protein_coding
ENSG00000177646	mature-tRNA-Gly-CCC_5_end_1	ENSG00000177646|ENST00000505192	146	-22.01	2	27	952	985	30	0.6333	0.6667	ENSG00000177646|ENST00000505192	mature-tRNA-Gly-CCC_5_end_1	0	54	59	54	59	6873	6mer	x	6mer	0		0	ACAD9	protein_coding
ENSG00000177646	mature-tRNA-Gly-GCC_5_end_1	ENSG00000177646|ENST00000505192	146	-22.01	2	27	951	985	30	0.6333	0.6667	ENSG00000177646|ENST00000505192	mature-tRNA-Gly-GCC_5_end_1	0	54	59	54	59	6874	6mer	x	6mer	0		0	ACAD9	protein_coding
ENSG00000177646	mature-tRNA-Gly-GCC_5_end_2	ENSG00000177646|ENST00000505192	146	-22.01	2	27	949	985	30	0.6333	0.6667	ENSG00000177646|ENST00000505192	mature-tRNA-Gly-GCC_5_end_2	0	54	59	54	59	6875	6mer	x	6mer	0		0	ACAD9	protein_coding
ENSG00000177646	mature-tRNA-Gly-GCC_5_end_3	ENSG00000177646|ENST00000505192	146	-22.01	2	27	948	985	30	0.6333	0.6667	ENSG00000177646|ENST00000505192	mature-tRNA-Gly-GCC_5_end_3	0	54	59	54	59	6876	6mer	x	6mer	0		0	ACAD9	protein_coding
ENSG00000177646	mature-tRNA-Gly-GCC_5_end_4	ENSG00000177646|ENST00000505192	146	-22.04	2	27	947	985	30	0.6333	0.6667	ENSG00000177646|ENST00000505192	mature-tRNA-Gly-GCC_5_end_4	0	54	59	54	59	6877	6mer	x	6mer	0		0	ACAD9	protein_coding
ENSG00000137177	mature-tRNA-Gly-GCC_5_end_5	ENSG00000137177|ENST00000502704	164	-18.55	2	31	778	814	34	0.5882	0.7059	ENSG00000137177|ENST00000502704	mature-tRNA-Gly-GCC_5_end_5	0	47	52	47	52	6922	6mer	x	6mer	0		0	KIF13A	protein_coding
ENSG00000188921	mature-tRNA-Glu-TTC_5_end_1	ENSG00000188921|ENST00000495827	163	-25.19	2	27	995	1033	31	0.6452	0.7419	ENSG00000188921|ENST00000495827	mature-tRNA-Glu-TTC_5_end_1	0	45	51	45	51	6943	7mer-1a	x	7mer-1a	0		0	HACD4	protein_coding
ENSG00000112659	mature-tRNA-Glu-CTC_5_end_1	ENSG00000112659|ENST00000506830	176	-39.64	2	31	187	218	29	0.6207	0.7931	ENSG00000112659|ENST00000506830	mature-tRNA-Glu-CTC_5_end_1	0	18	23	18	23	6944	6mer	x	6mer	0		0	CUL9	protein_coding
ENSG00000204136	mature-tRNA-Glu-TTC_5_end_1	ENSG00000204136|ENST00000495328	170	-26.05	2	32	1847	1876	30	0.6	0.8	ENSG00000204136|ENST00000495328	mature-tRNA-Glu-TTC_5_end_1	0	27	34	27	34	6976	8mer-1a	x	8mer-1a	0		0	GGTA1	protein_coding
ENSG00000204427	mature-tRNA-Glu-CTC_5_end_1	ENSG00000204427|ENST00000495769	154	-30.88	2	32	966	995	30	0.5333	0.7333	ENSG00000204427|ENST00000495769	mature-tRNA-Glu-CTC_5_end_1	0	30	36	30	36	6995	7mer-1a	x	7mer-1a	0		0	ABHD16A	protein_coding
ENSG00000204427	mature-tRNA-Glu-CTC_5_end_2	ENSG00000204427|ENST00000495769	154	-26.44	2	29	968	995	28	0.5714	0.7857	ENSG00000204427|ENST00000495769	mature-tRNA-Glu-CTC_5_end_2	0	30	36	30	36	6996	7mer-1a	x	7mer-1a	0		0	ABHD16A	protein_coding
ENSG00000204427	mature-tRNA-Glu-CTC_5_end_3	ENSG00000204427|ENST00000495769	154	-30.3	2	29	967	995	28	0.5714	0.7857	ENSG00000204427|ENST00000495769	mature-tRNA-Glu-CTC_5_end_3	0	30	36	30	36	6997	7mer-1a	x	7mer-1a	0		0	ABHD16A	protein_coding
ENSG00000204427	mature-tRNA-Glu-CTC_5_end_4	ENSG00000204427|ENST00000495769	155	-30.57	2	32	966	995	31	0.5806	0.7742	ENSG00000204427|ENST00000495769	mature-tRNA-Glu-CTC_5_end_4	0	30	36	30	36	6998	7mer-1a	x	7mer-1a	0		0	ABHD16A	protein_coding
ENSG00000163608	mature-tRNA-Gly-GCC_5_end_5	ENSG00000163608|ENST00000496206	152	-13.37	2	28	267	299	28	0.5714	0.7143	ENSG00000163608|ENST00000496206	mature-tRNA-Gly-GCC_5_end_5	0	24	30	24	30	7021	7mer-1a	x	7mer-1a	0		0	NEPRO	protein_coding
ENSG00000163626	mature-tRNA-Gly-GCC_5_end_5	ENSG00000163626|ENST00000507544	160	-20.4	2	31	2392	2427	33	0.6061	0.6667	ENSG00000163626|ENST00000507544	mature-tRNA-Gly-GCC_5_end_5	0	36	43	36	43	7034	8mer-1a	x	8mer-1a	0		0	COX18	protein_coding
ENSG00000198721	mature-tRNA-Gly-GCC_5_end_5	ENSG00000198721|ENST00000496241	179	-33.85	2	31	672	706	32	0.6875	0.7812	ENSG00000198721|ENST00000496241	mature-tRNA-Gly-GCC_5_end_5	0	25	30	25	30	7061	6mer	x	6mer	0		0	ECI2	protein_coding
ENSG00000135297	mature-tRNA-Gly-GCC_5_end_5	ENSG00000135297|ENST00000498286	160	-18.55	2	25	5194	5225	23	0.5652	0.7826	ENSG00000135297|ENST00000498286	mature-tRNA-Gly-GCC_5_end_5	0	15	22	15	22	7081	8mer-1a	x	8mer-1a	0		0	MTO1	protein_coding
ENSG00000177646	mature-tRNA-Gly-CCC_5_end_1	ENSG00000177646|ENST00000505867	146	-22.01	2	27	1056	1089	30	0.6333	0.6667	ENSG00000177646|ENST00000505867	mature-tRNA-Gly-CCC_5_end_1	0	54	60	54	60	7088	7mer-1a	x	7mer-1a	0		0	ACAD9	protein_coding
ENSG00000177646	mature-tRNA-Gly-GCC_5_end_1	ENSG00000177646|ENST00000505867	146	-22.01	2	27	1055	1089	30	0.6333	0.6667	ENSG00000177646|ENST00000505867	mature-tRNA-Gly-GCC_5_end_1	0	54	60	54	60	7089	7mer-1a	x	7mer-1a	0		0	ACAD9	protein_coding
ENSG00000177646	mature-tRNA-Gly-GCC_5_end_2	ENSG00000177646|ENST00000505867	146	-22.01	2	27	1053	1089	30	0.6333	0.6667	ENSG00000177646|ENST00000505867	mature-tRNA-Gly-GCC_5_end_2	0	54	60	54	60	7090	7mer-1a	x	7mer-1a	0		0	ACAD9	protein_coding
ENSG00000177646	mature-tRNA-Gly-GCC_5_end_3	ENSG00000177646|ENST00000505867	146	-22.01	2	27	1052	1089	30	0.6333	0.6667	ENSG00000177646|ENST00000505867	mature-tRNA-Gly-GCC_5_end_3	0	54	60	54	60	7091	7mer-1a	x	7mer-1a	0		0	ACAD9	protein_coding
ENSG00000177646	mature-tRNA-Gly-GCC_5_end_4	ENSG00000177646|ENST00000505867	146	-22.04	2	27	1051	1089	30	0.6333	0.6667	ENSG00000177646|ENST00000505867	mature-tRNA-Gly-GCC_5_end_4	0	54	60	54	60	7092	7mer-1a	x	7mer-1a	0		0	ACAD9	protein_coding
ENSG00000062194	mature-tRNA-Glu-CTC_5_end_1	ENSG00000062194|ENST00000506184	141	-24.55	2	31	675	708	30	0.4	0.7	ENSG00000062194|ENST00000506184	mature-tRNA-Glu-CTC_5_end_1	0	44	49	44	49	7124	6mer	x	6mer	0		0	GPBP1	protein_coding
ENSG00000062194	mature-tRNA-Glu-CTC_5_end_2	ENSG00000062194|ENST00000506184	140	-20.33	2	9	679	708	7	1	1	ENSG00000062194|ENST00000506184	mature-tRNA-Glu-CTC_5_end_2	0	44	49	44	49	7125	6mer	x	6mer	0		0	GPBP1	protein_coding
ENSG00000062194	mature-tRNA-Glu-CTC_5_end_3	ENSG00000062194|ENST00000506184	140	-21.62	2	9	678	708	7	1	1	ENSG00000062194|ENST00000506184	mature-tRNA-Glu-CTC_5_end_3	0	44	49	44	49	7126	6mer	x	6mer	0		0	GPBP1	protein_coding
ENSG00000062194	mature-tRNA-Glu-CTC_5_end_4	ENSG00000062194|ENST00000506184	141	-21.86	2	31	675	708	30	0.4	0.7	ENSG00000062194|ENST00000506184	mature-tRNA-Glu-CTC_5_end_4	0	44	49	44	49	7127	6mer	x	6mer	0		0	GPBP1	protein_coding
ENSG00000141582	mature-tRNA-Glu-CTC_5_end_1	ENSG00000141582|ENST00000495122	160	-34.76	2	31	35	71	33	0.5152	0.7576	ENSG00000141582|ENST00000495122	mature-tRNA-Glu-CTC_5_end_1	0	34	39	34	39	7142	6mer	x	6mer	0		0	CBX4	protein_coding
ENSG00000284461	mature-tRNA-Gly-GCC_5_end_5	ENSG00000284461|ENST00000503687	157	-15.4	2	28	1725	1760	30	0.5667	0.7333	ENSG00000284461|ENST00000503687	mature-tRNA-Gly-GCC_5_end_5	0	26	32	26	32	7209	7mer-m8	x	7mer-m8	0		0	AC027644.4	protein_coding
ENSG00000124313	mature-tRNA-Glu-TTC_5_end_1	ENSG00000124313|ENST00000498281	173	-36.62	2	31	9	42	32	0.6875	0.75	ENSG00000124313|ENST00000498281	mature-tRNA-Glu-TTC_5_end_1	0	48	53	48	53	7217	6mer	x	6mer	0		0	IQSEC2	protein_coding
ENSG00000178852	mature-tRNA-Glu-CTC_5_end_1	ENSG00000178852|ENST00000517484	163	-28.2	2	27	333	363	25	0.64	0.76	ENSG00000178852|ENST00000517484	mature-tRNA-Glu-CTC_5_end_1	0	55	60	55	60	7219	6mer	x	6mer	0		0	EFCAB13	protein_coding
ENSG00000178852	mature-tRNA-Glu-CTC_5_end_2	ENSG00000178852|ENST00000517484	159	-25.7	2	27	336	363	25	0.6	0.76	ENSG00000178852|ENST00000517484	mature-tRNA-Glu-CTC_5_end_2	0	55	60	55	60	7220	6mer	x	6mer	0		0	EFCAB13	protein_coding
ENSG00000178852	mature-tRNA-Glu-CTC_5_end_3	ENSG00000178852|ENST00000517484	159	-26.07	2	27	335	363	25	0.6	0.76	ENSG00000178852|ENST00000517484	mature-tRNA-Glu-CTC_5_end_3	0	55	60	55	60	7221	6mer	x	6mer	0		0	EFCAB13	protein_coding
ENSG00000178852	mature-tRNA-Glu-CTC_5_end_4	ENSG00000178852|ENST00000517484	159	-26.31	2	27	333	363	25	0.6	0.76	ENSG00000178852|ENST00000517484	mature-tRNA-Glu-CTC_5_end_4	0	55	60	55	60	7222	6mer	x	6mer	0		0	EFCAB13	protein_coding
ENSG00000184305	mature-tRNA-Glu-TTC_5_end_1	ENSG00000184305|ENST00000509176	160	-21.14	2	31	2462	2492	30	0.6333	0.7333	ENSG00000184305|ENST00000509176	mature-tRNA-Glu-TTC_5_end_1	0	33	40	33	40	7236	8mer-1a	x	8mer-1a	0		0	CCSER1	protein_coding
ENSG00000146021	mature-tRNA-Gly-GCC_5_end_5	ENSG00000146021|ENST00000508657	152	-13.41	2	27	630	660	25	0.6	0.68	ENSG00000146021|ENST00000508657	mature-tRNA-Gly-GCC_5_end_5	0	25	31	25	31	7256	7mer-m8	x	7mer-m8	0		0	KLHL3	protein_coding
ENSG00000170074	mature-tRNA-Glu-CTC_5_end_1	ENSG00000170074|ENST00000515787	141	-26.86	2	27	338	370	27	0.5556	0.7037	ENSG00000170074|ENST00000515787	mature-tRNA-Glu-CTC_5_end_1	0	49	55	49	55	7332	7mer-1a	x	7mer-1a	0		0	FAM153A	protein_coding
ENSG00000164620	mature-tRNA-Glu-CTC_5_end_1	ENSG00000164620|ENST00000518856	169	-38.96	2	32	12	46	32	0.5938	0.75	ENSG00000164620|ENST00000518856	mature-tRNA-Glu-CTC_5_end_1	0	46	52	46	52	7420	7mer-1a	x	7mer-1a	0		0	RELL2	protein_coding
ENSG00000113621	mature-tRNA-Gly-CCC_5_end_1	ENSG00000113621|ENST00000511070	163	-19.38	2	25	170	200	25	0.64	0.76	ENSG00000113621|ENST00000511070	mature-tRNA-Gly-CCC_5_end_1	0	33	38	33	38	7449	6mer	x	6mer	0		0	TXNDC15	protein_coding
ENSG00000113621	mature-tRNA-Gly-GCC_5_end_1	ENSG00000113621|ENST00000511070	163	-20.01	2	25	169	200	25	0.64	0.76	ENSG00000113621|ENST00000511070	mature-tRNA-Gly-GCC_5_end_1	0	33	38	33	38	7450	6mer	x	6mer	0		0	TXNDC15	protein_coding
ENSG00000113621	mature-tRNA-Gly-GCC_5_end_2	ENSG00000113621|ENST00000511070	163	-20.01	2	25	167	200	25	0.64	0.76	ENSG00000113621|ENST00000511070	mature-tRNA-Gly-GCC_5_end_2	0	33	38	33	38	7451	6mer	x	6mer	0		0	TXNDC15	protein_coding
ENSG00000113621	mature-tRNA-Gly-GCC_5_end_3	ENSG00000113621|ENST00000511070	163	-20.01	2	25	166	200	25	0.64	0.76	ENSG00000113621|ENST00000511070	mature-tRNA-Gly-GCC_5_end_3	0	33	38	33	38	7452	6mer	x	6mer	0		0	TXNDC15	protein_coding
ENSG00000113621	mature-tRNA-Gly-GCC_5_end_4	ENSG00000113621|ENST00000511070	163	-20.01	2	25	165	200	25	0.64	0.76	ENSG00000113621|ENST00000511070	mature-tRNA-Gly-GCC_5_end_4	0	33	38	33	38	7453	6mer	x	6mer	0		0	TXNDC15	protein_coding
ENSG00000188039	mature-tRNA-Gly-GCC_5_end_5	ENSG00000188039|ENST00000518676	160	-25.51	2	22	992	1024	21	0.619	0.8571	ENSG00000188039|ENST00000518676	mature-tRNA-Gly-GCC_5_end_5	0	51	56	51	56	7454	6mer	x	6mer	0		0	NWD1	protein_coding
ENSG00000169083	mature-tRNA-Glu-CTC_5_end_1	ENSG00000169083|ENST00000514029	148	-28.64	2	28	1324	1354	26	0.5385	0.6923	ENSG00000169083|ENST00000514029	mature-tRNA-Glu-CTC_5_end_1	0	35	40	35	40	7494	6mer	x	6mer	0		0	AR	protein_coding
ENSG00000103599	mature-tRNA-Gly-GCC_5_end_5	ENSG00000103599|ENST00000514049	177	-22.5	2	28	2761	2794	28	0.6786	0.8214	ENSG00000103599|ENST00000514049	mature-tRNA-Gly-GCC_5_end_5	0	25	31	25	31	7553	7mer-m8	x	7mer-m8	0		0	IQCH	protein_coding
ENSG00000007202	mature-tRNA-Glu-CTC_5_end_1	ENSG00000007202|ENST00000528896	151	-26.33	2	18	496	527	16	0.75	0.8125	ENSG00000007202|ENST00000528896	mature-tRNA-Glu-CTC_5_end_1	0	41	46	41	46	7586	6mer	x	6mer	0		0	KIAA0100	protein_coding
ENSG00000198561	mature-tRNA-Glu-TTC_5_end_1	ENSG00000198561|ENST00000525902	147	-20.19	2	27	2116	2146	25	0.52	0.72	ENSG00000198561|ENST00000525902	mature-tRNA-Glu-TTC_5_end_1	0	27	33	27	33	7590	7mer-1a	x	7mer-1a	0		0	CTNND1	protein_coding
ENSG00000150764	mature-tRNA-Gly-GCC_5_end_5	ENSG00000150764|ENST00000529225	157	-29.47	2	31	178	209	31	0.5484	0.7742	ENSG00000150764|ENST00000529225	mature-tRNA-Gly-GCC_5_end_5	0	40	46	40	46	7612	7mer-m8	x	7mer-m8	0		0	DIXDC1	protein_coding
ENSG00000147642	mature-tRNA-Glu-TTC_5_end_1	ENSG00000147642|ENST00000528647	155	-29.07	2	28	13	43	26	0.6154	0.7308	ENSG00000147642|ENST00000528647	mature-tRNA-Glu-TTC_5_end_1	0	24	30	24	30	7625	7mer-m8	x	7mer-m8	0		0	SYBU	protein_coding
ENSG00000173039	mature-tRNA-Glu-CTC_5_end_1	ENSG00000173039|ENST00000525693	175	-32.99	2	32	964	996	30	0.5667	0.7667	ENSG00000173039|ENST00000525693	mature-tRNA-Glu-CTC_5_end_1	0	37	43	37	43	7626	7mer-m8	x	7mer-m8	0		0	RELA	protein_coding
ENSG00000173039	mature-tRNA-Glu-CTC_5_end_2	ENSG00000173039|ENST00000525693	168	-32.02	2	29	967	996	27	0.5556	0.7778	ENSG00000173039|ENST00000525693	mature-tRNA-Glu-CTC_5_end_2	0	37	43	37	43	7627	7mer-m8	x	7mer-m8	0		0	RELA	protein_coding
ENSG00000173039	mature-tRNA-Glu-CTC_5_end_3	ENSG00000173039|ENST00000525693	173	-32.02	2	30	966	996	28	0.5714	0.7857	ENSG00000173039|ENST00000525693	mature-tRNA-Glu-CTC_5_end_3	0	37	43	37	43	7628	7mer-m8	x	7mer-m8	0		0	RELA	protein_coding
ENSG00000173039	mature-tRNA-Glu-CTC_5_end_4	ENSG00000173039|ENST00000525693	175	-32.54	2	32	964	996	30	0.5667	0.7667	ENSG00000173039|ENST00000525693	mature-tRNA-Glu-CTC_5_end_4	0	37	43	37	43	7629	7mer-m8	x	7mer-m8	0		0	RELA	protein_coding
ENSG00000166833	mature-tRNA-Glu-TTC_5_end_1	ENSG00000166833|ENST00000527559	174	-34.79	2	30	1104	1132	28	0.7143	0.8214	ENSG00000166833|ENST00000527559	mature-tRNA-Glu-TTC_5_end_1	0	23	30	23	30	7741	8mer-1a	x	8mer-1a	0		0	NAV2	protein_coding
ENSG00000184489	mature-tRNA-Glu-CTC_5_end_1	ENSG00000184489|ENST00000521578	159	-32.74	2	31	951	981	29	0.5517	0.7241	ENSG00000184489|ENST00000521578	mature-tRNA-Glu-CTC_5_end_1	0	18	23	18	23	7771	6mer	x	6mer	0		0	PTP4A3	protein_coding
ENSG00000184489	mature-tRNA-Glu-CTC_5_end_2	ENSG00000184489|ENST00000521578	146	-29.36	2	29	948	981	31	0.4516	0.7419	ENSG00000184489|ENST00000521578	mature-tRNA-Glu-CTC_5_end_2	0	18	23	18	23	7772	6mer	x	6mer	0		0	PTP4A3	protein_coding
ENSG00000184489	mature-tRNA-Glu-CTC_5_end_3	ENSG00000184489|ENST00000521578	151	-29.89	2	30	947	981	32	0.4688	0.75	ENSG00000184489|ENST00000521578	mature-tRNA-Glu-CTC_5_end_3	0	18	23	18	23	7773	6mer	x	6mer	0		0	PTP4A3	protein_coding
ENSG00000184489	mature-tRNA-Glu-CTC_5_end_4	ENSG00000184489|ENST00000521578	155	-30.98	2	31	951	981	29	0.5172	0.7241	ENSG00000184489|ENST00000521578	mature-tRNA-Glu-CTC_5_end_4	0	18	23	18	23	7774	6mer	x	6mer	0		0	PTP4A3	protein_coding
ENSG00000168487	mature-tRNA-Glu-CTC_5_end_1	ENSG00000168487|ENST00000520626	160	-33.14	2	32	4020	4057	35	0.5714	0.7143	ENSG00000168487|ENST00000520626	mature-tRNA-Glu-CTC_5_end_1	0	16	21	16	21	7807	6mer	x	6mer	0		0	BMP1	protein_coding
ENSG00000168487	mature-tRNA-Glu-CTC_5_end_2	ENSG00000168487|ENST00000520626	159	-30.46	2	22	4026	4057	22	0.6818	0.8182	ENSG00000168487|ENST00000520626	mature-tRNA-Glu-CTC_5_end_2	0	16	21	16	21	7808	6mer	x	6mer	0		0	BMP1	protein_coding
ENSG00000168487	mature-tRNA-Glu-CTC_5_end_3	ENSG00000168487|ENST00000520626	159	-30.63	2	22	4025	4057	22	0.6818	0.8182	ENSG00000168487|ENST00000520626	mature-tRNA-Glu-CTC_5_end_3	0	16	21	16	21	7809	6mer	x	6mer	0		0	BMP1	protein_coding
ENSG00000168487	mature-tRNA-Glu-CTC_5_end_4	ENSG00000168487|ENST00000520626	160	-32.17	2	32	4020	4057	35	0.5714	0.7143	ENSG00000168487|ENST00000520626	mature-tRNA-Glu-CTC_5_end_4	0	16	21	16	21	7810	6mer	x	6mer	0		0	BMP1	protein_coding
ENSG00000152402	mature-tRNA-Gly-GCC_5_end_5	ENSG00000152402|ENST00000526355	157	-15.69	2	26	10682	10710	24	0.625	0.75	ENSG00000152402|ENST00000526355	mature-tRNA-Gly-GCC_5_end_5	0	53	58	53	58	7830	6mer	x	6mer	0		0	GUCY1A2	protein_coding
ENSG00000162241	mature-tRNA-Glu-CTC_5_end_1	ENSG00000162241|ENST00000526898	163	-35.05	2	29	436	469	28	0.6071	0.7143	ENSG00000162241|ENST00000526898	mature-tRNA-Glu-CTC_5_end_1	0	46	51	46	51	7880	6mer	x	6mer	0		0	SLC25A45	protein_coding
ENSG00000162241	mature-tRNA-Glu-CTC_5_end_2	ENSG00000162241|ENST00000526898	153	-28.83	2	28	464	492	26	0.5769	0.6923	ENSG00000162241|ENST00000526898	mature-tRNA-Glu-CTC_5_end_2	0	46	51	46	51	7881	6mer	x	6mer	0		0	SLC25A45	protein_coding
ENSG00000162241	mature-tRNA-Glu-CTC_5_end_3	ENSG00000162241|ENST00000526898	153	-29.77	2	28	463	492	26	0.5769	0.6923	ENSG00000162241|ENST00000526898	mature-tRNA-Glu-CTC_5_end_3	0	46	51	46	51	7882	6mer	x	6mer	0		0	SLC25A45	protein_coding
ENSG00000162241	mature-tRNA-Glu-CTC_5_end_4	ENSG00000162241|ENST00000526898	155	-33.49	2	31	459	492	31	0.5806	0.6774	ENSG00000162241|ENST00000526898	mature-tRNA-Glu-CTC_5_end_4	0	46	51	46	51	7883	6mer	x	6mer	0		0	SLC25A45	protein_coding
ENSG00000102878	mature-tRNA-Glu-CTC_5_end_1	ENSG00000102878|ENST00000521314	169	-33.41	2	30	491	523	28	0.5357	0.7857	ENSG00000102878|ENST00000521314	mature-tRNA-Glu-CTC_5_end_1	0	47	53	47	53	7885	7mer-1a	x	7mer-1a	0		0	HSF4	protein_coding
ENSG00000102878	mature-tRNA-Glu-CTC_5_end_2	ENSG00000102878|ENST00000521314	167	-25.67	2	28	779	807	27	0.7037	0.7407	ENSG00000102878|ENST00000521314	mature-tRNA-Glu-CTC_5_end_2	0	47	53	47	53	7886	7mer-1a	x	7mer-1a	0		0	HSF4	protein_coding
ENSG00000102878	mature-tRNA-Glu-CTC_5_end_3	ENSG00000102878|ENST00000521314	167	-25.67	2	28	778	807	27	0.7037	0.7407	ENSG00000102878|ENST00000521314	mature-tRNA-Glu-CTC_5_end_3	0	47	53	47	53	7887	7mer-1a	x	7mer-1a	0		0	HSF4	protein_coding
ENSG00000102878	mature-tRNA-Glu-CTC_5_end_4	ENSG00000102878|ENST00000521314	167	-27.78	2	28	776	807	27	0.7037	0.7407	ENSG00000102878|ENST00000521314	mature-tRNA-Glu-CTC_5_end_4	0	47	53	47	53	7888	7mer-1a	x	7mer-1a	0		0	HSF4	protein_coding
ENSG00000164733	mature-tRNA-Glu-TTC_5_end_1	ENSG00000164733|ENST00000526195	168	-29.35	2	19	546	577	17	0.8235	0.9412	ENSG00000164733|ENST00000526195	mature-tRNA-Glu-TTC_5_end_1	0	54	59	54	59	7889	6mer	x	6mer	0		0	CTSB	protein_coding
ENSG00000148926	mature-tRNA-Glu-CTC_5_end_1	ENSG00000148926|ENST00000528655	167	-31.51	2	30	332	368	32	0.625	0.7188	ENSG00000148926|ENST00000528655	mature-tRNA-Glu-CTC_5_end_1	0	25	30	25	30	7890	6mer	x	6mer	0		0	ADM	protein_coding
ENSG00000148926	mature-tRNA-Glu-CTC_5_end_2	ENSG00000148926|ENST00000528655	162	-31.56	2	29	335	368	31	0.6129	0.7097	ENSG00000148926|ENST00000528655	mature-tRNA-Glu-CTC_5_end_2	0	25	30	25	30	7891	6mer	x	6mer	0		0	ADM	protein_coding
ENSG00000148926	mature-tRNA-Glu-CTC_5_end_3	ENSG00000148926|ENST00000528655	167	-31.56	2	30	334	368	32	0.625	0.7188	ENSG00000148926|ENST00000528655	mature-tRNA-Glu-CTC_5_end_3	0	25	30	25	30	7892	6mer	x	6mer	0		0	ADM	protein_coding
ENSG00000148926	mature-tRNA-Glu-CTC_5_end_4	ENSG00000148926|ENST00000528655	167	-31.56	2	30	332	368	32	0.625	0.7188	ENSG00000148926|ENST00000528655	mature-tRNA-Glu-CTC_5_end_4	0	25	30	25	30	7893	6mer	x	6mer	0		0	ADM	protein_coding
ENSG00000149115	mature-tRNA-Gly-CCC_5_end_1	ENSG00000149115|ENST00000528882	156	-19.76	2	21	3354	3382	19	0.6842	0.7368	ENSG00000149115|ENST00000528882	mature-tRNA-Gly-CCC_5_end_1	0	29	35	29	35	7926	7mer-1a	x	7mer-1a	0		0	TNKS1BP1	protein_coding
ENSG00000149115	mature-tRNA-Gly-GCC_5_end_1	ENSG00000149115|ENST00000528882	158	-20.64	2	30	3354	3382	28	0.6071	0.6786	ENSG00000149115|ENST00000528882	mature-tRNA-Gly-GCC_5_end_1	0	29	35	29	35	7927	7mer-1a	x	7mer-1a	0		0	TNKS1BP1	protein_coding
ENSG00000149115	mature-tRNA-Gly-GCC_5_end_2	ENSG00000149115|ENST00000528882	159	-20.64	2	31	3355	3382	29	0.6552	0.7241	ENSG00000149115|ENST00000528882	mature-tRNA-Gly-GCC_5_end_2	0	29	35	29	35	7928	7mer-1a	x	7mer-1a	0		0	TNKS1BP1	protein_coding
ENSG00000149115	mature-tRNA-Gly-GCC_5_end_3	ENSG00000149115|ENST00000528882	159	-23.46	2	31	3354	3382	29	0.6552	0.7241	ENSG00000149115|ENST00000528882	mature-tRNA-Gly-GCC_5_end_3	0	29	35	29	35	7929	7mer-1a	x	7mer-1a	0		0	TNKS1BP1	protein_coding
ENSG00000149115	mature-tRNA-Gly-GCC_5_end_4	ENSG00000149115|ENST00000528882	159	-23.73	2	31	3353	3382	29	0.6552	0.7241	ENSG00000149115|ENST00000528882	mature-tRNA-Gly-GCC_5_end_4	0	29	35	29	35	7930	7mer-1a	x	7mer-1a	0		0	TNKS1BP1	protein_coding
ENSG00000116299	mature-tRNA-Glu-TTC_5_end_1	ENSG00000116299|ENST00000527996	153	-29.56	2	24	1449	1487	28	0.6429	0.6786	ENSG00000116299|ENST00000527996	mature-tRNA-Glu-TTC_5_end_1	0	24	29	24	29	7931	6mer	x	6mer	0		0	ELAPOR1	protein_coding
ENSG00000104408	mature-tRNA-Glu-CTC_5_end_1	ENSG00000104408|ENST00000522887	154	-28.52	2	21	269	300	19	0.6842	0.7895	ENSG00000104408|ENST00000522887	mature-tRNA-Glu-CTC_5_end_1	0	32	37	32	37	7939	6mer	x	6mer	0		0	EIF3E	protein_coding
ENSG00000104408	mature-tRNA-Glu-CTC_5_end_2	ENSG00000104408|ENST00000522887	154	-24.21	2	21	272	300	19	0.6842	0.7895	ENSG00000104408|ENST00000522887	mature-tRNA-Glu-CTC_5_end_2	0	32	37	32	37	7940	6mer	x	6mer	0		0	EIF3E	protein_coding
ENSG00000104408	mature-tRNA-Glu-CTC_5_end_3	ENSG00000104408|ENST00000522887	154	-25.34	2	21	271	300	19	0.6842	0.7895	ENSG00000104408|ENST00000522887	mature-tRNA-Glu-CTC_5_end_3	0	32	37	32	37	7941	6mer	x	6mer	0		0	EIF3E	protein_coding
ENSG00000104408	mature-tRNA-Glu-CTC_5_end_4	ENSG00000104408|ENST00000522887	154	-26.23	2	21	269	300	19	0.6842	0.7895	ENSG00000104408|ENST00000522887	mature-tRNA-Glu-CTC_5_end_4	0	32	37	32	37	7942	6mer	x	6mer	0		0	EIF3E	protein_coding
ENSG00000198561	mature-tRNA-Glu-TTC_5_end_1	ENSG00000198561|ENST00000528621	147	-20.19	2	27	2116	2146	25	0.52	0.72	ENSG00000198561|ENST00000528621	mature-tRNA-Glu-TTC_5_end_1	0	40	45	40	45	7976	6mer	x	6mer	0		0	CTNND1	protein_coding
ENSG00000102225	mature-tRNA-Glu-CTC_5_end_1	ENSG00000102225|ENST00000523344	167	-35.83	2	32	320	353	32	0.6562	0.7188	ENSG00000102225|ENST00000523344	mature-tRNA-Glu-CTC_5_end_1	0	23	30	23	30	7978	8mer-1a	x	8mer-1a	0		0	CDK16	protein_coding
ENSG00000164794	mature-tRNA-Glu-CTC_5_end_1	ENSG00000164794|ENST00000524391	155	-28.92	2	27	1308	1340	26	0.6154	0.7308	ENSG00000164794|ENST00000524391	mature-tRNA-Glu-CTC_5_end_1	0	45	51	45	51	7983	7mer-1a	x	7mer-1a	0		0	KCNV1	protein_coding
ENSG00000138050	mature-tRNA-Gly-GCC_5_end_5	ENSG00000138050|ENST00000530522	155	-12.74	2	28	134	162	26	0.6154	0.6923	ENSG00000138050|ENST00000530522	mature-tRNA-Gly-GCC_5_end_5	0	15	20	15	20	8008	6mer	x	6mer	0		0	THUMPD2	protein_coding
ENSG00000183354	mature-tRNA-Gly-GCC_5_end_5	ENSG00000183354|ENST00000540714	187	-24.6	2	29	2957	2989	28	0.7143	0.8214	ENSG00000183354|ENST00000540714	mature-tRNA-Gly-GCC_5_end_5	0	48	53	48	53	8009	6mer	x	6mer	0		0	KIAA2026	protein_coding
ENSG00000168329	mature-tRNA-Gly-GCC_5_end_5	ENSG00000168329|ENST00000541347	165	-22.18	2	25	649	680	24	0.7083	0.7917	ENSG00000168329|ENST00000541347	mature-tRNA-Gly-GCC_5_end_5	0	22	28	22	28	8070	7mer-m8	x	7mer-m8	0		0	CX3CR1	protein_coding
ENSG00000117620	mature-tRNA-Gly-GCC_5_end_5	ENSG00000117620|ENST00000533028	155	-14.33	2	29	3412	3440	27	0.6296	0.7037	ENSG00000117620|ENST00000533028	mature-tRNA-Gly-GCC_5_end_5	0	25	31	25	31	8105	7mer-m8	x	7mer-m8	0		0	SLC35A3	protein_coding
ENSG00000133112	mature-tRNA-Glu-TTC_5_end_1	ENSG00000133112|ENST00000530705	143	-18.79	2	17	833	867	17	0.7059	0.7059	ENSG00000133112|ENST00000530705	mature-tRNA-Glu-TTC_5_end_1	0	45	50	45	50	8106	6mer	x	6mer	0		0	TPT1	protein_coding
ENSG00000179636	mature-tRNA-Glu-CTC_5_end_1	ENSG00000179636|ENST00000530140	159	-34.27	2	32	26	57	31	0.5806	0.7097	ENSG00000179636|ENST00000530140	mature-tRNA-Glu-CTC_5_end_1	0	27	33	27	33	8176	7mer-1a	x	7mer-1a	0		0	TPPP2	protein_coding
ENSG00000179636	mature-tRNA-Glu-CTC_5_end_2	ENSG00000179636|ENST00000530140	158	-32.12	2	29	29	57	27	0.5556	0.7407	ENSG00000179636|ENST00000530140	mature-tRNA-Glu-CTC_5_end_2	0	27	33	27	33	8177	7mer-1a	x	7mer-1a	0		0	TPPP2	protein_coding
ENSG00000179636	mature-tRNA-Glu-CTC_5_end_3	ENSG00000179636|ENST00000530140	163	-32.12	2	30	28	57	28	0.5714	0.75	ENSG00000179636|ENST00000530140	mature-tRNA-Glu-CTC_5_end_3	0	27	33	27	33	8178	7mer-1a	x	7mer-1a	0		0	TPPP2	protein_coding
ENSG00000179636	mature-tRNA-Glu-CTC_5_end_4	ENSG00000179636|ENST00000530140	165	-34.27	2	32	26	57	30	0.5667	0.7333	ENSG00000179636|ENST00000530140	mature-tRNA-Glu-CTC_5_end_4	0	27	33	27	33	8179	7mer-1a	x	7mer-1a	0		0	TPPP2	protein_coding
ENSG00000051825	mature-tRNA-Glu-CTC_5_end_1	ENSG00000051825|ENST00000541076	153	-32.72	2	24	1387	1425	28	0.6071	0.7143	ENSG00000051825|ENST00000541076	mature-tRNA-Glu-CTC_5_end_1	0	15	21	15	21	8183	7mer-1a	x	7mer-1a	0		0	MPHOSPH9	protein_coding
ENSG00000132746	mature-tRNA-Glu-CTC_5_end_1	ENSG00000132746|ENST00000530069	160	-31.98	2	31	118	153	32	0.5938	0.6875	ENSG00000132746|ENST00000530069	mature-tRNA-Glu-CTC_5_end_1	0	36	41	36	41	8222	6mer	x	6mer	0		0	ALDH3B2	protein_coding
ENSG00000048028	mature-tRNA-Gly-GCC_5_end_5	ENSG00000048028|ENST00000540438	164	-16.63	2	24	1827	1856	22	0.6818	0.8182	ENSG00000048028|ENST00000540438	mature-tRNA-Gly-GCC_5_end_5	0	18	24	18	24	8265	7mer-m8	x	7mer-m8	0		0	USP28	protein_coding
ENSG00000149532	mature-tRNA-Glu-CTC_5_end_1	ENSG00000149532|ENST00000537162	157	-28.94	2	29	172	202	27	0.5926	0.7037	ENSG00000149532|ENST00000537162	mature-tRNA-Glu-CTC_5_end_1	0	43	49	43	49	8280	7mer-1a	x	7mer-1a	0		0	CPSF7	protein_coding
ENSG00000149532	mature-tRNA-Glu-CTC_5_end_2	ENSG00000149532|ENST00000537162	157	-26.37	2	29	175	202	27	0.5926	0.7037	ENSG00000149532|ENST00000537162	mature-tRNA-Glu-CTC_5_end_2	0	43	49	43	49	8281	7mer-1a	x	7mer-1a	0		0	CPSF7	protein_coding
ENSG00000149532	mature-tRNA-Glu-CTC_5_end_3	ENSG00000149532|ENST00000537162	157	-27	2	29	174	202	27	0.5926	0.7037	ENSG00000149532|ENST00000537162	mature-tRNA-Glu-CTC_5_end_3	0	43	49	43	49	8282	7mer-1a	x	7mer-1a	0		0	CPSF7	protein_coding
ENSG00000149532	mature-tRNA-Glu-CTC_5_end_4	ENSG00000149532|ENST00000537162	158	-31.86	2	32	166	202	34	0.5	0.7059	ENSG00000149532|ENST00000537162	mature-tRNA-Glu-CTC_5_end_4	0	43	49	43	49	8283	7mer-1a	x	7mer-1a	0		0	CPSF7	protein_coding
ENSG00000149532	mature-tRNA-Glu-CTC_5_end_1	ENSG00000149532|ENST00000535222	157	-28.94	2	29	183	213	27	0.5926	0.7037	ENSG00000149532|ENST00000535222	mature-tRNA-Glu-CTC_5_end_1	0	38	45	38	45	8312	8mer-1a	x	8mer-1a	0		0	CPSF7	protein_coding
ENSG00000149532	mature-tRNA-Glu-CTC_5_end_2	ENSG00000149532|ENST00000535222	157	-26.37	2	29	186	213	27	0.5926	0.7037	ENSG00000149532|ENST00000535222	mature-tRNA-Glu-CTC_5_end_2	0	38	45	38	45	8313	8mer-1a	x	8mer-1a	0		0	CPSF7	protein_coding
ENSG00000149532	mature-tRNA-Glu-CTC_5_end_3	ENSG00000149532|ENST00000535222	157	-27	2	29	185	213	27	0.5926	0.7037	ENSG00000149532|ENST00000535222	mature-tRNA-Glu-CTC_5_end_3	0	38	45	38	45	8314	8mer-1a	x	8mer-1a	0		0	CPSF7	protein_coding
ENSG00000149532	mature-tRNA-Glu-CTC_5_end_4	ENSG00000149532|ENST00000535222	158	-31.86	2	32	177	213	34	0.5	0.7059	ENSG00000149532|ENST00000535222	mature-tRNA-Glu-CTC_5_end_4	0	38	45	38	45	8315	8mer-1a	x	8mer-1a	0		0	CPSF7	protein_coding
ENSG00000186104	mature-tRNA-Gly-GCC_5_end_5	ENSG00000186104|ENST00000530609	171	-27.42	2	30	634	664	28	0.6071	0.7857	ENSG00000186104|ENST00000530609	mature-tRNA-Gly-GCC_5_end_5	0	16	22	16	22	8367	7mer-m8	x	7mer-m8	0		0	CYP2R1	protein_coding
ENSG00000184792	mature-tRNA-Gly-CCC_5_end_1	ENSG00000184792|ENST00000535268	155	-16.21	2	17	1291	1320	16	0.8125	0.8125	ENSG00000184792|ENST00000535268	mature-tRNA-Gly-CCC_5_end_1	0	44	50	44	50	8401	7mer-m8	x	7mer-m8	0		0	OSBP2	protein_coding
ENSG00000184792	mature-tRNA-Gly-GCC_5_end_1	ENSG00000184792|ENST00000535268	155	-18.42	2	17	1289	1320	16	0.8125	0.8125	ENSG00000184792|ENST00000535268	mature-tRNA-Gly-GCC_5_end_1	0	44	50	44	50	8402	7mer-m8	x	7mer-m8	0		0	OSBP2	protein_coding
ENSG00000184792	mature-tRNA-Gly-GCC_5_end_2	ENSG00000184792|ENST00000535268	155	-18.54	2	17	1288	1320	16	0.8125	0.8125	ENSG00000184792|ENST00000535268	mature-tRNA-Gly-GCC_5_end_2	0	44	50	44	50	8403	7mer-m8	x	7mer-m8	0		0	OSBP2	protein_coding
ENSG00000184792	mature-tRNA-Gly-GCC_5_end_3	ENSG00000184792|ENST00000535268	155	-18.54	2	17	1287	1320	16	0.8125	0.8125	ENSG00000184792|ENST00000535268	mature-tRNA-Gly-GCC_5_end_3	0	44	50	44	50	8404	7mer-m8	x	7mer-m8	0		0	OSBP2	protein_coding
ENSG00000184792	mature-tRNA-Gly-GCC_5_end_4	ENSG00000184792|ENST00000535268	155	-18.54	2	17	1286	1320	16	0.8125	0.8125	ENSG00000184792|ENST00000535268	mature-tRNA-Gly-GCC_5_end_4	0	44	50	44	50	8405	7mer-m8	x	7mer-m8	0		0	OSBP2	protein_coding
ENSG00000149489	mature-tRNA-Glu-CTC_5_end_1	ENSG00000149489|ENST00000534093	173	-36.6	2	31	267	300	30	0.6	0.7667	ENSG00000149489|ENST00000534093	mature-tRNA-Glu-CTC_5_end_1	0	44	50	44	50	8406	7mer-1a	x	7mer-1a	0		0	ROM1	protein_coding
ENSG00000149489	mature-tRNA-Glu-CTC_5_end_2	ENSG00000149489|ENST00000534093	171	-37.66	2	29	270	300	28	0.6071	0.7857	ENSG00000149489|ENST00000534093	mature-tRNA-Glu-CTC_5_end_2	0	44	50	44	50	8407	7mer-1a	x	7mer-1a	0		0	ROM1	protein_coding
ENSG00000149489	mature-tRNA-Glu-CTC_5_end_3	ENSG00000149489|ENST00000534093	176	-37.66	2	30	269	300	29	0.6207	0.7931	ENSG00000149489|ENST00000534093	mature-tRNA-Glu-CTC_5_end_3	0	44	50	44	50	8408	7mer-1a	x	7mer-1a	0		0	ROM1	protein_coding
ENSG00000149489	mature-tRNA-Glu-CTC_5_end_4	ENSG00000149489|ENST00000534093	181	-38.27	2	31	267	300	30	0.6333	0.8	ENSG00000149489|ENST00000534093	mature-tRNA-Glu-CTC_5_end_4	0	44	50	44	50	8409	7mer-1a	x	7mer-1a	0		0	ROM1	protein_coding
ENSG00000140403	mature-tRNA-Glu-CTC_5_end_1	ENSG00000140403|ENST00000542636	152	-28.25	2	30	180	212	30	0.5667	0.7333	ENSG00000140403|ENST00000542636	mature-tRNA-Glu-CTC_5_end_1	0	29	35	29	35	8479	7mer-1a	x	7mer-1a	0		0	DNAJA4	protein_coding
ENSG00000137710	mature-tRNA-Gly-GCC_5_end_5	ENSG00000137710|ENST00000544551	156	-18.07	2	26	280	308	24	0.6667	0.75	ENSG00000137710|ENST00000544551	mature-tRNA-Gly-GCC_5_end_5	0	24	30	24	30	8494	7mer-m8	x	7mer-m8	0		0	RDX	protein_coding
ENSG00000185737	mature-tRNA-Glu-TTC_5_end_1	ENSG00000185737|ENST00000545131	167	-25.79	2	24	248	280	22	0.5909	0.8636	ENSG00000185737|ENST00000545131	mature-tRNA-Glu-TTC_5_end_1	0	53	58	53	58	8539	6mer	x	6mer	0		0	NRG3	protein_coding
ENSG00000188039	mature-tRNA-Glu-TTC_5_end_1	ENSG00000188039|ENST00000552788	154	-27.56	2	32	1118	1154	34	0.5294	0.6471	ENSG00000188039|ENST00000552788	mature-tRNA-Glu-TTC_5_end_1	0	37	43	37	43	8726	7mer-1a	x	7mer-1a	0		0	NWD1	protein_coding
ENSG00000080823	mature-tRNA-Glu-CTC_5_end_1	ENSG00000080823|ENST00000559138	151	-27.84	2	23	417	449	22	0.6818	0.7273	ENSG00000080823|ENST00000559138	mature-tRNA-Glu-CTC_5_end_1	0	51	56	51	56	8794	6mer	x	6mer	0		0	MOK	protein_coding
ENSG00000080823	mature-tRNA-Glu-CTC_5_end_2	ENSG00000080823|ENST00000559138	151	-23.88	2	23	420	449	22	0.6818	0.7273	ENSG00000080823|ENST00000559138	mature-tRNA-Glu-CTC_5_end_2	0	51	56	51	56	8795	6mer	x	6mer	0		0	MOK	protein_coding
ENSG00000080823	mature-tRNA-Glu-CTC_5_end_3	ENSG00000080823|ENST00000559138	151	-24.05	2	23	419	449	22	0.6818	0.7273	ENSG00000080823|ENST00000559138	mature-tRNA-Glu-CTC_5_end_3	0	51	56	51	56	8796	6mer	x	6mer	0		0	MOK	protein_coding
ENSG00000080823	mature-tRNA-Glu-CTC_5_end_4	ENSG00000080823|ENST00000559138	151	-27.84	2	23	417	449	22	0.6818	0.7273	ENSG00000080823|ENST00000559138	mature-tRNA-Glu-CTC_5_end_4	0	51	56	51	56	8797	6mer	x	6mer	0		0	MOK	protein_coding
ENSG00000182199	mature-tRNA-Glu-CTC_5_end_1	ENSG00000182199|ENST00000557529	149	-29.22	2	14	180	212	12	0.75	0.9167	ENSG00000182199|ENST00000557529	mature-tRNA-Glu-CTC_5_end_1	0	24	29	24	29	8903	6mer	x	6mer	0		0	SHMT2	protein_coding
ENSG00000100599	mature-tRNA-Glu-CTC_5_end_1	ENSG00000100599|ENST00000556418	165	-33.52	2	28	2401	2432	26	0.6538	0.7308	ENSG00000100599|ENST00000556418	mature-tRNA-Glu-CTC_5_end_1	0	54	59	54	59	8916	6mer	x	6mer	0		0	RIN3	protein_coding
ENSG00000100906	mature-tRNA-Glu-TTC_5_end_1	ENSG00000100906|ENST00000557140	195	-42.45	2	32	349	381	30	0.6667	0.8333	ENSG00000100906|ENST00000557140	mature-tRNA-Glu-TTC_5_end_1	0	21	26	21	26	8979	6mer	x	6mer	0		0	NFKBIA	protein_coding
ENSG00000169957	mature-tRNA-Glu-CTC_5_end_1	ENSG00000169957|ENST00000562803	155	-28.81	2	31	103	136	31	0.5806	0.6774	ENSG00000169957|ENST00000562803	mature-tRNA-Glu-CTC_5_end_1	0	34	39	34	39	8984	6mer	x	6mer	0		0	ZNF768	protein_coding
ENSG00000169957	mature-tRNA-Glu-CTC_5_end_2	ENSG00000169957|ENST00000562803	161	-27.48	2	28	108	136	26	0.6154	0.7308	ENSG00000169957|ENST00000562803	mature-tRNA-Glu-CTC_5_end_2	0	34	39	34	39	8985	6mer	x	6mer	0		0	ZNF768	protein_coding
ENSG00000169957	mature-tRNA-Glu-CTC_5_end_3	ENSG00000169957|ENST00000562803	161	-28.39	2	28	107	136	26	0.6154	0.7308	ENSG00000169957|ENST00000562803	mature-tRNA-Glu-CTC_5_end_3	0	34	39	34	39	8986	6mer	x	6mer	0		0	ZNF768	protein_coding
ENSG00000169957	mature-tRNA-Glu-CTC_5_end_4	ENSG00000169957|ENST00000562803	163	-31.56	2	31	103	136	31	0.6129	0.7097	ENSG00000169957|ENST00000562803	mature-tRNA-Glu-CTC_5_end_4	0	34	39	34	39	8987	6mer	x	6mer	0		0	ZNF768	protein_coding
ENSG00000140009	mature-tRNA-Glu-TTC_5_end_1	ENSG00000140009|ENST00000553796	154	-27.37	2	32	138	175	37	0.5946	0.6486	ENSG00000140009|ENST00000553796	mature-tRNA-Glu-TTC_5_end_1	0	23	29	23	29	8988	7mer-1a	x	7mer-1a	0		0	ESR2	protein_coding
ENSG00000140718	mature-tRNA-Gly-GCC_5_end_5	ENSG00000140718|ENST00000563011	152	-13.77	2	28	837	875	33	0.6061	0.6667	ENSG00000140718|ENST00000563011	mature-tRNA-Gly-GCC_5_end_5	0	37	43	37	43	9022	7mer-1a	x	7mer-1a	0		0	FTO	protein_coding
ENSG00000156873	mature-tRNA-Glu-CTC_5_end_1	ENSG00000156873|ENST00000563588	169	-30.91	2	29	233	265	28	0.6429	0.7857	ENSG00000156873|ENST00000563588	mature-tRNA-Glu-CTC_5_end_1	0	41	47	41	47	9098	7mer-1a	x	7mer-1a	0		0	PHKG2	protein_coding
ENSG00000126215	mature-tRNA-Glu-CTC_5_end_1	ENSG00000126215|ENST00000557439	157	-31.12	2	31	504	533	29	0.6207	0.6897	ENSG00000126215|ENST00000557439	mature-tRNA-Glu-CTC_5_end_1	0	52	58	52	58	9130	7mer-1a	x	7mer-1a	0		0	XRCC3	protein_coding
ENSG00000173517	mature-tRNA-Glu-CTC_5_end_1	ENSG00000173517|ENST00000560626	171	-29.65	2	28	8914	8945	27	0.6667	0.8148	ENSG00000173517|ENST00000560626	mature-tRNA-Glu-CTC_5_end_1	0	31	37	31	37	9134	7mer-1a	x	7mer-1a	0		0	PEAK1	protein_coding
ENSG00000173517	mature-tRNA-Glu-CTC_5_end_2	ENSG00000173517|ENST00000560626	167	-26.37	2	28	8917	8945	27	0.6296	0.8148	ENSG00000173517|ENST00000560626	mature-tRNA-Glu-CTC_5_end_2	0	31	37	31	37	9135	7mer-1a	x	7mer-1a	0		0	PEAK1	protein_coding
ENSG00000173517	mature-tRNA-Glu-CTC_5_end_3	ENSG00000173517|ENST00000560626	168	-31.54	2	30	12378	12409	29	0.5862	0.7586	ENSG00000173517|ENST00000560626	mature-tRNA-Glu-CTC_5_end_3	0	31	37	31	37	9136	7mer-1a	x	7mer-1a	0		0	PEAK1	protein_coding
ENSG00000173517	mature-tRNA-Glu-CTC_5_end_4	ENSG00000173517|ENST00000560626	170	-31.54	2	32	12376	12409	31	0.5806	0.7419	ENSG00000173517|ENST00000560626	mature-tRNA-Glu-CTC_5_end_4	0	31	37	31	37	9137	7mer-1a	x	7mer-1a	0		0	PEAK1	protein_coding
ENSG00000165914	mature-tRNA-Glu-CTC_5_end_1	ENSG00000165914|ENST00000555005	169	-39.96	2	32	720	757	35	0.6	0.7143	ENSG00000165914|ENST00000555005	mature-tRNA-Glu-CTC_5_end_1	0	15	20	15	20	9154	6mer	x	6mer	0		0	TTC7B	protein_coding
ENSG00000165914	mature-tRNA-Glu-CTC_5_end_2	ENSG00000165914|ENST00000555005	155	-35.47	2	25	726	757	25	0.6	0.72	ENSG00000165914|ENST00000555005	mature-tRNA-Glu-CTC_5_end_2	0	15	20	15	20	9155	6mer	x	6mer	0		0	TTC7B	protein_coding
ENSG00000165914	mature-tRNA-Glu-CTC_5_end_3	ENSG00000165914|ENST00000555005	155	-37.03	2	25	725	757	25	0.6	0.72	ENSG00000165914|ENST00000555005	mature-tRNA-Glu-CTC_5_end_3	0	15	20	15	20	9156	6mer	x	6mer	0		0	TTC7B	protein_coding
ENSG00000165914	mature-tRNA-Glu-CTC_5_end_4	ENSG00000165914|ENST00000555005	165	-37.27	2	32	720	757	35	0.5714	0.7143	ENSG00000165914|ENST00000555005	mature-tRNA-Glu-CTC_5_end_4	0	15	20	15	20	9157	6mer	x	6mer	0		0	TTC7B	protein_coding
ENSG00000180008	mature-tRNA-Glu-TTC_5_end_1	ENSG00000180008|ENST00000555846	159	-23.96	2	27	2616	2646	25	0.6	0.76	ENSG00000180008|ENST00000555846	mature-tRNA-Glu-TTC_5_end_1	0	49	54	49	54	9186	6mer	x	6mer	0		0	SOCS4	protein_coding
ENSG00000102893	mature-tRNA-Glu-CTC_5_end_1	ENSG00000102893|ENST00000570047	180	-33.35	2	29	114	146	27	0.6296	0.8148	ENSG00000102893|ENST00000570047	mature-tRNA-Glu-CTC_5_end_1	0	39	45	39	45	9215	7mer-m8	x	7mer-m8	0		0	PHKB	protein_coding
ENSG00000102893	mature-tRNA-Glu-CTC_5_end_2	ENSG00000102893|ENST00000570047	176	-31.06	2	29	117	146	27	0.5926	0.8148	ENSG00000102893|ENST00000570047	mature-tRNA-Glu-CTC_5_end_2	0	39	45	39	45	9216	7mer-m8	x	7mer-m8	0		0	PHKB	protein_coding
ENSG00000102893	mature-tRNA-Glu-CTC_5_end_3	ENSG00000102893|ENST00000570047	176	-31.06	2	29	116	146	27	0.5926	0.8148	ENSG00000102893|ENST00000570047	mature-tRNA-Glu-CTC_5_end_3	0	39	45	39	45	9217	7mer-m8	x	7mer-m8	0		0	PHKB	protein_coding
ENSG00000102893	mature-tRNA-Glu-CTC_5_end_4	ENSG00000102893|ENST00000570047	176	-31.06	2	29	114	146	27	0.5926	0.8148	ENSG00000102893|ENST00000570047	mature-tRNA-Glu-CTC_5_end_4	0	39	45	39	45	9218	7mer-m8	x	7mer-m8	0		0	PHKB	protein_coding
ENSG00000102908	mature-tRNA-Glu-CTC_5_end_1	ENSG00000102908|ENST00000567990	148	-27.16	2	32	1514	1552	36	0.5556	0.6389	ENSG00000102908|ENST00000567990	mature-tRNA-Glu-CTC_5_end_1	0	53	58	53	58	9220	6mer	x	6mer	0		0	NFAT5	protein_coding
ENSG00000103495	mature-tRNA-Glu-CTC_5_end_1	ENSG00000103495|ENST00000568544	151	-26.08	2	28	663	693	26	0.5385	0.7692	ENSG00000103495|ENST00000568544	mature-tRNA-Glu-CTC_5_end_1	0	25	30	25	30	9255	6mer	x	6mer	0		0	MAZ	protein_coding
ENSG00000103356	mature-tRNA-Glu-CTC_5_end_1	ENSG00000103356|ENST00000564997	163	-25.55	2	26	53	84	24	0.625	0.7917	ENSG00000103356|ENST00000564997	mature-tRNA-Glu-CTC_5_end_1	0	51	57	51	57	9261	7mer-m8	x	7mer-m8	0		0	EARS2	protein_coding
ENSG00000103356	mature-tRNA-Glu-CTC_5_end_2	ENSG00000103356|ENST00000564997	163	-27.41	2	26	56	84	24	0.625	0.7917	ENSG00000103356|ENST00000564997	mature-tRNA-Glu-CTC_5_end_2	0	51	57	51	57	9262	7mer-m8	x	7mer-m8	0		0	EARS2	protein_coding
ENSG00000103356	mature-tRNA-Glu-CTC_5_end_3	ENSG00000103356|ENST00000564997	163	-27.41	2	26	55	84	24	0.625	0.7917	ENSG00000103356|ENST00000564997	mature-tRNA-Glu-CTC_5_end_3	0	51	57	51	57	9263	7mer-m8	x	7mer-m8	0		0	EARS2	protein_coding
ENSG00000103356	mature-tRNA-Glu-CTC_5_end_4	ENSG00000103356|ENST00000564997	163	-27.41	2	26	53	84	24	0.625	0.7917	ENSG00000103356|ENST00000564997	mature-tRNA-Glu-CTC_5_end_4	0	51	57	51	57	9264	7mer-m8	x	7mer-m8	0		0	EARS2	protein_coding
ENSG00000103067	mature-tRNA-Glu-CTC_5_end_1	ENSG00000103067|ENST00000565858	156	-34.3	2	30	509	543	30	0.5	0.7333	ENSG00000103067|ENST00000565858	mature-tRNA-Glu-CTC_5_end_1	0	30	35	30	35	9310	6mer	x	6mer	0		0	ESRP2	protein_coding
ENSG00000137842	mature-tRNA-Glu-CTC_5_end_1	ENSG00000137842|ENST00000568197	161	-27.58	2	31	35	68	30	0.5333	0.7333	ENSG00000137842|ENST00000568197	mature-tRNA-Glu-CTC_5_end_1	0	31	38	31	38	9357	8mer-1a	x	8mer-1a	0		0	TMEM62	protein_coding
ENSG00000137842	mature-tRNA-Glu-CTC_5_end_2	ENSG00000137842|ENST00000568197	160	-25.71	2	29	39	68	27	0.5185	0.7407	ENSG00000137842|ENST00000568197	mature-tRNA-Glu-CTC_5_end_2	0	31	38	31	38	9358	8mer-1a	x	8mer-1a	0		0	TMEM62	protein_coding
ENSG00000137842	mature-tRNA-Glu-CTC_5_end_3	ENSG00000137842|ENST00000568197	160	-25.71	2	29	38	68	27	0.5185	0.7407	ENSG00000137842|ENST00000568197	mature-tRNA-Glu-CTC_5_end_3	0	31	38	31	38	9359	8mer-1a	x	8mer-1a	0		0	TMEM62	protein_coding
ENSG00000137842	mature-tRNA-Glu-CTC_5_end_4	ENSG00000137842|ENST00000568197	161	-28.23	2	31	35	68	30	0.5333	0.7333	ENSG00000137842|ENST00000568197	mature-tRNA-Glu-CTC_5_end_4	0	31	38	31	38	9360	8mer-1a	x	8mer-1a	0		0	TMEM62	protein_coding
ENSG00000135686	mature-tRNA-Glu-CTC_5_end_1	ENSG00000135686|ENST00000564996	156	-33.67	2	29	582	614	27	0.4815	0.7407	ENSG00000135686|ENST00000564996	mature-tRNA-Glu-CTC_5_end_1	0	43	49	43	49	9433	7mer-1a	x	7mer-1a	0		0	KLHL36	protein_coding
ENSG00000135686	mature-tRNA-Glu-CTC_5_end_2	ENSG00000135686|ENST00000564996	152	-24.72	2	29	585	614	27	0.4444	0.7407	ENSG00000135686|ENST00000564996	mature-tRNA-Glu-CTC_5_end_2	0	43	49	43	49	9434	7mer-1a	x	7mer-1a	0		0	KLHL36	protein_coding
ENSG00000135686	mature-tRNA-Glu-CTC_5_end_3	ENSG00000135686|ENST00000564996	152	-24.72	2	29	584	614	27	0.4444	0.7407	ENSG00000135686|ENST00000564996	mature-tRNA-Glu-CTC_5_end_3	0	43	49	43	49	9435	7mer-1a	x	7mer-1a	0		0	KLHL36	protein_coding
ENSG00000135686	mature-tRNA-Glu-CTC_5_end_4	ENSG00000135686|ENST00000564996	152	-30.96	2	29	582	614	27	0.4444	0.7407	ENSG00000135686|ENST00000564996	mature-tRNA-Glu-CTC_5_end_4	0	43	49	43	49	9436	7mer-1a	x	7mer-1a	0		0	KLHL36	protein_coding
ENSG00000137842	mature-tRNA-Glu-CTC_5_end_1	ENSG00000137842|ENST00000567441	161	-27.58	2	31	35	68	30	0.5333	0.7333	ENSG00000137842|ENST00000567441	mature-tRNA-Glu-CTC_5_end_1	0	40	45	40	45	9442	6mer	x	6mer	0		0	TMEM62	protein_coding
ENSG00000137842	mature-tRNA-Glu-CTC_5_end_2	ENSG00000137842|ENST00000567441	160	-25.71	2	29	39	68	27	0.5185	0.7407	ENSG00000137842|ENST00000567441	mature-tRNA-Glu-CTC_5_end_2	0	40	45	40	45	9443	6mer	x	6mer	0		0	TMEM62	protein_coding
ENSG00000137842	mature-tRNA-Glu-CTC_5_end_3	ENSG00000137842|ENST00000567441	160	-25.71	2	29	38	68	27	0.5185	0.7407	ENSG00000137842|ENST00000567441	mature-tRNA-Glu-CTC_5_end_3	0	40	45	40	45	9444	6mer	x	6mer	0		0	TMEM62	protein_coding
ENSG00000137842	mature-tRNA-Glu-CTC_5_end_4	ENSG00000137842|ENST00000567441	161	-28.23	2	31	35	68	30	0.5333	0.7333	ENSG00000137842|ENST00000567441	mature-tRNA-Glu-CTC_5_end_4	0	40	45	40	45	9445	6mer	x	6mer	0		0	TMEM62	protein_coding
ENSG00000178921	mature-tRNA-Glu-CTC_5_end_1	ENSG00000178921|ENST00000580356	163	-33.8	2	32	3253	3288	34	0.6176	0.7059	ENSG00000178921|ENST00000580356	mature-tRNA-Glu-CTC_5_end_1	0	15	22	15	22	9454	8mer-1a	x	8mer-1a	0		0	PFAS	protein_coding
ENSG00000167741	mature-tRNA-Glu-CTC_5_end_1	ENSG00000167741|ENST00000574154	151	-27.11	2	26	197	233	28	0.5714	0.7143	ENSG00000167741|ENST00000574154	mature-tRNA-Glu-CTC_5_end_1	0	33	39	33	39	9458	7mer-1a	x	7mer-1a	0		0	GGT6	protein_coding
ENSG00000166596	mature-tRNA-Glu-TTC_5_end_1	ENSG00000166596|ENST00000575247	162	-32.59	2	29	324	355	29	0.6552	0.7586	ENSG00000166596|ENST00000575247	mature-tRNA-Glu-TTC_5_end_1	0	42	47	42	47	9471	6mer	x	6mer	0		0	CFAP52	protein_coding
ENSG00000213398	mature-tRNA-Glu-CTC_5_end_1	ENSG00000213398|ENST00000573538	167	-38.16	2	32	564	596	32	0.5938	0.75	ENSG00000213398|ENST00000573538	mature-tRNA-Glu-CTC_5_end_1	0	46	52	46	52	9528	7mer-m8	x	7mer-m8	0		0	LCAT	protein_coding
ENSG00000213398	mature-tRNA-Glu-CTC_5_end_2	ENSG00000213398|ENST00000573538	152	-23.17	2	13	54	83	11	0.9091	0.9091	ENSG00000213398|ENST00000573538	mature-tRNA-Glu-CTC_5_end_2	0	46	52	46	52	9529	7mer-m8	x	7mer-m8	0		0	LCAT	protein_coding
ENSG00000213398	mature-tRNA-Glu-CTC_5_end_3	ENSG00000213398|ENST00000573538	152	-25.57	2	13	53	83	11	0.9091	0.9091	ENSG00000213398|ENST00000573538	mature-tRNA-Glu-CTC_5_end_3	0	46	52	46	52	9530	7mer-m8	x	7mer-m8	0		0	LCAT	protein_coding
ENSG00000213398	mature-tRNA-Glu-CTC_5_end_4	ENSG00000213398|ENST00000573538	153	-30.77	2	32	52	83	30	0.4667	0.7333	ENSG00000213398|ENST00000573538	mature-tRNA-Glu-CTC_5_end_4	0	46	52	46	52	9531	7mer-m8	x	7mer-m8	0		0	LCAT	protein_coding
ENSG00000141699	mature-tRNA-Gly-GCC_5_end_5	ENSG00000141699|ENST00000589797	167	-21.1	2	29	2992	3025	29	0.5862	0.7586	ENSG00000141699|ENST00000589797	mature-tRNA-Gly-GCC_5_end_5	0	16	23	16	23	9617	8mer-1a	x	8mer-1a	0		0	RETREG3	protein_coding
ENSG00000182963	mature-tRNA-Glu-CTC_5_end_1	ENSG00000182963|ENST00000592524	156	-28.82	2	31	1368	1399	29	0.5172	0.7241	ENSG00000182963|ENST00000592524	mature-tRNA-Glu-CTC_5_end_1	0	33	38	33	38	9623	6mer	x	6mer	0		0	GJC1	protein_coding
ENSG00000182963	mature-tRNA-Glu-CTC_5_end_2	ENSG00000182963|ENST00000592524	154	-26.4	2	21	1371	1399	19	0.6316	0.8421	ENSG00000182963|ENST00000592524	mature-tRNA-Glu-CTC_5_end_2	0	33	38	33	38	9624	6mer	x	6mer	0		0	GJC1	protein_coding
ENSG00000182963	mature-tRNA-Glu-CTC_5_end_3	ENSG00000182963|ENST00000592524	154	-26.4	2	21	1370	1399	19	0.6316	0.8421	ENSG00000182963|ENST00000592524	mature-tRNA-Glu-CTC_5_end_3	0	33	38	33	38	9625	6mer	x	6mer	0		0	GJC1	protein_coding
ENSG00000182963	mature-tRNA-Glu-CTC_5_end_4	ENSG00000182963|ENST00000592524	156	-28.35	2	31	1368	1399	29	0.5172	0.7241	ENSG00000182963|ENST00000592524	mature-tRNA-Glu-CTC_5_end_4	0	33	38	33	38	9626	6mer	x	6mer	0		0	GJC1	protein_coding
ENSG00000072062	mature-tRNA-Glu-TTC_5_end_1	ENSG00000072062|ENST00000593092	145	-25.82	2	32	176	204	30	0.5	0.7	ENSG00000072062|ENST00000593092	mature-tRNA-Glu-TTC_5_end_1	0	55	60	55	60	9702	6mer	x	6mer	0		0	PRKACA	protein_coding
ENSG00000168591	mature-tRNA-Glu-TTC_5_end_1	ENSG00000168591|ENST00000587172	155	-27.05	2	24	146	179	24	0.625	0.8333	ENSG00000168591|ENST00000587172	mature-tRNA-Glu-TTC_5_end_1	0	31	36	31	36	9705	6mer	x	6mer	0		0	TMUB2	protein_coding
ENSG00000125503	mature-tRNA-Glu-CTC_5_end_1	ENSG00000125503|ENST00000591938	161	-30.12	2	28	207	238	26	0.6154	0.7308	ENSG00000125503|ENST00000591938	mature-tRNA-Glu-CTC_5_end_1	0	23	28	23	28	9724	6mer	x	6mer	0		0	PPP1R12C	protein_coding
ENSG00000125503	mature-tRNA-Glu-CTC_5_end_2	ENSG00000125503|ENST00000591938	157	-26.69	2	28	210	238	26	0.5769	0.7308	ENSG00000125503|ENST00000591938	mature-tRNA-Glu-CTC_5_end_2	0	23	28	23	28	9725	6mer	x	6mer	0		0	PPP1R12C	protein_coding
ENSG00000125503	mature-tRNA-Glu-CTC_5_end_3	ENSG00000125503|ENST00000591938	157	-26.95	2	28	209	238	26	0.5769	0.7308	ENSG00000125503|ENST00000591938	mature-tRNA-Glu-CTC_5_end_3	0	23	28	23	28	9726	6mer	x	6mer	0		0	PPP1R12C	protein_coding
ENSG00000125503	mature-tRNA-Glu-CTC_5_end_4	ENSG00000125503|ENST00000591938	157	-28.62	2	28	207	238	26	0.5769	0.7308	ENSG00000125503|ENST00000591938	mature-tRNA-Glu-CTC_5_end_4	0	23	28	23	28	9727	6mer	x	6mer	0		0	PPP1R12C	protein_coding
ENSG00000125746	mature-tRNA-Glu-CTC_5_end_1	ENSG00000125746|ENST00000588308	147	-34.44	2	22	481	512	20	0.55	0.8	ENSG00000125746|ENST00000588308	mature-tRNA-Glu-CTC_5_end_1	0	45	50	45	50	9729	6mer	x	6mer	0		0	EML2	protein_coding
ENSG00000062716	mature-tRNA-Glu-TTC_5_end_1	ENSG00000062716|ENST00000593168	156	-28.07	2	32	124	157	32	0.5312	0.7188	ENSG00000062716|ENST00000593168	mature-tRNA-Glu-TTC_5_end_1	0	42	47	42	47	9733	6mer	x	6mer	0		0	VMP1	protein_coding
ENSG00000166960	mature-tRNA-Gly-CCC_5_end_1	ENSG00000166960|ENST00000581852	152	-11.88	2	13	1	15	11	0.9091	0.9091	ENSG00000166960|ENST00000581852	mature-tRNA-Gly-CCC_5_end_1	0	46	52	46	52	9734	7mer-m8	x	7mer-m8	0		0	CCDC178	protein_coding
ENSG00000166960	mature-tRNA-Gly-GCC_5_end_1	ENSG00000166960|ENST00000581852	152	-14.48	2	13	1	15	11	0.9091	0.9091	ENSG00000166960|ENST00000581852	mature-tRNA-Gly-GCC_5_end_1	0	46	52	46	52	9735	7mer-m8	x	7mer-m8	0		0	CCDC178	protein_coding
ENSG00000166960	mature-tRNA-Gly-GCC_5_end_2	ENSG00000166960|ENST00000581852	152	-14.5	2	13	1	15	11	0.9091	0.9091	ENSG00000166960|ENST00000581852	mature-tRNA-Gly-GCC_5_end_2	0	46	52	46	52	9736	7mer-m8	x	7mer-m8	0		0	CCDC178	protein_coding
ENSG00000166960	mature-tRNA-Gly-GCC_5_end_3	ENSG00000166960|ENST00000581852	152	-14.65	2	13	1	15	11	0.9091	0.9091	ENSG00000166960|ENST00000581852	mature-tRNA-Gly-GCC_5_end_3	0	46	52	46	52	9737	7mer-m8	x	7mer-m8	0		0	CCDC178	protein_coding
ENSG00000166960	mature-tRNA-Gly-GCC_5_end_4	ENSG00000166960|ENST00000581852	152	-15.46	2	13	1	15	11	0.9091	0.9091	ENSG00000166960|ENST00000581852	mature-tRNA-Gly-GCC_5_end_4	0	46	52	46	52	9738	7mer-m8	x	7mer-m8	0		0	CCDC178	protein_coding
ENSG00000196605	mature-tRNA-Glu-TTC_5_end_1	ENSG00000196605|ENST00000589453	146	-24.42	2	27	320	353	27	0.5556	0.7407	ENSG00000196605|ENST00000589453	mature-tRNA-Glu-TTC_5_end_1	0	47	52	47	52	9741	6mer	x	6mer	0		0	ZNF846	protein_coding
ENSG00000105519	mature-tRNA-Glu-CTC_5_end_1	ENSG00000105519|ENST00000588776	148	-30.75	2	30	782	817	32	0.5625	0.7188	ENSG00000105519|ENST00000588776	mature-tRNA-Glu-CTC_5_end_1	0	44	49	44	49	9764	6mer	x	6mer	0		0	CAPS	protein_coding
ENSG00000130204	mature-tRNA-Glu-CTC_5_end_1	ENSG00000130204|ENST00000592434	169	-33.99	2	27	1112	1146	27	0.6296	0.7778	ENSG00000130204|ENST00000592434	mature-tRNA-Glu-CTC_5_end_1	0	24	29	24	29	9789	6mer	x	6mer	0		0	TOMM40	protein_coding
ENSG00000130204	mature-tRNA-Glu-CTC_5_end_2	ENSG00000130204|ENST00000592434	160	-31.26	2	21	55	84	19	0.6316	0.8421	ENSG00000130204|ENST00000592434	mature-tRNA-Glu-CTC_5_end_2	0	24	29	24	29	9790	6mer	x	6mer	0		0	TOMM40	protein_coding
ENSG00000130204	mature-tRNA-Glu-CTC_5_end_3	ENSG00000130204|ENST00000592434	160	-32.79	2	21	54	84	19	0.6316	0.8421	ENSG00000130204|ENST00000592434	mature-tRNA-Glu-CTC_5_end_3	0	24	29	24	29	9791	6mer	x	6mer	0		0	TOMM40	protein_coding
ENSG00000130204	mature-tRNA-Glu-CTC_5_end_4	ENSG00000130204|ENST00000592434	165	-39.73	2	32	48	84	34	0.5588	0.7353	ENSG00000130204|ENST00000592434	mature-tRNA-Glu-CTC_5_end_4	0	24	29	24	29	9792	6mer	x	6mer	0		0	TOMM40	protein_coding
ENSG00000166974	mature-tRNA-Gly-GCC_5_end_5	ENSG00000166974|ENST00000589699	142	-15.4	2	14	1399	1428	12	0.8333	0.8333	ENSG00000166974|ENST00000589699	mature-tRNA-Gly-GCC_5_end_5	0	18	23	18	23	9809	6mer	x	6mer	0		0	MAPRE2	protein_coding
ENSG00000070526	mature-tRNA-Gly-GCC_5_end_5	ENSG00000070526|ENST00000592042	163	-16.66	2	28	2246	2275	26	0.6538	0.7692	ENSG00000070526|ENST00000592042	mature-tRNA-Gly-GCC_5_end_5	0	51	58	51	58	9831	8mer-1a	x	8mer-1a	0		0	ST6GALNAC1	protein_coding
ENSG00000196946	mature-tRNA-Glu-CTC_5_end_1	ENSG00000196946|ENST00000610508	165	-26.4	2	27	1051	1084	26	0.6154	0.7692	ENSG00000196946|ENST00000610508	mature-tRNA-Glu-CTC_5_end_1	0	15	20	15	20	9894	6mer	x	6mer	0		0	ZNF705A	protein_coding
ENSG00000196946	mature-tRNA-Glu-CTC_5_end_2	ENSG00000196946|ENST00000610508	168	-32.58	2	29	1370	1398	28	0.7143	0.7143	ENSG00000196946|ENST00000610508	mature-tRNA-Glu-CTC_5_end_2	0	15	20	15	20	9895	6mer	x	6mer	0		0	ZNF705A	protein_coding
ENSG00000196946	mature-tRNA-Glu-CTC_5_end_3	ENSG00000196946|ENST00000610508	169	-33.08	2	30	1369	1398	29	0.6897	0.7241	ENSG00000196946|ENST00000610508	mature-tRNA-Glu-CTC_5_end_3	0	15	20	15	20	9896	6mer	x	6mer	0		0	ZNF705A	protein_coding
ENSG00000196946	mature-tRNA-Glu-CTC_5_end_4	ENSG00000196946|ENST00000610508	171	-34.78	2	32	1367	1398	31	0.6774	0.7097	ENSG00000196946|ENST00000610508	mature-tRNA-Glu-CTC_5_end_4	0	15	20	15	20	9897	6mer	x	6mer	0		0	ZNF705A	protein_coding
ENSG00000270617	mature-tRNA-Glu-TTC_5_end_1	ENSG00000270617|ENST00000603700	175	-36.27	2	30	62	96	30	0.6333	0.8	ENSG00000270617|ENST00000603700	mature-tRNA-Glu-TTC_5_end_1	0	16	21	16	21	9929	6mer	x	6mer	0		0	URGCP-MRPS24	protein_coding
ENSG00000160352	mature-tRNA-Glu-CTC_5_end_1	ENSG00000160352|ENST00000596053	160	-27.05	2	28	1	26	26	0.6538	0.6923	ENSG00000160352|ENST00000596053	mature-tRNA-Glu-CTC_5_end_1	0	55	60	55	60	9932	6mer	x	6mer	0		0	ZNF714	protein_coding
ENSG00000213967	mature-tRNA-Glu-TTC_5_end_1	ENSG00000213967|ENST00000594466	162	-25.7	2	30	157	192	31	0.6452	0.7097	ENSG00000213967|ENST00000594466	mature-tRNA-Glu-TTC_5_end_1	0	24	29	24	29	9962	6mer	x	6mer	0		0	ZNF726	protein_coding
ENSG00000179913	mature-tRNA-Glu-CTC_5_end_1	ENSG00000179913|ENST00000595387	166	-34.93	2	32	77	111	32	0.5312	0.75	ENSG00000179913|ENST00000595387	mature-tRNA-Glu-CTC_5_end_1	0	44	50	44	50	9992	7mer-1a	x	7mer-1a	0		0	B3GNT3	protein_coding
ENSG00000268606	mature-tRNA-Gly-GCC_5_end_5	ENSG00000268606|ENST00000611557	161	-15.86	2	31	192	228	34	0.5882	0.6471	ENSG00000268606|ENST00000611557	mature-tRNA-Gly-GCC_5_end_5	0	49	56	49	56	10023	8mer-1a	x	8mer-1a	0		0	MAGEA2	protein_coding
ENSG00000198131	mature-tRNA-Gly-GCC_5_end_5	ENSG00000198131|ENST00000600220	159	-22.54	2	31	311	342	30	0.6	0.7	ENSG00000198131|ENST00000600220	mature-tRNA-Gly-GCC_5_end_5	0	27	33	27	33	10030	7mer-m8	x	7mer-m8	0		0	ZNF544	protein_coding
ENSG00000062822	mature-tRNA-Glu-CTC_5_end_1	ENSG00000062822|ENST00000600859	159	-31.87	2	32	25	56	31	0.5484	0.7419	ENSG00000062822|ENST00000600859	mature-tRNA-Glu-CTC_5_end_1	0	17	22	17	22	10035	6mer	x	6mer	0		0	POLD1	protein_coding
ENSG00000062822	mature-tRNA-Glu-CTC_5_end_2	ENSG00000062822|ENST00000600859	145	-27.29	2	28	197	230	30	0.5333	0.6667	ENSG00000062822|ENST00000600859	mature-tRNA-Glu-CTC_5_end_2	0	17	22	17	22	10036	6mer	x	6mer	0		0	POLD1	protein_coding
ENSG00000062822	mature-tRNA-Glu-CTC_5_end_3	ENSG00000062822|ENST00000600859	145	-27.46	2	28	196	230	30	0.5333	0.6667	ENSG00000062822|ENST00000600859	mature-tRNA-Glu-CTC_5_end_3	0	17	22	17	22	10037	6mer	x	6mer	0		0	POLD1	protein_coding
ENSG00000062822	mature-tRNA-Glu-CTC_5_end_4	ENSG00000062822|ENST00000600859	145	-29.07	2	28	194	230	30	0.5333	0.6667	ENSG00000062822|ENST00000600859	mature-tRNA-Glu-CTC_5_end_4	0	17	22	17	22	10038	6mer	x	6mer	0		0	POLD1	protein_coding
ENSG00000160961	mature-tRNA-Glu-TTC_5_end_1	ENSG00000160961|ENST00000598161	164	-28.24	2	30	1224	1257	31	0.6129	0.7742	ENSG00000160961|ENST00000598161	mature-tRNA-Glu-TTC_5_end_1	0	34	40	34	40	10061	7mer-1a	x	7mer-1a	0		0	ZNF333	protein_coding
ENSG00000134987	mature-tRNA-Glu-TTC_5_end_1	ENSG00000134987|ENST00000612402	161	-28.34	2	30	749	783	31	0.6452	0.7097	ENSG00000134987|ENST00000612402	mature-tRNA-Glu-TTC_5_end_1	0	45	50	45	50	10073	6mer	x	6mer	0		0	WDR36	protein_coding
ENSG00000099968	mature-tRNA-Glu-CTC_5_end_1	ENSG00000099968|ENST00000611738	163	-30.93	2	24	1253	1285	22	0.6364	0.7727	ENSG00000099968|ENST00000611738	mature-tRNA-Glu-CTC_5_end_1	0	34	40	34	40	10080	7mer-1a	x	7mer-1a	0		0	BCL2L13	protein_coding
ENSG00000134250	mature-tRNA-Glu-CTC_5_end_1	ENSG00000134250|ENST00000602566	174	-34.99	2	28	1515	1548	27	0.6296	0.8148	ENSG00000134250|ENST00000602566	mature-tRNA-Glu-CTC_5_end_1	0	30	36	30	36	10089	7mer-1a	x	7mer-1a	0		0	NOTCH2	protein_coding
ENSG00000186501	mature-tRNA-Glu-CTC_5_end_1	ENSG00000186501|ENST00000608611	159	-37.36	2	31	1	32	30	0.6	0.7	ENSG00000186501|ENST00000608611	mature-tRNA-Glu-CTC_5_end_1	0	42	47	42	47	10117	6mer	x	6mer	0		0	TMEM222	protein_coding
ENSG00000186501	mature-tRNA-Glu-CTC_5_end_2	ENSG00000186501|ENST00000608611	158	-33.77	2	22	3	32	21	0.7143	0.8095	ENSG00000186501|ENST00000608611	mature-tRNA-Glu-CTC_5_end_2	0	42	47	42	47	10118	6mer	x	6mer	0		0	TMEM222	protein_coding
ENSG00000186501	mature-tRNA-Glu-CTC_5_end_3	ENSG00000186501|ENST00000608611	158	-35.48	2	22	2	32	21	0.7143	0.8095	ENSG00000186501|ENST00000608611	mature-tRNA-Glu-CTC_5_end_3	0	42	47	42	47	10119	6mer	x	6mer	0		0	TMEM222	protein_coding
ENSG00000186501	mature-tRNA-Glu-CTC_5_end_4	ENSG00000186501|ENST00000608611	160	-37.41	2	31	1	32	31	0.6452	0.7419	ENSG00000186501|ENST00000608611	mature-tRNA-Glu-CTC_5_end_4	0	42	47	42	47	10120	6mer	x	6mer	0		0	TMEM222	protein_coding
ENSG00000105486	mature-tRNA-Glu-CTC_5_end_1	ENSG00000105486|ENST00000601091	155	-35.44	2	31	409	437	29	0.6552	0.6897	ENSG00000105486|ENST00000601091	mature-tRNA-Glu-CTC_5_end_1	0	35	40	35	40	10125	6mer	x	6mer	0		0	LIG1	protein_coding
ENSG00000105486	mature-tRNA-Glu-CTC_5_end_2	ENSG00000105486|ENST00000601091	162	-35.27	2	24	407	437	23	0.6522	0.7826	ENSG00000105486|ENST00000601091	mature-tRNA-Glu-CTC_5_end_2	0	35	40	35	40	10126	6mer	x	6mer	0		0	LIG1	protein_coding
ENSG00000105486	mature-tRNA-Glu-CTC_5_end_3	ENSG00000105486|ENST00000601091	162	-35.44	2	24	406	437	23	0.6522	0.7826	ENSG00000105486|ENST00000601091	mature-tRNA-Glu-CTC_5_end_3	0	35	40	35	40	10127	6mer	x	6mer	0		0	LIG1	protein_coding
ENSG00000105486	mature-tRNA-Glu-CTC_5_end_4	ENSG00000105486|ENST00000601091	162	-35.44	2	24	404	437	23	0.6522	0.7826	ENSG00000105486|ENST00000601091	mature-tRNA-Glu-CTC_5_end_4	0	35	40	35	40	10128	6mer	x	6mer	0		0	LIG1	protein_coding
ENSG00000124493	mature-tRNA-Glu-CTC_5_end_1	ENSG00000124493|ENST00000609278	190	-44.4	2	32	43	76	31	0.7097	0.7742	ENSG00000124493|ENST00000609278	mature-tRNA-Glu-CTC_5_end_1	0	19	25	19	25	10134	7mer-m8	x	7mer-m8	0		0	GRM4	protein_coding
ENSG00000066185	mature-tRNA-Gly-GCC_5_end_5	ENSG00000066185|ENST00000611861	150	-16.82	2	30	204	240	33	0.6061	0.6364	ENSG00000066185|ENST00000611861	mature-tRNA-Gly-GCC_5_end_5	0	33	39	33	39	10139	7mer-1a	x	7mer-1a	0		0	ZMYND12	protein_coding
ENSG00000167785	mature-tRNA-Glu-CTC_5_end_1	ENSG00000167785|ENST00000601372	166	-33.83	2	32	4111	4144	31	0.5806	0.7097	ENSG00000167785|ENST00000601372	mature-tRNA-Glu-CTC_5_end_1	0	47	52	47	52	10163	6mer	x	6mer	0		0	ZNF558	protein_coding
ENSG00000005700	mature-tRNA-Gly-GCC_5_end_5	ENSG00000005700|ENST00000610980	168	-18.06	2	30	946	978	29	0.5862	0.7586	ENSG00000005700|ENST00000610980	mature-tRNA-Gly-GCC_5_end_5	0	54	59	54	59	10170	6mer	x	6mer	0		0	IBTK	protein_coding
ENSG00000183850	mature-tRNA-Gly-GCC_5_end_5	ENSG00000183850|ENST00000597761	170	-24.89	2	29	137	173	32	0.625	0.75	ENSG00000183850|ENST00000597761	mature-tRNA-Gly-GCC_5_end_5	0	48	54	48	54	10182	7mer-1a	x	7mer-1a	0		0	ZNF730	protein_coding
ENSG00000272325	mature-tRNA-Gly-GCC_5_end_5	ENSG00000272325|ENST00000607016	148	-16.49	2	23	7714	7744	21	0.619	0.7143	ENSG00000272325|ENST00000607016	mature-tRNA-Gly-GCC_5_end_5	0	45	50	45	50	10221	6mer	x	6mer	0		0	NUDT3	protein_coding
ENSG00000184349	mature-tRNA-Gly-GCC_5_end_5	ENSG00000184349|ENST00000611503	157	-18.25	2	31	2455	2489	32	0.5312	0.6875	ENSG00000184349|ENST00000611503	mature-tRNA-Gly-GCC_5_end_5	0	18	24	18	24	10255	7mer-1a	x	7mer-1a	0		0	EFNA5	protein_coding
ENSG00000137868	mature-tRNA-Glu-CTC_5_end_1	ENSG00000137868|ENST00000616000	161	-31.8	2	30	237	269	30	0.6	0.7333	ENSG00000137868|ENST00000616000	mature-tRNA-Glu-CTC_5_end_1	0	46	51	46	51	10299	6mer	x	6mer	0		0	STRA6	protein_coding
ENSG00000160695	mature-tRNA-Glu-TTC_5_end_1	ENSG00000160695|ENST00000614944	151	-24.3	2	21	1	23	20	0.65	0.75	ENSG00000160695|ENST00000614944	mature-tRNA-Glu-TTC_5_end_1	0	43	49	43	49	10321	7mer-m8	x	7mer-m8	0		0	VPS11	protein_coding
ENSG00000165949	mature-tRNA-Glu-CTC_5_end_1	ENSG00000165949|ENST00000618863	148	-32	2	32	6	43	35	0.5714	0.6286	ENSG00000165949|ENST00000618863	mature-tRNA-Glu-CTC_5_end_1	0	42	48	42	48	10323	7mer-m8	x	7mer-m8	0		0	IFI27	protein_coding
ENSG00000157330	mature-tRNA-Gly-GCC_5_end_5	ENSG00000157330|ENST00000614859	151	-19.23	2	29	1547	1581	30	0.5333	0.6667	ENSG00000157330|ENST00000614859	mature-tRNA-Gly-GCC_5_end_5	0	18	23	18	23	10331	6mer	x	6mer	0		0	C1orf158	protein_coding
ENSG00000124507	mature-tRNA-Glu-CTC_5_end_1	ENSG00000124507|ENST00000620693	162	-31.82	2	30	2460	2493	30	0.5667	0.7667	ENSG00000124507|ENST00000620693	mature-tRNA-Glu-CTC_5_end_1	0	39	44	39	44	10377	6mer	x	6mer	0		0	PACSIN1	protein_coding
ENSG00000124507	mature-tRNA-Glu-CTC_5_end_2	ENSG00000124507|ENST00000620693	153	-29.87	2	29	2463	2493	29	0.5172	0.7586	ENSG00000124507|ENST00000620693	mature-tRNA-Glu-CTC_5_end_2	0	39	44	39	44	10378	6mer	x	6mer	0		0	PACSIN1	protein_coding
ENSG00000124507	mature-tRNA-Glu-CTC_5_end_3	ENSG00000124507|ENST00000620693	158	-29.87	2	30	2462	2493	30	0.5333	0.7667	ENSG00000124507|ENST00000620693	mature-tRNA-Glu-CTC_5_end_3	0	39	44	39	44	10379	6mer	x	6mer	0		0	PACSIN1	protein_coding
ENSG00000124507	mature-tRNA-Glu-CTC_5_end_4	ENSG00000124507|ENST00000620693	158	-29.87	2	30	2460	2493	30	0.5333	0.7667	ENSG00000124507|ENST00000620693	mature-tRNA-Glu-CTC_5_end_4	0	39	44	39	44	10380	6mer	x	6mer	0		0	PACSIN1	protein_coding
ENSG00000161904	mature-tRNA-Glu-CTC_5_end_1	ENSG00000161904|ENST00000614475	155	-35.91	2	31	329	355	29	0.5517	0.7241	ENSG00000161904|ENST00000614475	mature-tRNA-Glu-CTC_5_end_1	0	44	49	44	49	10397	6mer	x	6mer	0		0	LEMD2	protein_coding
ENSG00000108219	mature-tRNA-Glu-TTC_5_end_1	ENSG00000108219|ENST00000616406	151	-26.55	2	32	223	255	30	0.4667	0.6667	ENSG00000108219|ENST00000616406	mature-tRNA-Glu-TTC_5_end_1	0	34	40	34	40	10411	7mer-1a	x	7mer-1a	0		0	TSPAN14	protein_coding
ENSG00000187634	mature-tRNA-Glu-CTC_5_end_1	ENSG00000187634|ENST00000620200	140	-29.08	2	9	894	926	7	1	1	ENSG00000187634|ENST00000620200	mature-tRNA-Glu-CTC_5_end_1	0	19	25	19	25	10447	7mer-m8	x	7mer-m8	0		0	SAMD11	protein_coding
ENSG00000117281	mature-tRNA-Glu-TTC_5_end_1	ENSG00000117281|ENST00000616463	152	-28.63	2	31	1742	1774	31	0.6129	0.7097	ENSG00000117281|ENST00000616463	mature-tRNA-Glu-TTC_5_end_1	0	43	50	43	50	10462	8mer-1a	x	8mer-1a	0		0	CD160	protein_coding
ENSG00000162747	mature-tRNA-Gly-GCC_5_end_5	ENSG00000162747|ENST00000614870	158	-12.62	2	29	428	457	28	0.6429	0.75	ENSG00000162747|ENST00000614870	mature-tRNA-Gly-GCC_5_end_5	0	16	22	16	22	10463	7mer-1a	x	7mer-1a	0		0	FCGR3B	protein_coding
ENSG00000214575	mature-tRNA-Glu-CTC_5_end_1	ENSG00000214575|ENST00000615198	179	-41.95	2	32	59	89	30	0.7	0.7667	ENSG00000214575|ENST00000615198	mature-tRNA-Glu-CTC_5_end_1	0	43	48	43	48	10464	6mer	x	6mer	0		0	CPEB1	protein_coding
ENSG00000214575	mature-tRNA-Glu-CTC_5_end_2	ENSG00000214575|ENST00000615198	173	-38.04	2	26	62	89	24	0.75	0.8333	ENSG00000214575|ENST00000615198	mature-tRNA-Glu-CTC_5_end_2	0	43	48	43	48	10465	6mer	x	6mer	0		0	CPEB1	protein_coding
ENSG00000214575	mature-tRNA-Glu-CTC_5_end_3	ENSG00000214575|ENST00000615198	173	-38.73	2	26	61	89	24	0.75	0.8333	ENSG00000214575|ENST00000615198	mature-tRNA-Glu-CTC_5_end_3	0	43	48	43	48	10466	6mer	x	6mer	0		0	CPEB1	protein_coding
ENSG00000214575	mature-tRNA-Glu-CTC_5_end_4	ENSG00000214575|ENST00000615198	175	-39.66	2	32	59	89	30	0.6667	0.7667	ENSG00000214575|ENST00000615198	mature-tRNA-Glu-CTC_5_end_4	0	43	48	43	48	10467	6mer	x	6mer	0		0	CPEB1	protein_coding
ENSG00000136546	mature-tRNA-Gly-GCC_5_end_5	ENSG00000136546|ENST00000619410	152	-14.86	2	27	887	916	26	0.6538	0.7308	ENSG00000136546|ENST00000619410	mature-tRNA-Gly-GCC_5_end_5	0	29	35	29	35	10498	7mer-1a	x	7mer-1a	0		0	SCN7A	protein_coding
ENSG00000081692	mature-tRNA-Glu-CTC_5_end_1	ENSG00000081692|ENST00000620518	167	-34.62	2	27	416	446	25	0.64	0.8	ENSG00000081692|ENST00000620518	mature-tRNA-Glu-CTC_5_end_1	0	55	60	55	60	10550	6mer	x	6mer	0		0	JMJD4	protein_coding
ENSG00000081692	mature-tRNA-Glu-CTC_5_end_2	ENSG00000081692|ENST00000620518	167	-28.31	2	27	419	446	25	0.64	0.8	ENSG00000081692|ENST00000620518	mature-tRNA-Glu-CTC_5_end_2	0	55	60	55	60	10551	6mer	x	6mer	0		0	JMJD4	protein_coding
ENSG00000081692	mature-tRNA-Glu-CTC_5_end_3	ENSG00000081692|ENST00000620518	167	-28.43	2	27	418	446	25	0.64	0.8	ENSG00000081692|ENST00000620518	mature-tRNA-Glu-CTC_5_end_3	0	55	60	55	60	10552	6mer	x	6mer	0		0	JMJD4	protein_coding
ENSG00000081692	mature-tRNA-Glu-CTC_5_end_4	ENSG00000081692|ENST00000620518	167	-31.91	2	27	416	446	25	0.64	0.8	ENSG00000081692|ENST00000620518	mature-tRNA-Glu-CTC_5_end_4	0	55	60	55	60	10553	6mer	x	6mer	0		0	JMJD4	protein_coding
ENSG00000251247	mature-tRNA-Gly-GCC_5_end_5	ENSG00000251247|ENST00000614069	175	-29.65	2	31	53	91	36	0.6667	0.7222	ENSG00000251247|ENST00000614069	mature-tRNA-Gly-GCC_5_end_5	0	19	25	19	25	10588	7mer-1a	x	7mer-1a	0		0	ZNF345	protein_coding
ENSG00000157335	mature-tRNA-Glu-CTC_5_end_1	ENSG00000157335|ENST00000618957	154	-28.23	2	21	150	181	19	0.6842	0.7895	ENSG00000157335|ENST00000618957	mature-tRNA-Glu-CTC_5_end_1	0	44	49	44	49	10609	6mer	x	6mer	0		0	CLEC18C	protein_coding
ENSG00000157335	mature-tRNA-Glu-CTC_5_end_2	ENSG00000157335|ENST00000618957	146	-26.75	2	23	657	686	21	0.5238	0.7143	ENSG00000157335|ENST00000618957	mature-tRNA-Glu-CTC_5_end_2	0	44	49	44	49	10610	6mer	x	6mer	0		0	CLEC18C	protein_coding
ENSG00000157335	mature-tRNA-Glu-CTC_5_end_3	ENSG00000157335|ENST00000618957	146	-28.12	2	23	656	686	21	0.5238	0.7143	ENSG00000157335|ENST00000618957	mature-tRNA-Glu-CTC_5_end_3	0	44	49	44	49	10611	6mer	x	6mer	0		0	CLEC18C	protein_coding
ENSG00000157335	mature-tRNA-Glu-CTC_5_end_4	ENSG00000157335|ENST00000618957	148	-28.39	2	32	660	686	30	0.5333	0.6667	ENSG00000157335|ENST00000618957	mature-tRNA-Glu-CTC_5_end_4	0	44	49	44	49	10612	6mer	x	6mer	0		0	CLEC18C	protein_coding
ENSG00000140740	mature-tRNA-Gly-GCC_5_end_5	ENSG00000140740|ENST00000618892	183	-24.7	2	27	189	220	26	0.7692	0.8462	ENSG00000140740|ENST00000618892	mature-tRNA-Gly-GCC_5_end_5	0	47	52	47	52	10648	6mer	x	6mer	0		0	UQCRC2	protein_coding
ENSG00000125843	mature-tRNA-Glu-TTC_5_end_1	ENSG00000125843|ENST00000615891	167	-32.85	2	31	3285	3314	30	0.6333	0.8	ENSG00000125843|ENST00000615891	mature-tRNA-Glu-TTC_5_end_1	0	47	52	47	52	10649	6mer	x	6mer	0		0	AP5S1	protein_coding
ENSG00000196090	mature-tRNA-Glu-CTC_5_end_1	ENSG00000196090|ENST00000617474	169	-38.44	2	18	949	981	16	0.8125	0.9375	ENSG00000196090|ENST00000617474	mature-tRNA-Glu-CTC_5_end_1	0	43	48	43	48	10661	6mer	x	6mer	0		0	PTPRT	protein_coding
ENSG00000113494	mature-tRNA-Gly-GCC_5_end_5	ENSG00000113494|ENST00000620785	172	-18.78	2	31	6362	6390	29	0.6897	0.7931	ENSG00000113494|ENST00000620785	mature-tRNA-Gly-GCC_5_end_5	0	37	42	37	42	10718	6mer	x	6mer	0		0	PRLR	protein_coding
ENSG00000165731	mature-tRNA-Glu-CTC_5_end_1	ENSG00000165731|ENST00000615310	160	-28.63	2	28	50	82	27	0.6296	0.7407	ENSG00000165731|ENST00000615310	mature-tRNA-Glu-CTC_5_end_1	0	43	48	43	48	10733	6mer	x	6mer	0		0	RET	protein_coding
ENSG00000114956	mature-tRNA-Glu-CTC_5_end_1	ENSG00000114956|ENST00000629438	157	-30.86	2	18	211	243	16	0.75	0.8125	ENSG00000114956|ENST00000629438	mature-tRNA-Glu-CTC_5_end_1	0	49	54	49	54	10837	6mer	x	6mer	0		0	DGUOK	protein_coding
ENSG00000204138	mature-tRNA-Gly-CCC_5_end_1	ENSG00000204138|ENST00000632421	160	-25.28	2	27	968	1002	31	0.6129	0.7097	ENSG00000204138|ENST00000632421	mature-tRNA-Gly-CCC_5_end_1	0	48	55	48	55	10915	8mer-1a	x	8mer-1a	0		0	PHACTR4	protein_coding
ENSG00000204138	mature-tRNA-Gly-GCC_5_end_1	ENSG00000204138|ENST00000632421	160	-25.55	2	27	967	1002	31	0.6129	0.7097	ENSG00000204138|ENST00000632421	mature-tRNA-Gly-GCC_5_end_1	0	48	55	48	55	10916	8mer-1a	x	8mer-1a	0		0	PHACTR4	protein_coding
ENSG00000204138	mature-tRNA-Gly-GCC_5_end_2	ENSG00000204138|ENST00000632421	164	-25.55	2	31	965	1002	35	0.6	0.6857	ENSG00000204138|ENST00000632421	mature-tRNA-Gly-GCC_5_end_2	0	48	55	48	55	10917	8mer-1a	x	8mer-1a	0		0	PHACTR4	protein_coding
ENSG00000204138	mature-tRNA-Gly-GCC_5_end_3	ENSG00000204138|ENST00000632421	164	-26.45	2	31	964	1002	35	0.6	0.6857	ENSG00000204138|ENST00000632421	mature-tRNA-Gly-GCC_5_end_3	0	48	55	48	55	10918	8mer-1a	x	8mer-1a	0		0	PHACTR4	protein_coding
ENSG00000204138	mature-tRNA-Gly-GCC_5_end_4	ENSG00000204138|ENST00000632421	165	-26.72	2	33	962	1002	38	0.6053	0.6842	ENSG00000204138|ENST00000632421	mature-tRNA-Gly-GCC_5_end_4	0	48	55	48	55	10919	8mer-1a	x	8mer-1a	0		0	PHACTR4	protein_coding
ENSG00000136877	mature-tRNA-Glu-CTC_5_end_1	ENSG00000136877|ENST00000630236	159	-32.76	2	31	581	614	31	0.5161	0.7742	ENSG00000136877|ENST00000630236	mature-tRNA-Glu-CTC_5_end_1	0	32	37	32	37	10989	6mer	x	6mer	0		0	FPGS	protein_coding
ENSG00000132912	mature-tRNA-Glu-TTC_5_end_1	ENSG00000132912|ENST00000627368	165	-30.53	2	26	109	142	26	0.6923	0.8077	ENSG00000132912|ENST00000627368	mature-tRNA-Glu-TTC_5_end_1	0	20	25	20	25	11036	6mer	x	6mer	0		0	DCTN4	protein_coding
ENSG00000244687	mature-tRNA-Glu-CTC_5_end_1	ENSG00000244687|ENST00000625172	158	-28.12	2	21	937	968	19	0.7368	0.7895	ENSG00000244687|ENST00000625172	mature-tRNA-Glu-CTC_5_end_1	0	24	30	24	30	11105	7mer-1a	x	7mer-1a	0		0	UBE2V1	protein_coding
ENSG00000244687	mature-tRNA-Glu-CTC_5_end_2	ENSG00000244687|ENST00000625172	158	-24.32	2	21	940	968	19	0.7368	0.7895	ENSG00000244687|ENST00000625172	mature-tRNA-Glu-CTC_5_end_2	0	24	30	24	30	11106	7mer-1a	x	7mer-1a	0		0	UBE2V1	protein_coding
ENSG00000244687	mature-tRNA-Glu-CTC_5_end_3	ENSG00000244687|ENST00000625172	158	-24.49	2	21	939	968	19	0.7368	0.7895	ENSG00000244687|ENST00000625172	mature-tRNA-Glu-CTC_5_end_3	0	24	30	24	30	11107	7mer-1a	x	7mer-1a	0		0	UBE2V1	protein_coding
ENSG00000244687	mature-tRNA-Glu-CTC_5_end_4	ENSG00000244687|ENST00000625172	158	-26.31	2	21	937	968	19	0.7368	0.7895	ENSG00000244687|ENST00000625172	mature-tRNA-Glu-CTC_5_end_4	0	24	30	24	30	11108	7mer-1a	x	7mer-1a	0		0	UBE2V1	protein_coding
ENSG00000275832	mature-tRNA-Glu-CTC_5_end_1	ENSG00000275832|ENST00000622683	155	-28.2	2	31	662	689	29	0.6207	0.6897	ENSG00000275832|ENST00000622683	mature-tRNA-Glu-CTC_5_end_1	0	15	21	15	21	11113	7mer-1a	x	7mer-1a	0		0	ARHGAP23	protein_coding
ENSG00000275832	mature-tRNA-Glu-CTC_5_end_2	ENSG00000275832|ENST00000622683	154	-25.61	2	28	659	689	27	0.5556	0.7037	ENSG00000275832|ENST00000622683	mature-tRNA-Glu-CTC_5_end_2	0	15	21	15	21	11114	7mer-1a	x	7mer-1a	0		0	ARHGAP23	protein_coding
ENSG00000275832	mature-tRNA-Glu-CTC_5_end_3	ENSG00000275832|ENST00000622683	154	-25.61	2	28	658	689	27	0.5556	0.7037	ENSG00000275832|ENST00000622683	mature-tRNA-Glu-CTC_5_end_3	0	15	21	15	21	11115	7mer-1a	x	7mer-1a	0		0	ARHGAP23	protein_coding
ENSG00000275832	mature-tRNA-Glu-CTC_5_end_4	ENSG00000275832|ENST00000622683	155	-26.82	2	31	662	689	29	0.6207	0.6897	ENSG00000275832|ENST00000622683	mature-tRNA-Glu-CTC_5_end_4	0	15	21	15	21	11116	7mer-1a	x	7mer-1a	0		0	ARHGAP23	protein_coding
ENSG00000092621	mature-tRNA-Glu-CTC_5_end_1	ENSG00000092621|ENST00000641375	162	-31.53	2	32	1046	1079	31	0.6129	0.6452	ENSG00000092621|ENST00000641375	mature-tRNA-Glu-CTC_5_end_1	0	55	60	55	60	11138	6mer	x	6mer	0		0	PHGDH	protein_coding
ENSG00000092621	mature-tRNA-Glu-CTC_5_end_2	ENSG00000092621|ENST00000641375	159	-31.53	2	25	1049	1079	24	0.6667	0.7083	ENSG00000092621|ENST00000641375	mature-tRNA-Glu-CTC_5_end_2	0	55	60	55	60	11139	6mer	x	6mer	0		0	PHGDH	protein_coding
ENSG00000092621	mature-tRNA-Glu-CTC_5_end_3	ENSG00000092621|ENST00000641375	160	-31.53	2	30	1048	1079	29	0.6207	0.6552	ENSG00000092621|ENST00000641375	mature-tRNA-Glu-CTC_5_end_3	0	55	60	55	60	11140	6mer	x	6mer	0		0	PHGDH	protein_coding
ENSG00000092621	mature-tRNA-Glu-CTC_5_end_4	ENSG00000092621|ENST00000641375	162	-31.53	2	32	1046	1079	31	0.6129	0.6452	ENSG00000092621|ENST00000641375	mature-tRNA-Glu-CTC_5_end_4	0	55	60	55	60	11141	6mer	x	6mer	0		0	PHGDH	protein_coding
ENSG00000172456	mature-tRNA-Gly-GCC_5_end_5	ENSG00000172456|ENST00000634364	160	-16.38	2	31	898	928	29	0.5862	0.6897	ENSG00000172456|ENST00000634364	mature-tRNA-Gly-GCC_5_end_5	0	54	59	54	59	11188	6mer	x	6mer	0		0	FGGY	protein_coding
ENSG00000184144	mature-tRNA-Glu-CTC_5_end_1	ENSG00000184144|ENST00000638577	152	-27.01	2	31	850	884	31	0.5806	0.6452	ENSG00000184144|ENST00000638577	mature-tRNA-Glu-CTC_5_end_1	0	43	50	43	50	11198	8mer-1a	x	8mer-1a	0		0	CNTN2	protein_coding
ENSG00000108433	mature-tRNA-Glu-CTC_5_end_1	ENSG00000108433|ENST00000640051	174	-37.12	2	31	2669	2707	35	0.6857	0.7429	ENSG00000108433|ENST00000640051	mature-tRNA-Glu-CTC_5_end_1	0	26	31	26	31	11207	6mer	x	6mer	0		0	GOSR2	protein_coding
ENSG00000109339	mature-tRNA-Glu-CTC_5_end_1	ENSG00000109339|ENST00000641656	152	-27.32	2	31	856	891	32	0.5938	0.625	ENSG00000109339|ENST00000641656	mature-tRNA-Glu-CTC_5_end_1	0	42	48	42	48	11216	7mer-m8	x	7mer-m8	0		0	MAPK10	protein_coding
ENSG00000108433	mature-tRNA-Glu-CTC_5_end_1	ENSG00000108433|ENST00000640443	174	-37.12	2	31	2669	2707	35	0.6857	0.7429	ENSG00000108433|ENST00000640443	mature-tRNA-Glu-CTC_5_end_1	0	37	42	37	42	11226	6mer	x	6mer	0		0	GOSR2	protein_coding
ENSG00000109339	mature-tRNA-Gly-GCC_5_end_5	ENSG00000109339|ENST00000641823	154	-21.83	2	20	57	89	19	0.7368	0.7368	ENSG00000109339|ENST00000641823	mature-tRNA-Gly-GCC_5_end_5	0	18	25	18	25	11240	8mer-1a	x	8mer-1a	0		0	MAPK10	protein_coding
ENSG00000138760	mature-tRNA-Glu-TTC_5_end_1	ENSG00000138760|ENST00000638295	163	-22.79	2	32	176	205	30	0.6	0.7	ENSG00000138760|ENST00000638295	mature-tRNA-Glu-TTC_5_end_1	0	48	53	48	53	11245	6mer	x	6mer	0		0	SCARB2	protein_coding
ENSG00000283782	mature-tRNA-Glu-CTC_5_end_1	ENSG00000283782|ENST00000638568	155	-25.63	2	28	3406	3439	28	0.5714	0.7857	ENSG00000283782|ENST00000638568	mature-tRNA-Glu-CTC_5_end_1	0	39	46	39	46	11247	8mer-1a	x	8mer-1a	0		0	AC116366.2	protein_coding
ENSG00000164073	mature-tRNA-Gly-GCC_5_end_5	ENSG00000164073|ENST00000641092	159	-15.11	2	29	2631	2659	27	0.6667	0.7037	ENSG00000164073|ENST00000641092	mature-tRNA-Gly-GCC_5_end_5	0	40	47	40	47	11294	8mer-1a	x	8mer-1a	0		0	MFSD8	protein_coding
ENSG00000186440	mature-tRNA-Glu-CTC_5_end_1	ENSG00000186440|ENST00000641540	164	-30.9	2	32	768	798	30	0.5333	0.7667	ENSG00000186440|ENST00000641540	mature-tRNA-Glu-CTC_5_end_1	0	22	27	22	27	11295	6mer	x	6mer	0		0	OR6P1	protein_coding
ENSG00000197077	mature-tRNA-Gly-GCC_5_end_5	ENSG00000197077|ENST00000637069	159	-11.15	2	25	4814	4846	24	0.625	0.75	ENSG00000197077|ENST00000637069	mature-tRNA-Gly-GCC_5_end_5	0	37	42	37	42	11307	6mer	x	6mer	0		0	KIAA1671	protein_coding
ENSG00000144285	mature-tRNA-Glu-TTC_5_end_1	ENSG00000144285|ENST00000636194	167	-34.15	2	30	338	366	28	0.6429	0.7857	ENSG00000144285|ENST00000636194	mature-tRNA-Glu-TTC_5_end_1	0	18	24	18	24	11308	7mer-1a	x	7mer-1a	0		0	SCN1A	protein_coding
ENSG00000284337	mature-tRNA-Glu-CTC_5_end_1	ENSG00000284337|ENST00000640669	164	-44.1	2	32	1181	1208	30	0.6	0.7667	ENSG00000284337|ENST00000640669	mature-tRNA-Glu-CTC_5_end_1	0	31	36	31	36	11327	6mer	x	6mer	0		0	AC013271.1	protein_coding
ENSG00000104763	mature-tRNA-Glu-TTC_5_end_1	ENSG00000104763|ENST00000636701	176	-32.03	2	32	245	278	32	0.5938	0.8125	ENSG00000104763|ENST00000636701	mature-tRNA-Glu-TTC_5_end_1	0	30	35	30	35	11369	6mer	x	6mer	0		0	ASAH1	protein_coding
ENSG00000109339	mature-tRNA-Glu-CTC_5_end_1	ENSG00000109339|ENST00000641385	152	-27.32	2	31	702	737	32	0.5938	0.625	ENSG00000109339|ENST00000641385	mature-tRNA-Glu-CTC_5_end_1	0	19	24	19	24	11412	6mer	x	6mer	0		0	MAPK10	protein_coding
ENSG00000114786	mature-tRNA-Glu-CTC_5_end_1	ENSG00000114786|ENST00000637025	174	-32.2	2	28	4	39	29	0.6207	0.7931	ENSG00000114786|ENST00000637025	mature-tRNA-Glu-CTC_5_end_1	0	52	57	52	57	11416	6mer	x	6mer	0		0	ABHD14A-ACY1	protein_coding
ENSG00000104763	mature-tRNA-Gly-GCC_5_end_5	ENSG00000104763|ENST00000636128	159	-20.51	2	31	124	155	30	0.6333	0.6667	ENSG00000104763|ENST00000636128	mature-tRNA-Gly-GCC_5_end_5	0	48	53	48	53	11448	6mer	x	6mer	0		0	ASAH1	protein_coding
ENSG00000109339	mature-tRNA-Glu-CTC_5_end_1	ENSG00000109339|ENST00000641032	152	-27.32	2	31	856	891	32	0.5938	0.625	ENSG00000109339|ENST00000641032	mature-tRNA-Glu-CTC_5_end_1	0	17	22	17	22	11477	6mer	x	6mer	0		0	MAPK10	protein_coding
ENSG00000116641	mature-tRNA-Gly-CCC_5_end_1	ENSG00000116641|ENST00000634223	157	-21.31	2	26	114	143	26	0.6154	0.8077	ENSG00000116641|ENST00000634223	mature-tRNA-Gly-CCC_5_end_1	0	17	23	17	23	11482	7mer-m8	x	7mer-m8	0		0	DOCK7	protein_coding
ENSG00000116641	mature-tRNA-Gly-GCC_5_end_1	ENSG00000116641|ENST00000634223	157	-21.71	2	26	113	143	26	0.6154	0.8077	ENSG00000116641|ENST00000634223	mature-tRNA-Gly-GCC_5_end_1	0	17	23	17	23	11483	7mer-m8	x	7mer-m8	0		0	DOCK7	protein_coding
ENSG00000116641	mature-tRNA-Gly-GCC_5_end_2	ENSG00000116641|ENST00000634223	157	-22.57	2	26	111	143	26	0.6154	0.8077	ENSG00000116641|ENST00000634223	mature-tRNA-Gly-GCC_5_end_2	0	17	23	17	23	11484	7mer-m8	x	7mer-m8	0		0	DOCK7	protein_coding
ENSG00000116641	mature-tRNA-Gly-GCC_5_end_3	ENSG00000116641|ENST00000634223	157	-25.84	2	26	110	143	26	0.6154	0.8077	ENSG00000116641|ENST00000634223	mature-tRNA-Gly-GCC_5_end_3	0	17	23	17	23	11485	7mer-m8	x	7mer-m8	0		0	DOCK7	protein_coding
ENSG00000116641	mature-tRNA-Gly-GCC_5_end_4	ENSG00000116641|ENST00000634223	157	-26.11	2	26	109	143	26	0.6154	0.8077	ENSG00000116641|ENST00000634223	mature-tRNA-Gly-GCC_5_end_4	0	17	23	17	23	11486	7mer-m8	x	7mer-m8	0		0	DOCK7	protein_coding
ENSG00000186184	mature-tRNA-Gly-GCC_5_end_5	ENSG00000186184|ENST00000636817	155	-24.32	2	30	1989	2018	30	0.6333	0.6667	ENSG00000186184|ENST00000636817	mature-tRNA-Gly-GCC_5_end_5	0	32	38	32	38	11501	7mer-m8	x	7mer-m8	0		0	POLR1D	protein_coding
ENSG00000174667	mature-tRNA-Glu-TTC_5_end_1	ENSG00000174667|ENST00000641669	147	-20.87	2	25	76	110	25	0.52	0.72	ENSG00000174667|ENST00000641669	mature-tRNA-Glu-TTC_5_end_1	0	48	53	48	53	11521	6mer	x	6mer	0		0	OR7D4	protein_coding
ENSG00000164199	mature-tRNA-Glu-CTC_5_end_1	ENSG00000164199|ENST00000638990	154	-32.01	2	32	1679	1712	31	0.5484	0.6452	ENSG00000164199|ENST00000638990	mature-tRNA-Glu-CTC_5_end_1	0	30	35	30	35	11522	6mer	x	6mer	0		0	ADGRV1	protein_coding
ENSG00000165699	mature-tRNA-Glu-CTC_5_end_1	ENSG00000165699|ENST00000644997	157	-26.86	2	32	596	630	32	0.4688	0.7812	ENSG00000165699|ENST00000644997	mature-tRNA-Glu-CTC_5_end_1	0	49	54	49	54	11543	6mer	x	6mer	0		0	TSC1	protein_coding
ENSG00000100150	mature-tRNA-Glu-CTC_5_end_1	ENSG00000100150|ENST00000645755	161	-33.51	2	32	683	714	30	0.6	0.6667	ENSG00000100150|ENST00000645755	mature-tRNA-Glu-CTC_5_end_1	0	24	29	24	29	11633	6mer	x	6mer	0		0	DEPDC5	protein_coding
ENSG00000100150	mature-tRNA-Glu-CTC_5_end_2	ENSG00000100150|ENST00000645755	158	-28.78	2	23	685	714	21	0.6667	0.7143	ENSG00000100150|ENST00000645755	mature-tRNA-Glu-CTC_5_end_2	0	24	29	24	29	11634	6mer	x	6mer	0		0	DEPDC5	protein_coding
ENSG00000100150	mature-tRNA-Glu-CTC_5_end_3	ENSG00000100150|ENST00000645755	159	-28.78	2	30	685	714	28	0.6071	0.6786	ENSG00000100150|ENST00000645755	mature-tRNA-Glu-CTC_5_end_3	0	24	29	24	29	11635	6mer	x	6mer	0		0	DEPDC5	protein_coding
ENSG00000100150	mature-tRNA-Glu-CTC_5_end_4	ENSG00000100150|ENST00000645755	161	-30.92	2	32	683	714	30	0.6	0.6667	ENSG00000100150|ENST00000645755	mature-tRNA-Glu-CTC_5_end_4	0	24	29	24	29	11636	6mer	x	6mer	0		0	DEPDC5	protein_coding
ENSG00000100150	mature-tRNA-Glu-CTC_5_end_1	ENSG00000100150|ENST00000642684	182	-41.03	2	32	1959	1988	30	0.7333	0.7667	ENSG00000100150|ENST00000642684	mature-tRNA-Glu-CTC_5_end_1	0	30	35	30	35	11674	6mer	x	6mer	0		0	DEPDC5	protein_coding
ENSG00000100150	mature-tRNA-Glu-CTC_5_end_2	ENSG00000100150|ENST00000642684	158	-28.78	2	23	1384	1413	21	0.6667	0.7143	ENSG00000100150|ENST00000642684	mature-tRNA-Glu-CTC_5_end_2	0	30	35	30	35	11675	6mer	x	6mer	0		0	DEPDC5	protein_coding
ENSG00000100150	mature-tRNA-Glu-CTC_5_end_3	ENSG00000100150|ENST00000642684	159	-28.78	2	30	1384	1413	28	0.6071	0.6786	ENSG00000100150|ENST00000642684	mature-tRNA-Glu-CTC_5_end_3	0	30	35	30	35	11676	6mer	x	6mer	0		0	DEPDC5	protein_coding
ENSG00000100150	mature-tRNA-Glu-CTC_5_end_4	ENSG00000100150|ENST00000642684	161	-30.92	2	32	1382	1413	30	0.6	0.6667	ENSG00000100150|ENST00000642684	mature-tRNA-Glu-CTC_5_end_4	0	30	35	30	35	11677	6mer	x	6mer	0		0	DEPDC5	protein_coding
ENSG00000049130	mature-tRNA-Gly-GCC_5_end_5	ENSG00000049130|ENST00000646633	153	-18.94	2	23	1444	1472	21	0.7143	0.7619	ENSG00000049130|ENST00000646633	mature-tRNA-Gly-GCC_5_end_5	0	34	41	34	41	11678	8mer-1a	x	8mer-1a	0		0	KITLG	protein_coding
ENSG00000006071	mature-tRNA-Glu-CTC_5_end_1	ENSG00000006071|ENST00000646003	142	-26.79	2	11	2442	2474	9	0.8889	0.8889	ENSG00000006071|ENST00000646003	mature-tRNA-Glu-CTC_5_end_1	0	36	41	36	41	11681	6mer	x	6mer	0		0	ABCC8	protein_coding
ENSG00000132849	mature-tRNA-Gly-GCC_5_end_5	ENSG00000132849|ENST00000646453	166	-22.32	2	28	700	734	29	0.6552	0.6897	ENSG00000132849|ENST00000646453	mature-tRNA-Gly-GCC_5_end_5	0	50	56	50	56	11702	7mer-m8	x	7mer-m8	0		0	PATJ	protein_coding
ENSG00000147044	mature-tRNA-Gly-GCC_5_end_5	ENSG00000147044|ENST00000644347	156	-15.82	2	28	3087	3122	30	0.6333	0.7	ENSG00000147044|ENST00000644347	mature-tRNA-Gly-GCC_5_end_5	0	35	40	35	40	11736	6mer	x	6mer	0		0	CASK	protein_coding
ENSG00000112855	mature-tRNA-Glu-TTC_5_end_1	ENSG00000112855|ENST00000642452	155	-29.25	2	32	422	449	30	0.6	0.7333	ENSG00000112855|ENST00000642452	mature-tRNA-Glu-TTC_5_end_1	0	33	39	33	39	11743	7mer-1a	x	7mer-1a	0		0	HARS2	protein_coding
ENSG00000168036	mature-tRNA-Gly-GCC_5_end_5	ENSG00000168036|ENST00000645900	149	-19.76	2	23	462	494	22	0.6364	0.6818	ENSG00000168036|ENST00000645900	mature-tRNA-Gly-GCC_5_end_5	0	18	24	18	24	11772	7mer-m8	x	7mer-m8	0		0	CTNNB1	protein_coding
ENSG00000108641	mature-tRNA-Gly-GCC_5_end_5	ENSG00000108641|ENST00000647252	161	-21.93	2	31	12	44	30	0.6	0.6667	ENSG00000108641|ENST00000647252	mature-tRNA-Gly-GCC_5_end_5	0	39	44	39	44	11845	6mer	x	6mer	0		0	B9D1	protein_coding
ENSG00000256029	mature-tRNA-Glu-CTC_5_end_1	ENSG00000256029|ENST00000645519	172	-31.54	2	25	5052	5084	23	0.6957	0.7826	ENSG00000256029|ENST00000645519	mature-tRNA-Glu-CTC_5_end_1	0	25	30	25	30	11847	6mer	x	6mer	0		0	AL590560.2	protein_coding
ENSG00000256029	mature-tRNA-Glu-CTC_5_end_2	ENSG00000256029|ENST00000645519	172	-29.26	2	25	5055	5084	23	0.6957	0.7826	ENSG00000256029|ENST00000645519	mature-tRNA-Glu-CTC_5_end_2	0	25	30	25	30	11848	6mer	x	6mer	0		0	AL590560.2	protein_coding
ENSG00000256029	mature-tRNA-Glu-CTC_5_end_3	ENSG00000256029|ENST00000645519	172	-30.32	2	25	5054	5084	23	0.6957	0.7826	ENSG00000256029|ENST00000645519	mature-tRNA-Glu-CTC_5_end_3	0	25	30	25	30	11849	6mer	x	6mer	0		0	AL590560.2	protein_coding
ENSG00000256029	mature-tRNA-Glu-CTC_5_end_4	ENSG00000256029|ENST00000645519	172	-32.25	2	25	5052	5084	23	0.6957	0.7826	ENSG00000256029|ENST00000645519	mature-tRNA-Glu-CTC_5_end_4	0	25	30	25	30	11850	6mer	x	6mer	0		0	AL590560.2	protein_coding
ENSG00000185010	mature-tRNA-Gly-GCC_5_end_5	ENSG00000185010|ENST00000644698	168	-20.97	2	31	1495	1525	29	0.5862	0.7586	ENSG00000185010|ENST00000644698	mature-tRNA-Gly-GCC_5_end_5	0	39	45	39	45	11861	7mer-m8	x	7mer-m8	0		0	F8	protein_coding
ENSG00000134897	mature-tRNA-Glu-CTC_5_end_1	ENSG00000134897|ENST00000651855	158	-28.27	2	21	1544	1575	19	0.6842	0.8421	ENSG00000134897|ENST00000651855	mature-tRNA-Glu-CTC_5_end_1	0	26	31	26	31	11865	6mer	x	6mer	0		0	BIVM	protein_coding
ENSG00000134897	mature-tRNA-Glu-CTC_5_end_2	ENSG00000134897|ENST00000651855	154	-25.21	2	21	1547	1575	19	0.6316	0.8421	ENSG00000134897|ENST00000651855	mature-tRNA-Glu-CTC_5_end_2	0	26	31	26	31	11866	6mer	x	6mer	0		0	BIVM	protein_coding
ENSG00000134897	mature-tRNA-Glu-CTC_5_end_3	ENSG00000134897|ENST00000651855	154	-25.95	2	21	1546	1575	19	0.6316	0.8421	ENSG00000134897|ENST00000651855	mature-tRNA-Glu-CTC_5_end_3	0	26	31	26	31	11867	6mer	x	6mer	0		0	BIVM	protein_coding
ENSG00000134897	mature-tRNA-Glu-CTC_5_end_4	ENSG00000134897|ENST00000651855	154	-26.19	2	21	1544	1575	19	0.6316	0.8421	ENSG00000134897|ENST00000651855	mature-tRNA-Glu-CTC_5_end_4	0	26	31	26	31	11868	6mer	x	6mer	0		0	BIVM	protein_coding
ENSG00000100014	mature-tRNA-Glu-CTC_5_end_1	ENSG00000100014|ENST00000651059	162	-34.72	2	31	159	190	30	0.6333	0.7	ENSG00000100014|ENST00000651059	mature-tRNA-Glu-CTC_5_end_1	0	31	37	31	37	11890	7mer-1a	x	7mer-1a	0		0	SPECC1L	protein_coding
ENSG00000100014	mature-tRNA-Glu-CTC_5_end_2	ENSG00000100014|ENST00000651059	155	-34.52	2	19	160	190	19	0.7895	0.7895	ENSG00000100014|ENST00000651059	mature-tRNA-Glu-CTC_5_end_2	0	31	37	31	37	11891	7mer-1a	x	7mer-1a	0		0	SPECC1L	protein_coding
ENSG00000100014	mature-tRNA-Glu-CTC_5_end_3	ENSG00000100014|ENST00000651059	157	-34.69	2	30	161	190	29	0.6207	0.6897	ENSG00000100014|ENST00000651059	mature-tRNA-Glu-CTC_5_end_3	0	31	37	31	37	11892	7mer-1a	x	7mer-1a	0		0	SPECC1L	protein_coding
ENSG00000100014	mature-tRNA-Glu-CTC_5_end_4	ENSG00000100014|ENST00000651059	162	-34.83	2	31	159	190	30	0.6333	0.7	ENSG00000100014|ENST00000651059	mature-tRNA-Glu-CTC_5_end_4	0	31	37	31	37	11893	7mer-1a	x	7mer-1a	0		0	SPECC1L	protein_coding
ENSG00000104343	mature-tRNA-Glu-TTC_5_end_1	ENSG00000104343|ENST00000650817	155	-25.96	2	28	7076	7111	30	0.6	0.7333	ENSG00000104343|ENST00000650817	mature-tRNA-Glu-TTC_5_end_1	0	32	37	32	37	11898	6mer	x	6mer	0		0	UBE2W	protein_coding
ENSG00000156650	mature-tRNA-Glu-CTC_5_end_1	ENSG00000156650|ENST00000649442	163	-30.16	2	32	1639	1671	30	0.5333	0.7	ENSG00000156650|ENST00000649442	mature-tRNA-Glu-CTC_5_end_1	0	37	44	37	44	11957	8mer-1a	x	8mer-1a	0		0	KAT6B	protein_coding
ENSG00000173193	mature-tRNA-Glu-TTC_5_end_1	ENSG00000173193|ENST00000649945	164	-27.88	2	32	2922	2950	30	0.6667	0.7333	ENSG00000173193|ENST00000649945	mature-tRNA-Glu-TTC_5_end_1	0	15	20	15	20	11990	6mer	x	6mer	0		0	PARP14	protein_coding
ENSG00000175445	mature-tRNA-Gly-CCC_5_end_1	ENSG00000175445|ENST00000650478	152	-16.62	2	22	1705	1734	21	0.6667	0.7143	ENSG00000175445|ENST00000650478	mature-tRNA-Gly-CCC_5_end_1	0	28	34	28	34	11991	7mer-1a	x	7mer-1a	0		0	LPL	protein_coding
ENSG00000175445	mature-tRNA-Gly-GCC_5_end_1	ENSG00000175445|ENST00000650478	152	-19.12	2	22	1703	1734	21	0.6667	0.7143	ENSG00000175445|ENST00000650478	mature-tRNA-Gly-GCC_5_end_1	0	28	34	28	34	11992	7mer-1a	x	7mer-1a	0		0	LPL	protein_coding
ENSG00000175445	mature-tRNA-Gly-GCC_5_end_2	ENSG00000175445|ENST00000650478	152	-19.24	2	22	1702	1734	21	0.6667	0.7143	ENSG00000175445|ENST00000650478	mature-tRNA-Gly-GCC_5_end_2	0	28	34	28	34	11993	7mer-1a	x	7mer-1a	0		0	LPL	protein_coding
ENSG00000175445	mature-tRNA-Gly-GCC_5_end_3	ENSG00000175445|ENST00000650478	153	-20.17	2	32	1700	1734	32	0.5625	0.6562	ENSG00000175445|ENST00000650478	mature-tRNA-Gly-GCC_5_end_3	0	28	34	28	34	11994	7mer-1a	x	7mer-1a	0		0	LPL	protein_coding
ENSG00000175445	mature-tRNA-Gly-GCC_5_end_4	ENSG00000175445|ENST00000650478	158	-21.41	2	33	1699	1734	33	0.5758	0.6667	ENSG00000175445|ENST00000650478	mature-tRNA-Gly-GCC_5_end_4	0	28	34	28	34	11995	7mer-1a	x	7mer-1a	0		0	LPL	protein_coding
ENSG00000215717	mature-tRNA-Glu-TTC_5_end_1	ENSG00000215717|ENST00000651489	159	-30.08	2	32	36	67	31	0.5806	0.7097	ENSG00000215717|ENST00000651489	mature-tRNA-Glu-TTC_5_end_1	0	32	38	32	38	12030	7mer-1a	x	7mer-1a	0		0	TMEM167B	protein_coding
ENSG00000087274	mature-tRNA-Glu-TTC_5_end_1	ENSG00000087274|ENST00000651918	153	-33.15	2	31	1470	1506	34	0.5882	0.7059	ENSG00000087274|ENST00000651918	mature-tRNA-Glu-TTC_5_end_1	0	15	20	15	20	12053	6mer	x	6mer	0		0	ADD1	protein_coding
ENSG00000082438	mature-tRNA-Gly-GCC_5_end_5	ENSG00000082438|ENST00000652658	173	-16.97	2	28	4203	4233	26	0.6923	0.7692	ENSG00000082438|ENST00000652658	mature-tRNA-Gly-GCC_5_end_5	0	21	26	21	26	12059	6mer	x	6mer	0		0	COBLL1	protein_coding
ENSG00000116133	mature-tRNA-Glu-TTC_5_end_1	ENSG00000116133|ENST00000649769	152	-34.59	2	32	2403	2441	36	0.5556	0.6667	ENSG00000116133|ENST00000649769	mature-tRNA-Glu-TTC_5_end_1	0	25	30	25	30	12068	6mer	x	6mer	0		0	DHCR24	protein_coding
ENSG00000286132	mature-tRNA-Glu-TTC_5_end_1	ENSG00000286132|ENST00000651606	184	-26.29	2	30	2083	2116	29	0.7241	0.7586	ENSG00000286132|ENST00000651606	mature-tRNA-Glu-TTC_5_end_1	0	31	37	31	37	12074	7mer-1a	x	7mer-1a	0		0	AC022415.2	protein_coding
ENSG00000128513	mature-tRNA-Gly-GCC_5_end_5	ENSG00000128513|ENST00000664330	159	-14.99	2	26	1666	1695	25	0.72	0.76	ENSG00000128513|ENST00000664330	mature-tRNA-Gly-GCC_5_end_5	0	21	26	21	26	12087	6mer	x	6mer	0		0	POT1	protein_coding
ENSG00000162601	mature-tRNA-Glu-CTC_5_end_1	ENSG00000162601|ENST00000659108	150	-27.47	2	29	4322	4356	29	0.5172	0.7241	ENSG00000162601|ENST00000659108	mature-tRNA-Glu-CTC_5_end_1	0	37	42	37	42	12103	6mer	x	6mer	0		0	MYSM1	protein_coding
ENSG00000162601	mature-tRNA-Glu-CTC_5_end_2	ENSG00000162601|ENST00000659108	146	-21.85	2	29	4325	4356	29	0.4828	0.7241	ENSG00000162601|ENST00000659108	mature-tRNA-Glu-CTC_5_end_2	0	37	42	37	42	12104	6mer	x	6mer	0		0	MYSM1	protein_coding
ENSG00000162601	mature-tRNA-Glu-CTC_5_end_3	ENSG00000162601|ENST00000659108	146	-21.85	2	29	4324	4356	29	0.4828	0.7241	ENSG00000162601|ENST00000659108	mature-tRNA-Glu-CTC_5_end_3	0	37	42	37	42	12105	6mer	x	6mer	0		0	MYSM1	protein_coding
ENSG00000162601	mature-tRNA-Glu-CTC_5_end_4	ENSG00000162601|ENST00000659108	146	-25.55	2	29	4322	4356	29	0.4828	0.7241	ENSG00000162601|ENST00000659108	mature-tRNA-Glu-CTC_5_end_4	0	37	42	37	42	12106	6mer	x	6mer	0		0	MYSM1	protein_coding
ENSG00000164362	mature-tRNA-Glu-CTC_5_end_1	ENSG00000164362|ENST00000656021	165	-33.55	2	31	2007	2036	29	0.6552	0.7241	ENSG00000164362|ENST00000656021	mature-tRNA-Glu-CTC_5_end_1	0	52	58	52	58	12119	7mer-1a	x	7mer-1a	0		0	TERT	protein_coding
ENSG00000251322	mature-tRNA-Glu-CTC_5_end_1	ENSG00000251322|ENST00000664402	184	-48.74	2	32	962	999	35	0.6286	0.8286	ENSG00000251322|ENST00000664402	mature-tRNA-Glu-CTC_5_end_1	0	20	25	20	25	12128	6mer	x	6mer	0		0	SHANK3	protein_coding
ENSG00000251322	mature-tRNA-Glu-CTC_5_end_2	ENSG00000251322|ENST00000664402	178	-42.67	2	24	967	999	25	0.68	0.88	ENSG00000251322|ENST00000664402	mature-tRNA-Glu-CTC_5_end_2	0	20	25	20	25	12129	6mer	x	6mer	0		0	SHANK3	protein_coding
ENSG00000251322	mature-tRNA-Glu-CTC_5_end_3	ENSG00000251322|ENST00000664402	178	-42.8	2	24	966	999	25	0.68	0.88	ENSG00000251322|ENST00000664402	mature-tRNA-Glu-CTC_5_end_3	0	20	25	20	25	12130	6mer	x	6mer	0		0	SHANK3	protein_coding
ENSG00000251322	mature-tRNA-Glu-CTC_5_end_4	ENSG00000251322|ENST00000664402	180	-46.45	2	32	962	999	35	0.6	0.8286	ENSG00000251322|ENST00000664402	mature-tRNA-Glu-CTC_5_end_4	0	20	25	20	25	12131	6mer	x	6mer	0		0	SHANK3	protein_coding
ENSG00000128513	mature-tRNA-Gly-GCC_5_end_5	ENSG00000128513|ENST00000657892	159	-14.99	2	26	1684	1713	25	0.72	0.76	ENSG00000128513|ENST00000657892	mature-tRNA-Gly-GCC_5_end_5	0	15	20	15	20	12132	6mer	x	6mer	0		0	POT1	protein_coding
ENSG00000092847	mature-tRNA-Glu-TTC_5_end_1	ENSG00000092847|ENST00000674304	171	-35.34	2	25	1627	1663	27	0.6667	0.7778	ENSG00000092847|ENST00000674304	mature-tRNA-Glu-TTC_5_end_1	0	49	55	49	55	12149	7mer-1a	x	7mer-1a	0		0	AGO1	protein_coding
ENSG00000145362	mature-tRNA-Gly-GCC_5_end_5	ENSG00000145362|ENST00000672366	158	-17.63	2	25	1707	1741	26	0.6923	0.6923	ENSG00000145362|ENST00000672366	mature-tRNA-Gly-GCC_5_end_5	0	28	34	28	34	12151	7mer-m8	x	7mer-m8	0		0	ANK2	protein_coding
ENSG00000069424	mature-tRNA-Glu-CTC_5_end_1	ENSG00000069424|ENST00000671676	149	-33.09	2	21	454	484	19	0.6316	0.7895	ENSG00000069424|ENST00000671676	mature-tRNA-Glu-CTC_5_end_1	0	38	44	38	44	12164	7mer-1a	x	7mer-1a	0		0	KCNAB2	protein_coding
ENSG00000145362	mature-tRNA-Gly-GCC_5_end_5	ENSG00000145362|ENST00000672088	158	-17.63	2	25	1707	1741	26	0.6923	0.6923	ENSG00000145362|ENST00000672088	mature-tRNA-Gly-GCC_5_end_5	0	41	46	41	46	12168	6mer	x	6mer	0		0	ANK2	protein_coding
ENSG00000160072	mature-tRNA-Glu-TTC_5_end_1	ENSG00000160072|ENST00000673477	163	-30.25	2	32	616	650	33	0.6061	0.7273	ENSG00000160072|ENST00000673477	mature-tRNA-Glu-TTC_5_end_1	0	49	54	49	54	12169	6mer	x	6mer	0		0	ATAD3B	protein_coding
ENSG00000173559	mature-tRNA-Gly-GCC_5_end_5	ENSG00000173559|ENST00000674172	151	-17.3	2	21	6008	6040	20	0.65	0.75	ENSG00000173559|ENST00000674172	mature-tRNA-Gly-GCC_5_end_5	0	43	49	43	49	12195	7mer-1a	x	7mer-1a	0		0	NABP1	protein_coding
ENSG00000145362	mature-tRNA-Gly-GCC_5_end_5	ENSG00000145362|ENST00000672356	158	-17.63	2	25	1707	1741	26	0.6923	0.6923	ENSG00000145362|ENST00000672356	mature-tRNA-Gly-GCC_5_end_5	0	29	34	29	34	12202	6mer	x	6mer	0		0	ANK2	protein_coding
ENSG00000288558	mature-tRNA-Glu-CTC_5_end_1	ENSG00000288558|ENST00000674062	151	-26.58	2	27	5476	5506	25	0.48	0.8	ENSG00000288558|ENST00000674062	mature-tRNA-Glu-CTC_5_end_1	0	23	28	23	28	12222	6mer	x	6mer	0		0	DUS4L-BCAP29	protein_coding
ENSG00000288558	mature-tRNA-Glu-CTC_5_end_2	ENSG00000288558|ENST00000674062	155	-21.88	2	27	5479	5506	25	0.52	0.8	ENSG00000288558|ENST00000674062	mature-tRNA-Glu-CTC_5_end_2	0	23	28	23	28	12223	6mer	x	6mer	0		0	DUS4L-BCAP29	protein_coding
ENSG00000288558	mature-tRNA-Glu-CTC_5_end_3	ENSG00000288558|ENST00000674062	155	-21.88	2	27	5478	5506	25	0.52	0.8	ENSG00000288558|ENST00000674062	mature-tRNA-Glu-CTC_5_end_3	0	23	28	23	28	12224	6mer	x	6mer	0		0	DUS4L-BCAP29	protein_coding
ENSG00000288558	mature-tRNA-Glu-CTC_5_end_4	ENSG00000288558|ENST00000674062	155	-23.89	2	27	5476	5506	25	0.52	0.8	ENSG00000288558|ENST00000674062	mature-tRNA-Glu-CTC_5_end_4	0	23	28	23	28	12225	6mer	x	6mer	0		0	DUS4L-BCAP29	protein_coding
ENSG00000145362	mature-tRNA-Gly-GCC_5_end_5	ENSG00000145362|ENST00000672955	158	-17.63	2	25	1707	1741	26	0.6923	0.6923	ENSG00000145362|ENST00000672955	mature-tRNA-Gly-GCC_5_end_5	0	53	58	53	58	12243	6mer	x	6mer	0		0	ANK2	protein_coding
ENSG00000011451	mature-tRNA-Val-AAC_5_end_1	ENSG00000011451|ENST00000673675	156	-17.34	2	17	579	596	15	0.7333	0.8667	ENSG00000011451|ENST00000673675	mature-tRNA-Val-AAC_5_end_1	0	51	58	51	58	12276	8mer-1a	x	8mer-1a	0		0	WIZ	protein_coding
ENSG00000011451	mature-tRNA-Val-CAC_5_end_1	ENSG00000011451|ENST00000673675	171	-21.92	2	28	566	596	26	0.6923	0.8077	ENSG00000011451|ENST00000673675	mature-tRNA-Val-CAC_5_end_1	0	51	58	51	58	12277	8mer-1a	x	8mer-1a	0		0	WIZ	protein_coding
ENSG00000075975	mature-tRNA-Gly-GCC_5_end_5	ENSG00000075975|ENST00000676541	169	-25.03	2	27	1257	1294	31	0.6452	0.7097	ENSG00000075975|ENST00000676541	mature-tRNA-Gly-GCC_5_end_5	0	43	50	43	50	12322	8mer-1a	x	8mer-1a	0		0	MKRN2	protein_coding
ENSG00000150093	mature-tRNA-Glu-CTC_5_end_1	ENSG00000150093|ENST00000677310	145	-26.6	2	27	189	218	25	0.56	0.72	ENSG00000150093|ENST00000677310	mature-tRNA-Glu-CTC_5_end_1	0	45	50	45	50	12334	6mer	x	6mer	0		0	ITGB1	protein_coding
ENSG00000132002	mature-tRNA-Gly-GCC_5_end_5	ENSG00000132002|ENST00000676515	148	-20.31	2	31	1015	1042	29	0.5517	0.6897	ENSG00000132002|ENST00000676515	mature-tRNA-Gly-GCC_5_end_5	0	44	49	44	49	12346	6mer	x	6mer	0		0	DNAJB1	protein_coding
ENSG00000107862	mature-tRNA-Glu-TTC_5_end_1	ENSG00000107862|ENST00000678036	160	-24.53	2	32	300	332	31	0.6129	0.6774	ENSG00000107862|ENST00000678036	mature-tRNA-Glu-TTC_5_end_1	0	23	28	23	28	12364	6mer	x	6mer	0		0	GBF1	protein_coding
ENSG00000116688	mature-tRNA-Glu-TTC_5_end_1	ENSG00000116688|ENST00000675113	173	-34.43	2	31	32	65	30	0.6	0.7667	ENSG00000116688|ENST00000675113	mature-tRNA-Glu-TTC_5_end_1	0	34	39	34	39	12414	6mer	x	6mer	0		0	MFN2	protein_coding
ENSG00000138757	mature-tRNA-Gly-GCC_5_end_5	ENSG00000138757|ENST00000676974	154	-19.21	2	25	2167	2203	28	0.6071	0.7143	ENSG00000138757|ENST00000676974	mature-tRNA-Gly-GCC_5_end_5	0	55	60	55	60	12425	6mer	x	6mer	0		0	G3BP2	protein_coding
ENSG00000135316	mature-tRNA-Glu-TTC_5_end_1	ENSG00000135316|ENST00000678528	157	-25.23	2	21	1	21	20	0.7	0.85	ENSG00000135316|ENST00000678528	mature-tRNA-Glu-TTC_5_end_1	0	45	50	45	50	12428	6mer	x	6mer	0		0	SYNCRIP	protein_coding
ENSG00000117114	mature-tRNA-Gly-GCC_5_end_5	ENSG00000117114|ENST00000674492	157	-19.23	2	28	4819	4849	26	0.5769	0.7308	ENSG00000117114|ENST00000674492	mature-tRNA-Gly-GCC_5_end_5	0	39	45	39	45	12471	7mer-1a	x	7mer-1a	0		0	ADGRL2	protein_coding
ENSG00000116688	mature-tRNA-Glu-TTC_5_end_1	ENSG00000116688|ENST00000675053	173	-34.43	2	31	32	65	30	0.6	0.7667	ENSG00000116688|ENST00000675053	mature-tRNA-Glu-TTC_5_end_1	0	35	40	35	40	12498	6mer	x	6mer	0		0	MFN2	protein_coding
ENSG00000148356	mature-tRNA-Glu-TTC_5_end_1	ENSG00000148356|ENST00000676349	153	-33.2	2	31	2221	2250	31	0.6452	0.7097	ENSG00000148356|ENST00000676349	mature-tRNA-Glu-TTC_5_end_1	0	17	22	17	22	12513	6mer	x	6mer	0		0	LRSAM1	protein_coding
ENSG00000130714	mature-tRNA-Glu-CTC_5_end_1	ENSG00000130714|ENST00000677216	155	-27.79	2	31	301	333	30	0.6	0.6667	ENSG00000130714|ENST00000677216	mature-tRNA-Glu-CTC_5_end_1	0	29	34	29	34	12521	6mer	x	6mer	0		0	POMT1	protein_coding
ENSG00000130714	mature-tRNA-Glu-CTC_5_end_2	ENSG00000130714|ENST00000677216	150	-21.68	2	21	305	333	19	0.6842	0.7368	ENSG00000130714|ENST00000677216	mature-tRNA-Glu-CTC_5_end_2	0	29	34	29	34	12522	6mer	x	6mer	0		0	POMT1	protein_coding
ENSG00000130714	mature-tRNA-Glu-CTC_5_end_3	ENSG00000130714|ENST00000677216	151	-24.16	2	30	304	333	28	0.5714	0.6429	ENSG00000130714|ENST00000677216	mature-tRNA-Glu-CTC_5_end_3	0	29	34	29	34	12523	6mer	x	6mer	0		0	POMT1	protein_coding
ENSG00000130714	mature-tRNA-Glu-CTC_5_end_4	ENSG00000130714|ENST00000677216	155	-27.77	2	31	301	333	30	0.6	0.6667	ENSG00000130714|ENST00000677216	mature-tRNA-Glu-CTC_5_end_4	0	29	34	29	34	12524	6mer	x	6mer	0		0	POMT1	protein_coding
ENSG00000087053	mature-tRNA-Glu-CTC_5_end_1	ENSG00000087053|ENST00000675030	165	-26.43	2	32	6788	6816	30	0.6333	0.7333	ENSG00000087053|ENST00000675030	mature-tRNA-Glu-CTC_5_end_1	0	27	32	27	32	12534	6mer	x	6mer	0		0	MTMR2	protein_coding
ENSG00000130816	mature-tRNA-Glu-CTC_5_end_1	ENSG00000130816|ENST00000676610	172	-36.03	2	27	659	693	27	0.6667	0.8148	ENSG00000130816|ENST00000676610	mature-tRNA-Glu-CTC_5_end_1	0	16	22	16	22	12538	7mer-1a	x	7mer-1a	0		0	DNMT1	protein_coding
ENSG00000108641	mature-tRNA-Gly-GCC_5_end_5	ENSG00000108641|ENST00000675510	160	-20.01	2	31	955	984	30	0.6333	0.7333	ENSG00000108641|ENST00000675510	mature-tRNA-Gly-GCC_5_end_5	0	34	40	34	40	12566	7mer-1a	x	7mer-1a	0		0	B9D1	protein_coding
ENSG00000123815	mature-tRNA-Glu-CTC_5_end_1	ENSG00000123815|ENST00000679130	160	-30.68	2	28	205	233	26	0.7308	0.7308	ENSG00000123815|ENST00000679130	mature-tRNA-Glu-CTC_5_end_1	0	38	44	38	44	12610	7mer-1a	x	7mer-1a	0		0	COQ8B	protein_coding
ENSG00000183735	mature-tRNA-Glu-TTC_5_end_1	ENSG00000183735|ENST00000679050	161	-29.93	2	26	54	86	24	0.5833	0.75	ENSG00000183735|ENST00000679050	mature-tRNA-Glu-TTC_5_end_1	0	41	46	41	46	12614	6mer	x	6mer	0		0	TBK1	protein_coding
ENSG00000116539	mature-tRNA-Gly-CCC_5_end_1	ENSG00000116539|ENST00000679097	163	-21.54	2	24	1372	1397	22	0.6818	0.8182	ENSG00000116539|ENST00000679097	mature-tRNA-Gly-CCC_5_end_1	0	29	34	29	34	12615	6mer	x	6mer	0		0	ASH1L	protein_coding
ENSG00000116539	mature-tRNA-Gly-GCC_5_end_1	ENSG00000116539|ENST00000679097	163	-21.54	2	24	1371	1397	22	0.6818	0.8182	ENSG00000116539|ENST00000679097	mature-tRNA-Gly-GCC_5_end_1	0	29	34	29	34	12616	6mer	x	6mer	0		0	ASH1L	protein_coding
ENSG00000116539	mature-tRNA-Gly-GCC_5_end_2	ENSG00000116539|ENST00000679097	163	-21.54	2	24	1369	1397	22	0.6818	0.8182	ENSG00000116539|ENST00000679097	mature-tRNA-Gly-GCC_5_end_2	0	29	34	29	34	12617	6mer	x	6mer	0		0	ASH1L	protein_coding
ENSG00000116539	mature-tRNA-Gly-GCC_5_end_3	ENSG00000116539|ENST00000679097	163	-21.54	2	24	1368	1397	22	0.6818	0.8182	ENSG00000116539|ENST00000679097	mature-tRNA-Gly-GCC_5_end_3	0	29	34	29	34	12618	6mer	x	6mer	0		0	ASH1L	protein_coding
ENSG00000116539	mature-tRNA-Gly-GCC_5_end_4	ENSG00000116539|ENST00000679097	163	-21.77	2	24	1367	1397	22	0.6818	0.8182	ENSG00000116539|ENST00000679097	mature-tRNA-Gly-GCC_5_end_4	0	29	34	29	34	12619	6mer	x	6mer	0		0	ASH1L	protein_coding

## Sheet: L vs N
Table S5: Using miRanda and TargetScan softwares to predicte tsRNA potential targets.
ensemble_id	tsRNA	Target	Score	Energy_KcalMol	Query_Start	Query_End	Subject_Start	Subject_End	Aln_len	Subject_Identity	Query_Identity	a_Gene_ID	tsRNA_family_ID	species_ID	MSA_start	MSA_end	UTR_start	UTR_end	Group_num	Site_type	miRNA in this species	Group_type	Species_in_this_group	Species_in_this_group_with_this_site_type	ORF_overlap	gene_name	gene_type
ENSG00000070718	mature-tRNA-Glu-CTC_5_end_1	ENSG00000070718|ENST00000174653	159	-31.84	2	29	146	177	29	0.5862	0.6897	ENSG00000070718|ENST00000174653	mature-tRNA-Glu-CTC_5_end_1	0	33	38	33	38	22	6mer	x	6mer	0		0	AP3M2	protein_coding
ENSG00000070718	mature-tRNA-Glu-CTC_5_end_2	ENSG00000070718|ENST00000174653	159	-31.84	2	29	145	177	29	0.5862	0.6897	ENSG00000070718|ENST00000174653	mature-tRNA-Glu-CTC_5_end_2	0	33	38	33	38	23	6mer	x	6mer	0		0	AP3M2	protein_coding
ENSG00000070718	mature-tRNA-Glu-CTC_5_end_3	ENSG00000070718|ENST00000174653	159	-31.84	2	29	144	177	29	0.5862	0.6897	ENSG00000070718|ENST00000174653	mature-tRNA-Glu-CTC_5_end_3	0	33	38	33	38	24	6mer	x	6mer	0		0	AP3M2	protein_coding
ENSG00000100422	mature-tRNA-Gly-GCC_5_end_1	ENSG00000100422|ENST00000216264	156	-26.66	2	29	1516	1550	33	0.6061	0.697	ENSG00000100422|ENST00000216264	mature-tRNA-Gly-GCC_5_end_1	0	41	47	41	47	42	7mer-1a	x	7mer-1a	0		0	CERK	protein_coding
ENSG00000100422	mature-tRNA-Gly-GCC_5_end_2	ENSG00000100422|ENST00000216264	157	-27.08	2	32	723	762	37	0.5676	0.6486	ENSG00000100422|ENST00000216264	mature-tRNA-Gly-GCC_5_end_2	0	41	47	41	47	43	7mer-1a	x	7mer-1a	0		0	CERK	protein_coding
ENSG00000100422	mature-tRNA-Gly-GCC_5_end_3	ENSG00000100422|ENST00000216264	157	-29.11	2	32	722	762	37	0.5676	0.6486	ENSG00000100422|ENST00000216264	mature-tRNA-Gly-GCC_5_end_3	0	41	47	41	47	44	7mer-1a	x	7mer-1a	0		0	CERK	protein_coding
ENSG00000100678	mature-tRNA-Glu-TTC_5_end_1	ENSG00000100678|ENST00000216568	151	-24.79	2	32	1412	1443	31	0.5806	0.6452	ENSG00000100678|ENST00000216568	mature-tRNA-Glu-TTC_5_end_1	0	37	43	37	43	65	7mer-m8	x	7mer-m8	0		0	SLC8A3	protein_coding
ENSG00000100678	mature-tRNA-Glu-TTC_5_end_2	ENSG00000100678|ENST00000216568	151	-24.79	2	32	1411	1443	31	0.5806	0.6452	ENSG00000100678|ENST00000216568	mature-tRNA-Glu-TTC_5_end_2	0	37	43	37	43	66	7mer-m8	x	7mer-m8	0		0	SLC8A3	protein_coding
ENSG00000229809	mature-tRNA-Glu-CTC_5_end_1	ENSG00000229809|ENST00000223459	154	-26.1	2	30	337	370	30	0.5333	0.7333	ENSG00000229809|ENST00000223459	mature-tRNA-Glu-CTC_5_end_1	0	28	33	28	33	79	6mer	x	6mer	0		0	ZNF688	protein_coding
ENSG00000229809	mature-tRNA-Glu-CTC_5_end_2	ENSG00000229809|ENST00000223459	150	-25.86	2	30	339	370	30	0.5	0.7333	ENSG00000229809|ENST00000223459	mature-tRNA-Glu-CTC_5_end_2	0	28	33	28	33	80	6mer	x	6mer	0		0	ZNF688	protein_coding
ENSG00000229809	mature-tRNA-Glu-CTC_5_end_3	ENSG00000229809|ENST00000223459	150	-26.1	2	30	338	370	30	0.5	0.7333	ENSG00000229809|ENST00000223459	mature-tRNA-Glu-CTC_5_end_3	0	28	33	28	33	81	6mer	x	6mer	0		0	ZNF688	protein_coding
ENSG00000101986	mature-tRNA-Glu-CTC_5_end_1	ENSG00000101986|ENST00000218104	168	-32.51	2	31	851	882	29	0.5862	0.7586	ENSG00000101986|ENST00000218104	mature-tRNA-Glu-CTC_5_end_1	0	53	58	53	58	132	6mer	x	6mer	0		0	ABCD1	protein_coding
ENSG00000101986	mature-tRNA-Glu-CTC_5_end_2	ENSG00000101986|ENST00000218104	163	-30.56	2	30	853	882	28	0.5714	0.75	ENSG00000101986|ENST00000218104	mature-tRNA-Glu-CTC_5_end_2	0	53	58	53	58	133	6mer	x	6mer	0		0	ABCD1	protein_coding
ENSG00000101986	mature-tRNA-Glu-CTC_5_end_3	ENSG00000101986|ENST00000218104	168	-30.56	2	31	852	882	29	0.5862	0.7586	ENSG00000101986|ENST00000218104	mature-tRNA-Glu-CTC_5_end_3	0	53	58	53	58	134	6mer	x	6mer	0		0	ABCD1	protein_coding
ENSG00000106336	mature-tRNA-Glu-CTC_5_end_1	ENSG00000106336|ENST00000241071	150	-26.76	2	28	100	128	26	0.5769	0.6923	ENSG00000106336|ENST00000241071	mature-tRNA-Glu-CTC_5_end_1	0	35	40	35	40	175	6mer	x	6mer	0		0	FBXO24	protein_coding
ENSG00000106336	mature-tRNA-Glu-CTC_5_end_2	ENSG00000106336|ENST00000241071	146	-22.47	2	28	102	128	26	0.5385	0.6923	ENSG00000106336|ENST00000241071	mature-tRNA-Glu-CTC_5_end_2	0	35	40	35	40	176	6mer	x	6mer	0		0	FBXO24	protein_coding
ENSG00000106336	mature-tRNA-Glu-CTC_5_end_3	ENSG00000106336|ENST00000241071	146	-23.96	2	28	101	128	26	0.5385	0.6923	ENSG00000106336|ENST00000241071	mature-tRNA-Glu-CTC_5_end_3	0	35	40	35	40	177	6mer	x	6mer	0		0	FBXO24	protein_coding
ENSG00000091157	mature-tRNA-Glu-TTC_5_end_1	ENSG00000091157|ENST00000254442	158	-25.64	2	32	1064	1093	30	0.5667	0.7333	ENSG00000091157|ENST00000254442	mature-tRNA-Glu-TTC_5_end_1	0	42	47	42	47	256	6mer	x	6mer	0		0	WDR7	protein_coding
ENSG00000091157	mature-tRNA-Glu-TTC_5_end_2	ENSG00000091157|ENST00000254442	158	-25.64	2	32	1063	1093	30	0.5667	0.7333	ENSG00000091157|ENST00000254442	mature-tRNA-Glu-TTC_5_end_2	0	42	47	42	47	257	6mer	x	6mer	0		0	WDR7	protein_coding
ENSG00000131089	mature-tRNA-Gly-GCC_5_end_1	ENSG00000131089|ENST00000253401	151	-19.88	2	30	228	258	28	0.5357	0.6786	ENSG00000131089|ENST00000253401	mature-tRNA-Gly-GCC_5_end_1	0	44	49	44	49	271	6mer	x	6mer	0		0	ARHGEF9	protein_coding
ENSG00000131089	mature-tRNA-Gly-GCC_5_end_2	ENSG00000131089|ENST00000253401	151	-21.49	2	30	227	258	28	0.5357	0.6786	ENSG00000131089|ENST00000253401	mature-tRNA-Gly-GCC_5_end_2	0	44	49	44	49	272	6mer	x	6mer	0		0	ARHGEF9	protein_coding
ENSG00000131089	mature-tRNA-Gly-GCC_5_end_3	ENSG00000131089|ENST00000253401	151	-24.05	2	30	226	258	28	0.5357	0.6786	ENSG00000131089|ENST00000253401	mature-tRNA-Gly-GCC_5_end_3	0	44	49	44	49	273	6mer	x	6mer	0		0	ARHGEF9	protein_coding
ENSG00000038532	mature-tRNA-Glu-CTC_5_end_1	ENSG00000038532|ENST00000261657	176	-40.07	2	31	1686	1721	32	0.6875	0.7188	ENSG00000038532|ENST00000261657	mature-tRNA-Glu-CTC_5_end_1	0	39	45	39	45	330	7mer-1a	x	7mer-1a	0		0	CLEC16A	protein_coding
ENSG00000038532	mature-tRNA-Glu-CTC_5_end_2	ENSG00000038532|ENST00000261657	171	-39.22	2	30	1688	1721	31	0.6774	0.7097	ENSG00000038532|ENST00000261657	mature-tRNA-Glu-CTC_5_end_2	0	39	45	39	45	331	7mer-1a	x	7mer-1a	0		0	CLEC16A	protein_coding
ENSG00000038532	mature-tRNA-Glu-CTC_5_end_3	ENSG00000038532|ENST00000261657	176	-39.22	2	31	1687	1721	32	0.6875	0.7188	ENSG00000038532|ENST00000261657	mature-tRNA-Glu-CTC_5_end_3	0	39	45	39	45	332	7mer-1a	x	7mer-1a	0		0	CLEC16A	protein_coding
ENSG00000091622	mature-tRNA-Glu-CTC_5_end_1	ENSG00000091622|ENST00000262483	159	-24.79	2	28	2411	2442	27	0.5926	0.7778	ENSG00000091622|ENST00000262483	mature-tRNA-Glu-CTC_5_end_1	0	44	49	44	49	340	6mer	x	6mer	0		0	PITPNM3	protein_coding
ENSG00000091622	mature-tRNA-Glu-CTC_5_end_2	ENSG00000091622|ENST00000262483	159	-23.74	2	28	2413	2442	27	0.5926	0.7778	ENSG00000091622|ENST00000262483	mature-tRNA-Glu-CTC_5_end_2	0	44	49	44	49	341	6mer	x	6mer	0		0	PITPNM3	protein_coding
ENSG00000091622	mature-tRNA-Glu-CTC_5_end_3	ENSG00000091622|ENST00000262483	159	-24.13	2	28	2412	2442	27	0.5926	0.7778	ENSG00000091622|ENST00000262483	mature-tRNA-Glu-CTC_5_end_3	0	44	49	44	49	342	6mer	x	6mer	0		0	PITPNM3	protein_coding
ENSG00000134760	mature-tRNA-Glu-TTC_5_end_1	ENSG00000134760|ENST00000257192	179	-35.23	2	32	639	674	34	0.6765	0.7647	ENSG00000134760|ENST00000257192	mature-tRNA-Glu-TTC_5_end_1	0	30	36	30	36	413	7mer-m8	x	7mer-m8	0		0	DSG1	protein_coding
ENSG00000134760	mature-tRNA-Glu-TTC_5_end_2	ENSG00000134760|ENST00000257192	184	-36.26	2	33	638	674	35	0.6857	0.7714	ENSG00000134760|ENST00000257192	mature-tRNA-Glu-TTC_5_end_2	0	30	36	30	36	414	7mer-m8	x	7mer-m8	0		0	DSG1	protein_coding
ENSG00000110880	mature-tRNA-Gly-GCC_5_end_1	ENSG00000110880|ENST00000261401	158	-21.13	2	24	346	380	25	0.6	0.76	ENSG00000110880|ENST00000261401	mature-tRNA-Gly-GCC_5_end_1	0	32	37	32	37	441	6mer	x	6mer	0		0	CORO1C	protein_coding
ENSG00000110880	mature-tRNA-Gly-GCC_5_end_2	ENSG00000110880|ENST00000261401	158	-22.31	2	24	345	380	25	0.6	0.76	ENSG00000110880|ENST00000261401	mature-tRNA-Gly-GCC_5_end_2	0	32	37	32	37	442	6mer	x	6mer	0		0	CORO1C	protein_coding
ENSG00000110880	mature-tRNA-Gly-GCC_5_end_3	ENSG00000110880|ENST00000261401	158	-22.58	2	24	344	380	25	0.6	0.76	ENSG00000110880|ENST00000261401	mature-tRNA-Gly-GCC_5_end_3	0	32	37	32	37	443	6mer	x	6mer	0		0	CORO1C	protein_coding
ENSG00000136213	mature-tRNA-Glu-CTC_5_end_1	ENSG00000136213|ENST00000258711	166	-33.05	2	24	10626	10659	23	0.6522	0.8261	ENSG00000136213|ENST00000258711	mature-tRNA-Glu-CTC_5_end_1	0	41	46	41	46	447	6mer	x	6mer	0		0	CHST12	protein_coding
ENSG00000136213	mature-tRNA-Glu-CTC_5_end_2	ENSG00000136213|ENST00000258711	166	-32.88	2	24	10628	10659	23	0.6522	0.8261	ENSG00000136213|ENST00000258711	mature-tRNA-Glu-CTC_5_end_2	0	41	46	41	46	448	6mer	x	6mer	0		0	CHST12	protein_coding
ENSG00000136213	mature-tRNA-Glu-CTC_5_end_3	ENSG00000136213|ENST00000258711	166	-32.88	2	24	10627	10659	23	0.6522	0.8261	ENSG00000136213|ENST00000258711	mature-tRNA-Glu-CTC_5_end_3	0	41	46	41	46	449	6mer	x	6mer	0		0	CHST12	protein_coding
ENSG00000065717	mature-tRNA-Glu-TTC_5_end_1	ENSG00000065717|ENST00000262953	157	-29.02	2	24	127	158	22	0.6818	0.7273	ENSG00000065717|ENST00000262953	mature-tRNA-Glu-TTC_5_end_1	0	51	56	51	56	450	6mer	x	6mer	0		0	TLE2	protein_coding
ENSG00000065717	mature-tRNA-Glu-TTC_5_end_2	ENSG00000065717|ENST00000262953	157	-29.02	2	24	126	158	22	0.6818	0.7273	ENSG00000065717|ENST00000262953	mature-tRNA-Glu-TTC_5_end_2	0	51	56	51	56	451	6mer	x	6mer	0		0	TLE2	protein_coding
ENSG00000136848	mature-tRNA-Glu-CTC_5_end_1	ENSG00000136848|ENST00000259371	176	-43.8	2	21	605	637	19	0.7895	0.8947	ENSG00000136848|ENST00000259371	mature-tRNA-Glu-CTC_5_end_1	0	50	56	50	56	452	7mer-1a	x	7mer-1a	0		0	DAB2IP	protein_coding
ENSG00000136848	mature-tRNA-Glu-CTC_5_end_2	ENSG00000136848|ENST00000259371	172	-39.5	2	21	607	637	19	0.7368	0.8947	ENSG00000136848|ENST00000259371	mature-tRNA-Glu-CTC_5_end_2	0	50	56	50	56	453	7mer-1a	x	7mer-1a	0		0	DAB2IP	protein_coding
ENSG00000136848	mature-tRNA-Glu-CTC_5_end_3	ENSG00000136848|ENST00000259371	172	-41.58	2	21	606	637	19	0.7368	0.8947	ENSG00000136848|ENST00000259371	mature-tRNA-Glu-CTC_5_end_3	0	50	56	50	56	454	7mer-1a	x	7mer-1a	0		0	DAB2IP	protein_coding
ENSG00000161850	mature-tRNA-Glu-CTC_5_end_1	ENSG00000161850|ENST00000257974	161	-36.69	2	32	31	69	36	0.5556	0.6944	ENSG00000161850|ENST00000257974	mature-tRNA-Glu-CTC_5_end_1	0	44	49	44	49	471	6mer	x	6mer	0		0	KRT82	protein_coding
ENSG00000161850	mature-tRNA-Glu-CTC_5_end_2	ENSG00000161850|ENST00000257974	163	-31.45	2	30	43	69	28	0.6429	0.75	ENSG00000161850|ENST00000257974	mature-tRNA-Glu-CTC_5_end_2	0	44	49	44	49	472	6mer	x	6mer	0		0	KRT82	protein_coding
ENSG00000161850	mature-tRNA-Glu-CTC_5_end_3	ENSG00000161850|ENST00000257974	163	-32.41	2	30	42	69	28	0.6429	0.75	ENSG00000161850|ENST00000257974	mature-tRNA-Glu-CTC_5_end_3	0	44	49	44	49	473	6mer	x	6mer	0		0	KRT82	protein_coding
ENSG00000039139	mature-tRNA-Glu-TTC_5_end_1	ENSG00000039139|ENST00000265104	145	-20.33	2	10	1	9	8	1	1	ENSG00000039139|ENST00000265104	mature-tRNA-Glu-TTC_5_end_1	0	44	49	44	49	492	6mer	x	6mer	0		0	DNAH5	protein_coding
ENSG00000039139	mature-tRNA-Glu-TTC_5_end_2	ENSG00000039139|ENST00000265104	145	-20.5	2	10	1	9	8	1	1	ENSG00000039139|ENST00000265104	mature-tRNA-Glu-TTC_5_end_2	0	44	49	44	49	493	6mer	x	6mer	0		0	DNAH5	protein_coding
ENSG00000101577	mature-tRNA-Glu-CTC_5_end_1	ENSG00000101577|ENST00000261596	168	-31.8	2	32	1193	1223	30	0.6	0.7333	ENSG00000101577|ENST00000261596	mature-tRNA-Glu-CTC_5_end_1	0	25	32	25	32	513	8mer-1a	x	8mer-1a	0		0	LPIN2	protein_coding
ENSG00000101577	mature-tRNA-Glu-CTC_5_end_2	ENSG00000101577|ENST00000261596	162	-30.68	2	30	1195	1223	28	0.5714	0.75	ENSG00000101577|ENST00000261596	mature-tRNA-Glu-CTC_5_end_2	0	25	32	25	32	514	8mer-1a	x	8mer-1a	0		0	LPIN2	protein_coding
ENSG00000101577	mature-tRNA-Glu-CTC_5_end_3	ENSG00000101577|ENST00000261596	163	-31.8	2	31	1188	1223	33	0.6061	0.7273	ENSG00000101577|ENST00000261596	mature-tRNA-Glu-CTC_5_end_3	0	25	32	25	32	515	8mer-1a	x	8mer-1a	0		0	LPIN2	protein_coding
ENSG00000165392	mature-tRNA-Glu-CTC_5_end_1	ENSG00000165392|ENST00000298139	157	-24.19	2	18	467	496	16	0.6875	0.875	ENSG00000165392|ENST00000298139	mature-tRNA-Glu-CTC_5_end_1	0	39	45	39	45	616	7mer-1a	x	7mer-1a	0		0	WRN	protein_coding
ENSG00000165392	mature-tRNA-Glu-CTC_5_end_2	ENSG00000165392|ENST00000298139	157	-29.25	2	18	466	496	16	0.6875	0.875	ENSG00000165392|ENST00000298139	mature-tRNA-Glu-CTC_5_end_2	0	39	45	39	45	617	7mer-1a	x	7mer-1a	0		0	WRN	protein_coding
ENSG00000165392	mature-tRNA-Glu-CTC_5_end_3	ENSG00000165392|ENST00000298139	157	-29.52	2	18	465	496	16	0.6875	0.875	ENSG00000165392|ENST00000298139	mature-tRNA-Glu-CTC_5_end_3	0	39	45	39	45	618	7mer-1a	x	7mer-1a	0		0	WRN	protein_coding
ENSG00000166068	mature-tRNA-Glu-CTC_5_end_1	ENSG00000166068|ENST00000299084	158	-30.55	2	22	2933	2960	20	0.7	0.8	ENSG00000166068|ENST00000299084	mature-tRNA-Glu-CTC_5_end_1	0	49	54	49	54	636	6mer	x	6mer	0		0	SPRED1	protein_coding
ENSG00000166068	mature-tRNA-Glu-CTC_5_end_2	ENSG00000166068|ENST00000299084	158	-30.69	2	22	2932	2960	20	0.7	0.8	ENSG00000166068|ENST00000299084	mature-tRNA-Glu-CTC_5_end_2	0	49	54	49	54	637	6mer	x	6mer	0		0	SPRED1	protein_coding
ENSG00000166068	mature-tRNA-Glu-CTC_5_end_3	ENSG00000166068|ENST00000299084	158	-30.93	2	22	2931	2960	20	0.7	0.8	ENSG00000166068|ENST00000299084	mature-tRNA-Glu-CTC_5_end_3	0	49	54	49	54	638	6mer	x	6mer	0		0	SPRED1	protein_coding
ENSG00000183826	mature-tRNA-Glu-TTC_5_end_1	ENSG00000183826|ENST00000314100	153	-25.76	2	32	3480	3511	30	0.5	0.7	ENSG00000183826|ENST00000314100	mature-tRNA-Glu-TTC_5_end_1	0	32	37	32	37	689	6mer	x	6mer	0		0	BTBD9	protein_coding
ENSG00000183826	mature-tRNA-Glu-TTC_5_end_2	ENSG00000183826|ENST00000314100	154	-25.93	2	33	3479	3511	31	0.4839	0.7097	ENSG00000183826|ENST00000314100	mature-tRNA-Glu-TTC_5_end_2	0	32	37	32	37	690	6mer	x	6mer	0		0	BTBD9	protein_coding
ENSG00000186453	mature-tRNA-Glu-TTC_5_end_1	ENSG00000186453|ENST00000295150	161	-23.71	2	30	155	187	28	0.5714	0.6786	ENSG00000186453|ENST00000295150	mature-tRNA-Glu-TTC_5_end_1	0	34	39	34	39	694	6mer	x	6mer	0		0	FAM228A	protein_coding
ENSG00000186453	mature-tRNA-Glu-TTC_5_end_2	ENSG00000186453|ENST00000295150	161	-23.88	2	30	154	187	28	0.5714	0.6786	ENSG00000186453|ENST00000295150	mature-tRNA-Glu-TTC_5_end_2	0	34	39	34	39	695	6mer	x	6mer	0		0	FAM228A	protein_coding
ENSG00000157600	mature-tRNA-Glu-TTC_5_end_1	ENSG00000157600|ENST00000288381	166	-29.31	2	32	2742	2771	30	0.6333	0.7333	ENSG00000157600|ENST00000288381	mature-tRNA-Glu-TTC_5_end_1	0	38	44	38	44	758	7mer-m8	x	7mer-m8	0		0	TMEM164	protein_coding
ENSG00000157600	mature-tRNA-Glu-TTC_5_end_2	ENSG00000157600|ENST00000288381	166	-29.31	2	32	2741	2771	30	0.6333	0.7333	ENSG00000157600|ENST00000288381	mature-tRNA-Glu-TTC_5_end_2	0	38	44	38	44	759	7mer-m8	x	7mer-m8	0		0	TMEM164	protein_coding
ENSG00000184154	mature-tRNA-Glu-CTC_5_end_1	ENSG00000184154|ENST00000289488	167	-31.27	2	25	1181	1213	26	0.6538	0.7692	ENSG00000184154|ENST00000289488	mature-tRNA-Glu-CTC_5_end_1	0	46	51	46	51	779	6mer	x	6mer	0		0	LRTOMT	protein_coding
ENSG00000184154	mature-tRNA-Glu-CTC_5_end_2	ENSG00000184154|ENST00000289488	172	-31.27	2	30	1186	1213	28	0.6786	0.7857	ENSG00000184154|ENST00000289488	mature-tRNA-Glu-CTC_5_end_2	0	46	51	46	51	780	6mer	x	6mer	0		0	LRTOMT	protein_coding
ENSG00000184154	mature-tRNA-Glu-CTC_5_end_3	ENSG00000184154|ENST00000289488	172	-31.27	2	30	1185	1213	28	0.6786	0.7857	ENSG00000184154|ENST00000289488	mature-tRNA-Glu-CTC_5_end_3	0	46	51	46	51	781	6mer	x	6mer	0		0	LRTOMT	protein_coding
ENSG00000161940	mature-tRNA-Glu-CTC_5_end_1	ENSG00000161940|ENST00000293805	176	-37.45	2	32	946	985	37	0.6486	0.7297	ENSG00000161940|ENST00000293805	mature-tRNA-Glu-CTC_5_end_1	0	23	28	23	28	810	6mer	x	6mer	0		0	BCL6B	protein_coding
ENSG00000161940	mature-tRNA-Glu-CTC_5_end_2	ENSG00000161940|ENST00000293805	166	-36.81	2	30	948	985	35	0.6286	0.7143	ENSG00000161940|ENST00000293805	mature-tRNA-Glu-CTC_5_end_2	0	23	28	23	28	811	6mer	x	6mer	0		0	BCL6B	protein_coding
ENSG00000161940	mature-tRNA-Glu-CTC_5_end_3	ENSG00000161940|ENST00000293805	171	-37.2	2	31	947	985	36	0.6389	0.7222	ENSG00000161940|ENST00000293805	mature-tRNA-Glu-CTC_5_end_3	0	23	28	23	28	812	6mer	x	6mer	0		0	BCL6B	protein_coding
ENSG00000164548	mature-tRNA-Glu-TTC_5_end_1	ENSG00000164548|ENST00000297071	170	-27.17	2	31	713	742	29	0.6552	0.7241	ENSG00000164548|ENST00000297071	mature-tRNA-Glu-TTC_5_end_1	0	24	29	24	29	846	6mer	x	6mer	0		0	TRA2A	protein_coding
ENSG00000164548	mature-tRNA-Glu-TTC_5_end_2	ENSG00000164548|ENST00000297071	170	-27.72	2	31	712	742	29	0.6552	0.7241	ENSG00000164548|ENST00000297071	mature-tRNA-Glu-TTC_5_end_2	0	24	29	24	29	847	6mer	x	6mer	0		0	TRA2A	protein_coding
ENSG00000174903	mature-tRNA-Glu-CTC_5_end_1	ENSG00000174903|ENST00000311481	173	-34.8	2	30	837	869	30	0.6667	0.7667	ENSG00000174903|ENST00000311481	mature-tRNA-Glu-CTC_5_end_1	0	43	48	43	48	862	6mer	x	6mer	0		0	RAB1B	protein_coding
ENSG00000174903	mature-tRNA-Glu-CTC_5_end_2	ENSG00000174903|ENST00000311481	173	-34.69	2	30	839	869	30	0.6667	0.7667	ENSG00000174903|ENST00000311481	mature-tRNA-Glu-CTC_5_end_2	0	43	48	43	48	863	6mer	x	6mer	0		0	RAB1B	protein_coding
ENSG00000174903	mature-tRNA-Glu-CTC_5_end_3	ENSG00000174903|ENST00000311481	173	-34.96	2	30	838	869	30	0.6667	0.7667	ENSG00000174903|ENST00000311481	mature-tRNA-Glu-CTC_5_end_3	0	43	48	43	48	864	6mer	x	6mer	0		0	RAB1B	protein_coding
ENSG00000196616	mature-tRNA-Glu-TTC_5_end_1	ENSG00000196616|ENST00000305046	148	-31.31	2	32	2123	2158	33	0.5455	0.6667	ENSG00000196616|ENST00000305046	mature-tRNA-Glu-TTC_5_end_1	0	45	50	45	50	898	6mer	x	6mer	0		0	ADH1B	protein_coding
ENSG00000196616	mature-tRNA-Glu-TTC_5_end_2	ENSG00000196616|ENST00000305046	149	-31.48	2	33	2122	2158	34	0.5294	0.6765	ENSG00000196616|ENST00000305046	mature-tRNA-Glu-TTC_5_end_2	0	45	50	45	50	899	6mer	x	6mer	0		0	ADH1B	protein_coding
ENSG00000166086	mature-tRNA-Glu-CTC_5_end_1	ENSG00000166086|ENST00000299106	169	-31.74	2	27	2654	2686	28	0.6786	0.7143	ENSG00000166086|ENST00000299106	mature-tRNA-Glu-CTC_5_end_1	0	49	55	49	55	943	7mer-m8	x	7mer-m8	0		0	JAM3	protein_coding
ENSG00000166086	mature-tRNA-Glu-CTC_5_end_2	ENSG00000166086|ENST00000299106	169	-33.49	2	27	2653	2686	28	0.6786	0.7143	ENSG00000166086|ENST00000299106	mature-tRNA-Glu-CTC_5_end_2	0	49	55	49	55	944	7mer-m8	x	7mer-m8	0		0	JAM3	protein_coding
ENSG00000166086	mature-tRNA-Glu-CTC_5_end_3	ENSG00000166086|ENST00000299106	169	-33.73	2	27	2652	2686	28	0.6786	0.7143	ENSG00000166086|ENST00000299106	mature-tRNA-Glu-CTC_5_end_3	0	49	55	49	55	945	7mer-m8	x	7mer-m8	0		0	JAM3	protein_coding
ENSG00000173838	mature-tRNA-Asp-GTC_CCA_end_1	ENSG00000173838|ENST00000311269	156	-39.39	2	37	6	42	36	0.5556	0.6389	ENSG00000173838|ENST00000311269	mature-tRNA-Asp-GTC_CCA_end_1	0	15	20	15	20	1011	6mer	x	6mer	0		0	MARCHF10	protein_coding
ENSG00000152133	mature-tRNA-Glu-CTC_5_end_1	ENSG00000152133|ENST00000281932	159	-30.37	2	25	488	518	24	0.625	0.75	ENSG00000152133|ENST00000281932	mature-tRNA-Glu-CTC_5_end_1	0	23	28	23	28	1019	6mer	x	6mer	0		0	GPATCH11	protein_coding
ENSG00000152133	mature-tRNA-Glu-CTC_5_end_2	ENSG00000152133|ENST00000281932	159	-30.54	2	25	487	518	24	0.625	0.75	ENSG00000152133|ENST00000281932	mature-tRNA-Glu-CTC_5_end_2	0	23	28	23	28	1020	6mer	x	6mer	0		0	GPATCH11	protein_coding
ENSG00000152133	mature-tRNA-Glu-CTC_5_end_3	ENSG00000152133|ENST00000281932	159	-30.54	2	25	486	518	24	0.625	0.75	ENSG00000152133|ENST00000281932	mature-tRNA-Glu-CTC_5_end_3	0	23	28	23	28	1021	6mer	x	6mer	0		0	GPATCH11	protein_coding
ENSG00000164366	mature-tRNA-Glu-TTC_5_end_1	ENSG00000164366|ENST00000296824	150	-30.52	2	32	7068	7106	36	0.5556	0.7222	ENSG00000164366|ENST00000296824	mature-tRNA-Glu-TTC_5_end_1	0	26	31	26	31	1030	6mer	x	6mer	0		0	CCDC127	protein_coding
ENSG00000164366	mature-tRNA-Glu-TTC_5_end_2	ENSG00000164366|ENST00000296824	150	-30.52	2	32	7067	7106	36	0.5556	0.7222	ENSG00000164366|ENST00000296824	mature-tRNA-Glu-TTC_5_end_2	0	26	31	26	31	1031	6mer	x	6mer	0		0	CCDC127	protein_coding
ENSG00000071794	mature-tRNA-Glu-TTC_5_end_1	ENSG00000071794|ENST00000310053	171	-29.97	2	31	1500	1532	30	0.6333	0.7667	ENSG00000071794|ENST00000310053	mature-tRNA-Glu-TTC_5_end_1	0	15	20	15	20	1047	6mer	x	6mer	0		0	HLTF	protein_coding
ENSG00000071794	mature-tRNA-Glu-TTC_5_end_2	ENSG00000071794|ENST00000310053	171	-29.97	2	31	1499	1532	30	0.6333	0.7667	ENSG00000071794|ENST00000310053	mature-tRNA-Glu-TTC_5_end_2	0	15	20	15	20	1048	6mer	x	6mer	0		0	HLTF	protein_coding
ENSG00000270149	mature-tRNA-Glu-TTC_5_end_1	ENSG00000270149|ENST00000289779	152	-27.42	2	28	718	752	29	0.5862	0.6897	ENSG00000270149|ENST00000289779	mature-tRNA-Glu-TTC_5_end_1	0	23	29	23	29	1072	7mer-m8	x	7mer-m8	0		0	AL591806.2	protein_coding
ENSG00000270149	mature-tRNA-Glu-TTC_5_end_2	ENSG00000270149|ENST00000289779	152	-29.44	2	28	717	752	29	0.5862	0.6897	ENSG00000270149|ENST00000289779	mature-tRNA-Glu-TTC_5_end_2	0	23	29	23	29	1073	7mer-m8	x	7mer-m8	0		0	AL591806.2	protein_coding
ENSG00000138642	mature-tRNA-Glu-CTC_5_end_1	ENSG00000138642|ENST00000273960	159	-25.51	2	24	2190	2219	22	0.5909	0.7727	ENSG00000138642|ENST00000273960	mature-tRNA-Glu-CTC_5_end_1	0	33	38	33	38	1148	6mer	x	6mer	0		0	HERC6	protein_coding
ENSG00000138642	mature-tRNA-Glu-CTC_5_end_2	ENSG00000138642|ENST00000273960	159	-25.68	2	24	2189	2219	22	0.5909	0.7727	ENSG00000138642|ENST00000273960	mature-tRNA-Glu-CTC_5_end_2	0	33	38	33	38	1149	6mer	x	6mer	0		0	HERC6	protein_coding
ENSG00000138642	mature-tRNA-Glu-CTC_5_end_3	ENSG00000138642|ENST00000273960	159	-25.7	2	24	2188	2219	22	0.5909	0.7727	ENSG00000138642|ENST00000273960	mature-tRNA-Glu-CTC_5_end_3	0	33	38	33	38	1150	6mer	x	6mer	0		0	HERC6	protein_coding
ENSG00000179673	mature-tRNA-Glu-TTC_5_end_1	ENSG00000179673|ENST00000322329	155	-27.39	2	31	197	227	29	0.5517	0.6897	ENSG00000179673|ENST00000322329	mature-tRNA-Glu-TTC_5_end_1	0	43	48	43	48	1210	6mer	x	6mer	0		0	RPRML	protein_coding
ENSG00000179673	mature-tRNA-Glu-TTC_5_end_2	ENSG00000179673|ENST00000322329	155	-29.41	2	31	196	227	29	0.5517	0.6897	ENSG00000179673|ENST00000322329	mature-tRNA-Glu-TTC_5_end_2	0	43	48	43	48	1211	6mer	x	6mer	0		0	RPRML	protein_coding
ENSG00000106785	mature-tRNA-Glu-CTC_5_end_1	ENSG00000106785|ENST00000341469	169	-26.02	2	27	2477	2507	26	0.6154	0.8077	ENSG00000106785|ENST00000341469	mature-tRNA-Glu-CTC_5_end_1	0	26	32	26	32	1218	7mer-m8	x	7mer-m8	0		0	TRIM14	protein_coding
ENSG00000106785	mature-tRNA-Glu-CTC_5_end_2	ENSG00000106785|ENST00000341469	169	-26.02	2	27	2476	2507	26	0.6154	0.8077	ENSG00000106785|ENST00000341469	mature-tRNA-Glu-CTC_5_end_2	0	26	32	26	32	1219	7mer-m8	x	7mer-m8	0		0	TRIM14	protein_coding
ENSG00000106785	mature-tRNA-Glu-CTC_5_end_3	ENSG00000106785|ENST00000341469	169	-27.15	2	27	2475	2507	26	0.6154	0.8077	ENSG00000106785|ENST00000341469	mature-tRNA-Glu-CTC_5_end_3	0	26	32	26	32	1220	7mer-m8	x	7mer-m8	0		0	TRIM14	protein_coding
ENSG00000036257	mature-tRNA-Glu-TTC_5_end_1	ENSG00000036257|ENST00000344951	148	-21.26	2	28	4039	4071	27	0.5926	0.6667	ENSG00000036257|ENST00000344951	mature-tRNA-Glu-TTC_5_end_1	0	27	32	27	32	1227	6mer	x	6mer	0		0	CUL3	protein_coding
ENSG00000036257	mature-tRNA-Glu-TTC_5_end_2	ENSG00000036257|ENST00000344951	148	-21.39	2	28	4038	4071	27	0.5926	0.6667	ENSG00000036257|ENST00000344951	mature-tRNA-Glu-TTC_5_end_2	0	27	32	27	32	1228	6mer	x	6mer	0		0	CUL3	protein_coding
ENSG00000166037	mature-tRNA-Glu-CTC_5_end_1	ENSG00000166037|ENST00000325542	151	-26.84	2	27	164	198	30	0.6	0.7	ENSG00000166037|ENST00000325542	mature-tRNA-Glu-CTC_5_end_1	0	36	42	36	42	1264	7mer-m8	x	7mer-m8	0		0	CEP57	protein_coding
ENSG00000166037	mature-tRNA-Glu-CTC_5_end_2	ENSG00000166037|ENST00000325542	154	-26.84	2	30	163	198	33	0.5758	0.697	ENSG00000166037|ENST00000325542	mature-tRNA-Glu-CTC_5_end_2	0	36	42	36	42	1265	7mer-m8	x	7mer-m8	0		0	CEP57	protein_coding
ENSG00000166037	mature-tRNA-Glu-CTC_5_end_3	ENSG00000166037|ENST00000325542	154	-26.84	2	30	162	198	33	0.5758	0.697	ENSG00000166037|ENST00000325542	mature-tRNA-Glu-CTC_5_end_3	0	36	42	36	42	1266	7mer-m8	x	7mer-m8	0		0	CEP57	protein_coding
ENSG00000116237	mature-tRNA-Glu-CTC_5_end_1	ENSG00000116237|ENST00000343813	154	-32.18	2	31	2477	2512	33	0.5758	0.697	ENSG00000116237|ENST00000343813	mature-tRNA-Glu-CTC_5_end_1	0	33	39	33	39	1293	7mer-m8	x	7mer-m8	0		0	ICMT	protein_coding
ENSG00000116237	mature-tRNA-Glu-CTC_5_end_2	ENSG00000116237|ENST00000343813	151	-28.68	2	27	2487	2512	25	0.64	0.72	ENSG00000116237|ENST00000343813	mature-tRNA-Glu-CTC_5_end_2	0	33	39	33	39	1294	7mer-m8	x	7mer-m8	0		0	ICMT	protein_coding
ENSG00000116237	mature-tRNA-Glu-CTC_5_end_3	ENSG00000116237|ENST00000343813	151	-30.05	2	27	2486	2512	25	0.64	0.72	ENSG00000116237|ENST00000343813	mature-tRNA-Glu-CTC_5_end_3	0	33	39	33	39	1295	7mer-m8	x	7mer-m8	0		0	ICMT	protein_coding
ENSG00000151650	mature-tRNA-Asp-GTC_CCA_end_1	ENSG00000151650|ENST00000325980	152	-49.57	2	30	1116	1158	33	0.5758	0.6061	ENSG00000151650|ENST00000325980	mature-tRNA-Asp-GTC_CCA_end_1	0	42	47	42	47	1389	6mer	x	6mer	0		0	VENTX	protein_coding
ENSG00000150510	mature-tRNA-Gly-GCC_5_end_1	ENSG00000150510|ENST00000322475	154	-20.6	2	28	2250	2284	29	0.5517	0.6897	ENSG00000150510|ENST00000322475	mature-tRNA-Gly-GCC_5_end_1	0	18	24	18	24	1395	7mer-1a	x	7mer-1a	0		0	FAM124A	protein_coding
ENSG00000150510	mature-tRNA-Gly-GCC_5_end_2	ENSG00000150510|ENST00000322475	154	-22.26	2	28	2249	2284	29	0.5517	0.6897	ENSG00000150510|ENST00000322475	mature-tRNA-Gly-GCC_5_end_2	0	18	24	18	24	1396	7mer-1a	x	7mer-1a	0		0	FAM124A	protein_coding
ENSG00000150510	mature-tRNA-Gly-GCC_5_end_3	ENSG00000150510|ENST00000322475	154	-22.53	2	28	2248	2284	29	0.5517	0.6897	ENSG00000150510|ENST00000322475	mature-tRNA-Gly-GCC_5_end_3	0	18	24	18	24	1397	7mer-1a	x	7mer-1a	0		0	FAM124A	protein_coding
ENSG00000179021	mature-tRNA-Glu-TTC_5_end_1	ENSG00000179021|ENST00000318887	159	-26.09	2	25	333	369	27	0.6296	0.7037	ENSG00000179021|ENST00000318887	mature-tRNA-Glu-TTC_5_end_1	0	37	42	37	42	1447	6mer	x	6mer	0		0	C3orf38	protein_coding
ENSG00000179021	mature-tRNA-Glu-TTC_5_end_2	ENSG00000179021|ENST00000318887	159	-27.04	2	25	332	369	27	0.6296	0.7037	ENSG00000179021|ENST00000318887	mature-tRNA-Glu-TTC_5_end_2	0	37	42	37	42	1448	6mer	x	6mer	0		0	C3orf38	protein_coding
ENSG00000144115	mature-tRNA-Glu-CTC_5_end_1	ENSG00000144115|ENST00000343544	163	-35.29	2	32	406	438	30	0.5333	0.7	ENSG00000144115|ENST00000343544	mature-tRNA-Glu-CTC_5_end_1	0	17	24	17	24	1475	8mer-1a	x	8mer-1a	0		0	THNSL2	protein_coding
ENSG00000144115	mature-tRNA-Glu-CTC_5_end_2	ENSG00000144115|ENST00000343544	159	-39.77	2	30	401	438	35	0.5429	0.7143	ENSG00000144115|ENST00000343544	mature-tRNA-Glu-CTC_5_end_2	0	17	24	17	24	1476	8mer-1a	x	8mer-1a	0		0	THNSL2	protein_coding
ENSG00000144115	mature-tRNA-Glu-CTC_5_end_3	ENSG00000144115|ENST00000343544	161	-33.99	2	31	410	438	29	0.5862	0.7586	ENSG00000144115|ENST00000343544	mature-tRNA-Glu-CTC_5_end_3	0	17	24	17	24	1477	8mer-1a	x	8mer-1a	0		0	THNSL2	protein_coding
ENSG00000115325	mature-tRNA-Glu-CTC_5_end_1	ENSG00000115325|ENST00000340004	153	-28.16	2	28	820	851	26	0.5385	0.7308	ENSG00000115325|ENST00000340004	mature-tRNA-Glu-CTC_5_end_1	0	17	24	17	24	1478	8mer-1a	x	8mer-1a	0		0	DOK1	protein_coding
ENSG00000115325	mature-tRNA-Glu-CTC_5_end_2	ENSG00000115325|ENST00000340004	149	-26.5	2	28	822	851	26	0.5	0.7308	ENSG00000115325|ENST00000340004	mature-tRNA-Glu-CTC_5_end_2	0	17	24	17	24	1479	8mer-1a	x	8mer-1a	0		0	DOK1	protein_coding
ENSG00000115325	mature-tRNA-Glu-CTC_5_end_3	ENSG00000115325|ENST00000340004	149	-26.74	2	28	821	851	26	0.5	0.7308	ENSG00000115325|ENST00000340004	mature-tRNA-Glu-CTC_5_end_3	0	17	24	17	24	1480	8mer-1a	x	8mer-1a	0		0	DOK1	protein_coding
ENSG00000065029	mature-tRNA-Glu-CTC_5_end_1	ENSG00000065029|ENST00000339411	182	-40.68	2	31	451	484	31	0.6774	0.8387	ENSG00000065029|ENST00000339411	mature-tRNA-Glu-CTC_5_end_1	0	21	26	21	26	1488	6mer	x	6mer	0		0	ZNF76	protein_coding
ENSG00000065029	mature-tRNA-Glu-CTC_5_end_2	ENSG00000065029|ENST00000339411	185	-45.21	2	30	453	484	30	0.7	0.8667	ENSG00000065029|ENST00000339411	mature-tRNA-Glu-CTC_5_end_2	0	21	26	21	26	1489	6mer	x	6mer	0		0	ZNF76	protein_coding
ENSG00000065029	mature-tRNA-Glu-CTC_5_end_3	ENSG00000065029|ENST00000339411	190	-45.21	2	31	452	484	31	0.7097	0.871	ENSG00000065029|ENST00000339411	mature-tRNA-Glu-CTC_5_end_3	0	21	26	21	26	1490	6mer	x	6mer	0		0	ZNF76	protein_coding
ENSG00000185436	mature-tRNA-Gly-GCC_5_end_1	ENSG00000185436|ENST00000327535	159	-24.23	2	24	1167	1198	22	0.6364	0.7273	ENSG00000185436|ENST00000327535	mature-tRNA-Gly-GCC_5_end_1	0	30	36	30	36	1529	7mer-m8	x	7mer-m8	0		0	IFNLR1	protein_coding
ENSG00000185436	mature-tRNA-Gly-GCC_5_end_2	ENSG00000185436|ENST00000327535	159	-24.23	2	24	1166	1198	22	0.6364	0.7273	ENSG00000185436|ENST00000327535	mature-tRNA-Gly-GCC_5_end_2	0	30	36	30	36	1530	7mer-m8	x	7mer-m8	0		0	IFNLR1	protein_coding
ENSG00000185436	mature-tRNA-Gly-GCC_5_end_3	ENSG00000185436|ENST00000327535	159	-24.23	2	24	1165	1198	22	0.6364	0.7273	ENSG00000185436|ENST00000327535	mature-tRNA-Gly-GCC_5_end_3	0	30	36	30	36	1531	7mer-m8	x	7mer-m8	0		0	IFNLR1	protein_coding
ENSG00000178568	mature-tRNA-Glu-CTC_5_end_1	ENSG00000178568|ENST00000342788	172	-37.93	2	32	6724	6756	31	0.6129	0.7742	ENSG00000178568|ENST00000342788	mature-tRNA-Glu-CTC_5_end_1	0	55	60	55	60	1556	6mer	x	6mer	0		0	ERBB4	protein_coding
ENSG00000178568	mature-tRNA-Glu-CTC_5_end_2	ENSG00000178568|ENST00000342788	168	-36.82	2	25	6726	6756	23	0.6522	0.7826	ENSG00000178568|ENST00000342788	mature-tRNA-Glu-CTC_5_end_2	0	55	60	55	60	1557	6mer	x	6mer	0		0	ERBB4	protein_coding
ENSG00000178568	mature-tRNA-Glu-CTC_5_end_3	ENSG00000178568|ENST00000342788	170	-38.81	2	31	6725	6756	29	0.5862	0.7241	ENSG00000178568|ENST00000342788	mature-tRNA-Glu-CTC_5_end_3	0	55	60	55	60	1558	6mer	x	6mer	0		0	ERBB4	protein_coding
ENSG00000165633	mature-tRNA-Val-AAC_5_end_1	ENSG00000165633|ENST00000332853	159	-20.24	2	16	2010	2027	14	0.8571	0.8571	ENSG00000165633|ENST00000332853	mature-tRNA-Val-AAC_5_end_1	0	37	43	37	43	1606	7mer-m8	x	7mer-m8	0		0	VSTM4	protein_coding
ENSG00000165633	mature-tRNA-Val-CAC_5_end_1	ENSG00000165633|ENST00000332853	168	-26.41	2	21	1995	2027	19	0.7368	0.8421	ENSG00000165633|ENST00000332853	mature-tRNA-Val-CAC_5_end_1	0	37	43	37	43	1607	7mer-m8	x	7mer-m8	0		0	VSTM4	protein_coding
ENSG00000189269	mature-tRNA-Glu-CTC_5_end_1	ENSG00000189269|ENST00000317749	153	-26.21	2	27	1	26	27	0.6296	0.7407	ENSG00000189269|ENST00000317749	mature-tRNA-Glu-CTC_5_end_1	0	37	42	37	42	1651	6mer	x	6mer	0		0	DRICH1	protein_coding
ENSG00000189269	mature-tRNA-Glu-CTC_5_end_2	ENSG00000189269|ENST00000317749	150	-24.34	2	27	1	26	27	0.5926	0.7037	ENSG00000189269|ENST00000317749	mature-tRNA-Glu-CTC_5_end_2	0	37	42	37	42	1652	6mer	x	6mer	0		0	DRICH1	protein_coding
ENSG00000189269	mature-tRNA-Glu-CTC_5_end_3	ENSG00000189269|ENST00000317749	150	-24.34	2	27	1	26	27	0.5926	0.7037	ENSG00000189269|ENST00000317749	mature-tRNA-Glu-CTC_5_end_3	0	37	42	37	42	1653	6mer	x	6mer	0		0	DRICH1	protein_coding
ENSG00000100023	mature-tRNA-Glu-CTC_5_end_1	ENSG00000100023|ENST00000335025	171	-30.81	2	31	2264	2296	30	0.6667	0.7333	ENSG00000100023|ENST00000335025	mature-tRNA-Glu-CTC_5_end_1	0	32	37	32	37	1656	6mer	x	6mer	0		0	PPIL2	protein_coding
ENSG00000100023	mature-tRNA-Glu-CTC_5_end_2	ENSG00000100023|ENST00000335025	168	-30.6	2	29	2266	2296	27	0.5926	0.7407	ENSG00000100023|ENST00000335025	mature-tRNA-Glu-CTC_5_end_2	0	32	37	32	37	1657	6mer	x	6mer	0		0	PPIL2	protein_coding
ENSG00000100023	mature-tRNA-Glu-CTC_5_end_3	ENSG00000100023|ENST00000335025	170	-30.84	2	31	2265	2296	29	0.5862	0.7241	ENSG00000100023|ENST00000335025	mature-tRNA-Glu-CTC_5_end_3	0	32	37	32	37	1658	6mer	x	6mer	0		0	PPIL2	protein_coding
ENSG00000260238	mature-tRNA-Glu-TTC_5_end_1	ENSG00000260238|ENST00000320139	163	-30.43	2	32	160	190	30	0.6333	0.7	ENSG00000260238|ENST00000320139	mature-tRNA-Glu-TTC_5_end_1	0	24	29	24	29	1668	6mer	x	6mer	0		0	PMF1-BGLAP	protein_coding
ENSG00000260238	mature-tRNA-Glu-TTC_5_end_2	ENSG00000260238|ENST00000320139	163	-30.43	2	32	159	190	30	0.6333	0.7	ENSG00000260238|ENST00000320139	mature-tRNA-Glu-TTC_5_end_2	0	24	29	24	29	1669	6mer	x	6mer	0		0	PMF1-BGLAP	protein_coding
ENSG00000189079	mature-tRNA-Gly-GCC_5_end_1	ENSG00000189079|ENST00000334344	164	-19.04	2	26	1895	1927	27	0.5926	0.7778	ENSG00000189079|ENST00000334344	mature-tRNA-Gly-GCC_5_end_1	0	37	44	37	44	1672	8mer-1a	x	8mer-1a	0		0	ARID2	protein_coding
ENSG00000189079	mature-tRNA-Gly-GCC_5_end_2	ENSG00000189079|ENST00000334344	164	-19.04	2	26	1892	1927	27	0.5926	0.7778	ENSG00000189079|ENST00000334344	mature-tRNA-Gly-GCC_5_end_2	0	37	44	37	44	1673	8mer-1a	x	8mer-1a	0		0	ARID2	protein_coding
ENSG00000189079	mature-tRNA-Gly-GCC_5_end_3	ENSG00000189079|ENST00000334344	164	-19.04	2	26	1891	1927	27	0.5926	0.7778	ENSG00000189079|ENST00000334344	mature-tRNA-Gly-GCC_5_end_3	0	37	44	37	44	1674	8mer-1a	x	8mer-1a	0		0	ARID2	protein_coding
ENSG00000182318	mature-tRNA-Glu-CTC_5_end_1	ENSG00000182318|ENST00000329665	153	-29.93	2	30	2531	2571	36	0.6111	0.6667	ENSG00000182318|ENST00000329665	mature-tRNA-Glu-CTC_5_end_1	0	53	58	53	58	1718	6mer	x	6mer	0		0	ZSCAN22	protein_coding
ENSG00000182318	mature-tRNA-Glu-CTC_5_end_2	ENSG00000182318|ENST00000329665	153	-26.43	2	30	2541	2571	28	0.5357	0.6429	ENSG00000182318|ENST00000329665	mature-tRNA-Glu-CTC_5_end_2	0	53	58	53	58	1720	6mer	x	6mer	0		0	ZSCAN22	protein_coding
ENSG00000182318	mature-tRNA-Glu-CTC_5_end_3	ENSG00000182318|ENST00000329665	153	-26.43	2	30	2540	2571	28	0.5357	0.6429	ENSG00000182318|ENST00000329665	mature-tRNA-Glu-CTC_5_end_3	0	53	58	53	58	1722	6mer	x	6mer	0		0	ZSCAN22	protein_coding
ENSG00000165175	mature-tRNA-Glu-CTC_5_end_1	ENSG00000165175|ENST00000336949	147	-31.04	2	28	323	355	28	0.5357	0.7143	ENSG00000165175|ENST00000336949	mature-tRNA-Glu-CTC_5_end_1	0	48	54	48	54	1734	7mer-m8	x	7mer-m8	0		0	MID1IP1	protein_coding
ENSG00000165175	mature-tRNA-Glu-CTC_5_end_2	ENSG00000165175|ENST00000336949	147	-28.12	2	28	325	355	28	0.5357	0.7143	ENSG00000165175|ENST00000336949	mature-tRNA-Glu-CTC_5_end_2	0	48	54	48	54	1735	7mer-m8	x	7mer-m8	0		0	MID1IP1	protein_coding
ENSG00000165175	mature-tRNA-Glu-CTC_5_end_3	ENSG00000165175|ENST00000336949	147	-30.1	2	28	324	355	28	0.5357	0.7143	ENSG00000165175|ENST00000336949	mature-tRNA-Glu-CTC_5_end_3	0	48	54	48	54	1736	7mer-m8	x	7mer-m8	0		0	MID1IP1	protein_coding
ENSG00000142961	mature-tRNA-Glu-TTC_5_end_1	ENSG00000142961|ENST00000319928	157	-28.83	2	28	295	330	29	0.5862	0.7241	ENSG00000142961|ENST00000319928	mature-tRNA-Glu-TTC_5_end_1	0	24	29	24	29	1746	6mer	x	6mer	0		0	MOB3C	protein_coding
ENSG00000142961	mature-tRNA-Glu-TTC_5_end_2	ENSG00000142961|ENST00000319928	157	-28.83	2	28	294	330	29	0.5862	0.7241	ENSG00000142961|ENST00000319928	mature-tRNA-Glu-TTC_5_end_2	0	24	29	24	29	1747	6mer	x	6mer	0		0	MOB3C	protein_coding
ENSG00000170633	mature-tRNA-Glu-TTC_5_end_1	ENSG00000170633|ENST00000361234	174	-33	2	28	245	278	27	0.6296	0.8148	ENSG00000170633|ENST00000361234	mature-tRNA-Glu-TTC_5_end_1	0	15	20	15	20	1837	6mer	x	6mer	0		0	RNF34	protein_coding
ENSG00000170633	mature-tRNA-Glu-TTC_5_end_2	ENSG00000170633|ENST00000361234	174	-34.04	2	28	244	278	27	0.6296	0.8148	ENSG00000170633|ENST00000361234	mature-tRNA-Glu-TTC_5_end_2	0	15	20	15	20	1838	6mer	x	6mer	0		0	RNF34	protein_coding
ENSG00000198142	mature-tRNA-Glu-TTC_5_end_1	ENSG00000198142|ENST00000356454	156	-24.06	2	28	2047	2077	27	0.7037	0.7407	ENSG00000198142|ENST00000356454	mature-tRNA-Glu-TTC_5_end_1	0	48	54	48	54	1846	7mer-1a	x	7mer-1a	0		0	SOWAHC	protein_coding
ENSG00000198142	mature-tRNA-Glu-TTC_5_end_2	ENSG00000198142|ENST00000356454	156	-24.23	2	28	2046	2077	27	0.7037	0.7407	ENSG00000198142|ENST00000356454	mature-tRNA-Glu-TTC_5_end_2	0	48	54	48	54	1847	7mer-1a	x	7mer-1a	0		0	SOWAHC	protein_coding
ENSG00000243364	mature-tRNA-Glu-CTC_5_end_1	ENSG00000243364|ENST00000359751	155	-28.13	2	31	220	247	29	0.5517	0.7586	ENSG00000243364|ENST00000359751	mature-tRNA-Glu-CTC_5_end_1	0	31	36	31	36	1853	6mer	x	6mer	0		0	EFNA4	protein_coding
ENSG00000243364	mature-tRNA-Glu-CTC_5_end_2	ENSG00000243364|ENST00000359751	149	-22.87	2	29	222	247	27	0.5185	0.7778	ENSG00000243364|ENST00000359751	mature-tRNA-Glu-CTC_5_end_2	0	31	36	31	36	1854	6mer	x	6mer	0		0	EFNA4	protein_coding
ENSG00000243364	mature-tRNA-Glu-CTC_5_end_3	ENSG00000243364|ENST00000359751	151	-22.87	2	31	221	247	29	0.5172	0.7586	ENSG00000243364|ENST00000359751	mature-tRNA-Glu-CTC_5_end_3	0	31	36	31	36	1855	6mer	x	6mer	0		0	EFNA4	protein_coding
ENSG00000154027	mature-tRNA-Glu-TTC_5_end_1	ENSG00000154027|ENST00000354567	155	-22.38	2	26	899	929	26	0.6923	0.6923	ENSG00000154027|ENST00000354567	mature-tRNA-Glu-TTC_5_end_1	0	30	36	30	36	1888	7mer-m8	x	7mer-m8	0		0	AK5	protein_coding
ENSG00000154027	mature-tRNA-Glu-TTC_5_end_2	ENSG00000154027|ENST00000354567	155	-22.38	2	26	898	929	26	0.6923	0.6923	ENSG00000154027|ENST00000354567	mature-tRNA-Glu-TTC_5_end_2	0	30	36	30	36	1889	7mer-m8	x	7mer-m8	0		0	AK5	protein_coding
ENSG00000167491	mature-tRNA-Glu-CTC_5_end_1	ENSG00000167491|ENST00000360315	165	-35.71	2	32	2035	2071	34	0.5294	0.7647	ENSG00000167491|ENST00000360315	mature-tRNA-Glu-CTC_5_end_1	0	45	50	45	50	1938	6mer	x	6mer	0		0	GATAD2A	protein_coding
ENSG00000167491	mature-tRNA-Glu-CTC_5_end_2	ENSG00000167491|ENST00000360315	159	-31.94	2	30	2038	2071	31	0.4839	0.8065	ENSG00000167491|ENST00000360315	mature-tRNA-Glu-CTC_5_end_2	0	45	50	45	50	1939	6mer	x	6mer	0		0	GATAD2A	protein_coding
ENSG00000167491	mature-tRNA-Glu-CTC_5_end_3	ENSG00000167491|ENST00000360315	163	-33.11	2	31	2036	2071	33	0.5455	0.7879	ENSG00000167491|ENST00000360315	mature-tRNA-Glu-CTC_5_end_3	0	45	50	45	50	1940	6mer	x	6mer	0		0	GATAD2A	protein_coding
ENSG00000090539	mature-tRNA-Glu-CTC_5_end_1	ENSG00000090539|ENST00000356534	161	-33.39	2	32	33	68	33	0.6061	0.6667	ENSG00000090539|ENST00000356534	mature-tRNA-Glu-CTC_5_end_1	0	54	59	54	59	1949	6mer	x	6mer	0		0	CHRD	protein_coding
ENSG00000090539	mature-tRNA-Glu-CTC_5_end_2	ENSG00000090539|ENST00000356534	150	-33.68	2	29	32	68	33	0.5455	0.6667	ENSG00000090539|ENST00000356534	mature-tRNA-Glu-CTC_5_end_2	0	54	59	54	59	1951	6mer	x	6mer	0		0	CHRD	protein_coding
ENSG00000090539	mature-tRNA-Glu-CTC_5_end_3	ENSG00000090539|ENST00000356534	152	-33.39	2	31	34	68	32	0.5625	0.6562	ENSG00000090539|ENST00000356534	mature-tRNA-Glu-CTC_5_end_3	0	54	59	54	59	1953	6mer	x	6mer	0		0	CHRD	protein_coding
ENSG00000197971	mature-tRNA-Glu-TTC_5_end_1	ENSG00000197971|ENST00000359645	154	-27.04	2	32	522	549	31	0.6452	0.6774	ENSG00000197971|ENST00000359645	mature-tRNA-Glu-TTC_5_end_1	0	19	25	19	25	1966	7mer-m8	x	7mer-m8	0		0	MBP	protein_coding
ENSG00000197971	mature-tRNA-Glu-TTC_5_end_2	ENSG00000197971|ENST00000359645	154	-27.75	2	32	521	549	31	0.6452	0.6774	ENSG00000197971|ENST00000359645	mature-tRNA-Glu-TTC_5_end_2	0	19	25	19	25	1967	7mer-m8	x	7mer-m8	0		0	MBP	protein_coding
ENSG00000162885	mature-tRNA-Gly-GCC_5_end_1	ENSG00000162885|ENST00000366600	155	-24.23	2	30	116	143	28	0.6071	0.7143	ENSG00000162885|ENST00000366600	mature-tRNA-Gly-GCC_5_end_1	0	43	49	43	49	2027	7mer-1a	x	7mer-1a	0		0	B3GALNT2	protein_coding
ENSG00000162885	mature-tRNA-Gly-GCC_5_end_2	ENSG00000162885|ENST00000366600	155	-24.23	2	30	115	143	28	0.6071	0.7143	ENSG00000162885|ENST00000366600	mature-tRNA-Gly-GCC_5_end_2	0	43	49	43	49	2028	7mer-1a	x	7mer-1a	0		0	B3GALNT2	protein_coding
ENSG00000162885	mature-tRNA-Gly-GCC_5_end_3	ENSG00000162885|ENST00000366600	157	-24.23	2	33	113	143	32	0.625	0.6875	ENSG00000162885|ENST00000366600	mature-tRNA-Gly-GCC_5_end_3	0	43	49	43	49	2029	7mer-1a	x	7mer-1a	0		0	B3GALNT2	protein_coding
ENSG00000063015	mature-tRNA-Glu-CTC_5_end_1	ENSG00000063015|ENST00000360295	162	-33.62	2	31	372	413	38	0.6053	0.7105	ENSG00000063015|ENST00000360295	mature-tRNA-Glu-CTC_5_end_1	0	41	47	41	47	2072	7mer-1a	x	7mer-1a	0		0	SEZ6	protein_coding
ENSG00000063015	mature-tRNA-Glu-CTC_5_end_2	ENSG00000063015|ENST00000360295	162	-32.3	2	26	377	413	30	0.6333	0.7667	ENSG00000063015|ENST00000360295	mature-tRNA-Glu-CTC_5_end_2	0	41	47	41	47	2073	7mer-1a	x	7mer-1a	0		0	SEZ6	protein_coding
ENSG00000063015	mature-tRNA-Glu-CTC_5_end_3	ENSG00000063015|ENST00000360295	166	-34.49	2	31	373	413	38	0.6053	0.7368	ENSG00000063015|ENST00000360295	mature-tRNA-Glu-CTC_5_end_3	0	41	47	41	47	2074	7mer-1a	x	7mer-1a	0		0	SEZ6	protein_coding
ENSG00000143858	mature-tRNA-Glu-CTC_5_end_1	ENSG00000143858|ENST00000367267	168	-32.85	2	30	2479	2512	29	0.5517	0.7931	ENSG00000143858|ENST00000367267	mature-tRNA-Glu-CTC_5_end_1	0	41	47	41	47	2177	7mer-1a	x	7mer-1a	0		0	SYT2	protein_coding
ENSG00000143858	mature-tRNA-Glu-CTC_5_end_2	ENSG00000143858|ENST00000367267	164	-28.47	2	30	2481	2512	29	0.5172	0.7931	ENSG00000143858|ENST00000367267	mature-tRNA-Glu-CTC_5_end_2	0	41	47	41	47	2178	7mer-1a	x	7mer-1a	0		0	SYT2	protein_coding
ENSG00000143858	mature-tRNA-Glu-CTC_5_end_3	ENSG00000143858|ENST00000367267	164	-28.47	2	30	2480	2512	29	0.5172	0.7931	ENSG00000143858|ENST00000367267	mature-tRNA-Glu-CTC_5_end_3	0	41	47	41	47	2179	7mer-1a	x	7mer-1a	0		0	SYT2	protein_coding
ENSG00000157600	mature-tRNA-Glu-TTC_5_end_1	ENSG00000157600|ENST00000372072	166	-29.31	2	32	2742	2771	30	0.6333	0.7333	ENSG00000157600|ENST00000372072	mature-tRNA-Glu-TTC_5_end_1	0	54	60	54	60	2196	7mer-m8	x	7mer-m8	0		0	TMEM164	protein_coding
ENSG00000157600	mature-tRNA-Glu-TTC_5_end_2	ENSG00000157600|ENST00000372072	166	-29.31	2	32	2741	2771	30	0.6333	0.7333	ENSG00000157600|ENST00000372072	mature-tRNA-Glu-TTC_5_end_2	0	54	60	54	60	2198	7mer-m8	x	7mer-m8	0		0	TMEM164	protein_coding
ENSG00000197122	mature-tRNA-Glu-TTC_5_end_1	ENSG00000197122|ENST00000373578	155	-33.36	2	32	876	913	35	0.6	0.6857	ENSG00000197122|ENST00000373578	mature-tRNA-Glu-TTC_5_end_1	0	22	27	22	27	2202	6mer	x	6mer	0		0	SRC	protein_coding
ENSG00000197122	mature-tRNA-Glu-TTC_5_end_2	ENSG00000197122|ENST00000373578	155	-33.53	2	32	875	913	35	0.6	0.6857	ENSG00000197122|ENST00000373578	mature-tRNA-Glu-TTC_5_end_2	0	22	27	22	27	2203	6mer	x	6mer	0		0	SRC	protein_coding
ENSG00000101216	mature-tRNA-Glu-TTC_5_end_1	ENSG00000101216|ENST00000370077	153	-29.09	2	32	950	980	31	0.5806	0.7097	ENSG00000101216|ENST00000370077	mature-tRNA-Glu-TTC_5_end_1	0	32	37	32	37	2209	6mer	x	6mer	0		0	GMEB2	protein_coding
ENSG00000101216	mature-tRNA-Glu-TTC_5_end_2	ENSG00000101216|ENST00000370077	158	-29.09	2	33	949	980	32	0.5938	0.7188	ENSG00000101216|ENST00000370077	mature-tRNA-Glu-TTC_5_end_2	0	32	37	32	37	2210	6mer	x	6mer	0		0	GMEB2	protein_coding
ENSG00000185920	mature-tRNA-Glu-TTC_5_end_1	ENSG00000185920|ENST00000375290	153	-20.34	2	32	7591	7622	30	0.5	0.7	ENSG00000185920|ENST00000375290	mature-tRNA-Glu-TTC_5_end_1	0	55	60	55	60	2224	6mer	x	6mer	0		0	PTCH1	protein_coding
ENSG00000185920	mature-tRNA-Glu-TTC_5_end_2	ENSG00000185920|ENST00000375290	154	-22.2	2	33	7590	7622	31	0.4839	0.7097	ENSG00000185920|ENST00000375290	mature-tRNA-Glu-TTC_5_end_2	0	55	60	55	60	2225	6mer	x	6mer	0		0	PTCH1	protein_coding
ENSG00000157600	mature-tRNA-Glu-CTC_5_end_1	ENSG00000157600|ENST00000372073	164	-37.74	2	31	3037	3071	31	0.5484	0.7742	ENSG00000157600|ENST00000372073	mature-tRNA-Glu-CTC_5_end_1	0	23	28	23	28	2254	6mer	x	6mer	0		0	TMEM164	protein_coding
ENSG00000157600	mature-tRNA-Glu-CTC_5_end_2	ENSG00000157600|ENST00000372073	155	-34.15	2	21	3040	3071	20	0.55	0.9	ENSG00000157600|ENST00000372073	mature-tRNA-Glu-CTC_5_end_2	0	23	28	23	28	2255	6mer	x	6mer	0		0	TMEM164	protein_coding
ENSG00000157600	mature-tRNA-Glu-CTC_5_end_3	ENSG00000157600|ENST00000372073	160	-35.39	2	31	3038	3071	31	0.5161	0.7742	ENSG00000157600|ENST00000372073	mature-tRNA-Glu-CTC_5_end_3	0	23	28	23	28	2256	6mer	x	6mer	0		0	TMEM164	protein_coding
ENSG00000148356	mature-tRNA-Glu-TTC_5_end_1	ENSG00000148356|ENST00000373324	153	-33.2	2	31	361	390	31	0.6452	0.7097	ENSG00000148356|ENST00000373324	mature-tRNA-Glu-TTC_5_end_1	0	21	26	21	26	2321	6mer	x	6mer	0		0	LRSAM1	protein_coding
ENSG00000148356	mature-tRNA-Glu-TTC_5_end_2	ENSG00000148356|ENST00000373324	153	-33.2	2	31	360	390	31	0.6452	0.7097	ENSG00000148356|ENST00000373324	mature-tRNA-Glu-TTC_5_end_2	0	21	26	21	26	2322	6mer	x	6mer	0		0	LRSAM1	protein_coding
ENSG00000024048	mature-tRNA-Gly-GCC_5_end_1	ENSG00000024048|ENST00000372899	148	-21.73	2	29	1410	1441	27	0.4815	0.6667	ENSG00000024048|ENST00000372899	mature-tRNA-Gly-GCC_5_end_1	0	45	51	45	51	2326	7mer-1a	x	7mer-1a	0		0	UBR2	protein_coding
ENSG00000024048	mature-tRNA-Gly-GCC_5_end_2	ENSG00000024048|ENST00000372899	148	-21.93	2	29	1409	1441	27	0.4815	0.6667	ENSG00000024048|ENST00000372899	mature-tRNA-Gly-GCC_5_end_2	0	45	51	45	51	2327	7mer-1a	x	7mer-1a	0		0	UBR2	protein_coding
ENSG00000024048	mature-tRNA-Gly-GCC_5_end_3	ENSG00000024048|ENST00000372899	148	-21.93	2	29	1408	1441	27	0.4815	0.6667	ENSG00000024048|ENST00000372899	mature-tRNA-Gly-GCC_5_end_3	0	45	51	45	51	2328	7mer-1a	x	7mer-1a	0		0	UBR2	protein_coding
ENSG00000148842	mature-tRNA-Asp-GTC_CCA_end_1	ENSG00000148842|ENST00000369878	159	-46.77	2	37	2879	2918	37	0.5135	0.6486	ENSG00000148842|ENST00000369878	mature-tRNA-Asp-GTC_CCA_end_1	0	50	56	50	56	2344	7mer-1a	x	7mer-1a	0		0	CNNM2	protein_coding
ENSG00000106799	mature-tRNA-Glu-TTC_5_end_1	ENSG00000106799|ENST00000374990	172	-37.39	2	32	146	185	37	0.6486	0.7027	ENSG00000106799|ENST00000374990	mature-tRNA-Glu-TTC_5_end_1	0	54	60	54	60	2408	7mer-1a	x	7mer-1a	0		0	TGFBR1	protein_coding
ENSG00000106799	mature-tRNA-Glu-TTC_5_end_2	ENSG00000106799|ENST00000374990	172	-37.39	2	32	145	185	37	0.6486	0.7027	ENSG00000106799|ENST00000374990	mature-tRNA-Glu-TTC_5_end_2	0	54	60	54	60	2409	7mer-1a	x	7mer-1a	0		0	TGFBR1	protein_coding
ENSG00000117707	mature-tRNA-Glu-TTC_5_end_1	ENSG00000117707|ENST00000366958	171	-30.7	2	31	3558	3593	33	0.6061	0.7576	ENSG00000117707|ENST00000366958	mature-tRNA-Glu-TTC_5_end_1	0	16	22	16	22	2418	7mer-1a	x	7mer-1a	0		0	PROX1	protein_coding
ENSG00000117707	mature-tRNA-Glu-TTC_5_end_2	ENSG00000117707|ENST00000366958	171	-30.7	2	31	3557	3593	33	0.6061	0.7576	ENSG00000117707|ENST00000366958	mature-tRNA-Glu-TTC_5_end_2	0	16	22	16	22	2419	7mer-1a	x	7mer-1a	0		0	PROX1	protein_coding
ENSG00000148408	mature-tRNA-Glu-TTC_5_end_1	ENSG00000148408|ENST00000371372	155	-32.43	2	30	1165	1201	32	0.5312	0.7188	ENSG00000148408|ENST00000371372	mature-tRNA-Glu-TTC_5_end_1	0	46	51	46	51	2430	6mer	x	6mer	0		0	CACNA1B	protein_coding
ENSG00000148408	mature-tRNA-Glu-TTC_5_end_2	ENSG00000148408|ENST00000371372	155	-32.45	2	30	1164	1201	32	0.5312	0.7188	ENSG00000148408|ENST00000371372	mature-tRNA-Glu-TTC_5_end_2	0	46	51	46	51	2431	6mer	x	6mer	0		0	CACNA1B	protein_coding
ENSG00000170734	mature-tRNA-Glu-TTC_5_end_1	ENSG00000170734|ENST00000372236	156	-22.06	2	27	2756	2790	27	0.6296	0.7037	ENSG00000170734|ENST00000372236	mature-tRNA-Glu-TTC_5_end_1	0	27	32	27	32	2452	6mer	x	6mer	0		0	POLH	protein_coding
ENSG00000170734	mature-tRNA-Glu-TTC_5_end_2	ENSG00000170734|ENST00000372236	156	-22.23	2	27	2755	2790	27	0.6296	0.7037	ENSG00000170734|ENST00000372236	mature-tRNA-Glu-TTC_5_end_2	0	27	32	27	32	2453	6mer	x	6mer	0		0	POLH	protein_coding
ENSG00000119396	mature-tRNA-Glu-TTC_5_end_1	ENSG00000119396|ENST00000373840	152	-27.63	2	25	2916	2945	23	0.6522	0.6957	ENSG00000119396|ENST00000373840	mature-tRNA-Glu-TTC_5_end_1	0	38	43	38	43	2562	6mer	x	6mer	0		0	RAB14	protein_coding
ENSG00000119396	mature-tRNA-Glu-TTC_5_end_2	ENSG00000119396|ENST00000373840	152	-27.63	2	25	2915	2945	23	0.6522	0.6957	ENSG00000119396|ENST00000373840	mature-tRNA-Glu-TTC_5_end_2	0	38	43	38	43	2563	6mer	x	6mer	0		0	RAB14	protein_coding
ENSG00000134222	mature-tRNA-Glu-CTC_5_end_1	ENSG00000134222|ENST00000369903	154	-27.57	2	28	100	131	28	0.5714	0.6786	ENSG00000134222|ENST00000369903	mature-tRNA-Glu-CTC_5_end_1	0	17	23	17	23	2573	7mer-m8	x	7mer-m8	0		0	PSRC1	protein_coding
ENSG00000134222	mature-tRNA-Glu-CTC_5_end_2	ENSG00000134222|ENST00000369903	156	-28.44	2	30	99	131	30	0.5667	0.6667	ENSG00000134222|ENST00000369903	mature-tRNA-Glu-CTC_5_end_2	0	17	23	17	23	2574	7mer-m8	x	7mer-m8	0		0	PSRC1	protein_coding
ENSG00000134222	mature-tRNA-Glu-CTC_5_end_3	ENSG00000134222|ENST00000369903	156	-29.69	2	30	98	131	30	0.5667	0.6667	ENSG00000134222|ENST00000369903	mature-tRNA-Glu-CTC_5_end_3	0	17	23	17	23	2575	7mer-m8	x	7mer-m8	0		0	PSRC1	protein_coding
ENSG00000102606	mature-tRNA-Glu-CTC_5_end_1	ENSG00000102606|ENST00000375736	170	-37.22	2	32	471	500	30	0.6333	0.7667	ENSG00000102606|ENST00000375736	mature-tRNA-Glu-CTC_5_end_1	0	52	58	52	58	2583	7mer-m8	x	7mer-m8	0		0	ARHGEF7	protein_coding
ENSG00000102606	mature-tRNA-Glu-CTC_5_end_2	ENSG00000102606|ENST00000375736	161	-34.96	2	29	466	500	31	0.5484	0.8065	ENSG00000102606|ENST00000375736	mature-tRNA-Glu-CTC_5_end_2	0	52	58	52	58	2585	7mer-m8	x	7mer-m8	0		0	ARHGEF7	protein_coding
ENSG00000102606	mature-tRNA-Glu-CTC_5_end_3	ENSG00000102606|ENST00000375736	165	-35.2	2	31	472	500	29	0.6207	0.7586	ENSG00000102606|ENST00000375736	mature-tRNA-Glu-CTC_5_end_3	0	52	58	52	58	2587	7mer-m8	x	7mer-m8	0		0	ARHGEF7	protein_coding
ENSG00000101452	mature-tRNA-Gly-GCC_5_end_1	ENSG00000101452|ENST00000373325	158	-20.75	2	31	402	432	30	0.5333	0.7667	ENSG00000101452|ENST00000373325	mature-tRNA-Gly-GCC_5_end_1	0	43	48	43	48	2611	6mer	x	6mer	0		0	DHX35	protein_coding
ENSG00000101452	mature-tRNA-Gly-GCC_5_end_2	ENSG00000101452|ENST00000373325	158	-21.08	2	31	401	432	30	0.5333	0.7667	ENSG00000101452|ENST00000373325	mature-tRNA-Gly-GCC_5_end_2	0	43	48	43	48	2612	6mer	x	6mer	0		0	DHX35	protein_coding
ENSG00000101452	mature-tRNA-Gly-GCC_5_end_3	ENSG00000101452|ENST00000373325	158	-22.22	2	31	400	432	30	0.5333	0.7667	ENSG00000101452|ENST00000373325	mature-tRNA-Gly-GCC_5_end_3	0	43	48	43	48	2613	6mer	x	6mer	0		0	DHX35	protein_coding
ENSG00000144285	mature-tRNA-Glu-TTC_5_end_1	ENSG00000144285|ENST00000375405	155	-25.31	2	32	1828	1856	31	0.6129	0.7097	ENSG00000144285|ENST00000375405	mature-tRNA-Glu-TTC_5_end_1	0	30	35	30	35	2632	6mer	x	6mer	0		0	SCN1A	protein_coding
ENSG00000144285	mature-tRNA-Glu-TTC_5_end_2	ENSG00000144285|ENST00000375405	155	-25.31	2	32	1827	1856	31	0.6129	0.7097	ENSG00000144285|ENST00000375405	mature-tRNA-Glu-TTC_5_end_2	0	30	35	30	35	2633	6mer	x	6mer	0		0	SCN1A	protein_coding
ENSG00000117748	mature-tRNA-Glu-CTC_5_end_1	ENSG00000117748|ENST00000373912	157	-26.12	2	32	336	370	32	0.5625	0.6875	ENSG00000117748|ENST00000373912	mature-tRNA-Glu-CTC_5_end_1	0	35	40	35	40	2671	6mer	x	6mer	0		0	RPA2	protein_coding
ENSG00000117748	mature-tRNA-Glu-CTC_5_end_2	ENSG00000117748|ENST00000373912	152	-24.59	2	27	338	370	27	0.6296	0.6667	ENSG00000117748|ENST00000373912	mature-tRNA-Glu-CTC_5_end_2	0	35	40	35	40	2672	6mer	x	6mer	0		0	RPA2	protein_coding
ENSG00000117748	mature-tRNA-Glu-CTC_5_end_3	ENSG00000117748|ENST00000373912	156	-24.83	2	31	337	370	31	0.5806	0.6774	ENSG00000117748|ENST00000373912	mature-tRNA-Glu-CTC_5_end_3	0	35	40	35	40	2673	6mer	x	6mer	0		0	RPA2	protein_coding
ENSG00000196586	mature-tRNA-Glu-TTC_5_end_1	ENSG00000196586|ENST00000369985	157	-23.38	2	31	4150	4183	30	0.5	0.7333	ENSG00000196586|ENST00000369985	mature-tRNA-Glu-TTC_5_end_1	0	41	46	41	46	2674	6mer	x	6mer	0		0	MYO6	protein_coding
ENSG00000196586	mature-tRNA-Glu-TTC_5_end_2	ENSG00000196586|ENST00000369985	158	-23.38	2	33	4148	4183	33	0.5152	0.7273	ENSG00000196586|ENST00000369985	mature-tRNA-Glu-TTC_5_end_2	0	41	46	41	46	2675	6mer	x	6mer	0		0	MYO6	protein_coding
ENSG00000163485	mature-tRNA-Glu-TTC_5_end_1	ENSG00000163485|ENST00000367236	172	-32.75	2	30	1052	1085	29	0.6552	0.7241	ENSG00000163485|ENST00000367236	mature-tRNA-Glu-TTC_5_end_1	0	29	34	29	34	2687	6mer	x	6mer	0		0	ADORA1	protein_coding
ENSG00000163485	mature-tRNA-Glu-TTC_5_end_2	ENSG00000163485|ENST00000367236	172	-32.96	2	30	1051	1085	29	0.6552	0.7241	ENSG00000163485|ENST00000367236	mature-tRNA-Glu-TTC_5_end_2	0	29	34	29	34	2688	6mer	x	6mer	0		0	ADORA1	protein_coding
ENSG00000122694	mature-tRNA-Glu-CTC_5_end_1	ENSG00000122694|ENST00000377960	164	-31.24	2	30	1311	1344	29	0.5862	0.7241	ENSG00000122694|ENST00000377960	mature-tRNA-Glu-CTC_5_end_1	0	24	30	24	30	2746	7mer-1a	x	7mer-1a	0		0	GLIPR2	protein_coding
ENSG00000122694	mature-tRNA-Glu-CTC_5_end_2	ENSG00000122694|ENST00000377960	164	-30.14	2	30	1313	1344	29	0.5862	0.7241	ENSG00000122694|ENST00000377960	mature-tRNA-Glu-CTC_5_end_2	0	24	30	24	30	2747	7mer-1a	x	7mer-1a	0		0	GLIPR2	protein_coding
ENSG00000122694	mature-tRNA-Glu-CTC_5_end_3	ENSG00000122694|ENST00000377960	164	-31.26	2	30	1312	1344	29	0.5862	0.7241	ENSG00000122694|ENST00000377960	mature-tRNA-Glu-CTC_5_end_3	0	24	30	24	30	2748	7mer-1a	x	7mer-1a	0		0	GLIPR2	protein_coding
ENSG00000131697	mature-tRNA-Glu-TTC_5_end_1	ENSG00000131697|ENST00000378156	160	-26.57	2	27	248	279	25	0.6	0.76	ENSG00000131697|ENST00000378156	mature-tRNA-Glu-TTC_5_end_1	0	27	32	27	32	2767	6mer	x	6mer	0		0	NPHP4	protein_coding
ENSG00000131697	mature-tRNA-Glu-TTC_5_end_2	ENSG00000131697|ENST00000378156	160	-27.78	2	27	247	279	25	0.6	0.76	ENSG00000131697|ENST00000378156	mature-tRNA-Glu-TTC_5_end_2	0	27	32	27	32	2768	6mer	x	6mer	0		0	NPHP4	protein_coding
ENSG00000129159	mature-tRNA-Glu-CTC_5_end_1	ENSG00000129159|ENST00000379472	152	-26.47	2	28	3803	3837	29	0.5517	0.7241	ENSG00000129159|ENST00000379472	mature-tRNA-Glu-CTC_5_end_1	0	20	26	20	26	2770	7mer-1a	x	7mer-1a	0		0	KCNC1	protein_coding
ENSG00000129159	mature-tRNA-Glu-CTC_5_end_2	ENSG00000129159|ENST00000379472	149	-24.36	2	16	3808	3837	14	0.7857	0.8571	ENSG00000129159|ENST00000379472	mature-tRNA-Glu-CTC_5_end_2	0	20	26	20	26	2771	7mer-1a	x	7mer-1a	0		0	KCNC1	protein_coding
ENSG00000129159	mature-tRNA-Glu-CTC_5_end_3	ENSG00000129159|ENST00000379472	149	-26.23	2	16	3807	3837	14	0.7857	0.8571	ENSG00000129159|ENST00000379472	mature-tRNA-Glu-CTC_5_end_3	0	20	26	20	26	2772	7mer-1a	x	7mer-1a	0		0	KCNC1	protein_coding
ENSG00000004777	mature-tRNA-Glu-TTC_5_end_1	ENSG00000004777|ENST00000378944	154	-33.39	2	32	100	139	38	0.5789	0.6842	ENSG00000004777|ENST00000378944	mature-tRNA-Glu-TTC_5_end_1	0	37	42	37	42	2776	6mer	x	6mer	0		0	ARHGAP33	protein_coding
ENSG00000004777	mature-tRNA-Glu-TTC_5_end_2	ENSG00000004777|ENST00000378944	154	-33.39	2	32	99	139	38	0.5789	0.6842	ENSG00000004777|ENST00000378944	mature-tRNA-Glu-TTC_5_end_2	0	37	42	37	42	2777	6mer	x	6mer	0		0	ARHGAP33	protein_coding
ENSG00000198040	mature-tRNA-Glu-TTC_5_end_1	ENSG00000198040|ENST00000392319	155	-20.16	2	28	4109	4142	29	0.6207	0.6897	ENSG00000198040|ENST00000392319	mature-tRNA-Glu-TTC_5_end_1	0	54	60	54	60	2782	7mer-1a	x	7mer-1a	0		0	ZNF84	protein_coding
ENSG00000198040	mature-tRNA-Glu-TTC_5_end_2	ENSG00000198040|ENST00000392319	155	-20.33	2	28	4108	4142	29	0.6207	0.6897	ENSG00000198040|ENST00000392319	mature-tRNA-Glu-TTC_5_end_2	0	54	60	54	60	2783	7mer-1a	x	7mer-1a	0		0	ZNF84	protein_coding
ENSG00000092820	mature-tRNA-Glu-CTC_5_end_1	ENSG00000092820|ENST00000392177	160	-31.05	2	26	131	160	24	0.625	0.8333	ENSG00000092820|ENST00000392177	mature-tRNA-Glu-CTC_5_end_1	0	49	54	49	54	2806	6mer	x	6mer	0		0	EZR	protein_coding
ENSG00000092820	mature-tRNA-Glu-CTC_5_end_2	ENSG00000092820|ENST00000392177	156	-29.18	2	26	133	160	24	0.5833	0.8333	ENSG00000092820|ENST00000392177	mature-tRNA-Glu-CTC_5_end_2	0	49	54	49	54	2807	6mer	x	6mer	0		0	EZR	protein_coding
ENSG00000092820	mature-tRNA-Glu-CTC_5_end_3	ENSG00000092820|ENST00000392177	156	-29.18	2	26	132	160	24	0.5833	0.8333	ENSG00000092820|ENST00000392177	mature-tRNA-Glu-CTC_5_end_3	0	49	54	49	54	2808	6mer	x	6mer	0		0	EZR	protein_coding
ENSG00000102572	mature-tRNA-Val-AAC_5_end_1	ENSG00000102572|ENST00000376547	146	-19.91	2	11	442	459	9	0.8889	1	ENSG00000102572|ENST00000376547	mature-tRNA-Val-AAC_5_end_1	0	55	60	55	60	2816	6mer	x	6mer	0		0	STK24	protein_coding
ENSG00000102572	mature-tRNA-Val-CAC_5_end_1	ENSG00000102572|ENST00000376547	158	-21.99	2	23	427	459	21	0.619	0.7619	ENSG00000102572|ENST00000376547	mature-tRNA-Val-CAC_5_end_1	0	55	60	55	60	2817	6mer	x	6mer	0		0	STK24	protein_coding
ENSG00000240682	mature-tRNA-Glu-TTC_5_end_1	ENSG00000240682|ENST00000393295	155	-31.47	2	32	2469	2501	30	0.5333	0.6333	ENSG00000240682|ENST00000393295	mature-tRNA-Glu-TTC_5_end_1	0	28	33	28	33	2881	6mer	x	6mer	0		0	ISY1	protein_coding
ENSG00000240682	mature-tRNA-Glu-TTC_5_end_2	ENSG00000240682|ENST00000393295	155	-32.13	2	32	2468	2501	30	0.5333	0.6333	ENSG00000240682|ENST00000393295	mature-tRNA-Glu-TTC_5_end_2	0	28	33	28	33	2882	6mer	x	6mer	0		0	ISY1	protein_coding
ENSG00000197063	mature-tRNA-Glu-CTC_5_end_1	ENSG00000197063|ENST00000392366	166	-32.55	2	32	226	261	33	0.5758	0.697	ENSG00000197063|ENST00000392366	mature-tRNA-Glu-CTC_5_end_1	0	47	52	47	52	2996	6mer	x	6mer	0		0	MAFG	protein_coding
ENSG00000197063	mature-tRNA-Glu-CTC_5_end_2	ENSG00000197063|ENST00000392366	163	-30.82	2	24	231	261	22	0.6818	0.7273	ENSG00000197063|ENST00000392366	mature-tRNA-Glu-CTC_5_end_2	0	47	52	47	52	2997	6mer	x	6mer	0		0	MAFG	protein_coding
ENSG00000197063	mature-tRNA-Glu-CTC_5_end_3	ENSG00000197063|ENST00000392366	163	-31.81	2	24	230	261	22	0.6818	0.7273	ENSG00000197063|ENST00000392366	mature-tRNA-Glu-CTC_5_end_3	0	47	52	47	52	2998	6mer	x	6mer	0		0	MAFG	protein_coding
ENSG00000112851	mature-tRNA-Glu-TTC_5_end_1	ENSG00000112851|ENST00000380943	150	-20.02	2	25	419	455	27	0.5926	0.7037	ENSG00000112851|ENST00000380943	mature-tRNA-Glu-TTC_5_end_1	0	30	36	30	36	3093	7mer-1a	x	7mer-1a	0		0	ERBIN	protein_coding
ENSG00000112851	mature-tRNA-Glu-TTC_5_end_2	ENSG00000112851|ENST00000380943	150	-20.02	2	25	418	455	27	0.5926	0.7037	ENSG00000112851|ENST00000380943	mature-tRNA-Glu-TTC_5_end_2	0	30	36	30	36	3094	7mer-1a	x	7mer-1a	0		0	ERBIN	protein_coding
ENSG00000138092	mature-tRNA-Glu-CTC_5_end_1	ENSG00000138092|ENST00000380834	152	-24.69	2	28	2751	2784	31	0.5806	0.6774	ENSG00000138092|ENST00000380834	mature-tRNA-Glu-CTC_5_end_1	0	18	23	18	23	3096	6mer	x	6mer	0		0	CENPO	protein_coding
ENSG00000138092	mature-tRNA-Glu-CTC_5_end_2	ENSG00000138092|ENST00000380834	152	-26.89	2	28	2750	2784	31	0.5806	0.6774	ENSG00000138092|ENST00000380834	mature-tRNA-Glu-CTC_5_end_2	0	18	23	18	23	3097	6mer	x	6mer	0		0	CENPO	protein_coding
ENSG00000138092	mature-tRNA-Glu-CTC_5_end_3	ENSG00000138092|ENST00000380834	152	-27.13	2	28	2749	2784	31	0.5806	0.6774	ENSG00000138092|ENST00000380834	mature-tRNA-Glu-CTC_5_end_3	0	18	23	18	23	3098	6mer	x	6mer	0		0	CENPO	protein_coding
ENSG00000160882	mature-tRNA-Glu-CTC_5_end_1	ENSG00000160882|ENST00000377675	162	-32.58	2	28	131	162	30	0.6667	0.7333	ENSG00000160882|ENST00000377675	mature-tRNA-Glu-CTC_5_end_1	0	48	53	48	53	3099	6mer	x	6mer	0		0	CYP11B1	protein_coding
ENSG00000160882	mature-tRNA-Glu-CTC_5_end_2	ENSG00000160882|ENST00000377675	162	-32.59	2	28	130	162	30	0.6667	0.7333	ENSG00000160882|ENST00000377675	mature-tRNA-Glu-CTC_5_end_2	0	48	53	48	53	3100	6mer	x	6mer	0		0	CYP11B1	protein_coding
ENSG00000160882	mature-tRNA-Glu-CTC_5_end_3	ENSG00000160882|ENST00000377675	162	-32.86	2	28	129	162	30	0.6667	0.7333	ENSG00000160882|ENST00000377675	mature-tRNA-Glu-CTC_5_end_3	0	48	53	48	53	3101	6mer	x	6mer	0		0	CYP11B1	protein_coding
ENSG00000087274	mature-tRNA-Glu-TTC_5_end_1	ENSG00000087274|ENST00000398125	153	-33.15	2	31	1470	1506	34	0.5882	0.7059	ENSG00000087274|ENST00000398125	mature-tRNA-Glu-TTC_5_end_1	0	31	36	31	36	3274	6mer	x	6mer	0		0	ADD1	protein_coding
ENSG00000087274	mature-tRNA-Glu-TTC_5_end_2	ENSG00000087274|ENST00000398125	155	-33.15	2	33	1469	1506	36	0.5833	0.6944	ENSG00000087274|ENST00000398125	mature-tRNA-Glu-TTC_5_end_2	0	31	36	31	36	3275	6mer	x	6mer	0		0	ADD1	protein_coding
ENSG00000151067	mature-tRNA-Glu-TTC_5_end_1	ENSG00000151067|ENST00000399641	166	-31.58	2	26	4158	4188	24	0.6667	0.7917	ENSG00000151067|ENST00000399641	mature-tRNA-Glu-TTC_5_end_1	0	28	33	28	33	3297	6mer	x	6mer	0		0	CACNA1C	protein_coding
ENSG00000151067	mature-tRNA-Glu-TTC_5_end_2	ENSG00000151067|ENST00000399641	166	-32.47	2	26	4157	4188	24	0.6667	0.7917	ENSG00000151067|ENST00000399641	mature-tRNA-Glu-TTC_5_end_2	0	28	33	28	33	3298	6mer	x	6mer	0		0	CACNA1C	protein_coding
ENSG00000095015	mature-tRNA-Glu-CTC_5_end_1	ENSG00000095015|ENST00000399503	166	-24.97	2	31	527	559	29	0.5172	0.7586	ENSG00000095015|ENST00000399503	mature-tRNA-Glu-CTC_5_end_1	0	17	22	17	22	3305	6mer	x	6mer	0		0	MAP3K1	protein_coding
ENSG00000095015	mature-tRNA-Glu-CTC_5_end_2	ENSG00000095015|ENST00000399503	161	-25.1	2	30	529	559	28	0.5	0.75	ENSG00000095015|ENST00000399503	mature-tRNA-Glu-CTC_5_end_2	0	17	22	17	22	3306	6mer	x	6mer	0		0	MAP3K1	protein_coding
ENSG00000095015	mature-tRNA-Glu-CTC_5_end_3	ENSG00000095015|ENST00000399503	166	-25.1	2	31	528	559	29	0.5172	0.7586	ENSG00000095015|ENST00000399503	mature-tRNA-Glu-CTC_5_end_3	0	17	22	17	22	3307	6mer	x	6mer	0		0	MAP3K1	protein_coding
ENSG00000136842	mature-tRNA-Gly-GCC_5_end_1	ENSG00000136842|ENST00000395211	151	-15.93	2	31	607	636	29	0.5862	0.6207	ENSG00000136842|ENST00000395211	mature-tRNA-Gly-GCC_5_end_1	0	22	27	22	27	3321	6mer	x	6mer	0		0	TMOD1	protein_coding
ENSG00000136842	mature-tRNA-Gly-GCC_5_end_2	ENSG00000136842|ENST00000395211	151	-16.4	2	31	606	636	29	0.5862	0.6207	ENSG00000136842|ENST00000395211	mature-tRNA-Gly-GCC_5_end_2	0	22	27	22	27	3322	6mer	x	6mer	0		0	TMOD1	protein_coding
ENSG00000136842	mature-tRNA-Gly-GCC_5_end_3	ENSG00000136842|ENST00000395211	153	-17.79	2	33	605	636	31	0.5806	0.6129	ENSG00000136842|ENST00000395211	mature-tRNA-Gly-GCC_5_end_3	0	22	27	22	27	3323	6mer	x	6mer	0		0	TMOD1	protein_coding
ENSG00000156284	mature-tRNA-Glu-TTC_5_end_1	ENSG00000156284|ENST00000399899	165	-27.83	2	28	978	1008	27	0.7037	0.7778	ENSG00000156284|ENST00000399899	mature-tRNA-Glu-TTC_5_end_1	0	49	54	49	54	3334	6mer	x	6mer	0		0	CLDN8	protein_coding
ENSG00000156284	mature-tRNA-Glu-TTC_5_end_2	ENSG00000156284|ENST00000399899	165	-28.7	2	28	977	1008	27	0.7037	0.7778	ENSG00000156284|ENST00000399899	mature-tRNA-Glu-TTC_5_end_2	0	49	54	49	54	3335	6mer	x	6mer	0		0	CLDN8	protein_coding
ENSG00000087111	mature-tRNA-Glu-CTC_5_end_1	ENSG00000087111|ENST00000395346	176	-35.52	2	31	187	215	29	0.7241	0.7586	ENSG00000087111|ENST00000395346	mature-tRNA-Glu-CTC_5_end_1	0	36	41	36	41	3366	6mer	x	6mer	0		0	PIGS	protein_coding
ENSG00000087111	mature-tRNA-Glu-CTC_5_end_2	ENSG00000087111|ENST00000395346	171	-35.81	2	30	189	215	28	0.7143	0.75	ENSG00000087111|ENST00000395346	mature-tRNA-Glu-CTC_5_end_2	0	36	41	36	41	3367	6mer	x	6mer	0		0	PIGS	protein_coding
ENSG00000087111	mature-tRNA-Glu-CTC_5_end_3	ENSG00000087111|ENST00000395346	176	-35.81	2	31	188	215	29	0.7241	0.7586	ENSG00000087111|ENST00000395346	mature-tRNA-Glu-CTC_5_end_3	0	36	41	36	41	3368	6mer	x	6mer	0		0	PIGS	protein_coding
ENSG00000090857	mature-tRNA-Glu-CTC_5_end_1	ENSG00000090857|ENST00000398122	151	-25.63	2	12	1	12	10	0.9	1	ENSG00000090857|ENST00000398122	mature-tRNA-Glu-CTC_5_end_1	0	16	21	16	21	3388	6mer	x	6mer	0		0	PDPR	protein_coding
ENSG00000090857	mature-tRNA-Glu-CTC_5_end_2	ENSG00000090857|ENST00000398122	151	-22.36	2	12	1	12	10	0.9	1	ENSG00000090857|ENST00000398122	mature-tRNA-Glu-CTC_5_end_2	0	16	21	16	21	3389	6mer	x	6mer	0		0	PDPR	protein_coding
ENSG00000090857	mature-tRNA-Glu-CTC_5_end_3	ENSG00000090857|ENST00000398122	151	-22.36	2	12	1	12	10	0.9	1	ENSG00000090857|ENST00000398122	mature-tRNA-Glu-CTC_5_end_3	0	16	21	16	21	3390	6mer	x	6mer	0		0	PDPR	protein_coding
ENSG00000215218	mature-tRNA-Glu-CTC_5_end_1	ENSG00000215218|ENST00000399816	169	-30.8	2	27	3005	3034	27	0.7407	0.7778	ENSG00000215218|ENST00000399816	mature-tRNA-Glu-CTC_5_end_1	0	18	24	18	24	3498	7mer-1a	x	7mer-1a	0		0	UBE2QL1	protein_coding
ENSG00000215218	mature-tRNA-Glu-CTC_5_end_2	ENSG00000215218|ENST00000399816	169	-30.8	2	27	3004	3034	27	0.7407	0.7778	ENSG00000215218|ENST00000399816	mature-tRNA-Glu-CTC_5_end_2	0	18	24	18	24	3499	7mer-1a	x	7mer-1a	0		0	UBE2QL1	protein_coding
ENSG00000215218	mature-tRNA-Glu-CTC_5_end_3	ENSG00000215218|ENST00000399816	169	-30.8	2	27	3003	3034	27	0.7407	0.7778	ENSG00000215218|ENST00000399816	mature-tRNA-Glu-CTC_5_end_3	0	18	24	18	24	3500	7mer-1a	x	7mer-1a	0		0	UBE2QL1	protein_coding
ENSG00000167772	mature-tRNA-Glu-CTC_5_end_1	ENSG00000167772|ENST00000393962	154	-29.24	2	30	321	355	31	0.5161	0.7419	ENSG00000167772|ENST00000393962	mature-tRNA-Glu-CTC_5_end_1	0	32	38	32	38	3520	7mer-m8	x	7mer-m8	0		0	ANGPTL4	protein_coding
ENSG00000167772	mature-tRNA-Glu-CTC_5_end_2	ENSG00000167772|ENST00000393962	156	-27.77	2	30	323	355	30	0.5333	0.7	ENSG00000167772|ENST00000393962	mature-tRNA-Glu-CTC_5_end_2	0	32	38	32	38	3521	7mer-m8	x	7mer-m8	0		0	ANGPTL4	protein_coding
ENSG00000167772	mature-tRNA-Glu-CTC_5_end_3	ENSG00000167772|ENST00000393962	156	-27.77	2	30	322	355	30	0.5333	0.7	ENSG00000167772|ENST00000393962	mature-tRNA-Glu-CTC_5_end_3	0	32	38	32	38	3522	7mer-m8	x	7mer-m8	0		0	ANGPTL4	protein_coding
ENSG00000168256	mature-tRNA-Glu-CTC_5_end_1	ENSG00000168256|ENST00000393885	165	-45.09	2	31	1165	1201	35	0.6	0.7429	ENSG00000168256|ENST00000393885	mature-tRNA-Glu-CTC_5_end_1	0	28	33	28	33	3538	6mer	x	6mer	0		0	NKIRAS2	protein_coding
ENSG00000168256	mature-tRNA-Glu-CTC_5_end_2	ENSG00000168256|ENST00000393885	161	-40.41	2	28	1168	1201	29	0.6207	0.7241	ENSG00000168256|ENST00000393885	mature-tRNA-Glu-CTC_5_end_2	0	28	33	28	33	3539	6mer	x	6mer	0		0	NKIRAS2	protein_coding
ENSG00000168256	mature-tRNA-Glu-CTC_5_end_3	ENSG00000168256|ENST00000393885	164	-41.82	2	31	1166	1201	33	0.5758	0.7273	ENSG00000168256|ENST00000393885	mature-tRNA-Glu-CTC_5_end_3	0	28	33	28	33	3540	6mer	x	6mer	0		0	NKIRAS2	protein_coding
ENSG00000100280	mature-tRNA-Glu-TTC_5_end_1	ENSG00000100280|ENST00000405198	160	-32.64	2	32	204	241	35	0.5429	0.7429	ENSG00000100280|ENST00000405198	mature-tRNA-Glu-TTC_5_end_1	0	24	31	24	31	3614	8mer-1a	x	8mer-1a	0		0	AP1B1	protein_coding
ENSG00000100280	mature-tRNA-Glu-TTC_5_end_2	ENSG00000100280|ENST00000405198	160	-32.64	2	32	203	241	35	0.5429	0.7429	ENSG00000100280|ENST00000405198	mature-tRNA-Glu-TTC_5_end_2	0	24	31	24	31	3615	8mer-1a	x	8mer-1a	0		0	AP1B1	protein_coding
ENSG00000151116	mature-tRNA-Gly-GCC_5_end_1	ENSG00000151116|ENST00000396196	156	-17.73	2	24	921	948	22	0.6364	0.7727	ENSG00000151116|ENST00000396196	mature-tRNA-Gly-GCC_5_end_1	0	48	55	48	55	3630	8mer-1a	x	8mer-1a	0		0	UEVLD	protein_coding
ENSG00000151116	mature-tRNA-Gly-GCC_5_end_2	ENSG00000151116|ENST00000396196	156	-17.73	2	24	918	948	22	0.6364	0.7727	ENSG00000151116|ENST00000396196	mature-tRNA-Gly-GCC_5_end_2	0	48	55	48	55	3631	8mer-1a	x	8mer-1a	0		0	UEVLD	protein_coding
ENSG00000151116	mature-tRNA-Gly-GCC_5_end_3	ENSG00000151116|ENST00000396196	157	-17.73	2	33	917	948	31	0.5484	0.6774	ENSG00000151116|ENST00000396196	mature-tRNA-Gly-GCC_5_end_3	0	48	55	48	55	3632	8mer-1a	x	8mer-1a	0		0	UEVLD	protein_coding
ENSG00000101938	mature-tRNA-Glu-TTC_5_end_1	ENSG00000101938|ENST00000394797	159	-29.31	2	32	194	223	32	0.5938	0.75	ENSG00000101938|ENST00000394797	mature-tRNA-Glu-TTC_5_end_1	0	48	55	48	55	3682	8mer-1a	x	8mer-1a	0		0	CHRDL1	protein_coding
ENSG00000101938	mature-tRNA-Glu-TTC_5_end_2	ENSG00000101938|ENST00000394797	164	-30.41	2	33	193	223	33	0.6061	0.7576	ENSG00000101938|ENST00000394797	mature-tRNA-Glu-TTC_5_end_2	0	48	55	48	55	3683	8mer-1a	x	8mer-1a	0		0	CHRDL1	protein_coding
ENSG00000132535	mature-tRNA-Glu-CTC_5_end_1	ENSG00000132535|ENST00000399506	169	-33.54	2	30	2519	2549	28	0.6429	0.7857	ENSG00000132535|ENST00000399506	mature-tRNA-Glu-CTC_5_end_1	0	34	40	34	40	3684	7mer-m8	x	7mer-m8	0		0	DLG4	protein_coding
ENSG00000132535	mature-tRNA-Glu-CTC_5_end_2	ENSG00000132535|ENST00000399506	169	-33.41	2	30	2521	2549	28	0.6429	0.7857	ENSG00000132535|ENST00000399506	mature-tRNA-Glu-CTC_5_end_2	0	34	40	34	40	3685	7mer-m8	x	7mer-m8	0		0	DLG4	protein_coding
ENSG00000132535	mature-tRNA-Glu-CTC_5_end_3	ENSG00000132535|ENST00000399506	169	-33.41	2	30	2520	2549	28	0.6429	0.7857	ENSG00000132535|ENST00000399506	mature-tRNA-Glu-CTC_5_end_3	0	34	40	34	40	3686	7mer-m8	x	7mer-m8	0		0	DLG4	protein_coding
ENSG00000076984	mature-tRNA-Glu-TTC_5_end_1	ENSG00000076984|ENST00000397983	153	-29.13	2	32	1015	1050	33	0.5152	0.697	ENSG00000076984|ENST00000397983	mature-tRNA-Glu-TTC_5_end_1	0	25	31	25	31	3696	7mer-m8	x	7mer-m8	0		0	MAP2K7	protein_coding
ENSG00000076984	mature-tRNA-Glu-TTC_5_end_2	ENSG00000076984|ENST00000397983	154	-30.23	2	33	1014	1050	34	0.5	0.7059	ENSG00000076984|ENST00000397983	mature-tRNA-Glu-TTC_5_end_2	0	25	31	25	31	3697	7mer-m8	x	7mer-m8	0		0	MAP2K7	protein_coding
ENSG00000144524	mature-tRNA-Gly-GCC_5_end_1	ENSG00000144524|ENST00000410017	154	-29.11	2	24	216	250	25	0.6	0.72	ENSG00000144524|ENST00000410017	mature-tRNA-Gly-GCC_5_end_1	0	55	60	55	60	3701	6mer	x	6mer	0		0	COPS7B	protein_coding
ENSG00000144524	mature-tRNA-Gly-GCC_5_end_2	ENSG00000144524|ENST00000410017	154	-29.15	2	24	215	250	25	0.6	0.72	ENSG00000144524|ENST00000410017	mature-tRNA-Gly-GCC_5_end_2	0	55	60	55	60	3702	6mer	x	6mer	0		0	COPS7B	protein_coding
ENSG00000144524	mature-tRNA-Gly-GCC_5_end_3	ENSG00000144524|ENST00000410017	154	-29.42	2	24	214	250	25	0.6	0.72	ENSG00000144524|ENST00000410017	mature-tRNA-Gly-GCC_5_end_3	0	55	60	55	60	3703	6mer	x	6mer	0		0	COPS7B	protein_coding
ENSG00000160862	mature-tRNA-Glu-TTC_5_end_1	ENSG00000160862|ENST00000419575	175	-36.44	2	32	185	217	32	0.6562	0.75	ENSG00000160862|ENST00000419575	mature-tRNA-Glu-TTC_5_end_1	0	18	23	18	23	3717	6mer	x	6mer	0		0	AZGP1	protein_coding
ENSG00000160862	mature-tRNA-Glu-TTC_5_end_2	ENSG00000160862|ENST00000419575	176	-37.14	2	33	184	217	33	0.6364	0.7576	ENSG00000160862|ENST00000419575	mature-tRNA-Glu-TTC_5_end_2	0	18	23	18	23	3718	6mer	x	6mer	0		0	AZGP1	protein_coding
ENSG00000144057	mature-tRNA-Glu-CTC_5_end_1	ENSG00000144057|ENST00000409382	141	-24.77	2	17	3839	3869	15	0.6667	0.8	ENSG00000144057|ENST00000409382	mature-tRNA-Glu-CTC_5_end_1	0	48	53	48	53	3962	6mer	x	6mer	0		0	ST6GAL2	protein_coding
ENSG00000144057	mature-tRNA-Glu-CTC_5_end_2	ENSG00000144057|ENST00000409382	140	-21.05	2	9	3839	3869	7	1	1	ENSG00000144057|ENST00000409382	mature-tRNA-Glu-CTC_5_end_2	0	48	53	48	53	3963	6mer	x	6mer	0		0	ST6GAL2	protein_coding
ENSG00000144057	mature-tRNA-Glu-CTC_5_end_3	ENSG00000144057|ENST00000409382	140	-22.1	2	9	3838	3869	7	1	1	ENSG00000144057|ENST00000409382	mature-tRNA-Glu-CTC_5_end_3	0	48	53	48	53	3964	6mer	x	6mer	0		0	ST6GAL2	protein_coding
ENSG00000198561	mature-tRNA-Asp-GTC_CCA_end_1	ENSG00000198561|ENST00000415361	160	-36.08	2	37	1073	1105	35	0.5429	0.7429	ENSG00000198561|ENST00000415361	mature-tRNA-Asp-GTC_CCA_end_1	0	50	56	50	56	3987	7mer-1a	x	7mer-1a	0		0	CTNND1	protein_coding
ENSG00000185920	mature-tRNA-Glu-TTC_5_end_1	ENSG00000185920|ENST00000418258	153	-20.34	2	32	1402	1433	30	0.5	0.7	ENSG00000185920|ENST00000418258	mature-tRNA-Glu-TTC_5_end_1	0	26	32	26	32	4017	7mer-1a	x	7mer-1a	0		0	PTCH1	protein_coding
ENSG00000185920	mature-tRNA-Glu-TTC_5_end_2	ENSG00000185920|ENST00000418258	154	-22.2	2	33	1401	1433	31	0.4839	0.7097	ENSG00000185920|ENST00000418258	mature-tRNA-Glu-TTC_5_end_2	0	26	32	26	32	4018	7mer-1a	x	7mer-1a	0		0	PTCH1	protein_coding
ENSG00000188033	mature-tRNA-Glu-CTC_5_end_1	ENSG00000188033|ENST00000414906	155	-24.67	2	29	235	261	27	0.6296	0.7037	ENSG00000188033|ENST00000414906	mature-tRNA-Glu-CTC_5_end_1	0	18	24	18	24	4103	7mer-1a	x	7mer-1a	0		0	ZNF490	protein_coding
ENSG00000188033	mature-tRNA-Glu-CTC_5_end_2	ENSG00000188033|ENST00000414906	156	-24.67	2	30	234	261	28	0.6071	0.7143	ENSG00000188033|ENST00000414906	mature-tRNA-Glu-CTC_5_end_2	0	18	24	18	24	4104	7mer-1a	x	7mer-1a	0		0	ZNF490	protein_coding
ENSG00000188033	mature-tRNA-Glu-CTC_5_end_3	ENSG00000188033|ENST00000414906	156	-24.67	2	30	233	261	28	0.6071	0.7143	ENSG00000188033|ENST00000414906	mature-tRNA-Glu-CTC_5_end_3	0	18	24	18	24	4105	7mer-1a	x	7mer-1a	0		0	ZNF490	protein_coding
ENSG00000147642	mature-tRNA-Glu-TTC_5_end_1	ENSG00000147642|ENST00000424158	155	-29.07	2	28	13	43	26	0.6154	0.7308	ENSG00000147642|ENST00000424158	mature-tRNA-Glu-TTC_5_end_1	0	46	52	46	52	4188	7mer-m8	x	7mer-m8	0		0	SYBU	protein_coding
ENSG00000147642	mature-tRNA-Glu-TTC_5_end_2	ENSG00000147642|ENST00000424158	157	-29.07	2	33	14	43	31	0.6129	0.7097	ENSG00000147642|ENST00000424158	mature-tRNA-Glu-TTC_5_end_2	0	46	52	46	52	4189	7mer-m8	x	7mer-m8	0		0	SYBU	protein_coding
ENSG00000088543	mature-tRNA-Glu-CTC_5_end_1	ENSG00000088543|ENST00000426034	155	-33.72	2	32	1222	1252	30	0.5667	0.7	ENSG00000088543|ENST00000426034	mature-tRNA-Glu-CTC_5_end_1	0	27	32	27	32	4198	6mer	x	6mer	0		0	C3orf18	protein_coding
ENSG00000088543	mature-tRNA-Glu-CTC_5_end_2	ENSG00000088543|ENST00000426034	149	-27.51	2	30	1224	1252	28	0.5357	0.7143	ENSG00000088543|ENST00000426034	mature-tRNA-Glu-CTC_5_end_2	0	27	32	27	32	4199	6mer	x	6mer	0		0	C3orf18	protein_coding
ENSG00000088543	mature-tRNA-Glu-CTC_5_end_3	ENSG00000088543|ENST00000426034	149	-29.36	2	30	1223	1252	28	0.5357	0.7143	ENSG00000088543|ENST00000426034	mature-tRNA-Glu-CTC_5_end_3	0	27	32	27	32	4200	6mer	x	6mer	0		0	C3orf18	protein_coding
ENSG00000198740	mature-tRNA-Glu-CTC_5_end_1	ENSG00000198740|ENST00000430262	145	-24.16	2	23	178	204	21	0.6667	0.7143	ENSG00000198740|ENST00000430262	mature-tRNA-Glu-CTC_5_end_1	0	23	28	23	28	4206	6mer	x	6mer	0		0	ZNF652	protein_coding
ENSG00000198740	mature-tRNA-Glu-CTC_5_end_2	ENSG00000198740|ENST00000430262	145	-24.65	2	23	177	204	21	0.6667	0.7143	ENSG00000198740|ENST00000430262	mature-tRNA-Glu-CTC_5_end_2	0	23	28	23	28	4207	6mer	x	6mer	0		0	ZNF652	protein_coding
ENSG00000198740	mature-tRNA-Glu-CTC_5_end_3	ENSG00000198740|ENST00000430262	145	-24.65	2	23	176	204	21	0.6667	0.7143	ENSG00000198740|ENST00000430262	mature-tRNA-Glu-CTC_5_end_3	0	23	28	23	28	4208	6mer	x	6mer	0		0	ZNF652	protein_coding
ENSG00000115875	mature-tRNA-Glu-TTC_5_end_1	ENSG00000115875|ENST00000425778	155	-21.33	2	26	922	953	24	0.625	0.7083	ENSG00000115875|ENST00000425778	mature-tRNA-Glu-TTC_5_end_1	0	16	21	16	21	4241	6mer	x	6mer	0		0	SRSF7	protein_coding
ENSG00000115875	mature-tRNA-Glu-TTC_5_end_2	ENSG00000115875|ENST00000425778	155	-21.5	2	26	921	953	24	0.625	0.7083	ENSG00000115875|ENST00000425778	mature-tRNA-Glu-TTC_5_end_2	0	16	21	16	21	4242	6mer	x	6mer	0		0	SRSF7	protein_coding
ENSG00000198242	mature-tRNA-Gly-GCC_5_end_1	ENSG00000198242|ENST00000422514	157	-23.31	2	29	292	321	27	0.5926	0.7037	ENSG00000198242|ENST00000422514	mature-tRNA-Gly-GCC_5_end_1	0	44	50	44	50	4243	7mer-1a	x	7mer-1a	0		0	RPL23A	protein_coding
ENSG00000198242	mature-tRNA-Gly-GCC_5_end_2	ENSG00000198242|ENST00000422514	157	-24.08	2	29	291	321	27	0.5926	0.7037	ENSG00000198242|ENST00000422514	mature-tRNA-Gly-GCC_5_end_2	0	44	50	44	50	4244	7mer-1a	x	7mer-1a	0		0	RPL23A	protein_coding
ENSG00000198242	mature-tRNA-Gly-GCC_5_end_3	ENSG00000198242|ENST00000422514	157	-24.35	2	29	290	321	27	0.5926	0.7037	ENSG00000198242|ENST00000422514	mature-tRNA-Gly-GCC_5_end_3	0	44	50	44	50	4245	7mer-1a	x	7mer-1a	0		0	RPL23A	protein_coding
ENSG00000172113	mature-tRNA-Glu-CTC_5_end_1	ENSG00000172113|ENST00000426689	159	-26.23	2	29	47	79	30	0.5667	0.7	ENSG00000172113|ENST00000426689	mature-tRNA-Glu-CTC_5_end_1	0	45	50	45	50	4267	6mer	x	6mer	0		0	NME6	protein_coding
ENSG00000172113	mature-tRNA-Glu-CTC_5_end_2	ENSG00000172113|ENST00000426689	160	-26.23	2	30	46	79	31	0.5484	0.7097	ENSG00000172113|ENST00000426689	mature-tRNA-Glu-CTC_5_end_2	0	45	50	45	50	4268	6mer	x	6mer	0		0	NME6	protein_coding
ENSG00000172113	mature-tRNA-Glu-CTC_5_end_3	ENSG00000172113|ENST00000426689	160	-26.86	2	30	45	79	31	0.5484	0.7097	ENSG00000172113|ENST00000426689	mature-tRNA-Glu-CTC_5_end_3	0	45	50	45	50	4269	6mer	x	6mer	0		0	NME6	protein_coding
ENSG00000112511	mature-tRNA-Glu-CTC_5_end_1	ENSG00000112511|ENST00000427826	150	-21.9	2	16	1	16	15	0.7333	0.8667	ENSG00000112511|ENST00000427826	mature-tRNA-Glu-CTC_5_end_1	0	37	42	37	42	4328	6mer	x	6mer	0		0	PHF1	protein_coding
ENSG00000112511	mature-tRNA-Glu-CTC_5_end_2	ENSG00000112511|ENST00000427826	150	-19.94	2	16	1	16	15	0.7333	0.8667	ENSG00000112511|ENST00000427826	mature-tRNA-Glu-CTC_5_end_2	0	37	42	37	42	4329	6mer	x	6mer	0		0	PHF1	protein_coding
ENSG00000112511	mature-tRNA-Glu-CTC_5_end_3	ENSG00000112511|ENST00000427826	150	-19.94	2	16	1	16	15	0.7333	0.8667	ENSG00000112511|ENST00000427826	mature-tRNA-Glu-CTC_5_end_3	0	37	42	37	42	4330	6mer	x	6mer	0		0	PHF1	protein_coding
ENSG00000142192	mature-tRNA-Glu-TTC_5_end_1	ENSG00000142192|ENST00000439274	162	-28.14	2	32	52	85	33	0.6061	0.7273	ENSG00000142192|ENST00000439274	mature-tRNA-Glu-TTC_5_end_1	0	21	26	21	26	4451	6mer	x	6mer	0		0	APP	protein_coding
ENSG00000142192	mature-tRNA-Glu-TTC_5_end_2	ENSG00000142192|ENST00000439274	162	-28.14	2	32	51	85	33	0.6061	0.7273	ENSG00000142192|ENST00000439274	mature-tRNA-Glu-TTC_5_end_2	0	21	26	21	26	4452	6mer	x	6mer	0		0	APP	protein_coding
ENSG00000211456	mature-tRNA-Gly-GCC_5_end_1	ENSG00000211456|ENST00000441228	156	-17.36	2	31	820	849	30	0.6333	0.7	ENSG00000211456|ENST00000441228	mature-tRNA-Gly-GCC_5_end_1	0	41	47	41	47	4473	7mer-m8	x	7mer-m8	0		0	SACM1L	protein_coding
ENSG00000211456	mature-tRNA-Gly-GCC_5_end_2	ENSG00000211456|ENST00000441228	156	-17.36	2	31	819	849	30	0.6333	0.7	ENSG00000211456|ENST00000441228	mature-tRNA-Gly-GCC_5_end_2	0	41	47	41	47	4474	7mer-m8	x	7mer-m8	0		0	SACM1L	protein_coding
ENSG00000211456	mature-tRNA-Gly-GCC_5_end_3	ENSG00000211456|ENST00000441228	156	-17.36	2	31	818	849	30	0.6333	0.7	ENSG00000211456|ENST00000441228	mature-tRNA-Gly-GCC_5_end_3	0	41	47	41	47	4475	7mer-m8	x	7mer-m8	0		0	SACM1L	protein_coding
ENSG00000138434	mature-tRNA-Glu-TTC_5_end_1	ENSG00000138434|ENST00000440623	162	-26.76	2	30	1445	1478	30	0.6	0.7333	ENSG00000138434|ENST00000440623	mature-tRNA-Glu-TTC_5_end_1	0	31	36	31	36	4530	6mer	x	6mer	0		0	ITPRID2	protein_coding
ENSG00000138434	mature-tRNA-Glu-TTC_5_end_2	ENSG00000138434|ENST00000440623	164	-27.39	2	33	1443	1478	34	0.5882	0.7353	ENSG00000138434|ENST00000440623	mature-tRNA-Glu-TTC_5_end_2	0	31	36	31	36	4531	6mer	x	6mer	0		0	ITPRID2	protein_coding
ENSG00000164659	mature-tRNA-Gly-GCC_5_end_1	ENSG00000164659|ENST00000444627	157	-24.63	2	27	263	295	26	0.6154	0.6923	ENSG00000164659|ENST00000444627	mature-tRNA-Gly-GCC_5_end_1	0	49	54	49	54	4532	6mer	x	6mer	0		0	ELAPOR2	protein_coding
ENSG00000164659	mature-tRNA-Gly-GCC_5_end_2	ENSG00000164659|ENST00000444627	157	-24.63	2	27	262	295	26	0.6154	0.6923	ENSG00000164659|ENST00000444627	mature-tRNA-Gly-GCC_5_end_2	0	49	54	49	54	4533	6mer	x	6mer	0		0	ELAPOR2	protein_coding
ENSG00000164659	mature-tRNA-Gly-GCC_5_end_3	ENSG00000164659|ENST00000444627	157	-24.63	2	27	261	295	26	0.6154	0.6923	ENSG00000164659|ENST00000444627	mature-tRNA-Gly-GCC_5_end_3	0	49	54	49	54	4534	6mer	x	6mer	0		0	ELAPOR2	protein_coding
ENSG00000141956	mature-tRNA-Glu-CTC_5_end_1	ENSG00000141956|ENST00000441787	165	-27.99	2	28	3792	3824	29	0.6552	0.7241	ENSG00000141956|ENST00000441787	mature-tRNA-Glu-CTC_5_end_1	0	27	33	27	33	4559	7mer-m8	x	7mer-m8	0		0	PRDM15	protein_coding
ENSG00000141956	mature-tRNA-Glu-CTC_5_end_2	ENSG00000141956|ENST00000441787	165	-30.31	2	28	3791	3824	29	0.6552	0.7241	ENSG00000141956|ENST00000441787	mature-tRNA-Glu-CTC_5_end_2	0	27	33	27	33	4560	7mer-m8	x	7mer-m8	0		0	PRDM15	protein_coding
ENSG00000141956	mature-tRNA-Glu-CTC_5_end_3	ENSG00000141956|ENST00000441787	165	-31.65	2	28	3790	3824	29	0.6552	0.7241	ENSG00000141956|ENST00000441787	mature-tRNA-Glu-CTC_5_end_3	0	27	33	27	33	4561	7mer-m8	x	7mer-m8	0		0	PRDM15	protein_coding
ENSG00000094631	mature-tRNA-Glu-CTC_5_end_1	ENSG00000094631|ENST00000441703	170	-35.6	2	28	23	54	27	0.7037	0.8148	ENSG00000094631|ENST00000441703	mature-tRNA-Glu-CTC_5_end_1	0	47	53	47	53	4562	7mer-m8	x	7mer-m8	0		0	HDAC6	protein_coding
ENSG00000094631	mature-tRNA-Glu-CTC_5_end_2	ENSG00000094631|ENST00000441703	170	-34.87	2	28	25	54	27	0.7037	0.8148	ENSG00000094631|ENST00000441703	mature-tRNA-Glu-CTC_5_end_2	0	47	53	47	53	4563	7mer-m8	x	7mer-m8	0		0	HDAC6	protein_coding
ENSG00000094631	mature-tRNA-Glu-CTC_5_end_3	ENSG00000094631|ENST00000441703	170	-35.23	2	28	24	54	27	0.7037	0.8148	ENSG00000094631|ENST00000441703	mature-tRNA-Glu-CTC_5_end_3	0	47	53	47	53	4564	7mer-m8	x	7mer-m8	0		0	HDAC6	protein_coding
ENSG00000074047	mature-tRNA-Asp-GTC_CCA_end_1	ENSG00000074047|ENST00000445186	165	-43.08	2	37	611	648	36	0.5833	0.6667	ENSG00000074047|ENST00000445186	mature-tRNA-Asp-GTC_CCA_end_1	0	22	27	22	27	4610	6mer	x	6mer	0		0	GLI2	protein_coding
ENSG00000184182	mature-tRNA-Glu-CTC_5_end_1	ENSG00000184182|ENST00000439338	161	-31.35	2	27	137	171	27	0.5926	0.7407	ENSG00000184182|ENST00000439338	mature-tRNA-Glu-CTC_5_end_1	0	23	28	23	28	4621	6mer	x	6mer	0		0	UBE2F	protein_coding
ENSG00000184182	mature-tRNA-Glu-CTC_5_end_2	ENSG00000184182|ENST00000439338	157	-29.04	2	27	139	171	27	0.5556	0.7407	ENSG00000184182|ENST00000439338	mature-tRNA-Glu-CTC_5_end_2	0	23	28	23	28	4622	6mer	x	6mer	0		0	UBE2F	protein_coding
ENSG00000184182	mature-tRNA-Glu-CTC_5_end_3	ENSG00000184182|ENST00000439338	157	-29.04	2	27	138	171	27	0.5556	0.7407	ENSG00000184182|ENST00000439338	mature-tRNA-Glu-CTC_5_end_3	0	23	28	23	28	4623	6mer	x	6mer	0		0	UBE2F	protein_coding
ENSG00000092068	mature-tRNA-Glu-CTC_5_end_1	ENSG00000092068|ENST00000453702	163	-31.37	2	30	442	471	29	0.6552	0.7241	ENSG00000092068|ENST00000453702	mature-tRNA-Glu-CTC_5_end_1	0	27	33	27	33	4675	7mer-m8	x	7mer-m8	0		0	SLC7A8	protein_coding
ENSG00000092068	mature-tRNA-Glu-CTC_5_end_2	ENSG00000092068|ENST00000453702	161	-30.79	2	27	438	471	28	0.6071	0.7143	ENSG00000092068|ENST00000453702	mature-tRNA-Glu-CTC_5_end_2	0	27	33	27	33	4676	7mer-m8	x	7mer-m8	0		0	SLC7A8	protein_coding
ENSG00000092068	mature-tRNA-Glu-CTC_5_end_3	ENSG00000092068|ENST00000453702	161	-32.25	2	27	437	471	28	0.6071	0.7143	ENSG00000092068|ENST00000453702	mature-tRNA-Glu-CTC_5_end_3	0	27	33	27	33	4677	7mer-m8	x	7mer-m8	0		0	SLC7A8	protein_coding
ENSG00000092203	mature-tRNA-Glu-CTC_5_end_1	ENSG00000092203|ENST00000448790	170	-29.05	2	22	2107	2139	21	0.8095	0.8571	ENSG00000092203|ENST00000448790	mature-tRNA-Glu-CTC_5_end_1	0	23	29	23	29	4762	7mer-1a	x	7mer-1a	0		0	TOX4	protein_coding
ENSG00000092203	mature-tRNA-Glu-CTC_5_end_2	ENSG00000092203|ENST00000448790	170	-28.68	2	22	2109	2139	21	0.8095	0.8571	ENSG00000092203|ENST00000448790	mature-tRNA-Glu-CTC_5_end_2	0	23	29	23	29	4763	7mer-1a	x	7mer-1a	0		0	TOX4	protein_coding
ENSG00000092203	mature-tRNA-Glu-CTC_5_end_3	ENSG00000092203|ENST00000448790	170	-28.68	2	22	2108	2139	21	0.8095	0.8571	ENSG00000092203|ENST00000448790	mature-tRNA-Glu-CTC_5_end_3	0	23	29	23	29	4764	7mer-1a	x	7mer-1a	0		0	TOX4	protein_coding
ENSG00000186472	mature-tRNA-Glu-CTC_5_end_1	ENSG00000186472|ENST00000456006	160	-35.2	2	30	2	36	30	0.5	0.7667	ENSG00000186472|ENST00000456006	mature-tRNA-Glu-CTC_5_end_1	0	50	56	50	56	4772	7mer-m8	x	7mer-m8	0		0	PCLO	protein_coding
ENSG00000186472	mature-tRNA-Glu-CTC_5_end_2	ENSG00000186472|ENST00000456006	159	-35.61	2	30	4	36	30	0.5333	0.7667	ENSG00000186472|ENST00000456006	mature-tRNA-Glu-CTC_5_end_2	0	50	56	50	56	4773	7mer-m8	x	7mer-m8	0		0	PCLO	protein_coding
ENSG00000186472	mature-tRNA-Glu-CTC_5_end_3	ENSG00000186472|ENST00000456006	159	-35.61	2	30	3	36	30	0.5333	0.7667	ENSG00000186472|ENST00000456006	mature-tRNA-Glu-CTC_5_end_3	0	50	56	50	56	4774	7mer-m8	x	7mer-m8	0		0	PCLO	protein_coding
ENSG00000164659	mature-tRNA-Gly-GCC_5_end_1	ENSG00000164659|ENST00000450689	157	-24.63	2	27	263	295	26	0.6154	0.6923	ENSG00000164659|ENST00000450689	mature-tRNA-Gly-GCC_5_end_1	0	19	24	19	24	4817	6mer	x	6mer	0		0	ELAPOR2	protein_coding
ENSG00000164659	mature-tRNA-Gly-GCC_5_end_2	ENSG00000164659|ENST00000450689	157	-24.63	2	27	262	295	26	0.6154	0.6923	ENSG00000164659|ENST00000450689	mature-tRNA-Gly-GCC_5_end_2	0	19	24	19	24	4818	6mer	x	6mer	0		0	ELAPOR2	protein_coding
ENSG00000164659	mature-tRNA-Gly-GCC_5_end_3	ENSG00000164659|ENST00000450689	157	-24.63	2	27	261	295	26	0.6154	0.6923	ENSG00000164659|ENST00000450689	mature-tRNA-Gly-GCC_5_end_3	0	19	24	19	24	4819	6mer	x	6mer	0		0	ELAPOR2	protein_coding
ENSG00000074416	mature-tRNA-Glu-CTC_5_end_1	ENSG00000074416|ENST00000453507	174	-37.54	2	31	1010	1040	29	0.6897	0.7586	ENSG00000074416|ENST00000453507	mature-tRNA-Glu-CTC_5_end_1	0	30	36	30	36	4921	7mer-m8	x	7mer-m8	0		0	MGLL	protein_coding
ENSG00000074416	mature-tRNA-Glu-CTC_5_end_2	ENSG00000074416|ENST00000453507	169	-36.3	2	30	1012	1040	28	0.6786	0.75	ENSG00000074416|ENST00000453507	mature-tRNA-Glu-CTC_5_end_2	0	30	36	30	36	4922	7mer-m8	x	7mer-m8	0		0	MGLL	protein_coding
ENSG00000074416	mature-tRNA-Glu-CTC_5_end_3	ENSG00000074416|ENST00000453507	174	-36.3	2	31	1011	1040	29	0.6897	0.7586	ENSG00000074416|ENST00000453507	mature-tRNA-Glu-CTC_5_end_3	0	30	36	30	36	4923	7mer-m8	x	7mer-m8	0		0	MGLL	protein_coding
ENSG00000198563	mature-tRNA-Glu-CTC_5_end_1	ENSG00000198563|ENST00000458640	165	-35.63	2	32	25	56	30	0.6	0.7	ENSG00000198563|ENST00000458640	mature-tRNA-Glu-CTC_5_end_1	0	39	44	39	44	5009	6mer	x	6mer	0		0	DDX39B	protein_coding
ENSG00000198563	mature-tRNA-Glu-CTC_5_end_2	ENSG00000198563|ENST00000458640	157	-35.63	2	26	26	56	24	0.5833	0.7083	ENSG00000198563|ENST00000458640	mature-tRNA-Glu-CTC_5_end_2	0	39	44	39	44	5010	6mer	x	6mer	0		0	DDX39B	protein_coding
ENSG00000198563	mature-tRNA-Glu-CTC_5_end_3	ENSG00000198563|ENST00000458640	157	-36.81	2	26	25	56	24	0.5833	0.7083	ENSG00000198563|ENST00000458640	mature-tRNA-Glu-CTC_5_end_3	0	39	44	39	44	5011	6mer	x	6mer	0		0	DDX39B	protein_coding
ENSG00000162772	mature-tRNA-Glu-CTC_5_end_1	ENSG00000162772|ENST00000464547	163	-36.29	2	31	37	64	29	0.6207	0.7586	ENSG00000162772|ENST00000464547	mature-tRNA-Glu-CTC_5_end_1	0	19	25	19	25	5036	7mer-m8	x	7mer-m8	0		0	ATF3	protein_coding
ENSG00000162772	mature-tRNA-Glu-CTC_5_end_2	ENSG00000162772|ENST00000464547	157	-33.78	2	27	33	64	26	0.5769	0.7308	ENSG00000162772|ENST00000464547	mature-tRNA-Glu-CTC_5_end_2	0	19	25	19	25	5037	7mer-m8	x	7mer-m8	0		0	ATF3	protein_coding
ENSG00000162772	mature-tRNA-Glu-CTC_5_end_3	ENSG00000162772|ENST00000464547	160	-35.67	2	31	31	64	31	0.5806	0.7097	ENSG00000162772|ENST00000464547	mature-tRNA-Glu-CTC_5_end_3	0	19	25	19	25	5038	7mer-m8	x	7mer-m8	0		0	ATF3	protein_coding
ENSG00000144591	mature-tRNA-Glu-CTC_5_end_1	ENSG00000144591|ENST00000480034	153	-34.51	2	29	95	127	28	0.5714	0.7143	ENSG00000144591|ENST00000480034	mature-tRNA-Glu-CTC_5_end_1	0	43	48	43	48	5168	6mer	x	6mer	0		0	GMPPA	protein_coding
ENSG00000144591	mature-tRNA-Glu-CTC_5_end_2	ENSG00000144591|ENST00000480034	149	-30.96	2	29	97	127	28	0.5357	0.7143	ENSG00000144591|ENST00000480034	mature-tRNA-Glu-CTC_5_end_2	0	43	48	43	48	5169	6mer	x	6mer	0		0	GMPPA	protein_coding
ENSG00000144591	mature-tRNA-Glu-CTC_5_end_3	ENSG00000144591|ENST00000480034	149	-32.77	2	29	96	127	28	0.5357	0.7143	ENSG00000144591|ENST00000480034	mature-tRNA-Glu-CTC_5_end_3	0	43	48	43	48	5170	6mer	x	6mer	0		0	GMPPA	protein_coding
ENSG00000258472	mature-tRNA-Glu-TTC_5_end_1	ENSG00000258472|ENST00000481916	155	-28.36	2	32	578	608	30	0.6	0.6667	ENSG00000258472|ENST00000481916	mature-tRNA-Glu-TTC_5_end_1	0	31	37	31	37	5209	7mer-1a	x	7mer-1a	0		0	AC005726.1	protein_coding
ENSG00000258472	mature-tRNA-Glu-TTC_5_end_2	ENSG00000258472|ENST00000481916	156	-28.36	2	33	577	608	31	0.5806	0.6774	ENSG00000258472|ENST00000481916	mature-tRNA-Glu-TTC_5_end_2	0	31	37	31	37	5210	7mer-1a	x	7mer-1a	0		0	AC005726.1	protein_coding
ENSG00000151136	mature-tRNA-Glu-TTC_5_end_1	ENSG00000151136|ENST00000490090	164	-21.72	2	32	1160	1190	30	0.5	0.8	ENSG00000151136|ENST00000490090	mature-tRNA-Glu-TTC_5_end_1	0	52	57	52	57	5359	6mer	x	6mer	0		0	BTBD11	protein_coding
ENSG00000151136	mature-tRNA-Glu-TTC_5_end_2	ENSG00000151136|ENST00000490090	164	-23.38	2	32	1159	1190	30	0.5	0.8	ENSG00000151136|ENST00000490090	mature-tRNA-Glu-TTC_5_end_2	0	52	57	52	57	5360	6mer	x	6mer	0		0	BTBD11	protein_coding
ENSG00000131697	mature-tRNA-Glu-TTC_5_end_1	ENSG00000131697|ENST00000489180	162	-29.13	2	28	1336	1372	30	0.6	0.7	ENSG00000131697|ENST00000489180	mature-tRNA-Glu-TTC_5_end_1	0	15	20	15	20	5384	6mer	x	6mer	0		0	NPHP4	protein_coding
ENSG00000131697	mature-tRNA-Glu-TTC_5_end_2	ENSG00000131697|ENST00000489180	165	-29.3	2	33	1336	1372	35	0.6	0.6857	ENSG00000131697|ENST00000489180	mature-tRNA-Glu-TTC_5_end_2	0	15	20	15	20	5385	6mer	x	6mer	0		0	NPHP4	protein_coding
ENSG00000117597	mature-tRNA-Glu-TTC_5_end_1	ENSG00000117597|ENST00000491415	151	-27.08	2	30	3850	3880	29	0.6552	0.6552	ENSG00000117597|ENST00000491415	mature-tRNA-Glu-TTC_5_end_1	0	33	40	33	40	5461	8mer-1a	x	8mer-1a	0		0	UTP25	protein_coding
ENSG00000117597	mature-tRNA-Glu-TTC_5_end_2	ENSG00000117597|ENST00000491415	151	-27.08	2	30	3849	3880	29	0.6552	0.6552	ENSG00000117597|ENST00000491415	mature-tRNA-Glu-TTC_5_end_2	0	33	40	33	40	5462	8mer-1a	x	8mer-1a	0		0	UTP25	protein_coding
ENSG00000012048	mature-tRNA-Glu-CTC_5_end_1	ENSG00000012048|ENST00000492859	155	-25.93	2	29	550	577	28	0.6429	0.6786	ENSG00000012048|ENST00000492859	mature-tRNA-Glu-CTC_5_end_1	0	51	56	51	56	5481	6mer	x	6mer	0		0	BRCA1	protein_coding
ENSG00000012048	mature-tRNA-Glu-CTC_5_end_2	ENSG00000012048|ENST00000492859	155	-25.93	2	29	549	577	28	0.6429	0.6786	ENSG00000012048|ENST00000492859	mature-tRNA-Glu-CTC_5_end_2	0	51	56	51	56	5482	6mer	x	6mer	0		0	BRCA1	protein_coding
ENSG00000012048	mature-tRNA-Glu-CTC_5_end_3	ENSG00000012048|ENST00000492859	155	-25.93	2	29	548	577	28	0.6429	0.6786	ENSG00000012048|ENST00000492859	mature-tRNA-Glu-CTC_5_end_3	0	51	56	51	56	5483	6mer	x	6mer	0		0	BRCA1	protein_coding
ENSG00000100483	mature-tRNA-Glu-CTC_5_end_1	ENSG00000100483|ENST00000491402	179	-38.59	2	30	366	397	28	0.6786	0.7857	ENSG00000100483|ENST00000491402	mature-tRNA-Glu-CTC_5_end_1	0	55	60	55	60	5512	6mer	x	6mer	0		0	VCPKMT	protein_coding
ENSG00000100483	mature-tRNA-Glu-CTC_5_end_2	ENSG00000100483|ENST00000491402	175	-35.99	2	30	368	397	28	0.6429	0.7857	ENSG00000100483|ENST00000491402	mature-tRNA-Glu-CTC_5_end_2	0	55	60	55	60	5513	6mer	x	6mer	0		0	VCPKMT	protein_coding
ENSG00000100483	mature-tRNA-Glu-CTC_5_end_3	ENSG00000100483|ENST00000491402	175	-35.99	2	30	367	397	28	0.6429	0.7857	ENSG00000100483|ENST00000491402	mature-tRNA-Glu-CTC_5_end_3	0	55	60	55	60	5514	6mer	x	6mer	0		0	VCPKMT	protein_coding
ENSG00000177646	mature-tRNA-Gly-GCC_5_end_1	ENSG00000177646|ENST00000505192	146	-22.01	2	27	951	985	30	0.6333	0.6667	ENSG00000177646|ENST00000505192	mature-tRNA-Gly-GCC_5_end_1	0	54	59	54	59	5526	6mer	x	6mer	0		0	ACAD9	protein_coding
ENSG00000177646	mature-tRNA-Gly-GCC_5_end_2	ENSG00000177646|ENST00000505192	146	-22.01	2	27	948	985	30	0.6333	0.6667	ENSG00000177646|ENST00000505192	mature-tRNA-Gly-GCC_5_end_2	0	54	59	54	59	5527	6mer	x	6mer	0		0	ACAD9	protein_coding
ENSG00000177646	mature-tRNA-Gly-GCC_5_end_3	ENSG00000177646|ENST00000505192	146	-22.04	2	27	947	985	30	0.6333	0.6667	ENSG00000177646|ENST00000505192	mature-tRNA-Gly-GCC_5_end_3	0	54	59	54	59	5528	6mer	x	6mer	0		0	ACAD9	protein_coding
ENSG00000188921	mature-tRNA-Glu-TTC_5_end_1	ENSG00000188921|ENST00000495827	163	-25.19	2	27	995	1033	31	0.6452	0.7419	ENSG00000188921|ENST00000495827	mature-tRNA-Glu-TTC_5_end_1	0	45	51	45	51	5579	7mer-1a	x	7mer-1a	0		0	HACD4	protein_coding
ENSG00000188921	mature-tRNA-Glu-TTC_5_end_2	ENSG00000188921|ENST00000495827	163	-25.19	2	27	994	1033	31	0.6452	0.7419	ENSG00000188921|ENST00000495827	mature-tRNA-Glu-TTC_5_end_2	0	45	51	45	51	5580	7mer-1a	x	7mer-1a	0		0	HACD4	protein_coding
ENSG00000204136	mature-tRNA-Glu-TTC_5_end_1	ENSG00000204136|ENST00000495328	170	-26.05	2	32	1847	1876	30	0.6	0.8	ENSG00000204136|ENST00000495328	mature-tRNA-Glu-TTC_5_end_1	0	27	34	27	34	5608	8mer-1a	x	8mer-1a	0		0	GGTA1	protein_coding
ENSG00000204136	mature-tRNA-Glu-TTC_5_end_2	ENSG00000204136|ENST00000495328	171	-26.05	2	33	1846	1876	31	0.5806	0.8065	ENSG00000204136|ENST00000495328	mature-tRNA-Glu-TTC_5_end_2	0	27	34	27	34	5609	8mer-1a	x	8mer-1a	0		0	GGTA1	protein_coding
ENSG00000204427	mature-tRNA-Glu-CTC_5_end_1	ENSG00000204427|ENST00000495769	159	-33.79	2	32	966	995	31	0.6129	0.7742	ENSG00000204427|ENST00000495769	mature-tRNA-Glu-CTC_5_end_1	0	30	36	30	36	5623	7mer-1a	x	7mer-1a	0		0	ABHD16A	protein_coding
ENSG00000204427	mature-tRNA-Glu-CTC_5_end_2	ENSG00000204427|ENST00000495769	154	-30.3	2	29	967	995	28	0.5714	0.7857	ENSG00000204427|ENST00000495769	mature-tRNA-Glu-CTC_5_end_2	0	30	36	30	36	5624	7mer-1a	x	7mer-1a	0		0	ABHD16A	protein_coding
ENSG00000204427	mature-tRNA-Glu-CTC_5_end_3	ENSG00000204427|ENST00000495769	154	-30.57	2	29	966	995	28	0.5714	0.7857	ENSG00000204427|ENST00000495769	mature-tRNA-Glu-CTC_5_end_3	0	30	36	30	36	5625	7mer-1a	x	7mer-1a	0		0	ABHD16A	protein_coding
ENSG00000177646	mature-tRNA-Gly-GCC_5_end_1	ENSG00000177646|ENST00000505867	146	-22.01	2	27	1055	1089	30	0.6333	0.6667	ENSG00000177646|ENST00000505867	mature-tRNA-Gly-GCC_5_end_1	0	54	60	54	60	5707	7mer-1a	x	7mer-1a	0		0	ACAD9	protein_coding
ENSG00000177646	mature-tRNA-Gly-GCC_5_end_2	ENSG00000177646|ENST00000505867	146	-22.01	2	27	1052	1089	30	0.6333	0.6667	ENSG00000177646|ENST00000505867	mature-tRNA-Gly-GCC_5_end_2	0	54	60	54	60	5708	7mer-1a	x	7mer-1a	0		0	ACAD9	protein_coding
ENSG00000177646	mature-tRNA-Gly-GCC_5_end_3	ENSG00000177646|ENST00000505867	146	-22.04	2	27	1051	1089	30	0.6333	0.6667	ENSG00000177646|ENST00000505867	mature-tRNA-Gly-GCC_5_end_3	0	54	60	54	60	5709	7mer-1a	x	7mer-1a	0		0	ACAD9	protein_coding
ENSG00000062194	mature-tRNA-Glu-CTC_5_end_1	ENSG00000062194|ENST00000506184	145	-23.52	2	31	675	708	30	0.4333	0.7	ENSG00000062194|ENST00000506184	mature-tRNA-Glu-CTC_5_end_1	0	44	49	44	49	5737	6mer	x	6mer	0		0	GPBP1	protein_coding
ENSG00000062194	mature-tRNA-Glu-CTC_5_end_2	ENSG00000062194|ENST00000506184	140	-21.62	2	9	678	708	7	1	1	ENSG00000062194|ENST00000506184	mature-tRNA-Glu-CTC_5_end_2	0	44	49	44	49	5738	6mer	x	6mer	0		0	GPBP1	protein_coding
ENSG00000062194	mature-tRNA-Glu-CTC_5_end_3	ENSG00000062194|ENST00000506184	141	-21.86	2	31	676	708	30	0.4	0.7	ENSG00000062194|ENST00000506184	mature-tRNA-Glu-CTC_5_end_3	0	44	49	44	49	5739	6mer	x	6mer	0		0	GPBP1	protein_coding
ENSG00000124313	mature-tRNA-Glu-TTC_5_end_1	ENSG00000124313|ENST00000498281	173	-36.62	2	31	9	42	32	0.6875	0.75	ENSG00000124313|ENST00000498281	mature-tRNA-Glu-TTC_5_end_1	0	48	53	48	53	5812	6mer	x	6mer	0		0	IQSEC2	protein_coding
ENSG00000124313	mature-tRNA-Glu-TTC_5_end_2	ENSG00000124313|ENST00000498281	175	-37.26	2	33	8	42	34	0.6765	0.7353	ENSG00000124313|ENST00000498281	mature-tRNA-Glu-TTC_5_end_2	0	48	53	48	53	5813	6mer	x	6mer	0		0	IQSEC2	protein_coding
ENSG00000178852	mature-tRNA-Glu-CTC_5_end_1	ENSG00000178852|ENST00000517484	159	-25.7	2	27	336	363	25	0.6	0.76	ENSG00000178852|ENST00000517484	mature-tRNA-Glu-CTC_5_end_1	0	55	60	55	60	5817	6mer	x	6mer	0		0	EFCAB13	protein_coding
ENSG00000178852	mature-tRNA-Glu-CTC_5_end_2	ENSG00000178852|ENST00000517484	159	-26.07	2	27	335	363	25	0.6	0.76	ENSG00000178852|ENST00000517484	mature-tRNA-Glu-CTC_5_end_2	0	55	60	55	60	5818	6mer	x	6mer	0		0	EFCAB13	protein_coding
ENSG00000178852	mature-tRNA-Glu-CTC_5_end_3	ENSG00000178852|ENST00000517484	159	-26.31	2	27	334	363	25	0.6	0.76	ENSG00000178852|ENST00000517484	mature-tRNA-Glu-CTC_5_end_3	0	55	60	55	60	5819	6mer	x	6mer	0		0	EFCAB13	protein_coding
ENSG00000184305	mature-tRNA-Glu-TTC_5_end_1	ENSG00000184305|ENST00000509176	160	-21.14	2	31	2462	2492	30	0.6333	0.7333	ENSG00000184305|ENST00000509176	mature-tRNA-Glu-TTC_5_end_1	0	33	40	33	40	5831	8mer-1a	x	8mer-1a	0		0	CCSER1	protein_coding
ENSG00000184305	mature-tRNA-Glu-TTC_5_end_2	ENSG00000184305|ENST00000509176	160	-21.31	2	31	2461	2492	30	0.6333	0.7333	ENSG00000184305|ENST00000509176	mature-tRNA-Glu-TTC_5_end_2	0	33	40	33	40	5832	8mer-1a	x	8mer-1a	0		0	CCSER1	protein_coding
ENSG00000113621	mature-tRNA-Gly-GCC_5_end_1	ENSG00000113621|ENST00000511070	163	-20.01	2	25	169	200	25	0.64	0.76	ENSG00000113621|ENST00000511070	mature-tRNA-Gly-GCC_5_end_1	0	33	38	33	38	6020	6mer	x	6mer	0		0	TXNDC15	protein_coding
ENSG00000113621	mature-tRNA-Gly-GCC_5_end_2	ENSG00000113621|ENST00000511070	163	-20.01	2	25	166	200	25	0.64	0.76	ENSG00000113621|ENST00000511070	mature-tRNA-Gly-GCC_5_end_2	0	33	38	33	38	6021	6mer	x	6mer	0		0	TXNDC15	protein_coding
ENSG00000113621	mature-tRNA-Gly-GCC_5_end_3	ENSG00000113621|ENST00000511070	163	-20.01	2	25	165	200	25	0.64	0.76	ENSG00000113621|ENST00000511070	mature-tRNA-Gly-GCC_5_end_3	0	33	38	33	38	6022	6mer	x	6mer	0		0	TXNDC15	protein_coding
ENSG00000198561	mature-tRNA-Glu-TTC_5_end_1	ENSG00000198561|ENST00000525902	147	-20.19	2	27	2116	2146	25	0.52	0.72	ENSG00000198561|ENST00000525902	mature-tRNA-Glu-TTC_5_end_1	0	27	33	27	33	6132	7mer-1a	x	7mer-1a	0		0	CTNND1	protein_coding
ENSG00000198561	mature-tRNA-Glu-TTC_5_end_2	ENSG00000198561|ENST00000525902	147	-20.36	2	27	2115	2146	25	0.52	0.72	ENSG00000198561|ENST00000525902	mature-tRNA-Glu-TTC_5_end_2	0	27	33	27	33	6133	7mer-1a	x	7mer-1a	0		0	CTNND1	protein_coding
ENSG00000147642	mature-tRNA-Glu-TTC_5_end_1	ENSG00000147642|ENST00000528647	155	-29.07	2	28	13	43	26	0.6154	0.7308	ENSG00000147642|ENST00000528647	mature-tRNA-Glu-TTC_5_end_1	0	24	30	24	30	6162	7mer-m8	x	7mer-m8	0		0	SYBU	protein_coding
ENSG00000147642	mature-tRNA-Glu-TTC_5_end_2	ENSG00000147642|ENST00000528647	157	-29.07	2	33	14	43	31	0.6129	0.7097	ENSG00000147642|ENST00000528647	mature-tRNA-Glu-TTC_5_end_2	0	24	30	24	30	6163	7mer-m8	x	7mer-m8	0		0	SYBU	protein_coding
ENSG00000173039	mature-tRNA-Glu-CTC_5_end_1	ENSG00000173039|ENST00000525693	179	-35.42	2	32	964	996	30	0.6	0.7667	ENSG00000173039|ENST00000525693	mature-tRNA-Glu-CTC_5_end_1	0	37	43	37	43	6164	7mer-m8	x	7mer-m8	0		0	RELA	protein_coding
ENSG00000173039	mature-tRNA-Glu-CTC_5_end_2	ENSG00000173039|ENST00000525693	173	-32.02	2	30	966	996	28	0.5714	0.7857	ENSG00000173039|ENST00000525693	mature-tRNA-Glu-CTC_5_end_2	0	37	43	37	43	6165	7mer-m8	x	7mer-m8	0		0	RELA	protein_coding
ENSG00000173039	mature-tRNA-Glu-CTC_5_end_3	ENSG00000173039|ENST00000525693	173	-32.54	2	30	965	996	28	0.5714	0.7857	ENSG00000173039|ENST00000525693	mature-tRNA-Glu-CTC_5_end_3	0	37	43	37	43	6166	7mer-m8	x	7mer-m8	0		0	RELA	protein_coding
ENSG00000166833	mature-tRNA-Glu-TTC_5_end_1	ENSG00000166833|ENST00000527559	174	-34.79	2	30	1104	1132	28	0.7143	0.8214	ENSG00000166833|ENST00000527559	mature-tRNA-Glu-TTC_5_end_1	0	23	30	23	30	6255	8mer-1a	x	8mer-1a	0		0	NAV2	protein_coding
ENSG00000166833	mature-tRNA-Glu-TTC_5_end_2	ENSG00000166833|ENST00000527559	177	-35.41	2	33	1103	1132	31	0.6774	0.8065	ENSG00000166833|ENST00000527559	mature-tRNA-Glu-TTC_5_end_2	0	23	30	23	30	6256	8mer-1a	x	8mer-1a	0		0	NAV2	protein_coding
ENSG00000184489	mature-tRNA-Glu-CTC_5_end_1	ENSG00000184489|ENST00000521578	159	-31.68	2	31	951	981	29	0.5517	0.7241	ENSG00000184489|ENST00000521578	mature-tRNA-Glu-CTC_5_end_1	0	18	23	18	23	6276	6mer	x	6mer	0		0	PTP4A3	protein_coding
ENSG00000184489	mature-tRNA-Glu-CTC_5_end_2	ENSG00000184489|ENST00000521578	151	-29.89	2	30	947	981	32	0.4688	0.75	ENSG00000184489|ENST00000521578	mature-tRNA-Glu-CTC_5_end_2	0	18	23	18	23	6277	6mer	x	6mer	0		0	PTP4A3	protein_coding
ENSG00000184489	mature-tRNA-Glu-CTC_5_end_3	ENSG00000184489|ENST00000521578	155	-29.45	2	31	952	981	29	0.5172	0.7241	ENSG00000184489|ENST00000521578	mature-tRNA-Glu-CTC_5_end_3	0	18	23	18	23	6278	6mer	x	6mer	0		0	PTP4A3	protein_coding
ENSG00000168487	mature-tRNA-Glu-CTC_5_end_1	ENSG00000168487|ENST00000520626	164	-32.02	2	32	4020	4057	35	0.6	0.7143	ENSG00000168487|ENST00000520626	mature-tRNA-Glu-CTC_5_end_1	0	16	21	16	21	6303	6mer	x	6mer	0		0	BMP1	protein_coding
ENSG00000168487	mature-tRNA-Glu-CTC_5_end_2	ENSG00000168487|ENST00000520626	159	-30.63	2	22	4025	4057	22	0.6818	0.8182	ENSG00000168487|ENST00000520626	mature-tRNA-Glu-CTC_5_end_2	0	16	21	16	21	6304	6mer	x	6mer	0		0	BMP1	protein_coding
ENSG00000168487	mature-tRNA-Glu-CTC_5_end_3	ENSG00000168487|ENST00000520626	160	-30.79	2	31	4027	4057	31	0.6129	0.7419	ENSG00000168487|ENST00000520626	mature-tRNA-Glu-CTC_5_end_3	0	16	21	16	21	6305	6mer	x	6mer	0		0	BMP1	protein_coding
ENSG00000162241	mature-tRNA-Glu-CTC_5_end_1	ENSG00000162241|ENST00000526898	159	-32.44	2	31	745	777	30	0.5667	0.7333	ENSG00000162241|ENST00000526898	mature-tRNA-Glu-CTC_5_end_1	0	46	51	46	51	6361	6mer	x	6mer	0		0	SLC25A45	protein_coding
ENSG00000162241	mature-tRNA-Glu-CTC_5_end_2	ENSG00000162241|ENST00000526898	153	-29.77	2	28	463	492	26	0.5769	0.6923	ENSG00000162241|ENST00000526898	mature-tRNA-Glu-CTC_5_end_2	0	46	51	46	51	6362	6mer	x	6mer	0		0	SLC25A45	protein_coding
ENSG00000162241	mature-tRNA-Glu-CTC_5_end_3	ENSG00000162241|ENST00000526898	155	-33.49	2	31	460	492	31	0.5806	0.6774	ENSG00000162241|ENST00000526898	mature-tRNA-Glu-CTC_5_end_3	0	46	51	46	51	6363	6mer	x	6mer	0		0	SLC25A45	protein_coding
ENSG00000102878	mature-tRNA-Glu-CTC_5_end_1	ENSG00000102878|ENST00000521314	171	-28.56	2	28	776	807	27	0.7407	0.7407	ENSG00000102878|ENST00000521314	mature-tRNA-Glu-CTC_5_end_1	0	47	53	47	53	6364	7mer-1a	x	7mer-1a	0		0	HSF4	protein_coding
ENSG00000102878	mature-tRNA-Glu-CTC_5_end_2	ENSG00000102878|ENST00000521314	167	-25.67	2	28	778	807	27	0.7037	0.7407	ENSG00000102878|ENST00000521314	mature-tRNA-Glu-CTC_5_end_2	0	47	53	47	53	6365	7mer-1a	x	7mer-1a	0		0	HSF4	protein_coding
ENSG00000102878	mature-tRNA-Glu-CTC_5_end_3	ENSG00000102878|ENST00000521314	167	-26.41	2	28	777	807	27	0.7037	0.7407	ENSG00000102878|ENST00000521314	mature-tRNA-Glu-CTC_5_end_3	0	47	53	47	53	6366	7mer-1a	x	7mer-1a	0		0	HSF4	protein_coding
ENSG00000164733	mature-tRNA-Glu-TTC_5_end_1	ENSG00000164733|ENST00000526195	168	-29.35	2	19	546	577	17	0.8235	0.9412	ENSG00000164733|ENST00000526195	mature-tRNA-Glu-TTC_5_end_1	0	54	59	54	59	6367	6mer	x	6mer	0		0	CTSB	protein_coding
ENSG00000164733	mature-tRNA-Glu-TTC_5_end_2	ENSG00000164733|ENST00000526195	168	-29.35	2	19	545	577	17	0.8235	0.9412	ENSG00000164733|ENST00000526195	mature-tRNA-Glu-TTC_5_end_2	0	54	59	54	59	6368	6mer	x	6mer	0		0	CTSB	protein_coding
ENSG00000148926	mature-tRNA-Glu-CTC_5_end_1	ENSG00000148926|ENST00000528655	171	-33.73	2	30	332	368	32	0.6562	0.7188	ENSG00000148926|ENST00000528655	mature-tRNA-Glu-CTC_5_end_1	0	25	30	25	30	6369	6mer	x	6mer	0		0	ADM	protein_coding
ENSG00000148926	mature-tRNA-Glu-CTC_5_end_2	ENSG00000148926|ENST00000528655	167	-31.56	2	30	334	368	32	0.625	0.7188	ENSG00000148926|ENST00000528655	mature-tRNA-Glu-CTC_5_end_2	0	25	30	25	30	6370	6mer	x	6mer	0		0	ADM	protein_coding
ENSG00000148926	mature-tRNA-Glu-CTC_5_end_3	ENSG00000148926|ENST00000528655	167	-31.56	2	30	333	368	32	0.625	0.7188	ENSG00000148926|ENST00000528655	mature-tRNA-Glu-CTC_5_end_3	0	25	30	25	30	6371	6mer	x	6mer	0		0	ADM	protein_coding
ENSG00000149115	mature-tRNA-Gly-GCC_5_end_1	ENSG00000149115|ENST00000528882	159	-20.64	2	31	3355	3382	29	0.6552	0.7241	ENSG00000149115|ENST00000528882	mature-tRNA-Gly-GCC_5_end_1	0	29	35	29	35	6397	7mer-1a	x	7mer-1a	0		0	TNKS1BP1	protein_coding
ENSG00000149115	mature-tRNA-Gly-GCC_5_end_2	ENSG00000149115|ENST00000528882	159	-23.46	2	31	3354	3382	29	0.6552	0.7241	ENSG00000149115|ENST00000528882	mature-tRNA-Gly-GCC_5_end_2	0	29	35	29	35	6398	7mer-1a	x	7mer-1a	0		0	TNKS1BP1	protein_coding
ENSG00000149115	mature-tRNA-Gly-GCC_5_end_3	ENSG00000149115|ENST00000528882	159	-23.73	2	31	3353	3382	29	0.6552	0.7241	ENSG00000149115|ENST00000528882	mature-tRNA-Gly-GCC_5_end_3	0	29	35	29	35	6399	7mer-1a	x	7mer-1a	0		0	TNKS1BP1	protein_coding
ENSG00000116299	mature-tRNA-Glu-TTC_5_end_1	ENSG00000116299|ENST00000527996	153	-29.56	2	24	1449	1487	28	0.6429	0.6786	ENSG00000116299|ENST00000527996	mature-tRNA-Glu-TTC_5_end_1	0	24	29	24	29	6400	6mer	x	6mer	0		0	ELAPOR1	protein_coding
ENSG00000116299	mature-tRNA-Glu-TTC_5_end_2	ENSG00000116299|ENST00000527996	154	-29.56	2	33	1448	1487	37	0.5405	0.6486	ENSG00000116299|ENST00000527996	mature-tRNA-Glu-TTC_5_end_2	0	24	29	24	29	6401	6mer	x	6mer	0		0	ELAPOR1	protein_coding
ENSG00000104408	mature-tRNA-Glu-CTC_5_end_1	ENSG00000104408|ENST00000522887	158	-22.75	2	21	269	300	19	0.7368	0.7895	ENSG00000104408|ENST00000522887	mature-tRNA-Glu-CTC_5_end_1	0	32	37	32	37	6409	6mer	x	6mer	0		0	EIF3E	protein_coding
ENSG00000104408	mature-tRNA-Glu-CTC_5_end_2	ENSG00000104408|ENST00000522887	154	-25.34	2	21	271	300	19	0.6842	0.7895	ENSG00000104408|ENST00000522887	mature-tRNA-Glu-CTC_5_end_2	0	32	37	32	37	6410	6mer	x	6mer	0		0	EIF3E	protein_coding
ENSG00000104408	mature-tRNA-Glu-CTC_5_end_3	ENSG00000104408|ENST00000522887	154	-26.23	2	21	270	300	19	0.6842	0.7895	ENSG00000104408|ENST00000522887	mature-tRNA-Glu-CTC_5_end_3	0	32	37	32	37	6411	6mer	x	6mer	0		0	EIF3E	protein_coding
ENSG00000198561	mature-tRNA-Glu-TTC_5_end_1	ENSG00000198561|ENST00000528621	147	-20.19	2	27	2116	2146	25	0.52	0.72	ENSG00000198561|ENST00000528621	mature-tRNA-Glu-TTC_5_end_1	0	40	45	40	45	6438	6mer	x	6mer	0		0	CTNND1	protein_coding
ENSG00000198561	mature-tRNA-Glu-TTC_5_end_2	ENSG00000198561|ENST00000528621	147	-20.36	2	27	2115	2146	25	0.52	0.72	ENSG00000198561|ENST00000528621	mature-tRNA-Glu-TTC_5_end_2	0	40	45	40	45	6439	6mer	x	6mer	0		0	CTNND1	protein_coding
ENSG00000133112	mature-tRNA-Glu-TTC_5_end_1	ENSG00000133112|ENST00000530705	143	-18.79	2	17	833	867	17	0.7059	0.7059	ENSG00000133112|ENST00000530705	mature-tRNA-Glu-TTC_5_end_1	0	45	50	45	50	6535	6mer	x	6mer	0		0	TPT1	protein_coding
ENSG00000133112	mature-tRNA-Glu-TTC_5_end_2	ENSG00000133112|ENST00000530705	143	-19.7	2	17	832	867	17	0.7059	0.7059	ENSG00000133112|ENST00000530705	mature-tRNA-Glu-TTC_5_end_2	0	45	50	45	50	6536	6mer	x	6mer	0		0	TPT1	protein_coding
ENSG00000179636	mature-tRNA-Glu-CTC_5_end_1	ENSG00000179636|ENST00000530140	169	-34.27	2	32	26	57	30	0.6	0.7333	ENSG00000179636|ENST00000530140	mature-tRNA-Glu-CTC_5_end_1	0	27	33	27	33	6593	7mer-1a	x	7mer-1a	0		0	TPPP2	protein_coding
ENSG00000179636	mature-tRNA-Glu-CTC_5_end_2	ENSG00000179636|ENST00000530140	163	-32.12	2	30	28	57	28	0.5714	0.75	ENSG00000179636|ENST00000530140	mature-tRNA-Glu-CTC_5_end_2	0	27	33	27	33	6594	7mer-1a	x	7mer-1a	0		0	TPPP2	protein_coding
ENSG00000179636	mature-tRNA-Glu-CTC_5_end_3	ENSG00000179636|ENST00000530140	163	-32.17	2	30	27	57	28	0.5714	0.75	ENSG00000179636|ENST00000530140	mature-tRNA-Glu-CTC_5_end_3	0	27	33	27	33	6595	7mer-1a	x	7mer-1a	0		0	TPPP2	protein_coding
ENSG00000149532	mature-tRNA-Glu-CTC_5_end_1	ENSG00000149532|ENST00000537162	162	-35.04	2	32	166	202	34	0.5294	0.7059	ENSG00000149532|ENST00000537162	mature-tRNA-Glu-CTC_5_end_1	0	43	49	43	49	6674	7mer-1a	x	7mer-1a	0		0	CPSF7	protein_coding
ENSG00000149532	mature-tRNA-Glu-CTC_5_end_2	ENSG00000149532|ENST00000537162	157	-27	2	29	174	202	27	0.5926	0.7037	ENSG00000149532|ENST00000537162	mature-tRNA-Glu-CTC_5_end_2	0	43	49	43	49	6675	7mer-1a	x	7mer-1a	0		0	CPSF7	protein_coding
ENSG00000149532	mature-tRNA-Glu-CTC_5_end_3	ENSG00000149532|ENST00000537162	157	-27.81	2	29	173	202	27	0.5926	0.7037	ENSG00000149532|ENST00000537162	mature-tRNA-Glu-CTC_5_end_3	0	43	49	43	49	6676	7mer-1a	x	7mer-1a	0		0	CPSF7	protein_coding
ENSG00000149532	mature-tRNA-Glu-CTC_5_end_1	ENSG00000149532|ENST00000535222	162	-35.04	2	32	177	213	34	0.5294	0.7059	ENSG00000149532|ENST00000535222	mature-tRNA-Glu-CTC_5_end_1	0	38	45	38	45	6696	8mer-1a	x	8mer-1a	0		0	CPSF7	protein_coding
ENSG00000149532	mature-tRNA-Glu-CTC_5_end_2	ENSG00000149532|ENST00000535222	157	-27	2	29	185	213	27	0.5926	0.7037	ENSG00000149532|ENST00000535222	mature-tRNA-Glu-CTC_5_end_2	0	38	45	38	45	6697	8mer-1a	x	8mer-1a	0		0	CPSF7	protein_coding
ENSG00000149532	mature-tRNA-Glu-CTC_5_end_3	ENSG00000149532|ENST00000535222	157	-27.81	2	29	184	213	27	0.5926	0.7037	ENSG00000149532|ENST00000535222	mature-tRNA-Glu-CTC_5_end_3	0	38	45	38	45	6698	8mer-1a	x	8mer-1a	0		0	CPSF7	protein_coding
ENSG00000243978	mature-tRNA-Asp-GTC_CCA_end_1	ENSG00000243978|ENST00000540313	158	-33.31	2	34	86	121	32	0.5312	0.6875	ENSG00000243978|ENST00000540313	mature-tRNA-Asp-GTC_CCA_end_1	0	37	43	37	43	6740	7mer-m8	x	7mer-m8	0		0	RTL9	protein_coding
ENSG00000184792	mature-tRNA-Gly-GCC_5_end_1	ENSG00000184792|ENST00000535268	155	-18.54	2	17	1288	1320	16	0.8125	0.8125	ENSG00000184792|ENST00000535268	mature-tRNA-Gly-GCC_5_end_1	0	44	50	44	50	6768	7mer-m8	x	7mer-m8	0		0	OSBP2	protein_coding
ENSG00000184792	mature-tRNA-Gly-GCC_5_end_2	ENSG00000184792|ENST00000535268	155	-18.54	2	17	1287	1320	16	0.8125	0.8125	ENSG00000184792|ENST00000535268	mature-tRNA-Gly-GCC_5_end_2	0	44	50	44	50	6769	7mer-m8	x	7mer-m8	0		0	OSBP2	protein_coding
ENSG00000184792	mature-tRNA-Gly-GCC_5_end_3	ENSG00000184792|ENST00000535268	155	-18.54	2	17	1286	1320	16	0.8125	0.8125	ENSG00000184792|ENST00000535268	mature-tRNA-Gly-GCC_5_end_3	0	44	50	44	50	6770	7mer-m8	x	7mer-m8	0		0	OSBP2	protein_coding
ENSG00000149489	mature-tRNA-Glu-CTC_5_end_1	ENSG00000149489|ENST00000534093	185	-39.51	2	31	267	300	30	0.6667	0.8	ENSG00000149489|ENST00000534093	mature-tRNA-Glu-CTC_5_end_1	0	44	50	44	50	6771	7mer-1a	x	7mer-1a	0		0	ROM1	protein_coding
ENSG00000149489	mature-tRNA-Glu-CTC_5_end_2	ENSG00000149489|ENST00000534093	176	-37.66	2	30	269	300	29	0.6207	0.7931	ENSG00000149489|ENST00000534093	mature-tRNA-Glu-CTC_5_end_2	0	44	50	44	50	6772	7mer-1a	x	7mer-1a	0		0	ROM1	protein_coding
ENSG00000149489	mature-tRNA-Glu-CTC_5_end_3	ENSG00000149489|ENST00000534093	181	-37.66	2	31	268	300	30	0.6333	0.8	ENSG00000149489|ENST00000534093	mature-tRNA-Glu-CTC_5_end_3	0	44	50	44	50	6773	7mer-1a	x	7mer-1a	0		0	ROM1	protein_coding
ENSG00000185737	mature-tRNA-Glu-TTC_5_end_1	ENSG00000185737|ENST00000545131	167	-25.79	2	24	248	280	22	0.5909	0.8636	ENSG00000185737|ENST00000545131	mature-tRNA-Glu-TTC_5_end_1	0	53	58	53	58	6867	6mer	x	6mer	0		0	NRG3	protein_coding
ENSG00000185737	mature-tRNA-Glu-TTC_5_end_2	ENSG00000185737|ENST00000545131	167	-27.13	2	24	247	280	22	0.5909	0.8636	ENSG00000185737|ENST00000545131	mature-tRNA-Glu-TTC_5_end_2	0	53	58	53	58	6868	6mer	x	6mer	0		0	NRG3	protein_coding
ENSG00000188039	mature-tRNA-Glu-TTC_5_end_1	ENSG00000188039|ENST00000552788	154	-27.56	2	32	1118	1154	34	0.5294	0.6471	ENSG00000188039|ENST00000552788	mature-tRNA-Glu-TTC_5_end_1	0	37	43	37	43	7004	7mer-1a	x	7mer-1a	0		0	NWD1	protein_coding
ENSG00000188039	mature-tRNA-Glu-TTC_5_end_2	ENSG00000188039|ENST00000552788	154	-27.73	2	32	1117	1154	34	0.5294	0.6471	ENSG00000188039|ENST00000552788	mature-tRNA-Glu-TTC_5_end_2	0	37	43	37	43	7005	7mer-1a	x	7mer-1a	0		0	NWD1	protein_coding
ENSG00000080823	mature-tRNA-Glu-CTC_5_end_1	ENSG00000080823|ENST00000559138	151	-28.07	2	23	417	449	22	0.6818	0.7273	ENSG00000080823|ENST00000559138	mature-tRNA-Glu-CTC_5_end_1	0	51	56	51	56	7058	6mer	x	6mer	0		0	MOK	protein_coding
ENSG00000080823	mature-tRNA-Glu-CTC_5_end_2	ENSG00000080823|ENST00000559138	151	-24.05	2	23	419	449	22	0.6818	0.7273	ENSG00000080823|ENST00000559138	mature-tRNA-Glu-CTC_5_end_2	0	51	56	51	56	7059	6mer	x	6mer	0		0	MOK	protein_coding
ENSG00000080823	mature-tRNA-Glu-CTC_5_end_3	ENSG00000080823|ENST00000559138	151	-25.72	2	23	418	449	22	0.6818	0.7273	ENSG00000080823|ENST00000559138	mature-tRNA-Glu-CTC_5_end_3	0	51	56	51	56	7060	6mer	x	6mer	0		0	MOK	protein_coding
ENSG00000100906	mature-tRNA-Glu-TTC_5_end_1	ENSG00000100906|ENST00000557140	195	-42.45	2	32	349	381	30	0.6667	0.8333	ENSG00000100906|ENST00000557140	mature-tRNA-Glu-TTC_5_end_1	0	21	26	21	26	7196	6mer	x	6mer	0		0	NFKBIA	protein_coding
ENSG00000100906	mature-tRNA-Glu-TTC_5_end_2	ENSG00000100906|ENST00000557140	196	-43.15	2	33	348	381	31	0.6452	0.8387	ENSG00000100906|ENST00000557140	mature-tRNA-Glu-TTC_5_end_2	0	21	26	21	26	7197	6mer	x	6mer	0		0	NFKBIA	protein_coding
ENSG00000169957	mature-tRNA-Glu-CTC_5_end_1	ENSG00000169957|ENST00000562803	163	-33.06	2	31	103	136	31	0.6129	0.7097	ENSG00000169957|ENST00000562803	mature-tRNA-Glu-CTC_5_end_1	0	34	39	34	39	7201	6mer	x	6mer	0		0	ZNF768	protein_coding
ENSG00000169957	mature-tRNA-Glu-CTC_5_end_2	ENSG00000169957|ENST00000562803	161	-28.39	2	28	107	136	26	0.6154	0.7308	ENSG00000169957|ENST00000562803	mature-tRNA-Glu-CTC_5_end_2	0	34	39	34	39	7202	6mer	x	6mer	0		0	ZNF768	protein_coding
ENSG00000169957	mature-tRNA-Glu-CTC_5_end_3	ENSG00000169957|ENST00000562803	163	-30.78	2	31	104	136	31	0.6129	0.7097	ENSG00000169957|ENST00000562803	mature-tRNA-Glu-CTC_5_end_3	0	34	39	34	39	7203	6mer	x	6mer	0		0	ZNF768	protein_coding
ENSG00000140009	mature-tRNA-Glu-TTC_5_end_1	ENSG00000140009|ENST00000553796	154	-27.37	2	32	138	175	37	0.5946	0.6486	ENSG00000140009|ENST00000553796	mature-tRNA-Glu-TTC_5_end_1	0	23	29	23	29	7204	7mer-1a	x	7mer-1a	0		0	ESR2	protein_coding
ENSG00000140009	mature-tRNA-Glu-TTC_5_end_2	ENSG00000140009|ENST00000553796	155	-27.37	2	33	137	175	38	0.5789	0.6579	ENSG00000140009|ENST00000553796	mature-tRNA-Glu-TTC_5_end_2	0	23	29	23	29	7205	7mer-1a	x	7mer-1a	0		0	ESR2	protein_coding
ENSG00000173517	mature-tRNA-Glu-CTC_5_end_1	ENSG00000173517|ENST00000560626	174	-30.79	2	32	12376	12409	31	0.6129	0.7419	ENSG00000173517|ENST00000560626	mature-tRNA-Glu-CTC_5_end_1	0	31	37	31	37	7321	7mer-1a	x	7mer-1a	0		0	PEAK1	protein_coding
ENSG00000173517	mature-tRNA-Glu-CTC_5_end_2	ENSG00000173517|ENST00000560626	168	-31.54	2	30	12378	12409	29	0.5862	0.7586	ENSG00000173517|ENST00000560626	mature-tRNA-Glu-CTC_5_end_2	0	31	37	31	37	7322	7mer-1a	x	7mer-1a	0		0	PEAK1	protein_coding
ENSG00000173517	mature-tRNA-Glu-CTC_5_end_3	ENSG00000173517|ENST00000560626	168	-31.54	2	30	12377	12409	29	0.5862	0.7586	ENSG00000173517|ENST00000560626	mature-tRNA-Glu-CTC_5_end_3	0	31	37	31	37	7323	7mer-1a	x	7mer-1a	0		0	PEAK1	protein_coding
ENSG00000165914	mature-tRNA-Glu-CTC_5_end_1	ENSG00000165914|ENST00000555005	165	-39.19	2	32	720	757	35	0.5714	0.7143	ENSG00000165914|ENST00000555005	mature-tRNA-Glu-CTC_5_end_1	0	15	20	15	20	7338	6mer	x	6mer	0		0	TTC7B	protein_coding
ENSG00000165914	mature-tRNA-Glu-CTC_5_end_2	ENSG00000165914|ENST00000555005	155	-37.03	2	25	725	757	25	0.6	0.72	ENSG00000165914|ENST00000555005	mature-tRNA-Glu-CTC_5_end_2	0	15	20	15	20	7339	6mer	x	6mer	0		0	TTC7B	protein_coding
ENSG00000165914	mature-tRNA-Glu-CTC_5_end_3	ENSG00000165914|ENST00000555005	160	-37.27	2	31	721	757	34	0.5588	0.7059	ENSG00000165914|ENST00000555005	mature-tRNA-Glu-CTC_5_end_3	0	15	20	15	20	7340	6mer	x	6mer	0		0	TTC7B	protein_coding
ENSG00000180008	mature-tRNA-Glu-TTC_5_end_1	ENSG00000180008|ENST00000555846	159	-23.96	2	27	2616	2646	25	0.6	0.76	ENSG00000180008|ENST00000555846	mature-tRNA-Glu-TTC_5_end_1	0	49	54	49	54	7365	6mer	x	6mer	0		0	SOCS4	protein_coding
ENSG00000180008	mature-tRNA-Glu-TTC_5_end_2	ENSG00000180008|ENST00000555846	160	-23.96	2	33	2614	2646	32	0.5625	0.7188	ENSG00000180008|ENST00000555846	mature-tRNA-Glu-TTC_5_end_2	0	49	54	49	54	7366	6mer	x	6mer	0		0	SOCS4	protein_coding
ENSG00000102893	mature-tRNA-Glu-CTC_5_end_1	ENSG00000102893|ENST00000570047	176	-31.06	2	29	117	146	27	0.5926	0.8148	ENSG00000102893|ENST00000570047	mature-tRNA-Glu-CTC_5_end_1	0	39	45	39	45	7390	7mer-m8	x	7mer-m8	0		0	PHKB	protein_coding
ENSG00000102893	mature-tRNA-Glu-CTC_5_end_2	ENSG00000102893|ENST00000570047	176	-31.06	2	29	116	146	27	0.5926	0.8148	ENSG00000102893|ENST00000570047	mature-tRNA-Glu-CTC_5_end_2	0	39	45	39	45	7391	7mer-m8	x	7mer-m8	0		0	PHKB	protein_coding
ENSG00000102893	mature-tRNA-Glu-CTC_5_end_3	ENSG00000102893|ENST00000570047	176	-31.06	2	29	115	146	27	0.5926	0.8148	ENSG00000102893|ENST00000570047	mature-tRNA-Glu-CTC_5_end_3	0	39	45	39	45	7392	7mer-m8	x	7mer-m8	0		0	PHKB	protein_coding
ENSG00000103356	mature-tRNA-Glu-CTC_5_end_1	ENSG00000103356|ENST00000564997	163	-27.41	2	26	56	84	24	0.625	0.7917	ENSG00000103356|ENST00000564997	mature-tRNA-Glu-CTC_5_end_1	0	51	57	51	57	7426	7mer-m8	x	7mer-m8	0		0	EARS2	protein_coding
ENSG00000103356	mature-tRNA-Glu-CTC_5_end_2	ENSG00000103356|ENST00000564997	163	-27.41	2	26	55	84	24	0.625	0.7917	ENSG00000103356|ENST00000564997	mature-tRNA-Glu-CTC_5_end_2	0	51	57	51	57	7427	7mer-m8	x	7mer-m8	0		0	EARS2	protein_coding
ENSG00000103356	mature-tRNA-Glu-CTC_5_end_3	ENSG00000103356|ENST00000564997	163	-27.41	2	26	54	84	24	0.625	0.7917	ENSG00000103356|ENST00000564997	mature-tRNA-Glu-CTC_5_end_3	0	51	57	51	57	7428	7mer-m8	x	7mer-m8	0		0	EARS2	protein_coding
ENSG00000137842	mature-tRNA-Glu-CTC_5_end_1	ENSG00000137842|ENST00000568197	165	-29.9	2	31	35	68	30	0.5667	0.7333	ENSG00000137842|ENST00000568197	mature-tRNA-Glu-CTC_5_end_1	0	31	38	31	38	7508	8mer-1a	x	8mer-1a	0		0	TMEM62	protein_coding
ENSG00000137842	mature-tRNA-Glu-CTC_5_end_2	ENSG00000137842|ENST00000568197	160	-25.71	2	29	38	68	27	0.5185	0.7407	ENSG00000137842|ENST00000568197	mature-tRNA-Glu-CTC_5_end_2	0	31	38	31	38	7509	8mer-1a	x	8mer-1a	0		0	TMEM62	protein_coding
ENSG00000137842	mature-tRNA-Glu-CTC_5_end_3	ENSG00000137842|ENST00000568197	161	-26.92	2	31	36	68	30	0.5333	0.7333	ENSG00000137842|ENST00000568197	mature-tRNA-Glu-CTC_5_end_3	0	31	38	31	38	7510	8mer-1a	x	8mer-1a	0		0	TMEM62	protein_coding
ENSG00000135686	mature-tRNA-Glu-CTC_5_end_1	ENSG00000135686|ENST00000564996	152	-24.72	2	29	585	614	27	0.4444	0.7407	ENSG00000135686|ENST00000564996	mature-tRNA-Glu-CTC_5_end_1	0	43	49	43	49	7566	7mer-1a	x	7mer-1a	0		0	KLHL36	protein_coding
ENSG00000135686	mature-tRNA-Glu-CTC_5_end_2	ENSG00000135686|ENST00000564996	152	-24.72	2	29	584	614	27	0.4444	0.7407	ENSG00000135686|ENST00000564996	mature-tRNA-Glu-CTC_5_end_2	0	43	49	43	49	7567	7mer-1a	x	7mer-1a	0		0	KLHL36	protein_coding
ENSG00000135686	mature-tRNA-Glu-CTC_5_end_3	ENSG00000135686|ENST00000564996	152	-27.32	2	29	583	614	27	0.4444	0.7407	ENSG00000135686|ENST00000564996	mature-tRNA-Glu-CTC_5_end_3	0	43	49	43	49	7568	7mer-1a	x	7mer-1a	0		0	KLHL36	protein_coding
ENSG00000137842	mature-tRNA-Glu-CTC_5_end_1	ENSG00000137842|ENST00000567441	165	-29.9	2	31	35	68	30	0.5667	0.7333	ENSG00000137842|ENST00000567441	mature-tRNA-Glu-CTC_5_end_1	0	40	45	40	45	7572	6mer	x	6mer	0		0	TMEM62	protein_coding
ENSG00000137842	mature-tRNA-Glu-CTC_5_end_2	ENSG00000137842|ENST00000567441	160	-25.71	2	29	38	68	27	0.5185	0.7407	ENSG00000137842|ENST00000567441	mature-tRNA-Glu-CTC_5_end_2	0	40	45	40	45	7573	6mer	x	6mer	0		0	TMEM62	protein_coding
ENSG00000137842	mature-tRNA-Glu-CTC_5_end_3	ENSG00000137842|ENST00000567441	161	-26.92	2	31	36	68	30	0.5333	0.7333	ENSG00000137842|ENST00000567441	mature-tRNA-Glu-CTC_5_end_3	0	40	45	40	45	7574	6mer	x	6mer	0		0	TMEM62	protein_coding
ENSG00000166596	mature-tRNA-Glu-TTC_5_end_1	ENSG00000166596|ENST00000575247	162	-32.59	2	29	324	355	29	0.6552	0.7586	ENSG00000166596|ENST00000575247	mature-tRNA-Glu-TTC_5_end_1	0	42	47	42	47	7596	6mer	x	6mer	0		0	CFAP52	protein_coding
ENSG00000166596	mature-tRNA-Glu-TTC_5_end_2	ENSG00000166596|ENST00000575247	162	-34.15	2	29	323	355	29	0.6552	0.7586	ENSG00000166596|ENST00000575247	mature-tRNA-Glu-TTC_5_end_2	0	42	47	42	47	7597	6mer	x	6mer	0		0	CFAP52	protein_coding
ENSG00000213398	mature-tRNA-Glu-CTC_5_end_1	ENSG00000213398|ENST00000573538	157	-30.77	2	32	52	83	30	0.5	0.7333	ENSG00000213398|ENST00000573538	mature-tRNA-Glu-CTC_5_end_1	0	46	52	46	52	7645	7mer-m8	x	7mer-m8	0		0	LCAT	protein_coding
ENSG00000213398	mature-tRNA-Glu-CTC_5_end_2	ENSG00000213398|ENST00000573538	152	-25.57	2	13	53	83	11	0.9091	0.9091	ENSG00000213398|ENST00000573538	mature-tRNA-Glu-CTC_5_end_2	0	46	52	46	52	7646	7mer-m8	x	7mer-m8	0		0	LCAT	protein_coding
ENSG00000213398	mature-tRNA-Glu-CTC_5_end_3	ENSG00000213398|ENST00000573538	152	-27.96	2	13	52	83	11	0.9091	0.9091	ENSG00000213398|ENST00000573538	mature-tRNA-Glu-CTC_5_end_3	0	46	52	46	52	7647	7mer-m8	x	7mer-m8	0		0	LCAT	protein_coding
ENSG00000182963	mature-tRNA-Glu-CTC_5_end_1	ENSG00000182963|ENST00000592524	156	-30.37	2	31	1368	1399	29	0.5172	0.7241	ENSG00000182963|ENST00000592524	mature-tRNA-Glu-CTC_5_end_1	0	33	38	33	38	7718	6mer	x	6mer	0		0	GJC1	protein_coding
ENSG00000182963	mature-tRNA-Glu-CTC_5_end_2	ENSG00000182963|ENST00000592524	154	-26.4	2	21	1370	1399	19	0.6316	0.8421	ENSG00000182963|ENST00000592524	mature-tRNA-Glu-CTC_5_end_2	0	33	38	33	38	7719	6mer	x	6mer	0		0	GJC1	protein_coding
ENSG00000182963	mature-tRNA-Glu-CTC_5_end_3	ENSG00000182963|ENST00000592524	156	-26.4	2	31	1369	1399	29	0.5172	0.7241	ENSG00000182963|ENST00000592524	mature-tRNA-Glu-CTC_5_end_3	0	33	38	33	38	7720	6mer	x	6mer	0		0	GJC1	protein_coding
ENSG00000072062	mature-tRNA-Glu-TTC_5_end_1	ENSG00000072062|ENST00000593092	145	-25.82	2	32	176	204	30	0.5	0.7	ENSG00000072062|ENST00000593092	mature-tRNA-Glu-TTC_5_end_1	0	55	60	55	60	7787	6mer	x	6mer	0		0	PRKACA	protein_coding
ENSG00000072062	mature-tRNA-Glu-TTC_5_end_2	ENSG00000072062|ENST00000593092	145	-25.99	2	32	175	204	30	0.5	0.7	ENSG00000072062|ENST00000593092	mature-tRNA-Glu-TTC_5_end_2	0	55	60	55	60	7788	6mer	x	6mer	0		0	PRKACA	protein_coding
ENSG00000168591	mature-tRNA-Glu-TTC_5_end_1	ENSG00000168591|ENST00000587172	155	-27.05	2	24	146	179	24	0.625	0.8333	ENSG00000168591|ENST00000587172	mature-tRNA-Glu-TTC_5_end_1	0	31	36	31	36	7791	6mer	x	6mer	0		0	TMUB2	protein_coding
ENSG00000168591	mature-tRNA-Glu-TTC_5_end_2	ENSG00000168591|ENST00000587172	160	-27.43	2	33	145	179	33	0.5455	0.7576	ENSG00000168591|ENST00000587172	mature-tRNA-Glu-TTC_5_end_2	0	31	36	31	36	7792	6mer	x	6mer	0		0	TMUB2	protein_coding
ENSG00000125503	mature-tRNA-Glu-CTC_5_end_1	ENSG00000125503|ENST00000591938	157	-26.69	2	28	210	238	26	0.5769	0.7308	ENSG00000125503|ENST00000591938	mature-tRNA-Glu-CTC_5_end_1	0	23	28	23	28	7808	6mer	x	6mer	0		0	PPP1R12C	protein_coding
ENSG00000125503	mature-tRNA-Glu-CTC_5_end_2	ENSG00000125503|ENST00000591938	157	-26.95	2	28	209	238	26	0.5769	0.7308	ENSG00000125503|ENST00000591938	mature-tRNA-Glu-CTC_5_end_2	0	23	28	23	28	7809	6mer	x	6mer	0		0	PPP1R12C	protein_coding
ENSG00000125503	mature-tRNA-Glu-CTC_5_end_3	ENSG00000125503|ENST00000591938	157	-27.38	2	28	208	238	26	0.5769	0.7308	ENSG00000125503|ENST00000591938	mature-tRNA-Glu-CTC_5_end_3	0	23	28	23	28	7810	6mer	x	6mer	0		0	PPP1R12C	protein_coding
ENSG00000062716	mature-tRNA-Glu-TTC_5_end_1	ENSG00000062716|ENST00000593168	156	-28.07	2	32	124	157	32	0.5312	0.7188	ENSG00000062716|ENST00000593168	mature-tRNA-Glu-TTC_5_end_1	0	42	47	42	47	7816	6mer	x	6mer	0		0	VMP1	protein_coding
ENSG00000062716	mature-tRNA-Glu-TTC_5_end_2	ENSG00000062716|ENST00000593168	156	-29.1	2	32	123	157	32	0.5312	0.7188	ENSG00000062716|ENST00000593168	mature-tRNA-Glu-TTC_5_end_2	0	42	47	42	47	7817	6mer	x	6mer	0		0	VMP1	protein_coding
ENSG00000166960	mature-tRNA-Gly-GCC_5_end_1	ENSG00000166960|ENST00000581852	152	-14.5	2	13	1	15	11	0.9091	0.9091	ENSG00000166960|ENST00000581852	mature-tRNA-Gly-GCC_5_end_1	0	46	52	46	52	7818	7mer-m8	x	7mer-m8	0		0	CCDC178	protein_coding
ENSG00000166960	mature-tRNA-Gly-GCC_5_end_2	ENSG00000166960|ENST00000581852	152	-14.65	2	13	1	15	11	0.9091	0.9091	ENSG00000166960|ENST00000581852	mature-tRNA-Gly-GCC_5_end_2	0	46	52	46	52	7819	7mer-m8	x	7mer-m8	0		0	CCDC178	protein_coding
ENSG00000166960	mature-tRNA-Gly-GCC_5_end_3	ENSG00000166960|ENST00000581852	152	-15.46	2	13	1	15	11	0.9091	0.9091	ENSG00000166960|ENST00000581852	mature-tRNA-Gly-GCC_5_end_3	0	46	52	46	52	7820	7mer-m8	x	7mer-m8	0		0	CCDC178	protein_coding
ENSG00000196605	mature-tRNA-Glu-TTC_5_end_1	ENSG00000196605|ENST00000589453	146	-24.42	2	27	320	353	27	0.5556	0.7407	ENSG00000196605|ENST00000589453	mature-tRNA-Glu-TTC_5_end_1	0	47	52	47	52	7823	6mer	x	6mer	0		0	ZNF846	protein_coding
ENSG00000196605	mature-tRNA-Glu-TTC_5_end_2	ENSG00000196605|ENST00000589453	146	-24.67	2	27	319	353	27	0.5556	0.7407	ENSG00000196605|ENST00000589453	mature-tRNA-Glu-TTC_5_end_2	0	47	52	47	52	7824	6mer	x	6mer	0		0	ZNF846	protein_coding
ENSG00000130204	mature-tRNA-Glu-CTC_5_end_1	ENSG00000130204|ENST00000592434	165	-35.89	2	32	48	84	34	0.5588	0.7353	ENSG00000130204|ENST00000592434	mature-tRNA-Glu-CTC_5_end_1	0	24	29	24	29	7865	6mer	x	6mer	0		0	TOMM40	protein_coding
ENSG00000130204	mature-tRNA-Glu-CTC_5_end_2	ENSG00000130204|ENST00000592434	160	-32.79	2	21	54	84	19	0.6316	0.8421	ENSG00000130204|ENST00000592434	mature-tRNA-Glu-CTC_5_end_2	0	24	29	24	29	7866	6mer	x	6mer	0		0	TOMM40	protein_coding
ENSG00000130204	mature-tRNA-Glu-CTC_5_end_3	ENSG00000130204|ENST00000592434	164	-38.95	2	31	49	84	33	0.5758	0.7273	ENSG00000130204|ENST00000592434	mature-tRNA-Glu-CTC_5_end_3	0	24	29	24	29	7867	6mer	x	6mer	0		0	TOMM40	protein_coding
ENSG00000196946	mature-tRNA-Glu-CTC_5_end_1	ENSG00000196946|ENST00000610508	168	-32.58	2	29	1370	1398	28	0.7143	0.7143	ENSG00000196946|ENST00000610508	mature-tRNA-Glu-CTC_5_end_1	0	15	20	15	20	7950	6mer	x	6mer	0		0	ZNF705A	protein_coding
ENSG00000196946	mature-tRNA-Glu-CTC_5_end_2	ENSG00000196946|ENST00000610508	169	-33.08	2	30	1369	1398	29	0.6897	0.7241	ENSG00000196946|ENST00000610508	mature-tRNA-Glu-CTC_5_end_2	0	15	20	15	20	7951	6mer	x	6mer	0		0	ZNF705A	protein_coding
ENSG00000196946	mature-tRNA-Glu-CTC_5_end_3	ENSG00000196946|ENST00000610508	169	-33.44	2	30	1368	1398	29	0.6897	0.7241	ENSG00000196946|ENST00000610508	mature-tRNA-Glu-CTC_5_end_3	0	15	20	15	20	7952	6mer	x	6mer	0		0	ZNF705A	protein_coding
ENSG00000270617	mature-tRNA-Glu-TTC_5_end_1	ENSG00000270617|ENST00000603700	175	-36.27	2	30	62	96	30	0.6333	0.8	ENSG00000270617|ENST00000603700	mature-tRNA-Glu-TTC_5_end_1	0	16	21	16	21	7974	6mer	x	6mer	0		0	URGCP-MRPS24	protein_coding
ENSG00000270617	mature-tRNA-Glu-TTC_5_end_2	ENSG00000270617|ENST00000603700	175	-37.31	2	30	61	96	30	0.6333	0.8	ENSG00000270617|ENST00000603700	mature-tRNA-Glu-TTC_5_end_2	0	16	21	16	21	7975	6mer	x	6mer	0		0	URGCP-MRPS24	protein_coding
ENSG00000213967	mature-tRNA-Glu-TTC_5_end_1	ENSG00000213967|ENST00000594466	162	-25.7	2	30	157	192	31	0.6452	0.7097	ENSG00000213967|ENST00000594466	mature-tRNA-Glu-TTC_5_end_1	0	24	29	24	29	8006	6mer	x	6mer	0		0	ZNF726	protein_coding
ENSG00000213967	mature-tRNA-Glu-TTC_5_end_2	ENSG00000213967|ENST00000594466	162	-27.68	2	30	156	192	31	0.6452	0.7097	ENSG00000213967|ENST00000594466	mature-tRNA-Glu-TTC_5_end_2	0	24	29	24	29	8007	6mer	x	6mer	0		0	ZNF726	protein_coding
ENSG00000090006	mature-tRNA-Asp-GTC_CCA_end_1	ENSG00000090006|ENST00000598166	157	-47.59	2	31	117	160	35	0.6286	0.7143	ENSG00000090006|ENST00000598166	mature-tRNA-Asp-GTC_CCA_end_1	0	15	21	15	21	8031	7mer-1a	x	7mer-1a	0		0	LTBP4	protein_coding
ENSG00000062822	mature-tRNA-Glu-CTC_5_end_1	ENSG00000062822|ENST00000600859	149	-29.76	2	28	194	230	30	0.5667	0.6667	ENSG00000062822|ENST00000600859	mature-tRNA-Glu-CTC_5_end_1	0	17	22	17	22	8062	6mer	x	6mer	0		0	POLD1	protein_coding
ENSG00000062822	mature-tRNA-Glu-CTC_5_end_2	ENSG00000062822|ENST00000600859	145	-27.46	2	28	196	230	30	0.5333	0.6667	ENSG00000062822|ENST00000600859	mature-tRNA-Glu-CTC_5_end_2	0	17	22	17	22	8063	6mer	x	6mer	0		0	POLD1	protein_coding
ENSG00000062822	mature-tRNA-Glu-CTC_5_end_3	ENSG00000062822|ENST00000600859	145	-28.18	2	28	195	230	30	0.5333	0.6667	ENSG00000062822|ENST00000600859	mature-tRNA-Glu-CTC_5_end_3	0	17	22	17	22	8064	6mer	x	6mer	0		0	POLD1	protein_coding
ENSG00000160961	mature-tRNA-Glu-TTC_5_end_1	ENSG00000160961|ENST00000598161	164	-28.24	2	30	1224	1257	31	0.6129	0.7742	ENSG00000160961|ENST00000598161	mature-tRNA-Glu-TTC_5_end_1	0	34	40	34	40	8080	7mer-1a	x	7mer-1a	0		0	ZNF333	protein_coding
ENSG00000160961	mature-tRNA-Glu-TTC_5_end_2	ENSG00000160961|ENST00000598161	164	-28.24	2	30	1223	1257	31	0.6129	0.7742	ENSG00000160961|ENST00000598161	mature-tRNA-Glu-TTC_5_end_2	0	34	40	34	40	8081	7mer-1a	x	7mer-1a	0		0	ZNF333	protein_coding
ENSG00000134987	mature-tRNA-Glu-TTC_5_end_1	ENSG00000134987|ENST00000612402	161	-28.34	2	30	749	783	31	0.6452	0.7097	ENSG00000134987|ENST00000612402	mature-tRNA-Glu-TTC_5_end_1	0	45	50	45	50	8088	6mer	x	6mer	0		0	WDR36	protein_coding
ENSG00000134987	mature-tRNA-Glu-TTC_5_end_2	ENSG00000134987|ENST00000612402	161	-28.34	2	30	748	783	31	0.6452	0.7097	ENSG00000134987|ENST00000612402	mature-tRNA-Glu-TTC_5_end_2	0	45	50	45	50	8089	6mer	x	6mer	0		0	WDR36	protein_coding
ENSG00000186501	mature-tRNA-Glu-CTC_5_end_1	ENSG00000186501|ENST00000608611	160	-33.57	2	31	1	32	31	0.6452	0.7419	ENSG00000186501|ENST00000608611	mature-tRNA-Glu-CTC_5_end_1	0	42	47	42	47	8117	6mer	x	6mer	0		0	TMEM222	protein_coding
ENSG00000186501	mature-tRNA-Glu-CTC_5_end_2	ENSG00000186501|ENST00000608611	158	-35.48	2	22	2	32	21	0.7143	0.8095	ENSG00000186501|ENST00000608611	mature-tRNA-Glu-CTC_5_end_2	0	42	47	42	47	8118	6mer	x	6mer	0		0	TMEM222	protein_coding
ENSG00000186501	mature-tRNA-Glu-CTC_5_end_3	ENSG00000186501|ENST00000608611	160	-37.04	2	31	1	32	31	0.6452	0.7419	ENSG00000186501|ENST00000608611	mature-tRNA-Glu-CTC_5_end_3	0	42	47	42	47	8119	6mer	x	6mer	0		0	TMEM222	protein_coding
ENSG00000105486	mature-tRNA-Glu-CTC_5_end_1	ENSG00000105486|ENST00000601091	166	-32.84	2	24	404	437	23	0.6957	0.7826	ENSG00000105486|ENST00000601091	mature-tRNA-Glu-CTC_5_end_1	0	35	40	35	40	8123	6mer	x	6mer	0		0	LIG1	protein_coding
ENSG00000105486	mature-tRNA-Glu-CTC_5_end_2	ENSG00000105486|ENST00000601091	162	-35.44	2	24	406	437	23	0.6522	0.7826	ENSG00000105486|ENST00000601091	mature-tRNA-Glu-CTC_5_end_2	0	35	40	35	40	8124	6mer	x	6mer	0		0	LIG1	protein_coding
ENSG00000105486	mature-tRNA-Glu-CTC_5_end_3	ENSG00000105486|ENST00000601091	162	-35.44	2	24	405	437	23	0.6522	0.7826	ENSG00000105486|ENST00000601091	mature-tRNA-Glu-CTC_5_end_3	0	35	40	35	40	8125	6mer	x	6mer	0		0	LIG1	protein_coding
ENSG00000160695	mature-tRNA-Glu-TTC_5_end_1	ENSG00000160695|ENST00000614944	151	-24.3	2	21	1	23	20	0.65	0.75	ENSG00000160695|ENST00000614944	mature-tRNA-Glu-TTC_5_end_1	0	43	49	43	49	8289	7mer-m8	x	7mer-m8	0		0	VPS11	protein_coding
ENSG00000160695	mature-tRNA-Glu-TTC_5_end_2	ENSG00000160695|ENST00000614944	151	-24.5	2	21	1	23	20	0.65	0.75	ENSG00000160695|ENST00000614944	mature-tRNA-Glu-TTC_5_end_2	0	43	49	43	49	8290	7mer-m8	x	7mer-m8	0		0	VPS11	protein_coding
ENSG00000124507	mature-tRNA-Glu-CTC_5_end_1	ENSG00000124507|ENST00000620693	162	-33.25	2	30	2460	2493	30	0.5667	0.7667	ENSG00000124507|ENST00000620693	mature-tRNA-Glu-CTC_5_end_1	0	39	44	39	44	8336	6mer	x	6mer	0		0	PACSIN1	protein_coding
ENSG00000124507	mature-tRNA-Glu-CTC_5_end_2	ENSG00000124507|ENST00000620693	158	-29.87	2	30	2462	2493	30	0.5333	0.7667	ENSG00000124507|ENST00000620693	mature-tRNA-Glu-CTC_5_end_2	0	39	44	39	44	8337	6mer	x	6mer	0		0	PACSIN1	protein_coding
ENSG00000124507	mature-tRNA-Glu-CTC_5_end_3	ENSG00000124507|ENST00000620693	158	-29.87	2	30	2461	2493	30	0.5333	0.7667	ENSG00000124507|ENST00000620693	mature-tRNA-Glu-CTC_5_end_3	0	39	44	39	44	8338	6mer	x	6mer	0		0	PACSIN1	protein_coding
ENSG00000108219	mature-tRNA-Glu-TTC_5_end_1	ENSG00000108219|ENST00000616406	151	-26.55	2	32	223	255	30	0.4667	0.6667	ENSG00000108219|ENST00000616406	mature-tRNA-Glu-TTC_5_end_1	0	34	40	34	40	8358	7mer-1a	x	7mer-1a	0		0	TSPAN14	protein_coding
ENSG00000108219	mature-tRNA-Glu-TTC_5_end_2	ENSG00000108219|ENST00000616406	151	-27.18	2	32	222	255	30	0.4667	0.6667	ENSG00000108219|ENST00000616406	mature-tRNA-Glu-TTC_5_end_2	0	34	40	34	40	8359	7mer-1a	x	7mer-1a	0		0	TSPAN14	protein_coding
ENSG00000117281	mature-tRNA-Glu-TTC_5_end_1	ENSG00000117281|ENST00000616463	152	-28.63	2	31	1742	1774	31	0.6129	0.7097	ENSG00000117281|ENST00000616463	mature-tRNA-Glu-TTC_5_end_1	0	43	50	43	50	8405	8mer-1a	x	8mer-1a	0		0	CD160	protein_coding
ENSG00000117281	mature-tRNA-Glu-TTC_5_end_2	ENSG00000117281|ENST00000616463	153	-29.04	2	33	1740	1774	34	0.6176	0.7059	ENSG00000117281|ENST00000616463	mature-tRNA-Glu-TTC_5_end_2	0	43	50	43	50	8406	8mer-1a	x	8mer-1a	0		0	CD160	protein_coding
ENSG00000214575	mature-tRNA-Glu-CTC_5_end_1	ENSG00000214575|ENST00000615198	173	-38.04	2	26	62	89	24	0.75	0.8333	ENSG00000214575|ENST00000615198	mature-tRNA-Glu-CTC_5_end_1	0	43	48	43	48	8407	6mer	x	6mer	0		0	CPEB1	protein_coding
ENSG00000214575	mature-tRNA-Glu-CTC_5_end_2	ENSG00000214575|ENST00000615198	173	-38.73	2	26	61	89	24	0.75	0.8333	ENSG00000214575|ENST00000615198	mature-tRNA-Glu-CTC_5_end_2	0	43	48	43	48	8408	6mer	x	6mer	0		0	CPEB1	protein_coding
ENSG00000214575	mature-tRNA-Glu-CTC_5_end_3	ENSG00000214575|ENST00000615198	174	-39.54	2	31	60	89	29	0.6897	0.7586	ENSG00000214575|ENST00000615198	mature-tRNA-Glu-CTC_5_end_3	0	43	48	43	48	8409	6mer	x	6mer	0		0	CPEB1	protein_coding
ENSG00000081692	mature-tRNA-Glu-CTC_5_end_1	ENSG00000081692|ENST00000620518	167	-31.91	2	27	416	446	25	0.64	0.8	ENSG00000081692|ENST00000620518	mature-tRNA-Glu-CTC_5_end_1	0	55	60	55	60	8477	6mer	x	6mer	0		0	JMJD4	protein_coding
ENSG00000081692	mature-tRNA-Glu-CTC_5_end_2	ENSG00000081692|ENST00000620518	167	-28.43	2	27	418	446	25	0.64	0.8	ENSG00000081692|ENST00000620518	mature-tRNA-Glu-CTC_5_end_2	0	55	60	55	60	8478	6mer	x	6mer	0		0	JMJD4	protein_coding
ENSG00000081692	mature-tRNA-Glu-CTC_5_end_3	ENSG00000081692|ENST00000620518	167	-30.53	2	27	417	446	25	0.64	0.8	ENSG00000081692|ENST00000620518	mature-tRNA-Glu-CTC_5_end_3	0	55	60	55	60	8479	6mer	x	6mer	0		0	JMJD4	protein_coding
ENSG00000157335	mature-tRNA-Glu-CTC_5_end_1	ENSG00000157335|ENST00000618957	152	-28.7	2	32	660	686	30	0.5667	0.6667	ENSG00000157335|ENST00000618957	mature-tRNA-Glu-CTC_5_end_1	0	44	49	44	49	8537	6mer	x	6mer	0		0	CLEC18C	protein_coding
ENSG00000157335	mature-tRNA-Glu-CTC_5_end_2	ENSG00000157335|ENST00000618957	146	-28.12	2	23	656	686	21	0.5238	0.7143	ENSG00000157335|ENST00000618957	mature-tRNA-Glu-CTC_5_end_2	0	44	49	44	49	8538	6mer	x	6mer	0		0	CLEC18C	protein_coding
ENSG00000157335	mature-tRNA-Glu-CTC_5_end_3	ENSG00000157335|ENST00000618957	146	-28.39	2	23	655	686	21	0.5238	0.7143	ENSG00000157335|ENST00000618957	mature-tRNA-Glu-CTC_5_end_3	0	44	49	44	49	8539	6mer	x	6mer	0		0	CLEC18C	protein_coding
ENSG00000125843	mature-tRNA-Glu-TTC_5_end_1	ENSG00000125843|ENST00000615891	167	-32.85	2	31	3285	3314	30	0.6333	0.8	ENSG00000125843|ENST00000615891	mature-tRNA-Glu-TTC_5_end_1	0	47	52	47	52	8565	6mer	x	6mer	0		0	AP5S1	protein_coding
ENSG00000125843	mature-tRNA-Glu-TTC_5_end_2	ENSG00000125843|ENST00000615891	167	-33.94	2	31	3284	3314	30	0.6333	0.8	ENSG00000125843|ENST00000615891	mature-tRNA-Glu-TTC_5_end_2	0	47	52	47	52	8566	6mer	x	6mer	0		0	AP5S1	protein_coding
ENSG00000204138	mature-tRNA-Gly-GCC_5_end_1	ENSG00000204138|ENST00000632421	164	-25.55	2	31	965	1002	35	0.6	0.6857	ENSG00000204138|ENST00000632421	mature-tRNA-Gly-GCC_5_end_1	0	48	55	48	55	8776	8mer-1a	x	8mer-1a	0		0	PHACTR4	protein_coding
ENSG00000204138	mature-tRNA-Gly-GCC_5_end_2	ENSG00000204138|ENST00000632421	164	-26.45	2	31	964	1002	35	0.6	0.6857	ENSG00000204138|ENST00000632421	mature-tRNA-Gly-GCC_5_end_2	0	48	55	48	55	8777	8mer-1a	x	8mer-1a	0		0	PHACTR4	protein_coding
ENSG00000204138	mature-tRNA-Gly-GCC_5_end_3	ENSG00000204138|ENST00000632421	165	-26.72	2	33	962	1002	38	0.6053	0.6842	ENSG00000204138|ENST00000632421	mature-tRNA-Gly-GCC_5_end_3	0	48	55	48	55	8778	8mer-1a	x	8mer-1a	0		0	PHACTR4	protein_coding
ENSG00000132912	mature-tRNA-Glu-TTC_5_end_1	ENSG00000132912|ENST00000627368	165	-30.53	2	26	109	142	26	0.6923	0.8077	ENSG00000132912|ENST00000627368	mature-tRNA-Glu-TTC_5_end_1	0	20	25	20	25	8865	6mer	x	6mer	0		0	DCTN4	protein_coding
ENSG00000132912	mature-tRNA-Glu-TTC_5_end_2	ENSG00000132912|ENST00000627368	165	-30.53	2	26	108	142	26	0.6923	0.8077	ENSG00000132912|ENST00000627368	mature-tRNA-Glu-TTC_5_end_2	0	20	25	20	25	8866	6mer	x	6mer	0		0	DCTN4	protein_coding
ENSG00000244687	mature-tRNA-Glu-CTC_5_end_1	ENSG00000244687|ENST00000625172	158	-24.32	2	21	940	968	19	0.7368	0.7895	ENSG00000244687|ENST00000625172	mature-tRNA-Glu-CTC_5_end_1	0	24	30	24	30	8928	7mer-1a	x	7mer-1a	0		0	UBE2V1	protein_coding
ENSG00000244687	mature-tRNA-Glu-CTC_5_end_2	ENSG00000244687|ENST00000625172	158	-24.49	2	21	939	968	19	0.7368	0.7895	ENSG00000244687|ENST00000625172	mature-tRNA-Glu-CTC_5_end_2	0	24	30	24	30	8929	7mer-1a	x	7mer-1a	0		0	UBE2V1	protein_coding
ENSG00000244687	mature-tRNA-Glu-CTC_5_end_3	ENSG00000244687|ENST00000625172	158	-25.68	2	21	938	968	19	0.7368	0.7895	ENSG00000244687|ENST00000625172	mature-tRNA-Glu-CTC_5_end_3	0	24	30	24	30	8930	7mer-1a	x	7mer-1a	0		0	UBE2V1	protein_coding
ENSG00000275832	mature-tRNA-Glu-CTC_5_end_1	ENSG00000275832|ENST00000622683	158	-29.54	2	28	656	689	27	0.5926	0.7037	ENSG00000275832|ENST00000622683	mature-tRNA-Glu-CTC_5_end_1	0	15	21	15	21	8933	7mer-1a	x	7mer-1a	0		0	ARHGAP23	protein_coding
ENSG00000275832	mature-tRNA-Glu-CTC_5_end_2	ENSG00000275832|ENST00000622683	154	-25.61	2	28	658	689	27	0.5556	0.7037	ENSG00000275832|ENST00000622683	mature-tRNA-Glu-CTC_5_end_2	0	15	21	15	21	8934	7mer-1a	x	7mer-1a	0		0	ARHGAP23	protein_coding
ENSG00000275832	mature-tRNA-Glu-CTC_5_end_3	ENSG00000275832|ENST00000622683	155	-25.61	2	31	663	689	29	0.6207	0.6897	ENSG00000275832|ENST00000622683	mature-tRNA-Glu-CTC_5_end_3	0	15	21	15	21	8935	7mer-1a	x	7mer-1a	0		0	ARHGAP23	protein_coding
ENSG00000092621	mature-tRNA-Glu-CTC_5_end_1	ENSG00000092621|ENST00000641375	162	-31.53	2	32	1046	1079	31	0.6129	0.6452	ENSG00000092621|ENST00000641375	mature-tRNA-Glu-CTC_5_end_1	0	55	60	55	60	8956	6mer	x	6mer	0		0	PHGDH	protein_coding
ENSG00000092621	mature-tRNA-Glu-CTC_5_end_2	ENSG00000092621|ENST00000641375	160	-31.53	2	30	1048	1079	29	0.6207	0.6552	ENSG00000092621|ENST00000641375	mature-tRNA-Glu-CTC_5_end_2	0	55	60	55	60	8957	6mer	x	6mer	0		0	PHGDH	protein_coding
ENSG00000092621	mature-tRNA-Glu-CTC_5_end_3	ENSG00000092621|ENST00000641375	160	-31.53	2	30	1047	1079	29	0.6207	0.6552	ENSG00000092621|ENST00000641375	mature-tRNA-Glu-CTC_5_end_3	0	55	60	55	60	8958	6mer	x	6mer	0		0	PHGDH	protein_coding
ENSG00000138760	mature-tRNA-Glu-TTC_5_end_1	ENSG00000138760|ENST00000638295	163	-22.79	2	32	176	205	30	0.6	0.7	ENSG00000138760|ENST00000638295	mature-tRNA-Glu-TTC_5_end_1	0	48	53	48	53	9033	6mer	x	6mer	0		0	SCARB2	protein_coding
ENSG00000138760	mature-tRNA-Glu-TTC_5_end_2	ENSG00000138760|ENST00000638295	164	-23.38	2	33	175	205	31	0.5806	0.7097	ENSG00000138760|ENST00000638295	mature-tRNA-Glu-TTC_5_end_2	0	48	53	48	53	9034	6mer	x	6mer	0		0	SCARB2	protein_coding
ENSG00000144285	mature-tRNA-Glu-TTC_5_end_1	ENSG00000144285|ENST00000636194	167	-34.15	2	30	338	366	28	0.6429	0.7857	ENSG00000144285|ENST00000636194	mature-tRNA-Glu-TTC_5_end_1	0	18	24	18	24	9073	7mer-1a	x	7mer-1a	0		0	SCN1A	protein_coding
ENSG00000144285	mature-tRNA-Glu-TTC_5_end_2	ENSG00000144285|ENST00000636194	167	-34.15	2	30	337	366	28	0.6429	0.7857	ENSG00000144285|ENST00000636194	mature-tRNA-Glu-TTC_5_end_2	0	18	24	18	24	9074	7mer-1a	x	7mer-1a	0		0	SCN1A	protein_coding
ENSG00000104763	mature-tRNA-Glu-TTC_5_end_1	ENSG00000104763|ENST00000636701	176	-32.03	2	32	245	278	32	0.5938	0.8125	ENSG00000104763|ENST00000636701	mature-tRNA-Glu-TTC_5_end_1	0	30	35	30	35	9123	6mer	x	6mer	0		0	ASAH1	protein_coding
ENSG00000104763	mature-tRNA-Glu-TTC_5_end_2	ENSG00000104763|ENST00000636701	176	-32.03	2	32	244	278	32	0.5938	0.8125	ENSG00000104763|ENST00000636701	mature-tRNA-Glu-TTC_5_end_2	0	30	35	30	35	9124	6mer	x	6mer	0		0	ASAH1	protein_coding
ENSG00000116641	mature-tRNA-Gly-GCC_5_end_1	ENSG00000116641|ENST00000634223	157	-22.57	2	26	111	143	26	0.6154	0.8077	ENSG00000116641|ENST00000634223	mature-tRNA-Gly-GCC_5_end_1	0	17	23	17	23	9216	7mer-m8	x	7mer-m8	0		0	DOCK7	protein_coding
ENSG00000116641	mature-tRNA-Gly-GCC_5_end_2	ENSG00000116641|ENST00000634223	157	-25.84	2	26	110	143	26	0.6154	0.8077	ENSG00000116641|ENST00000634223	mature-tRNA-Gly-GCC_5_end_2	0	17	23	17	23	9217	7mer-m8	x	7mer-m8	0		0	DOCK7	protein_coding
ENSG00000116641	mature-tRNA-Gly-GCC_5_end_3	ENSG00000116641|ENST00000634223	157	-26.11	2	26	109	143	26	0.6154	0.8077	ENSG00000116641|ENST00000634223	mature-tRNA-Gly-GCC_5_end_3	0	17	23	17	23	9218	7mer-m8	x	7mer-m8	0		0	DOCK7	protein_coding
ENSG00000174667	mature-tRNA-Glu-TTC_5_end_1	ENSG00000174667|ENST00000641669	147	-20.87	2	25	76	110	25	0.52	0.72	ENSG00000174667|ENST00000641669	mature-tRNA-Glu-TTC_5_end_1	0	48	53	48	53	9241	6mer	x	6mer	0		0	OR7D4	protein_coding
ENSG00000174667	mature-tRNA-Glu-TTC_5_end_2	ENSG00000174667|ENST00000641669	147	-20.87	2	25	75	110	25	0.52	0.72	ENSG00000174667|ENST00000641669	mature-tRNA-Glu-TTC_5_end_2	0	48	53	48	53	9242	6mer	x	6mer	0		0	OR7D4	protein_coding
ENSG00000100150	mature-tRNA-Glu-CTC_5_end_1	ENSG00000100150|ENST00000645755	161	-29.9	2	32	683	714	30	0.6	0.6667	ENSG00000100150|ENST00000645755	mature-tRNA-Glu-CTC_5_end_1	0	24	29	24	29	9322	6mer	x	6mer	0		0	DEPDC5	protein_coding
ENSG00000100150	mature-tRNA-Glu-CTC_5_end_2	ENSG00000100150|ENST00000645755	159	-28.78	2	30	685	714	28	0.6071	0.6786	ENSG00000100150|ENST00000645755	mature-tRNA-Glu-CTC_5_end_2	0	24	29	24	29	9323	6mer	x	6mer	0		0	DEPDC5	protein_coding
ENSG00000100150	mature-tRNA-Glu-CTC_5_end_3	ENSG00000100150|ENST00000645755	159	-29.54	2	30	684	714	28	0.6071	0.6786	ENSG00000100150|ENST00000645755	mature-tRNA-Glu-CTC_5_end_3	0	24	29	24	29	9324	6mer	x	6mer	0		0	DEPDC5	protein_coding
ENSG00000100150	mature-tRNA-Glu-CTC_5_end_1	ENSG00000100150|ENST00000642684	161	-29.9	2	32	1382	1413	30	0.6	0.6667	ENSG00000100150|ENST00000642684	mature-tRNA-Glu-CTC_5_end_1	0	30	35	30	35	9358	6mer	x	6mer	0		0	DEPDC5	protein_coding
ENSG00000100150	mature-tRNA-Glu-CTC_5_end_2	ENSG00000100150|ENST00000642684	159	-28.78	2	30	1384	1413	28	0.6071	0.6786	ENSG00000100150|ENST00000642684	mature-tRNA-Glu-CTC_5_end_2	0	30	35	30	35	9359	6mer	x	6mer	0		0	DEPDC5	protein_coding
ENSG00000100150	mature-tRNA-Glu-CTC_5_end_3	ENSG00000100150|ENST00000642684	159	-29.54	2	30	1383	1413	28	0.6071	0.6786	ENSG00000100150|ENST00000642684	mature-tRNA-Glu-CTC_5_end_3	0	30	35	30	35	9360	6mer	x	6mer	0		0	DEPDC5	protein_coding
ENSG00000112855	mature-tRNA-Glu-TTC_5_end_1	ENSG00000112855|ENST00000642452	155	-29.25	2	32	422	449	30	0.6	0.7333	ENSG00000112855|ENST00000642452	mature-tRNA-Glu-TTC_5_end_1	0	33	39	33	39	9410	7mer-1a	x	7mer-1a	0		0	HARS2	protein_coding
ENSG00000112855	mature-tRNA-Glu-TTC_5_end_2	ENSG00000112855|ENST00000642452	156	-30.52	2	33	421	449	31	0.5806	0.7419	ENSG00000112855|ENST00000642452	mature-tRNA-Glu-TTC_5_end_2	0	33	39	33	39	9411	7mer-1a	x	7mer-1a	0		0	HARS2	protein_coding
ENSG00000256029	mature-tRNA-Glu-CTC_5_end_1	ENSG00000256029|ENST00000645519	172	-29.26	2	25	5055	5084	23	0.6957	0.7826	ENSG00000256029|ENST00000645519	mature-tRNA-Glu-CTC_5_end_1	0	25	30	25	30	9489	6mer	x	6mer	0		0	AL590560.2	protein_coding
ENSG00000256029	mature-tRNA-Glu-CTC_5_end_2	ENSG00000256029|ENST00000645519	172	-30.32	2	25	5054	5084	23	0.6957	0.7826	ENSG00000256029|ENST00000645519	mature-tRNA-Glu-CTC_5_end_2	0	25	30	25	30	9490	6mer	x	6mer	0		0	AL590560.2	protein_coding
ENSG00000256029	mature-tRNA-Glu-CTC_5_end_3	ENSG00000256029|ENST00000645519	172	-32.13	2	25	5053	5084	23	0.6957	0.7826	ENSG00000256029|ENST00000645519	mature-tRNA-Glu-CTC_5_end_3	0	25	30	25	30	9491	6mer	x	6mer	0		0	AL590560.2	protein_coding
ENSG00000134897	mature-tRNA-Glu-CTC_5_end_1	ENSG00000134897|ENST00000651855	154	-25.21	2	21	1547	1575	19	0.6316	0.8421	ENSG00000134897|ENST00000651855	mature-tRNA-Glu-CTC_5_end_1	0	26	31	26	31	9502	6mer	x	6mer	0		0	BIVM	protein_coding
ENSG00000134897	mature-tRNA-Glu-CTC_5_end_2	ENSG00000134897|ENST00000651855	154	-25.95	2	21	1546	1575	19	0.6316	0.8421	ENSG00000134897|ENST00000651855	mature-tRNA-Glu-CTC_5_end_2	0	26	31	26	31	9503	6mer	x	6mer	0		0	BIVM	protein_coding
ENSG00000134897	mature-tRNA-Glu-CTC_5_end_3	ENSG00000134897|ENST00000651855	154	-26.19	2	21	1545	1575	19	0.6316	0.8421	ENSG00000134897|ENST00000651855	mature-tRNA-Glu-CTC_5_end_3	0	26	31	26	31	9504	6mer	x	6mer	0		0	BIVM	protein_coding
ENSG00000100014	mature-tRNA-Glu-CTC_5_end_1	ENSG00000100014|ENST00000651059	166	-34.18	2	31	159	190	30	0.6667	0.7	ENSG00000100014|ENST00000651059	mature-tRNA-Glu-CTC_5_end_1	0	31	37	31	37	9517	7mer-1a	x	7mer-1a	0		0	SPECC1L	protein_coding
ENSG00000100014	mature-tRNA-Glu-CTC_5_end_2	ENSG00000100014|ENST00000651059	157	-34.69	2	30	161	190	29	0.6207	0.6897	ENSG00000100014|ENST00000651059	mature-tRNA-Glu-CTC_5_end_2	0	31	37	31	37	9518	7mer-1a	x	7mer-1a	0		0	SPECC1L	protein_coding
ENSG00000100014	mature-tRNA-Glu-CTC_5_end_3	ENSG00000100014|ENST00000651059	162	-34.69	2	31	160	190	30	0.6333	0.7	ENSG00000100014|ENST00000651059	mature-tRNA-Glu-CTC_5_end_3	0	31	37	31	37	9519	7mer-1a	x	7mer-1a	0		0	SPECC1L	protein_coding
ENSG00000104343	mature-tRNA-Glu-TTC_5_end_1	ENSG00000104343|ENST00000650817	155	-25.96	2	28	7076	7111	30	0.6	0.7333	ENSG00000104343|ENST00000650817	mature-tRNA-Glu-TTC_5_end_1	0	32	37	32	37	9526	6mer	x	6mer	0		0	UBE2W	protein_coding
ENSG00000104343	mature-tRNA-Glu-TTC_5_end_2	ENSG00000104343|ENST00000650817	155	-25.96	2	28	7075	7111	30	0.6	0.7333	ENSG00000104343|ENST00000650817	mature-tRNA-Glu-TTC_5_end_2	0	32	37	32	37	9527	6mer	x	6mer	0		0	UBE2W	protein_coding
ENSG00000173193	mature-tRNA-Glu-TTC_5_end_1	ENSG00000173193|ENST00000649945	164	-27.88	2	32	2922	2950	30	0.6667	0.7333	ENSG00000173193|ENST00000649945	mature-tRNA-Glu-TTC_5_end_1	0	15	20	15	20	9591	6mer	x	6mer	0		0	PARP14	protein_coding
ENSG00000173193	mature-tRNA-Glu-TTC_5_end_2	ENSG00000173193|ENST00000649945	164	-28.08	2	32	2921	2950	30	0.6667	0.7333	ENSG00000173193|ENST00000649945	mature-tRNA-Glu-TTC_5_end_2	0	15	20	15	20	9592	6mer	x	6mer	0		0	PARP14	protein_coding
ENSG00000175445	mature-tRNA-Gly-GCC_5_end_1	ENSG00000175445|ENST00000650478	152	-19.24	2	22	1702	1734	21	0.6667	0.7143	ENSG00000175445|ENST00000650478	mature-tRNA-Gly-GCC_5_end_1	0	28	34	28	34	9593	7mer-1a	x	7mer-1a	0		0	LPL	protein_coding
ENSG00000175445	mature-tRNA-Gly-GCC_5_end_2	ENSG00000175445|ENST00000650478	153	-20.17	2	32	1700	1734	32	0.5625	0.6562	ENSG00000175445|ENST00000650478	mature-tRNA-Gly-GCC_5_end_2	0	28	34	28	34	9594	7mer-1a	x	7mer-1a	0		0	LPL	protein_coding
ENSG00000175445	mature-tRNA-Gly-GCC_5_end_3	ENSG00000175445|ENST00000650478	158	-21.41	2	33	1699	1734	33	0.5758	0.6667	ENSG00000175445|ENST00000650478	mature-tRNA-Gly-GCC_5_end_3	0	28	34	28	34	9595	7mer-1a	x	7mer-1a	0		0	LPL	protein_coding
ENSG00000215717	mature-tRNA-Glu-TTC_5_end_1	ENSG00000215717|ENST00000651489	159	-30.08	2	32	36	67	31	0.5806	0.7097	ENSG00000215717|ENST00000651489	mature-tRNA-Glu-TTC_5_end_1	0	32	38	32	38	9622	7mer-1a	x	7mer-1a	0		0	TMEM167B	protein_coding
ENSG00000215717	mature-tRNA-Glu-TTC_5_end_2	ENSG00000215717|ENST00000651489	164	-30.08	2	33	35	67	32	0.5938	0.7188	ENSG00000215717|ENST00000651489	mature-tRNA-Glu-TTC_5_end_2	0	32	38	32	38	9623	7mer-1a	x	7mer-1a	0		0	TMEM167B	protein_coding
ENSG00000087274	mature-tRNA-Glu-TTC_5_end_1	ENSG00000087274|ENST00000651918	153	-33.15	2	31	1470	1506	34	0.5882	0.7059	ENSG00000087274|ENST00000651918	mature-tRNA-Glu-TTC_5_end_1	0	15	20	15	20	9643	6mer	x	6mer	0		0	ADD1	protein_coding
ENSG00000087274	mature-tRNA-Glu-TTC_5_end_2	ENSG00000087274|ENST00000651918	155	-33.15	2	33	1469	1506	36	0.5833	0.6944	ENSG00000087274|ENST00000651918	mature-tRNA-Glu-TTC_5_end_2	0	15	20	15	20	9644	6mer	x	6mer	0		0	ADD1	protein_coding
ENSG00000116133	mature-tRNA-Glu-TTC_5_end_1	ENSG00000116133|ENST00000649769	152	-34.59	2	32	2403	2441	36	0.5556	0.6667	ENSG00000116133|ENST00000649769	mature-tRNA-Glu-TTC_5_end_1	0	25	30	25	30	9654	6mer	x	6mer	0		0	DHCR24	protein_coding
ENSG00000116133	mature-tRNA-Glu-TTC_5_end_2	ENSG00000116133|ENST00000649769	152	-34.59	2	32	2402	2441	36	0.5556	0.6667	ENSG00000116133|ENST00000649769	mature-tRNA-Glu-TTC_5_end_2	0	25	30	25	30	9655	6mer	x	6mer	0		0	DHCR24	protein_coding
ENSG00000286132	mature-tRNA-Glu-TTC_5_end_1	ENSG00000286132|ENST00000651606	184	-26.29	2	30	2083	2116	29	0.7241	0.7586	ENSG00000286132|ENST00000651606	mature-tRNA-Glu-TTC_5_end_1	0	31	37	31	37	9660	7mer-1a	x	7mer-1a	0		0	AC022415.2	protein_coding
ENSG00000286132	mature-tRNA-Glu-TTC_5_end_2	ENSG00000286132|ENST00000651606	184	-26.29	2	30	2082	2116	29	0.7241	0.7586	ENSG00000286132|ENST00000651606	mature-tRNA-Glu-TTC_5_end_2	0	31	37	31	37	9661	7mer-1a	x	7mer-1a	0		0	AC022415.2	protein_coding
ENSG00000162601	mature-tRNA-Glu-CTC_5_end_1	ENSG00000162601|ENST00000659108	150	-26.05	2	29	4322	4356	29	0.5172	0.7241	ENSG00000162601|ENST00000659108	mature-tRNA-Glu-CTC_5_end_1	0	37	42	37	42	9686	6mer	x	6mer	0		0	MYSM1	protein_coding
ENSG00000162601	mature-tRNA-Glu-CTC_5_end_2	ENSG00000162601|ENST00000659108	146	-21.85	2	29	4324	4356	29	0.4828	0.7241	ENSG00000162601|ENST00000659108	mature-tRNA-Glu-CTC_5_end_2	0	37	42	37	42	9687	6mer	x	6mer	0		0	MYSM1	protein_coding
ENSG00000162601	mature-tRNA-Glu-CTC_5_end_3	ENSG00000162601|ENST00000659108	146	-24.04	2	29	4323	4356	29	0.4828	0.7241	ENSG00000162601|ENST00000659108	mature-tRNA-Glu-CTC_5_end_3	0	37	42	37	42	9688	6mer	x	6mer	0		0	MYSM1	protein_coding
ENSG00000251322	mature-tRNA-Glu-CTC_5_end_1	ENSG00000251322|ENST00000664402	178	-42.67	2	24	967	999	25	0.68	0.88	ENSG00000251322|ENST00000664402	mature-tRNA-Glu-CTC_5_end_1	0	20	25	20	25	9706	6mer	x	6mer	0		0	SHANK3	protein_coding
ENSG00000251322	mature-tRNA-Glu-CTC_5_end_2	ENSG00000251322|ENST00000664402	178	-42.8	2	24	966	999	25	0.68	0.88	ENSG00000251322|ENST00000664402	mature-tRNA-Glu-CTC_5_end_2	0	20	25	20	25	9707	6mer	x	6mer	0		0	SHANK3	protein_coding
ENSG00000251322	mature-tRNA-Glu-CTC_5_end_3	ENSG00000251322|ENST00000664402	178	-44.74	2	24	965	999	25	0.68	0.88	ENSG00000251322|ENST00000664402	mature-tRNA-Glu-CTC_5_end_3	0	20	25	20	25	9708	6mer	x	6mer	0		0	SHANK3	protein_coding
ENSG00000092847	mature-tRNA-Glu-TTC_5_end_1	ENSG00000092847|ENST00000674304	171	-35.34	2	25	1627	1663	27	0.6667	0.7778	ENSG00000092847|ENST00000674304	mature-tRNA-Glu-TTC_5_end_1	0	49	55	49	55	9722	7mer-1a	x	7mer-1a	0		0	AGO1	protein_coding
ENSG00000092847	mature-tRNA-Glu-TTC_5_end_2	ENSG00000092847|ENST00000674304	171	-35.34	2	25	1626	1663	27	0.6667	0.7778	ENSG00000092847|ENST00000674304	mature-tRNA-Glu-TTC_5_end_2	0	49	55	49	55	9723	7mer-1a	x	7mer-1a	0		0	AGO1	protein_coding
ENSG00000160072	mature-tRNA-Glu-TTC_5_end_1	ENSG00000160072|ENST00000673477	163	-30.25	2	32	616	650	33	0.6061	0.7273	ENSG00000160072|ENST00000673477	mature-tRNA-Glu-TTC_5_end_1	0	49	54	49	54	9737	6mer	x	6mer	0		0	ATAD3B	protein_coding
ENSG00000160072	mature-tRNA-Glu-TTC_5_end_2	ENSG00000160072|ENST00000673477	163	-30.25	2	32	615	650	33	0.6061	0.7273	ENSG00000160072|ENST00000673477	mature-tRNA-Glu-TTC_5_end_2	0	49	54	49	54	9738	6mer	x	6mer	0		0	ATAD3B	protein_coding
ENSG00000288558	mature-tRNA-Glu-CTC_5_end_1	ENSG00000288558|ENST00000674062	159	-27.28	2	27	5476	5506	25	0.56	0.8	ENSG00000288558|ENST00000674062	mature-tRNA-Glu-CTC_5_end_1	0	23	28	23	28	9774	6mer	x	6mer	0		0	DUS4L-BCAP29	protein_coding
ENSG00000288558	mature-tRNA-Glu-CTC_5_end_2	ENSG00000288558|ENST00000674062	155	-21.88	2	27	5478	5506	25	0.52	0.8	ENSG00000288558|ENST00000674062	mature-tRNA-Glu-CTC_5_end_2	0	23	28	23	28	9775	6mer	x	6mer	0		0	DUS4L-BCAP29	protein_coding
ENSG00000288558	mature-tRNA-Glu-CTC_5_end_3	ENSG00000288558|ENST00000674062	155	-22.42	2	27	5477	5506	25	0.52	0.8	ENSG00000288558|ENST00000674062	mature-tRNA-Glu-CTC_5_end_3	0	23	28	23	28	9776	6mer	x	6mer	0		0	DUS4L-BCAP29	protein_coding
ENSG00000105647	mature-tRNA-Asp-GTC_CCA_end_1	ENSG00000105647|ENST00000672815	167	-38.33	2	36	515	550	34	0.5882	0.7059	ENSG00000105647|ENST00000672815	mature-tRNA-Asp-GTC_CCA_end_1	0	20	26	20	26	9786	7mer-m8	x	7mer-m8	0		0	PIK3R2	protein_coding
ENSG00000011451	mature-tRNA-Val-AAC_5_end_1	ENSG00000011451|ENST00000673675	156	-17.34	2	17	579	596	15	0.7333	0.8667	ENSG00000011451|ENST00000673675	mature-tRNA-Val-AAC_5_end_1	0	51	58	51	58	9814	8mer-1a	x	8mer-1a	0		0	WIZ	protein_coding
ENSG00000011451	mature-tRNA-Val-CAC_5_end_1	ENSG00000011451|ENST00000673675	171	-21.92	2	28	566	596	26	0.6923	0.8077	ENSG00000011451|ENST00000673675	mature-tRNA-Val-CAC_5_end_1	0	51	58	51	58	9815	8mer-1a	x	8mer-1a	0		0	WIZ	protein_coding
ENSG00000107862	mature-tRNA-Glu-TTC_5_end_1	ENSG00000107862|ENST00000678036	160	-24.53	2	32	300	332	31	0.6129	0.6774	ENSG00000107862|ENST00000678036	mature-tRNA-Glu-TTC_5_end_1	0	23	28	23	28	9884	6mer	x	6mer	0		0	GBF1	protein_coding
ENSG00000107862	mature-tRNA-Glu-TTC_5_end_2	ENSG00000107862|ENST00000678036	160	-24.53	2	32	299	332	31	0.6129	0.6774	ENSG00000107862|ENST00000678036	mature-tRNA-Glu-TTC_5_end_2	0	23	28	23	28	9885	6mer	x	6mer	0		0	GBF1	protein_coding
ENSG00000116688	mature-tRNA-Glu-TTC_5_end_1	ENSG00000116688|ENST00000675113	173	-34.43	2	31	32	65	30	0.6	0.7667	ENSG00000116688|ENST00000675113	mature-tRNA-Glu-TTC_5_end_1	0	34	39	34	39	9928	6mer	x	6mer	0		0	MFN2	protein_coding
ENSG00000116688	mature-tRNA-Glu-TTC_5_end_2	ENSG00000116688|ENST00000675113	173	-35.97	2	31	31	65	30	0.6	0.7667	ENSG00000116688|ENST00000675113	mature-tRNA-Glu-TTC_5_end_2	0	34	39	34	39	9929	6mer	x	6mer	0		0	MFN2	protein_coding
ENSG00000135316	mature-tRNA-Glu-TTC_5_end_1	ENSG00000135316|ENST00000678528	157	-25.23	2	21	1	21	20	0.7	0.85	ENSG00000135316|ENST00000678528	mature-tRNA-Glu-TTC_5_end_1	0	45	50	45	50	9940	6mer	x	6mer	0		0	SYNCRIP	protein_coding
ENSG00000135316	mature-tRNA-Glu-TTC_5_end_2	ENSG00000135316|ENST00000678528	157	-25.23	2	21	1	21	20	0.7	0.85	ENSG00000135316|ENST00000678528	mature-tRNA-Glu-TTC_5_end_2	0	45	50	45	50	9941	6mer	x	6mer	0		0	SYNCRIP	protein_coding
ENSG00000116688	mature-tRNA-Glu-TTC_5_end_1	ENSG00000116688|ENST00000675053	173	-34.43	2	31	32	65	30	0.6	0.7667	ENSG00000116688|ENST00000675053	mature-tRNA-Glu-TTC_5_end_1	0	35	40	35	40	9989	6mer	x	6mer	0		0	MFN2	protein_coding
ENSG00000116688	mature-tRNA-Glu-TTC_5_end_2	ENSG00000116688|ENST00000675053	173	-35.97	2	31	31	65	30	0.6	0.7667	ENSG00000116688|ENST00000675053	mature-tRNA-Glu-TTC_5_end_2	0	35	40	35	40	9990	6mer	x	6mer	0		0	MFN2	protein_coding
ENSG00000148356	mature-tRNA-Glu-TTC_5_end_1	ENSG00000148356|ENST00000676349	153	-33.2	2	31	2221	2250	31	0.6452	0.7097	ENSG00000148356|ENST00000676349	mature-tRNA-Glu-TTC_5_end_1	0	17	22	17	22	10001	6mer	x	6mer	0		0	LRSAM1	protein_coding
ENSG00000148356	mature-tRNA-Glu-TTC_5_end_2	ENSG00000148356|ENST00000676349	153	-33.2	2	31	2220	2250	31	0.6452	0.7097	ENSG00000148356|ENST00000676349	mature-tRNA-Glu-TTC_5_end_2	0	17	22	17	22	10002	6mer	x	6mer	0		0	LRSAM1	protein_coding
ENSG00000143801	mature-tRNA-Asp-GTC_CCA_end_1	ENSG00000143801|ENST00000678776	162	-34.31	2	37	1643	1679	35	0.5143	0.6857	ENSG00000143801|ENST00000678776	mature-tRNA-Asp-GTC_CCA_end_1	0	28	34	28	34	10006	7mer-1a	x	7mer-1a	0		0	PSEN2	protein_coding
ENSG00000130714	mature-tRNA-Glu-CTC_5_end_1	ENSG00000130714|ENST00000677216	155	-27.48	2	31	301	333	30	0.6	0.6667	ENSG00000130714|ENST00000677216	mature-tRNA-Glu-CTC_5_end_1	0	29	34	29	34	10007	6mer	x	6mer	0		0	POMT1	protein_coding
ENSG00000130714	mature-tRNA-Glu-CTC_5_end_2	ENSG00000130714|ENST00000677216	151	-24.16	2	30	304	333	28	0.5714	0.6429	ENSG00000130714|ENST00000677216	mature-tRNA-Glu-CTC_5_end_2	0	29	34	29	34	10008	6mer	x	6mer	0		0	POMT1	protein_coding
ENSG00000130714	mature-tRNA-Glu-CTC_5_end_3	ENSG00000130714|ENST00000677216	155	-25.65	2	31	302	333	30	0.6	0.6667	ENSG00000130714|ENST00000677216	mature-tRNA-Glu-CTC_5_end_3	0	29	34	29	34	10009	6mer	x	6mer	0		0	POMT1	protein_coding
ENSG00000183735	mature-tRNA-Glu-TTC_5_end_1	ENSG00000183735|ENST00000679050	161	-29.93	2	26	54	86	24	0.5833	0.75	ENSG00000183735|ENST00000679050	mature-tRNA-Glu-TTC_5_end_1	0	41	46	41	46	10076	6mer	x	6mer	0		0	TBK1	protein_coding
ENSG00000183735	mature-tRNA-Glu-TTC_5_end_2	ENSG00000183735|ENST00000679050	161	-29.93	2	26	53	86	24	0.5833	0.75	ENSG00000183735|ENST00000679050	mature-tRNA-Glu-TTC_5_end_2	0	41	46	41	46	10077	6mer	x	6mer	0		0	TBK1	protein_coding
ENSG00000116539	mature-tRNA-Gly-GCC_5_end_1	ENSG00000116539|ENST00000679097	163	-21.54	2	24	1371	1397	22	0.6818	0.8182	ENSG00000116539|ENST00000679097	mature-tRNA-Gly-GCC_5_end_1	0	29	34	29	34	10078	6mer	x	6mer	0		0	ASH1L	protein_coding
ENSG00000116539	mature-tRNA-Gly-GCC_5_end_2	ENSG00000116539|ENST00000679097	163	-21.54	2	24	1368	1397	22	0.6818	0.8182	ENSG00000116539|ENST00000679097	mature-tRNA-Gly-GCC_5_end_2	0	29	34	29	34	10079	6mer	x	6mer	0		0	ASH1L	protein_coding
ENSG00000116539	mature-tRNA-Gly-GCC_5_end_3	ENSG00000116539|ENST00000679097	163	-21.77	2	24	1367	1397	22	0.6818	0.8182	ENSG00000116539|ENST00000679097	mature-tRNA-Gly-GCC_5_end_3	0	29	34	29	34	10080	6mer	x	6mer	0		0	ASH1L	protein_coding
