# Supplementary material for: Plasma-Derived Exosomal SncRNA as a Promising Diagnostic Biomarker for Early Detection of HBV-Related Acute-on-Chronic Liver Failure
Source: Front Cell Infect Microbiol. 2022 Jul 7;12:923300. doi: 10.3389/fcimb.2022.923300 (PMC9301338; doi:10.3389/fcimb.2022.923300)
Supplement: Supplementary file 7 [file Table_6.xlsx]

## Sheet: H vs N
Table S6：The differentially expressed rsRNAs were analyzed by sncRNA-seq.
Gene Name	L3	N1	L6	H1	N3	L5	H4	L1	L4	N2	H3	H2	L2	baseMean	log2FoldChange	lfcSE	stat	pvalue	padj	Length	Annotation (Parent RNA Category)	Gene Sequence
rsRNA-7	1.862	0.925	0.585	2.615	1.768	12.452	3.688	1.455	0.572	1.347	8.497	34.658	1.953	21.9221	2.02122	0.982174	2.05791	0.0395991	0.254675	22	28S-rRNA	AAGGCTGGGTCGGTCGGGCTGG
rsRNA-14	33.884	15.935	25.455	129.885	19.361	29.236	34.381	21.102	5.947	4.617	42.626	91.558	12.571	159.463	1.46353	0.699101	2.09344	0.0363095	0.248784	16	28S-rRNA	ACCGAACGCCGGGTTA
rsRNA-26	62.182	0.206	16.092	23.536	1.238	18.678	293.728	186.137	10.178	0.192	94.032	161.65	17.453	349.358	7.52181	1.12275	6.69946	2.09192e-11	3.11068e-08	16	45S-rRNA	AGAGAGAGAGAGAAAG
rsRNA-27	81.916	4.009	1.755	44.893	22.808	10.557	93.151	66.654	1.372	0.77	63.727	436.067	14.158	241.967	3.00504	1.14991	2.61329	0.0089676	0.107051	15	45S-rRNA	AGAGAGAGAGAGAGA
rsRNA-28	247.984	3.701	26.04	62.328	36.511	36.274	425.661	490.884	24.703	6.349	381.085	2102.22	155.125	1154.4	4.51654	1.04802	4.30958	1.63567e-05	0.00243223	16	45S-rRNA	AGAGAGAGAGAGAGAG
rsRNA-29	224.898	8.636	11.703	5.666	15.824	44.124	233.65	219.755	10.407	0.192	113.575	1292.42	99.959	637.786	4.34221	1.19685	3.62802	0.0002856	0.0132715	18	45S-rRNA	AGAGAGAGAGAGAGAGAG
rsRNA-33	11.17	12.851	8.192	64.071	2.475	38.71	25.816	9.169	44.145	5.002	17.419	482.622	0.122	176.435	2.82573	1.12656	2.50828	0.0121319	0.127043	18	28S-rRNA	AGCAGCCGACTTAGAACT
rsRNA-46	75.214	10.075	8.777	73.66	0.088	17.054	44.731	156.594	24.703	17.316	74.914	555.3	17.941	303.352	3.02997	1.08817	2.78447	0.00536159	0.0758376	15	45S-rRNA	AGGGAAAGAGAGAGC
rsRNA-57	0.372	0.822	0.585	0.436	10.874	0.541	0.357	1.164	0.114	0.385	0.708	3.88	0.976	8.95742	-2.71981	0.981864	-2.77005	0.00560485	0.0771705	21	28S-rRNA	AGGGCTGGATCGGTCGGGCTG
rsRNA-74	0.745	0.822	1.463	2.179	1.591	1.083	1.903	2.474	1.944	0.385	11.188	4.397	4.394	13.0354	1.66749	0.8335	2.00059	0.0454362	0.271834	21	28S-rRNA	AGGGCTGGGTCGGTCAGGCTG
rsRNA-117	48.778	14.496	44.18	111.579	31.03	18.678	70.19	91.395	27.905	10.389	13.878	582.974	105.085	332.127	2.04571	0.804126	2.54401	0.0109587	0.118084	19	18S-rRNA	CAACTTTCGATGGTAGTCG
rsRNA-142	53.99	6.066	31.891	87.607	0.619	24.363	14.395	47.444	80.17	23.472	28.889	391.581	89.462	252.525	2.38084	0.892944	2.66628	0.00766965	0.0976454	20	18S-rRNA	CCACTTTAAATCCTTTAACG
rsRNA-152	105.002	25.702	73.731	130.321	16.974	94.746	37.236	70.875	135.408	41.942	99.414	387.96	142.432	452.691	1.36513	0.529543	2.57795	0.00993892	0.111963	15	28S-rRNA	CCCTACTGATGATGT
rsRNA-155	45.054	1.439	33.062	137.295	0.088	8.662	25.102	35.51	18.756	10.582	42.06	113.284	10.252	151.989	3.42448	0.925625	3.69964	0.000215903	0.011466	17	28S-rRNA	CCGAATCCCGGGGCCGA
rsRNA-157	27.554	3.907	2.926	43.15	16.09	18.949	28.076	17.464	41.629	4.233	15.578	121.561	21.237	117.081	1.60728	0.755962	2.12614	0.0334913	0.241508	21	28S-rRNA	CCGAATCCCGGGGCCGAGGGA
rsRNA-160	180.216	60.039	87.482	587.535	31.737	149.157	100.645	159.796	141.469	86.77	222.618	407.616	186.614	827.029	1.47946	0.532337	2.77918	0.00544957	0.0758376	20	28S-rRNA	CCGCCCCGCGGCGGGGCGCG
rsRNA-165	23.83	4.523	14.044	14.819	0.088	23.28	27.481	8.586	5.261	2.501	20.676	3.88	22.335	70.0746	2.21782	0.984162	2.25351	0.0242268	0.194184	17	18S-rRNA	CCGTGGGTGGTGGTGCA
rsRNA-172	11.17	2.365	2.341	8.717	0.884	17.596	11.421	7.422	4.46	1.154	2.549	232.776	0.244	68.5172	3.78351	1.14008	3.31864	0.000904567	0.0249091	34	18S-rRNA	CCTGTAATTGGAATGAGTCCACTTTAAATCCTTT
rsRNA-202	98.3	6.58	25.162	64.071	5.835	10.287	21.295	22.849	48.948	17.508	38.802	208.205	7.323	177.564	1.90021	0.795097	2.3899	0.0168527	0.152805	16	28S-rRNA	CGCCCAGGCGGAACGA
rsRNA-203	16.011	5.963	19.603	32.253	0.177	21.656	24.507	6.549	18.07	10.967	19.968	174.065	26.241	110.535	2.22618	0.855824	2.60121	0.00928944	0.108564	18	28S-rRNA	CGCCCAGGCGGAACGATA
rsRNA-205	45.426	9.253	8.485	46.201	0.088	25.446	40.567	14.99	14.867	9.812	22.658	78.109	33.075	122.289	1.90711	0.893221	2.13509	0.0327533	0.238746	20	28S-rRNA	CGCCCCGCGGCGGGGCGCGG
rsRNA-210	67.023	77.002	84.264	64.507	146.486	54.682	23.555	156.012	195.106	116.784	70.807	262.002	60.781	535.136	-1.26538	0.616752	-2.05169	0.0401999	0.254675	20	28S-rRNA	CGCGACCTCAGATCAGACGT
rsRNA-222	1.489	42.87	5.852	3.051	247.532	9.204	19.51	14.408	51.693	46.367	17.985	205.101	7.689	264.395	-2.17563	1.05081	-2.07043	0.0384117	0.254675	43	28S-rRNA	CGCTGCGATCTATTGAAAGTCAGCCCTCGACACAAGGGTTTGT
rsRNA-223	59.203	36.188	28.38	160.831	31.649	88.79	42.352	43.951	59.47	45.02	128.303	545.988	79.088	413.147	1.31796	0.573504	2.29809	0.0215568	0.180084	20	28S-rRNA	CGCTTCTGGCGCCAAGCGCC
rsRNA-226	1609.29	794.899	898.811	3998.55	626.609	1366.23	1267.82	1111.15	1483.88	676.076	1614.97	5790.43	2403.16	8032.02	1.07598	0.451941	2.3808	0.0172753	0.155687	23	28S-rRNA	CGCTTCTGGCGCCAAGCGCCCGG
rsRNA-249	89.363	65.179	464.327	1131.05	19.007	99.618	67.811	587.372	102.928	50.023	173.903	608.579	391.169	1293.61	2.29236	0.853616	2.68547	0.00724288	0.0953112	19	28S-rRNA	CGGGGCGCGGGACATGTGG
rsRNA-250	45.799	6.991	30.721	44.893	58.612	19.491	115.516	3.056	52.608	10.774	122.638	313.989	68.47	295.853	1.70065	0.854667	1.98984	0.0466088	0.277229	27	5.8S-rRNA	CGGGGCTACGCCTGTCTGAGCGTCGCT
rsRNA-264	121.385	33.926	52.372	161.703	63.563	50.621	85.656	63.889	165.829	32.13	62.594	689.275	108.502	520.055	1.26688	0.615978	2.0567	0.0397148	0.254675	16	28S-rRNA	CTAAACCATTCGTAGA
rsRNA-301	14.522	3.804	17.555	20.921	0.088	32.214	6.662	17.464	11.551	4.81	8.072	50.693	22.579	73.1003	1.66873	0.820394	2.03406	0.0419458	0.260977	19	28S-rRNA	GAATCCCGGGGCCGAGGGA
rsRNA-313	129.949	3.701	42.424	67.122	4.42	51.704	211.165	230.234	1.487	6.926	172.345	1203.97	75.915	617.996	5.19935	0.970666	5.35648	8.48581e-08	3.51786e-05	15	45S-rRNA	GAGAGAGAGAGAGAG
rsRNA-314	56.969	1.645	1.463	33.125	27.14	7.85	60.792	75.823	6.519	6.157	108.76	783.678	65.907	315.044	3.1689	1.08933	2.90904	0.00362545	0.0626865	16	45S-rRNA	GAGAGAGAGAGAGAGA
rsRNA-315	118.407	7.196	3.511	30.074	36.334	14.347	123.249	87.902	8.349	3.463	173.336	994.47	112.042	462.747	3.19325	1.05841	3.01702	0.00255274	0.0506124	17	45S-rRNA	GAGAGAGAGAGAGAGAG
rsRNA-321	794.962	221.548	830.639	2115.21	426.55	636.692	537.252	717.77	326.854	542.169	1156.43	5643	808.579	4513.33	1.42924	0.52177	2.73921	0.00615872	0.0832547	17	28S-rRNA	GAGGGCGGCGGCGGCGG
rsRNA-356	17.873	0.822	31.891	60.584	7.072	13.806	31.05	30.999	25.732	3.271	39.227	199.153	29.536	146.655	3.39613	0.636367	5.33675	9.46297e-08	3.51786e-05	16	28S-rRNA	GCGGCGGCGGCGGCGG
rsRNA-370	0.745	29.197	5.266	2.615	129.247	4.331	24.388	14.99	44.717	31.745	10.055	67.505	3.906	158.496	-2.23869	1.05508	-2.12182	0.0338527	0.241508	42	28S-rRNA	GCTGCGATCTATTGAAAGTCAGCCCTCGACACAAGGGTTTGT
rsRNA-371	65.533	31.87	50.617	149.935	31.118	76.609	53.297	65.199	85.774	50.792	103.52	461.672	61.757	411.124	1.17453	0.481308	2.44029	0.0146755	0.143569	16	18S-rRNA	GCTTGCGTTGATTAAG
rsRNA-372	34.628	26.832	54.713	112.887	6.365	70.112	41.162	41.623	81.542	20.971	64.01	152.597	50.651	269.507	1.27848	0.594553	2.15032	0.0315299	0.233259	17	18S-rRNA	GCTTGCGTTGATTAAGT
rsRNA-373	65.161	3.907	15.214	50.995	11.227	40.335	20.581	140.003	23.788	0.962	41.21	78.626	23.067	190.084	2.17707	0.833457	2.61209	0.00899893	0.107051	20	28S-rRNA	GCTTGGCAGAATCAGCGGGG
rsRNA-378	8.936	34.029	16.677	107.221	11.935	26.8	22.96	47.444	43.23	16.161	45.458	642.72	30.39	273.273	1.74454	0.809758	2.1544	0.0312086	0.232036	15	28S-rRNA	GGAAGGCCCGGCGGG
rsRNA-383	31.65	29.403	109.133	376.58	83.63	41.959	39.854	113.225	92.864	44.636	211.006	1005.85	97.03	651.696	1.7417	0.673754	2.58507	0.00973595	0.111485	15	18S-rRNA	GGAGCGGGCGGGCGG
rsRNA-394	5.958	6.168	34.232	98.068	24.311	8.121	49.966	25.323	41.4	7.888	65.709	611.683	95.687	281.414	2.73151	0.846321	3.22751	0.00124871	0.0299489	16	28S-rRNA	GGCCCGGCGGGGAAGG
rsRNA-397	86.757	52.226	280.293	731.804	29.881	57.93	113.613	432.379	96.295	11.928	117.823	330.542	202.236	886.074	2.23886	0.798475	2.80392	0.0050486	0.075702	16	28S-rRNA	GGCGCGGGACATGTGG
rsRNA-399	44.309	1.028	15.799	61.02	6.277	28.424	28.433	12.661	77.311	13.083	55.938	171.737	28.804	174.359	2.61181	0.738117	3.53848	0.00040244	0.0157481	17	28S-rRNA	GGCGGCGGCGGCGGCGG
rsRNA-404	11.543	6.477	10.24	3.051	49.683	8.392	11.421	10.915	16.24	21.548	17.419	35.434	7.811	85.283	-1.44303	0.712694	-2.02475	0.0428926	0.264981	39	18S-rRNA	GGCTTTGGTGACTCTAGATAACCTCGGGCCGATCGCACG
rsRNA-425	62.554	54.796	536.887	1246.12	19.803	165.128	145.972	569.617	93.893	21.741	195.003	825.837	266.801	1380.73	3.01543	0.835987	3.60703	0.000309718	0.0139561	17	28S-rRNA	GGGCGCGGGACATGTGG
rsRNA-428	63.299	3.393	4.389	62.763	12.553	8.121	0.952	3.347	22.072	0.192	57.354	484.691	49.552	186.49	3.36319	1.19704	2.80959	0.00496041	0.075702	27	28S-rRNA	GGGCTGGGTCGGTCGGGCTGGGGCGCG
rsRNA-435	34.256	38.347	136.636	209.211	50.567	95.287	150.254	638.6	71.821	17.316	208.315	1845.91	168.185	1060.59	2.70376	0.887301	3.04717	0.00231008	0.0464201	15	18S-rRNA	GGGGCGGGCGCCGGC
rsRNA-441	2.234	0.925	2.341	3.487	1.061	1.895	0.595	1.164	0.915	0.577	2.549	34.658	1.22	13.3887	2.06024	0.856045	2.40669	0.0160978	0.150017	17	28S-rRNA	GGGGGCGGCGGCGGCGG
rsRNA-442	27.926	73.301	744.035	279.82	48.445	59.555	258.157	3079.49	163.427	41.173	387.741	4789.23	423.39	3152.51	3.20088	1.13747	2.81404	0.00489228	0.075702	15	28S-rRNA	GGGTCGGGGCGGCGG
rsRNA-462	22.341	33.206	52.372	120.297	17.062	18.137	60.197	51.81	112.421	34.439	87.235	642.978	86.167	388.502	1.68551	0.703655	2.39536	0.0166039	0.151472	15	45S-rRNA	GTACGACTCTTAGCG
rsRNA-464	25.692	8.533	20.481	62.763	22.72	7.85	22.009	29.252	19.899	20.394	66.842	182.341	30.39	164.683	1.23825	0.567998	2.18003	0.0292552	0.218606	17	45S-rRNA	GTACGACTCTTAGCGGT
rsRNA-488	27.554	0.411	54.42	8.281	10.432	13.535	44.255	7.713	28.248	5.002	421.445	273.899	181.244	362.324	4.48094	1.10728	4.04681	5.19195e-05	0.00454143	18	28S-rRNA	GTGGGGAGTTTGACTGGG
rsRNA-505	16.383	4.523	19.896	43.586	25.814	26.258	36.166	14.844	75.709	13.083	117.115	210.791	114.239	237.84	1.90202	0.793844	2.39596	0.0165769	0.151472	23	18S-rRNA	GTTGGTGGAGTGATTTGTCTGGT
rsRNA-534	129.205	347.897	268.297	245.387	1053.87	198.425	102.787	197.78	326.969	282.628	364.375	633.15	208.095	1808.15	-1.71516	0.591749	-2.89845	0.00375007	0.0633676	33	5.8S-rRNA	TCCTCCCGGGGCTACGCCTGTCTGAGCGTCGCT
rsRNA-535	1.862	16.038	1.463	0.872	109.091	1.624	12.135	12.37	18.298	14.814	10.338	65.436	5.37	110.828	-2.18538	1.04509	-2.09108	0.0365205	0.248784	43	28S-rRNA	TCGCTGCGATCTATTGAAAGTCAGCCCTCGACACAAGGGTTTG
rsRNA-536	1.117	76.18	9.07	2.179	471.194	19.22	58.293	30.999	95.838	96.198	27.473	240.018	21.237	487.632	-2.46556	1.09046	-2.26102	0.0237581	0.192611	44	28S-rRNA	TCGCTGCGATCTATTGAAAGTCAGCCCTCGACACAAGGGTTTGT
rsRNA-595	46.171	5.757	35.402	50.995	10.166	10.828	48.181	5.53	10.865	4.233	0.425	172.513	40.887	136.139	2.17982	0.98709	2.20833	0.0272214	0.209323	22	18S-rRNA	TTGGTGACTCTAGATAACCTCG
rsRNA-598	76.704	69.497	122.007	66.686	162.575	83.376	39.497	214.08	113.793	132.175	117.54	200.187	94.589	598.653	-1.12224	0.543886	-2.06337	0.0390776	0.254675	20	18S-rRNA	TTTCGATGGTAGTCGCCGTG

## Sheet: L vs N
Table S6：The differentially expressed rsRNAs were analyzed by sncRNA-seq.
Gene Name	L3	N1	L6	H1	N3	L5	H4	L1	L4	N2	H3	H2	L2	baseMean	log2FoldChange	lfcSE	stat	pvalue	padj	Length	Annotation (Parent RNA Category)	Gene Sequence
rsRNA-4	0.745	30.534	46.228	64.507	94.858	10.557	18.916	41.477	1.372	67.915	140.34	424.945	22.213	303.493	-1.98911	0.945941	-2.10278	0.0354848	0.218376	15	28S-rRNA	AAGCGGGGCTGGGCG
rsRNA-26	62.182	0.206	16.092	23.536	1.238	18.678	293.728	186.137	10.178	0.192	94.032	161.65	17.453	349.358	6.18971	1.05063	5.89144	3.82836e-09	2.84639e-06	16	45S-rRNA	AGAGAGAGAGAGAAAG
rsRNA-28	247.984	3.701	26.04	62.328	36.511	36.274	425.661	490.884	24.703	6.349	381.085	2102.22	155.125	1154.4	3.06721	0.970873	3.15923	0.00158189	0.0362805	16	45S-rRNA	AGAGAGAGAGAGAGAG
rsRNA-29	224.898	8.636	11.703	5.666	15.824	44.124	233.65	219.755	10.407	0.192	113.575	1292.42	99.959	637.786	3.13272	1.10892	2.82502	0.0047278	0.0696064	18	45S-rRNA	AGAGAGAGAGAGAGAGAG
rsRNA-44	1.489	4.009	0.878	3.051	12.995	0.541	2.736	4.948	0.915	3.078	16.286	13.967	3.051	26.4281	-2.12843	0.806465	-2.63921	0.00830993	0.0994082	22	28S-rRNA	AGGACTGGGTCGGTCGGGCTGG
rsRNA-46	75.214	10.075	8.777	73.66	0.088	17.054	44.731	156.594	24.703	17.316	74.914	555.3	17.941	303.352	2.0478	1.00849	2.03057	0.0422989	0.24099	15	45S-rRNA	AGGGAAAGAGAGAGC
rsRNA-57	0.372	0.822	0.585	0.436	10.874	0.541	0.357	1.164	0.114	0.385	0.708	3.88	0.976	8.95742	-3.01216	0.920905	-3.27087	0.00107217	0.0325861	21	28S-rRNA	AGGGCTGGATCGGTCGGGCTG
rsRNA-79	0.372	0.103	9.655	0.872	0.442	0.541	0.595	0.728	0.229	0.385	1.133	3.362	0.61	6.95663	2.31503	1.06722	2.16923	0.0300655	0.202296	22	28S-rRNA	AGGGCTGGGTCGGTCGGGATGG
rsRNA-86	1.117	5.038	0.585	12.204	2.387	0.541	12.61	2.474	0.343	0.962	5.665	6.466	2.685	21.1508	-1.67579	0.813214	-2.0607	0.0393313	0.229355	22	28S-rRNA	AGGGCTGGGTCGGTCGGGCTGA
rsRNA-100	1.489	0.308	0.293	10.461	2.033	1.354	4.64	0.728	0.114	3.848	1.558	3.104	0.854	11.2876	-1.70182	0.834341	-2.03972	0.0413784	0.238487	21	28S-rRNA	AGGGCTGGGTTGGTCGGGCTG
rsRNA-118	80.427	0.103	35.402	7.845	9.99	9.204	7.257	129.234	20.814	1.539	7.222	36.21	13.548	138.957	3.33474	0.9441	3.53219	0.000412135	0.0185711	21	28S-rRNA	CAATGTAGATAAGGGAAGTCG
rsRNA-142	53.99	6.066	31.891	87.607	0.619	24.363	14.395	47.444	80.17	23.472	28.889	391.581	89.462	252.525	2.07546	0.82767	2.50759	0.0121556	0.127292	20	18S-rRNA	CCACTTTAAATCCTTTAACG
rsRNA-152	105.002	25.702	73.731	130.321	16.974	94.746	37.236	70.875	135.408	41.942	99.414	387.96	142.432	452.691	1.44785	0.490673	2.95075	0.00317007	0.0560736	15	28S-rRNA	CCCTACTGATGATGT
rsRNA-155	45.054	1.439	33.062	137.295	0.088	8.662	25.102	35.51	18.756	10.582	42.06	113.284	10.252	151.989	2.36395	0.859878	2.74917	0.0059746	0.0800381	17	28S-rRNA	CCGAATCCCGGGGCCGA
rsRNA-156	79.682	16.038	25.455	42.278	8.752	79.045	12.848	28.088	22.644	15.007	9.63	103.197	50.529	176.829	1.36428	0.630733	2.16301	0.0305408	0.202895	19	28S-rRNA	CCGAATCCCGGGGCCGAGG
rsRNA-165	23.83	4.523	14.044	14.819	0.088	23.28	27.481	8.586	5.261	2.501	20.676	3.88	22.335	70.0746	2.1851	0.913813	2.39119	0.0167939	0.140639	17	18S-rRNA	CCGTGGGTGGTGGTGCA
rsRNA-195	11.17	13.468	4.681	17.434	20.687	6.497	6.9	17.318	7.777	34.824	4.532	125.699	15.378	92.1122	-1.50013	0.716108	-2.09484	0.0361851	0.221429	30	5.8S-rRNA	CGACTCTTAGCGGTGGATCACTCGGCTCGT
rsRNA-208	36.49	114.218	52.372	251.054	137.822	47.102	63.647	48.608	122.599	83.307	465.488	405.806	44.426	679.436	-1.38011	0.587268	-2.35004	0.0187712	0.147686	19	5.8S-rRNA	CGCCTGTCTGAGCGTCGCT
rsRNA-209	29.788	665.055	72.268	77.583	65.507	160.797	232.579	58.504	288.085	132.753	43.759	411.496	95.565	1065.14	-1.92556	0.854249	-2.25409	0.0241904	0.176329	19	28S-rRNA	CGCGACCTCAGATCAGACG
rsRNA-222	1.489	42.87	5.852	3.051	247.532	9.204	19.51	14.408	51.693	46.367	17.985	205.101	7.689	264.395	-3.23481	0.97425	-3.32031	0.00089919	0.0303885	43	28S-rRNA	CGCTGCGATCTATTGAAAGTCAGCCCTCGACACAAGGGTTTGT
rsRNA-249	89.363	65.179	464.327	1131.05	19.007	99.618	67.811	587.372	102.928	50.023	173.903	608.579	391.169	1293.61	2.18787	0.790473	2.76779	0.00564372	0.0784387	19	28S-rRNA	CGGGGCGCGGGACATGTGG
rsRNA-268	83.406	5.14	92.456	98.504	26.786	39.523	28.79	66.8	51.121	20.394	24.216	6.207	57.852	235.77	1.56717	0.717998	2.18269	0.0290585	0.198211	19	28S-rRNA	CTAATAGGGAACGTGAGCT
rsRNA-273	32.767	34.646	43.887	29.202	168.056	20.844	85.656	31.435	54.323	44.636	149.262	561.507	49.308	425.092	-1.46992	0.665668	-2.20819	0.0272313	0.190521	31	5.8S-rRNA	CTCCCGGGGCTACGCCTGTCTGAGCGTCGCT
rsRNA-274	2.606	41.637	4.389	1.308	497.892	5.955	36.88	44.533	80.856	47.522	19.826	384.597	21.847	457.147	-3.19397	1.11336	-2.86877	0.00412075	0.0661222	45	28S-rRNA	CTCGCTGCGATCTATTGAAAGTCAGCCCTCGACACAAGGGTTTGT
rsRNA-283	118.034	116.582	122.592	70.173	1596.05	31.131	66.145	288.884	72.507	430.195	270.484	1837.63	316.353	1925.65	-2.5162	0.87618	-2.87178	0.00408161	0.0661222	22	28S-rRNA	CTGGGTCGGTCGGGCTGGGGCG
rsRNA-289	48.778	9.047	97.137	220.108	13.437	109.905	7.971	125.741	26.647	38.864	36.395	182.6	331.121	432.501	2.23539	0.789903	2.82995	0.00465546	0.0696064	18	28S-rRNA	GAACAGCAGTTGGACATG
rsRNA-301	14.522	3.804	17.555	20.921	0.088	32.214	6.662	17.464	11.551	4.81	8.072	50.693	22.579	73.1003	2.29328	0.760919	3.01382	0.00257977	0.0519425	19	28S-rRNA	GAATCCCGGGGCCGAGGGA
rsRNA-313	129.949	3.701	42.424	67.122	4.42	51.704	211.165	230.234	1.487	6.926	172.345	1203.97	75.915	617.996	3.76846	0.900371	4.18545	2.846e-05	0.00325539	15	45S-rRNA	GAGAGAGAGAGAGAG
rsRNA-356	17.873	0.822	31.891	60.584	7.072	13.806	31.05	30.999	25.732	3.271	39.227	199.153	29.536	146.655	2.40523	0.593419	4.05317	5.05287e-05	0.0044035	16	28S-rRNA	GCGGCGGCGGCGGCGG
rsRNA-357	2.979	13.262	0.293	21.357	9.724	2.707	6.305	9.751	1.029	17.316	8.497	27.674	4.15	47.6098	-2.3353	0.738385	-3.16271	0.00156308	0.0362805	22	28S-rRNA	GCGGCGGCGGCGGCGGCGGGGG
rsRNA-363	33.511	63.226	41.547	323.842	189.185	62.262	69	67.964	51.579	99.661	193.729	832.303	116.313	671.573	-1.29875	0.541031	-2.40051	0.0163723	0.139917	15	28S-rRNA	GCGGGGCTGGGCGCG
rsRNA-366	2.979	28.272	10.533	21.793	5.039	9.475	37.117	13.971	8.234	49.061	10.621	38.537	7.933	102.143	-2.02561	0.718178	-2.82048	0.00479518	0.0699061	38	other-rRNA	GCTAAACCTAGCCCCAAACCCACTCCACCTTACTACCA
rsRNA-370	0.745	29.197	5.266	2.615	129.247	4.331	24.388	14.99	44.717	31.745	10.055	67.505	3.906	158.496	-2.70432	0.977779	-2.76578	0.00567864	0.0784387	42	28S-rRNA	GCTGCGATCTATTGAAAGTCAGCCCTCGACACAAGGGTTTGT
rsRNA-372	34.628	26.832	54.713	112.887	6.365	70.112	41.162	41.623	81.542	20.971	64.01	152.597	50.651	269.507	1.12098	0.551168	2.03382	0.0419695	0.240618	17	18S-rRNA	GCTTGCGTTGATTAAGT
rsRNA-373	65.161	3.907	15.214	50.995	11.227	40.335	20.581	140.003	23.788	0.962	41.21	78.626	23.067	190.084	2.85614	0.772563	3.69697	0.000218192	0.0134339	20	28S-rRNA	GCTTGGCAGAATCAGCGGGG
rsRNA-397	86.757	52.226	280.293	731.804	29.881	57.93	113.613	432.379	96.295	11.928	117.823	330.542	202.236	886.074	2.07132	0.739519	2.80091	0.00509594	0.0728622	16	28S-rRNA	GGCGCGGGACATGTGG
rsRNA-398	18.99	10.383	58.809	144.704	18.211	21.115	8.447	79.607	34.881	8.081	6.089	75.264	73.108	194.233	1.53169	0.775555	1.97495	0.0482733	0.261366	23	28S-rRNA	GGCGCGGGACATGTGGCGTACGG
rsRNA-399	44.309	1.028	15.799	61.02	6.277	28.424	28.433	12.661	77.311	13.083	55.938	171.737	28.804	174.359	2.06237	0.685369	3.00915	0.00261983	0.0519425	17	28S-rRNA	GGCGGCGGCGGCGGCGG
rsRNA-404	11.543	6.477	10.24	3.051	49.683	8.392	11.421	10.915	16.24	21.548	17.419	35.434	7.811	85.283	-1.57926	0.6607	-2.39029	0.0168351	0.140639	39	18S-rRNA	GGCTTTGGTGACTCTAGATAACCTCGGGCCGATCGCACG
rsRNA-417	2727.45	666.288	2164.81	3573.59	1766.05	2813.14	1550.49	14215.3	4142.98	1249.8	5139.77	3804.07	694.097	17638.7	1.55087	0.7278	2.13091	0.0330968	0.211084	15	28S-rRNA	GGGAGTTTGGCTGGG
rsRNA-423	44.682	11.926	43.302	67.994	0.088	29.236	17.845	8.15	51.464	7.696	21.384	81.73	73.23	159.656	2.06259	0.853478	2.41669	0.0156624	0.13781	27	18S-rRNA	GGGCACCACCAGGAGTGGAGCCTGCGG
rsRNA-425	62.554	54.796	536.887	1246.12	19.803	165.128	145.972	569.617	93.893	21.741	195.003	825.837	266.801	1380.73	2.60115	0.774245	3.3596	0.000780558	0.0283095	17	28S-rRNA	GGGCGCGGGACATGTGG
rsRNA-432	522.404	81.011	483.638	554.846	266.45	515.417	184.16	1866.46	496.343	235.299	979.974	1085.77	131.692	2796.28	1.49402	0.715085	2.08929	0.0366813	0.222126	16	28S-rRNA	GGGGAGTTTGGCTGGG
rsRNA-435	34.256	38.347	136.636	209.211	50.567	95.287	150.254	638.6	71.821	17.316	208.315	1845.91	168.185	1060.59	2.00642	0.821779	2.44156	0.0146241	0.132598	15	18S-rRNA	GGGGCGGGCGCCGGC
rsRNA-442	27.926	73.301	744.035	279.82	48.445	59.555	258.157	3079.49	163.427	41.173	387.741	4789.23	423.39	3152.51	3.34339	1.05319	3.17454	0.00150076	0.0362805	15	28S-rRNA	GGGTCGGGGCGGCGG
rsRNA-448	9.309	79.675	38.328	66.25	369.264	20.573	39.973	49.772	37.855	165.845	171.354	549.868	70.789	605.602	-2.79918	0.68107	-4.10997	3.95708e-05	0.00392279	15	28S-rRNA	GGTCGGGCTGGGGCG
rsRNA-475	179.844	8.122	34.232	160.831	7.603	41.688	26.648	28.816	6.862	16.931	11.046	37.761	14.524	205.381	1.79769	0.873167	2.05882	0.0395116	0.229507	28	28S-rRNA	GTGATTTCTGCCCAGTGCTCTGAATGTC
rsRNA-478	140.003	6.682	41.839	113.759	29.35	43.854	16.417	37.548	80.055	23.665	65.851	112.25	110.455	291.994	1.54777	0.592554	2.61204	0.00900043	0.10456	23	28S-rRNA	GTGCAGATCTTGGTGGTAGTAGC
rsRNA-482	16.383	8.225	60.272	30.946	3.625	14.077	19.035	421.901	43.23	13.468	36.961	54.832	12.449	298.852	3.14621	0.951071	3.30807	0.000939398	0.0310419	15	28S-rRNA	GTGGACGGTGTGAGG
rsRNA-487	120.641	120.386	32.184	67.122	117.136	30.319	21.652	32.308	23.902	142.757	105.928	803.852	104.475	545.962	-1.6412	0.725507	-2.26214	0.0236887	0.173523	15	28S-rRNA	GTGGGCGGGCGGGGC
rsRNA-488	27.554	0.411	54.42	8.281	10.432	13.535	44.255	7.713	28.248	5.002	421.445	273.899	181.244	362.324	2.91754	1.02689	2.84113	0.00449546	0.0696064	18	28S-rRNA	GTGGGGAGTTTGACTGGG
rsRNA-534	129.205	347.897	268.297	245.387	1053.87	198.425	102.787	197.78	326.969	282.628	364.375	633.15	208.095	1808.15	-1.73365	0.547879	-3.16429	0.00155462	0.0362805	33	5.8S-rRNA	TCCTCCCGGGGCTACGCCTGTCTGAGCGTCGCT
rsRNA-535	1.862	16.038	1.463	0.872	109.091	1.624	12.135	12.37	18.298	14.814	10.338	65.436	5.37	110.828	-3.10027	0.97035	-3.19501	0.00139827	0.0362805	43	28S-rRNA	TCGCTGCGATCTATTGAAAGTCAGCCCTCGACACAAGGGTTTG
rsRNA-536	1.117	76.18	9.07	2.179	471.194	19.22	58.293	30.999	95.838	96.198	27.473	240.018	21.237	487.632	-3.19359	1.01011	-3.16164	0.00156885	0.0362805	44	28S-rRNA	TCGCTGCGATCTATTGAAAGTCAGCCCTCGACACAAGGGTTTGT
rsRNA-539	7.075	9.047	3.804	25.716	25.018	12.182	28.552	3.347	39.227	62.528	71.515	101.128	9.642	144.85	-1.64703	0.777634	-2.11801	0.0341744	0.213518	18	28S-rRNA	TCGGGGCGGCGGCGGCGG
rsRNA-545	163.461	0.411	115.277	179.137	14.852	88.249	11.421	47.88	35.911	54.833	29.456	47.072	141.212	341.545	1.80968	0.892931	2.02667	0.0426962	0.242325	19	28S-rRNA	TGAACAGCAGTTGGACATG
rsRNA-560	66.65	112.573	61.15	369.607	443.17	83.376	78.994	79.752	71.707	438.853	310.844	2734.86	385.677	1512.19	-1.79452	0.759346	-2.36325	0.0181155	0.144827	17	18S-rRNA	TGGGAGCGGGCGGGCGG
rsRNA-566	287.452	40.506	277.367	249.31	36.511	155.383	153.348	800.142	89.891	116.784	138.924	96.731	56.997	1013.61	1.78872	0.759064	2.35649	0.0184488	0.145922	21	28S-rRNA	TGTAGATAAGGGAAGTCGGCA
rsRNA-577	7.447	0.411	3.218	8.717	1.768	2.436	0.476	14.844	2.059	2.309	2.691	0.517	10.74	22.4072	1.87486	0.880445	2.12945	0.033217	0.211084	20	28S-rRNA	TTAGTGACGCGCATGAACGG
rsRNA-578	13.405	0.308	9.655	12.64	0.53	0.812	0.238	0.146	0.801	0.577	0.566	3.621	0.732	15.0619	2.70626	1.16233	2.32831	0.0198955	0.152498	20	28S-rRNA	TTAGTGACGCGCATGAATAG
rsRNA-594	102.396	108.975	117.325	426.704	563.223	52.787	83.157	116.281	90.806	269.353	455.575	1514.34	318.55	1384.02	-1.62731	0.653221	-2.49122	0.0127307	0.127909	18	18S-rRNA	TTGGGAGCGGGCGGGCGG
