# Supplementary material for: Plasma-Derived Exosomal SncRNA as a Promising Diagnostic Biomarker for Early Detection of HBV-Related Acute-on-Chronic Liver Failure
Source: Front Cell Infect Microbiol. 2022 Jul 7;12:923300. doi: 10.3389/fcimb.2022.923300 (PMC9301338; doi:10.3389/fcimb.2022.923300)
Supplement: Supplementary file 8 [file Table_7.xlsx]

## Sheet: Sheet1
Table S7: List of 20 sncRNA candidates used in this study.
Gene Name	L3	N1	L6	H1	N3	L5	H4	L1	L4	N2	H3	H2	L2	Annotation (Parent RNA Category)	Gene Sequence
rsRNA-26	62.182	0.206	16.092	23.536	1.238	18.678	293.728	186.137	10.178	0.192	94.032	161.65	17.453	45S-rRNA	AGAGAGAGAGAGAAAG
rsRNA-28	247.984	3.701	26.04	62.328	36.511	36.274	425.661	490.884	24.703	6.349	381.085	2102.22	155.125	45S-rRNA	AGAGAGAGAGAGAGAG
rsRNA-249	89.363	65.179	464.327	1131.05	19.007	99.618	67.811	587.372	102.928	50.023	173.903	608.579	391.169	28S-rRNA	CGGGGCGCGGGACATGTGG
tsRNA-18	137.769	697.336	71.39	162.575	367.761	54.953	285.519	202.291	362.079	282.436	136.233	183.117	431.568	mature-tRNA-Gly-GCC_5_end;mature-tRNA-Gly-CCC_5_end	GCATTGGTGGTTCAGTGGTAGAATTCTCGC
tsRNA-20	264.739	488.433	154.776	283.307	2530.39	259.333	409.482	681.824	614.139	430.003	303.339	539.522	874.12	mature-tRNA-Gly-GCC_5_end;mature-tRNA-Gly-CCC_5_end	GCATTGGTGGTTCAGTGGTAGAATTCTCGCCT
tsRNA-22	254.686	663.307	162.968	134.244	1589.07	351.913	467.537	619.535	557.528	652.989	348.797	1318.8	1028.39	mature-tRNA-Gly-GCC_5_end;mature-tRNA-Gly-CCC_5_end	GCATTGGTGGTTCAGTGGTAGAATTCTCGCCTGC
rsRNA-435	34.256	38.347	136.636	209.211	50.567	95.287	150.254	638.6	71.821	17.316	208.315	1845.91	168.185	18S-rRNA	GGGGCGGGCGCCGGC
rsRNA-442	27.926	73.301	744.035	279.82	48.445	59.555	258.157	3079.49	163.427	41.173	387.741	4789.23	423.39	28S-rRNA	GGGTCGGGGCGGCGG
hsa-miR-148b-3p	395.061	493.574	339.98	400.552	921.79	72.007	102.787	205.93	109.333	485.798	164.556	152.08	281.203	hsa-miR-148b-3p	hsa-miR-148b-3p
hsa-miR-151a-3p	2386	4104.85	2656.06	5246.41	16251.9	1453.13	1597.12	2440.01	1811.31	5002.47	1788.59	1327.86	3401.65	hsa-miR-151a-3p	hsa-miR-151a-3p
hsa-miR-223-3p	3562.99	17355	6902.88	5545.41	17458.3	5698.83	6019.81	3089.53	8541.9	7496.29	3723.76	3160.84	10007.6	hsa-miR-223-3p	hsa-miR-223-3p
hsa-miR-23b-3p	331.762	981.801	371.871	531.745	586.827	312.12	380.454	301.108	341.722	1144.94	292.859	462.448	330.144	hsa-miR-23b-3p	hsa-miR-23b-3p
hsa-miR-320c	53.618	22.617	52.08	56.226	9.459	60.637	108.14	109.587	67.018	15.007	59.478	364.941	262.407	hsa-miR-320c	hsa-miR-320c
hsa-miR-320d	43.565	20.664	42.424	51.867	7.426	40.335	103.739	90.958	45.288	11.736	43.617	211.05	235.19	hsa-miR-320d	hsa-miR-320d
hsa-miR-339-5p	172.769	574.482	380.941	699.55	1196.02	190.033	215.091	168.382	210.088	669.15	207.182	193.204	207.607	hsa-miR-339-5p	hsa-miR-339-5p
hsa-miR-432-5p	382.401	631.848	260.105	599.303	3651.53	77.421	88.868	436.163	145.472	407.878	115.699	216.481	74.694	hsa-miR-432-5p	hsa-miR-432-5p
hsa-miR-744-5p	116.917	607.792	133.125	230.132	884.484	180.558	123.606	99.545	178.981	328.803	97.573	356.147	123.88	hsa-miR-744-5p	hsa-miR-744-5p
hsa-miR-7847-3p	317.613	16.86	122.007	49.688	24.311	20.573	29.742	68.255	7.434	14.622	130.427	2483.46	138.16	hsa-miR-7847-3p	hsa-miR-7847-3p
tsRNA-46	63.671	532.743	34.525	53.175	297.922	29.777	269.102	180.461	277.906	199.321	67.409	374.51	139.259	mature-tRNA-Glu-CTC_5_end;mature-tRNA-Glu-TTC_5_end	TCCCTGGTGGTCTAGTGGTTAGGATTCGGCG
rsRNA-534	129.205	347.897	268.297	245.387	1053.87	198.425	102.787	197.78	326.969	282.628	364.375	633.15	208.095	5.8S-rRNA	TCCTCCCGGGGCTACGCCTGTCTGAGCGTCGCT
