# Supplementary material for: Plasma-Derived Exosomal SncRNA as a Promising Diagnostic Biomarker for Early Detection of HBV-Related Acute-on-Chronic Liver Failure
Source: Front Cell Infect Microbiol. 2022 Jul 7;12:923300. doi: 10.3389/fcimb.2022.923300 (PMC9301338; doi:10.3389/fcimb.2022.923300)
Supplement: Supplementary file 9 [file Table_8.xlsx]

## Sheet: Sheet1
Table S8: Sequences of primers used in this study.
Primer sequences for qRT-PCR
GENE NAME	Sequences (5'-3')
hsa-miR-23b-3p-RT	GTCGTATCCAGTGCAGGGTCCGAGGTATTCGCACTGGATACGACGTGGTA
hsa-miR-23b-3p-qFw	CGATCACATTGCCAGGGAT
hsa-miR-339-5p-RT	GTCGTATCCAGTGCAGGGTCCGAGGTATTCGCACTGGATACGACCGTGAG
hsa-miR-339-5p-qFw	CGTCCCTGTCCTCCAGGAG
hsa-miR-223-3p-RT	GTCGTATCCAGTGCAGGGTCCGAGGTATTCGCACTGGATACGACTGGGGT
hsa-miR-223-3p-qFw	GCTGCGTGTCAGTTTGTCAAAT
cel-miR-39-3p-RT	GTCGTATCCAGTGCAGGGTCCGAGGTATTCGCACTGGATACGACCAAGCT
cel-miR-39-3p-qFw	GCGTCACCGGGTGTAAATC
tsRNA-20-RT	GTCGTATCCAGTGCAGGGTCCGAGGTATTCGCACTGGATACGACAGGCGA
tsRNA-20-qFw	TTGGTGGTTCAGTGGTAGAATTC
tsRNA-46-RT	GTCGTATCCAGTGCAGGGTCCGAGGTATTCGCACTGGATACGACCGCCGA
tsRNA-46-qFw	CCTGGTGGTCTAGTGGTTAGGAT
rsRNA-249-RT	GTCGTATCCAGTGCAGGGTCCGAGGTATTCGCACTGGATACGACCCACAT
rsRNA-249-qFw	TATTATTCGGGGCGCGGGAC
universal-qRe	AGTGCAGGGTCCGAGGTATT
